# Supplementary material for: Alternative splicing downstream of EMT enhances phenotypic plasticity and malignant behavior in colon cancer
Source: eLife journal article supplement (doi:10.7554/elife.82006), 2022-11-08

Figure 1- figure supplement 1

A

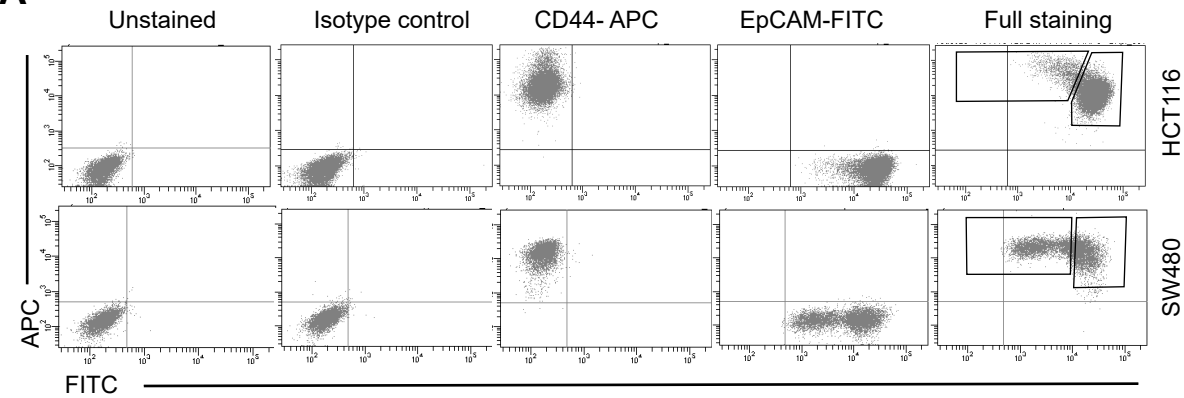

C

| Gene Name | log2FC_HCT116 | log2FC_SW480 |
|-----------|---------------|--------------|
| ESRP1     | -2.22645      | -6.89236     |
| ESRP2     | -0.896173     | -1.89007     |
| NOVA2     | 0.757111      | 2.2421       |
| RBM47     | -1.36442      | -0.900345    |
| MBNL2     | 0.784795      | 0.355627     |
| MBNL3     | -0.637449     | -2.0392      |
| RBM24     | 1.52564       | NS           |
| RBM19     | -0.496814     | NS           |
| HNRNPAB   | -0.452521     | NS           |
| HNRNPF    | -0.352169     | NS           |
| RBM43     | 0.490142      | NS           |
| U2AF2     | -0.385724     | NS           |
| RBM14     | NS            | -0.458869    |
| QKI       | NS            | 0.643307     |
| SRSF5     | NS            | 0.412868     |
| HNRNPH1   | NS            | 0.244149     |

B

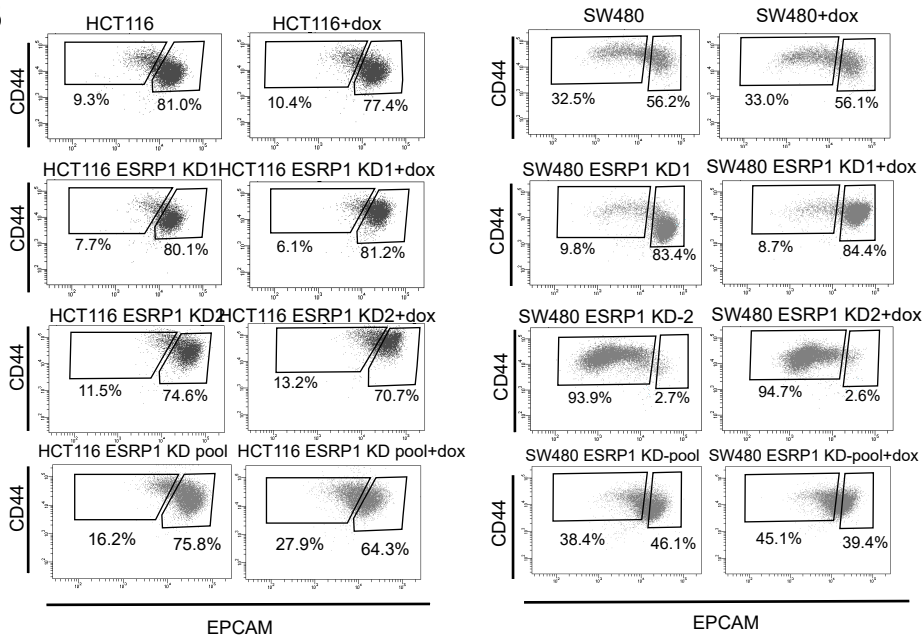

D

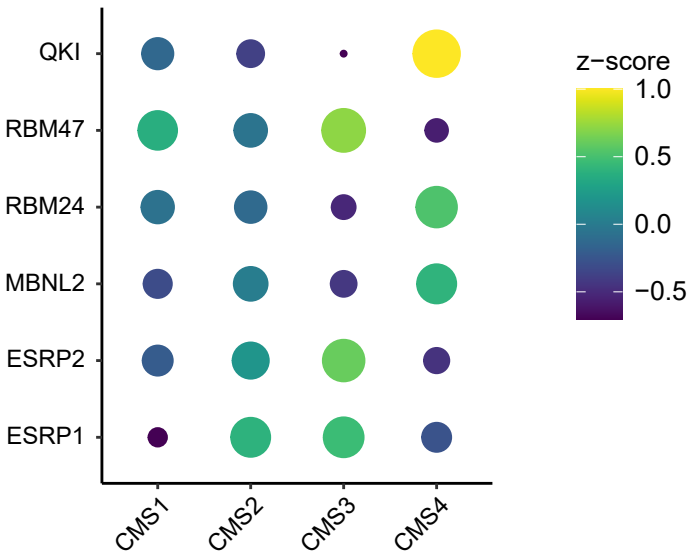

Supplement: supp [file elife-82006-supp-v1.zip]
