# Supplementary material for: Alternative splicing downstream of EMT enhances phenotypic plasticity and malignant behavior in colon cancer
Source: eLife journal article supplement (doi:10.7554/elife.82006), 2022-11-08

Suppl Figure 3B

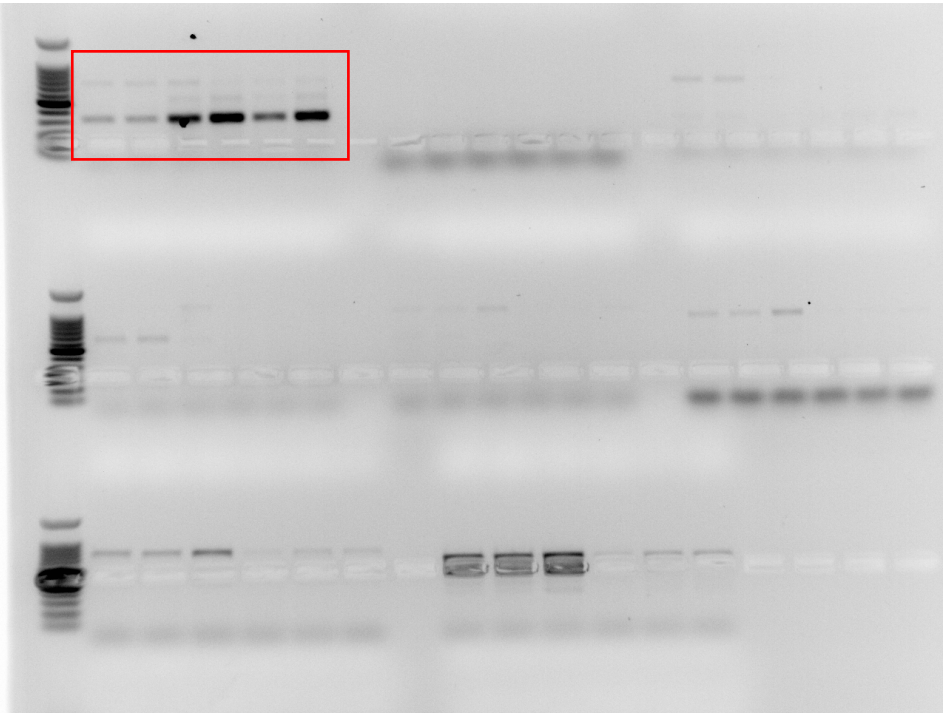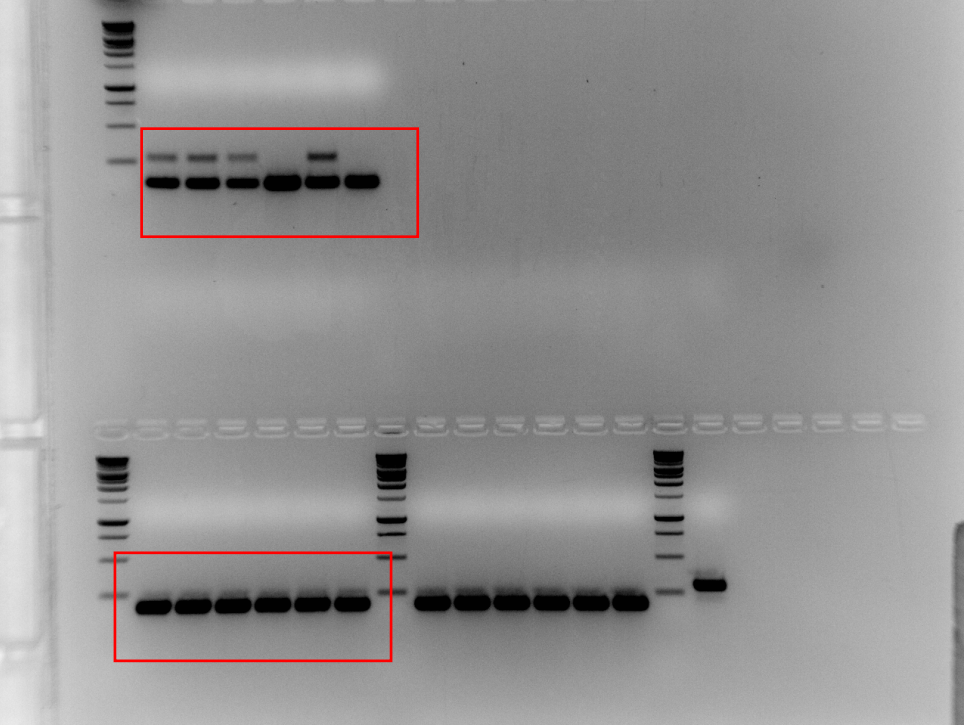

Supplement: supp [file elife-82006-supp-v1.zip]
