# Supplementary material for: Alternative splicing downstream of EMT enhances phenotypic plasticity and malignant behavior in colon cancer
Source: eLife. 2022 Nov 8;11:e82006. doi: 10.7554/eLife.82006 (PMC9674345; doi:10.7554/eLife.82006)
Supplement: Supplementary file 1. [file elife-82006-supp1.xlsx]

## Sheet: ESRP1KD_AS_diffpsi0.1
Supplementary File 1a. List of alternative splicing targets in ESRP1 knocking down H358 line, filtered by ΔPSI > 0.1
event_name	symbol	psi_CTRL1	psi_CTRL2	psi_CTRL3	psi_ESRP1	psi_ESRP2	psi_ESRP3	psi_mean_group1	psi_mean_group2	psi_max_group1	psi_max_group2	psi_min_group1	psi_min_group2	change_type
chr10:100183838:100183730|100183687:-@chr10:100180878:100181038:-	MIR4685,HPS1	0.32	0.41	0.37	0.55	0.43	0.72	0.366667	0.566667	0.41	0.72	0.32	0.43	up
chr10:103334625:103334666:-@chr10:103334349:103334467:-@chr10:103333255:103333428:-	POLL	0.61	0.65	0.54	0.75	0.75	0.71	0.6	0.736667	0.65	0.75	0.54	0.71	up
chr10:103334666:103334625|103334349:-@chr10:103333255:103333428:-	POLL	0.68	0.73	0.66	0.82	0.8	0.81	0.69	0.81	0.73	0.82	0.66	0.8	up
chr10:104818182:104818469:+@chr10:104821521:104821586:+@chr10:104825833:104826017:+	CNNM2	0.49	0.39	0.5	0.62	0.63	0.82	0.46	0.69	0.5	0.82	0.39	0.62	up
chr10:105201903:105202152:-@chr10:105200948|105201032:105200830:-	CALHM2	0.7	0.65	0.61	0.82	0.85	0.83	0.653333	0.833333	0.7	0.85	0.61	0.82	up
chr10:111625276:111627615:-@chr10:111623175|111623325:111623115:-	XPNPEP1	0.11	0.09	0.11	0.36	0.18	0.24	0.103333	0.26	0.11	0.36	0.09	0.18	up
chr10:114895760:114895846:+@chr10:114900732|114900747:114900872:+	TCF7L2	0.27	0.35	0.38	0.39	0.59	0.42	0.333333	0.466667	0.38	0.59	0.27	0.39	up
chr10:12231857:12231966:+@chr10:12237783:12237936:+@chr10:12238912:12239072:+	SEC61A2	0.57	0.67	0.84	0.85	0.89	0.89	0.693333	0.876667	0.84	0.89	0.57	0.85	up
chr10:123268186:123268333:-@chr10:123266823:123266967:-@chr10:123264621:123264823:-	FGFR2	0.07	0.05	0.07	0.45	0.35	0.42	0.0633333	0.406667	0.07	0.45	0.05	0.35	up
chr10:123651896:123652125:-@chr10:123648346:123648474:-@chr10:123619511:123619543:-	ATE1	0.58	0.61	0.33	0.77	0.63	0.68	0.506667	0.693333	0.61	0.77	0.33	0.63	up
chr10:124176448:124176537:+@chr10:124177782:124177822:+@chr10:124179130:124181860:+	PLEKHA1	0.06	0.07	0.12	0.18	0.13	0.27	0.0833333	0.193333	0.12	0.27	0.06	0.13	up
chr10:27094153:27094253:-@chr10:27084590:27084676:-@chr10:27080533:27080718:-	ABI1	0.76	0.62	0.72	0.78	0.89	0.85	0.7	0.84	0.76	0.89	0.62	0.78	up
chr10:50417014:50417174:-@chr10:50411026|50411030:50410595:-	ERCC6	0.73	0.62	0.68	0.82	0.88	0.76	0.676667	0.82	0.73	0.88	0.62	0.76	up
chr10:5895183:5895518:-@chr10:5893843:5893925:-@chr10:5887243:5887328:-@chr10:5882567:5882674:-	GDI2	0.14	0.16	0.22	0.26	0.36	0.28	0.173333	0.3	0.22	0.36	0.14	0.26	up
chr10:61510301:61510382:-@chr10:61498401:61506212:-@chr10:61497699:61497773:-	ANK3	0.02	0.03	0.01	0.44	0.19	0.18	0.02	0.27	0.03	0.44	0.01	0.18	up
chr10:62415609:62415709:-@chr10:62371568:62371618:-@chr10:62341115:62341316:-	RHOBTB1	0.61	0.74	0.35	0.78	0.79	0.75	0.566667	0.773333	0.74	0.79	0.35	0.75	up
chr10:69721802:69721773|69721769:-@chr10:69716790:69718782:-	PBLD	0.41	0.37	0.45	0.55	0.6	0.46	0.41	0.536667	0.45	0.6	0.37	0.46	up
chr10:72752513:72752817:+@chr10:72773972:72774054:+@chr10:72781325:72781551:+	SLC29A3	0.66	0.76	0.76	0.83	0.84	0.82	0.726667	0.83	0.76	0.84	0.66	0.82	up
chr10:91393434:91393693:-@chr10:91388886:91388979:-@chr10:91361433:91361785:-	PANK1	0.14	0.07	0.17	0.19	0.3	0.33	0.126667	0.273333	0.17	0.33	0.07	0.19	up
chr10:94232992:94233074:-@chr10:94229014:94229158:-@chr10:94228382:94228526:-	IDE	0.4	0.68	0.69	0.79	0.77	0.7	0.59	0.753333	0.69	0.79	0.4	0.7	up
chr10:95145889:95145971:-@chr10:95142664:95142702:-@chr10:95138777:95138901:-	MYOF	0.35	0.41	0.47	0.83	0.85	0.85	0.41	0.843333	0.47	0.85	0.35	0.83	up
chr11:111449914:111450208:-@chr11:111449139|111449155:111448932:-	PIH1D2	0.07	0.06	0.12	0.44	0.15	0.25	0.0833333	0.28	0.12	0.44	0.06	0.15	up
chr11:111569407:111570688|111569630:+@chr11:111575632:111575760:+	BCO2	0.32	0.37	0.23	0.39	0.39	0.51	0.306667	0.43	0.37	0.51	0.23	0.39	up
chr11:113251377:113251501:-@chr11:113250449:113250811:-@chr11:113230190:113230267:-	USP28	0.27	0.32	0.3	0.55	0.43	0.42	0.296667	0.466667	0.32	0.55	0.27	0.42	up
chr11:118464555:118465051|118464768:+@chr11:118465137:118465196:+	HMBS	0.54	0.62	0.57	0.69	0.79	0.68	0.576667	0.72	0.62	0.79	0.54	0.68	up
chr11:123116335:123116454:-@chr11:123116035:123116150:-	ZNF202	0.3	0.3	0.18	0.46	0.38	0.36	0.26	0.4	0.3	0.46	0.18	0.36	up
chr11:124477743:124477915:-@chr11:124477423|124477457:124477238:-	TMEM218	0.59	0.38	0.48	0.6	0.68	0.62	0.483333	0.633333	0.59	0.68	0.38	0.6	up
chr11:12842961:12843023:+@chr11:12857012:12857023:+@chr11:12857831:12857965:+	TEAD1	0.17	0.3	0.29	0.48	0.53	0.56	0.253333	0.523333	0.3	0.56	0.17	0.48	up
chr11:12967579:12967671:-@chr11:12966525:12966589:-@chr11:12964163:12964267:-	LINC00958	0.42	0.34	0.48	0.53	0.57	0.52	0.413333	0.54	0.48	0.57	0.34	0.52	up
chr11:14336885:14337305:-@chr11:14334808:14334891:-@chr11:14286329:14286439:-@chr11:14273890:14273977:-	RRAS2	0.25	0.35	0.28	0.51	0.46	0.59	0.293333	0.52	0.35	0.59	0.25	0.46	up
chr11:14858258:14858890:-@chr11:14857329|14857565:14857236:-	CYP2R1	0.55	0.59	0.6	0.75	0.66	0.89	0.58	0.766667	0.6	0.89	0.55	0.66	up
chr11:18377554:18377577:+@chr11:18377609:18377671:+	LDHA	0.45	0.47	0.33	0.51	0.5	0.66	0.416667	0.556667	0.47	0.66	0.33	0.5	up
chr11:19095258:19095399:+@chr11:19121106:19121246:+@chr11:19124304:19124426:+	ZDHHC13	0.6	0.42	0.59	0.67	0.66	0.62	0.536667	0.65	0.6	0.67	0.42	0.62	up
chr11:20026850:20027317:+@chr11:20027958:20028023:+@chr11:20029411:20029455:+	NAV2	0.37	0.47	0.32	0.62	0.68	0.61	0.386667	0.636667	0.47	0.68	0.32	0.61	up
chr11:33732622:33732577|33731233:-@chr11:33729645:33729729:-	FBXO3	0.12	0.19	0.1	0.25	0.56	0.27	0.136667	0.36	0.19	0.56	0.1	0.25	up
chr11:35167785:35168188:+@chr11:35176244:35176369:+@chr11:35182635:35182763:+@chr11:35186228:35186329:+	CD44	0.18	0.22	0.25	0.4	0.45	0.3	0.216667	0.383333	0.25	0.45	0.18	0.3	up
chr11:3731122:3731214:-@chr11:3722315:3722455:-@chr11:3712997:3713130:-	NUP98	0.81	0.79	0.63	0.86	0.83	0.86	0.743333	0.85	0.81	0.86	0.63	0.83	up
chr11:47273623:47273706|47273694:+@chr11:47274024:47274182:+	MADD	0.49	0.46	0.59	0.68	0.73	0.63	0.513333	0.68	0.59	0.73	0.46	0.63	up
chr11:57261656:57261716:+@chr11:57261884:57262074:+@chr11:57262402:57262514:+	TMX2	0.81	0.68	0.75	0.88	0.87	0.87	0.746667	0.873333	0.81	0.88	0.68	0.87	up
chr11:57285810:57286094:+@chr11:57313085:57313203:+@chr11:57315433:57315721:+	CTNND1	0.12	0.17	0.23	0.62	0.68	0.7	0.173333	0.666667	0.23	0.7	0.12	0.62	up
chr11:57285810:57286094:+@chr11:57315433:57315721:+@chr11:57318058:57318129:+	CTNND1	0.06	0.05	0.05	0.18	0.16	0.19	0.0533333	0.176667	0.06	0.19	0.05	0.16	up
chr11:57285810:57286167:+@chr11:57315433|57315540:57315721:+	CTNND1	0.29	0.24	0.33	0.7	0.84	0.86	0.286667	0.8	0.33	0.86	0.24	0.7	up
chr11:63228899:63228955:+@chr11:63242750:63245080:+@chr11:63270995:63271072:+@chr11:63274039:63274471:+	RTN3	0.32	0.32	0.33	0.48	0.43	0.54	0.323333	0.483333	0.33	0.54	0.32	0.43	up
chr11:63440378:63441198:-@chr11:63439819:63439836:-@chr11:63439603:63439659:-	RCOR2	0.15	0.19	0.2	0.34	0.22	0.34	0.18	0.3	0.2	0.34	0.15	0.22	up
chr11:6522380:6522477:+@chr11:6522683:6525472:+	DNHD1	0.54	0.66	0.44	0.83	0.83	0.76	0.546667	0.806667	0.66	0.83	0.44	0.76	up
chr11:65893579:65893416|65893107:-@chr11:65892584:65892718:-	SLC29A2	0.35	0.33	0.4	0.67	0.42	0.43	0.36	0.506667	0.4	0.67	0.33	0.42	up
chr11:67574180:67574297:+@chr11:67574530:67574707:+@chr11:67574784:67574975:+	TCIRG1	0.6	0.56	0.54	0.96	0.95	0.95	0.566667	0.953333	0.6	0.96	0.54	0.95	up
chr11:68269035:68269155:-@chr11:68266362:68266438:-@chr11:68260176:68262832:-	TESMIN	0.15	0.12	0.14	0.23	0.4	0.45	0.136667	0.36	0.15	0.45	0.12	0.23	up
chr11:71178477:71178539:+@chr11:71182074:71182175:+@chr11:71184711:71185002:+	FAM86C1	0.19	0.16	0.16	0.32	0.34	0.32	0.17	0.326667	0.19	0.34	0.16	0.32	up
chr11:71469013:71469579:+@chr11:71477034:71477074:+@chr11:71482190:71482395:+	LRTOMT	0.16	0.24	0.39	0.57	0.55	0.59	0.263333	0.57	0.39	0.59	0.16	0.55	up
chr11:72217052:72217201:+@chr11:72217422:72217469:+	ATG16L2	0.25	0.17	0.2	0.74	0.4	0.57	0.206667	0.57	0.25	0.74	0.17	0.4	up
chr11:73109539:73109592:-@chr11:73107478:73107583:-@chr11:73107306:73107411:-@chr11:73104944:73105055:-	RAB6A	0.49	0.4	0.41	0.56	0.62	0.56	0.433333	0.58	0.49	0.62	0.4	0.56	up
chr11:73176009:73176685:+@chr11:73178028:73178183:+@chr11:73193720:73193772:+	MRPL48	0.09	0.07	0.08	0.32	0.15	0.12	0.08	0.196667	0.09	0.32	0.07	0.12	up
chr11:82599544:82600120:+@chr11:82602606:82602723:+@chr11:82613545:82613745:+	ANKRD42	0.09	0.14	0.1	0.22	0.15	0.28	0.11	0.216667	0.14	0.28	0.09	0.15	up
chr12:103227667:103228007|103227858:+@chr12:103229198:103229344:+	TXNRD1	0.46	0.4	0.5	0.61	0.76	0.51	0.453333	0.626667	0.5	0.76	0.4	0.51	up
chr12:122025203:122025621:+@chr12:122026311:122026367:+@chr12:122027154:122027267:+	OGFOD2	0.68	0.74	0.77	0.88	0.9	0.82	0.73	0.866667	0.77	0.9	0.68	0.82	up
chr12:128160176:128160255:+@chr12:128161491:128161637:+@chr12:128163563:128163801:+	LOC283352	0.63	0.46	0.34	0.78	0.76	0.71	0.476667	0.75	0.63	0.78	0.34	0.71	up
chr12:12867404:12867520:+@chr12:12868741:12868878:+	DDX47	0.26	0.37	0.28	0.45	0.4	0.59	0.303333	0.48	0.37	0.59	0.26	0.4	up
chr12:131030192:131030291:+@chr12:131031987:131032094:+@chr12:131032591:131033467:+	EP400	0.49	0.47	0.35	0.6	0.6	0.76	0.436667	0.653333	0.49	0.76	0.35	0.6	up
chr12:132278115:132278662:+@chr12:132280087:132280192:+@chr12:132288803:132289534:+	ZNF268	0.4	0.47	0.46	0.66	0.6	0.54	0.443333	0.6	0.47	0.66	0.4	0.54	up
chr12:26000839:26000984:-@chr12:26000427:26000547:-@chr12:25996407:25999441:-		0.82	0.71	0.67	0.83	0.86	0.87	0.733333	0.853333	0.82	0.87	0.67	0.83	up
chr12:27720628:27720799:+@chr12:27721264:27721296:+@chr12:27723689:27723839:+	PPFIBP1	0.56	0.58	0.64	0.78	0.74	0.82	0.593333	0.78	0.64	0.82	0.56	0.74	up
chr12:30760709:30760877:-@chr12:30759342|30759345:30759160:-	CAPRIN2	0.45	0.28	0.41	0.69	0.78	0.68	0.38	0.716667	0.45	0.78	0.28	0.68	up
chr12:30767460:30767515:-@chr12:30763426|30765116:30763280:-	CAPRIN2	0.19	0.32	0.11	0.4	0.34	0.38	0.206667	0.373333	0.32	0.4	0.11	0.34	up
chr12:32381700:32381907:+@chr12:32382987:32383180:+@chr12:32411871:32411946:+	BICD1	0.09	0.13	0.24	0.35	0.35	0.31	0.153333	0.336667	0.24	0.35	0.09	0.31	up
chr12:37999975:38000082:-@chr12:37996001:37996039:-@chr12:37991484:37991622:-	KIF21A	0.09	0.11	0.17	0.57	0.27	0.21	0.123333	0.35	0.17	0.57	0.09	0.21	up
chr12:46585005:46585089:-@chr12:46562744:46562824:-@chr12:46559018:46559165:-	VDR	0.72	0.62	0.53	0.75	0.79	0.83	0.623333	0.79	0.72	0.83	0.53	0.75	up
chr12:47811348:47811571:-@chr12:47810324|47810394:47810169:-	TUBA1B	0.51	0.65	0.52	0.72	0.81	0.75	0.56	0.76	0.65	0.81	0.51	0.72	up
chr12:48051278:48051340:+@chr12:48067104:48067187:+@chr12:48086523:48086615:+@chr12:48140820:48141087:+	SPATS2	0.28	0.41	0.27	0.68	0.42	0.72	0.32	0.606667	0.41	0.72	0.27	0.42	up
chr12:50731454:50731619:+@chr12:50732525:50732696:+@chr12:50734378:50736210:+	NR4A1	0.14	0.16	0.09	0.2	0.28	0.4	0.13	0.293333	0.16	0.4	0.09	0.2	up
chr12:52868566:52869007:-@chr12:52867891|52867956:52867870:-	SMUG1	0.49	0.2	0.33	0.69	0.51	0.68	0.34	0.626667	0.49	0.69	0.2	0.51	up
chr12:54510011:54511134:+@chr12:54513010:54513065:+@chr12:54513498:54513639:+	TMEM198B	0.14	0.23	0.24	0.4	0.28	0.4	0.203333	0.36	0.24	0.4	0.14	0.28	up
chr12:54619967:54620221:+@chr12:54620303|54620365:54620484:+	DGKA	0.11	0.07	0.18	0.35	0.24	0.4	0.12	0.33	0.18	0.4	0.07	0.24	up
chr12:56227078:56227380:-@chr12:56218569:56218574:-@chr12:56215106:56215895:-	DCTN2	0.14	0.17	0.18	0.32	0.22	0.42	0.163333	0.32	0.18	0.42	0.14	0.22	up
chr12:61245284:61245427:+@chr12:61246061:61246078:+@chr12:61246369:61246497:+	MON2	0.61	0.55	0.61	0.8	0.88	0.91	0.59	0.863333	0.61	0.91	0.55	0.8	up
chr12:65057221:65057332:-@chr12:65057064:65057108:-@chr12:65051741:65051974:-	GRIP1	0.24	0.23	0.08	0.35	0.31	0.53	0.183333	0.396667	0.24	0.53	0.08	0.31	up
chr12:6703714:6704245:+@chr12:6705292:6705386:+@chr12:6707098:6707227:+@chr12:6707353:6707428:+	COPS7A	0.61	0.32	0.54	0.66	0.7	0.63	0.49	0.663333	0.61	0.7	0.32	0.63	up
chr12:7136124:7136178:-@chr12:7135189:7135373:-	C1RL,C1R	0.24	0.37	0.22	0.69	0.45	0.61	0.276667	0.583333	0.37	0.69	0.22	0.45	up
chr12:78708378:78708394:-@chr12:78707509:78707591:-@chr12:78704688:78706694:-	PPP1R12A	0.11	0.11	0.16	0.26	0.39	0.27	0.126667	0.306667	0.16	0.39	0.11	0.26	up
chr12:857283:857788:+@chr12:859000:859458:+@chr12:860148:860426:+	WNK1	0.29	0.18	0.24	0.39	0.42	0.35	0.236667	0.386667	0.29	0.42	0.18	0.35	up
chr12:92484651:92484877:-@chr12:92483520:92483651:-@chr12:92460371:92463265:-	SOCS2-AS1	0.37	0.58	0.51	0.74	0.6	0.77	0.486667	0.703333	0.58	0.77	0.37	0.6	up
chr12:99075437:99075648:-@chr12:99075074:99075354:-	GOLGA2P5	0.09	0.15	0.12	0.23	0.21	0.23	0.12	0.223333	0.15	0.23	0.09	0.21	up
chr13:110356381:110356472:-@chr13:110351369:110351425:-@chr13:110350878:110351042:-@chr13:110343040:110343611:-	ANKRD10	0.84	0.77	0.82	0.89	0.93	0.93	0.81	0.916667	0.84	0.93	0.77	0.89	up
chr13:110356381:110356472:-@chr13:110353824:110353887:-@chr13:110350878:110351042:-@chr13:110343040:110343611:-	ANKRD10	0.75	0.68	0.65	0.82	0.77	0.83	0.693333	0.806667	0.75	0.83	0.65	0.77	up
chr13:114027433:114027566:+@chr13:114028328:114028546:+	MIR548AR,CDC16	0.67	0.66	0.55	0.76	0.79	0.82	0.626667	0.79	0.67	0.82	0.55	0.76	up
chr13:26921989:26922252:-@chr13:26920893:26920939:-@chr13:26916633:26917293:-	MTIF3	0.32	0.19	0.26	0.38	0.4	0.48	0.256667	0.42	0.32	0.48	0.19	0.38	up
chr13:30089198:30090193:+@chr13:30091816:30091881:+@chr13:30093210:30093376:+	USPL1	0.07	0.09	0.07	0.15	0.1	0.3	0.0766667	0.183333	0.09	0.3	0.07	0.1	up
chr13:49499543:49499500|49499344:-@chr13:49469211:49469556:-	DLEU2,MIR15A	0.4	0.37	0.36	0.68	0.41	0.84	0.376667	0.643333	0.4	0.84	0.36	0.41	up
chr13:49540234:49540300:-@chr13:49516788:49516905:-@chr13:49498430:49499543:-	MIR16-1,DLEU2,MIR15A	0.19	0.31	0.29	0.33	0.41	0.48	0.263333	0.406667	0.31	0.48	0.19	0.33	up
chr13:75009812:75009636|75009621:-@chr13:75002251:75002403:-	COMMD6	0.38	0.18	0.27	0.43	0.42	0.43	0.276667	0.426667	0.38	0.43	0.18	0.42	up
chr13:75276315:75276678:+@chr13:75281291:75281320:+@chr13:75289298:75289415:+	LMO7	0.81	0.8	0.76	0.91	0.91	0.9	0.79	0.906667	0.81	0.91	0.76	0.9	up
chr14:18719977:18720126:+@chr14:18722244:18722354:+@chr14:18723625:18723772:+	DUXAP10	0.48	0.51	0.49	0.59	0.61	0.61	0.493333	0.603333	0.51	0.61	0.48	0.59	up
chr14:23684292:23684322:-@chr14:23683449:23684204:-	PSME2,MIR7703	0.32	0.37	0.34	0.66	0.48	0.47	0.343333	0.536667	0.37	0.66	0.32	0.47	up
chr14:23753645:23753592|23753538:-@chr14:23752455:23753197:-	CHMP4A,MDP1,,,TM9SF1,NEDD8-MDP1	0.44	0.28	0.48	0.69	0.58	0.51	0.4	0.593333	0.48	0.69	0.28	0.51	up
chr14:23981392:23981821:-@chr14:23981155:23981306:-@chr14:23979829:23980841:-	SDR39U1	0.77	0.77	0.81	0.91	0.88	0.96	0.783333	0.916667	0.81	0.96	0.77	0.88	up
chr14:26134456:26134599:-@chr14:26088726:26088827:-@chr14:26018992:26019189:-	NOVA1	0.2	0.08	0.16	0.31	0.23	0.31	0.146667	0.283333	0.2	0.31	0.08	0.23	up
chr14:30428212:30428100|30428077:-@chr14:30424316:30425283:-	LOC100506071	0.26	0.21	0.32	0.35	0.42	0.41	0.263333	0.393333	0.32	0.42	0.21	0.35	up
chr14:44690350:44690481:+@chr14:44692873:44693005:+@chr14:44693650:44693775:+	FANCM	0.77	0.84	0.79	0.89	0.91	0.91	0.8	0.903333	0.84	0.91	0.77	0.89	up
chr14:64264064:64264453:+@chr14:64265467:64265564:+@chr14:64267113:64267159:+	PLEKHG3	0.6	0.55	0.56	0.67	0.69	0.72	0.57	0.693333	0.6	0.72	0.55	0.67	up
chr14:74607011:74607852:+@chr14:74610027:74610091:+@chr14:74613988:74614552:+	ZC2HC1C	0.24	0.08	0.13	0.31	0.35	0.5	0.15	0.386667	0.24	0.5	0.08	0.31	up
chr14:75558423:75558490:+@chr14:75568051:75568200:+@chr14:75594738:75595386:+	IFT43	0.12	0.1	0.13	0.38	0.19	0.33	0.116667	0.3	0.13	0.38	0.1	0.19	up
chr14:75618391:75618463:+@chr14:75618713:75618788:+	IFT43	0.09	0.13	0.13	0.2	0.21	0.27	0.116667	0.226667	0.13	0.27	0.09	0.2	up
chr14:91632771:91632935:-@chr14:91632190:91632234:-@chr14:91624827:91624914:-@chr14:91619223:91619355:-	ATXN3	0.47	0.4	0.43	0.6	0.49	0.55	0.433333	0.546667	0.47	0.6	0.4	0.49	up
chr14:93632916:93633064:+@chr14:93633594:93633777:+@chr14:93636838:93638813:+	IFI27L1	0.7	0.81	0.85	0.94	0.93	0.91	0.786667	0.926667	0.85	0.94	0.7	0.91	up
chr15:27799854:27800204:-@chr15:27799273:27799512:-@chr15:27797762:27798634:-	TJP1	0.53	0.52	0.58	0.74	0.7	0.7	0.543333	0.713333	0.58	0.74	0.52	0.7	up
chr15:29047415:29048073:-@chr15:29045370:29045535:-@chr15:29040376:29040568:-	MTMR10	0.33	0.16	0.17	0.4	0.46	0.44	0.22	0.433333	0.33	0.46	0.16	0.4	up
chr15:41872280:41872573:+@chr15:41878359:41878597:+@chr15:41879109:41879767:+	SERF2,HYPK	0.33	0.48	0.45	0.49	0.6	0.56	0.42	0.55	0.48	0.6	0.33	0.49	up
chr15:41872280:41872573:+@chr15:41878359|41878434:41878597:+	SERF2,HYPK	0.66	0.45	0.39	0.73	0.73	0.84	0.5	0.766667	0.66	0.84	0.39	0.73	up
chr15:42685515:42685645:-@chr15:42683595:42683687:-@chr15:42679756:42680122:-	SPG11	0.1	0.12	0.17	0.25	0.21	0.28	0.13	0.246667	0.17	0.28	0.1	0.21	up
chr15:43251808:43251639|43251637:-@chr15:43249841:43251492:-	SHF	0.53	0.38	0.49	0.86	0.66	0.76	0.466667	0.76	0.53	0.86	0.38	0.66	up
chr15:43666614:43667015:+@chr15:43682590:43682677:+@chr15:43684918:43685600:+	BLOC1S6	0.7	0.73	0.7	0.85	0.8	0.79	0.71	0.813333	0.73	0.85	0.7	0.79	up
chr15:43666614:43667015:+@chr15:43682594:43682677:+@chr15:43684918:43685600:+	BLOC1S6	0.35	0.53	0.41	0.65	0.55	0.63	0.43	0.61	0.53	0.65	0.35	0.55	up
chr15:57736897:57737029:-@chr15:57736306:57736524:-@chr15:57732370:57732466:-@chr15:57731002:57731817:-	GTF2A2	0.35	0.18	0.36	0.37	0.53	0.41	0.296667	0.436667	0.36	0.53	0.18	0.37	up
chr15:68757492:68757599:-@chr15:68756501:68756533:-@chr15:68755700:68755984:-	UACA	0.75	0.77	0.62	0.91	0.81	0.79	0.713333	0.836667	0.77	0.91	0.62	0.79	up
chr15:70039296:70039491:-@chr15:70031172:70031291:-@chr15:70018158:70018322:-	MYO9A	0.38	0.52	0.35	0.56	0.74	0.53	0.416667	0.61	0.52	0.74	0.35	0.53	up
chr15:72917660:72917738:-@chr15:72917546:72917567:-@chr15:72916172:72917192:-	ULK3	0.26	0.2	0.26	0.34	0.29	0.43	0.24	0.353333	0.26	0.43	0.2	0.29	up
chr15:73107560:73107847:+@chr15:73123780:73123908:+@chr15:73127947:73128115:+	PPCDC	0.81	0.73	0.79	0.9	0.87	0.88	0.776667	0.883333	0.81	0.9	0.73	0.87	up
chr15:73107560:73107847:+@chr15:73123780:73124105:+@chr15:73127947:73128115:+	PPCDC	0.3	0.24	0.22	0.47	0.39	0.48	0.253333	0.446667	0.3	0.48	0.22	0.39	up
chr15:73278261:73278555:+@chr15:73281355:73281453:+@chr15:73285393:73288218:+	C15orf39	0.52	0.5	0.53	0.71	0.56	0.68	0.516667	0.65	0.53	0.71	0.5	0.56	up
chr15:73426344:73426867:+@chr15:73427353:73427420:+@chr15:73428278:73429055:+	NEIL1	0.28	0.12	0.24	0.34	0.52	0.32	0.213333	0.393333	0.28	0.52	0.12	0.32	up
chr15:76236305:76236559:+@chr15:76236945:76237028:+	IDH3A	0.22	0.16	0.22	0.51	0.44	0.23	0.2	0.393333	0.22	0.51	0.16	0.23	up
chr15:80556590:80556778:-@chr15:80556457:80556494:-@chr15:80556229:80556319:-		0.31	0.25	0.2	0.34	0.43	0.33	0.253333	0.366667	0.31	0.43	0.2	0.33	up
chr15:89284540:89284707:+@chr15:89286671|89287146:89287316:+	UNC45A	0.74	0.64	0.74	0.85	0.81	0.88	0.706667	0.846667	0.74	0.88	0.64	0.81	up
chr15:89313758:89313857:-@chr15:89313313:89313354:-@chr15:89310272:89311436:-	PRC1	0.12	0.13	0.1	0.19	0.23	0.29	0.116667	0.236667	0.13	0.29	0.1	0.19	up
chr16:10388736:10388852:+@chr16:10430226:10430374:+@chr16:10431969:10432813:+	ATF7IP2	0.62	0.72	0.61	0.78	0.75	0.82	0.65	0.783333	0.72	0.82	0.61	0.75	up
chr16:10763115:10763217:+@chr16:10769307:10769394:+@chr16:10770405:10770711:+	NUBP1	0.5	0.46	0.71	0.72	0.76	0.77	0.556667	0.75	0.71	0.77	0.46	0.72	up
chr16:1201947:1202139:+@chr16:1202512:1202529:+@chr16:1203781:1203932:+	CACNA1H	0.52	0.56	0.45	0.81	0.65	0.69	0.51	0.716667	0.56	0.81	0.45	0.65	up
chr16:21438650:21439277:-@chr16:21406400:21406438:-@chr16:21403194:21403357:-	MIR3680-1,,SMG1P3	0.68	0.52	0.54	0.74	0.82	0.69	0.58	0.75	0.68	0.82	0.52	0.69	up
chr16:22293053:22293728:-@chr16:22283654:22283836:-@chr16:22268523:22268671:-	CDR2,LOC101060399	0.78	0.75	0.79	0.86	0.92	0.87	0.773333	0.883333	0.79	0.92	0.75	0.86	up
chr16:24860809:24860965:-@chr16:24858186:24858419:-@chr16:24854292:24854461:-	ARHGAP17	0.19	0.25	0.23	0.65	0.62	0.55	0.223333	0.606667	0.25	0.65	0.19	0.55	up
chr16:27232732:27232842:+@chr16:27248888:27249020:+@chr16:27259008:27259095:+	IL4R	0.52	0.56	0.41	0.58	0.81	0.57	0.496667	0.653333	0.56	0.81	0.41	0.57	up
chr16:28130188:28130756:-@chr16:28127877|28127944:28127809:-	XPO6	0.26	0.31	0.33	0.38	0.39	0.49	0.3	0.42	0.33	0.49	0.26	0.38	up
chr16:29378695:29378807:+@chr16:29380173|29380204:29380355:+	SULT1A4,LOC105369243,SLX1B-SULT1A4	0.07	0.08	0.1	0.3	0.17	0.13	0.0833333	0.2	0.1	0.3	0.07	0.13	up
chr16:29919751:29919862:+@chr16:29920287:29920352:+@chr16:29924043:29925105:+	INO80E	0.26	0.29	0.26	0.44	0.37	0.32	0.27	0.376667	0.29	0.44	0.26	0.32	up
chr16:30491057:30491233:+@chr16:30500546:30500970:+@chr16:30501352:30502667:+		0.14	0.21	0.17	0.28	0.31	0.27	0.173333	0.286667	0.21	0.31	0.14	0.27	up
chr16:30569523:30569628:+@chr16:30569815:30569949:+@chr16:30570418:30570786:+	PRR14	0.32	0.34	0.28	0.65	0.45	0.47	0.313333	0.523333	0.34	0.65	0.28	0.45	up
chr16:30679106:30679490:-@chr16:30678266|30678546:30678164:-	CCDC189	0.49	0.51	0.42	0.69	0.6	0.59	0.473333	0.626667	0.51	0.69	0.42	0.59	up
chr16:51118:51279:-@chr16:50437:50537:-	RHBDF1	0.45	0.38	0.28	0.48	0.47	0.56	0.37	0.503333	0.45	0.56	0.28	0.47	up
chr16:569070:569181:+@chr16:570184|570859:570973:+	PIGQ	0.6	0.47	0.33	0.62	0.75	0.74	0.466667	0.703333	0.6	0.75	0.33	0.62	up
chr16:57263501:57263648:-@chr16:57262450:57262649:-@chr16:57261518:57261572:-	SLC38A7	0.68	0.72	0.58	0.73	0.83	0.76	0.66	0.773333	0.72	0.83	0.58	0.73	up
chr16:643747:643804:+@chr16:645030:645148:+	WDR90,MSLN	0.21	0.26	0.16	0.56	0.33	0.45	0.21	0.446667	0.26	0.56	0.16	0.33	up
chr16:65157794:65157998:+@chr16:65168533:65168606:+@chr16:65170251:65170539:+	CKLF,CKLF-CMTM1,CMTM1	0.42	0.22	0.34	0.56	0.46	0.52	0.326667	0.513333	0.42	0.56	0.22	0.46	up
chr16:65774666:65775444:-@chr16:65772962:65773101:-@chr16:65771445:65772070:-	KIAA0895L	0.47	0.39	0.47	0.57	0.61	0.53	0.443333	0.57	0.47	0.61	0.39	0.53	up
chr16:65774666:65775444:-@chr16:65772994:65773101:-@chr16:65771445:65772070:-	KIAA0895L	0.3	0.26	0.27	0.39	0.44	0.33	0.276667	0.386667	0.3	0.44	0.26	0.33	up
chr16:65774666:65775444:-@chr16:65773010:65773101:-@chr16:65771445:65772070:-	KIAA0895L	0.34	0.28	0.24	0.37	0.5	0.36	0.286667	0.41	0.34	0.5	0.24	0.36	up
chr16:66782172:66783179:+@chr16:66805733:66805836:+@chr16:66812600:66812688:+@chr16:66817754:66821699:+	NFATC3	0.46	0.49	0.35	0.53	0.62	0.53	0.433333	0.56	0.49	0.62	0.35	0.53	up
chr16:70075993:70076152:-@chr16:70073486:70073547:-@chr16:70069632:70070409:-	ZNF19	0.65	0.73	0.46	0.79	0.95	0.81	0.613333	0.85	0.73	0.95	0.46	0.79	up
chr16:70459441:70459316|70459297:-@chr16:70456280:70456452:-	ZNF821	0.51	0.52	0.4	0.57	0.56	0.62	0.476667	0.583333	0.52	0.62	0.4	0.56	up
chr16:729644:730974:-@chr16:727499:727696:-@chr16:726995:727330:-	NARFL	0.12	0.1	0.13	0.16	0.24	0.28	0.116667	0.226667	0.13	0.28	0.1	0.16	up
chr16:84204323:84204505:+@chr16:84225021:84225239:+@chr16:84239659:84239858:+	GSE1	0.5	0.44	0.37	0.6	0.63	0.65	0.436667	0.626667	0.5	0.65	0.37	0.6	up
chr16:87251345:87251938:-@chr16:87250704:87250766:-@chr16:87250014:87250470:-	MVD	0.1	0.11	0.12	0.28	0.21	0.29	0.11	0.26	0.12	0.29	0.1	0.21	up
chr16:87265722:87266031:+@chr16:87267513:87267668:+@chr16:87269448:87270813:+	SNAI3-AS1	0.75	0.82	0.66	0.85	0.87	0.85	0.743333	0.856667	0.82	0.87	0.66	0.85	up
chr16:87706001:87706155:+@chr16:87708248:87708396:+@chr16:87714710:87714822:+	ACSF3	0.67	0.73	0.62	0.8	0.75	0.79	0.673333	0.78	0.73	0.8	0.62	0.75	up
chr16:88304495:88304919:-@chr16:88303815|88303818:88303686:-	VPS9D1	0.36	0.32	0.33	0.44	0.47	0.52	0.336667	0.476667	0.36	0.52	0.32	0.44	up
chr16:88393075:88393141:-@chr16:88392860:88392988:-	FANCA	0.09	0.17	0.16	0.2	0.18	0.36	0.14	0.246667	0.17	0.36	0.09	0.18	up
chr17:1566174:1566316:-@chr17:1564415:1564497:-@chr17:1561548:1564058:-	MIR22HG,MIR22	0.57	0.54	0.55	0.65	0.6	0.81	0.553333	0.686667	0.57	0.81	0.54	0.6	up
chr17:15935902:15936097:-@chr17:15931211:15931384:-@chr17:15930321:15930481:-	NCOR1	0.39	0.46	0.36	0.48	0.54	0.54	0.403333	0.52	0.46	0.54	0.36	0.48	up
chr17:16412991:16413250:-@chr17:16412082:16412153:-@chr17:16411368:16411968:-	ZNF287	0.09	0.14	0.06	0.16	0.2	0.24	0.0966667	0.2	0.14	0.24	0.06	0.16	up
chr17:17017955:17018114:+@chr17:17019332:17019451:+@chr17:17020465:17020551:+	MPRIP	0.85	0.84	0.8	0.95	0.95	0.9	0.83	0.933333	0.85	0.95	0.8	0.9	up
chr17:17024042:17024127:+@chr17:17024646:17024708:+@chr17:17028862:17030149:+	MPRIP	0.36	0.36	0.37	0.57	0.54	0.55	0.363333	0.553333	0.37	0.57	0.36	0.54	up
chr17:19514953:19515861:+@chr17:19517056|19517112:19517180:+	ALDH3A2	0.61	0.75	0.82	0.9	0.84	0.86	0.726667	0.866667	0.82	0.9	0.61	0.84	up
chr17:19592164:19592338:-@chr17:19588873:19589039:-@chr17:19586450:19587368:-	ALDH3A1	0.67	0.55	0.36	0.69	0.87	0.79	0.526667	0.783333	0.67	0.87	0.36	0.69	up
chr17:23949655:23949780:-@chr17:23943619|23943622:23943127:-	SPAG5	0.38	0.29	0.29	0.39	0.45	0.48	0.32	0.44	0.38	0.48	0.29	0.39	up
chr17:2443673:2444050:+@chr17:2463702:2463906:+@chr17:2485427:2485554:+@chr17:2488143:2488692:+	PAFAH1B1	0.1	0.11	0.15	0.2	0.2	0.28	0.12	0.226667	0.15	0.28	0.1	0.2	up
chr17:30783320:30783681:-@chr17:30781724|30781745:30781603:-	SLFN12	0.53	0.67	0.48	0.72	0.77	0.76	0.56	0.75	0.67	0.77	0.48	0.72	up
chr17:35445895:35445967:-@chr17:35445501:35445597:-@chr17:35444896:35445128:-	MED24,MIR6884	0.69	0.73	0.82	0.84	0.93	0.89	0.746667	0.886667	0.82	0.93	0.69	0.84	up
chr17:35587274:35588159:+@chr17:35591077:35591264:+@chr17:35591394:35591472:+	RAPGEFL1	0.15	0.14	0.15	0.41	0.51	0.24	0.146667	0.386667	0.15	0.51	0.14	0.24	up
chr17:37099556:37099723|37099719:+@chr17:37099869:37099967:+	EIF1	0.53	0.5	0.33	0.64	0.56	0.63	0.453333	0.61	0.53	0.64	0.33	0.56	up
chr17:37427089:37427215:+@chr17:37427943:37428016:+@chr17:37429198:37431189:+	NKIRAS2	0.32	0.46	0.41	0.48	0.58	0.57	0.396667	0.543333	0.46	0.58	0.32	0.48	up
chr17:38385589:38386427:-@chr17:38385093:38385206:-@chr17:38384921:38384987:-	PTGES3L-AARSD1	0.43	0.21	0.44	0.47	0.59	0.46	0.36	0.506667	0.44	0.59	0.21	0.46	up
chr17:38536751:38536813:+@chr17:38538499:38538680:+@chr17:38544200:38545875:+	NBR2	0.18	0.27	0.13	0.29	0.37	0.34	0.193333	0.333333	0.27	0.37	0.13	0.29	up
chr17:39507574:39507664:+@chr17:39507863|39508204:39508345:+	G6PC3	0.2	0.16	0.2	0.28	0.33	0.29	0.186667	0.3	0.2	0.33	0.16	0.28	up
chr17:39897366:39898829:-@chr17:39871565:39871609:-@chr17:39869372:39869439:-	GPATCH8	0.29	0.13	0.2	0.62	0.37	0.35	0.206667	0.446667	0.29	0.62	0.13	0.35	up
chr17:42106959:42107158|42107006:+@chr17:42125453:42125618:+	NSF	0.71	0.51	0.71	0.75	0.79	0.86	0.643333	0.8	0.71	0.86	0.51	0.75	up
chr17:45425953:45425763|45425759:-@chr17:45422368:45424227:-	DLX3	0.15	0.17	0.09	0.18	0.37	0.34	0.136667	0.296667	0.17	0.37	0.09	0.18	up
chr17:45892958:45893232:+@chr17:45893602:45893730:+@chr17:45893993:45894046:+	ACSF2	0.75	0.83	0.88	0.95	0.93	0.96	0.82	0.946667	0.88	0.96	0.75	0.93	up
chr17:46409468:46409581:-@chr17:46408223:46408261:-@chr17:46407131:46407307:-	SPAG9	0.04	0.03	0.05	0.26	0.2	0.19	0.04	0.216667	0.05	0.26	0.03	0.19	up
chr17:4952945:4953887:-@chr17:4950525|4950552:4949753:-	ZNF232	0.44	0.43	0.31	0.49	0.75	0.6	0.393333	0.613333	0.44	0.75	0.31	0.49	up
chr17:4955095:4955238:-@chr17:4953787|4953887:4953413:-	ZNF232	0.68	0.61	0.8	0.92	0.85	0.87	0.696667	0.88	0.8	0.92	0.61	0.85	up
chr17:50333051:50333283:+@chr17:50337849:50337927:+@chr17:50345026:50345175:+	TOM1L1	0.59	0.6	0.57	0.65	0.66	0.76	0.586667	0.69	0.6	0.76	0.57	0.65	up
chr17:5325145:5325433:-@chr17:5324431:5324503:-@chr17:5324098:5324188:-	DERL2	0.38	0.25	0.23	0.88	0.8	0.86	0.286667	0.846667	0.38	0.88	0.23	0.8	up
chr17:5325145:5325433:-@chr17:5324431:5324587:-@chr17:5324098:5324188:-	DERL2	0.77	0.75	0.59	0.97	0.97	0.97	0.703333	0.97	0.77	0.97	0.59	0.97	up
chr17:54444471:54444589:-@chr17:54433741:54433857:-@chr17:54430343:54431602:-	TRIM37	0.67	0.77	0.67	0.91	0.86	0.95	0.703333	0.906667	0.77	0.95	0.67	0.86	up
chr17:59326823:59327701:-@chr17:59326638:59326729:-@chr17:59325999:59326311:-	CSH1,CSHL1	0.33	0.31	0.45	0.54	0.52	0.5	0.363333	0.52	0.45	0.54	0.31	0.5	up
chr17:59437723:59438025:-@chr17:59437470:59437585:-@chr17:59434955:59436465:-	ICAM2	0.2	0.27	0.16	0.29	0.39	0.31	0.21	0.33	0.27	0.39	0.16	0.29	up
chr17:60207561:60207619:-@chr17:60206923:60207044:-	LOC146880	0.64	0.8	0.68	0.85	0.87	0.83	0.706667	0.85	0.8	0.87	0.64	0.83	up
chr17:6602132:6602267:+@chr17:6603299|6603729:6603761:+	XAF1	0.22	0.51	0.51	0.59	0.55	0.66	0.413333	0.6	0.51	0.66	0.22	0.55	up
chr17:6602132:6602267:+@chr17:6604449:6604644:+@chr17:6606198:6606283:+	XAF1	0.51	0.73	0.66	0.8	0.76	0.78	0.633333	0.78	0.73	0.8	0.51	0.76	up
chr17:70283356:70283985:-@chr17:70281727:70281789:-@chr17:70281600:70281673:-@chr17:70280330:70281419:-	NAT9	0.56	0.48	0.61	0.77	0.63	0.68	0.55	0.693333	0.61	0.77	0.48	0.63	up
chr17:70797030:70797638:-@chr17:70796178:70796267:-@chr17:70794309:70794478:-	SLC25A19	0.38	0.43	0.55	0.56	0.62	0.57	0.453333	0.583333	0.55	0.62	0.38	0.56	up
chr17:71587931:71588794|71588100:+@chr17:71588954:71589078:+	ZACN	0.23	0.14	0.15	0.37	0.48	0.59	0.173333	0.48	0.23	0.59	0.14	0.37	up
chr17:71602090:71602257:-@chr17:71598819:71598911:-@chr17:71598001:71598073:-	EXOC7	0.52	0.41	0.46	0.81	0.71	0.81	0.463333	0.776667	0.52	0.81	0.41	0.71	up
chr17:71893127:71893330:+@chr17:71893661:71893813:+	SPHK1	0.17	0.17	0.22	0.31	0.27	0.39	0.186667	0.323333	0.22	0.39	0.17	0.27	up
chr17:7237510:7237552:-@chr17:7236995|7237021:7236834:-	PLSCR3	0.16	0.15	0.1	0.33	0.21	0.21	0.136667	0.25	0.16	0.33	0.1	0.21	up
chr17:7238147:7238777:-@chr17:7237525|7237552:7237510:-	PLSCR3	0.75	0.74	0.66	0.86	0.89	0.87	0.716667	0.873333	0.75	0.89	0.66	0.86	up
chr17:72958208:72958463:+@chr17:72959044:72959205:+@chr17:72989821:72991805:+	SEPT9	0.04	0.03	0.06	0.22	0.15	0.22	0.0433333	0.196667	0.06	0.22	0.03	0.15	up
chr17:72959044:72959205:+@chr17:72961567:72961673:+@chr17:72989821:72991805:+	SEPT9	0.07	0.06	0.11	0.19	0.19	0.24	0.08	0.206667	0.11	0.24	0.06	0.19	up
chr17:7414398:7414535:+@chr17:7414723:7414806:+@chr17:7415415:7416011:+	SENP3	0.69	0.55	0.66	0.79	0.77	0.81	0.633333	0.79	0.69	0.81	0.55	0.77	up
chr17:7430734:7430880:+@chr17:7431203:7431313:+	MPDU1	0.1	0.08	0.06	0.32	0.28	0.2	0.08	0.266667	0.1	0.32	0.06	0.2	up
chr17:76003543:76004216:+@chr17:76006176:76006340:+@chr17:76010535:76010640:+@chr17:76011915:76012211:+	MIR4730,ENDOV	0.3	0.24	0.36	0.38	0.48	0.56	0.3	0.473333	0.36	0.56	0.24	0.38	up
chr17:77142973:77143075:-@chr17:77141391:77141449:-@chr17:77138032:77138099:-@chr17:77134356:77136886:-	NPLOC4	0.7	0.65	0.72	0.78	0.81	0.82	0.69	0.803333	0.72	0.82	0.65	0.78	up
chr17:77260448:77260561:-@chr17:77259469:77260110:-	ARL16	0.21	0.24	0.2	0.38	0.41	0.32	0.216667	0.37	0.24	0.41	0.2	0.32	up
chr17:77465782:77465870:-@chr17:77465462:77465698:-	SIRT7	0.49	0.54	0.36	0.58	0.7	0.66	0.463333	0.646667	0.54	0.7	0.36	0.58	up
chr17:7778508:7779188:+@chr17:7780281|7780409:7780525:+	CNTROB	0.2	0.22	0.22	0.43	0.27	0.34	0.213333	0.346667	0.22	0.43	0.2	0.27	up
chr17:8051410:8051219|8050783:-@chr17:8050534:8050682:-	AURKB	0.5	0.48	0.48	0.62	0.53	0.77	0.486667	0.64	0.5	0.77	0.48	0.53	up
chr18:12689829:12689904:-@chr18:12689164|12689202:12688978:-	CEP76	0.69	0.75	0.75	0.89	0.82	0.87	0.73	0.86	0.75	0.89	0.69	0.82	up
chr18:13104129:13104250:+@chr18:13106373|13106376:13106502:+	CEP192	0.5	0.33	0.5	0.55	0.56	0.64	0.443333	0.583333	0.5	0.64	0.33	0.55	up
chr18:33087728:33087942:-@chr18:33081147:33081231:-@chr18:33077001:33079158:-	CELF4	0.07	0.11	0.09	0.2	0.14	0.24	0.09	0.193333	0.11	0.24	0.07	0.14	up
chr18:3584418:3584482:+@chr18:3586577:3586673:+@chr18:3587174:3587806:+		0.21	0.45	0.37	0.69	0.62	0.5	0.343333	0.603333	0.45	0.69	0.21	0.5	up
chr18:45272201:45272114|45272104:-@chr18:45271398:45271952:-	RPL17,SNORD58A,,RPL17,RPL17-C18orf32	0.53	0.73	0.68	0.76	0.79	0.81	0.646667	0.786667	0.73	0.81	0.53	0.76	up
chr18:57890886:57890938:-@chr18:57890534:57890578:-@chr18:57862041:57864192:-	PIGN	0.09	0.14	0.13	0.22	0.21	0.3	0.12	0.243333	0.14	0.3	0.09	0.21	up
chr18:58100519:58100657:+@chr18:58102452:58102574:+@chr18:58103662:58104186:+	KIAA1468	0.32	0.22	0.29	0.37	0.37	0.6	0.276667	0.446667	0.32	0.6	0.22	0.37	up
chr18:75347236:75347925|75347618:+@chr18:75388516:75390313:+	NFATC1	0.58	0.24	0.21	0.65	0.73	0.69	0.343333	0.69	0.58	0.73	0.21	0.65	up
chr18:75811712:75812018:-@chr18:75810624|75810643:75810507:-	PQLC1	0.46	0.34	0.45	0.6	0.47	0.63	0.416667	0.566667	0.46	0.63	0.34	0.47	up
chr18:76006799:76007128:+@chr18:76021390:76021477:+@chr18:76027693:76030603:+		0.6	0.63	0.65	0.66	0.79	0.74	0.626667	0.73	0.65	0.79	0.6	0.66	up
chr19:13088245:13087960|13087920:-@chr19:13087093:13087280:-	TRMT1	0.07	0.16	0.19	0.25	0.34	0.2	0.14	0.263333	0.19	0.34	0.07	0.2	up
chr19:16120534:16120610:+@chr19:16123260:16123388:+@chr19:16124362:16125018:+	HSH2D	0.32	0.18	0.29	0.33	0.43	0.56	0.263333	0.44	0.32	0.56	0.18	0.33	up
chr19:18743252:18743356:+@chr19:18746710:18746796:+@chr19:18747451:18747631:+	CRTC1	0.83	0.78	0.56	0.89	0.88	0.86	0.723333	0.876667	0.83	0.89	0.56	0.86	up
chr19:2049286:2049337|2049333:+@chr19:2049435:2050588:+	IZUMO4	0.19	0.26	0.26	0.28	0.42	0.65	0.236667	0.45	0.26	0.65	0.19	0.28	up
chr19:21008102:21008228:+@chr19:21008732|21008735:21008830:+	ZNF430	0.55	0.62	0.5	0.71	0.87	0.77	0.556667	0.783333	0.62	0.87	0.5	0.71	up
chr19:23248718:23248890:-@chr19:23244860:23244934:-@chr19:23232815:23236386:-		0.21	0.32	0.24	0.42	0.47	0.45	0.256667	0.446667	0.32	0.47	0.21	0.42	up
chr19:24008048:24008263:+@chr19:24010895:24011024:+@chr19:24011388:24011960:+	ZNF254	0.33	0.24	0.3	0.5	0.59	0.5	0.29	0.53	0.33	0.59	0.24	0.5	up
chr19:3403480:3403664:+@chr19:3404761:3404914:+@chr19:3407548:3407633:+	NFIC	0.52	0.34	0.48	0.58	0.53	0.54	0.446667	0.55	0.52	0.58	0.34	0.53	up
chr19:35124497:35125411:+@chr19:35153940:35153974:+@chr19:35167970:35168048:+	URI1	0.53	0.52	0.43	0.61	0.71	0.6	0.493333	0.64	0.53	0.71	0.43	0.6	up
chr19:37528339:37528529:+@chr19:37529991:37530084:+@chr19:37535575:37537703:+	ZNF507	0.68	0.6	0.68	0.72	0.74	0.83	0.653333	0.763333	0.68	0.83	0.6	0.72	up
chr19:38155930:38156048:+@chr19:38156172|38156230:38156308:+	FAAP24	0.73	0.72	0.54	0.8	0.83	0.82	0.663333	0.816667	0.73	0.83	0.54	0.8	up
chr19:40224466:40224616:+@chr19:40225052:40225266:+	HPN	0.47	0.37	0.33	0.6	0.49	0.6	0.39	0.563333	0.47	0.6	0.33	0.49	up
chr19:40441688:40441807:+@chr19:40444668:40444724:+@chr19:40445239:40445435:+@chr19:40449102:40449275:+	LSR	0.61	0.64	0.56	0.91	0.85	0.9	0.603333	0.886667	0.64	0.91	0.56	0.85	up
chr19:40441688:40441807:+@chr19:40445239:40445435:+@chr19:40449102:40449275:+	LSR	0.12	0.11	0.11	0.29	0.31	0.32	0.113333	0.306667	0.12	0.32	0.11	0.29	up
chr19:40441688:40441807:+@chr19:40445289:40445435:+@chr19:40449102:40449275:+	LSR	0.24	0.24	0.24	0.53	0.52	0.55	0.24	0.533333	0.24	0.55	0.24	0.52	up
chr19:40441688:40441807:+@chr19:40445289:40445439:+@chr19:40449102:40449275:+	LSR	0.13	0.13	0.13	0.32	0.32	0.35	0.13	0.33	0.13	0.35	0.13	0.32	up
chr19:40923121:40923337:-@chr19:40922510|40922827:40922451:-	IGFLR1	0.22	0.25	0.3	0.56	0.39	0.54	0.256667	0.496667	0.3	0.56	0.22	0.39	up
chr19:40923121:40923337:-@chr19:40922510|40922829:40922451:-	IGFLR1	0.34	0.35	0.33	0.66	0.5	0.65	0.34	0.603333	0.35	0.66	0.33	0.5	up
chr19:41193636:41193819:-@chr19:41193309:41193387:-	ALKBH6	0.48	0.51	0.58	0.75	0.66	0.62	0.523333	0.676667	0.58	0.75	0.48	0.62	up
chr19:41193636:41193819:-@chr19:41193387|41193425:41193309:-	ALKBH6	0.65	0.73	0.73	0.85	0.81	0.82	0.703333	0.826667	0.73	0.85	0.65	0.81	up
chr19:41408696:41408863|41408815:+@chr19:41411490:41412441:+	ZNF146	0.34	0.31	0.44	0.45	0.56	0.45	0.363333	0.486667	0.44	0.56	0.31	0.45	up
chr19:42400372:42401016:+@chr19:42402341|42402430:42402491:+		0.2	0.32	0.31	0.4	0.72	0.57	0.276667	0.563333	0.32	0.72	0.2	0.4	up
chr19:42528070:42529234:+@chr19:42529932|42529949:42530058:+	HKR1	0.62	0.52	0.65	0.7	0.75	0.72	0.596667	0.723333	0.65	0.75	0.52	0.7	up
chr19:4397829:4397917:-@chr19:4397497:4397716:-	UBXN6	0.21	0.17	0.21	0.28	0.22	0.61	0.196667	0.37	0.21	0.61	0.17	0.22	up
chr19:44075894:44077642:-@chr19:44074274:44074446:-@chr19:44073045:44073142:-@chr19:44071567:44072624:-	SIRT2	0.38	0.31	0.38	0.54	0.5	0.49	0.356667	0.51	0.38	0.54	0.31	0.49	up
chr19:47717259:47717797:-@chr19:47712765:47712857:-@chr19:47711003:47711095:-@chr19:47708342:47708471:-	CEACAM1	0.26	0.37	0.25	0.4	0.41	0.52	0.293333	0.443333	0.37	0.52	0.25	0.4	up
chr19:49023768:49023973|49023932:+@chr19:49024194:49024273:+	ZNF283	0.3	0.32	0.22	0.45	0.57	0.37	0.28	0.463333	0.32	0.57	0.22	0.37	up
chr19:49361579:49361800:+@chr19:49366028|49366041:49366088:+	ZNF226	0.71	0.7	0.68	0.74	0.86	0.81	0.696667	0.803333	0.71	0.86	0.68	0.74	up
chr19:52627514:52627236|52627157:-@chr19:52623087:52625534:-	SLC8A2	0.23	0.11	0.28	0.3	0.33	0.48	0.206667	0.37	0.28	0.48	0.11	0.3	up
chr19:52709912:52710309:-@chr19:52695702:52695818:-@chr19:52690619:52691983:-	NAPA	0.73	0.55	0.51	0.76	0.78	0.81	0.596667	0.783333	0.73	0.81	0.51	0.76	up
chr19:53305556:53306519:-@chr19:53303853:53303970:-@chr19:53301591:53301630:-	PLA2G4C	0.31	0.14	0.21	0.4	0.34	0.38	0.22	0.373333	0.31	0.4	0.14	0.34	up
chr19:54656688:54657105|54656869:+@chr19:54657639:54657824:+	ALDH16A1	0.83	0.67	0.85	0.9	0.89	0.89	0.783333	0.893333	0.85	0.9	0.67	0.89	up
chr19:54861754:54861868:+@chr19:54862091:54862230:+@chr19:54863920:54864006:+	BCL2L12	0.66	0.74	0.77	0.79	0.9	0.92	0.723333	0.87	0.77	0.92	0.66	0.79	up
chr19:55573218:55573489:+@chr19:55573591:55573865:+	NR1H2	0.61	0.46	0.57	0.63	0.72	0.63	0.546667	0.66	0.61	0.72	0.46	0.63	up
chr19:55999641:56000043:-@chr19:55998622:55998943:-@chr19:55997523:55997683:-	C19orf48	0.71	0.75	0.67	0.89	0.82	0.79	0.71	0.833333	0.75	0.89	0.67	0.79	up
chr19:59301930:59302097|59302089:+@chr19:59303559:59303845:+	NDUFA3	0.22	0.29	0.24	0.47	0.56	0.39	0.25	0.473333	0.29	0.56	0.22	0.39	up
chr19:60679511:60679986:+@chr19:60683013:60683096:+@chr19:60684380:60687666:+	ZNF628	0.12	0.07	0.15	0.25	0.21	0.21	0.113333	0.223333	0.15	0.25	0.07	0.21	up
chr19:62953965:62954091:+@chr19:62956471:62956559:+@chr19:62960052:62960489:+	ZNF776	0.24	0.47	0.37	0.51	0.65	0.8	0.36	0.653333	0.47	0.8	0.24	0.51	up
chr19:6417477:6417620:+@chr19:6417962:6418232:+	CRB3	0.55	0.53	0.43	0.63	0.67	0.66	0.503333	0.653333	0.55	0.67	0.43	0.63	up
chr19:7874726:7874953:+@chr19:7876693:7876740:+@chr19:7880640:7880781:+	MAP2K7	0.14	0.12	0.12	0.26	0.27	0.23	0.126667	0.253333	0.14	0.27	0.12	0.23	up
chr19:8227833:8227961:+@chr19:8232572:8232728:+@chr19:8232814:8233318:+	CERS4	0.62	0.7	0.59	0.75	0.85	0.88	0.636667	0.826667	0.7	0.88	0.59	0.75	up
chr1:110265992:110266139:+@chr1:110267311:110267856:+@chr1:110268205:110268335:+	CSF1	0.52	0.51	0.71	0.72	0.79	0.75	0.58	0.753333	0.71	0.79	0.51	0.72	up
chr1:110265992:110266139:+@chr1:110267311|110268205:110268335:+	CSF1	0.58	0.58	0.7	0.73	0.84	0.79	0.62	0.786667	0.7	0.84	0.58	0.73	up
chr1:11728447:11728481:+@chr1:11728574:11728867:+@chr1:11730084:11730189:+	AGTRAP	0.08	0.09	0.04	0.33	0.2	0.11	0.07	0.213333	0.09	0.33	0.04	0.11	up
chr1:11728447:11728481:+@chr1:11728771:11728867:+@chr1:11730084:11730189:+	AGTRAP	0.11	0.22	0.16	0.52	0.4	0.25	0.163333	0.39	0.22	0.52	0.11	0.25	up
chr1:1249824:1249929:-@chr1:1248424:1248530:-@chr1:1246239:1246339:-@chr1:1240389:1240861:-	CPSF3L,MIR6727	0.38	0.43	0.46	0.5	0.7	0.54	0.423333	0.58	0.46	0.7	0.38	0.5	up
chr1:148521577:148521652:+@chr1:148522242|148522548:148522667:+	CIART	0.37	0.4	0.38	0.44	0.61	0.54	0.383333	0.53	0.4	0.61	0.37	0.44	up
chr1:149206977:149206920|149206916:-@chr1:149206482:149206814:-	CERS2	0.1	0.08	0.13	0.2	0.15	0.27	0.103333	0.206667	0.13	0.27	0.08	0.15	up
chr1:151784618:151784580|151784570:-@chr1:151783754:151783909:-	S100A4	0.38	0.34	0.28	0.72	0.67	0.77	0.333333	0.72	0.38	0.77	0.28	0.67	up
chr1:151784853:151784985:-@chr1:151784570:151784618:-@chr1:151783754:151783909:-	S100A4	0.04	0.04	0.04	0.15	0.16	0.14	0.04	0.15	0.04	0.16	0.04	0.14	up
chr1:153300515:153300589:+@chr1:153300676:153300746:+@chr1:153301345:153301469:+	ADAM15	0.18	0.17	0.16	0.53	0.31	0.26	0.17	0.366667	0.18	0.53	0.16	0.26	up
chr1:153301004:153301217|153301075:+@chr1:153301345:153301469:+	ADAM15	0.07	0.09	0.05	0.27	0.29	0.23	0.07	0.263333	0.09	0.29	0.05	0.23	up
chr1:154969793:154969936:+@chr1:154970425:154970468:+@chr1:154972141:154972325:+	RRNAD1	0.23	0.23	0.16	0.46	0.32	0.34	0.206667	0.373333	0.23	0.46	0.16	0.32	up
chr1:155175964:155176326:-@chr1:155174834:155174875:-@chr1:155173665:155173912:-	ARHGEF11	0.09	0.09	0.14	0.35	0.31	0.41	0.106667	0.356667	0.14	0.41	0.09	0.31	up
chr1:155175964:155176326:-@chr1:155174834:155174929:-@chr1:155173665:155173912:-	ARHGEF11	0.08	0.08	0.07	0.6	0.74	0.54	0.0766667	0.626667	0.08	0.74	0.07	0.54	up
chr1:159368965:159369195:-@chr1:159367229:159367257:-@chr1:159360552:159360940:-	DEDD	0.8	0.76	0.83	0.96	0.93	0.91	0.796667	0.933333	0.83	0.96	0.76	0.91	up
chr1:15957502:15957930:+@chr1:15963575|15963578:15963767:+	FBLIM1	0.35	0.13	0.28	0.49	0.44	0.76	0.253333	0.563333	0.35	0.76	0.13	0.44	up
chr1:161542647:161542743:-@chr1:161541617:161541727:-@chr1:161536633:161537105:-	RGS5	0.37	0.35	0.48	0.58	0.7	0.51	0.4	0.596667	0.48	0.7	0.35	0.51	up
chr1:170787275:170787389:+@chr1:170789023:170789133:+@chr1:170791632:170791786:+	SUCO	0.49	0.54	0.57	0.6	0.72	0.59	0.533333	0.636667	0.57	0.72	0.49	0.59	up
chr1:17143182:17143364:+@chr1:17144544:17144688:+	CROCC	0.07	0.12	0.05	0.22	0.26	0.2	0.08	0.226667	0.12	0.26	0.05	0.2	up
chr1:17196102:17196379:-@chr1:17195468:17195560:-@chr1:17195336:17195382:-	ATP13A2	0.45	0.73	0.74	0.77	0.75	0.76	0.64	0.76	0.74	0.77	0.45	0.75	up
chr1:177317496:177318145:+@chr1:177318477:177318811:+@chr1:177323669:177324221:+	TOR3A	0.33	0.44	0.36	0.71	0.46	0.54	0.376667	0.57	0.44	0.71	0.33	0.46	up
chr1:177317496:177318145:+@chr1:177318477|177318683:177318811:+	TOR3A	0.26	0.24	0.16	0.49	0.33	0.38	0.22	0.4	0.26	0.49	0.16	0.33	up
chr1:177317496:177318145:+@chr1:177318543:177318811:+@chr1:177323669:177324221:+	TOR3A	0.41	0.52	0.46	0.74	0.57	0.57	0.463333	0.626667	0.52	0.74	0.41	0.57	up
chr1:177317496:177318145:+@chr1:177318543|177318683:177318811:+	TOR3A	0.3	0.28	0.22	0.56	0.38	0.41	0.266667	0.45	0.3	0.56	0.22	0.38	up
chr1:17886655:17886829:+@chr1:17890202:17890274:+@chr1:17893686:17894079:+@chr1:17894240:17894362:+	ARHGEF10L	0.36	0.41	0.39	0.47	0.52	0.6	0.386667	0.53	0.41	0.6	0.36	0.47	up
chr1:1812119:1812409:-@chr1:1774451:1774596:-@chr1:1760489:1760537:-	GNB1	0.26	0.34	0.26	0.77	0.58	0.35	0.286667	0.566667	0.34	0.77	0.26	0.35	up
chr1:181977884:181978047:+@chr1:182042132:182042242:+@chr1:182083323:182083531:+	RGL1	0.65	0.66	0.55	0.82	0.76	0.8	0.62	0.793333	0.66	0.82	0.55	0.76	up
chr1:200199367:200199502|200199499:+@chr1:200201184:200201294:+	TIMM17A	0.38	0.42	0.51	0.55	0.6	0.55	0.436667	0.566667	0.51	0.6	0.38	0.55	up
chr1:202031374:202031526:+@chr1:202032202:202032247:+@chr1:202037326:202038767:+	ZBED6,ZC3H11A	0.17	0.19	0.2	0.3	0.25	0.36	0.186667	0.303333	0.2	0.36	0.17	0.25	up
chr1:202385454:202385713:-@chr1:202382393:202382515:-@chr1:202377066:202377208:-	ETNK2	0.83	0.66	0.65	0.89	0.93	0.85	0.713333	0.89	0.83	0.93	0.65	0.85	up
chr1:203656206:203656325:-@chr1:203620039:203620115:-@chr1:203617129:203617607:-	LEMD1	0.22	0.27	0.26	0.4	0.34	0.42	0.25	0.386667	0.27	0.42	0.22	0.34	up
chr1:206025587:206025650:+@chr1:206030221:206030313:+@chr1:206033487:206035484:+	CD46	0.36	0.32	0.32	0.5	0.53	0.44	0.333333	0.49	0.36	0.53	0.32	0.44	up
chr1:229896194:229897174:+@chr1:229904324:229904393:+@chr1:229924908:229926443:+	DISC1	0.49	0.42	0.45	0.61	0.65	0.75	0.453333	0.67	0.49	0.75	0.42	0.61	up
chr1:233644371:233644556:+@chr1:233649355:233649499:+@chr1:233657078:233657259:+	TBCE	0.74	0.66	0.63	0.84	0.8	0.86	0.676667	0.833333	0.74	0.86	0.63	0.8	up
chr1:242916522:242916594:+@chr1:242919174:242919267:+@chr1:242921804:242922014:+	DESI2	0.67	0.65	0.73	0.76	0.74	0.9	0.683333	0.8	0.73	0.9	0.65	0.74	up
chr1:24600396:24600555:-@chr1:24591001:24591144:-@chr1:24590077:24590756:-	STPG1	0.12	0.14	0.11	0.23	0.23	0.23	0.123333	0.23	0.14	0.23	0.11	0.23	up
chr1:26672781:26672895:+@chr1:26673163:26673213:+	HMGN2	0.57	0.46	0.47	0.68	0.62	0.58	0.5	0.626667	0.57	0.68	0.46	0.58	up
chr1:28606508:28606561:+@chr1:28632029:28632144:+@chr1:28646515:28646588:+@chr1:28658183:28658356:+	PHACTR4	0.21	0.24	0.2	0.64	0.56	0.34	0.216667	0.513333	0.24	0.64	0.2	0.34	up
chr1:28779011:28779080:-@chr1:28778632:28778686:-	SNHG12	0.49	0.32	0.42	0.75	0.58	0.66	0.41	0.663333	0.49	0.75	0.32	0.58	up
chr1:28882682:28882839:+@chr1:28889173:28889285:+@chr1:28890684:28890808:+	GMEB1	0.72	0.71	0.66	0.91	0.83	0.83	0.696667	0.856667	0.72	0.91	0.66	0.83	up
chr1:32453861:32453983:-@chr1:32453324:32453736:-	TMEM234	0.51	0.5	0.48	0.78	0.58	0.52	0.496667	0.626667	0.51	0.78	0.48	0.52	up
chr1:40688435:40689347:+@chr1:40692462:40692547:+@chr1:40695204:40695698:+	ZFP69B	0.59	0.54	0.49	0.69	0.74	0.66	0.54	0.696667	0.59	0.74	0.49	0.66	up
chr1:42156671:42157176:-@chr1:41939174:41939253:-@chr1:41867007:41867205:-	HIVEP3	0.61	0.62	0.56	0.73	0.82	0.77	0.596667	0.773333	0.62	0.82	0.56	0.73	up
chr1:44137768:44137986:+@chr1:44139008:44139092:+@chr1:44158663:44158809:+	ST3GAL3	0.11	0.09	0.08	0.17	0.26	0.35	0.0933333	0.26	0.11	0.35	0.08	0.17	up
chr1:44214561:44214918|44214638:+@chr1:44215032:44216553:+	ATP6V0B	0.22	0.13	0.11	0.26	0.27	0.25	0.153333	0.26	0.22	0.27	0.11	0.25	up
chr1:44230106:44230263:+@chr1:44230412:44230646:+	CCDC24	0.25	0.38	0.5	0.68	0.53	0.77	0.376667	0.66	0.5	0.77	0.25	0.53	up
chr1:44593151:44593526:-@chr1:44591109:44591168:-@chr1:44577304:44577581:-	ERI3	0.73	0.73	0.69	0.83	0.78	0.93	0.716667	0.846667	0.73	0.93	0.69	0.78	up
chr1:44912948:44913132:+@chr1:44926455:44926578:+@chr1:44927935:44928162:+	C1orf228	0.16	0.31	0.3	0.32	0.41	0.36	0.256667	0.363333	0.31	0.41	0.16	0.32	up
chr1:45572650:45572770:-@chr1:45571177:45571583:-@chr1:45571022:45571093:-	MUTYH	0.59	0.24	0.31	0.61	0.7	0.62	0.38	0.643333	0.59	0.7	0.24	0.61	up
chr1:53513891:53514013:-@chr1:53510864:53510902:-@chr1:53509487:53509606:-	LRP8	0.39	0.41	0.49	0.57	0.62	0.72	0.43	0.636667	0.49	0.72	0.39	0.57	up
chr1:54425913:54426143:-@chr1:54422526|54424547:54422422:-	CYB5RL	0.35	0.55	0.35	0.71	0.64	0.73	0.416667	0.693333	0.55	0.73	0.35	0.64	up
chr1:62790991:62791160:-@chr1:62783206:62783298:-@chr1:62781898:62782004:-	DOCK7	0.22	0.21	0.14	0.57	0.54	0.53	0.19	0.546667	0.22	0.57	0.14	0.53	up
chr1:754246:754347:+@chr1:777170:777476:+@chr1:777914:778009:+	LINC01128	0.55	0.67	0.63	0.76	0.79	0.69	0.616667	0.746667	0.67	0.79	0.55	0.69	up
chr1:7793085:7793235|7793214:+@chr1:7801932:7802094:+	PER3	0.35	0.47	0.35	0.59	0.54	0.57	0.39	0.566667	0.47	0.59	0.35	0.54	up
chr1:78156398:78156546:+@chr1:78163461:78163502:+@chr1:78164687:78164884:+	NEXN	0.49	0.43	0.5	0.6	0.69	0.84	0.473333	0.71	0.5	0.84	0.43	0.6	up
chr1:82190229:82190414:+@chr1:82191259:82191297:+@chr1:82194149:82194332:+	ADGRL2	0.39	0.35	0.39	0.44	0.63	0.47	0.376667	0.513333	0.39	0.63	0.35	0.44	up
chr1:82223531:82223627:+@chr1:82225561:82225613:+@chr1:82228663:82231010:+	ADGRL2	0.33	0.21	0.23	0.35	0.42	0.4	0.256667	0.39	0.33	0.42	0.21	0.35	up
chr1:94779681:94780003:-@chr1:94778928|94779210:94778716:-	F3	0.44	0.41	0.42	0.64	0.61	0.46	0.423333	0.57	0.44	0.64	0.41	0.46	up
chr1:9723739:9723905:-@chr1:9720143:9720199:-@chr1:9718530:9718687:-	CLSTN1	0.26	0.22	0.29	0.57	0.61	0.61	0.256667	0.596667	0.29	0.61	0.22	0.57	up
chr1:985520:985636:+@chr1:986263:986360:+@chr1:988322:988444:+	LOC100288175	0.33	0.4	0.3	0.48	0.52	0.45	0.343333	0.483333	0.4	0.52	0.3	0.45	up
chr20:30480802:30480895:+@chr20:30481365:30481517:+@chr20:30482785:30482948:+	ASXL1	0.68	0.63	0.73	0.87	0.83	0.81	0.68	0.836667	0.73	0.87	0.63	0.81	up
chr20:30832820:30832881:+@chr20:30836225:30836326:+@chr20:30838697:30838918:+	DNMT3B	0.27	0.17	0.26	0.46	0.47	0.52	0.233333	0.483333	0.27	0.52	0.17	0.46	up
chr20:31452895:31453374:-@chr20:31445499:31445533:-@chr20:31443406:31443709:-	CDK5RAP1	0.46	0.53	0.34	0.63	0.72	0.76	0.443333	0.703333	0.53	0.76	0.34	0.63	up
chr20:31711726:31711862:-@chr20:31711465|31711470:31711352:-	NECAB3	0.74	0.88	0.79	0.89	0.94	0.91	0.803333	0.913333	0.88	0.94	0.74	0.89	up
chr20:34249195:34249377:+@chr20:34260824:34261234:+@chr20:34263608:34263712:+	EPB41L1	0.32	0.39	0.29	0.43	0.53	0.46	0.333333	0.473333	0.39	0.53	0.29	0.43	up
chr20:35755822:35755968:+@chr20:35756743:35756849:+@chr20:35778114:35778233:+@chr20:35794695:35794883:+	CTNNBL1	0.16	0.11	0.11	0.22	0.2	0.29	0.126667	0.236667	0.16	0.29	0.11	0.2	up
chr20:39331137:39331044|39331033:-@chr20:39264111:39267120:-	ZHX3	0.3	0.21	0.24	0.58	0.45	0.58	0.25	0.536667	0.3	0.58	0.21	0.45	up
chr20:3944084:3944229:-@chr20:3902979:3903047:-@chr20:3892522:3892671:-	RNF24	0.32	0.26	0.23	0.33	0.39	0.46	0.27	0.393333	0.32	0.46	0.23	0.33	up
chr20:42272928:42273131:+@chr20:42276961:42277057:+@chr20:42286875:42288080:+	OSER1-AS1	0.37	0.32	0.33	0.56	0.45	0.43	0.34	0.48	0.37	0.56	0.32	0.43	up
chr20:42272928:42273131:+@chr20:42277010:42277057:+@chr20:42286875:42288080:+	OSER1-AS1	0.19	0.19	0.2	0.33	0.38	0.38	0.193333	0.363333	0.2	0.38	0.19	0.33	up
chr20:48991975:48992144:-@chr20:48991049:48991153:-@chr20:48990809:48990899:-	DPM1	0.6	0.62	0.61	0.63	0.83	0.74	0.61	0.733333	0.62	0.83	0.6	0.63	up
chr20:60138236:60138403:+@chr20:60138670:60138747:+@chr20:60138981:60139142:+	LSM14B	0.77	0.77	0.73	0.87	0.85	0.91	0.756667	0.876667	0.77	0.91	0.73	0.85	up
chr21:36330253:36330419:-@chr21:36328710:36330128:-	SETD4	0.3	0.28	0.34	0.48	0.52	0.4	0.306667	0.466667	0.34	0.52	0.28	0.4	up
chr21:37660965:37661800:+@chr21:37704742:37704842:+@chr21:37709662:37709737:+@chr21:37714471:37714556:+	DYRK1A	0.37	0.28	0.44	0.47	0.55	0.52	0.363333	0.513333	0.44	0.55	0.28	0.47	up
chr21:45171211:45171347:+@chr21:45172007:45172010:+@chr21:45172197:45174016:+	ITGB2-AS1	0.48	0.5	0.44	0.66	0.63	0.57	0.473333	0.62	0.5	0.66	0.44	0.57	up
chr21:45466361:45466450:+@chr21:45469890:45470902:+	ADARB1	0.39	0.4	0.4	0.5	0.49	0.52	0.396667	0.503333	0.4	0.52	0.39	0.49	up
chr21:45466361:45466623:+@chr21:45469890:45470902:+	ADARB1	0.42	0.49	0.44	0.56	0.59	0.58	0.45	0.576667	0.49	0.59	0.42	0.56	up
chr21:45466361:45467920|45466623:+@chr21:45469890:45470903:+	ADARB1	0.54	0.57	0.58	0.72	0.63	0.72	0.563333	0.69	0.58	0.72	0.54	0.63	up
chr21:46566981:46568812:-@chr21:46563127:46563303:-@chr21:46562354:46562562:-	C21orf58	0.09	0.2	0.27	0.39	0.4	0.46	0.186667	0.416667	0.27	0.46	0.09	0.39	up
chr22:16694620:16694873:-@chr22:16689220:16689282:-@chr22:16685705:16685826:-	MICAL3	0.06	0.16	0.13	0.19	0.65	0.43	0.116667	0.423333	0.16	0.65	0.06	0.19	up
chr22:17545460:17545554:-@chr22:17545240:17545378:-	SLC25A1	0.37	0.36	0.43	0.52	0.46	0.53	0.386667	0.503333	0.43	0.53	0.36	0.46	up
chr22:20160449:20160291|20160281:-@chr22:20159500:20159589:-	PI4KAP2	0.22	0.15	0.19	0.26	0.33	0.35	0.186667	0.313333	0.22	0.35	0.15	0.26	up
chr22:22463943:22464081|22464054:+@chr22:22465746:22465875:+	SMARCB1	0.55	0.49	0.41	0.68	0.71	0.63	0.483333	0.673333	0.55	0.71	0.41	0.63	up
chr22:22509251:22509341:-@chr22:22508921:22509149:-	DERL3	0.61	0.66	0.71	0.78	0.85	0.78	0.66	0.803333	0.71	0.85	0.61	0.78	up
chr22:23349747:23349883:+@chr22:23353377|23353399:23353586:+	GGT1,GGTLC2,GGTLC1,GGT2,LOC102724197	0.19	0.08	0.16	0.26	0.22	0.26	0.143333	0.246667	0.19	0.26	0.08	0.22	up
chr22:27999727:27999853:+@chr22:28000254|28000257:28000271:+	EWSR1	0.24	0.22	0.38	0.51	0.46	0.42	0.28	0.463333	0.38	0.51	0.22	0.42	up
chr22:28056367:28056566:-@chr22:28055701:28055709:-@chr22:28053669:28054884:-	AP1B1	0.02	0.02	0.01	0.16	0.13	0.13	0.0166667	0.14	0.02	0.16	0.01	0.13	up
chr22:28329545:28330101:+@chr22:28365079:28365201:+@chr22:28368191:28368274:+	NF2	0.3	0.23	0.3	0.48	0.39	0.4	0.276667	0.423333	0.3	0.48	0.23	0.39	up
chr22:28409009:28409053:+@chr22:28409690:28409904:+	NF2	0.3	0.51	0.37	0.66	0.77	0.65	0.393333	0.693333	0.51	0.77	0.3	0.65	up
chr22:29393449:29393873:-@chr22:29392794:29392925:-@chr22:29387450:29390067:-	DUSP18	0.16	0.17	0.11	0.32	0.22	0.27	0.146667	0.27	0.17	0.32	0.11	0.22	up
chr22:29833363:29833566:-@chr22:29832032|29832149:29831916:-	SELENOM	0.19	0.24	0.21	0.28	0.35	0.41	0.213333	0.346667	0.24	0.41	0.19	0.28	up
chr22:34485881:34486025:-@chr22:34482098:34482137:-@chr22:34472466:34472554:-	RBFOX2	0.67	0.64	0.63	0.76	0.79	0.72	0.646667	0.756667	0.67	0.79	0.63	0.72	up
chr22:36533858:36534116:+@chr22:36535902:36536110:+@chr22:36538840:36539029:+	GCAT	0.8	0.79	0.49	0.84	0.83	0.82	0.693333	0.83	0.8	0.84	0.49	0.82	up
chr22:36799726:36799776:+@chr22:36800260:36800404:+	PICK1	0.31	0.19	0.36	0.45	0.4	0.38	0.286667	0.41	0.36	0.45	0.19	0.38	up
chr22:39150156:39150331:-@chr22:39149486:39149635:-@chr22:39146793:39147050:-	MKL1	0.82	0.72	0.67	0.89	0.87	0.83	0.736667	0.863333	0.82	0.89	0.67	0.83	up
chr22:39545145:39545345:-@chr22:39524973:39524990:-@chr22:39504959:39505075:-	MIR4766,SLC25A17	0.1	0.07	0.13	0.17	0.22	0.25	0.1	0.213333	0.13	0.25	0.07	0.17	up
chr22:39583034:39583195:+@chr22:39586624|39586628:39586743:+	XPNPEP3	0.22	0.18	0.19	0.28	0.37	0.37	0.196667	0.34	0.22	0.37	0.18	0.28	up
chr22:40678132:40678371:+@chr22:40681988:40682102:+@chr22:40683622:40684892:+	LINC00634	0.23	0.3	0.27	0.32	0.51	0.41	0.266667	0.413333	0.3	0.51	0.23	0.32	up
chr22:43938122:43938382:-@chr22:43932605:43932730:-@chr22:43913369:43913461:-		0.43	0.23	0.33	0.53	0.59	0.46	0.33	0.526667	0.43	0.59	0.23	0.46	up
chr2:10731097:10731134:-@chr2:10729131:10729267:-@chr2:10726235:10726300:-	NOL10	0.55	0.47	0.47	0.68	0.61	0.62	0.496667	0.636667	0.55	0.68	0.47	0.61	up
chr2:111597781:111597917:+@chr2:111598098:111598187:+	BCL2L11	0.43	0.52	0.6	0.65	0.65	0.67	0.516667	0.656667	0.6	0.67	0.43	0.65	up
chr2:114114941:114115052:+@chr2:114115400|114115403:114115497:+	RABL2A	0.71	0.77	0.66	0.83	0.94	0.85	0.713333	0.873333	0.77	0.94	0.66	0.83	up
chr2:120641512:120641553:+@chr2:120641923:120642053:+@chr2:120648887:120653167:+	EPB41L5	0.71	0.33	0.67	0.85	0.83	0.77	0.57	0.816667	0.71	0.85	0.33	0.77	up
chr2:121884912:121885015:-@chr2:121883070:121883093:-@chr2:121881517:121881761:-	CLASP1	0.6	0.5	0.49	0.67	0.67	0.67	0.53	0.67	0.6	0.67	0.49	0.67	up
chr2:130638417:130638488:-@chr2:130635229:130635315:-@chr2:130631294:130631439:-	SMPD4	0.23	0.26	0.27	0.3	0.39	0.44	0.253333	0.376667	0.27	0.44	0.23	0.3	up
chr2:131724821:131724891:+@chr2:131726569:131726613:+@chr2:131726961:131727142:+	POTEE,PLEKHB2	0.69	0.77	0.55	0.88	0.78	0.78	0.67	0.813333	0.77	0.88	0.55	0.78	up
chr2:159902529:159902324|159902219:-@chr2:159901699:159901834:-	BAZ2B	0.41	0.44	0.45	0.63	0.66	0.76	0.433333	0.683333	0.45	0.76	0.41	0.63	up
chr2:165405912:165406578:-@chr2:165344411:165344541:-@chr2:165307941:165308631:-	COBLL1	0.3	0.15	0.28	0.38	0.32	0.54	0.243333	0.413333	0.3	0.54	0.15	0.32	up
chr2:165405912:165406578:-@chr2:165402184:165402254:-@chr2:165307941:165308631:-	COBLL1	0.08	0.03	0.09	0.18	0.15	0.19	0.0666667	0.173333	0.09	0.19	0.03	0.15	up
chr2:166358771:166359438:-@chr2:166337081:166337172:-@chr2:166336021:166336139:-@chr2:166334416:166335564:-	GALNT3	0.13	0.08	0.06	0.27	0.18	0.14	0.09	0.196667	0.13	0.27	0.06	0.14	up
chr2:171896623:171896560|171896521:-@chr2:171895315:171895454:-	METTL8	0.23	0.18	0.14	0.36	0.38	0.57	0.183333	0.436667	0.23	0.57	0.14	0.36	up
chr2:175666035:175666241:-@chr2:175665517:175665590:-@chr2:175653237:175653739:-	ATF2	0.11	0.11	0.22	0.27	0.25	0.31	0.146667	0.276667	0.22	0.31	0.11	0.25	up
chr2:178934655:178934788:+@chr2:178945099:178945206:+@chr2:178946863:178947000:+	OSBPL6	0.8	0.74	0.54	0.82	0.81	0.85	0.693333	0.826667	0.8	0.85	0.54	0.81	up
chr2:178999339:178999653|178999478:+@chr2:179003668:179003862:+	LOC101927027	0.43	0.52	0.54	0.55	0.81	0.63	0.496667	0.663333	0.54	0.81	0.43	0.55	up
chr2:191973353:191973439:+@chr2:191975603:191975689:+@chr2:191981086:191981160:+	MYO1B	0.23	0.29	0.48	0.87	0.64	0.62	0.333333	0.71	0.48	0.87	0.23	0.62	up
chr2:215967496:215967687:-@chr2:215965899:215966171:-@chr2:215964600:215964782:-	FN1	0.29	0.27	0.28	0.52	0.51	0.46	0.28	0.496667	0.29	0.52	0.27	0.46	up
chr2:218839410:218839554:-@chr2:218838546:218838913:-	AAMP	0.3	0.28	0.28	0.41	0.48	0.62	0.286667	0.503333	0.3	0.62	0.28	0.41	up
chr2:219055037:219055201:-@chr2:219052617:219052682:-@chr2:219049807:219049948:-	USP37	0.72	0.7	0.65	0.87	0.77	0.75	0.69	0.796667	0.72	0.87	0.65	0.75	up
chr2:219231947:219232509:-@chr2:219231668:219231768:-@chr2:219229117:219229430:-	ZNF142	0.6	0.54	0.52	0.87	0.67	0.66	0.553333	0.733333	0.6	0.87	0.52	0.66	up
chr2:219232623:219232710:+@chr2:219233004:219233133:+@chr2:219233274:219233388:+@chr2:219233906:219234487:+	BCS1L	0.52	0.46	0.44	0.55	0.53	0.65	0.473333	0.576667	0.52	0.65	0.44	0.53	up
chr2:227882164:227882278:+@chr2:227883736:227883908:+@chr2:227884746:227887800:+	COL4A3	0.65	0.66	0.63	0.76	0.78	0.83	0.646667	0.79	0.66	0.83	0.63	0.76	up
chr2:227913252:227913340:+@chr2:227925474:227925533:+@chr2:227928637:227928999:+	MFF	0.61	0.41	0.54	0.77	0.67	0.69	0.52	0.71	0.61	0.77	0.41	0.67	up
chr2:238098983:238099187:+@chr2:238100711:238100898:+@chr2:238107946:238108029:+	MLPH	0.37	0.32	0.46	0.7	0.8	0.75	0.383333	0.75	0.46	0.8	0.32	0.7	up
chr2:238100711:238100898:+@chr2:238107946:238108029:+@chr2:238113730:238113915:+	MLPH	0.11	0.11	0.11	0.54	0.47	0.47	0.11	0.493333	0.11	0.54	0.11	0.47	up
chr2:238999877:239000499:+@chr2:239006693:239006827:+@chr2:239006929:239007075:+	ASB1	0.07	0.18	0.11	0.26	0.56	0.34	0.12	0.386667	0.18	0.56	0.07	0.26	up
chr2:241184024:241184611:+@chr2:241184940:241185032:+@chr2:241185978:241186177:+	CAPN10	0.64	0.65	0.71	0.79	0.83	0.76	0.666667	0.793333	0.71	0.83	0.64	0.76	up
chr2:241903189:241903698:+@chr2:241904510:241904643:+@chr2:241905587:241905687:+	SEPT2	0.4	0.43	0.33	0.74	0.57	0.68	0.386667	0.663333	0.43	0.74	0.33	0.57	up
chr2:27659340:27659513:+@chr2:27674438|27674441:27674625:+	ZNF512	0.66	0.78	0.8	0.83	0.93	0.93	0.746667	0.896667	0.8	0.93	0.66	0.83	up
chr2:43791132:43791218:+@chr2:43792868:43793026:+	PLEKHH2	0.41	0.17	0.46	0.58	0.68	0.55	0.346667	0.603333	0.46	0.68	0.17	0.55	up
chr2:53852548:53852588|53852583:+@chr2:53854783:53855835:+	CHAC2	0.11	0.08	0.09	0.29	0.18	0.24	0.0933333	0.236667	0.11	0.29	0.08	0.18	up
chr2:64665856:64666183:+@chr2:64672523|64672526:64673643:+	AFTPH	0.55	0.62	0.6	0.71	0.67	0.73	0.59	0.703333	0.62	0.73	0.55	0.67	up
chr2:66649303:66649392:+@chr2:66649686:66649781:+@chr2:66651882:66653960:+	MEIS1	0.33	0.32	0.33	0.49	0.66	0.43	0.326667	0.526667	0.33	0.66	0.32	0.43	up
chr2:70308371:70308475:-@chr2:70305964:70306029:-@chr2:70305057:70305265:-	TIA1,C2orf42	0.23	0.27	0.23	0.38	0.29	0.44	0.243333	0.37	0.27	0.44	0.23	0.29	up
chr2:73299497:73299605:+@chr2:73300588|73300706:73300826:+	SMYD5	0.39	0.34	0.37	0.7	0.57	0.46	0.366667	0.576667	0.39	0.7	0.34	0.46	up
chr2:73314892:73315020:+@chr2:73323609|73323640:73323765:+	CCT7	0.1	0.22	0.19	0.29	0.55	0.42	0.17	0.42	0.22	0.55	0.1	0.29	up
chr2:95844146:95844413:-@chr2:95843609|95843620:95843525:-		0.59	0.45	0.73	0.81	0.81	0.82	0.59	0.813333	0.73	0.82	0.45	0.81	up
chr3:10040431:10040244|10040214:-@chr3:10030926:10032210:-	CIDECP	0.59	0.62	0.54	0.65	0.74	0.68	0.583333	0.69	0.62	0.74	0.54	0.65	up
chr3:101547119:101547212:+@chr3:101547715:101547789:+	NIT2	0.43	0.26	0.44	0.48	0.66	0.64	0.376667	0.593333	0.44	0.66	0.26	0.48	up
chr3:102980719:102980858:+@chr3:102981268:102981434:+@chr3:102983644:102983824:+	NXPE3	0.33	0.21	0.25	0.48	0.36	0.39	0.263333	0.41	0.33	0.48	0.21	0.36	up
chr3:114192455:114192872:+@chr3:114196672:114196802:+@chr3:114198429:114198528:+	GTPBP8	0.34	0.39	0.31	0.41	0.59	0.48	0.346667	0.493333	0.39	0.59	0.31	0.41	up
chr3:125157892:125158332:-@chr3:125157583:125157652:-@chr3:125150401:125150669:-	CCDC14	0.77	0.76	0.5	0.78	0.88	0.87	0.676667	0.843333	0.77	0.88	0.5	0.78	up
chr3:140546082:140546250:+@chr3:140548410|140548413:140548576:+	MRPS22	0.62	0.53	0.56	0.81	0.68	0.82	0.57	0.77	0.62	0.82	0.53	0.68	up
chr3:142587979:142588469:+@chr3:142597791:142598035:+@chr3:142605459:142605563:+	ZBTB38	0.52	0.69	0.64	0.77	0.79	0.74	0.616667	0.766667	0.69	0.79	0.52	0.74	up
chr3:143706671:143706835:-@chr3:143704894:143704985:-@chr3:143701159:143701250:-	ATR	0.79	0.83	0.79	0.94	0.92	0.9	0.803333	0.92	0.83	0.94	0.79	0.9	up
chr3:147279593:147279734:-@chr3:147278339:147278401:-@chr3:147277259:147277372:-	PLOD2	0.52	0.53	0.52	0.7	0.7	0.69	0.523333	0.696667	0.53	0.7	0.52	0.69	up
chr3:15069978:15069891|15069802:-@chr3:15065850:15066446:-	MRPS25	0.12	0.3	0.23	0.34	0.32	0.45	0.216667	0.37	0.3	0.45	0.12	0.32	up
chr3:151169027:151168886|151168880:-@chr3:151165363:151167063:-	PFN2,ANKUB1	0.61	0.51	0.48	0.75	0.63	0.7	0.533333	0.693333	0.61	0.75	0.48	0.63	up
chr3:153645761:153646018:+@chr3:153648099:153648252:+@chr3:153656021:153656056:+	MBNL1	0.5	0.35	0.42	0.75	0.61	0.65	0.423333	0.67	0.5	0.75	0.35	0.61	up
chr3:158703954:158704109:-@chr3:158699878:158700139:-@chr3:158695695:158695989:-	VEPH1	0.69	0.79	0.74	0.84	0.84	0.89	0.74	0.856667	0.79	0.89	0.69	0.84	up
chr3:173955779:173955858:+@chr3:173955967:173956059:+@chr3:173957467:173957649:+	ECT2	0.46	0.38	0.48	0.61	0.58	0.56	0.44	0.583333	0.48	0.61	0.38	0.56	up
chr3:186086451:186086638:+@chr3:186093716:186093894:+@chr3:186095185:186095407:+	VPS8	0.24	0.06	0.19	0.3	0.27	0.27	0.163333	0.28	0.24	0.3	0.06	0.27	up
chr3:187983071:187984122:+@chr3:187984915|187984917:187984960:+	EIF4A2,MIR1248	0.32	0.35	0.54	0.84	0.56	0.65	0.403333	0.683333	0.54	0.84	0.32	0.56	up
chr3:194816157:194816253:+@chr3:194817661:194817768:+@chr3:194819352:194819419:+	OPA1	0.81	0.84	0.68	0.87	0.89	0.92	0.776667	0.893333	0.84	0.92	0.68	0.87	up
chr3:194819311:194819419:+@chr3:194826575:194826685:+@chr3:194832095:194832148:+	OPA1	0.74	0.55	0.49	0.79	0.78	0.81	0.593333	0.793333	0.74	0.81	0.49	0.78	up
chr3:196737884:196737991:-@chr3:196731776:196731873:-@chr3:196727104:196727271:-	PPP1R2	0.05	0.07	0.07	0.12	0.14	0.25	0.0633333	0.17	0.07	0.25	0.05	0.12	up
chr3:44494087:44494167:-@chr3:44474740:44474860:-@chr3:44471617:44472192:-	ZNF445	0.73	0.56	0.44	0.78	0.74	0.74	0.576667	0.753333	0.73	0.78	0.44	0.74	up
chr3:48317128:48317021|48316925:-@chr3:48313137:48315017:-	NME6	0.62	0.51	0.64	0.72	0.73	0.83	0.59	0.76	0.64	0.83	0.51	0.72	up
chr3:48317847:48318179:-@chr3:48316925:48317128:-@chr3:48313137:48315017:-	NME6	0.33	0.43	0.36	0.68	0.5	0.49	0.373333	0.556667	0.43	0.68	0.33	0.49	up
chr3:48436637:48436670:-@chr3:48435990:48436087:-	PLXNB1	0.53	0.58	0.5	0.64	0.64	0.66	0.536667	0.646667	0.58	0.66	0.5	0.64	up
chr3:49028777:49028595|49028591:-@chr3:49028410:49028517:-	DALRD3	0.5	0.43	0.5	0.52	0.58	0.72	0.476667	0.606667	0.5	0.72	0.43	0.52	up
chr3:49106349:49106809:-@chr3:49104834:49104893:-@chr3:49089019:49089475:-	QRICH1	0.17	0.18	0.12	0.26	0.23	0.28	0.156667	0.256667	0.18	0.28	0.12	0.23	up
chr3:49482569:49482870:+@chr3:49489286:49489342:+@chr3:49499691:49499852:+	DAG1	0.29	0.23	0.26	0.55	0.4	0.35	0.26	0.433333	0.29	0.55	0.23	0.35	up
chr3:49697449:49697943:-@chr3:49697272|49697321:49697175:-	MST1	0.62	0.43	0.36	0.65	0.73	0.77	0.47	0.716667	0.62	0.77	0.36	0.65	up
chr3:50285310:50286263:+@chr3:50286348|50286351:50286492:+	SEMA3B,MIR6872	0.39	0.3	0.42	0.62	0.49	0.7	0.37	0.603333	0.42	0.7	0.3	0.49	up
chr3:51388219:51388306:+@chr3:51392596:51392678:+@chr3:51393521:51396669:+	DOCK3	0.56	0.58	0.62	0.64	0.82	0.66	0.586667	0.706667	0.62	0.82	0.56	0.64	up
chr3:52300016:52300167:+@chr3:52301316:52301625:+@chr3:52302102:52302248:+	GLYCTK	0.74	0.73	0.65	0.82	0.84	0.82	0.706667	0.826667	0.74	0.84	0.65	0.82	up
chr3:52300016:52300167:+@chr3:52301316|52302102:52302248:+	GLYCTK	0.77	0.71	0.69	0.88	0.87	0.79	0.723333	0.846667	0.77	0.88	0.69	0.79	up
chr3:52842170:52842486:-@chr3:52840464:52840534:-@chr3:52838916:52839726:-	ITIH4,TMEM110-MUSTN1	0.23	0.32	0.36	0.38	0.39	0.65	0.303333	0.473333	0.36	0.65	0.23	0.38	up
chr3:53810125:53810492:+@chr3:53811214:53811240:+@chr3:53812490:53812639:+	CACNA1D	0.11	0.14	0.17	0.28	0.3	0.27	0.14	0.283333	0.17	0.3	0.11	0.27	up
chr3:57883656:57883790:+@chr3:57886612:57886701:+@chr3:57888063:57891305:+	SLMAP	0.49	0.47	0.48	0.61	0.67	0.67	0.48	0.65	0.49	0.67	0.47	0.61	up
chr3:69233680:69233901|69233895:+@chr3:69236305:69238129:+	ARL6IP5	0.36	0.48	0.59	0.6	0.72	0.87	0.476667	0.73	0.59	0.87	0.36	0.6	up
chr3:9829932:9830029:+@chr3:9832758:9832886:+@chr3:9834374:9834443:+@chr3:9835239:9835604:+	ARPC4,TTLL3,ARPC4,ARPC4-TTLL3	0.68	0.38	0.57	0.79	0.72	0.76	0.543333	0.756667	0.68	0.79	0.38	0.72	up
chr3:9843681:9843924|9843832:+@chr3:9845644:9846079:+	TTLL3,ARPC4,ARPC4-TTLL3	0.72	0.64	0.64	0.8	0.82	0.75	0.666667	0.79	0.72	0.82	0.64	0.75	up
chr4:113746613:113746696:-@chr4:113730329:113730479:-@chr4:113727885:113728534:-	ZGRF1	0.69	0.49	0.54	0.81	0.73	0.74	0.573333	0.76	0.69	0.81	0.49	0.73	up
chr4:128825014:128825091:+@chr4:128826047|128828283:128828472:+	INTU	0.23	0.22	0.26	0.39	0.27	0.64	0.236667	0.433333	0.26	0.64	0.22	0.27	up
chr4:13085040:13085128:-@chr4:13071421:13071546:-@chr4:12992213:12992316:-	RAB28	0.42	0.48	0.53	0.79	0.79	0.58	0.476667	0.72	0.53	0.79	0.42	0.58	up
chr4:156513738:156514058:-@chr4:156509411|156509414:156509188:-	MAP9	0.38	0.29	0.3	0.51	0.47	0.48	0.323333	0.486667	0.38	0.51	0.29	0.47	up
chr4:169558552:169558704:-@chr4:169553850|169553853:169553685:-	DDX60L	0.42	0.37	0.42	0.64	0.53	0.53	0.403333	0.566667	0.42	0.64	0.37	0.53	up
chr4:185576680:185576856:-@chr4:185566306:185566423:-@chr4:185557063:185557227:-	IRF2	0.81	0.67	0.78	0.88	0.88	0.83	0.753333	0.863333	0.81	0.88	0.67	0.83	up
chr4:185806779:185806651|185806613:-@chr4:185796549:185796616:-	CASP3	0.72	0.77	0.75	0.88	0.9	0.8	0.746667	0.86	0.77	0.9	0.72	0.8	up
chr4:20134735:20134898:+@chr4:20135870:20135893:+@chr4:20139670:20139820:+	MIR218-1,SLIT2	0.29	0.34	0.4	0.47	0.53	0.41	0.343333	0.47	0.4	0.53	0.29	0.41	up
chr4:2904125:2904734:-@chr4:2903876:2903934:-@chr4:2902900:2903678:-	MFSD10	0.81	0.83	0.83	0.94	0.9	0.95	0.823333	0.93	0.83	0.95	0.81	0.9	up
chr4:662747:662962|662822:+@chr4:663703:663807:+	MYL5	0.12	0.19	0.17	0.37	0.22	0.21	0.16	0.266667	0.19	0.37	0.12	0.21	up
chr4:75227974:75228048:+@chr4:75244636:75244669:+@chr4:75259087:75259271:+	MTHFD2L	0.45	0.45	0.4	0.69	0.64	0.67	0.433333	0.666667	0.45	0.69	0.4	0.64	up
chr4:84003495:84003569:-@chr4:84001808:84001885:-@chr4:83997866:83997941:-	SEC31A	0.38	0.33	0.31	0.4	0.44	0.52	0.34	0.453333	0.38	0.52	0.31	0.4	up
chr4:85873559:85873786:-@chr4:85867038:85867088:-@chr4:85864603:85864771:-	WDFY3	0.36	0.31	0.42	0.52	0.47	0.52	0.363333	0.503333	0.42	0.52	0.31	0.47	up
chr4:89417319:89418818:-@chr4:89414602:89414661:-@chr4:89411176:89411365:-@chr4:89408917:89409082:-	PPM1K	0.29	0.21	0.24	0.52	0.39	0.49	0.246667	0.466667	0.29	0.52	0.21	0.39	up
chr4:931497:931942:+@chr4:932199|932299:932403:+	TMEM175	0.61	0.61	0.27	0.76	0.69	0.82	0.496667	0.756667	0.61	0.82	0.27	0.69	up
chr4:95418790:95418907:+@chr4:95419097|95419103:95419224:+	SMARCAD1	0.25	0.36	0.34	0.4	0.49	0.37	0.316667	0.42	0.36	0.49	0.25	0.37	up
chr5:122968317:122968423:+@chr5:122968932:122968955:+@chr5:122977935:122980638:+	CSNK1G3	0.14	0.2	0.25	0.35	0.45	0.4	0.196667	0.4	0.25	0.45	0.14	0.35	up
chr5:127446561:127446907:-@chr5:127425965:127426091:-@chr5:127424735:127424835:-	LINC01184	0.06	0.03	0.09	0.34	0.1	0.14	0.06	0.193333	0.09	0.34	0.03	0.1	up
chr5:131752502:131752612:+@chr5:131754281:131754495:+@chr5:131756024:131756206:+	SLC22A5	0.64	0.71	0.87	0.93	0.93	0.92	0.74	0.926667	0.87	0.93	0.64	0.92	up
chr5:131752502:131752612:+@chr5:131754367:131754495:+@chr5:131756024:131756206:+	SLC22A5	0.43	0.63	0.65	0.87	0.86	0.87	0.57	0.866667	0.65	0.87	0.43	0.86	up
chr5:132074550:132074649:-@chr5:132070042:132070050:-@chr5:132067050:132067210:-	KIF3A	0.33	0.32	0.19	0.45	0.65	0.61	0.28	0.57	0.33	0.65	0.19	0.45	up
chr5:133685381:133685493:-@chr5:133682948:133683087:-@chr5:133671469:133672056:-	CDKL3	0.48	0.31	0.55	0.61	0.66	0.61	0.446667	0.626667	0.55	0.66	0.31	0.61	up
chr5:138678263:138678324:+@chr5:138679664:138679776:+	MATR3	0.35	0.19	0.3	0.81	0.43	0.42	0.28	0.553333	0.35	0.81	0.19	0.42	up
chr5:141041924:141041984:-@chr5:141040222|141040254:141039714:-	ARAP3	0.31	0.4	0.26	0.47	0.84	0.66	0.323333	0.656667	0.4	0.84	0.26	0.47	up
chr5:141364735:141364865:-@chr5:141362963|141363011:141362837:-	GNPDA1	0.75	0.76	0.71	0.86	0.92	0.77	0.74	0.85	0.76	0.92	0.71	0.77	up
chr5:148865351:148865239|148865199:-@chr5:148852475:148856616:-	CSNK1A1	0.12	0.1	0.09	0.16	0.25	0.23	0.103333	0.213333	0.12	0.25	0.09	0.16	up
chr5:148865351:148865239|148865203:-@chr5:148852475:148856616:-	CSNK1A1	0.57	0.53	0.53	0.72	0.75	0.73	0.543333	0.733333	0.57	0.75	0.53	0.72	up
chr5:161508692:161508897:+@chr5:161511314:161511337:+@chr5:161512677:161515123:+	GABRG2	0.1	0.16	0.2	0.22	0.27	0.51	0.153333	0.333333	0.2	0.51	0.1	0.22	up
chr5:1686021:1685960|1685759:-@chr5:1682283:1683681:-		0.63	0.26	0.61	0.69	0.83	0.65	0.5	0.723333	0.63	0.83	0.26	0.65	up
chr5:176662684:176662616|176662184:-@chr5:176661532:176662103:-	RAB24,MXD3	0.61	0.58	0.32	0.72	0.68	0.68	0.503333	0.693333	0.61	0.72	0.32	0.68	up
chr5:177582459:177582541:-@chr5:177582187|177582205:177581962:-	PHYKPL	0.18	0.14	0.19	0.23	0.26	0.39	0.17	0.293333	0.19	0.39	0.14	0.23	up
chr5:179212984:179213043:-@chr5:179210849:179211030:-@chr5:179207062:179207672:-	C5orf45	0.31	0.22	0.27	0.42	0.49	0.41	0.266667	0.44	0.31	0.49	0.22	0.41	up
chr5:37178169:37178339:-@chr5:37175199:37175229:-	C5orf42	0.01	0.1	0.23	0.24	0.25	0.62	0.113333	0.37	0.23	0.62	0.01	0.24	up
chr5:43076870:43079426:+@chr5:43080252|43080302:43081127:+	LOC153684	0.37	0.39	0.33	0.57	0.65	0.5	0.363333	0.573333	0.39	0.65	0.33	0.5	up
chr5:61637746:61638120:+@chr5:61639893:61640095:+@chr5:61653167:61653305:+@chr5:61678714:61678808:+	KIF2A	0.3	0.2	0.41	0.64	0.51	0.44	0.303333	0.53	0.41	0.64	0.2	0.44	up
chr5:74842890:74843495:+@chr5:74866409:74866545:+@chr5:74878591:74878738:+	POLK	0.07	0.27	0.22	0.28	0.39	0.4	0.186667	0.356667	0.27	0.4	0.07	0.28	up
chr5:74921925:74922021:+@chr5:74925547:74925630:+@chr5:74927803:74928759:+	POLK	0.53	0.45	0.43	0.62	0.58	0.58	0.47	0.593333	0.53	0.62	0.43	0.58	up
chr5:7923883:7924036:+@chr5:7926486:7926639:+@chr5:7928371:7928488:+	MTRR,LOC107986404	0.48	0.53	0.51	0.65	0.54	0.7	0.506667	0.63	0.53	0.7	0.48	0.54	up
chr5:87560018:87560101:-@chr5:87557342:87557439:-@chr5:87552114:87552292:-	TMEM161B	0.82	0.8	0.75	0.89	0.93	0.93	0.79	0.916667	0.82	0.93	0.75	0.89	up
chr5:922360:922519:-@chr5:921919|922234:921722:-	BRD9	0.56	0.47	0.43	0.58	0.6	0.6	0.486667	0.593333	0.56	0.6	0.43	0.58	up
chr5:940476:940586:-@chr5:939819|939882:939707:-	BRD9	0.5	0.56	0.4	0.8	0.69	0.68	0.486667	0.723333	0.56	0.8	0.4	0.68	up
chr6:10795185:10795383:-@chr6:10793068:10793142:-@chr6:10791406:10791451:-	C6orf52	0.17	0.24	0.11	0.33	0.32	0.32	0.173333	0.323333	0.24	0.33	0.11	0.32	up
chr6:109586921:109587049|109586998:+@chr6:109587165:109587358:+	CEP57L1	0.31	0.46	0.25	0.6	0.52	0.74	0.34	0.62	0.46	0.74	0.25	0.52	up
chr6:116682007:116682239:+@chr6:116685072:116685193:+@chr6:116686302:116687128:+	DSE,DSE	0.09	0.21	0.13	0.25	0.26	0.25	0.143333	0.253333	0.21	0.26	0.09	0.25	up
chr6:119324625:119327418:-@chr6:119323633:119323727:-@chr6:119322691:119323048:-	FAM184A	0.22	0.11	0.07	0.24	0.45	0.31	0.133333	0.333333	0.22	0.45	0.07	0.24	up
chr6:125663383:125663504:-@chr6:125661559:125661661:-@chr6:125655673:125655754:-	HDDC2	0.54	0.57	0.61	0.77	0.64	0.65	0.573333	0.686667	0.61	0.77	0.54	0.64	up
chr6:126371231:126371311:+@chr6:126371496:126371584:+@chr6:126374092:126374256:+	TRMT11	0.13	0.15	0.13	0.24	0.34	0.24	0.136667	0.273333	0.15	0.34	0.13	0.24	up
chr6:150064608:150065095:-@chr6:150059921:150060015:-@chr6:150057903:150058050:-	LATS1	0.23	0.23	0.22	0.31	0.38	0.42	0.226667	0.37	0.23	0.42	0.22	0.31	up
chr6:167344291:167344371:+@chr6:167346986:167347045:+@chr6:167355887:167356113:+	FGFR1OP	0.26	0.2	0.17	0.52	0.48	0.33	0.21	0.443333	0.26	0.52	0.17	0.33	up
chr6:170705315:170705476:+@chr6:170707892|170707895:170708096:+	TBP	0.23	0.28	0.16	0.34	0.32	0.46	0.223333	0.373333	0.28	0.46	0.16	0.32	up
chr6:26646179:26646708:+@chr6:26648108:26648233:+@chr6:26651047:26651185:+@chr6:26653334:26655145:+	HMGN4	0.09	0.15	0.1	0.23	0.21	0.33	0.113333	0.256667	0.15	0.33	0.09	0.21	up
chr6:28411586:28411890:-@chr6:28405470|28405534:28405059:-	ZSCAN31	0.64	0.57	0.76	0.82	0.81	0.82	0.656667	0.816667	0.76	0.82	0.57	0.81	up
chr6:28429618:28432026:-@chr6:28429074:28429238:-@chr6:28417502:28417551:-@chr6:28412546:28412699:-	ZSCAN31	0.48	0.44	0.36	0.52	0.52	0.63	0.426667	0.556667	0.48	0.63	0.36	0.52	up
chr6:30787168:30787260:-@chr6:30783322:30784113:-@chr6:30783140:30783210:-	MDC1	0.56	0.69	0.67	0.7	0.87	0.8	0.64	0.79	0.69	0.87	0.56	0.7	up
chr6:30817903:30818112:-@chr6:30817548:30817555:-@chr6:30816946:30817460:-	FLOT1	0.47	0.36	0.39	0.72	0.63	0.51	0.406667	0.62	0.47	0.72	0.36	0.51	up
chr6:32027311:32027364|32027360:+@chr6:32027631:32027840:+	CFB	0.07	0.04	0.07	0.21	0.12	0.18	0.06	0.17	0.07	0.21	0.04	0.12	up
chr6:36622945:36623268:-@chr6:36615827:36615959:-@chr6:36601346:36601397:-	STK38	0.47	0.56	0.51	0.66	0.82	0.66	0.513333	0.713333	0.56	0.82	0.47	0.66	up
chr6:36622945:36623268:-@chr6:36615827:36615962:-@chr6:36601346:36601397:-	STK38	0.46	0.43	0.49	0.73	0.81	0.61	0.46	0.716667	0.49	0.81	0.43	0.61	up
chr6:41154746:41154881:+@chr6:41156528:41156614:+@chr6:41159763:41159909:+	NFYA	0.1	0.14	0.1	0.34	0.31	0.36	0.113333	0.336667	0.14	0.36	0.1	0.31	up
chr6:43574691:43574917|43574816:+@chr6:43576460:43578065:+	TJAP1	0.09	0.11	0.14	0.25	0.21	0.35	0.113333	0.27	0.14	0.35	0.09	0.21	up
chr6:5206559:5206892:+@chr6:5217658:5217721:+@chr6:5290486:5290572:+@chr6:5313782:5314414:+	FARS2	0.15	0.2	0.12	0.21	0.37	0.35	0.156667	0.31	0.2	0.37	0.12	0.21	up
chr6:86308422:86308480:-@chr6:86305275:86305301:-@chr6:86303229:86303361:-	SNX14	0.49	0.47	0.27	0.8	0.83	0.81	0.41	0.813333	0.49	0.83	0.27	0.8	up
chr6:88267563:88267747:+@chr6:88274857:88274903:+@chr6:88275478:88275612:+	CFAP206,SLC35A1	0.14	0.12	0.17	0.44	0.39	0.29	0.143333	0.373333	0.17	0.44	0.12	0.29	up
chr6:99938295:99938421:-@chr6:99937605:99937727:-@chr6:99934786:99934938:-	COQ3	0.13	0.13	0.07	0.27	0.14	0.27	0.11	0.226667	0.13	0.27	0.07	0.14	up
chr7:101997388:101997477:-@chr7:101994636|101995737:101994550:-	POLR2J3,POLR2J2	0.24	0.28	0.23	0.47	0.42	0.36	0.25	0.416667	0.28	0.47	0.23	0.36	up
chr7:116559175:116559250:+@chr7:116561414:116561482:+@chr7:116563371:116563525:+	ST7,ST7-OT3,MIR6132	0.5	0.43	0.35	0.7	0.7	0.54	0.426667	0.646667	0.5	0.7	0.35	0.54	up
chr7:120382849:120382914:+@chr7:120392032:120392128:+@chr7:120393916:120393987:+	ING3	0.64	0.48	0.42	0.75	0.67	0.74	0.513333	0.72	0.64	0.75	0.42	0.67	up
chr7:127828305:127828406:-@chr7:127828122:127828181:-@chr7:127827623:127827829:-	IMPDH1	0.56	0.59	0.5	0.85	0.67	0.84	0.55	0.786667	0.59	0.85	0.5	0.67	up
chr7:130319352:130319408:-@chr7:130302688:130302816:-@chr7:130295168:130295269:-@chr7:130279458:130281134:-	LINC-PINT	0.45	0.36	0.27	0.6	0.55	0.51	0.36	0.553333	0.45	0.6	0.27	0.51	up
chr7:137268190:137268550:-@chr7:137267919:137268087:-@chr7:137263323:137263652:-	CREB3L2	0.21	0.16	0.2	0.26	0.32	0.3	0.19	0.293333	0.21	0.32	0.16	0.26	up
chr7:148822228:148822866:-@chr7:148822094|148822139:148822013:-	ZNF746	0.62	0.64	0.65	0.81	0.75	0.74	0.636667	0.766667	0.65	0.81	0.62	0.74	up
chr7:150356443:150356630:+@chr7:150360864:150361081:+@chr7:150361463:150361624:+@chr7:150362293:150362849:+	ABCB8	0.52	0.57	0.49	0.75	0.64	0.58	0.526667	0.656667	0.57	0.75	0.49	0.58	up
chr7:150405330:150405800:-@chr7:150404933:150405256:-	FASTK	0.37	0.34	0.3	0.45	0.43	0.46	0.336667	0.446667	0.37	0.46	0.3	0.43	up
chr7:2239033:2239404:-@chr7:2236885|2236888:2236710:-	MAD1L1	0.75	0.63	0.79	0.85	0.93	0.93	0.723333	0.903333	0.79	0.93	0.63	0.85	up
chr7:2239033:2239404:-@chr7:2236885|2236925:2236710:-	MAD1L1	0.59	0.4	0.65	0.84	0.78	0.72	0.546667	0.78	0.65	0.84	0.4	0.72	up
chr7:22966400:22966559:-@chr7:22953096:22953391:-@chr7:22947403:22952307:-	FAM126A	0.72	0.72	0.74	0.9	0.87	0.85	0.726667	0.873333	0.74	0.9	0.72	0.85	up
chr7:22966400:22966559:-@chr7:22953177:22953391:-@chr7:22947403:22952307:-	FAM126A	0.53	0.53	0.48	0.72	0.74	0.71	0.513333	0.723333	0.53	0.74	0.48	0.71	up
chr7:24869640:24869743:-@chr7:24869344:24869436:-@chr7:24867757:24867913:-	OSBPL3	0.32	0.29	0.42	0.85	0.93	0.9	0.343333	0.893333	0.42	0.93	0.29	0.85	up
chr7:2560465:2560607:-@chr7:2555226:2555284:-@chr7:2554598:2554656:-@chr7:2553484:2553638:-	BRAT1	0.17	0.23	0.26	0.41	0.55	0.35	0.22	0.436667	0.26	0.55	0.17	0.35	up
chr7:26206712:26207706:+@chr7:26209116|26209122:26209167:+	CBX3	0.5	0.43	0.49	0.55	0.63	0.74	0.473333	0.64	0.5	0.74	0.43	0.55	up
chr7:44050764:44050944:+@chr7:44057954:44058070:+@chr7:44062881:44063027:+	DBNL,MIR6837	0.18	0.2	0.1	0.27	0.26	0.31	0.16	0.28	0.2	0.31	0.1	0.26	up
chr7:44050764:44050944:+@chr7:44058991:44059075:+@chr7:44062881:44063027:+	DBNL,MIR6837	0.12	0.13	0.15	0.22	0.29	0.3	0.133333	0.27	0.15	0.3	0.12	0.22	up
chr7:56108184:56108298:+@chr7:56109773:56109939:+@chr7:56112021:56112076:+	SUMF2	0.82	0.64	0.7	0.84	0.84	0.84	0.72	0.84	0.82	0.84	0.64	0.84	up
chr7:66112005:66112106:+@chr7:66116789:66116987:+@chr7:66120275:66120565:+	TYW1	0.58	0.8	0.81	0.86	0.82	0.84	0.73	0.84	0.81	0.86	0.58	0.82	up
chr7:72058321:72058436:-@chr7:72057788:72057962:-@chr7:72057367:72057577:-	NSUN5P1,NSUN5P2	0.47	0.71	0.55	0.79	0.78	0.78	0.576667	0.783333	0.71	0.79	0.47	0.78	up
chr7:74877542:74877679:+@chr7:74880003:74880146:+@chr7:74882099:74882237:+	NSUN5P1,TRIM73	0.3	0.35	0.36	0.41	0.61	0.4	0.336667	0.473333	0.36	0.61	0.3	0.4	up
chr7:74982979:74983089:-@chr7:74982040|74982045:74981906:-	PMS2P3	0.71	0.76	0.58	0.81	0.78	0.79	0.683333	0.793333	0.76	0.81	0.58	0.78	up
chr7:75928908:75929089:+@chr7:75944367:75944431:+@chr7:75947674:75948604:+	DTX2	0.26	0.16	0.21	0.51	0.39	0.27	0.21	0.39	0.26	0.51	0.16	0.27	up
chr7:75959201:75959506:+@chr7:75964590:75964730:+@chr7:75967694:75967773:+	DTX2	0.58	0.52	0.49	0.66	0.66	0.7	0.53	0.673333	0.58	0.7	0.49	0.66	up
chr7:76092775:76092936:-@chr7:76085553|76085868:76085436:-	POMZP3	0.08	0.08	0.12	0.18	0.28	0.17	0.0933333	0.21	0.12	0.28	0.08	0.17	up
chr7:76092775:76092936:-@chr7:76085750:76085868:-@chr7:76085436:76085553:-	POMZP3	0.17	0.27	0.19	0.37	0.4	0.3	0.21	0.356667	0.27	0.4	0.17	0.3	up
chr7:858772:858830:+@chr7:858973|858976:859115:+	SUN1	0.51	0.58	0.56	0.68	0.69	0.74	0.55	0.703333	0.58	0.74	0.51	0.68	up
chr7:91507924:91508148:+@chr7:91509296:91509436:+@chr7:91509918:91510393:+	AKAP9	0.31	0.33	0.3	0.41	0.56	0.42	0.313333	0.463333	0.33	0.56	0.3	0.41	up
chr7:98996066:98996254:+@chr7:98997447:98998053:+@chr7:98999422:99000264:+	ZNF655	0.72	0.67	0.7	0.8	0.73	0.91	0.696667	0.813333	0.72	0.91	0.67	0.73	up
chr7:98997447:98997532:+@chr7:98997903:98998053:+@chr7:99007247:99007351:+	ZNF655	0.71	0.72	0.49	0.78	0.77	0.73	0.64	0.76	0.72	0.78	0.49	0.73	up
chr7:99458978:99459020:+@chr7:99459111:99459491:+	ZKSCAN1	0.83	0.89	0.74	0.93	0.93	0.92	0.82	0.926667	0.89	0.93	0.74	0.92	up
chr7:99538234:99538340:+@chr7:99538423:99538492:+@chr7:99538968:99539078:+@chr7:99539171:99539251:+	AP4M1	0.55	0.57	0.32	0.75	0.72	0.69	0.48	0.72	0.57	0.75	0.32	0.69	up
chr7:99658156:99658279:-@chr7:99648606:99648692:-@chr7:99636212:99638162:-	GATS	0.23	0.21	0.25	0.36	0.34	0.33	0.23	0.343333	0.25	0.36	0.21	0.33	up
chr8:102997213:102997262:-@chr8:102968545:102968631:-@chr8:102832002:102832091:-@chr8:102800656:102801052:-	NCALD	0.05	0.05	0.16	0.25	0.2	0.48	0.0866667	0.31	0.16	0.48	0.05	0.2	up
chr8:103340389:103340533:-@chr8:103339036:103339067:-	UBR5	0.12	0.09	0.09	0.38	0.14	0.21	0.1	0.243333	0.12	0.38	0.09	0.14	up
chr8:105474188:105474395:-@chr8:105462588:105462718:-@chr8:105460828:105461247:-	DPYS	0.73	0.74	0.6	0.77	0.92	0.79	0.69	0.826667	0.74	0.92	0.6	0.77	up
chr8:125585769:125585697|125585693:-@chr8:125575255:125576964:-	TATDN1,MIR6844	0.8	0.84	0.6	0.85	0.88	0.86	0.746667	0.863333	0.84	0.88	0.6	0.85	up
chr8:128875942:128876162:+@chr8:128877322:128877436:+@chr8:128936583:128936747:+	PVT1,MIR1204	0.29	0.32	0.25	0.36	0.54	0.43	0.286667	0.443333	0.32	0.54	0.25	0.36	up
chr8:141753579:141753685:-@chr8:141749008:141749016:-@chr8:141747550:141747705:-	PTK2	0.12	0.12	0.1	0.22	0.21	0.33	0.113333	0.253333	0.12	0.33	0.1	0.21	up
chr8:144488285:144488426:-@chr8:144487653:144487830:-@chr8:144486032:144486202:-@chr8:144484769:144484884:-	TOP1MT	0.47	0.34	0.32	0.76	0.54	0.69	0.376667	0.663333	0.47	0.76	0.32	0.54	up
chr8:144962767:144963183:-@chr8:144961710:144961772:-@chr8:144961082:144961171:-	SCRIB,MIR937	0.08	0.06	0.12	0.55	0.48	0.44	0.0866667	0.49	0.12	0.55	0.06	0.44	up
chr8:145624680:145624755:-@chr8:145623170|145623482:145623100:-	VPS28	0.55	0.5	0.33	0.64	0.66	0.56	0.46	0.62	0.55	0.66	0.33	0.56	up
chr8:145714563:145715007:+@chr8:145715807|145715893:145716246:+	LRRC14	0.49	0.44	0.31	0.67	0.74	0.68	0.413333	0.696667	0.49	0.74	0.31	0.67	up
chr8:146086497:146086592:-@chr8:146086248|146086263:146086122:-	ZNF250	0.14	0.23	0.16	0.34	0.4	0.28	0.176667	0.34	0.23	0.4	0.14	0.28	up
chr8:159290:159417:-@chr8:156374:156407:-@chr8:147399:153710:-		0.23	0.37	0.39	0.56	0.42	0.45	0.33	0.476667	0.39	0.56	0.23	0.42	up
chr8:22110698:22110878:+@chr8:22114576|22115261:22115386:+	BMP1	0.23	0.22	0.22	0.33	0.32	0.32	0.223333	0.323333	0.23	0.33	0.22	0.32	up
chr8:22110698:22110878:+@chr8:22114576|22115266:22115386:+	BMP1	0.66	0.66	0.6	0.74	0.82	0.77	0.64	0.776667	0.66	0.82	0.6	0.74	up
chr8:28407642:28407779:+@chr8:28413369:28413414:+@chr8:28416106:28416638:+	FZD3	0.59	0.55	0.54	0.75	0.68	0.65	0.56	0.693333	0.59	0.75	0.54	0.65	up
chr8:49083493:49083583:+@chr8:49106945:49107038:+@chr8:49109979:49110174:+@chr8:49118146:49118294:+	UBE2V2	0.35	0.36	0.4	0.54	0.83	0.49	0.37	0.62	0.4	0.83	0.35	0.49	up
chr8:54916782:54916838:-@chr8:54916691:54916737:-	ATP6V1H	0.49	0.52	0.53	0.56	0.64	0.64	0.513333	0.613333	0.53	0.64	0.49	0.56	up
chr8:70704293:70704468:+@chr8:70713291:70713433:+@chr8:70713524:70713647:+	SULF1	0.63	0.63	0.8	0.87	0.84	0.88	0.686667	0.863333	0.8	0.88	0.63	0.84	up
chr8:8131890:8132207:+@chr8:8136473:8136612:+@chr8:8139031:8139797:+	FAM86B3P	0.29	0.45	0.28	0.58	0.5	0.54	0.34	0.54	0.45	0.58	0.28	0.5	up
chr8:95755712:95755910|95755898:+@chr8:95759607:95759775:+	ESRP1	0.5	0.53	0.53	0.66	0.8	0.68	0.52	0.713333	0.53	0.8	0.5	0.66	up
chr8:96039399:96039583:+@chr8:96056722:96056819:+@chr8:96062259:96062377:+	NDUFAF6	0.23	0.37	0.43	0.62	0.44	0.57	0.343333	0.543333	0.43	0.62	0.23	0.44	up
chr9:114959828:114959894:+@chr9:114960145:114960197:+@chr9:114963610:114964300:+	SLC31A2	0.1	0.09	0.09	0.11	0.15	0.34	0.0933333	0.2	0.1	0.34	0.09	0.11	up
chr9:115203313:115203439:-@chr9:115195548:115195600:-@chr9:115192694:115193034:-	ALAD	0.24	0.21	0.34	0.42	0.4	0.39	0.263333	0.403333	0.34	0.42	0.21	0.39	up
chr9:123083569:123083661:+@chr9:123083974:123084052:+@chr9:123084538:123084649:+@chr9:123104062:123104266:+	GSN	0.16	0.06	0.09	0.17	0.18	0.44	0.103333	0.263333	0.16	0.44	0.06	0.17	up
chr9:126778214:126778286:-@chr9:126777347:126777489:-@chr9:126773771:126773944:-	SCAI	0.15	0.1	0.13	0.29	0.22	0.27	0.126667	0.26	0.15	0.29	0.1	0.22	up
chr9:129199237:129199386:+@chr9:129199476:129199638:+@chr9:129202007:129202106:+	SLC2A8	0.22	0.2	0.2	0.28	0.3	0.5	0.206667	0.36	0.22	0.5	0.2	0.28	up
chr9:129537220:129537451:-@chr9:129536399:129536664:-@chr9:129533624:129535660:-	TOR2A	0.64	0.67	0.58	0.77	0.74	0.8	0.63	0.77	0.67	0.8	0.58	0.74	up
chr9:130024893:130024960:+@chr9:130026351:130026489:+@chr9:130028135:130028273:+@chr9:130036121:130036207:+	DNM1	0.06	0.13	0.07	0.15	0.3	0.3	0.0866667	0.25	0.13	0.3	0.06	0.15	up
chr9:130049475:130049586:+@chr9:130050024:130050035:+@chr9:130050683:130050853:+	DNM1	0.32	0.31	0.28	0.82	0.81	0.47	0.303333	0.7	0.32	0.82	0.28	0.47	up
chr9:130049475:130049590|130049586:+@chr9:130050683:130050853:+	DNM1	0.13	0.12	0.14	0.36	0.58	0.26	0.13	0.4	0.14	0.58	0.12	0.26	up
chr9:130075950:130076072:-@chr9:130074885:130074965:-@chr9:130070520:130070624:-	GOLGA2	0.4	0.34	0.28	0.49	0.64	0.52	0.34	0.55	0.4	0.64	0.28	0.49	up
chr9:130310976:130310991:+@chr9:130311169:130311197:+	GLE1	0.52	0.5	0.36	0.59	0.6	0.54	0.46	0.576667	0.52	0.6	0.36	0.54	up
chr9:130870298:130870436|130870432:+@chr9:130871176:130872301:+	MIGA2	0.19	0.17	0.14	0.27	0.3	0.31	0.166667	0.293333	0.19	0.31	0.14	0.27	up
chr9:130870298:130871075|130870432:+@chr9:130871176:130872301:+	MIGA2	0.8	0.75	0.7	0.86	0.84	0.88	0.75	0.86	0.8	0.88	0.7	0.84	up
chr9:138424601:138424882:-@chr9:138424363:138424474:-@chr9:138423272:138423340:-	SDCCAG3	0.42	0.29	0.45	0.5	0.66	0.83	0.386667	0.663333	0.45	0.83	0.29	0.5	up
chr9:138993496:138994557:+@chr9:138994953|138995106:138995128:+	PTGDS	0.32	0.16	0.22	0.73	0.37	0.33	0.233333	0.476667	0.32	0.73	0.16	0.33	up
chr9:139038416:139038509:-@chr9:139037325|139038113:139037214:-	ABCA2	0.12	0.16	0.17	0.38	0.22	0.31	0.15	0.303333	0.17	0.38	0.12	0.22	up
chr9:139128736:139128849:-@chr9:139128516:139128651:-	DPP7	0.25	0.28	0.17	0.32	0.4	0.39	0.233333	0.37	0.28	0.4	0.17	0.32	up
chr9:139179390:139179569:+@chr9:139181684|139182047:139183028:+	GRIN1	0.32	0.3	0.3	0.45	0.47	0.39	0.306667	0.436667	0.32	0.47	0.3	0.39	up
chr9:19116307:19116108|19115967:-@chr9:19113281:19113645:-	PLIN2	0.34	0.34	0.44	0.59	0.64	0.59	0.373333	0.606667	0.44	0.64	0.34	0.59	up
chr9:23691377:23691602:-@chr9:23683446:23683484:-@chr9:23680099:23682882:-	ELAVL2	0.17	0.04	0.11	0.2	0.22	0.26	0.106667	0.226667	0.17	0.26	0.04	0.2	up
chr9:34636659:34637255:+@chr9:34637472|34637538:34637564:+	GALT	0.18	0.21	0.31	0.43	0.34	0.36	0.233333	0.376667	0.31	0.43	0.18	0.34	up
chr9:35091276:35091132|35091121:-@chr9:35090929:35091003:-	STOML2	0.19	0.18	0.23	0.27	0.45	0.53	0.2	0.416667	0.23	0.53	0.18	0.27	up
chr9:35722993:35723144:+@chr9:35723214:35723279:+	CREB3	0.33	0.08	0.45	0.55	0.58	0.77	0.286667	0.633333	0.45	0.77	0.08	0.55	up
chr9:41944749:41945140:-@chr9:41944605|41944633:41944504:-		0.6	0.76	0.51	0.8	0.8	0.83	0.623333	0.81	0.76	0.83	0.51	0.8	up
chr9:4615566:4615327|4615217:-@chr9:4612408:4612510:-	SPATA6L	0.3	0.24	0.24	0.43	0.41	0.54	0.26	0.46	0.3	0.54	0.24	0.41	up
chr9:7093685:7093870:+@chr9:7095402:7095500:+@chr9:7118066:7118236:+	KDM4C	0.15	0.2	0.17	0.32	0.23	0.29	0.173333	0.28	0.2	0.32	0.15	0.23	up
chr9:76874631:76874778:-@chr9:76873732:76873838:-	NMRK1	0.35	0.12	0.15	0.49	0.46	0.38	0.206667	0.443333	0.35	0.49	0.12	0.38	up
chr9:94909777:94909930:+@chr9:94912671|94914321:94914392:+	CARD19	0.35	0.29	0.3	0.51	0.38	0.41	0.313333	0.433333	0.35	0.51	0.29	0.38	up
chr9:98324609:98324706:-@chr9:98311776:98311892:-@chr9:98302211:98305892:-	CDC14B	0.41	0.45	0.25	0.48	0.57	0.49	0.37	0.513333	0.45	0.57	0.25	0.48	up
chrX:100193462:100193760:-@chrX:100179562:100179696:-@chrX:100178619:100178718:-	TRMT2B	0.49	0.48	0.45	0.8	0.62	0.68	0.473333	0.7	0.49	0.8	0.45	0.62	up
chrX:100193462:100193760:-@chrX:100183687:100183957:-@chrX:100182962:100183016:-	TRMT2B	0.45	0.56	0.6	0.64	0.65	0.8	0.536667	0.696667	0.6	0.8	0.45	0.64	up
chrX:100759016:100758938|100758929:-@chrX:100756764:100758412:-	ARMCX6	0.25	0.35	0.25	0.39	0.36	0.42	0.283333	0.39	0.35	0.42	0.25	0.36	up
chrX:102820184:102820085|102820079:-@chrX:102817078:102818635:-	MORF4L2	0.41	0.46	0.44	0.53	0.61	0.52	0.436667	0.553333	0.46	0.61	0.41	0.52	up
chrX:118647309:118647499:-@chrX:118636704:118636777:-@chrX:118633715:118634733:-	SEPT6	0.15	0.12	0.13	0.41	0.25	0.57	0.133333	0.41	0.15	0.57	0.12	0.25	up
chrX:153238996:153239185:-@chrX:153238813:153238836:-@chrX:153236387:153236634:-	FLNA	0.5	0.49	0.48	0.63	0.63	0.63	0.49	0.63	0.5	0.63	0.48	0.63	up
chrX:153393375:153393398:-@chrX:153390170|153390336:153389999:-	FAM3A	0.4	0.23	0.33	0.61	0.42	0.46	0.32	0.496667	0.4	0.61	0.23	0.42	up
chrX:16640766:16641081:-@chrX:16637768:16637884:-@chrX:16636463:16636562:-@chrX:16630781:16630985:-	CTPS2	0.21	0.31	0.31	0.33	0.36	0.57	0.276667	0.42	0.31	0.57	0.21	0.33	up
chrX:19271932:19272133:+@chrX:19273775:19273858:+@chrX:19274549:19274662:+@chrX:19277351:19277410:+	PDHA1	0.4	0.52	0.49	0.54	0.69	0.75	0.47	0.66	0.52	0.75	0.4	0.54	up
chrX:31062140:31062232:-@chrX:31054680:31054711:-@chrX:31047255:31049968:-	DMD	0.18	0.1	0.2	0.32	0.41	0.31	0.16	0.346667	0.2	0.41	0.1	0.31	up
chrX:47212103:47211753|47211667:-@chrX:47200615:47200757:-	ZNF41	0.15	0.06	0.07	0.17	0.2	0.23	0.0933333	0.2	0.15	0.23	0.06	0.17	up
chrX:48935164:48934839|48934834:-@chrX:48931201:48932679:-	SYP	0.57	0.47	0.4	0.73	0.6	0.63	0.48	0.653333	0.57	0.73	0.4	0.6	up
chrX:64671085:64671416:-@chrX:64670215:64670340:-@chrX:64669166:64669235:-	LAS1L	0.74	0.71	0.72	0.97	0.98	0.96	0.723333	0.97	0.74	0.98	0.71	0.96	up
chrX:70427204:70427381|70427368:+@chrX:70428354:70428547:+	NONO	0.33	0.41	0.32	0.58	0.43	0.43	0.353333	0.48	0.41	0.58	0.32	0.43	up
chrY:15243283:15243865:+@chrY:15340733:15340792:+@chrY:15344391:15344543:+	NLGN4Y	0.45	0.33	0.43	0.73	0.8	0.83	0.403333	0.786667	0.45	0.83	0.33	0.73	up
chrY:20209644:20209924:+@chrY:20210795|20210801:20210886:+		0.36	0.44	0.35	0.67	0.5	0.6	0.383333	0.59	0.44	0.67	0.35	0.5	up
chr10:100183730:100183838:-@chr10:100180878:100181038:-@chr10:100180249:100180417:-	MIR4685,HPS1	0.9	0.83	0.85	0.76	0.75	0.71	0.86	0.74	0.9	0.76	0.83	0.71	down
chr10:103337951:103338048:-@chr10:103336869:103336931:-@chr10:103335609:103335903:-	POLL	0.61	0.75	0.38	0.31	0.15	0.32	0.58	0.26	0.75	0.32	0.38	0.15	down
chr10:103337951:103338048:-@chr10:103336869:103336947:-@chr10:103335609:103335903:-	POLL	0.7	0.7	0.61	0.34	0.09	0.39	0.67	0.273333	0.7	0.39	0.61	0.09	down
chr10:103337951:103338048:-@chr10:103336993:103337129:-@chr10:103335609:103335903:-	POLL	0.93	0.89	0.87	0.7	0.72	0.83	0.896667	0.75	0.93	0.83	0.87	0.7	down
chr10:105757925:105758104:+@chr10:105760564:105760656:+@chr10:105767908:105768037:+	SLK	0.79	0.85	0.82	0.44	0.18	0.27	0.82	0.296667	0.85	0.44	0.79	0.18	down
chr10:111627538:111627615:-@chr10:111625276:111625347:-	XPNPEP1	0.72	0.47	0.55	0.35	0.29	0.26	0.58	0.3	0.72	0.35	0.47	0.26	down
chr10:114701154:114701356:+@chr10:114714305:114714373:+@chr10:114789774:114789879:+	TCF7L2	0.59	0.52	0.73	0.35	0.37	0.51	0.613333	0.41	0.73	0.51	0.52	0.35	down
chr10:123269483:123269715:-@chr10:123268186:123268333:-@chr10:123266823:123266967:-	FGFR2	0.84	0.86	0.69	0.51	0.55	0.35	0.796667	0.47	0.86	0.55	0.69	0.35	down
chr10:127404241:127404397:+@chr10:127407562:127407663:+@chr10:127407917:127408038:+	EDRF1	0.51	0.58	0.61	0.32	0.27	0.33	0.566667	0.306667	0.61	0.33	0.51	0.27	down
chr10:127575098:127575214:+@chr10:127658720:127658884:+@chr10:127667110:127674057:+	FANK1	0.82	0.7	0.85	0.63	0.46	0.65	0.79	0.58	0.85	0.65	0.7	0.46	down
chr10:127667110:127667234:+@chr10:127673976:127674057:+	FANK1	0.67	0.45	0.49	0.37	0.4	0.25	0.536667	0.34	0.67	0.4	0.45	0.25	down
chr10:129759062:129759995:+@chr10:129760392:129760468:+	PTPRE	0.57	0.5	0.49	0.33	0.29	0.28	0.52	0.3	0.57	0.33	0.49	0.28	down
chr10:22647207:22647245:+@chr10:22647593:22647648:+	COMMD3,BMI1	0.52	0.67	0.54	0.41	0.38	0.49	0.576667	0.426667	0.67	0.49	0.52	0.38	down
chr10:31179157:31179302:-@chr10:31177466:31178378:-	ZNF438	0.82	0.79	0.82	0.67	0.68	0.77	0.81	0.706667	0.82	0.77	0.79	0.67	down
chr10:35830435:35830469:+@chr10:35845457:35845557:+@chr10:35854898:35854933:+	CCNY	0.58	0.57	0.59	0.38	0.48	0.44	0.58	0.433333	0.59	0.48	0.57	0.38	down
chr10:42366011:42368267:-@chr10:42340994:42341114:-@chr10:42339066:42339192:-	ZNF37BP	0.33	0.53	0.4	0.18	0.17	0.16	0.42	0.17	0.53	0.18	0.33	0.16	down
chr10:45600963:45601085:+@chr10:45602066:45602128:+@chr10:45602489:45602701:+	FAM21C	0.26	0.2	0.3	0.16	0.07	0.17	0.253333	0.133333	0.3	0.17	0.2	0.07	down
chr10:51283224:51283317:-@chr10:51282910:51282994:-@chr10:51280399:51280431:-@chr10:51276280:51277104:-		0.84	0.86	0.86	0.67	0.79	0.68	0.853333	0.713333	0.86	0.79	0.84	0.67	down
chr10:64646973:64647097:-@chr10:64645383|64645462:64645319:-	JMJD1C	0.79	0.84	0.83	0.6	0.59	0.74	0.82	0.643333	0.84	0.74	0.79	0.59	down
chr10:69957009:69957789:-@chr10:69946948|69947028:69946847:-	SLC25A16	0.79	0.69	0.79	0.6	0.61	0.58	0.756667	0.596667	0.79	0.61	0.69	0.58	down
chr10:70166639:70166811:+@chr10:70167608:70167652:+@chr10:70172191:70172332:+@chr10:70176924:70177038:+	CCAR1	0.64	0.71	0.67	0.5	0.55	0.59	0.673333	0.546667	0.71	0.59	0.64	0.5	down
chr10:70342924:70343045|70343041:+@chr10:70343112:70343338:+	DDX50	0.54	0.55	0.62	0.42	0.35	0.42	0.57	0.396667	0.62	0.42	0.54	0.35	down
chr10:73765544:73765695:-@chr10:73764269:73764381:-	DNAJB12	0.35	0.38	0.5	0.23	0.25	0.24	0.41	0.24	0.5	0.25	0.35	0.23	down
chr10:73765695:73765544|73765367:-@chr10:73762594:73764381:-	DNAJB12	0.31	0.38	0.29	0.26	0.22	0.15	0.326667	0.21	0.38	0.26	0.29	0.15	down
chr10:91188341:91188920:-@chr10:91185797:91186056:-	SLC16A12	0.39	0.35	0.47	0.27	0.3	0.23	0.403333	0.266667	0.47	0.3	0.35	0.23	down
chr10:99202162:99203410:+@chr10:99203546:99203593:+@chr10:99204461:99204546:+	ZDHHC16	0.92	0.95	0.93	0.74	0.84	0.79	0.933333	0.79	0.95	0.84	0.92	0.74	down
chr10:99203546:99204546:+@chr10:99205386|99205407:99205530:+	ZDHHC16	0.41	0.44	0.35	0.33	0.15	0.15	0.4	0.21	0.44	0.33	0.35	0.15	down
chr10:99203546:99204546:+@chr10:99205386|99205461:99205530:+	ZDHHC16	0.8	0.83	0.87	0.66	0.54	0.55	0.833333	0.583333	0.87	0.66	0.8	0.54	down
chr10:99488209:99488421:+@chr10:99498016:99498111:+@chr10:99499221:99499333:+	ZFYVE27	0.8	0.8	0.68	0.64	0.4	0.64	0.76	0.56	0.8	0.64	0.68	0.4	down
chr11:101581834:101582015:+@chr11:101585458:101585505:+@chr11:101599563:101599693:+	YAP1	0.52	0.48	0.49	0.33	0.29	0.36	0.496667	0.326667	0.52	0.36	0.48	0.29	down
chr11:10738296:10738444:+@chr11:10740070:10740177:+@chr11:10741554:10741661:+	CTR9	0.74	0.77	0.84	0.62	0.49	0.67	0.783333	0.593333	0.84	0.67	0.74	0.49	down
chr11:111569407:111569630:+@chr11:111569812:111569927:+	BCO2	0.49	0.46	0.22	0.2	0.13	0.15	0.39	0.16	0.49	0.2	0.22	0.13	down
chr11:113199537:113199632:-@chr11:113193590:113193626:-@chr11:113191106:113191314:-	USP28	0.72	0.77	0.83	0.5	0.68	0.57	0.773333	0.583333	0.83	0.68	0.72	0.5	down
chr11:118477415:118478334:-@chr11:118476938:118476967:-@chr11:118476550:118476763:-	DPAGT1	0.72	0.81	0.87	0.57	0.47	0.68	0.8	0.573333	0.87	0.68	0.72	0.47	down
chr11:124174977:124175921:-@chr11:124149924|124149937:124149825:-	MSANTD2	0.34	0.28	0.46	0.13	0.13	0.15	0.36	0.136667	0.46	0.15	0.28	0.13	down
chr11:124174977:124175921:-@chr11:124149924|124150080:124149825:-	MSANTD2	0.93	0.9	0.88	0.8	0.72	0.66	0.903333	0.726667	0.93	0.8	0.88	0.66	down
chr11:124174977:124175921:-@chr11:124154156:124154245:-@chr11:124149825:124150080:-	MSANTD2	0.67	0.73	0.59	0.3	0.31	0.33	0.663333	0.313333	0.73	0.33	0.59	0.3	down
chr11:124460834:124461124:+@chr11:124461310:124461366:+@chr11:124463225:124465854:+	SLC37A2	0.69	0.88	0.83	0.18	0.2	0.64	0.8	0.34	0.88	0.64	0.69	0.18	down
chr11:125644094:125644396:+@chr11:125647583:125647787:+@chr11:125648074:125648559:+	FOXRED1	0.26	0.31	0.55	0.23	0.11	0.2	0.373333	0.18	0.55	0.23	0.26	0.11	down
chr11:129497333:129497618:+@chr11:129498717:129498884:+@chr11:129501805:129501935:+	APLP2	0.67	0.66	0.68	0.39	0.41	0.4	0.67	0.4	0.68	0.41	0.66	0.39	down
chr11:27617968:27618128:+@chr11:27636361|27636364:27636585:+	BDNF-AS	0.63	0.54	0.44	0.41	0.26	0.39	0.536667	0.353333	0.63	0.41	0.44	0.26	down
chr11:3355423:3355706:-@chr11:3351383:3351447:-@chr11:3349383:3349509:-	ZNF195	0.42	0.65	0.39	0.34	0.34	0.36	0.486667	0.346667	0.65	0.36	0.39	0.34	down
chr11:35167785:35168188:+@chr11:35174869:35174997:+@chr11:35176244:35176369:+	CD44	0.21	0.24	0.24	0.08	0.1	0.15	0.23	0.11	0.24	0.15	0.21	0.08	down
chr11:35167785:35168188:+@chr11:35176244:35176369:+@chr11:35179205:35179318:+	CD44	0.88	0.88	0.86	0.59	0.25	0.18	0.873333	0.34	0.88	0.59	0.86	0.18	down
chr11:35167785:35168188:+@chr11:35176244:35176369:+@chr11:35188088:35188177:+@chr11:35192975:35193037:+	CD44	0.93	0.93	0.92	0.85	0.57	0.45	0.926667	0.623333	0.93	0.85	0.92	0.45	down
chr11:35167785:35168188:+@chr11:35176244|35176271:35176369:+	CD44	0.96	0.97	0.93	0.88	0.69	0.44	0.953333	0.67	0.97	0.88	0.93	0.44	down
chr11:35167785:35168188:+@chr11:35176271:35176369:+@chr11:35179205:35179318:+	CD44	0.44	0.49	0.61	0.12	0.04	0.05	0.513333	0.07	0.61	0.12	0.44	0.04	down
chr11:35167785:35168188:+@chr11:35182635:35182763:+@chr11:35184235:35184366:+	CD44	0.82	0.94	0.95	0.58	0.53	0.51	0.903333	0.54	0.95	0.58	0.82	0.51	down
chr11:35167785:35168188:+@chr11:35184235:35184366:+@chr11:35186228:35186329:+	CD44	0.22	0.24	0.22	0.07	0.05	0.08	0.226667	0.0666667	0.24	0.08	0.22	0.05	down
chr11:35167785:35168188:+@chr11:35188088:35188177:+@chr11:35189369:35190301:+	CD44	0.98	0.98	0.96	0.92	0.78	0.83	0.973333	0.843333	0.98	0.92	0.96	0.78	down
chr11:35167958:35168095:+@chr11:35189369:35189572:+@chr11:35192975:35193037:+	CD44	0.9	0.86	0.87	0.59	0.65	0.69	0.876667	0.643333	0.9	0.69	0.86	0.59	down
chr11:35179205:35179318:+@chr11:35179791:35179910:+@chr11:35182635:35182782:+	CD44	0.95	0.93	0.93	0.73	0.76	0.6	0.936667	0.696667	0.95	0.76	0.93	0.6	down
chr11:35179205:35179318:+@chr11:35179794:35179910:+@chr11:35182635:35182782:+	CD44	0.94	0.91	0.94	0.74	0.76	0.62	0.93	0.706667	0.94	0.76	0.91	0.62	down
chr11:35182635:35182763:+@chr11:35184238:35184366:+@chr11:35186228:35186329:+	CD44	0.91	0.9	0.92	0.78	0.66	0.67	0.91	0.703333	0.92	0.78	0.9	0.66	down
chr11:410463:410615:-@chr11:409582:409729:-	ANO9	0.69	0.68	0.57	0.42	0.46	0.4	0.646667	0.426667	0.69	0.46	0.57	0.4	down
chr11:45913763:45913882:-@chr11:45913248:45913373:-@chr11:45907446:45912352:-	PHF21A	0.32	0.17	0.2	0.16	0.09	0.06	0.23	0.103333	0.32	0.16	0.17	0.06	down
chr11:46344370:46345110|46344652:+@chr11:46345417:46345525:+	DGKZ	0.79	0.82	0.78	0.63	0.72	0.73	0.796667	0.693333	0.82	0.73	0.78	0.63	down
chr11:47227025:47227126:+@chr11:47237918:47238106:+@chr11:47239368:47240145:+	NR1H3	0.7	0.79	0.64	0.57	0.57	0.53	0.71	0.556667	0.79	0.57	0.64	0.53	down
chr11:47239368:47239576:+@chr11:47239674:47240145:+	NR1H3	0.37	0.26	0.25	0.21	0.21	0.15	0.293333	0.19	0.37	0.21	0.25	0.15	down
chr11:47605208:47605255:-@chr11:47603802:47603869:-@chr11:47600829:47600904:-	MTCH2	0.89	0.87	0.88	0.86	0.69	0.77	0.88	0.773333	0.89	0.86	0.87	0.69	down
chr11:5573908:5573987:+@chr11:5581052:5581541:+@chr11:5582340:5582483:+	TRIM6,TRIM6-TRIM34,TRIM34	0.86	0.87	0.85	0.79	0.79	0.67	0.86	0.75	0.87	0.79	0.85	0.67	down
chr11:5675054:5675149:+@chr11:5676133:5676351:+	TRIM22	0.74	0.69	0.74	0.68	0.48	0.62	0.723333	0.593333	0.74	0.68	0.69	0.48	down
chr11:57339439:57339548:+@chr11:57339963:57340049:+@chr11:57340345:57343233:+	CTNND1	0.2	0.19	0.2	0.09	0.07	0.09	0.196667	0.0833333	0.2	0.09	0.19	0.07	down
chr11:58667546:58669905:+@chr11:58672846|58672885:58673002:+	FAM111A	0.76	0.68	0.76	0.65	0.5	0.61	0.733333	0.586667	0.76	0.65	0.68	0.5	down
chr11:60888300:60888363:+@chr11:60888481:60888566:+	TMEM138	0.87	0.91	0.93	0.85	0.73	0.66	0.903333	0.746667	0.93	0.85	0.87	0.66	down
chr11:62201788:62201880:-@chr11:62201566:62201682:-	UBXN1	0.21	0.48	0.23	0.2	0.16	0.1	0.306667	0.153333	0.48	0.2	0.21	0.1	down
chr11:63412564:63413012:+@chr11:63414270:63414343:+@chr11:63419207:63419386:+	MARK2	0.2	0.18	0.25	0.1	0.07	0.09	0.21	0.0866667	0.25	0.1	0.18	0.07	down
chr11:63750338:63751180:+@chr11:63753295:63753392:+@chr11:63753526:63754063:+	NUDT22	0.79	0.76	0.71	0.63	0.53	0.62	0.753333	0.593333	0.79	0.63	0.71	0.53	down
chr11:64636563:64636759:+@chr11:64636859:64636942:+@chr11:64637268:64637462:+	TM7SF2	0.61	0.78	0.58	0.45	0.44	0.36	0.656667	0.416667	0.78	0.45	0.58	0.36	down
chr11:65105586:65106012:+@chr11:65107639:65107812:+@chr11:65108288:65108445:+	EHBP1L1	0.76	0.82	0.75	0.58	0.55	0.58	0.776667	0.57	0.82	0.58	0.75	0.55	down
chr11:65186226:65186252:-@chr11:65185984:65186037:-	RELA	0.55	0.59	0.53	0.4	0.36	0.44	0.556667	0.4	0.59	0.44	0.53	0.36	down
chr11:65186226:65186252:-@chr11:65185984:65186133:-	RELA	0.22	0.2	0.26	0.13	0.07	0.08	0.226667	0.0933333	0.26	0.13	0.2	0.07	down
chr11:65526087:65526212:-@chr11:65524528|65524552:65524350:-	EIF1AD	0.52	0.4	0.47	0.34	0.33	0.3	0.463333	0.323333	0.52	0.34	0.4	0.3	down
chr11:6589342:6589625:-@chr11:6589195:6589259:-	TAF10	0.68	0.78	0.68	0.67	0.49	0.31	0.713333	0.49	0.78	0.67	0.68	0.31	down
chr11:66807175:66807275:+@chr11:66807754|66807901:66807996:+	GRK2	0.89	0.89	0.84	0.76	0.76	0.63	0.873333	0.716667	0.89	0.76	0.84	0.63	down
chr11:68602936:68603064:+@chr11:68603878:68603927:+@chr11:68605444:68605543:+	TPCN2	0.85	0.9	0.85	0.66	0.74	0.55	0.866667	0.65	0.9	0.74	0.85	0.55	down
chr11:69199139:69199365:-@chr11:69195698:69195768:-@chr11:69191455:69191961:-	ORAOV1	0.91	0.86	0.91	0.82	0.6	0.77	0.893333	0.73	0.91	0.82	0.86	0.6	down
chr11:69901784:69901949:+@chr11:69905842:69905908:+@chr11:69906757:69908511:+	PPFIA1	0.82	0.86	0.78	0.6	0.71	0.75	0.82	0.686667	0.86	0.75	0.78	0.6	down
chr11:763629:763522|763428:-@chr11:762427:762521:-	PDDC1	0.23	0.17	0.15	0.09	0.09	0.06	0.183333	0.08	0.23	0.09	0.15	0.06	down
chr11:95144417:95144462:-@chr11:95141767:95141799:-	FAM76B	0.5	0.5	0.67	0.44	0.42	0.48	0.556667	0.446667	0.67	0.48	0.5	0.42	down
chr11:95172044:95172200:+@chr11:95185716|95185764:95185923:+	CEP57	0.44	0.45	0.54	0.38	0.24	0.3	0.476667	0.306667	0.54	0.38	0.44	0.24	down
chr12:105904877:105905073:-@chr12:105903123|105903133:105903023:-	MTERF2	0.76	0.81	0.76	0.63	0.66	0.61	0.776667	0.633333	0.81	0.66	0.76	0.61	down
chr12:108495509:108496061:+@chr12:108496997|108497006:108497088:+	MVK	0.77	0.75	0.7	0.49	0.68	0.66	0.74	0.61	0.77	0.68	0.7	0.49	down
chr12:112882053:112882091:-@chr12:112881400:112881592:-@chr12:112879970:112880238:-	RBM19	0.82	0.84	0.82	0.8	0.68	0.65	0.826667	0.71	0.84	0.8	0.82	0.65	down
chr12:120724920:120726042:-@chr12:120724092|120724097:120723996:-	LINC01089	0.87	0.87	0.83	0.73	0.61	0.55	0.856667	0.63	0.87	0.73	0.83	0.55	down
chr12:120977094:120977278|120977215:+@chr12:120981381:120984334:+	BCL7A	0.23	0.2	0.32	0.16	0.12	0.16	0.25	0.146667	0.32	0.16	0.2	0.12	down
chr12:121473021:121473128:-@chr12:121467827:121467963:-@chr12:121450632:121450743:-@chr12:121430868:121431058:-	CLIP1	0.7	0.78	0.7	0.6	0.61	0.49	0.726667	0.566667	0.78	0.61	0.7	0.49	down
chr12:122027371:122027666|122027463:+@chr12:122028825:122029069:+	OGFOD2	0.39	0.35	0.54	0.14	0.25	0.23	0.426667	0.206667	0.54	0.25	0.35	0.14	down
chr12:122028481:122028591|122028557:+@chr12:122028860:122029069:+	OGFOD2	0.48	0.46	0.47	0.15	0.41	0.34	0.47	0.3	0.48	0.41	0.46	0.15	down
chr12:122372195:122372232:-@chr12:122372035:122372061:-	SBNO1,MIR8072	0.6	0.63	0.58	0.41	0.46	0.53	0.603333	0.466667	0.63	0.53	0.58	0.41	down
chr12:132042902:132042965:-@chr12:132034807:132034929:-@chr12:132031467:132032456:-	ZNF605	0.72	0.58	0.58	0.43	0.56	0.44	0.626667	0.476667	0.72	0.56	0.58	0.43	down
chr12:132217271:132217673:+@chr12:132230179:132230281:+@chr12:132231093:132231184:+	ZNF268,ZNF10	0.77	0.71	0.74	0.39	0.46	0.46	0.74	0.436667	0.77	0.46	0.71	0.39	down
chr12:30760709:30760877:-@chr12:30759282|30759342:30759160:-	CAPRIN2	0.67	0.68	0.81	0.38	0.39	0.18	0.72	0.316667	0.81	0.39	0.67	0.18	down
chr12:45896434:45896537:-@chr12:45896215:45896314:-@chr12:45888470:45890811:-	PCED1B-AS1	0.83	0.83	0.84	0.81	0.7	0.5	0.833333	0.67	0.84	0.81	0.83	0.5	down
chr12:48847151:48847554:-@chr12:48827376:48827453:-@chr12:48824819:48825111:-@chr12:48824002:48824107:-	CERS5	0.66	0.79	0.7	0.26	0.64	0.41	0.716667	0.436667	0.79	0.64	0.66	0.26	down
chr12:51851933:51852039:-@chr12:51851228:51851492:-@chr12:51850474:51850553:-	CSAD	0.49	0.61	0.54	0.26	0.12	0.28	0.546667	0.22	0.61	0.28	0.49	0.12	down
chr12:52180972:52181512:+@chr12:52183078:52183263:+@chr12:52183764:52184446:+	TARBP2	0.77	0.81	0.81	0.56	0.67	0.65	0.796667	0.626667	0.81	0.67	0.77	0.56	down
chr12:54620133:54620221|54620219:+@chr12:54620365:54620773:+	DGKA	0.96	0.92	0.85	0.81	0.79	0.81	0.91	0.803333	0.96	0.81	0.85	0.79	down
chr12:54637237:54637722:-@chr12:54637000:54637110:-@chr12:54636154:54636270:-	PMEL	0.7	0.78	0.65	0.63	0.37	0.55	0.71	0.516667	0.78	0.63	0.65	0.37	down
chr12:54677215:54677390:+@chr12:54679384:54679509:+@chr12:54682263:54682771:+	SUOX	0.72	0.55	0.58	0.26	0.51	0.36	0.616667	0.376667	0.72	0.51	0.55	0.26	down
chr12:54844699:54844782:-@chr12:54844354:54844419:-	SMARCC2	0.81	0.7	0.77	0.62	0.57	0.69	0.76	0.626667	0.81	0.69	0.7	0.57	down
chr12:55443249:55443465:+@chr12:55453885|55453890:55454216:+	HSD17B6	0.82	0.91	0.86	0.71	0.81	0.34	0.863333	0.62	0.91	0.81	0.82	0.34	down
chr12:56197756:56200612:-@chr12:56197569|56197592:56197319:-	MIR616,DDIT3	0.93	0.84	0.81	0.76	0.79	0.52	0.86	0.69	0.93	0.79	0.81	0.52	down
chr12:56432225:56432509:-@chr12:56431742|56431746:56431550:-	CDK4	0.89	0.92	0.88	0.82	0.75	0.71	0.896667	0.76	0.92	0.82	0.88	0.71	down
chr12:64825888:64826005:-@chr12:64818771:64818781:-@chr12:64815893:64818213:-	TMBIM4,TMBIM4	0.92	0.85	0.81	0.79	0.68	0.71	0.86	0.726667	0.92	0.79	0.81	0.68	down
chr12:6493692:6493823:+@chr12:6493891:6494014:+	NCAPD2	0.35	0.33	0.34	0.2	0.17	0.13	0.34	0.166667	0.35	0.2	0.33	0.13	down
chr12:67366064:67365910|67365906:-@chr12:67354418:67355868:-	LOC100507250	0.4	0.58	0.51	0.24	0.32	0.37	0.496667	0.31	0.58	0.37	0.4	0.24	down
chr12:68990942:68991064:+@chr12:68999345:68999411:+@chr12:69012814:69012893:+@chr12:69015485:69015841:+	CNOT2	0.44	0.51	0.49	0.39	0.35	0.38	0.48	0.373333	0.51	0.39	0.44	0.35	down
chr12:79763640:79763849:-@chr12:79729375:79729593:-@chr12:79710430:79715636:-	MIR617,LIN7A	0.59	0.56	0.52	0.43	0.43	0.45	0.556667	0.436667	0.59	0.45	0.52	0.43	down
chr12:9699736:9699842:+@chr12:9700431:9700560:+@chr12:9700784:9702285:+	LOC374443,CLEC2D	0.4	0.38	0.35	0.3	0.28	0.2	0.376667	0.26	0.4	0.3	0.35	0.2	down
chr12:97513342:97513570|97513466:+@chr12:97515765:97516926:+	SLC25A3	0.75	0.85	0.78	0.62	0.65	0.63	0.793333	0.633333	0.85	0.65	0.75	0.62	down
chr13:110074582:110074627:+@chr13:110075538:110075651:+@chr13:110077787:110078190:+	NAXD	0.75	0.71	0.78	0.67	0.58	0.66	0.746667	0.636667	0.78	0.67	0.71	0.58	down
chr13:110356381:110356472:-@chr13:110350878:110351042:-@chr13:110344633:110344741:-@chr13:110344457:110344550:-	ANKRD10	0.52	0.53	0.48	0.36	0.46	0.39	0.51	0.403333	0.53	0.46	0.48	0.36	down
chr13:110655637:110655721:+@chr13:110659614:110659694:+@chr13:110660220:110660350:+	ARHGEF7	0.1	0.31	0.25	0.08	0.03	0.07	0.22	0.06	0.31	0.08	0.1	0.03	down
chr13:113192983:113193269:-@chr13:113191406:113191489:-@chr13:113186156:113186512:-	DCUN1D2	0.24	0.19	0.33	0.08	0.17	0.14	0.253333	0.13	0.33	0.17	0.19	0.08	down
chr13:22837305:22837416:-@chr13:22830474:22830620:-@chr13:22826658:22828146:-	SACS	0.92	0.89	0.86	0.75	0.71	0.85	0.89	0.77	0.92	0.85	0.86	0.71	down
chr13:24364781:24365007:-@chr13:24361454:24361538:-@chr13:24357744:24357808:-	CENPJ	0.76	0.79	0.8	0.73	0.46	0.6	0.783333	0.596667	0.8	0.73	0.76	0.46	down
chr13:25691594:25691804:-@chr13:25690725|25690740:25690648:-	RNF6	0.33	0.43	0.75	0.32	0.32	0.29	0.503333	0.31	0.75	0.32	0.33	0.29	down
chr13:26922646:26922749:-@chr13:26921989:26922055:-@chr13:26916633:26917293:-	MTIF3	0.31	0.46	0.45	0.23	0.23	0.24	0.406667	0.233333	0.46	0.24	0.31	0.23	down
chr13:40298642:40298730:-@chr13:40277166:40277338:-@chr13:40269124:40272860:-		0.43	0.38	0.44	0.33	0.28	0.27	0.416667	0.293333	0.44	0.33	0.38	0.27	down
chr13:45654247:45654483:-@chr13:45652220:45652254:-@chr13:45632682:45632806:-@chr13:45629902:45631822:-	LCP1	0.52	0.51	0.74	0.36	0.38	0.31	0.59	0.35	0.74	0.38	0.51	0.31	down
chr13:49516788:49516905:-@chr13:49501415:49501629:-@chr13:49498430:49499543:-	DLEU2,MIR15A	0.77	0.77	0.76	0.64	0.63	0.5	0.766667	0.59	0.77	0.64	0.76	0.5	down
chr13:51271671:51271860:-@chr13:51269963:51270045:-@chr13:51263302:51263394:-	DHRS12	0.71	0.72	0.73	0.57	0.7	0.56	0.72	0.61	0.73	0.7	0.71	0.56	down
chr13:51608253:51608396:-@chr13:51607866:51608000:-@chr13:51605826:51605952:-	NEK3	0.74	0.83	0.76	0.58	0.62	0.5	0.776667	0.566667	0.83	0.62	0.74	0.5	down
chr13:75306363:75306524:+@chr13:75307289|75307370:75307476:+	LMO7	0.49	0.54	0.56	0.34	0.33	0.29	0.53	0.32	0.56	0.34	0.49	0.29	down
chr13:96807737:96807890:+@chr13:96816714:96816808:+@chr13:96841577:96844377:+	MBNL2	0.85	0.79	0.8	0.7	0.61	0.74	0.813333	0.683333	0.85	0.74	0.79	0.61	down
chr14:104251585:104252238:+@chr14:104252666:104252722:+@chr14:104256177:104256994:+	INF2	0.93	0.93	0.94	0.67	0.73	0.68	0.933333	0.693333	0.94	0.73	0.93	0.67	down
chr14:105948648:105948971:-@chr14:105280495|105280525:105280159:-	MIR4539,,,,,,MIR4537	0.53	0.47	0.59	0.38	0.29	0.38	0.53	0.35	0.59	0.38	0.47	0.29	down
chr14:23830602:23830671:-@chr14:23830185:23830265:-	DHRS1	0.42	0.41	0.65	0.19	0.29	0.33	0.493333	0.27	0.65	0.33	0.41	0.19	down
chr14:23849695:23851084:-@chr14:23849453:23849594:-@chr14:23847525:23847876:-	CIDEB	0.16	0.14	0.27	0.1	0.05	0.09	0.19	0.08	0.27	0.1	0.14	0.05	down
chr14:36030157:36030247:-@chr14:36016672:36016834:-@chr14:36015562:36016059:-	SFTA3	0.67	0.75	0.7	0.63	0.59	0.52	0.706667	0.58	0.75	0.63	0.67	0.52	down
chr14:38708970:38709794:-@chr14:38707046:38707168:-@chr14:38702201:38702316:-@chr14:38697240:38698505:-	TRAPPC6B	0.31	0.38	0.31	0.26	0.1	0.3	0.333333	0.22	0.38	0.3	0.31	0.1	down
chr14:38815181:38816020:+@chr14:38818292:38818313:+@chr14:38818404:38818492:+	MIA2	0.92	0.91	0.93	0.79	0.89	0.75	0.92	0.81	0.93	0.89	0.91	0.75	down
chr14:57834426:57834610:-@chr14:57830237:57832282:-@chr14:57829785:57830015:-@chr14:57828106:57828178:-	PSMA3-AS1,C14orf37	0.6	0.65	0.61	0.46	0.57	0.49	0.62	0.506667	0.65	0.57	0.6	0.46	down
chr14:64613899:64613831|64613815:-@chr14:64611593:64613134:-	MAX	0.42	0.34	0.48	0.23	0.27	0.33	0.413333	0.276667	0.48	0.33	0.34	0.23	down
chr14:68727873:68728061:+@chr14:68740387:68740470:+@chr14:68745894:68746935:+	EXD2	0.88	0.86	0.89	0.7	0.78	0.78	0.876667	0.753333	0.89	0.78	0.86	0.7	down
chr14:72818820:72818966:-@chr14:72815742:72815885:-@chr14:72811568:72813754:-	NUMB,LOC101928143	0.63	0.64	0.62	0.51	0.48	0.48	0.63	0.49	0.64	0.51	0.62	0.48	down
chr14:73577021:73577101:+@chr14:73582516:73582586:+@chr14:73584386:73585066:+	BBOF1	0.76	0.8	0.73	0.67	0.61	0.62	0.763333	0.633333	0.8	0.67	0.73	0.61	down
chr14:76856530:76856981:-@chr14:76848045:76848129:-@chr14:76842342:76842537:-	POMT2	0.94	0.88	0.91	0.77	0.87	0.74	0.91	0.793333	0.94	0.87	0.88	0.74	down
chr14:77435196:77435354:+@chr14:77443899:77444015:+@chr14:77460553:77460702:+	ADCK1	0.75	0.77	0.77	0.61	0.33	0.64	0.763333	0.526667	0.77	0.64	0.75	0.33	down
chr14:88145364:88145500:+@chr14:88145809|88145812:88145900:+	ZC3H14	0.6	0.64	0.71	0.52	0.56	0.54	0.65	0.54	0.71	0.56	0.6	0.52	down
chr14:95199346:95201166:+@chr14:95204216:95204670:+@chr14:95205641:95205707:+	TCL6	0.81	0.63	0.58	0.39	0.53	0.44	0.673333	0.453333	0.81	0.53	0.58	0.39	down
chr15:32416825:32417554:-@chr15:32416094|32416160:32415903:-	SLC12A6	0.9	0.75	0.85	0.44	0.73	0.74	0.833333	0.636667	0.9	0.74	0.75	0.44	down
chr15:38187752:38188197:-@chr15:38185851:38185931:-@chr15:38185288:38185584:-	BMF	0.24	0.19	0.19	0.08	0.05	0.07	0.206667	0.0666667	0.24	0.08	0.19	0.05	down
chr15:38890139:38890247:+@chr15:38892189:38892392:+@chr15:38892828:38892907:+	ZFYVE19	0.9	0.87	0.91	0.76	0.83	0.75	0.893333	0.78	0.91	0.83	0.87	0.75	down
chr15:40347437:40347522:-@chr15:40343580:40343689:-@chr15:40340686:40340739:-	TMEM87A	0.8	0.75	0.69	0.65	0.54	0.64	0.746667	0.61	0.8	0.65	0.69	0.54	down
chr15:42652173:42652310:-@chr15:42650015:42650148:-@chr15:42646828:42647082:-	SPG11	0.92	0.92	0.9	0.82	0.71	0.83	0.913333	0.786667	0.92	0.83	0.9	0.71	down
chr15:47371816:47372026:+@chr15:47397600:47397681:+@chr15:47398461:47398605:+@chr15:47399093:47399294:+	GALK2	0.61	0.62	0.58	0.5	0.54	0.45	0.603333	0.496667	0.62	0.54	0.58	0.45	down
chr15:56889721:56889879|56889777:+@chr15:56901208:56901314:+	FAM63B	0.86	0.85	0.83	0.77	0.74	0.72	0.846667	0.743333	0.86	0.77	0.83	0.72	down
chr15:58477434:58477534:-@chr15:58476746:58476829:-@chr15:58464350:58465577:-	ANXA2	0.5	0.66	0.51	0.36	0.49	0.49	0.556667	0.446667	0.66	0.49	0.5	0.36	down
chr15:63703346:63705362:+@chr15:63717520:63717573:+@chr15:63718987:63719095:+	SLC24A1	0.56	0.37	0.38	0.26	0.21	0.31	0.436667	0.26	0.56	0.31	0.37	0.21	down
chr15:72969401:72969483:+@chr15:72969832:72970048:+@chr15:72970773:72970973:+	MPI	0.79	0.82	0.88	0.76	0.66	0.61	0.83	0.676667	0.88	0.76	0.79	0.61	down
chr15:72969401:72969483:+@chr15:72969947:72970048:+@chr15:72970773:72970973:+	MPI	0.89	0.89	0.96	0.83	0.77	0.73	0.913333	0.776667	0.96	0.83	0.89	0.73	down
chr15:72969401:72969483:+@chr15:72969950:72970048:+@chr15:72970773:72970973:+	MPI	0.89	0.9	0.95	0.85	0.78	0.75	0.913333	0.793333	0.95	0.85	0.89	0.75	down
chr15:73704732:73705087:-@chr15:73704111:73704331:-@chr15:73701738:73701886:-@chr15:73700290:73700452:-	SNUPN	0.39	0.3	0.3	0.2	0.2	0.27	0.33	0.223333	0.39	0.27	0.3	0.2	down
chr15:80338484:80338551:-@chr15:80332087:80332171:-@chr15:80320666:80320799:-	EFL1	0.83	0.9	0.83	0.75	0.7	0.77	0.853333	0.74	0.9	0.77	0.83	0.7	down
chr15:89318370:89318480:-@chr15:89314634:89314748:-@chr15:89313681:89313857:-	PRC1	0.87	0.78	0.86	0.73	0.76	0.69	0.836667	0.726667	0.87	0.76	0.78	0.69	down
chr15:92575772:92575897:+@chr15:92622387:92622496:+@chr15:92642434:92642963:+	MCTP2	0.24	0.22	0.3	0.1	0.08	0.14	0.253333	0.106667	0.3	0.14	0.22	0.08	down
chr16:15057249:15057427:-@chr16:15049355:15049457:-@chr16:15049213:15049278:-	NTAN1	0.81	0.81	0.84	0.77	0.58	0.73	0.82	0.693333	0.84	0.77	0.81	0.58	down
chr16:1655059:1655140:+@chr16:1656075:1656179:+@chr16:1656424:1656602:+	CRAMP1	0.68	0.59	0.55	0.41	0.39	0.47	0.606667	0.423333	0.68	0.47	0.55	0.39	down
chr16:2066493:2066587:+@chr16:2067600:2067728:+@chr16:2069034:2069198:+	TSC2	0.4	0.4	0.34	0.19	0.21	0.26	0.38	0.22	0.4	0.26	0.34	0.19	down
chr16:21798160:21798279:-@chr16:21776481:21776578:-@chr16:21776402:21776480:-@chr16:21775865:21776238:-	NPIPB3,NPIPB4	0.21	0.24	0.35	0.2	0.13	0.12	0.266667	0.15	0.35	0.2	0.21	0.12	down
chr16:2196360:2196411:+@chr16:2196481:2196661:+	MLST8	0.56	0.4	0.5	0.29	0.17	0.31	0.486667	0.256667	0.56	0.31	0.4	0.17	down
chr16:2510349:2510543:+@chr16:2510771|2510986:2511125:+	AMDHD2	0.79	0.8	0.91	0.69	0.77	0.72	0.833333	0.726667	0.91	0.77	0.79	0.69	down
chr16:29971951:29972321:+@chr16:29973606:29973749:+@chr16:29973994:29974149:+	ALDOA	0.85	0.85	0.85	0.69	0.83	0.67	0.85	0.73	0.85	0.83	0.85	0.67	down
chr16:30027195:30027254:-@chr16:30027035:30027086:-@chr16:30023632:30023831:-	GDPD3	0.86	0.89	0.86	0.7	0.85	0.71	0.87	0.753333	0.89	0.85	0.86	0.7	down
chr16:30313934:30314400:+@chr16:30314602:30314695:+@chr16:30316152:30318930:+	ZNF48	0.85	0.9	0.85	0.78	0.81	0.6	0.866667	0.73	0.9	0.81	0.85	0.6	down
chr16:388209:388386:+@chr16:388991:389124:+	NME4	0.3	0.35	0.59	0.27	0.23	0.23	0.413333	0.243333	0.59	0.27	0.3	0.23	down
chr16:4243649:4243791:-@chr16:4241324:4242036:-@chr16:4238254:4238430:-@chr16:4235827:4237063:-	LINC01569	0.86	0.83	0.69	0.6	0.66	0.65	0.793333	0.636667	0.86	0.66	0.69	0.6	down
chr16:4465925:4466489:+@chr16:4473639:4473740:+@chr16:4478646:4478744:+@chr16:4495486:4495612:+	HMOX2	0.85	0.82	0.85	0.68	0.75	0.71	0.84	0.713333	0.85	0.75	0.82	0.68	down
chr16:55777234:55777477:-@chr16:55770219:55770265:-@chr16:55766033:55766101:-@chr16:55765141:55765282:-	FAM192A	0.35	0.49	0.38	0.25	0.26	0.11	0.406667	0.206667	0.49	0.26	0.35	0.11	down
chr16:55777238:55777451:-@chr16:55769915:55770265:-@chr16:55765582:55765699:-	FAM192A	0.49	0.39	0.42	0.33	0.31	0.33	0.433333	0.323333	0.49	0.33	0.39	0.31	down
chr16:56356992:56357053:-@chr16:56356872:56356886:-	KIFC3	0.66	0.46	0.65	0.42	0.44	0.45	0.59	0.436667	0.66	0.45	0.46	0.42	down
chr16:56601334:56601517:+@chr16:56605678:56605699:+@chr16:56608739:56608844:+	USB1	0.89	0.95	0.88	0.64	0.81	0.83	0.906667	0.76	0.95	0.83	0.88	0.64	down
chr16:65758524:65758626:+@chr16:65758879:65759003:+@chr16:65759228:65759351:+	HSF4	0.89	0.88	0.89	0.71	0.8	0.78	0.886667	0.763333	0.89	0.8	0.88	0.71	down
chr16:66823981:66824219:-@chr16:66823775:66823907:-@chr16:66823650:66823692:-	ESRP2,MIR6773	0.96	0.91	0.93	0.8	0.67	0.81	0.933333	0.76	0.96	0.81	0.91	0.67	down
chr16:70042119:70041998|70041994:-@chr16:70039001:70041286:-	ZNF23	0.45	0.48	0.55	0.27	0.39	0.15	0.493333	0.27	0.55	0.39	0.45	0.15	down
chr16:72943696:72943777:-@chr16:72943439:72943602:-	LOC283922	0.2	0.45	0.3	0.14	0.17	0.15	0.316667	0.153333	0.45	0.17	0.2	0.14	down
chr16:79772257:79772436:-@chr16:79770751:79770892:-@chr16:79768889:79769089:-	PKD1L2	0.94	0.88	0.82	0.62	0.67	0.8	0.88	0.696667	0.94	0.8	0.82	0.62	down
chr16:82774435:82774351|82774183:-@chr16:82772853:82773547:-	TAF1C	0.9	0.91	0.86	0.79	0.82	0.75	0.89	0.786667	0.91	0.82	0.86	0.75	down
chr16:83050227:83050295:+@chr16:83050377:83050493:+	ATP2C2	0.44	0.27	0.26	0.16	0.25	0.21	0.323333	0.206667	0.44	0.25	0.26	0.16	down
chr16:84372318:84372867:-@chr16:84371482:84371580:-@chr16:84369731:84370974:-	EMC8	0.66	0.73	0.67	0.63	0.58	0.54	0.686667	0.583333	0.73	0.63	0.66	0.54	down
chr16:88355858:88355931:-@chr16:88352486:88352610:-@chr16:88346047:88346131:-	FANCA	0.76	0.73	0.76	0.21	0.43	0.65	0.75	0.43	0.76	0.65	0.73	0.21	down
chr16:88355858:88355931:-@chr16:88352486:88352614:-@chr16:88346047:88346131:-	FANCA	0.88	0.85	0.76	0.45	0.59	0.69	0.83	0.576667	0.88	0.69	0.76	0.45	down
chr16:88492676:88492796|88492785:+@chr16:88494544:88494950:+	TCF25	0.92	0.87	0.85	0.79	0.68	0.8	0.88	0.756667	0.92	0.8	0.85	0.68	down
chr17:12861113:12861900:-@chr17:12860967|12860974:12860904:-	ELAC2	0.81	0.88	0.81	0.8	0.6	0.71	0.833333	0.703333	0.88	0.8	0.81	0.6	down
chr17:1497879:1498001:-@chr17:1496950:1497033:-@chr17:1496189:1496663:-	RILP	0.7	0.66	0.72	0.56	0.53	0.61	0.693333	0.566667	0.72	0.61	0.66	0.53	down
chr17:15843558:15843742:-@chr17:15837792:15837817:-@chr17:15831293:15831407:-	ZSWIM7	0.7	0.58	0.54	0.49	0.44	0.29	0.606667	0.406667	0.7	0.49	0.54	0.29	down
chr17:18885845:18885942:-@chr17:18879996:18880118:-@chr17:18864696:18866182:-	GRAP,GRAPL	0.44	0.52	0.43	0.3	0.3	0.33	0.463333	0.31	0.52	0.33	0.43	0.3	down
chr17:19081247:19081437:+@chr17:19117957:19118224:+@chr17:19123768:19123886:+@chr17:19125861:19125983:+	EPN2	0.84	0.72	0.86	0.62	0.68	0.65	0.806667	0.65	0.86	0.68	0.72	0.62	down
chr17:19155958:19156050:+@chr17:19157011|19157029:19157185:+	EPN2	0.73	0.68	0.78	0.59	0.62	0.44	0.73	0.55	0.78	0.62	0.68	0.44	down
chr17:24208604:24209630:+@chr17:24209720:24209777:+@chr17:24210108:24210257:+	ERAL1	0.93	0.95	0.91	0.83	0.73	0.76	0.93	0.773333	0.95	0.83	0.91	0.73	down
chr17:24969934:24970115:-@chr17:24968186|24969776:24968082:-	CORO6	0.71	0.8	0.76	0.68	0.67	0.6	0.756667	0.65	0.8	0.68	0.71	0.6	down
chr17:33366812:33367104|33366911:+@chr17:33367282:33367434:+		0.44	0.36	0.39	0.35	0.24	0.3	0.396667	0.296667	0.44	0.35	0.36	0.24	down
chr17:34220247:34220374:-@chr17:34220055:34220179:-@chr17:34219481:34219544:-		0.35	0.34	0.63	0.22	0.17	0.32	0.44	0.236667	0.63	0.32	0.34	0.17	down
chr17:3439850:3440148:-@chr17:3438231:3438410:-@chr17:3435778:3435969:-	TRPV1,SHPK	0.94	0.89	0.92	0.83	0.79	0.77	0.916667	0.796667	0.94	0.83	0.89	0.77	down
chr17:35067752:35067805:+@chr17:35068184:35068301:+	STARD3	0.16	0.2	0.42	0.1	0.08	0.13	0.26	0.103333	0.42	0.13	0.16	0.08	down
chr17:35067752:35067809:+@chr17:35068192:35068301:+	STARD3	0.8	0.78	0.7	0.63	0.58	0.69	0.76	0.633333	0.8	0.69	0.7	0.58	down
chr17:35155507:35155567:+@chr17:35155692:35155779:+@chr17:35155888:35155981:+	GRB7	0.72	0.7	0.84	0.63	0.57	0.32	0.753333	0.506667	0.84	0.63	0.7	0.32	down
chr17:37030744:37031065:-@chr17:37030653|37030657:37030437:-	KRT17,JUP	0.94	0.91	0.86	0.66	0.85	0.78	0.903333	0.763333	0.94	0.85	0.86	0.66	down
chr17:38978168:38978562:-@chr17:38977869:38977905:-@chr17:38969027:38969373:-	ETV4	0.57	0.58	0.56	0.55	0.37	0.29	0.57	0.403333	0.58	0.55	0.56	0.29	down
chr17:41785942:41786052:-@chr17:41744314:41744417:-@chr17:41732282:41732808:-	ARL17A,ARL17B,LOC100996709	0.31	0.26	0.4	0.17	0.18	0.25	0.323333	0.2	0.4	0.25	0.26	0.17	down
chr17:42361885:42361949:+@chr17:42363464|42363467:42363572:+	GOSR2,GOSR2	0.94	0.93	0.83	0.82	0.81	0.71	0.9	0.78	0.94	0.82	0.83	0.71	down
chr17:42488825:42489118:-@chr17:42486483:42486578:-@chr17:42465600:42465746:-		0.73	0.37	0.75	0.31	0.35	0.32	0.616667	0.326667	0.75	0.35	0.37	0.31	down
chr17:45110294:45110577:-@chr17:45108256:45108377:-@chr17:45100388:45100439:-	SPOP	0.76	0.79	0.76	0.55	0.59	0.42	0.77	0.52	0.79	0.59	0.76	0.42	down
chr17:45970439:45970557:+@chr17:45971244:45971324:+@chr17:45971547:45971675:+	EPN3	0.93	0.79	0.81	0.54	0.56	0.49	0.843333	0.53	0.93	0.56	0.79	0.49	down
chr17:46090795:46090856:+@chr17:46091542|46091597:46091728:+	ABCC3	0.32	0.35	0.51	0.07	0.14	0.18	0.393333	0.13	0.51	0.18	0.32	0.07	down
chr17:4826776:4826911:-@chr17:4826108:4826194:-@chr17:4825697:4825850:-	CAMTA2	0.69	0.65	0.72	0.5	0.57	0.63	0.686667	0.566667	0.72	0.63	0.65	0.5	down
chr17:5232846:5233004:-@chr17:5231964|5231996:5231823:-	NUP88	0.64	0.24	0.24	0.13	0.13	0.08	0.373333	0.113333	0.64	0.13	0.24	0.08	down
chr17:5325340:5325433:-@chr17:5325145:5325186:-	DERL2	0.8	0.7	0.71	0.67	0.42	0.63	0.736667	0.573333	0.8	0.67	0.7	0.42	down
chr17:55324840:55325085:-@chr17:55318226:55318373:-@chr17:55310246:55310477:-	TUBD1	0.42	0.25	0.42	0.2	0.2	0.18	0.363333	0.193333	0.42	0.2	0.25	0.18	down
chr17:59429799:59430166:+@chr17:59432176:59432400:+@chr17:59432559:59432629:+@chr17:59432825:59435396:+	PRR29	0.52	0.49	0.68	0.23	0.43	0.4	0.563333	0.353333	0.68	0.43	0.49	0.23	down
chr17:60401135:60402631:-@chr17:60399822:60399932:-@chr17:60399334:60399507:-	AMZ2P1	0.92	0.84	0.67	0.63	0.54	0.64	0.81	0.603333	0.92	0.64	0.67	0.54	down
chr17:6484681:6484971:-@chr17:6479445:6479678:-@chr17:6478785:6479215:-	KIAA0753	0.33	0.3	0.25	0.17	0.07	0.16	0.293333	0.133333	0.33	0.17	0.25	0.07	down
chr17:6602132:6602267:+@chr17:6603705:6603761:+@chr17:6604449:6604644:+	XAF1	0.84	0.81	0.85	0.69	0.76	0.68	0.833333	0.71	0.85	0.76	0.81	0.68	down
chr17:6860538:6860728:+@chr17:6860993:6861057:+@chr17:6861300:6861567:+	C17orf49,RNASEK-C17orf49	0.38	0.39	0.27	0.26	0.16	0.22	0.346667	0.213333	0.39	0.26	0.27	0.16	down
chr17:70372064:70371865|70371613:-@chr17:70370763:70370963:-	FDXR	0.87	0.95	0.87	0.81	0.79	0.78	0.896667	0.793333	0.95	0.81	0.87	0.78	down
chr17:70374501:70374722:-@chr17:70374261|70374285:70374163:-	FDXR	0.92	0.93	0.93	0.81	0.84	0.76	0.926667	0.803333	0.93	0.84	0.92	0.76	down
chr17:70754185:70754260:-@chr17:70752295:70752393:-@chr17:70751123:70751246:-	GGA3	0.67	0.84	0.8	0.62	0.63	0.64	0.77	0.63	0.84	0.64	0.67	0.62	down
chr17:71602090:71602257:-@chr17:71598005:71598073:-@chr17:71596851:71596996:-	EXOC7	0.49	0.5	0.51	0.39	0.39	0.39	0.5	0.39	0.51	0.39	0.49	0.39	down
chr17:7171208:7171273:-@chr17:7170876|7170953:7170754:-	NEURL4	0.8	0.79	0.89	0.66	0.64	0.77	0.826667	0.69	0.89	0.77	0.79	0.64	down
chr17:72093361:72093804:-@chr17:72086433:72086493:-@chr17:72082042:72082216:-	ST6GALNAC2	0.77	0.9	0.75	0.7	0.7	0.54	0.806667	0.646667	0.9	0.7	0.75	0.54	down
chr17:72134328:72134466:-@chr17:72133966:72134069:-@chr17:72132952:72133772:-	ST6GALNAC1	0.92	0.86	0.84	0.8	0.61	0.79	0.873333	0.733333	0.92	0.8	0.84	0.61	down
chr17:73722356:73722465:+@chr17:73724342:73724457:+@chr17:73730504:73730668:+	BIRC5	0.76	0.84	0.79	0.6	0.6	0.57	0.796667	0.59	0.84	0.6	0.76	0.57	down
chr17:7404765:7404913|7404858:+@chr17:7405040:7405649:+	TNFSF13,TNFSF12,TNFSF12-TNFSF13	0.35	0.4	0.43	0.22	0.34	0.29	0.393333	0.283333	0.43	0.34	0.35	0.22	down
chr17:7430734:7430880|7430819:+@chr17:7431203:7431313:+	MPDU1	0.85	0.81	0.84	0.65	0.47	0.75	0.833333	0.623333	0.85	0.75	0.81	0.47	down
chr17:75861635:75861798:+@chr17:75867158:75867304:+@chr17:75876209:75876757:+	RNF213	0.28	0.32	0.37	0.19	0.11	0.14	0.323333	0.146667	0.37	0.19	0.28	0.11	down
chr17:76696859:76696904:+@chr17:76699309:76699354:+@chr17:76704165:76704620:+	BAIAP2	0.52	0.47	0.61	0.24	0.23	0.36	0.533333	0.276667	0.61	0.36	0.47	0.23	down
chr17:77260448:77261168:-@chr17:77259584|77260110:77259469:-	ARL16	0.47	0.54	0.64	0.43	0.35	0.4	0.55	0.393333	0.64	0.43	0.47	0.35	down
chr17:77260448:77261168:-@chr17:77259926:77260110:-@chr17:77259469:77259584:-	ARL16	0.34	0.36	0.49	0.26	0.23	0.26	0.396667	0.25	0.49	0.26	0.34	0.23	down
chr17:77260971:77261169:-@chr17:77259584|77260561:77259469:-	ARL16	0.85	0.84	0.74	0.7	0.7	0.72	0.81	0.706667	0.85	0.72	0.74	0.7	down
chr17:77458722:77459025:-@chr17:77458372:77458425:-@chr17:77457884:77458066:-	PCYT2	0.63	0.9	0.64	0.43	0.22	0.3	0.723333	0.316667	0.9	0.43	0.63	0.22	down
chr17:77609946:77609983:-@chr17:77609506:77609573:-	DUS1L	0.55	0.65	0.65	0.52	0.43	0.42	0.616667	0.456667	0.65	0.52	0.55	0.42	down
chr17:77615291:77615399:-@chr17:77614629:77614683:-@chr17:77614026:77614138:-	DUS1L	0.65	0.73	0.87	0.48	0.48	0.59	0.75	0.516667	0.87	0.59	0.65	0.48	down
chr17:77734939:77735097:-@chr17:77730192:77730354:-@chr17:77729639:77729770:-	CCDC57	0.97	0.88	0.89	0.83	0.79	0.76	0.913333	0.793333	0.97	0.83	0.88	0.76	down
chr17:7792530:7792728|7792662:+@chr17:7793128:7793200:+	CNTROB	0.42	0.3	0.41	0.22	0.17	0.16	0.376667	0.183333	0.42	0.22	0.3	0.16	down
chr17:8074337:8074511:-@chr17:8073965|8074011:8073934:-	CTC1	0.82	0.84	0.86	0.77	0.77	0.67	0.84	0.736667	0.86	0.77	0.82	0.67	down
chr18:50058071:50058223|50058221:+@chr18:50061035:50061271:+	POLI	0.93	0.95	0.91	0.74	0.79	0.8	0.93	0.776667	0.95	0.8	0.91	0.74	down
chr18:57890886:57890938:-@chr18:57890534:57890578:-@chr18:57888603:57888719:-@chr18:57862041:57864192:-	PIGN	0.53	0.71	0.56	0.47	0.35	0.4	0.6	0.406667	0.71	0.47	0.53	0.35	down
chr18:70314423:70314646:+@chr18:70315724:70315941:+@chr18:70318152:70318248:+	CNDP2	0.66	0.84	0.57	0.35	0.44	0.55	0.69	0.446667	0.84	0.55	0.57	0.35	down
chr18:75838586:75838905:-@chr18:75837706:75837775:-@chr18:75831800:75834844:-	TXNL4A	0.15	0.17	0.16	0.04	0.04	0.06	0.16	0.0466667	0.17	0.06	0.15	0.04	down
chr19:10777592:10777643:+@chr19:10780245:10780256:+@chr19:10783940:10784053:+	DNM2	0.76	0.69	0.88	0.37	0.36	0.21	0.776667	0.313333	0.88	0.37	0.69	0.21	down
chr19:11169161:11169242:-@chr19:11167726:11167903:-@chr19:11167232:11167557:-	KANK2	0.32	0.23	0.31	0.17	0.18	0.17	0.286667	0.173333	0.32	0.18	0.23	0.17	down
chr19:12652139:12652010|12651964:-@chr19:12651615:12651736:-	DHPS	0.77	0.83	0.8	0.66	0.57	0.7	0.8	0.643333	0.83	0.7	0.77	0.57	down
chr19:16631206:16631258:-@chr19:16625848:16625936:-@chr19:16615954:16619072:-	SMIM7	0.9	0.81	0.75	0.68	0.7	0.65	0.82	0.676667	0.9	0.7	0.75	0.65	down
chr19:17833102:17833116:+@chr19:17833234:17833281:+	RPL18A	0.5	0.51	0.43	0.36	0.31	0.4	0.48	0.356667	0.51	0.4	0.43	0.31	down
chr19:18239336:18236734|18236173:-@chr19:18228906:18229916:-	KIAA1683	0.73	0.82	0.85	0.72	0.6	0.66	0.8	0.66	0.85	0.72	0.73	0.6	down
chr19:18876580:18876661:-@chr19:18875077:18875193:-@chr19:18872168:18872258:-	COPE	0.9	0.93	0.89	0.8	0.85	0.73	0.906667	0.793333	0.93	0.85	0.89	0.73	down
chr19:19600237:19600739:-@chr19:19599901:19599976:-@chr19:19598853:19599313:-	LPAR2	0.54	0.64	0.57	0.45	0.36	0.46	0.583333	0.423333	0.64	0.46	0.54	0.36	down
chr19:19733230:19733135|19733066:-@chr19:19728183:19730355:-		0.76	0.7	0.7	0.68	0.57	0.51	0.72	0.586667	0.76	0.68	0.7	0.51	down
chr19:21072831:21072957:+@chr19:21073458|21073461:21073556:+	ZNF714	0.39	0.38	0.65	0.28	0.32	0.26	0.473333	0.286667	0.65	0.32	0.38	0.26	down
chr19:21480207:21480416:+@chr19:21503726:21503921:+@chr19:21504300:21504831:+	ZNF429	0.23	0.17	0.27	0.09	0.15	0.1	0.223333	0.113333	0.27	0.15	0.17	0.09	down
chr19:40511821:40511973:+@chr19:40515290|40515337:40515667:+	CD22,MIR5196	0.79	0.8	0.8	0.68	0.68	0.39	0.796667	0.583333	0.8	0.68	0.79	0.39	down
chr19:40514670:40514817:+@chr19:40515290|40515337:40515667:+	CD22,MIR5196	0.84	0.78	0.82	0.65	0.74	0.67	0.813333	0.686667	0.84	0.74	0.78	0.65	down
chr19:40814073:40814147:+@chr19:40815819|40815843:40815994:+	RBM42	0.61	0.64	0.68	0.56	0.47	0.48	0.643333	0.503333	0.68	0.56	0.61	0.47	down
chr19:41708115:41707916|41707893:-@chr19:41693430:41698441:-	ZNF260	0.37	0.55	0.57	0.35	0.33	0.23	0.496667	0.303333	0.57	0.35	0.37	0.23	down
chr19:41839190:41839285:-@chr19:41826536:41826604:-@chr19:41819957:41822785:-	ZNF461	0.75	0.77	0.67	0.66	0.52	0.6	0.73	0.593333	0.77	0.66	0.67	0.52	down
chr19:42691007:42691145:+@chr19:42702926:42703054:+@chr19:42705274:42705389:+	ZNF793	0.73	0.64	0.83	0.6	0.61	0.54	0.733333	0.583333	0.83	0.61	0.64	0.54	down
chr19:42892437:42892563:-@chr19:42890750|42890753:42890655:-	ZNF607	0.35	0.38	0.47	0.33	0.2	0.2	0.4	0.243333	0.47	0.33	0.35	0.2	down
chr19:46580517:46580666:+@chr19:46581306:46581828:+	TMEM91	0.78	0.69	0.7	0.54	0.58	0.59	0.723333	0.57	0.78	0.59	0.69	0.54	down
chr19:49977467:49977588:+@chr19:49979361:49979498:+@chr19:49985101:49985188:+	CBLC	0.81	0.9	0.84	0.72	0.8	0.69	0.85	0.736667	0.9	0.8	0.81	0.69	down
chr19:50086317:50086411:+@chr19:50086504|50086507:50086786:+	TOMM40	0.88	0.87	0.89	0.56	0.8	0.68	0.88	0.68	0.89	0.8	0.87	0.56	down
chr19:50689264:50689518:-@chr19:50688258:50688476:-@chr19:50684440:50684651:-	RTN2	0.69	0.76	0.74	0.61	0.52	0.68	0.73	0.603333	0.76	0.68	0.69	0.52	down
chr19:53823044:53823138|53823088:+@chr19:53823231:53825446:+	SPHK2	0.91	0.93	0.9	0.66	0.85	0.88	0.913333	0.796667	0.93	0.88	0.9	0.66	down
chr19:54552321:54552383:-@chr19:54551028:54551039:-@chr19:54550372:54550488:-	TEAD2	0.2	0.32	0.3	0.12	0.19	0.14	0.273333	0.15	0.32	0.19	0.2	0.12	down
chr19:54886182:54886409:+@chr19:54886890:54886958:+@chr19:54887308:54887462:+	CPT1C	0.53	0.57	0.51	0.3	0.48	0.38	0.536667	0.386667	0.57	0.48	0.51	0.3	down
chr19:55077311:55077476|55077457:+@chr19:55077833:55077976:+	TBC1D17,MIR4750	0.65	0.71	0.57	0.4	0.43	0.29	0.643333	0.373333	0.71	0.43	0.57	0.29	down
chr19:55573218:55573512|55573506:+@chr19:55573591:55573865:+	NR1H2	0.83	0.72	0.69	0.51	0.61	0.6	0.746667	0.573333	0.83	0.61	0.69	0.51	down
chr19:5563551:5563578:-@chr19:5562131:5562641:-@chr19:5561650:5561699:-	SAFB2	0.54	0.58	0.6	0.27	0.45	0.47	0.573333	0.396667	0.6	0.47	0.54	0.27	down
chr19:56196166:56196243:-@chr19:56195492:56195786:-@chr19:56195064:56195326:-	KLK8,KLK9	0.61	0.62	0.72	0.4	0.42	0.41	0.65	0.41	0.72	0.42	0.61	0.4	down
chr19:5631610:5632282:+@chr19:5635792:5635916:+@chr19:5635976:5636130:+@chr19:5637427:5637538:+	HSD11B1L,RPL36	0.69	0.52	0.53	0.41	0.46	0.5	0.58	0.456667	0.69	0.5	0.52	0.41	down
chr19:5802401:5802485:-@chr19:5797575|5797629:5797437:-	FUT3	0.89	0.88	0.9	0.77	0.72	0.73	0.89	0.74	0.9	0.77	0.88	0.72	down
chr19:5802401:5802485:-@chr19:5797575|5797977:5797437:-	FUT3	0.53	0.54	0.72	0.21	0.2	0.48	0.596667	0.296667	0.72	0.48	0.53	0.2	down
chr19:5802401:5802485:-@chr19:5797610|5797977:5797437:-	FUT3	0.62	0.48	0.63	0.39	0.47	0.42	0.576667	0.426667	0.63	0.47	0.48	0.39	down
chr19:58286702:58286785:-@chr19:58286478:58286562:-@chr19:58280034:58281386:-	ZNF160	0.57	0.6	0.6	0.44	0.33	0.32	0.59	0.363333	0.6	0.44	0.57	0.32	down
chr19:63573107:63572998|63572896:-@chr19:63570797:63572540:-	ZNF837	0.76	0.68	0.77	0.6	0.53	0.6	0.736667	0.576667	0.77	0.6	0.68	0.53	down
chr19:63611860:63612344:+@chr19:63613120|63613144:63613270:+	ZNF584	0.37	0.45	0.47	0.14	0.26	0.22	0.43	0.206667	0.47	0.26	0.37	0.14	down
chr1:113299421:113300389:-@chr1:113274026:113274179:-@chr1:113273163:113273497:-	SLC16A1	0.48	0.39	0.47	0.38	0.33	0.3	0.446667	0.336667	0.48	0.38	0.39	0.3	down
chr1:11786049:11787176:-@chr1:11785672:11785773:-	MTHFR	0.74	0.73	0.78	0.67	0.65	0.58	0.75	0.633333	0.78	0.67	0.73	0.58	down
chr1:1246239:1246336:-@chr1:1245699:1245925:-	CPSF3L,MIR6727	0.91	0.86	0.88	0.79	0.76	0.76	0.883333	0.77	0.91	0.79	0.86	0.76	down
chr1:1402135:1402593:+@chr1:1402994:1403091:+@chr1:1403887:1403988:+	ATAD3B	0.83	0.88	0.83	0.71	0.69	0.74	0.846667	0.713333	0.88	0.74	0.83	0.69	down
chr1:143603858:143603946:-@chr1:143601949:143603576:-	PDE4DIP	0.85	0.8	0.87	0.62	0.68	0.67	0.84	0.656667	0.87	0.68	0.8	0.62	down
chr1:144410310:144410447:-@chr1:144407290:144407957:-	CD160	0.62	0.69	0.81	0.47	0.4	0.61	0.706667	0.493333	0.81	0.61	0.62	0.4	down
chr1:145099915:145099983:-@chr1:145099000:145099036:-@chr1:145093302:145097845:-	PRKAB2	0.29	0.32	0.23	0.16	0.17	0.17	0.28	0.166667	0.32	0.17	0.23	0.16	down
chr1:146488201:146488252:-@chr1:146484126:146484289:-@chr1:146483033:146483084:-		0.54	0.53	0.6	0.46	0.43	0.45	0.556667	0.446667	0.6	0.46	0.53	0.43	down
chr1:148730494:148730762|148730611:+@chr1:148731511:148731589:+	TARS2,MIR6878	0.74	0.62	0.74	0.42	0.6	0.4	0.7	0.473333	0.74	0.6	0.62	0.4	down
chr1:149295886:149295756|149295751:-@chr1:149294116:149295093:-	CDC42SE1	0.69	0.63	0.65	0.48	0.5	0.41	0.656667	0.463333	0.69	0.5	0.63	0.41	down
chr1:149608869:149608813|149608542:-@chr1:149607299:149607419:-	SELENBP1	0.49	0.44	0.47	0.29	0.27	0.2	0.466667	0.253333	0.49	0.29	0.44	0.2	down
chr1:149779316:149779526:+@chr1:149801191:149801265:+@chr1:149801685:149801786:+	MIR554,,,TUFT1	0.58	0.65	0.55	0.28	0.13	0.24	0.593333	0.216667	0.65	0.28	0.55	0.13	down
chr1:150001205:150001255:-@chr1:150000547:150000652:-@chr1:149999916:149999999:-	MRPL9	0.81	0.73	0.68	0.62	0.28	0.42	0.74	0.44	0.81	0.62	0.68	0.28	down
chr1:150001205:150001255:-@chr1:150000551:150000652:-@chr1:149999916:149999999:-	MRPL9	0.94	0.94	0.9	0.85	0.72	0.74	0.926667	0.77	0.94	0.85	0.9	0.72	down
chr1:153171452:153171515:-@chr1:153168157|153168273:153168124:-	PMVK	0.62	0.57	0.73	0.48	0.55	0.42	0.64	0.483333	0.73	0.55	0.57	0.42	down
chr1:153212608:153212457|153212393:-@chr1:153209132:153209299:-	SHC1	0.69	0.5	0.56	0.16	0.45	0.4	0.583333	0.336667	0.69	0.45	0.5	0.16	down
chr1:153299305:153299443:+@chr1:153300518:153300589:+@chr1:153301345:153301469:+	ADAM15	0.33	0.23	0.44	0.05	0.06	0.03	0.333333	0.0466667	0.44	0.06	0.23	0.03	down
chr1:153299863:153299932:+@chr1:153301004:153301075:+@chr1:153301345:153301469:+	ADAM15	0.16	0.17	0.18	0.07	0.04	0.05	0.17	0.0533333	0.18	0.07	0.16	0.04	down
chr1:153300515:153300589:+@chr1:153300676:153300746:+@chr1:153301004:153301075:+@chr1:153301345:153301469:+	ADAM15	0.78	0.81	0.8	0.7	0.5	0.66	0.796667	0.62	0.81	0.7	0.78	0.5	down
chr1:153438676:153438816:-@chr1:153438449|153438529:153438372:-	THBS3	0.22	0.23	0.25	0.13	0.05	0.06	0.233333	0.08	0.25	0.13	0.22	0.05	down
chr1:153925345:153925935:-@chr1:153916831:153916871:-@chr1:153915824:153915927:-	YY1AP1	0.92	0.93	0.88	0.75	0.58	0.79	0.91	0.706667	0.93	0.79	0.88	0.58	down
chr1:154726928:154727015:-@chr1:154719834|154719846:154719655:-	MEF2D	0.91	0.81	0.75	0.38	0.62	0.68	0.823333	0.56	0.91	0.68	0.75	0.38	down
chr1:160826737:160826925:+@chr1:160829146:160829196:+@chr1:160834206:160834272:+	UAP1	0.92	0.82	0.95	0.7	0.77	0.81	0.896667	0.76	0.95	0.81	0.82	0.7	down
chr1:160826737:160826925:+@chr1:160829149:160829196:+@chr1:160834206:160834272:+	UAP1	0.7	0.6	0.6	0.3	0.45	0.56	0.633333	0.436667	0.7	0.56	0.6	0.3	down
chr1:169824140:169824267:+@chr1:169826914:169826962:+@chr1:169827349:169829273:+	PRRC2C	0.32	0.34	0.31	0.24	0.2	0.22	0.323333	0.22	0.34	0.24	0.31	0.2	down
chr1:170811281:170811386:+@chr1:170813302:170813322:+@chr1:170813527:170813582:+	SUCO	0.83	0.66	0.65	0.64	0.5	0.56	0.713333	0.566667	0.83	0.64	0.65	0.5	down
chr1:172100990:172101308:-@chr1:172100245:172100267:-@chr1:172099662:172100065:-	GAS5	0.23	0.16	0.2	0.11	0.06	0.12	0.196667	0.0966667	0.23	0.12	0.16	0.06	down
chr1:172182237:172182369:-@chr1:172179349|172179376:172179203:-	RC3H1	0.68	0.72	0.82	0.31	0.52	0.65	0.74	0.493333	0.82	0.65	0.68	0.31	down
chr1:176690205:176690406:+@chr1:176692458|176692479:176692657:+	RASAL2	0.55	0.65	0.58	0.38	0.45	0.5	0.593333	0.443333	0.65	0.5	0.55	0.38	down
chr1:177125400:177125454:+@chr1:177127988:177128065:+@chr1:177129677:177130083:+	RALGPS2	0.96	0.97	0.94	0.69	0.74	0.86	0.956667	0.763333	0.97	0.86	0.94	0.69	down
chr1:178432020:178432357:+@chr1:178433091:178433792:+	QSOX1	0.73	0.73	0.74	0.6	0.63	0.6	0.733333	0.61	0.74	0.63	0.73	0.6	down
chr1:178432020:178432361:+@chr1:178433091:178433792:+	QSOX1	0.91	0.93	0.93	0.81	0.85	0.8	0.923333	0.82	0.93	0.85	0.91	0.8	down
chr1:178432020:178432648|178432357:+@chr1:178433091:178433799:+	QSOX1	0.68	0.69	0.7	0.56	0.61	0.57	0.69	0.58	0.7	0.61	0.68	0.56	down
chr1:180821085:180822731:-@chr1:180819839:180819924:-@chr1:180817755:180818016:-	RNASEL	0.93	0.93	0.92	0.74	0.9	0.83	0.926667	0.823333	0.93	0.9	0.92	0.74	down
chr1:19796054:19796190:+@chr1:19799868:19800052:+@chr1:19816339:19816417:+@chr1:19821181:19821228:+	MINOS1	0.48	0.31	0.28	0.19	0.14	0.24	0.356667	0.19	0.48	0.24	0.28	0.14	down
chr1:222584396:222584525:-@chr1:222580716:222580789:-@chr1:222572203:222572255:-	NVL	0.83	0.91	0.87	0.62	0.77	0.78	0.87	0.723333	0.91	0.78	0.83	0.62	down
chr1:223762276:223762342:-@chr1:223759316:223759378:-@chr1:223755317:223755395:-	ENAH	0.8	0.9	0.89	0.5	0.54	0.55	0.863333	0.53	0.9	0.55	0.8	0.5	down
chr1:2329751:2330157:-@chr1:2328251|2328254:2328019:-	PEX10	0.39	0.32	0.4	0.15	0.14	0.29	0.37	0.193333	0.4	0.29	0.32	0.14	down
chr1:240080334:240080511:+@chr1:240082217:240082336:+@chr1:240083283:240083406:+	EXO1	0.88	0.88	0.9	0.77	0.76	0.71	0.886667	0.746667	0.9	0.77	0.88	0.71	down
chr1:24015752:24015847:-@chr1:24009813:24009876:-@chr1:24007212:24007400:-	HMGCL	0.75	0.78	0.69	0.64	0.57	0.57	0.74	0.593333	0.78	0.64	0.69	0.57	down
chr1:242281184:242281369:+@chr1:242283096:242283125:+@chr1:242283713:242287403:+	ZBTB18	0.63	0.5	0.71	0.32	0.39	0.39	0.613333	0.366667	0.71	0.39	0.5	0.32	down
chr1:26021608:26022206:+@chr1:26022316|26022424:26022517:+	MTFR1L	0.82	0.83	0.86	0.64	0.71	0.71	0.836667	0.686667	0.86	0.71	0.82	0.64	down
chr1:26021608:26022206:+@chr1:26022318|26022424:26022517:+	MTFR1L	0.77	0.74	0.79	0.52	0.52	0.7	0.766667	0.58	0.79	0.7	0.74	0.52	down
chr1:27757804:27757981:-@chr1:27757403:27757628:-@chr1:27752172:27752283:-	AHDC1	0.83	0.8	0.82	0.72	0.72	0.7	0.816667	0.713333	0.83	0.72	0.8	0.7	down
chr1:28606508:28606561:+@chr1:28656930:28656953:+@chr1:28658183:28658356:+	PHACTR4	0.81	0.6	0.36	0.27	0.24	0.23	0.59	0.246667	0.81	0.27	0.36	0.23	down
chr1:28606508:28606561:+@chr1:28656930:28656957:+@chr1:28658183:28658356:+	PHACTR4	0.47	0.43	0.36	0.17	0.13	0.27	0.42	0.19	0.47	0.27	0.36	0.13	down
chr1:29264056:29264257:+@chr1:29295254:29295703:+@chr1:29296906:29297034:+	EPB41	0.7	0.73	0.66	0.19	0.22	0.15	0.696667	0.186667	0.73	0.22	0.66	0.15	down
chr1:31226746:31226839:-@chr1:31225597|31225600:31225496:-	PUM1	0.46	0.45	0.55	0.38	0.38	0.26	0.486667	0.34	0.55	0.38	0.45	0.26	down
chr1:32833242:32833411:+@chr1:32838275|32838456:32838814:+	ZBTB8A	0.67	0.74	0.74	0.55	0.61	0.61	0.716667	0.59	0.74	0.61	0.67	0.55	down
chr1:39272651:39272843|39272815:+@chr1:39279313:39279409:+	NDUFS5	0.96	0.98	0.94	0.73	0.92	0.85	0.96	0.833333	0.98	0.92	0.94	0.73	down
chr1:39718057:39718268:+@chr1:39719179:39719289:+@chr1:39722860:39725246:+	MACF1,KIAA0754	0.8	0.76	0.77	0.59	0.63	0.68	0.776667	0.633333	0.8	0.68	0.76	0.59	down
chr1:41424380:41424509:-@chr1:41401038:41401238:-@chr1:41399623:41399691:-	SCMH1	0.31	0.27	0.33	0.24	0.1	0.16	0.303333	0.166667	0.33	0.24	0.27	0.1	down
chr1:43836332:43837171:+@chr1:43840329:43840355:+@chr1:43841674:43841791:+	PTPRF	0.35	0.33	0.37	0.1	0.08	0.09	0.35	0.09	0.37	0.1	0.33	0.08	down
chr1:51988405:51988455:+@chr1:51994580:51994618:+@chr1:51998950:51999121:+	OSBPL9	0.82	0.74	0.82	0.73	0.71	0.56	0.793333	0.666667	0.82	0.73	0.74	0.56	down
chr1:53457127:53458604:-@chr1:53456750|53456755:53456674:-	C1orf123	0.77	0.82	0.84	0.74	0.65	0.72	0.81	0.703333	0.84	0.74	0.77	0.65	down
chr1:54127974:54128099:-@chr1:54127505:54127724:-@chr1:54127168:54127247:-	YIPF1	0.73	0.57	0.56	0.51	0.43	0.47	0.62	0.47	0.73	0.51	0.56	0.43	down
chr1:5974891:5975173:-@chr1:5968879|5968974:5968806:-	NPHP4	0.88	0.88	0.88	0.76	0.61	0.74	0.88	0.703333	0.88	0.76	0.88	0.61	down
chr1:63022376:63022532:+@chr1:63041978|63042037:63042121:+	ATG4C	0.89	0.86	0.88	0.63	0.61	0.8	0.876667	0.68	0.89	0.8	0.86	0.61	down
chr1:68722221:68722361:-@chr1:68720317:68721168:-@chr1:68719711:68719883:-	DEPDC1	0.8	0.74	0.7	0.64	0.62	0.64	0.746667	0.633333	0.8	0.64	0.7	0.62	down
chr1:68722221:68722361:-@chr1:68720912:68721168:-@chr1:68719711:68719883:-	DEPDC1	0.59	0.49	0.49	0.36	0.4	0.41	0.523333	0.39	0.59	0.41	0.49	0.36	down
chr1:754246:754347:+@chr1:772897:773049:+@chr1:777170:777953:+	LINC01128	0.84	0.95	0.86	0.73	0.81	0.76	0.883333	0.766667	0.95	0.81	0.84	0.73	down
chr1:84237202:84237426:-@chr1:84171879:84172037:-@chr1:84167407:84167501:-	TTLL7	0.83	0.71	0.75	0.65	0.65	0.6	0.763333	0.633333	0.83	0.65	0.71	0.6	down
chr1:95058486:95058622:+@chr1:95059093:95059200:+@chr1:95062637:95062779:+	SLC44A3	0.9	0.86	0.89	0.65	0.84	0.75	0.883333	0.746667	0.9	0.84	0.86	0.65	down
chr20:13552093:13552161:-@chr20:13545504:13545770:-@chr20:13529190:13529264:-@chr20:13515568:13516017:-	TASP1	0.56	0.71	0.66	0.54	0.47	0.3	0.643333	0.436667	0.71	0.54	0.56	0.3	down
chr20:14266050:14266309:-@chr20:14257780:14257973:-@chr20:14251634:14256204:-	FLRT3	0.73	0.46	0.6	0.38	0.43	0.43	0.596667	0.413333	0.73	0.43	0.46	0.38	down
chr20:18217121:18217248:+@chr20:18234963:18235037:+@chr20:18243716:18245640:+	ZNF133	0.21	0.36	0.3	0.19	0.2	0.13	0.29	0.173333	0.36	0.2	0.21	0.13	down
chr20:30853852:30853937:+@chr20:30856805:30856874:+@chr20:30857676:30857794:+	DNMT3B	0.85	0.81	0.77	0.64	0.45	0.72	0.81	0.603333	0.85	0.72	0.77	0.45	down
chr20:30853852:30853937:+@chr20:30857676:30857794:+@chr20:30859229:30860826:+	DNMT3B	0.9	0.75	0.55	0.34	0.38	0.4	0.733333	0.373333	0.9	0.4	0.55	0.34	down
chr20:32082989:32083071:+@chr20:32084631:32084706:+@chr20:32116511:32116627:+@chr20:32123533:32123797:+	RALY,MIR4755	0.35	0.45	0.44	0.27	0.34	0.29	0.413333	0.3	0.45	0.34	0.35	0.27	down
chr20:33658751:33658898:-@chr20:33658492|33658502:33658437:-	FER1L4	0.66	0.56	0.54	0.2	0.45	0.38	0.586667	0.343333	0.66	0.45	0.54	0.2	down
chr20:33683647:33683721:-@chr20:33683499:33683584:-@chr20:33683281:33683361:-	CPNE1,NFS1	0.68	0.66	0.8	0.39	0.51	0.48	0.713333	0.46	0.8	0.51	0.66	0.39	down
chr20:3729109:3729145:+@chr20:3729390:3729512:+@chr20:3729618:3729740:+	CDC25B	0.83	0.87	0.89	0.62	0.82	0.73	0.863333	0.723333	0.89	0.82	0.83	0.62	down
chr20:42998692:42998785:+@chr20:43000157:43000246:+@chr20:43020392:43021211:+	PABPC1L	0.58	0.52	0.56	0.31	0.49	0.26	0.553333	0.353333	0.58	0.49	0.52	0.26	down
chr20:42999607:43000246:+@chr20:43014698:43014759:+@chr20:43020392:43021211:+	PABPC1L	0.27	0.28	0.24	0.11	0.15	0.23	0.263333	0.163333	0.28	0.23	0.24	0.11	down
chr20:43874662:43875510:+@chr20:43876430:43876516:+@chr20:43877436:43877586:+	UBE2C	0.63	0.56	0.75	0.54	0.44	0.48	0.646667	0.486667	0.75	0.54	0.56	0.44	down
chr20:44432489:44432571:-@chr20:44430937:44431014:-	ELMO2	0.31	0.08	0.18	0.07	0.02	0.06	0.19	0.05	0.31	0.07	0.08	0.02	down
chr20:47327965:47328369:-@chr20:47325823|47325831:47325723:-	ZNFX1	0.89	0.94	0.91	0.71	0.78	0.82	0.913333	0.77	0.94	0.82	0.89	0.71	down
chr20:52025335:52025376:-@chr20:52007378:52007443:-@chr20:52003378:52003641:-	BCAS1	0.82	0.83	0.8	0.43	0.58	0.33	0.816667	0.446667	0.83	0.58	0.8	0.33	down
chr20:54521778:54521891:+@chr20:54525398|54525569:54525664:+	FAM209A,RTFDC1	0.8	0.8	0.78	0.61	0.74	0.58	0.793333	0.643333	0.8	0.74	0.78	0.58	down
chr20:56523840:56524202:+@chr20:56527966:56528061:+@chr20:56531631:56531743:+	APCDD1L-AS1	0.75	0.55	0.67	0.36	0.35	0.24	0.656667	0.316667	0.75	0.36	0.55	0.24	down
chr20:56523840:56524202:+@chr20:56527966:56528087:+@chr20:56531631:56531743:+	APCDD1L-AS1	0.65	0.46	0.55	0.36	0.3	0.19	0.553333	0.283333	0.65	0.36	0.46	0.19	down
chr20:61638882:61639306:-@chr20:61636772:61636856:-@chr20:61635623:61636112:-	PTK6	0.55	0.56	0.61	0.43	0.52	0.47	0.573333	0.473333	0.61	0.52	0.55	0.43	down
chr20:61835383:61835508:+@chr20:61836501:61836620:+	ZGPAT	0.46	0.56	0.66	0.45	0.45	0.3	0.56	0.4	0.66	0.45	0.46	0.3	down
chr20:61835383:61835535:+@chr20:61836441:61836620:+	ZGPAT	0.49	0.44	0.49	0.38	0.3	0.38	0.473333	0.353333	0.49	0.38	0.44	0.3	down
chr20:61835383:61835571:+@chr20:61836441:61836620:+	ZGPAT	0.57	0.66	0.6	0.52	0.44	0.56	0.61	0.506667	0.66	0.56	0.57	0.44	down
chr21:31995179:31995355:-@chr21:31990920|31990931:31990753:-	SCAF4	0.8	0.79	0.78	0.57	0.32	0.75	0.79	0.546667	0.8	0.75	0.78	0.32	down
chr21:35343009:35343511:-@chr21:35187092:35187130:-@chr21:35181010:35181263:-	RUNX1,LOC100506403	0.75	0.82	0.65	0.59	0.58	0.56	0.74	0.576667	0.82	0.59	0.65	0.56	down
chr21:37366604:37367285:-@chr21:37366315:37366480:-@chr21:37363480:37363794:-	PIGP	0.55	0.5	0.55	0.26	0.41	0.36	0.533333	0.343333	0.55	0.41	0.5	0.26	down
chr21:37385463:37385583:+@chr21:37388175:37388260:+@chr21:37389520:37389614:+	TTC3	0.79	0.85	0.88	0.77	0.75	0.68	0.84	0.733333	0.88	0.77	0.79	0.68	down
chr21:39642088:39642373:-@chr21:39641712:39641748:-@chr21:39641043:39641279:-	HMGN1	0.33	0.45	0.43	0.27	0.26	0.28	0.403333	0.27	0.45	0.28	0.33	0.26	down
chr21:44576154:44576325:-@chr21:44574774:44575227:-	C21orf2	0.62	0.54	0.61	0.47	0.52	0.34	0.59	0.443333	0.62	0.52	0.54	0.34	down
chr21:46435577:46435418|46435408:-@chr21:46432788:46433163:-	LSS	0.58	0.62	0.78	0.5	0.56	0.47	0.66	0.51	0.78	0.56	0.58	0.47	down
chr21:46742923:46743174:+@chr21:46748702:46748830:+@chr21:46753598:46753717:+	DIP2A	0.8	0.8	0.88	0.72	0.74	0.71	0.826667	0.723333	0.88	0.74	0.8	0.71	down
chr22:15959665:15959777:+@chr22:15961245:15961371:+@chr22:15962886:15962933:+	IL17RA	0.78	0.71	0.67	0.65	0.6	0.57	0.72	0.606667	0.78	0.65	0.67	0.57	down
chr22:18767159:18767279:-@chr22:18766517:18766675:-		0.93	0.95	0.89	0.84	0.79	0.8	0.923333	0.81	0.95	0.84	0.89	0.79	down
chr22:19235295:19235774:+@chr22:19237432:19237461:+@chr22:19248737:19249210:+	MED15	0.75	0.7	0.69	0.68	0.59	0.5	0.713333	0.59	0.75	0.68	0.69	0.5	down
chr22:19678393:19678558:+@chr22:19678847|19678963:19679016:+	LZTR1	0.87	0.85	0.78	0.69	0.73	0.65	0.833333	0.69	0.87	0.73	0.78	0.65	down
chr22:20656984:20657090:-@chr22:20656249:20656323:-@chr22:20652991:20653147:-	TOP3B	0.89	0.87	0.84	0.82	0.75	0.68	0.866667	0.75	0.89	0.82	0.84	0.68	down
chr22:23315789:23315917:-@chr22:23314297|23315361:23314182:-	LRRC75B	0.21	0.25	0.32	0.11	0.14	0.12	0.26	0.123333	0.32	0.14	0.21	0.11	down
chr22:26661139:26661218:+@chr22:26666008:26666159:+@chr22:26720461:26720641:+@chr22:26723399:26724826:+	TTC28-AS1	0.64	0.6	0.62	0.56	0.41	0.41	0.62	0.46	0.64	0.56	0.6	0.41	down
chr22:28407428:28407590:+@chr22:28409009:28409053:+@chr22:28420741:28424593:+	NF2	0.89	0.94	0.9	0.75	0.68	0.77	0.91	0.733333	0.94	0.77	0.89	0.68	down
chr22:28407428:28407590:+@chr22:28409009:28409068:+@chr22:28420741:28424593:+	NF2	0.54	0.66	0.5	0.36	0.3	0.39	0.566667	0.35	0.66	0.39	0.5	0.3	down
chr22:28564167:28564291:-@chr22:28558234:28558331:-@chr22:28548324:28548453:-@chr22:28541995:28542062:-	ASCC2	0.61	0.67	0.77	0.6	0.58	0.57	0.683333	0.583333	0.77	0.6	0.61	0.57	down
chr22:30061678:30061849:-@chr22:30054773:30054845:-@chr22:30051790:30053295:-	PATZ1	0.43	0.47	0.53	0.34	0.32	0.4	0.476667	0.353333	0.53	0.4	0.43	0.32	down
chr22:37024737:37025155:-@chr22:37021339:37021399:-@chr22:37017891:37020486:-	CSNK1E,LOC400927-CSNK1E	0.48	0.5	0.56	0.31	0.23	0.3	0.513333	0.28	0.56	0.31	0.48	0.23	down
chr22:40011936:40012200:-@chr22:40010851:40011103:-@chr22:40008737:40008773:-@chr22:40006883:40007032:-	RANGAP1	0.39	0.34	0.34	0.26	0.28	0.21	0.356667	0.25	0.39	0.28	0.34	0.21	down
chr22:40027983:40028165:-@chr22:40010851:40011103:-@chr22:40006883:40007032:-	RANGAP1	0.85	0.87	0.8	0.67	0.68	0.56	0.84	0.636667	0.87	0.68	0.8	0.56	down
chr22:40310477:40311352:-@chr22:40310008|40310322:40309909:-	PMM1	0.9	0.89	0.93	0.86	0.79	0.62	0.906667	0.756667	0.93	0.86	0.89	0.62	down
chr22:40346702:40347017:-@chr22:40333212:40333281:-@chr22:40329994:40330103:-	DESI1	0.61	0.6	0.7	0.54	0.59	0.39	0.636667	0.506667	0.7	0.59	0.6	0.39	down
chr22:40414277:40414029|40413672:-@chr22:40406194:40406314:-	SNU13	0.51	0.4	0.5	0.34	0.33	0.35	0.47	0.34	0.51	0.35	0.4	0.33	down
chr22:45024817:45025240:-@chr22:45022733:45022845:-@chr22:45021667:45021782:-	CDPF1	0.84	0.75	0.75	0.54	0.68	0.6	0.78	0.606667	0.84	0.68	0.75	0.54	down
chr22:49031327:49031941:-@chr22:49031055|49031079:49030983:-	HDAC10,MAPK12	0.89	0.8	0.87	0.76	0.75	0.7	0.853333	0.736667	0.89	0.76	0.8	0.7	down
chr22:49037638:49037749:-@chr22:49037202|49037520:49037155:-	MAPK12	0.66	0.65	0.56	0.44	0.54	0.51	0.623333	0.496667	0.66	0.54	0.56	0.44	down
chr22:49095606:49095701:-@chr22:49095401:49095443:-@chr22:49094815:49095273:-	DENND6B	0.7	0.7	0.75	0.56	0.55	0.57	0.716667	0.56	0.75	0.57	0.7	0.55	down
chr22:49315199:49315291:-@chr22:49314791:49315049:-	TYMP,ODF3B	0.7	0.64	0.66	0.52	0.54	0.5	0.666667	0.52	0.7	0.54	0.64	0.5	down
chr22:49315199:49315855:-@chr22:49314791:49315026:-@chr22:49312728:49313012:-	TYMP,ODF3B	0.88	0.89	0.93	0.76	0.78	0.84	0.9	0.793333	0.93	0.84	0.88	0.76	down
chr22:49315199:49315855:-@chr22:49314791:49315042:-@chr22:49312728:49313012:-	TYMP,ODF3B	0.85	0.88	0.91	0.75	0.73	0.83	0.88	0.77	0.91	0.83	0.85	0.73	down
chr22:49315199:49315855:-@chr22:49314791:49315049:-@chr22:49312728:49313012:-	TYMP,ODF3B	0.86	0.87	0.91	0.74	0.74	0.84	0.88	0.773333	0.91	0.84	0.86	0.74	down
chr22:49554843:49554749|49554719:-@chr22:49554335:49554418:-	RABL2B	0.26	0.13	0.28	0.11	0.09	0.05	0.223333	0.0833333	0.28	0.11	0.13	0.05	down
chr2:10016366:10019016:+@chr2:10020035:10020111:+@chr2:10021466:10021622:+	GRHL1	0.81	0.8	0.85	0.62	0.54	0.55	0.82	0.57	0.85	0.62	0.8	0.54	down
chr2:109660408:109660326|109660251:-@chr2:109657573:109659190:-	SEPT10	0.23	0.33	0.33	0.17	0.12	0.1	0.296667	0.13	0.33	0.17	0.23	0.1	down
chr2:111818109:111818285:-@chr2:111722196:111722289:-@chr2:111713850:111714044:-	MIR4435-2,MIR4435-2HG	0.81	0.88	0.82	0.62	0.59	0.69	0.836667	0.633333	0.88	0.69	0.81	0.59	down
chr2:11218202:11218325:+@chr2:11229502:11229622:+@chr2:11235314:11236452:+	PQLC3	0.22	0.12	0.22	0.11	0.05	0.09	0.186667	0.0833333	0.22	0.11	0.12	0.05	down
chr2:114115400:114115527|114115497:+@chr2:114115828:114115911:+	RABL2A	0.26	0.13	0.26	0.12	0.07	0.06	0.216667	0.0833333	0.26	0.12	0.13	0.06	down
chr2:120389225:120390736|120389288:+@chr2:120394115:120394287:+	PTPN4	0.2	0.42	0.22	0.17	0.12	0.11	0.28	0.133333	0.42	0.17	0.2	0.11	down
chr2:144481219:144481572:-@chr2:144444690:144444799:-@chr2:144426810:144426880:-	GTDC1	0.81	0.76	0.72	0.58	0.69	0.7	0.763333	0.656667	0.81	0.7	0.72	0.58	down
chr2:170389245:170389670:-@chr2:170385848:170386029:-@chr2:170376424:170377262:-	METTL5	0.63	0.64	0.64	0.5	0.56	0.53	0.636667	0.53	0.64	0.56	0.63	0.5	down
chr2:171903940:171904310:-@chr2:171896560:171896623:-@chr2:171895315:171895454:-	METTL8	0.73	0.58	0.69	0.43	0.46	0.31	0.666667	0.4	0.73	0.46	0.58	0.31	down
chr2:173070949:173071074:+@chr2:173074746:173074875:+@chr2:173077065:173079433:+	ITGA6	0.74	0.73	0.68	0.35	0.37	0.33	0.716667	0.35	0.74	0.37	0.68	0.33	down
chr2:190269121:190269340:+@chr2:190277994:190278195:+@chr2:190279909:190280117:+	ANKAR	0.79	0.72	0.67	0.62	0.44	0.55	0.726667	0.536667	0.79	0.62	0.67	0.44	down
chr2:190357101:190357535:+@chr2:190358317:190358442:+@chr2:190364761:190364912:+	PMS1	0.55	0.55	0.51	0.3	0.29	0.5	0.536667	0.363333	0.55	0.5	0.51	0.29	down
chr2:208149600:208149662:+@chr2:208150079:208150193:+@chr2:208150474:208151034:+	CREB1	0.89	0.83	0.82	0.7	0.7	0.8	0.846667	0.733333	0.89	0.8	0.82	0.7	down
chr2:208310380:208310415:+@chr2:208313624:208313675:+@chr2:208315192:208315311:+	CCNYL1,MIR4775	0.79	0.9	0.83	0.69	0.72	0.75	0.84	0.72	0.9	0.75	0.79	0.69	down
chr2:219234373:219234512|219234487:+@chr2:219234726:219234920:+	BCS1L	0.92	0.85	0.95	0.72	0.81	0.8	0.906667	0.776667	0.95	0.81	0.85	0.72	down
chr2:220132191:220132463:-@chr2:220131150:220131425:-@chr2:220130309:220131076:-	OBSL1	0.89	0.87	0.91	0.81	0.66	0.78	0.89	0.75	0.91	0.81	0.87	0.66	down
chr2:241690341:241690420:-@chr2:241685331:241685515:-@chr2:241682365:241682520:-	MTERF4	0.92	0.86	0.76	0.7	0.56	0.75	0.846667	0.67	0.92	0.75	0.76	0.56	down
chr2:27738550:27738652:-@chr2:27737355:27737526:-	SUPT7L	0.81	0.86	0.82	0.75	0.67	0.68	0.83	0.7	0.86	0.75	0.81	0.67	down
chr2:3320795:3320927:-@chr2:3301635:3301736:-@chr2:3257117:3257197:-@chr2:3240077:3240233:-	TSSC1	0.24	0.23	0.39	0.18	0.12	0.21	0.286667	0.17	0.39	0.21	0.23	0.12	down
chr2:37322225:37323340|37322284:+@chr2:37324510:37324620:+	NDUFAF7	0.55	0.74	0.73	0.44	0.47	0.37	0.673333	0.426667	0.74	0.47	0.55	0.37	down
chr2:40592993:40593079:-@chr2:40533805:40533993:-@chr2:40509113:40510948:-	SLC8A1	0.35	0.32	0.35	0.22	0.2	0.27	0.34	0.23	0.35	0.27	0.32	0.2	down
chr2:53954980:53955135:-@chr2:53950005:53950179:-@chr2:53947388:53947521:-	PSME4	0.89	0.94	0.85	0.78	0.77	0.73	0.893333	0.76	0.94	0.78	0.85	0.73	down
chr2:55314003:55314064|55314061:+@chr2:55314759:55315602:+	RPS27A	0.46	0.49	0.48	0.4	0.41	0.29	0.476667	0.366667	0.49	0.41	0.46	0.29	down
chr2:63668835:63669438:-@chr2:63652013:63652264:-@chr2:63644770:63645262:-	WDPCP	0.82	0.73	0.73	0.37	0.69	0.33	0.76	0.463333	0.82	0.69	0.73	0.33	down
chr2:69512538:69512641:-@chr2:69504218:69504353:-@chr2:69500174:69500240:-	NFU1	0.88	0.81	0.92	0.74	0.74	0.8	0.87	0.76	0.92	0.8	0.81	0.74	down
chr2:74572639:74572690|74572686:+@chr2:74572774:74575198:+	TTC31	0.87	0.88	0.89	0.71	0.81	0.67	0.88	0.73	0.89	0.81	0.87	0.67	down
chr2:74611974:74612006:+@chr2:74612202:74612337:+	HTRA2	0.7	0.71	0.66	0.45	0.54	0.51	0.69	0.5	0.71	0.54	0.66	0.45	down
chr2:74636210:74636303:+@chr2:74636529:74636713:+@chr2:74636943:74638191:+	DOK1	0.78	0.84	0.77	0.65	0.69	0.61	0.796667	0.65	0.84	0.69	0.77	0.61	down
chr2:85436189:85436530|85436232:+@chr2:85437601:85438376:+	ELMOD3	0.77	0.72	0.76	0.62	0.61	0.69	0.75	0.64	0.77	0.69	0.72	0.61	down
chr2:98538448:98538703|98538586:+@chr2:98542358:98542390:+	INPP4A	0.9	0.83	0.86	0.75	0.76	0.61	0.863333	0.706667	0.9	0.76	0.83	0.61	down
chr3:109253476:109255521:-@chr3:109252115:109252139:-@chr3:109244629:109248829:-	CD47	0.47	0.5	0.43	0.2	0.15	0.18	0.466667	0.176667	0.5	0.2	0.43	0.15	down
chr3:114496224:114496358:-@chr3:114495489:114495575:-@chr3:114488467:114493285:-	CFAP44	0.94	0.86	0.83	0.74	0.81	0.7	0.876667	0.75	0.94	0.81	0.83	0.7	down
chr3:122870892:122870749|122870734:-@chr3:122869598:122869695:-	GOLGB1	0.35	0.45	0.27	0.17	0.21	0.26	0.356667	0.213333	0.45	0.26	0.27	0.17	down
chr3:122923799:122923915:-@chr3:122921183:122921287:-@chr3:122919925:122920038:-	GOLGB1	0.86	0.84	0.9	0.74	0.78	0.65	0.866667	0.723333	0.9	0.78	0.84	0.65	down
chr3:122923799:122923915:-@chr3:122921183:122921290:-@chr3:122919925:122920038:-	GOLGB1	0.86	0.85	0.85	0.68	0.7	0.69	0.853333	0.69	0.86	0.7	0.85	0.68	down
chr3:122923799:122923915:-@chr3:122921183:122921305:-@chr3:122919925:122920038:-	GOLGB1	0.91	0.92	0.86	0.74	0.76	0.65	0.896667	0.716667	0.92	0.76	0.86	0.65	down
chr3:122923799:122923915:-@chr3:122921287|122921305:122921183:-	GOLGB1	0.76	0.89	0.81	0.58	0.53	0.71	0.82	0.606667	0.89	0.71	0.76	0.53	down
chr3:127208647:127208758:-@chr3:127207928:127208097:-	SLC41A3	0.83	0.86	0.92	0.81	0.73	0.73	0.87	0.756667	0.92	0.81	0.83	0.73	down
chr3:12857993:12858081:-@chr3:12857455|12857591:12857269:-	RPL32	0.81	0.76	0.84	0.71	0.68	0.62	0.803333	0.67	0.84	0.71	0.76	0.62	down
chr3:132220040:132220250:-@chr3:132218524:132218583:-@chr3:132217589:132217873:-	ASTE1	0.17	0.24	0.29	0.03	0.06	0.1	0.233333	0.0633333	0.29	0.1	0.17	0.03	down
chr3:137528335:137528787|137528442:+@chr3:137529166:137529264:+	PCCB	0.86	0.82	0.79	0.75	0.62	0.62	0.823333	0.663333	0.86	0.75	0.79	0.62	down
chr3:139793386:139793488:-@chr3:139774391:139774516:-@chr3:139772798:139772888:-	CEP70	0.78	0.94	0.88	0.77	0.51	0.55	0.866667	0.61	0.94	0.77	0.78	0.51	down
chr3:153645761:153646018:+@chr3:153647183:153647236:+@chr3:153648099:153648252:+	MBNL1	0.62	0.69	0.63	0.51	0.46	0.45	0.646667	0.473333	0.69	0.51	0.62	0.45	down
chr3:173911331:173911835:-@chr3:173846107:173846176:-@chr3:173836400:173836571:-	NCEH1	0.89	0.9	0.91	0.76	0.85	0.69	0.9	0.766667	0.91	0.85	0.89	0.69	down
chr3:17524970:17525101:-@chr3:17444946:17445015:-@chr3:17422914:17423022:-	TBC1D5	0.82	0.77	0.78	0.74	0.71	0.51	0.79	0.653333	0.82	0.74	0.77	0.51	down
chr3:191086877:191087034:+@chr3:191089823:191089967:+@chr3:191094689:191097801:+	TP63	0.93	0.97	0.96	0.82	0.71	0.91	0.953333	0.813333	0.97	0.91	0.93	0.71	down
chr3:192570402:192570519:+@chr3:192575545:192576072:+@chr3:192580642:192580757:+	CCDC50	0.44	0.53	0.66	0.07	0.06	0.1	0.543333	0.0766667	0.66	0.1	0.44	0.06	down
chr3:199155319:199155046|199155025:-@chr3:199149928:199150043:-	IQCG	0.66	0.75	0.52	0.41	0.38	0.2	0.643333	0.33	0.75	0.41	0.52	0.2	down
chr3:20191551:20191501|20190745:-@chr3:20187535:20187728:-	SGO1	0.87	0.76	0.79	0.59	0.71	0.51	0.806667	0.603333	0.87	0.71	0.76	0.51	down
chr3:38153935:38155523:+@chr3:38156883:38157087:+@chr3:38157252:38157343:+	MYD88	0.91	0.87	0.85	0.74	0.8	0.71	0.876667	0.75	0.91	0.8	0.85	0.71	down
chr3:38512812:38514184:+@chr3:38517850|38517911:38517989:+	EXOG	0.46	0.64	0.33	0.27	0.23	0.28	0.476667	0.26	0.64	0.28	0.33	0.23	down
chr3:39117372:39117283|39117242:-@chr3:39116800:39116998:-	GORASP1	0.82	0.93	0.83	0.69	0.63	0.79	0.86	0.703333	0.93	0.79	0.82	0.63	down
chr3:42820932:42821036:-@chr3:42810653:42810767:-@chr3:42805035:42805377:-	HIGD1A	0.8	0.74	0.74	0.67	0.72	0.56	0.76	0.65	0.8	0.72	0.74	0.56	down
chr3:47008334:47008440:+@chr3:47008969:47009049:+@chr3:47010431:47010514:+	NBEAL2	0.54	0.38	0.65	0.15	0.04	0.2	0.523333	0.13	0.65	0.2	0.38	0.04	down
chr3:47434628:47434743:-@chr3:47434317|47434320:47433798:-	SCAP	0.22	0.28	0.28	0.1	0.12	0.2	0.26	0.14	0.28	0.2	0.22	0.1	down
chr3:48613408:48613555:-@chr3:48613117:48613224:-	UQCRC1	0.87	0.88	0.9	0.74	0.7	0.71	0.883333	0.716667	0.9	0.74	0.87	0.7	down
chr3:52760988:52761392:-@chr3:52758748:52758885:-@chr3:52756386:52756507:-	NEK4	0.93	0.83	0.84	0.52	0.74	0.8	0.866667	0.686667	0.93	0.8	0.83	0.52	down
chr3:58099049:58099296:+@chr3:58102625:58102663:+@chr3:58103417:58103519:+	FLNB	0.94	0.87	0.92	0.51	0.54	0.48	0.91	0.51	0.94	0.54	0.87	0.48	down
chr3:58099049:58099296:+@chr3:58102625:58102696:+@chr3:58103417:58103519:+	FLNB	0.97	0.93	0.96	0.71	0.74	0.73	0.953333	0.726667	0.97	0.74	0.93	0.71	down
chr3:58267014:58267184:+@chr3:58271057:58271173:+@chr3:58271274:58271358:+	RPP14	0.31	0.33	0.36	0.17	0.23	0.17	0.333333	0.19	0.36	0.23	0.31	0.17	down
chr3:58267014:58267184:+@chr3:58271076:58271173:+@chr3:58271274:58271358:+	RPP14	0.69	0.74	0.68	0.6	0.55	0.61	0.703333	0.586667	0.74	0.61	0.68	0.55	down
chr3:58394535:58394621:-@chr3:58392751|58394451:58392644:-	PDHB	0.55	0.47	0.44	0.32	0.28	0.26	0.486667	0.286667	0.55	0.32	0.44	0.26	down
chr3:58824324:58824658:-@chr3:58809798:58810175:-@chr3:58792452:58792655:-	C3orf67	0.65	0.67	0.72	0.62	0.55	0.48	0.68	0.55	0.72	0.62	0.65	0.48	down
chr3:62179565:62179697:+@chr3:62191939:62192025:+@chr3:62204521:62204612:+	PTPRG	0.25	0.2	0.23	0.12	0.06	0.16	0.226667	0.113333	0.25	0.16	0.2	0.06	down
chr3:62255415:62255493:-@chr3:62253329:62253432:-@chr3:62221580:62224857:-	PTPRG-AS1	0.81	0.87	0.84	0.77	0.34	0.7	0.84	0.603333	0.87	0.77	0.81	0.34	down
chr3:72980039:72980320:-@chr3:72976200:72976294:-@chr3:72974121:72974243:-	SHQ1	0.65	0.73	0.6	0.44	0.42	0.34	0.66	0.4	0.73	0.44	0.6	0.34	down
chr3:99152320:99152717:-@chr3:99151546|99151549:99151378:-	MINA	0.75	0.89	0.77	0.66	0.7	0.7	0.803333	0.686667	0.89	0.7	0.75	0.66	down
chr4:106858199:106858384|106858315:+@chr4:106859666:106860548:+	GSTCD	0.55	0.77	0.83	0.35	0.39	0.3	0.716667	0.346667	0.83	0.39	0.55	0.3	down
chr4:107461472:107462057|107461495:+@chr4:107465591:107465724:+	AIMP1	0.71	0.83	0.73	0.67	0.51	0.55	0.756667	0.576667	0.83	0.67	0.71	0.51	down
chr4:110870207:110870701:-@chr4:110859294:110859364:-@chr4:110858153:110858318:-	PLA2G12A	0.61	0.64	0.67	0.56	0.52	0.47	0.64	0.516667	0.67	0.56	0.61	0.47	down
chr4:144574094:144574319:+@chr4:144574691:144574771:+@chr4:144578602:144579203:+	GAB1	0.36	0.35	0.33	0.15	0.08	0.14	0.346667	0.123333	0.36	0.15	0.33	0.08	down
chr4:146905590:146905782:-@chr4:146903692:146903724:-@chr4:146898229:146902200:-	ZNF827	0.85	0.78	0.73	0.54	0.55	0.64	0.786667	0.576667	0.85	0.64	0.73	0.54	down
chr4:41363335:41363440:+@chr4:41367492:41367566:+@chr4:41368328:41368368:+	LIMCH1	0.13	0.16	0.27	0.07	0.01	0.04	0.186667	0.04	0.27	0.07	0.13	0.01	down
chr4:456364:456490:-@chr4:421235:421300:-@chr4:406991:410908:-	ABCA11P,ZNF721	0.45	0.55	0.51	0.42	0.25	0.39	0.503333	0.353333	0.55	0.42	0.45	0.25	down
chr4:56442922:56444851:+@chr4:56449811:56449855:+@chr4:56451146:56451309:+	EXOC1	0.89	0.93	0.86	0.73	0.64	0.76	0.893333	0.71	0.93	0.76	0.86	0.64	down
chr4:658001:658122:-@chr4:657697:657755:-@chr4:657092:657190:-	ATP5I	0.6	0.64	0.68	0.51	0.58	0.4	0.64	0.496667	0.68	0.58	0.6	0.4	down
chr4:76933867:76934078:+@chr4:76935513:76935533:+@chr4:76939799:76939909:+	USO1	0.52	0.45	0.32	0.02	0.02	0.02	0.43	0.02	0.52	0.02	0.32	0.02	down
chr4:77726318:77726646:+@chr4:77769043:77769160:+@chr4:77785476:77785982:+	SHROOM3	0.65	0.66	0.63	0.34	0.55	0.4	0.646667	0.43	0.66	0.55	0.63	0.34	down
chr4:8257794:8257993:+@chr4:8262375:8262449:+@chr4:8265328:8265853:+	SH3TC1	0.89	0.79	0.92	0.55	0.72	0.65	0.866667	0.64	0.92	0.72	0.79	0.55	down
chr4:84125053:84125001|84124338:-@chr4:84119060:84119183:-	LIN54	0.72	0.76	0.66	0.48	0.6	0.55	0.713333	0.543333	0.76	0.6	0.66	0.48	down
chr4:88076164:88076526:-@chr4:88073571:88073718:-@chr4:88072398:88072495:-	C4orf36,LOC100506746	0.86	0.89	0.85	0.84	0.59	0.73	0.866667	0.72	0.89	0.84	0.85	0.59	down
chr5:102383393:102383446:+@chr5:102388734:102388937:+@chr5:102391785:102391841:+	PAM	0.72	0.65	0.62	0.24	0.59	0.61	0.663333	0.48	0.72	0.61	0.62	0.24	down
chr5:127446326:127447337:-@chr5:127445782|127445785:127445564:-	LINC01184	0.63	0.48	0.57	0.28	0.38	0.38	0.56	0.346667	0.63	0.38	0.48	0.28	down
chr5:132127815:132128010:-@chr5:132127477|132127483:132127297:-	SEPT8	0.71	0.71	0.79	0.55	0.66	0.6	0.736667	0.603333	0.79	0.66	0.71	0.55	down
chr5:132390088:132390195:-@chr5:132386432:132386497:-@chr5:132370350:132370511:-	ZCCHC10	0.36	0.39	0.54	0.24	0.31	0.3	0.43	0.283333	0.54	0.31	0.36	0.24	down
chr5:140988310:140988390:-@chr5:140987865:140987963:-	HDAC3	0.68	0.64	0.64	0.3	0.29	0.58	0.653333	0.39	0.68	0.58	0.64	0.29	down
chr5:150387663:150388536:+@chr5:150388668:150388715:+	GPX3	0.83	0.89	0.79	0.63	0.76	0.75	0.836667	0.713333	0.89	0.76	0.79	0.63	down
chr5:150387663:150388541:+@chr5:150388668:150388715:+	GPX3	0.83	0.89	0.8	0.63	0.79	0.76	0.84	0.726667	0.89	0.79	0.8	0.63	down
chr5:150387663:150388541|150388536:+@chr5:150388668:150388747:+	GPX3	0.67	0.76	0.68	0.66	0.32	0.32	0.703333	0.433333	0.76	0.66	0.67	0.32	down
chr5:160690468:160690712:-@chr5:160685953:160686066:-@chr5:160648014:160654013:-	GABRB2	0.27	0.37	0.48	0.16	0.24	0.23	0.373333	0.21	0.48	0.24	0.27	0.16	down
chr5:176852012:176852042:-@chr5:176851414:176851532:-@chr5:176850617:176851027:-	PDLIM7	0.8	0.93	0.87	0.74	0.57	0.77	0.866667	0.693333	0.93	0.77	0.8	0.57	down
chr5:176892050:176892248:-@chr5:176891560:176891807:-@chr5:176890889:176891128:-	FAM193B	0.36	0.35	0.41	0.24	0.3	0.19	0.373333	0.243333	0.41	0.3	0.35	0.19	down
chr5:176892050:176892248:-@chr5:176891763:176891807:-@chr5:176890889:176891128:-	FAM193B	0.18	0.13	0.33	0.08	0.07	0.1	0.213333	0.0833333	0.33	0.1	0.13	0.07	down
chr5:178132036:178132238:-@chr5:178128077:178128271:-@chr5:178125968:178126942:-	AACSP1	0.83	0.84	0.84	0.68	0.69	0.82	0.836667	0.73	0.84	0.82	0.83	0.68	down
chr5:179182091:179182659:+@chr5:179183440|179183466:179183693:+	SQSTM1	0.6	0.58	0.58	0.51	0.31	0.47	0.586667	0.43	0.6	0.51	0.58	0.31	down
chr5:21497649:21497732:+@chr5:21537558:21537692:+@chr5:21621396:21622674:+	GUSBP1	0.6	0.48	0.59	0.25	0.4	0.45	0.556667	0.366667	0.6	0.45	0.48	0.25	down
chr5:37174579:37174707:-@chr5:37158289:37158347:-@chr5:37157476:37157643:-	C5orf42	0.88	0.87	0.9	0.85	0.84	0.53	0.883333	0.74	0.9	0.85	0.87	0.53	down
chr5:37194083:37194204:-@chr5:37193673|37193727:37193529:-	C5orf42	0.9	0.82	0.8	0.75	0.78	0.67	0.84	0.733333	0.9	0.78	0.8	0.67	down
chr5:38982327:38982411:-@chr5:38981469|38981583:38981350:-	RICTOR	0.92	0.88	0.95	0.74	0.85	0.78	0.916667	0.79	0.95	0.85	0.88	0.74	down
chr5:41969992:41970167:+@chr5:41975300:41975475:+@chr5:41977051:41977597:+	FBXO4	0.88	0.91	0.9	0.75	0.78	0.82	0.896667	0.783333	0.91	0.82	0.88	0.75	down
chr5:70893857:70894103:+@chr5:70894358:70894478:+@chr5:70896337:70899408:+	BDP1	0.43	0.45	0.45	0.27	0.37	0.34	0.443333	0.326667	0.45	0.37	0.43	0.27	down
chr5:86726617:86726677:-@chr5:86725978:86726057:-@chr5:86723019:86724477:-	CCNH	0.25	0.23	0.23	0.14	0.09	0.17	0.236667	0.133333	0.25	0.17	0.23	0.09	down
chr5:922360:922519:-@chr5:921722:921919:-@chr5:918529:918696:-	BRD9	0.31	0.45	0.42	0.23	0.22	0.24	0.393333	0.23	0.45	0.24	0.31	0.22	down
chr5:922360:922519:-@chr5:921722:922234:-@chr5:918529:918696:-	BRD9	0.3	0.4	0.36	0.2	0.22	0.25	0.353333	0.223333	0.4	0.25	0.3	0.2	down
chr5:93414587:93414688:-@chr5:93412192:93412292:-@chr5:93355907:93355965:-	FAM172A,MIR2277	0.74	0.8	0.75	0.72	0.63	0.63	0.763333	0.66	0.8	0.72	0.74	0.63	down
chr6:109880142:109880297:-@chr6:109879496:109879596:-	MICAL1	0.46	0.46	0.49	0.42	0.3	0.29	0.47	0.336667	0.49	0.42	0.46	0.29	down
chr6:135558579:135558748:+@chr6:135559557:135560154:+@chr6:135561739:135561881:+	MYB	0.68	0.75	0.67	0.57	0.37	0.46	0.7	0.466667	0.75	0.57	0.67	0.37	down
chr6:135558579:135558748:+@chr6:135559792:135560154:+@chr6:135561739:135561881:+	MYB	0.67	0.75	0.73	0.48	0.59	0.54	0.716667	0.536667	0.75	0.59	0.67	0.48	down
chr6:153361378:153361654:-@chr6:153358122|153358147:153357964:-	MTRF1L	0.7	0.83	0.64	0.63	0.54	0.49	0.723333	0.553333	0.83	0.63	0.64	0.49	down
chr6:157536813:157536943:+@chr6:157537673:157537831:+@chr6:157543795:157544004:+	ARID1B	0.49	0.47	0.54	0.36	0.43	0.37	0.5	0.386667	0.54	0.43	0.47	0.36	down
chr6:159002289:159002405|159002389:+@chr6:159003770:159006633:+	SYTL3	0.83	0.72	0.69	0.67	0.59	0.57	0.746667	0.61	0.83	0.67	0.69	0.57	down
chr6:168054813:168055018:+@chr6:168056932:168056952:+@chr6:168057697:168057842:+	AFDN	0.38	0.18	0.36	0.09	0.08	0.07	0.306667	0.08	0.38	0.09	0.18	0.07	down
chr6:17880118:17880269:-@chr6:17879324:17879428:-@chr6:17871903:17873156:-	KIF13A	0.88	0.82	0.86	0.51	0.45	0.44	0.853333	0.466667	0.88	0.51	0.82	0.44	down
chr6:26517622:26517940:+@chr6:26518101|26518213:26518239:+	BTN3A1	0.49	0.61	0.63	0.38	0.44	0.47	0.576667	0.43	0.63	0.47	0.49	0.38	down
chr6:26534389:26534730:+@chr6:26536078:26536314:+@chr6:26536850:26536992:+	BTN2A3P	0.8	0.78	0.78	0.66	0.64	0.47	0.786667	0.59	0.8	0.66	0.78	0.47	down
chr6:28429618:28432026:-@chr6:28417548|28417551:28417502:-	ZSCAN31	0.53	0.58	0.66	0.5	0.47	0.4	0.59	0.456667	0.66	0.5	0.53	0.4	down
chr6:30133871:30133946:-@chr6:30132847:30133473:-@chr6:30111186:30111739:-	ZNRD1ASP	0.84	0.9	0.85	0.75	0.79	0.54	0.863333	0.693333	0.9	0.79	0.84	0.54	down
chr6:30280412:30280521:-@chr6:30276791:30276839:-@chr6:30274422:30274909:-	TRIM26	0.8	0.88	0.87	0.69	0.64	0.57	0.85	0.633333	0.88	0.69	0.8	0.57	down
chr6:30632076:30633206:+@chr6:30637084:30637264:+@chr6:30637590:30637880:+	PRR3	0.57	0.61	0.53	0.26	0.37	0.39	0.57	0.34	0.61	0.39	0.53	0.26	down
chr6:30695249:30695745:+@chr6:30700639|30700642:30700698:+	MRPS18B	0.66	0.75	0.55	0.47	0.53	0.45	0.653333	0.483333	0.75	0.53	0.55	0.45	down
chr6:30722780:30723059:+@chr6:30726750:30726856:+@chr6:30727022:30727222:+	C6orf136	0.8	0.74	0.63	0.2	0.41	0.41	0.723333	0.34	0.8	0.41	0.63	0.2	down
chr6:30726750:30726856|30726838:+@chr6:30727022:30727222:+	C6orf136	0.38	0.37	0.33	0.05	0.2	0.23	0.36	0.16	0.38	0.23	0.33	0.05	down
chr6:3083274:3083412:+@chr6:3085619:3085742:+	BPHL	0.77	0.85	0.76	0.63	0.72	0.72	0.793333	0.69	0.85	0.72	0.76	0.63	down
chr6:33275997:33276426:-@chr6:33274116|33274219:33274063:-	RXRB	0.75	0.61	0.61	0.58	0.33	0.42	0.656667	0.443333	0.75	0.58	0.61	0.33	down
chr6:33369359:33369454:-@chr6:33369168:33369279:-	RGL2	0.2	0.17	0.32	0.11	0.09	0.13	0.23	0.11	0.32	0.13	0.17	0.09	down
chr6:33489164:33489316:+@chr6:33489491:33489586:+	PHF1	0.73	0.67	0.71	0.66	0.63	0.4	0.703333	0.563333	0.73	0.66	0.67	0.4	down
chr6:33489164:33489586|33489312:+@chr6:33489796:33489864:+	PHF1	0.8	0.64	0.65	0.51	0.5	0.48	0.696667	0.496667	0.8	0.51	0.64	0.48	down
chr6:36461289:36461424:-@chr6:36451626:36451790:-@chr6:36449208:36449333:-	ETV7	0.81	0.72	0.65	0.48	0.64	0.56	0.726667	0.56	0.81	0.64	0.65	0.48	down
chr6:36463291:36464149:-@chr6:36461289:36461424:-@chr6:36451585:36451790:-	ETV7	0.87	0.89	0.89	0.85	0.65	0.75	0.883333	0.75	0.89	0.85	0.87	0.65	down
chr6:41859178:41859321:+@chr6:41859450:41859954:+	PRICKLE4	0.87	0.89	0.87	0.81	0.63	0.76	0.876667	0.733333	0.89	0.81	0.87	0.63	down
chr6:42340420:42340570:-@chr6:42338976:42339284:-@chr6:42335055:42335439:-	TRERF1	0.79	0.83	0.66	0.61	0.58	0.62	0.76	0.603333	0.83	0.62	0.66	0.58	down
chr6:43573597:43573693:+@chr6:43574639|43574694:43574816:+	TJAP1	0.29	0.08	0.27	0.07	0.06	0.07	0.213333	0.0666667	0.29	0.07	0.08	0.06	down
chr6:43854604:43854633:+@chr6:43856447:43856518:+@chr6:43857671:43857802:+	VEGFA	0.26	0.44	0.36	0.17	0.18	0.18	0.353333	0.176667	0.44	0.18	0.26	0.17	down
chr6:52550064:52551150:+@chr6:52551259:52551351:+@chr6:52552132:52552366:+	TRAM2-AS1	0.59	0.61	0.68	0.36	0.38	0.34	0.626667	0.36	0.68	0.38	0.59	0.34	down
chr6:53033693:53033931:-@chr6:53018423:53018546:-@chr6:53013798:53014165:-	ICK	0.28	0.33	0.5	0.23	0.19	0.14	0.37	0.186667	0.5	0.23	0.28	0.14	down
chr6:58384248:58384096|58383595:-@chr6:58383110:58383305:-	GUSBP1,LINC00680	0.58	0.44	0.42	0.34	0.27	0.38	0.48	0.33	0.58	0.38	0.42	0.27	down
chr6:88335954:88336027:-@chr6:88330567:88330669:-@chr6:88321845:88321942:-	RARS2	0.79	0.82	0.82	0.68	0.65	0.78	0.81	0.703333	0.82	0.78	0.79	0.65	down
chr6:88419553:88419686:+@chr6:88423340|88423343:88423419:+	ORC3	0.8	0.59	0.57	0.51	0.43	0.36	0.653333	0.433333	0.8	0.51	0.57	0.36	down
chr6:91313698:91313827:-@chr6:91310992:91311072:-@chr6:91302777:91302841:-	MAP3K7	0.53	0.42	0.45	0.22	0.34	0.27	0.466667	0.276667	0.53	0.34	0.42	0.22	down
chr6:91328062:91328107:-@chr6:91326654|91326674:91326516:-	MAP3K7	0.48	0.44	0.6	0.34	0.22	0.4	0.506667	0.32	0.6	0.4	0.44	0.22	down
chr6:99897495:99897630:-@chr6:99887948:99888144:-@chr6:99846255:99846417:-	FAXC	0.87	0.88	0.89	0.69	0.81	0.83	0.88	0.776667	0.89	0.83	0.87	0.69	down
chr7:102015285:102015150|102014480:-@chr7:102011740:102011860:-	POLR2J3,RASA4,LOC102724229,POLR2J2	0.78	0.53	0.62	0.5	0.36	0.42	0.643333	0.426667	0.78	0.5	0.53	0.36	down
chr7:102176636:102177100:+@chr7:102179375:102179484:+@chr7:102185537:102185629:+	FAM185A	0.44	0.65	0.68	0.29	0.35	0.4	0.59	0.346667	0.68	0.4	0.44	0.29	down
chr7:128374313:128374346:+@chr7:128374568:128374825:+@chr7:128375019:128375411:+	IRF5	0.76	0.69	0.71	0.37	0.61	0.68	0.72	0.553333	0.76	0.68	0.69	0.37	down
chr7:137889983:137890251|137890149:+@chr7:137902766:137902939:+	TRIM24	0.82	0.79	0.77	0.71	0.68	0.68	0.793333	0.69	0.82	0.71	0.77	0.68	down
chr7:138694317:138695608:+@chr7:138698462:138698545:+@chr7:138706673:138706869:+	LUC7L2	0.29	0.51	0.34	0.23	0.27	0.25	0.38	0.25	0.51	0.27	0.29	0.23	down
chr7:142692166:142692189:+@chr7:142692563:142692660:+@chr7:142693156:142693417:+	TMEM139	0.8	0.56	0.56	0.49	0.48	0.47	0.64	0.48	0.8	0.49	0.56	0.47	down
chr7:142692167:142692660:+@chr7:142693156|142693159:142693417:+	TMEM139	0.9	0.86	0.86	0.7	0.76	0.67	0.873333	0.71	0.9	0.76	0.86	0.67	down
chr7:1478548:1478435|1478405:-@chr7:1477712:1477803:-	INTS1	0.23	0.15	0.15	0.05	0.08	0.06	0.176667	0.0633333	0.23	0.08	0.15	0.05	down
chr7:30028806:30028957:-@chr7:30026354:30026445:-@chr7:30025137:30025264:-	FKBP14	0.62	0.56	0.81	0.46	0.32	0.54	0.663333	0.44	0.81	0.54	0.56	0.32	down
chr7:30585147:30585269:-@chr7:30582705:30582851:-@chr7:30571657:30575130:-		0.36	0.59	0.61	0.31	0.31	0.31	0.52	0.31	0.61	0.31	0.36	0.31	down
chr7:44080522:44080654:-@chr7:44080255:44080357:-@chr7:44079907:44080149:-	POLM,MIR6838	0.62	0.65	0.69	0.43	0.42	0.54	0.653333	0.463333	0.69	0.54	0.62	0.42	down
chr7:50484915:50484755|50484737:-@chr7:50483373:50483481:-	FIGNL1	0.47	0.47	0.5	0.28	0.45	0.32	0.48	0.35	0.5	0.45	0.47	0.28	down
chr7:507279:507467:-@chr7:506594:506662:-@chr7:503421:504737:-	PDGFA	0.49	0.31	0.42	0.08	0.13	0.26	0.406667	0.156667	0.49	0.26	0.31	0.08	down
chr7:63660738:63660947:-@chr7:63641520:63641615:-@chr7:63633632:63633749:-	ZNF680	0.55	0.53	0.54	0.52	0.46	0.33	0.54	0.436667	0.55	0.52	0.53	0.33	down
chr7:65690934:65691002:-@chr7:65680951:65681149:-@chr7:65679177:65679354:-		0.72	0.31	0.51	0.21	0.1	0.25	0.513333	0.186667	0.72	0.25	0.31	0.1	down
chr7:74882806:74883194:+@chr7:74883317:74883405:+	NSUN5P1	0.9	0.95	0.91	0.73	0.81	0.89	0.92	0.81	0.95	0.89	0.9	0.73	down
chr7:74953077:74953504:-@chr7:74951513|74951532:74951411:-		0.25	0.19	0.33	0.1	0.15	0.13	0.256667	0.126667	0.33	0.15	0.19	0.1	down
chr7:75930698:75930962:+@chr7:75937467|75937553:75937672:+	DTX2	0.37	0.32	0.31	0.12	0.16	0.27	0.333333	0.183333	0.37	0.27	0.31	0.12	down
chr7:76797492:76797620:-@chr7:76796586:76796644:-	GSAP	0.39	0.42	0.51	0.2	0.15	0.29	0.44	0.213333	0.51	0.29	0.39	0.15	down
chr7:91584427:91584462:-@chr7:91584294:91584342:-	CYP51A1,LRRD1	0.66	0.58	0.55	0.51	0.48	0.46	0.596667	0.483333	0.66	0.51	0.55	0.46	down
chr7:91712677:91713163:-@chr7:91712384|91712421:91712152:-	KRIT1	0.91	0.92	0.9	0.77	0.81	0.82	0.91	0.8	0.92	0.82	0.9	0.77	down
chr7:93443152:93443348:-@chr7:93439823:93439911:-@chr7:93430020:93432935:-	BET1	0.71	0.61	0.66	0.24	0.59	0.48	0.66	0.436667	0.71	0.59	0.61	0.24	down
chr7:97437018:97437718:-@chr7:97434334:97434499:-@chr7:97433654:97434225:-		0.21	0.38	0.29	0.14	0.13	0.16	0.293333	0.143333	0.38	0.16	0.21	0.13	down
chr7:97437018:97437718:-@chr7:97436253:97436300:-@chr7:97433654:97434225:-		0.92	0.85	0.89	0.77	0.71	0.79	0.886667	0.756667	0.92	0.79	0.85	0.71	down
chr7:99526151:99526213:+@chr7:99526597:99526711:+	COPS6	0.63	0.66	0.69	0.4	0.49	0.54	0.66	0.476667	0.69	0.54	0.63	0.4	down
chr7:99659441:99659634:-@chr7:99658156:99658279:-@chr7:99636212:99638162:-	GATS	0.39	0.44	0.41	0.23	0.35	0.21	0.413333	0.263333	0.44	0.35	0.39	0.21	down
chr7:99781424:99781527:+@chr7:99785290|99785358:99785446:+	PILRB,MIR6840	0.78	0.88	0.8	0.55	0.61	0.71	0.82	0.623333	0.88	0.71	0.78	0.55	down
chr8:11666364:11666508|11666503:+@chr8:11674516:11674868:+	NEIL2	0.3	0.35	0.26	0.2	0.19	0.1	0.303333	0.163333	0.35	0.2	0.26	0.1	down
chr8:117847923:117848211:+@chr8:117860903:117861006:+@chr8:117867923:117868218:+	UTP23	0.22	0.2	0.37	0.15	0.16	0.13	0.263333	0.146667	0.37	0.16	0.2	0.13	down
chr8:144838667:144839225:+@chr8:144841075:144841172:+@chr8:144842820:144843459:+@chr8:144844215:144844281:+	ZNF707,LOC101928160	0.88	0.88	0.78	0.74	0.69	0.67	0.846667	0.7	0.88	0.74	0.78	0.67	down
chr8:144838667:144839225:+@chr8:144841539:144841636:+@chr8:144842820:144843459:+@chr8:144844215:144844281:+	ZNF707,LOC101928160	0.75	0.83	0.83	0.72	0.7	0.69	0.803333	0.703333	0.83	0.72	0.75	0.69	down
chr8:28962367:28962484:+@chr8:28962726:28962830:+@chr8:28963638:28965334:+	HMBOX1	0.35	0.28	0.42	0.18	0.19	0.2	0.35	0.19	0.42	0.2	0.28	0.18	down
chr8:30360602:30360755:-@chr8:30360186:30360420:-@chr8:30359178:30359673:-	RBPMS-AS1	0.43	0.54	0.54	0.29	0.4	0.4	0.503333	0.363333	0.54	0.4	0.43	0.29	down
chr8:608598:610737:-@chr8:565675:567238:-@chr8:554749:555284:-	ERICH1	0.87	0.81	0.76	0.65	0.71	0.59	0.813333	0.65	0.87	0.71	0.76	0.59	down
chr8:66737254:66737513|66737473:+@chr8:66744662:66744807:+	MTFR1	0.63	0.62	0.48	0.47	0.28	0.45	0.576667	0.4	0.63	0.47	0.48	0.28	down
chr8:86212419:86212586:+@chr8:86222900:86223093:+@chr8:86224279:86224426:+	LRRCC1	0.86	0.84	0.81	0.68	0.68	0.7	0.836667	0.686667	0.86	0.7	0.81	0.68	down
chr8:95946910:95947104|95947094:+@chr8:95947562:95947755:+	INTS8	0.35	0.19	0.18	0.13	0.13	0.14	0.24	0.133333	0.35	0.14	0.18	0.13	down
chr9:114858658:114858913:-@chr9:114851973|114851976:114851892:-	ZFP37	0.58	0.44	0.53	0.42	0.36	0.32	0.516667	0.366667	0.58	0.42	0.44	0.32	down
chr9:126186694:126186756:-@chr9:126159012|126159015:126158864:-	PSMB7	0.75	0.85	0.73	0.66	0.54	0.62	0.776667	0.606667	0.85	0.66	0.73	0.54	down
chr9:129729253:129729308:-@chr9:129727967:129728079:-@chr9:129727207:129727360:-	PIP5KL1	0.82	0.86	0.79	0.77	0.66	0.6	0.823333	0.676667	0.86	0.77	0.79	0.6	down
chr9:130522303:130522383|130522339:+@chr9:130522494:130523599:+	PKN3	0.52	0.6	0.63	0.45	0.43	0.47	0.583333	0.45	0.63	0.47	0.52	0.43	down
chr9:131725944:131726622:-@chr9:131718066:131718080:-@chr9:131710990:131711099:-	FNBP1	0.49	0.62	0.44	0.29	0.24	0.32	0.516667	0.283333	0.62	0.32	0.44	0.24	down
chr9:133375111:133375270:+@chr9:133375468:133375623:+	POMT1	0.82	0.75	0.82	0.74	0.59	0.6	0.796667	0.643333	0.82	0.74	0.75	0.59	down
chr9:133487004:133487206:-@chr9:133469169:133469261:-@chr9:133467269:133467357:-	RAPGEF1	0.15	0.22	0.18	0.08	0.06	0.02	0.183333	0.0533333	0.22	0.08	0.15	0.02	down
chr9:139091774:139092094:+@chr9:139092323:139092493:+@chr9:139092775:139092950:+	UAP1L1	0.82	0.89	0.82	0.54	0.81	0.63	0.843333	0.66	0.89	0.81	0.82	0.54	down
chr9:139091774:139092094:+@chr9:139092323:139092527:+@chr9:139092775:139092950:+	UAP1L1	0.94	0.93	0.93	0.8	0.85	0.83	0.933333	0.826667	0.94	0.85	0.93	0.8	down
chr9:139590353:139590440:-@chr9:139589982:139590165:-@chr9:139589025:139589119:-	DPH7	0.75	0.75	0.7	0.51	0.29	0.57	0.733333	0.456667	0.75	0.57	0.7	0.29	down
chr9:139627888:139627937:+@chr9:139628210|139628254:139628487:+	ARRDC1	0.5	0.45	0.5	0.34	0.3	0.12	0.483333	0.253333	0.5	0.34	0.45	0.12	down
chr9:2151686:2151903:+@chr9:2160419:2160472:+@chr9:2171571:2171676:+	SMARCA2	0.12	0.2	0.27	0.06	0.04	0.11	0.196667	0.07	0.27	0.11	0.12	0.04	down
chr9:35082540:35082764:-@chr9:35081237:35081288:-	PIGO	0.7	0.67	0.86	0.6	0.4	0.59	0.743333	0.53	0.86	0.6	0.67	0.4	down
chr9:37790664:37790732:-@chr9:37788628:37788725:-@chr9:37779205:37781239:-	EXOSC3	0.58	0.67	0.62	0.56	0.53	0.47	0.623333	0.52	0.67	0.56	0.58	0.47	down
chr9:41944749:41945140:-@chr9:41944504:41944605:-@chr9:41913400:41913962:-		0.46	0.35	0.46	0.29	0.32	0.3	0.423333	0.303333	0.46	0.32	0.35	0.29	down
chr9:4619091:4619168:-@chr9:4616426:4616555:-@chr9:4615217:4615566:-	SPATA6L	0.84	0.9	0.81	0.43	0.66	0.6	0.85	0.563333	0.9	0.66	0.81	0.43	down
chr9:4619091:4619168:-@chr9:4617753:4617856:-@chr9:4615217:4615566:-	SPATA6L	0.33	0.39	0.47	0.19	0.19	0.27	0.396667	0.216667	0.47	0.27	0.33	0.19	down
chr9:5524745:5525050:+@chr9:5539335:5539604:+@chr9:5547618:5547752:+	PDCD1LG2	0.84	0.81	0.78	0.71	0.49	0.75	0.81	0.65	0.84	0.75	0.78	0.49	down
chr9:5795611:5795785:-@chr9:5795027:5795217:-@chr9:5791176:5791328:-	ERMP1	0.58	0.57	0.71	0.53	0.53	0.49	0.62	0.516667	0.71	0.53	0.57	0.49	down
chr9:68135352:68135787:+@chr9:68139081:68139224:+@chr9:68156943:68157131:+		0.67	0.63	0.65	0.49	0.47	0.5	0.65	0.486667	0.67	0.5	0.63	0.47	down
chr9:76887823:76887886:-@chr9:76883318|76883347:76883062:-	NMRK1	0.73	0.66	0.78	0.51	0.44	0.65	0.723333	0.533333	0.78	0.65	0.66	0.44	down
chr9:88106011:88106336:-@chr9:88103934:88104007:-@chr9:88103502:88103565:-	ZCCHC6	0.67	0.77	0.71	0.25	0.12	0.16	0.716667	0.176667	0.77	0.25	0.67	0.12	down
chr9:91260623:91260688:-@chr9:91222791:91222853:-@chr9:91210086:91210434:-	SEMA4D	0.7	0.72	0.81	0.63	0.42	0.69	0.743333	0.58	0.81	0.69	0.7	0.42	down
chr9:94820239:94820318:+@chr9:94821934:94821964:+@chr9:94822420:94822721:+	FGD3	0.81	0.79	0.79	0.7	0.37	0.78	0.796667	0.616667	0.81	0.78	0.79	0.37	down
chr9:94912671:94912824:+@chr9:94913982:94914041:+@chr9:94914321:94914392:+	CARD19	0.81	0.88	0.89	0.72	0.7	0.75	0.86	0.723333	0.89	0.75	0.81	0.7	down
chr9:96602860:96603105:+@chr9:96726089:96726278:+@chr9:96757280:96757382:+	MIR2278,,,C9orf3,MIR24-1	0.61	0.81	0.66	0.57	0.49	0.42	0.693333	0.493333	0.81	0.57	0.61	0.42	down
chr9:99715078:99714981|99714976:-@chr9:99711687:99712719:-	TRMO	0.81	0.85	0.87	0.74	0.7	0.7	0.843333	0.713333	0.87	0.74	0.81	0.7	down
chrX:101862541:101862611:+@chrX:101889401:101889495:+@chrX:101890283:101895129:+	BHLHB9	0.68	0.75	0.78	0.64	0.5	0.67	0.736667	0.603333	0.78	0.67	0.68	0.5	down
chrX:101862541:101862611:+@chrX:101889417:101889495:+@chrX:101890283:101895129:+	BHLHB9	0.76	0.71	0.64	0.5	0.46	0.6	0.703333	0.52	0.76	0.6	0.64	0.46	down
chrX:102727443:102727691:+@chrX:102727803:102727875:+	TCEAL4	0.87	0.74	0.8	0.51	0.61	0.63	0.803333	0.583333	0.87	0.63	0.74	0.51	down
chrX:102826265:102826327:-@chrX:102820184|102820235:102820083:-	MORF4L2	0.55	0.75	0.62	0.5	0.52	0.54	0.64	0.52	0.75	0.54	0.55	0.5	down
chrX:108863024:108863288:-@chrX:108813260|108813303:108813021:-	ACSL4	0.41	0.58	0.58	0.17	0.36	0.35	0.523333	0.293333	0.58	0.36	0.41	0.17	down
chrX:108863024:108863288:-@chrX:108813260|108813437:108813021:-	ACSL4	0.39	0.5	0.43	0.21	0.31	0.3	0.44	0.273333	0.5	0.31	0.39	0.21	down
chrX:108863024:108863288:-@chrX:108813260|108813551:108813021:-	ACSL4	0.38	0.45	0.46	0.26	0.27	0.28	0.43	0.27	0.46	0.28	0.38	0.26	down
chrX:118859067:118859249:-@chrX:118858637:118858675:-@chrX:118856358:118856518:-	UPF3B	0.23	0.27	0.27	0.08	0.1	0.14	0.256667	0.106667	0.27	0.14	0.23	0.08	down
chrX:128458408:128458529:-@chrX:128454698:128454733:-@chrX:128453599:128453751:-	SMARCA1	0.52	0.64	0.61	0.36	0.44	0.47	0.59	0.423333	0.64	0.47	0.52	0.36	down
chrX:131451523:131451677:-@chrX:131401144:131401281:-@chrX:131367806:131368101:-	MBNL3	0.78	0.67	0.63	0.38	0.53	0.55	0.693333	0.486667	0.78	0.55	0.63	0.38	down
chrX:133508248:133508407:-@chrX:133507648:133507852:-@chrX:133506121:133506493:-	MIR503,MIR503HG,MIR424	0.4	0.47	0.33	0.2	0.31	0.2	0.4	0.236667	0.47	0.31	0.33	0.2	down
chrX:133743517:133743613:-@chrX:133733050|133733979:133731270:-	FAM122B	0.93	0.92	0.85	0.72	0.8	0.81	0.9	0.776667	0.93	0.81	0.85	0.72	down
chrX:133743517:133743613:-@chrX:133733139:133733979:-@chrX:133731262:133733050:-	FAM122B	0.83	0.87	0.76	0.62	0.71	0.71	0.82	0.68	0.87	0.71	0.76	0.62	down
chrX:149750362:149750424:-@chrX:149747437:149748735:-@chrX:149735410:149735586:-	CD99L2	0.56	0.79	0.64	0.24	0.41	0.4	0.663333	0.35	0.79	0.41	0.56	0.24	down
chrX:153437574:153437785:+@chrX:153439941:153440059:+@chrX:153443097:153443197:+		0.93	0.89	0.91	0.77	0.82	0.77	0.91	0.786667	0.93	0.82	0.89	0.77	down
chrX:153437574:153437785:+@chrX:153439944:153440059:+@chrX:153443097:153443197:+		0.28	0.31	0.48	0.21	0.14	0.24	0.356667	0.196667	0.48	0.24	0.28	0.14	down
chrX:17620376:17620509:+@chrX:17647385:17647447:+@chrX:17649482:17649674:+	NHS	0.89	0.94	0.89	0.7	0.72	0.8	0.906667	0.74	0.94	0.8	0.89	0.7	down
chrX:23711211:23711747:+@chrX:23711838:23712129:+@chrX:23713366:23713467:+	SAT1	0.61	0.62	0.61	0.44	0.49	0.51	0.613333	0.48	0.62	0.51	0.61	0.44	down
chrX:23711211:23711747:+@chrX:23711838:23712441:+@chrX:23713366:23713467:+	SAT1	0.93	0.93	0.88	0.78	0.76	0.8	0.913333	0.78	0.93	0.8	0.88	0.76	down
chrX:48806434:48806592|48806476:+@chrX:48806710:48806800:+	CCDC120	0.8	0.79	0.64	0.62	0.6	0.41	0.743333	0.543333	0.8	0.62	0.64	0.41	down
chrX:48806434:48806592|48806533:+@chrX:48806710:48806800:+	CCDC120	0.86	0.89	0.85	0.66	0.63	0.69	0.866667	0.66	0.89	0.69	0.85	0.63	down
chrX:52944810:52945296|52945292:+@chrX:52946322:52946411:+	FAM156B	0.59	0.73	0.6	0.5	0.46	0.48	0.64	0.48	0.73	0.5	0.59	0.46	down
chrX:64112930:64113138:-@chrX:64058586|64058848:64058422:-	ZC4H2	0.5	0.52	0.31	0.23	0.21	0.29	0.443333	0.243333	0.52	0.29	0.31	0.21	down
chrX:71631731:71631843:-@chrX:71627504:71627575:-@chrX:71625508:71625616:-	HDAC8	0.72	0.78	0.85	0.67	0.69	0.43	0.783333	0.596667	0.85	0.69	0.72	0.43	down
chrX:74437427:74437575|74437525:+@chrX:74439965:74441457:+	UPRT	0.27	0.39	0.19	0.13	0.13	0.14	0.283333	0.133333	0.39	0.14	0.19	0.13	down
chrX:77052809:77052988:+@chrX:77104776:77104967:+@chrX:77113774:77113914:+	ATP7A	0.29	0.32	0.51	0.22	0.21	0.07	0.373333	0.166667	0.51	0.22	0.29	0.07	down
chrX:80263690:80263850:-@chrX:80260885:80260914:-@chrX:80260587:80260640:-	HMGN5	0.62	0.7	0.49	0.33	0.45	0.46	0.603333	0.413333	0.7	0.46	0.49	0.33	down

## Sheet: HCT116_AS_diffpsi0.1
Supplementary File 1b. List of alternative splicing targets between HCT116 EpCAMlo and EpCAMhi subpopulation, filtered by ΔPSI > 0.1
event_name	symbol	psi_HCT116_CD44highEpCAMhigh2_GTGAAA	psi_HCT116_CD44highEpCAMhigh_AGTCAA	psi_HCT116_CD44highEpCAMhigh_CCGTCC	psi_HCT116_CD44highEpCAMlow2_ACAGTG	psi_HCT116_CD44highEpCAMlow_ATGTCA	psi_HCT116_CD44highEpCAMlow_GTCCGC	psi_mean_group1	psi_mean_group2	psi_max_group1	psi_max_group2	psi_min_group1	psi_min_group2	change_type
chr10:100180318:100180417:-@chr10:100179538:100179636:-@chr10:100178890:100179389:-	HPS1	0.29	0.12	0.35	0.36	0.39	0.43	0.253333	0.393333	0.35	0.43	0.12	0.36	up
chr10:104126682:104126887|104126875:+@chr10:104129031:104129181:+	GBF1	0.32	0.34	0.33	0.52	0.41	0.38	0.33	0.436667	0.34	0.52	0.32	0.38	up
chr10:104199934:104200077:+@chr10:104201837:104201934:+@chr10:104205084:104206044:+		0.4	0.39	0.4	0.45	0.78	0.62	0.396667	0.616667	0.4	0.78	0.39	0.45	up
chr10:105201903:105202152:-@chr10:105200830:105200948:-@chr10:105198861:105200547:-	CALHM2	0.44	0.56	0.51	0.71	0.63	0.69	0.503333	0.676667	0.56	0.71	0.44	0.63	up
chr10:114196737:114197215:+@chr10:114197528:114197531:+@chr10:114198130:114198237:+	VTI1A	0.19	0.28	0.07	0.53	0.35	0.32	0.18	0.4	0.28	0.53	0.07	0.32	up
chr10:123268186:123268333:-@chr10:123266823:123266967:-@chr10:123264621:123264823:-	FGFR2	0.09	0.04	0.01	0.39	0.18	0.37	0.0466667	0.313333	0.09	0.39	0.01	0.18	up
chr10:126453234:126453456:-@chr10:126445783:126445906:-@chr10:126443951:126444167:-	METTL10	0.14	0.06	0.12	0.17	0.32	0.16	0.106667	0.216667	0.14	0.32	0.06	0.16	up
chr10:126838878:126839131:-@chr10:126812071:126812171:-@chr10:126789524:126789652:-	CTBP2	0.18	0.08	0.16	0.32	0.34	0.23	0.14	0.296667	0.18	0.34	0.08	0.23	up
chr10:133597943:133598049:+@chr10:133598388:133598500:+@chr10:133603525:133603690:+	PPP2R2D	0.08	0.08	0.06	0.14	0.36	0.11	0.0733333	0.203333	0.08	0.36	0.06	0.11	up
chr10:17310264:17310529:+@chr10:17311281|17311466:17311990:+	VIM	0.61	0.68	0.87	0.99	0.93	0.98	0.72	0.966667	0.87	0.99	0.61	0.93	up
chr10:17310547:17311990:+@chr10:17312655:17312715:+@chr10:17315592:17315691:+	VIM	0.84	0.71	0.68	0.98	0.91	0.93	0.743333	0.94	0.84	0.98	0.68	0.91	up
chr10:17310547:17311990:+@chr10:17312655:17312719:+@chr10:17315592:17315691:+	VIM	0.73	0.52	0.45	0.82	0.8	0.8	0.566667	0.806667	0.73	0.82	0.45	0.8	up
chr10:27094153:27094253:-@chr10:27084590:27084676:-@chr10:27080533:27080718:-	ABI1	0.54	0.39	0.53	0.72	0.7	0.67	0.486667	0.696667	0.54	0.72	0.39	0.67	up
chr10:31789972:31790172:+@chr10:31824711:31824773:+@chr10:31831282:31831443:+	ZEB1	0.61	0.83	0.79	0.84	0.85	0.95	0.743333	0.88	0.83	0.95	0.61	0.84	up
chr10:6662401:6662895:+@chr10:6664106:6664169:+@chr10:6665644:6666531:+		0.26	0.37	0.46	0.53	0.47	0.52	0.363333	0.506667	0.46	0.53	0.26	0.47	up
chr10:72752513:72752817:+@chr10:72773972:72774054:+@chr10:72781325:72781551:+	SLC29A3	0.66	0.67	0.68	0.83	0.8	0.69	0.67	0.773333	0.68	0.83	0.66	0.69	up
chr10:73765367:73765695:-@chr10:73764269:73764381:-	DNAJB12	0.39	0.43	0.56	0.58	0.7	0.59	0.46	0.623333	0.56	0.7	0.39	0.58	up
chr10:74554764:74555007:+@chr10:74556437:74556591:+@chr10:74560467:74561618:+	NUDT13	0.46	0.6	0.66	0.67	0.71	0.79	0.573333	0.723333	0.66	0.79	0.46	0.67	up
chr10:75232845:75232773|75232736:-@chr10:75231104:75232540:-	NDST2	0.67	0.59	0.76	0.82	0.82	0.89	0.673333	0.843333	0.76	0.89	0.59	0.82	up
chr10:79466958:79467068:+@chr10:79469968:79469989:+@chr10:79470379:79470511:+	RPS24	0.3	0.26	0.28	0.48	0.38	0.42	0.28	0.426667	0.3	0.48	0.26	0.38	up
chr10:82254464:82254514:+@chr10:82256935|82256964:82257110:+	TSPAN14	0.07	0.12	0.11	0.15	0.34	0.13	0.1	0.206667	0.12	0.34	0.07	0.13	up
chr10:95145889:95145971:-@chr10:95142664:95142702:-@chr10:95138777:95138901:-	MYOF	0.25	0.46	0.44	0.68	0.76	0.6	0.383333	0.68	0.46	0.76	0.25	0.6	up
chr10:97654577:97654685:-@chr10:97648634:97648765:-@chr10:97627972:97628010:-@chr10:97625986:97626407:-	ENTPD1-AS1	0.33	0.29	0.53	0.58	0.58	0.65	0.383333	0.603333	0.53	0.65	0.29	0.58	up
chr10:99884371:99884453:+@chr10:99885183:99885279:+@chr10:99941757:99941849:+@chr10:99957848:99959646:+	R3HCC1L	0.38	0.37	0.41	0.61	0.42	0.53	0.386667	0.52	0.41	0.61	0.37	0.42	up
chr11:102442506:102442398|102442394:-@chr11:102442208:102442312:-	DCUN1D5	0.09	0.09	0.06	0.2	0.38	0.1	0.08	0.226667	0.09	0.38	0.06	0.1	up
chr11:105453249:105453701:-@chr11:105452444:105452644:-@chr11:105434673:105435046:-	KBTBD3	0.53	0.67	0.66	0.77	0.71	0.91	0.62	0.796667	0.67	0.91	0.53	0.71	up
chr11:117908834:117909132:+@chr11:117909345:117909476:+@chr11:117909782:117909812:+	TMEM25	0.55	0.61	0.59	0.77	0.8	0.72	0.583333	0.763333	0.61	0.8	0.55	0.72	up
chr11:118467320:118467446:+@chr11:118468045|118468324:118468443:+	HMBS	0.36	0.35	0.3	0.58	0.73	0.48	0.336667	0.596667	0.36	0.73	0.3	0.48	up
chr11:124252267:124252764:+@chr11:124253404:124253542:+@chr11:124253690:124254447:+	ROBO3	0.64	0.61	0.56	0.86	0.69	0.65	0.603333	0.733333	0.64	0.86	0.56	0.65	up
chr11:124477840:124477915:-@chr11:124477238:124477423:-	TMEM218	0.49	0.43	0.4	0.65	0.57	0.67	0.44	0.63	0.49	0.67	0.4	0.57	up
chr11:1436985:1437045:+@chr11:1438306|1438776:1439520:+	BRSK2	0.39	0.27	0.4	0.67	0.54	0.43	0.353333	0.546667	0.4	0.67	0.27	0.43	up
chr11:1436985:1437045:+@chr11:1438354|1438776:1439919:+	BRSK2	0.5	0.4	0.49	0.8	0.61	0.7	0.463333	0.703333	0.5	0.8	0.4	0.61	up
chr11:3738432:3738345|3738294:-@chr11:3731122:3731214:-	NUP98	0.33	0.26	0.33	0.64	0.55	0.43	0.306667	0.54	0.33	0.64	0.26	0.43	up
chr11:44928804:44929184:-@chr11:44919130:44919204:-@chr11:44917293:44917422:-@chr11:44916334:44916493:-	TP53I11	0.24	0.17	0.24	0.37	0.34	0.31	0.216667	0.34	0.24	0.37	0.17	0.31	up
chr11:57285810:57286094:+@chr11:57313085:57313203:+@chr11:57315433:57315721:+	CTNND1	0.08	0.11	0.11	0.33	0.45	0.45	0.1	0.41	0.11	0.45	0.08	0.33	up
chr11:57285810:57286094:+@chr11:57315433:57315721:+@chr11:57318058:57318129:+	CTNND1	0.05	0.08	0.04	0.34	0.17	0.09	0.0566667	0.2	0.08	0.34	0.04	0.09	up
chr11:57285810:57286167:+@chr11:57315433|57315540:57315721:+	CTNND1	0.53	0.55	0.21	0.83	0.75	0.76	0.43	0.78	0.55	0.83	0.21	0.75	up
chr11:57313085:57313203:+@chr11:57315433|57315542:57315721:+	CTNND1	0.79	0.81	0.84	0.93	0.9	0.95	0.813333	0.926667	0.84	0.95	0.79	0.9	up
chr11:60454558:60454707:+@chr11:60455734|60455737:60455932:+	TMEM132A	0.41	0.49	0.37	0.65	0.53	0.54	0.423333	0.573333	0.49	0.65	0.37	0.53	up
chr11:62405748:62406114:+@chr11:62406553:62406666:+@chr11:62406715:62406855:+@chr11:62406956:62408573:+	SLC3A2	0.12	0.16	0.11	0.54	0.3	0.29	0.13	0.376667	0.16	0.54	0.11	0.29	up
chr11:6369190:6369962:+@chr11:6371022:6371193:+@chr11:6371423:6371499:+	SMPD1	0.64	0.74	0.71	0.88	0.8	0.89	0.696667	0.856667	0.74	0.89	0.64	0.8	up
chr11:63749547:63749628:-@chr11:63748849:63749018:-	TRPT1	0.4	0.38	0.43	0.44	0.72	0.47	0.403333	0.543333	0.43	0.72	0.38	0.44	up
chr11:63750098:63750301:-@chr11:63749018|63749628:63748849:-	TRPT1	0.5	0.48	0.57	0.6	0.65	0.65	0.516667	0.633333	0.57	0.65	0.48	0.6	up
chr11:65064292:65064499:-@chr11:65064060:65064200:-@chr11:65063767:65063928:-	LTBP3	0.21	0.19	0.14	0.45	0.37	0.25	0.18	0.356667	0.21	0.45	0.14	0.25	up
chr11:65526087:65526212:-@chr11:65524528|65524552:65524350:-	EIF1AD	0.31	0.34	0.34	0.37	0.6	0.38	0.33	0.45	0.34	0.6	0.31	0.37	up
chr11:66808894:66809030:+@chr11:66809122:66809235:+	GRK2	0.08	0.11	0.14	0.28	0.21	0.19	0.11	0.226667	0.14	0.28	0.08	0.19	up
chr11:66808894:66809030:+@chr11:66809125:66809235:+	GRK2	0.15	0.15	0.32	0.68	0.45	0.38	0.206667	0.503333	0.32	0.68	0.15	0.38	up
chr11:696113:696288:+@chr11:696674:696801:+@chr11:699330:699451:+	EPS8L2	0.25	0.21	0.3	0.51	0.47	0.37	0.253333	0.45	0.3	0.51	0.21	0.37	up
chr11:70863089:70864316|70863220:+@chr11:70864895:70865706:+	NADSYN1	0.69	0.68	0.64	0.84	0.74	0.79	0.67	0.79	0.69	0.84	0.64	0.74	up
chr11:788217:788315:-@chr11:786043:786367:-@chr11:784987:785169:-	SLC25A22	0.25	0.23	0.23	0.74	0.51	0.28	0.236667	0.51	0.25	0.74	0.23	0.28	up
chr11:85103104:85104423:-@chr11:85098068|85098191:85098022:-	SYTL2	0.58	0.5	0.52	0.74	0.6	0.77	0.533333	0.703333	0.58	0.77	0.5	0.6	up
chr11:854437:854511:+@chr11:855694:855825:+	TSPAN4	0.47	0.21	0.54	0.6	0.57	0.64	0.406667	0.603333	0.54	0.64	0.21	0.57	up
chr11:8680695:8681734:-@chr11:8677980:8678135:-@chr11:8677336:8677513:-	ST5	0.31	0.28	0.23	0.35	0.36	0.43	0.273333	0.38	0.31	0.43	0.23	0.35	up
chr11:93107439:93108066:-@chr11:93106211|93106233:93106164:-	SNORA18,SNORA40,TAF1D,MIR1304	0.2	0.15	0.12	0.39	0.26	0.33	0.156667	0.326667	0.2	0.39	0.12	0.26	up
chr12:100634637:100634721:+@chr12:100635146:100635303:+@chr12:100638032:100639967:+	CHPT1	0.35	0.12	0.07	0.46	0.44	0.38	0.18	0.426667	0.35	0.46	0.07	0.38	up
chr12:101041422:101041949:+@chr12:101045055:101045207:+@chr12:101055045:101055152:+@chr12:101066138:101066914:+	PARPBP	0.09	0.09	0.07	0.27	0.2	0.13	0.0833333	0.2	0.09	0.27	0.07	0.13	up
chr12:108869444:108869692:-@chr12:108867448:108867537:-@chr12:108861353:108861435:-	GIT2	0.42	0.46	0.36	0.48	0.51	0.63	0.413333	0.54	0.46	0.63	0.36	0.48	up
chr12:112101331:112101519:-@chr12:112101165:112101210:-	DDX54	0.16	0.12	0.06	0.2	0.3	0.23	0.113333	0.243333	0.16	0.3	0.06	0.2	up
chr12:131030192:131030291:+@chr12:131031987:131032094:+@chr12:131032591:131033467:+	EP400	0.33	0.36	0.28	0.49	0.46	0.44	0.323333	0.463333	0.36	0.49	0.28	0.44	up
chr12:2856627:2856709:+@chr12:2864710:2864919:+@chr12:2867338:2868952:+	RHNO1,TULP3	0.86	0.73	0.8	0.93	0.9	0.92	0.796667	0.916667	0.86	0.93	0.73	0.9	up
chr12:38010815:38010980:-@chr12:38010311:38010331:-@chr12:38006333:38006393:-	KIF21A	0.1	0.14	0.11	0.31	0.4	0.27	0.116667	0.326667	0.14	0.4	0.1	0.27	up
chr12:42448173:42448342:+@chr12:42451290:42451435:+@chr12:42452250:42452432:+	IRAK4	0.38	0.35	0.46	0.56	0.54	0.66	0.396667	0.586667	0.46	0.66	0.35	0.54	up
chr12:47866508:47866494|47866360:-@chr12:47864829:47866040:-	TUBA1A	0.37	0.37	0.33	0.43	0.52	0.54	0.356667	0.496667	0.37	0.54	0.33	0.43	up
chr12:47866556:47866883:-@chr12:47866360:47866479:-	TUBA1A	0.08	0.06	0.08	0.1	0.3	0.19	0.0733333	0.196667	0.08	0.3	0.06	0.1	up
chr12:47866587:47866883:-@chr12:47866360:47866464:-	TUBA1A	0.1	0.11	0.07	0.12	0.38	0.22	0.0933333	0.24	0.11	0.38	0.07	0.12	up
chr12:47866657:47866883:-@chr12:47866502|47866508:47866360:-	TUBA1A	0.16	0.18	0.19	0.51	0.66	0.22	0.176667	0.463333	0.19	0.66	0.16	0.22	up
chr12:47866661:47866883:-@chr12:47866360:47866451:-@chr12:47864829:47866040:-	TUBA1A	0.56	0.58	0.53	0.68	0.83	0.81	0.556667	0.773333	0.58	0.83	0.53	0.68	up
chr12:47866661:47866883:-@chr12:47866360:47866502:-@chr12:47864829:47866040:-	TUBA1A	0.5	0.5	0.45	0.58	0.7	0.75	0.483333	0.676667	0.5	0.75	0.45	0.58	up
chr12:47866661:47866883:-@chr12:47866360:47866508:-@chr12:47864829:47866040:-	TUBA1A	0.68	0.68	0.62	0.75	0.85	0.92	0.66	0.84	0.68	0.92	0.62	0.75	up
chr12:47866661:47866883:-@chr12:47866494:47866508:-@chr12:47866360:47866451:-@chr12:47864829:47866040:-	TUBA1A	0.64	0.63	0.58	0.73	0.8	0.75	0.616667	0.76	0.64	0.8	0.58	0.73	up
chr12:47866883:47866661|47866360:-@chr12:47864829:47866040:-	TUBA1A	0.27	0.26	0.23	0.32	0.4	0.43	0.253333	0.383333	0.27	0.43	0.23	0.32	up
chr12:48322285:48322725:+@chr12:48322977|48322980:48323066:+	PRPF40B	0.45	0.3	0.39	0.55	0.64	0.52	0.38	0.57	0.45	0.64	0.3	0.52	up
chr12:50070901:50070988:-@chr12:50063512:50063633:-@chr12:50059342:50059935:-	GALNT6	0.67	0.41	0.74	0.79	0.75	0.83	0.606667	0.79	0.74	0.83	0.41	0.75	up
chr12:52393151:52393257:-@chr12:52391170:52392172:-	CALCOCO1	0.26	0.35	0.35	0.38	0.6	0.44	0.32	0.473333	0.35	0.6	0.26	0.38	up
chr12:54677215:54677390:+@chr12:54682263:54682771:+@chr12:54683669:54685578:+	SUOX	0.36	0.33	0.39	0.51	0.77	0.42	0.36	0.566667	0.39	0.77	0.33	0.42	up
chr12:54682263:54682771|54682322:+@chr12:54683669:54685578:+	SUOX	0.38	0.33	0.36	0.44	0.76	0.42	0.356667	0.54	0.38	0.76	0.33	0.42	up
chr12:56192058:56192153:+@chr12:56192286:56192403:+	MARS,MIR6758	0.1	0.09	0.11	0.12	0.52	0.16	0.1	0.266667	0.11	0.52	0.09	0.12	up
chr12:56197756:56197803:-@chr12:56197319:56197488:-	DDIT3	0.26	0.43	0.43	0.6	0.62	0.78	0.373333	0.666667	0.43	0.78	0.26	0.6	up
chr12:56197756:56200612:-@chr12:56197488|56197509:56197319:-	MIR616,DDIT3	0.29	0.35	0.25	0.38	0.43	0.59	0.296667	0.466667	0.35	0.59	0.25	0.38	up
chr12:56467090:56467212:+@chr12:56472015:56472077:+@chr12:56473036:56473453:+	TSFM	0.13	0.15	0.06	0.24	0.5	0.16	0.113333	0.3	0.15	0.5	0.06	0.16	up
chr12:6560600:6560471|6560465:-@chr12:6558272:6558344:-	CHD4	0.08	0.06	0.13	0.26	0.16	0.27	0.09	0.23	0.13	0.27	0.06	0.16	up
chr12:7977010:7976854|7976850:-@chr12:7974376:7975348:-	SLC2A3	0.81	0.87	0.91	0.98	0.96	0.99	0.863333	0.976667	0.91	0.99	0.81	0.96	up
chr12:88443028:88443495:-@chr12:88414947:88415250:-@chr12:88409844:88410023:-	GALNT4,POC1B-GALNT4,POC1B	0.65	0.68	0.67	0.71	0.83	0.79	0.666667	0.776667	0.68	0.83	0.65	0.71	up
chr12:93976213:93976396:-@chr12:93975638:93975785:-	NR2C1	0.47	0.5	0.49	0.76	0.67	0.61	0.486667	0.68	0.5	0.76	0.47	0.61	up
chr13:75108426:75108863:+@chr13:75185319:75185389:+@chr13:75199166:75199235:+	LMO7	0.72	0.74	0.69	0.81	0.78	0.92	0.716667	0.836667	0.74	0.92	0.69	0.78	up
chr14:103025487:103028124:+@chr14:103034592:103034618:+@chr14:103036246:103036290:+	MARK3	0.26	0.26	0.26	0.51	0.37	0.5	0.26	0.46	0.26	0.51	0.26	0.37	up
chr14:103451156:103451279:-@chr14:103450569:103450723:-@chr14:103448601:103450074:-	C14orf2	0.22	0.22	0.13	0.24	0.36	0.36	0.19	0.32	0.22	0.36	0.13	0.24	up
chr14:105016507:105016601:+@chr14:105016818:105016875:+@chr14:105016968:105017551:+	CRIP2	0.81	0.75	0.86	0.95	0.88	0.96	0.806667	0.93	0.86	0.96	0.75	0.88	up
chr14:19911010:19911146:-@chr14:19910732:19910856:-@chr14:19909488:19909631:-	TEP1	0.48	0.53	0.63	0.72	0.74	0.74	0.546667	0.733333	0.63	0.74	0.48	0.72	up
chr14:20801666:20801828:-@chr14:20801310:20801335:-	HNRNPC	0.64	0.68	0.56	0.72	0.76	0.74	0.626667	0.74	0.68	0.76	0.56	0.72	up
chr14:20801828:20801666|20801619:-@chr14:20800903:20801335:-	HNRNPC	0.43	0.35	0.22	0.61	0.56	0.84	0.333333	0.67	0.43	0.84	0.22	0.56	up
chr14:22608525:22608666:-@chr14:22606363:22607720:-@chr14:22605015:22605057:-	ACIN1	0.35	0.42	0.36	0.48	0.65	0.47	0.376667	0.533333	0.42	0.65	0.35	0.47	up
chr14:23102429:23102687:-@chr14:23101553:23102331:-	AP1G2	0.6	0.72	0.68	0.87	0.78	0.8	0.666667	0.816667	0.72	0.87	0.6	0.78	up
chr14:23653193:23653973:+@chr14:23654255:23654342:+@chr14:23654431:23654798:+	DCAF11	0.6	0.54	0.61	0.62	0.7	0.75	0.583333	0.69	0.61	0.75	0.54	0.62	up
chr14:23981306:23981155|23981144:-@chr14:23978812:23979972:-	SDR39U1	0.45	0.41	0.28	0.49	0.49	0.49	0.38	0.49	0.45	0.49	0.28	0.49	up
chr14:49650753:49650872:-@chr14:49649083:49649187:-@chr14:49645092:49646181:-	VCPKMT	0.52	0.63	0.6	0.7	0.77	0.71	0.583333	0.726667	0.63	0.77	0.52	0.7	up
chr14:64047720:64047855:+@chr14:64053071:64053222:+@chr14:64057958:64063628:+	ZBTB1	0.28	0.16	0.34	0.39	0.42	0.48	0.26	0.43	0.34	0.48	0.16	0.39	up
chr14:74251328:74251399:+@chr14:74252277|74252407:74252555:+	FCF1	0.04	0.04	0.03	0.12	0.35	0.09	0.0366667	0.186667	0.04	0.35	0.03	0.09	up
chr14:74600017:74599926|74599922:-@chr14:74589677:74590115:-	ACYP1	0.17	0.11	0.11	0.32	0.32	0.2	0.13	0.28	0.17	0.32	0.11	0.2	up
chr14:75709642:75709721:+@chr14:75712719:75712786:+	GPATCH2L	0.33	0.51	0.45	0.55	0.61	0.59	0.43	0.583333	0.51	0.61	0.33	0.55	up
chr15:100330946:100331078:+@chr15:100331318:100331453:+		0.37	0.39	0.38	0.52	0.52	0.47	0.38	0.503333	0.39	0.52	0.37	0.47	up
chr15:20863602:20863749:-@chr15:20863083:20863279:-		0.6	0.71	0.7	0.79	0.86	0.75	0.67	0.8	0.71	0.86	0.6	0.75	up
chr15:35180385:35180863:-@chr15:35178948:35179092:-@chr15:35177456:35177692:-	MEIS2	0.64	0.61	0.64	0.81	0.75	0.69	0.63	0.75	0.64	0.81	0.61	0.69	up
chr15:47219017:47219142:-@chr15:47216926|47216947:47216837:-	COPS2	0.19	0.41	0.34	0.42	0.48	0.42	0.313333	0.44	0.41	0.48	0.19	0.42	up
chr15:50425850:50425950:-@chr15:50422606:50422686:-@chr15:50419685:50419883:-	MYO5A	0.43	0.44	0.4	0.55	0.59	0.48	0.423333	0.54	0.44	0.59	0.4	0.48	up
chr15:56889721:56889879|56889777:+@chr15:56901208:56901314:+	FAM63B	0.73	0.64	0.78	0.81	0.8	0.87	0.716667	0.826667	0.78	0.87	0.64	0.8	up
chr15:58706729:58707024:-@chr15:58694385:58694518:-@chr15:58607564:58611342:-	RORA	0.48	0.43	0.32	0.49	0.56	0.6	0.41	0.55	0.48	0.6	0.32	0.49	up
chr15:63055946:63055866|63055862:-@chr15:63053993:63054138:-	SPG21	0.11	0.12	0.04	0.25	0.22	0.16	0.09	0.21	0.12	0.25	0.04	0.16	up
chr15:72670545:72671208:+@chr15:72672529|72672532:72672630:+	ARID3B	0.11	0.12	0.13	0.45	0.45	0.29	0.12	0.396667	0.13	0.45	0.11	0.29	up
chr15:72804835:72805004:-@chr15:72802517|72802520:72801667:-	CYP1A1	0.39	0.45	0.59	0.62	0.64	0.74	0.476667	0.666667	0.59	0.74	0.39	0.62	up
chr15:73428278:73428733:+@chr15:73430695:73430770:+@chr15:73431426:73431570:+	NEIL1	0.17	0.16	0.13	0.24	0.54	0.3	0.153333	0.36	0.17	0.54	0.13	0.24	up
chr15:73440440:73440585:-@chr15:73439484:73439605:-	MAN2C1,MIR631	0.56	0.6	0.59	0.67	0.76	0.83	0.583333	0.753333	0.6	0.83	0.56	0.67	up
chr15:75770117:75770298:-@chr15:75756486:75756571:-@chr15:75692420:75695297:-	LINGO1	0.3	0.36	0.2	0.6	0.57	0.65	0.286667	0.606667	0.36	0.65	0.2	0.57	up
chr15:82990208:82990583:-@chr15:82989706:82990071:-	WDR73	0.48	0.44	0.5	0.51	0.68	0.66	0.473333	0.616667	0.5	0.68	0.44	0.51	up
chr15:86888846:86888929:-@chr15:86888048:86888153:-@chr15:86874858:86875950:-	DET1	0.18	0.17	0.11	0.26	0.34	0.27	0.153333	0.29	0.18	0.34	0.11	0.26	up
chr16:16324514:16324647:+@chr16:16325110:16325165:+@chr16:16325742:16325885:+	NPIPA3,NPIPA2,NPIPA5,NPIPA7,NPIPA8,LOC102724993	0.08	0.05	0.03	0.17	0.17	0.13	0.0533333	0.156667	0.08	0.17	0.03	0.13	up
chr16:16335005:16335242:+@chr16:16337219:16337350:+@chr16:16337410:16337495:+@chr16:16341664:16341792:+	NPIPA3,NPIPA2,NPIPA5,NPIPA7,NPIPA8,LOC102724993	0.31	0.25	0.34	0.41	0.46	0.36	0.3	0.41	0.34	0.46	0.25	0.36	up
chr16:16335005:16335242:+@chr16:16337219|16337410:16337495:+	NPIPA3,NPIPA2,NPIPA5,NPIPA7,NPIPA8,LOC102724993	0.25	0.2	0.25	0.38	0.46	0.32	0.233333	0.386667	0.25	0.46	0.2	0.32	up
chr16:1776539:1776657:+@chr16:1777679:1777833:+	NUBP2	0.19	0.25	0.29	0.34	0.65	0.3	0.243333	0.43	0.29	0.65	0.19	0.3	up
chr16:1816944:1817867:+@chr16:1828018:1828136:+@chr16:1829264:1830485:+	FAHD1	0.15	0.28	0.21	0.34	0.47	0.3	0.213333	0.37	0.28	0.47	0.15	0.3	up
chr16:219279:219478:-@chr16:217336|218402:217242:-	LUC7L	0.08	0.15	0.13	0.2	0.3	0.17	0.12	0.223333	0.15	0.3	0.08	0.17	up
chr16:2196360:2196411:+@chr16:2196499:2196661:+	MLST8	0.35	0.23	0.15	0.43	0.36	0.37	0.243333	0.386667	0.35	0.43	0.15	0.36	up
chr16:2223440:2223653|2223649:+@chr16:2223887:2223992:+	E4F1	0.17	0.29	0.2	0.57	0.5	0.58	0.22	0.55	0.29	0.58	0.17	0.5	up
chr16:24860809:24860965:-@chr16:24858186:24858419:-@chr16:24854292:24854461:-	ARHGAP17	0.27	0.34	0.26	0.62	0.35	0.39	0.29	0.453333	0.34	0.62	0.26	0.35	up
chr16:2758359:2760467:+@chr16:2760609|2760612:2760719:+	SRRM2	0.62	0.5	0.54	0.68	0.71	0.69	0.553333	0.693333	0.62	0.71	0.5	0.68	up
chr16:29931027:29932045:-@chr16:29929721:29929811:-@chr16:29928783:29929057:-	DOC2A	0.38	0.39	0.35	0.66	0.62	0.54	0.373333	0.606667	0.39	0.66	0.35	0.54	up
chr16:3013849:3014288:-@chr16:3013363|3013532:3013235:-	HCFC1R1	0.31	0.41	0.34	0.71	0.46	0.51	0.353333	0.56	0.41	0.71	0.31	0.46	up
chr16:3013849:3014288:-@chr16:3013414|3013532:3013235:-	HCFC1R1	0.39	0.47	0.38	0.48	0.53	0.57	0.413333	0.526667	0.47	0.57	0.38	0.48	up
chr16:30675189:30675342:+@chr16:30675412:30675537:+	PHKG2	0.33	0.3	0.41	0.58	0.7	0.52	0.346667	0.6	0.41	0.7	0.3	0.52	up
chr16:31103761:31104033|31104001:+@chr16:31107147:31107179:+	FUS	0.47	0.6	0.46	0.74	0.73	0.68	0.51	0.716667	0.6	0.74	0.46	0.68	up
chr16:400938:401077:+@chr16:401362:401579:+@chr16:401891:402489:+	DECR2	0.8	0.78	0.84	0.92	0.85	0.96	0.806667	0.91	0.84	0.96	0.78	0.85	up
chr16:400973:401579|401077:+@chr16:401891:402489:+	DECR2	0.68	0.68	0.59	0.83	0.8	0.88	0.65	0.836667	0.68	0.88	0.59	0.8	up
chr16:4459506:4459700:-@chr16:4456529:4456687:-@chr16:4456155:4456404:-	NMRAL1	0.06	0.06	0.05	0.39	0.2	0.09	0.0566667	0.226667	0.06	0.39	0.05	0.09	up
chr16:55528879:55530772:+@chr16:55531308:55531368:+@chr16:55531590:55531658:+@chr16:55533545:55533650:+	HERPUD1	0.17	0.47	0.39	0.64	0.51	0.59	0.343333	0.58	0.47	0.64	0.17	0.51	up
chr16:56241660:56241764:+@chr16:56242598|56242613:56243035:+	ADGRG1	0.08	0.09	0.08	0.18	0.41	0.1	0.0833333	0.23	0.09	0.41	0.08	0.1	up
chr16:57100559:57100594:+@chr16:57100706:57100757:+@chr16:57102827:57105026:+	NDRG4	0.52	0.66	0.86	0.92	0.91	0.88	0.68	0.903333	0.86	0.92	0.52	0.88	up
chr16:57108213:57108333:+@chr16:57109425|57109456:57109636:+	SETD6	0.22	0.11	0.24	0.36	0.41	0.27	0.19	0.346667	0.24	0.41	0.11	0.27	up
chr16:645774:645890|645886:+@chr16:646303:646538:+	WDR90,MSLN	0.78	0.62	0.77	0.89	0.8	0.79	0.723333	0.826667	0.78	0.89	0.62	0.79	up
chr16:65765566:65765744:+@chr16:65766025:65766348:+	NOL3	0.62	0.61	0.6	0.67	0.81	0.77	0.61	0.75	0.62	0.81	0.6	0.67	up
chr16:65773101:65773010|65772994:-@chr16:65771445:65772070:-	KIAA0895L	0.33	0.36	0.2	0.42	0.58	0.46	0.296667	0.486667	0.36	0.58	0.2	0.42	up
chr16:65819899:65820061|65820039:+@chr16:65820201:65820682:+	TMEM208	0.47	0.22	0.27	0.58	0.57	0.5	0.32	0.55	0.47	0.58	0.22	0.5	up
chr16:65878404:65878585|65878581:+@chr16:65879302:65879418:+	PLEKHG4	0.13	0.17	0.06	0.22	0.27	0.18	0.12	0.223333	0.17	0.27	0.06	0.18	up
chr16:66943484:66943813:+@chr16:66944799|66944896:66944970:+	PRMT7	0.19	0.49	0.49	0.6	0.71	0.56	0.39	0.623333	0.49	0.71	0.19	0.56	up
chr16:83050713:83051908:+@chr16:83052501:83052707:+@chr16:83052821:83053434:+	ATP2C2	0.13	0.13	0.1	0.41	0.35	0.26	0.12	0.34	0.13	0.41	0.1	0.26	up
chr16:84204323:84204505:+@chr16:84225021:84225239:+@chr16:84239659:84239858:+	GSE1	0.49	0.51	0.49	0.67	0.58	0.67	0.496667	0.64	0.51	0.67	0.49	0.58	up
chr16:88541835:88542723:+@chr16:88543329:88543422:+@chr16:88548152:88548285:+	DEF8	0.78	0.73	0.74	0.85	0.88	0.86	0.75	0.863333	0.78	0.88	0.73	0.85	up
chr16:88541835:88542723:+@chr16:88543329:88543547:+@chr16:88548152:88548285:+	DEF8	0.76	0.76	0.77	0.85	0.92	0.83	0.763333	0.866667	0.77	0.92	0.76	0.83	up
chr17:12839005:12839104:-@chr17:12838806:12838926:-	ELAC2	0.07	0.06	0.05	0.18	0.22	0.11	0.06	0.17	0.07	0.22	0.05	0.11	up
chr17:1398340:1398431:-@chr17:1393064:1393071:-@chr17:1387970:1388996:-	PITPNA	0.32	0.49	0.37	0.69	0.52	0.8	0.393333	0.67	0.49	0.8	0.32	0.52	up
chr17:16306297:16306425:-@chr17:16291884:16291999:-@chr17:16285405:16288170:-	LRRC75A	0.12	0.06	0.11	0.29	0.14	0.24	0.0966667	0.223333	0.12	0.29	0.06	0.14	up
chr17:17115047:17114935|17114797:-@chr17:17111924:17112016:-	COPS3	0.39	0.32	0.5	0.78	0.59	0.52	0.403333	0.63	0.5	0.78	0.32	0.52	up
chr17:17943056:17943116:+@chr17:17943672:17944474:+	DRG2	0.43	0.31	0.38	0.69	0.45	0.51	0.373333	0.55	0.43	0.69	0.31	0.45	up
chr17:17943056:17943132:+@chr17:17943672:17944474:+	DRG2	0.54	0.4	0.42	0.84	0.64	0.65	0.453333	0.71	0.54	0.84	0.4	0.64	up
chr17:22901721:22901861:+@chr17:22928645:22928792:+@chr17:22933799:22934260:+	KSR1	0.87	0.75	0.85	0.95	0.93	0.97	0.823333	0.95	0.87	0.97	0.75	0.93	up
chr17:23965232:23965338:-@chr17:23964585:23964833:-@chr17:23955203:23956360:-	SGK494	0.22	0.34	0.34	0.38	0.64	0.43	0.3	0.483333	0.34	0.64	0.22	0.38	up
chr17:24437582:24437944:-@chr17:24436748:24436792:-@chr17:24433460:24433582:-	TIAF1,MYO18A	0.08	0.12	0.11	0.18	0.42	0.14	0.103333	0.246667	0.12	0.42	0.08	0.14	up
chr17:35067752:35067805:+@chr17:35068184:35068301:+	STARD3	0.3	0.17	0.2	0.42	0.5	0.32	0.223333	0.413333	0.3	0.5	0.17	0.32	up
chr17:3529633:3529827:-@chr17:3526222:3526369:-@chr17:3523269:3523920:-	P2RX5,P2RX5-TAX1BP3	0.06	0.06	0.04	0.22	0.13	0.14	0.0533333	0.163333	0.06	0.22	0.04	0.13	up
chr17:35587274:35588159:+@chr17:35591077:35591151:+@chr17:35591394:35591472:+	RAPGEFL1	0.28	0.23	0.16	0.49	0.37	0.5	0.223333	0.453333	0.28	0.5	0.16	0.37	up
chr17:37524980:37524789|37524598:-@chr17:37523841:37523947:-	KAT2A	0.09	0.16	0.16	0.29	0.28	0.26	0.136667	0.276667	0.16	0.29	0.09	0.26	up
chr17:39757605:39757743:-@chr17:39756484|39756584:39756372:-	SLC25A39	0.05	0.21	0.2	0.39	0.39	0.25	0.153333	0.343333	0.21	0.39	0.05	0.25	up
chr17:39757605:39757743:-@chr17:39756484|39756613:39756372:-	SLC25A39	0.12	0.19	0.21	0.49	0.26	0.22	0.173333	0.323333	0.21	0.49	0.12	0.22	up
chr17:41429602:41429867:+@chr17:41443513:41443605:+@chr17:41447446:41447527:+	STH,MAPT	0.13	0.15	0.12	0.22	0.75	0.29	0.133333	0.42	0.15	0.75	0.12	0.22	up
chr17:43539900:43540199:+@chr17:43543069:43543128:+@chr17:43544392:43545021:+	SNX11	0.13	0.18	0.14	0.28	0.43	0.34	0.15	0.35	0.18	0.43	0.13	0.28	up
chr17:44325770:44325817:+@chr17:44327517:44327695:+	ATP5G1	0.23	0.32	0.26	0.36	0.57	0.49	0.27	0.473333	0.32	0.57	0.23	0.36	up
chr17:45811134:45811255:+@chr17:45811428|45811467:45811584:+	EME1	0.09	0.07	0.32	0.39	0.45	0.33	0.16	0.39	0.32	0.45	0.07	0.33	up
chr17:45892958:45893232:+@chr17:45893602:45893730:+@chr17:45893993:45894046:+	ACSF2	0.52	0.7	0.54	0.85	0.82	0.9	0.586667	0.856667	0.7	0.9	0.52	0.82	up
chr17:45981403:45981546:+@chr17:45981646:45981851:+@chr17:45982345:45982672:+	SPATA20	0.84	0.75	0.84	0.91	0.95	0.91	0.81	0.923333	0.84	0.95	0.75	0.91	up
chr17:5232846:5233004:-@chr17:5231964|5231996:5231823:-	NUP88	0.13	0.11	0.14	0.36	0.18	0.16	0.126667	0.233333	0.14	0.36	0.11	0.16	up
chr17:5266813:5266873:+@chr17:5270280:5270343:+@chr17:5272115:5276932:+	RPAIN	0.43	0.48	0.4	0.75	0.49	0.6	0.436667	0.613333	0.48	0.75	0.4	0.49	up
chr17:5325145:5325433:-@chr17:5324431:5324503:-@chr17:5324098:5324188:-	DERL2	0.31	0.33	0.08	0.34	0.55	0.57	0.24	0.486667	0.33	0.57	0.08	0.34	up
chr17:55508273:55508380:-@chr17:55507848:55507976:-@chr17:55506105:55506302:-@chr17:55505889:55506029:-	HEATR6	0.34	0.46	0.45	0.56	0.61	0.64	0.416667	0.603333	0.46	0.64	0.34	0.56	up
chr17:59257659:59257764:-@chr17:59257350:59257396:-	FTSJ3	0.21	0.1	0.19	0.3	0.45	0.24	0.166667	0.33	0.21	0.45	0.1	0.24	up
chr17:6468799:6468905:-@chr17:6467651:6468050:-@chr17:6467553:6467615:-@chr17:6466926:6467141:-	KIAA0753	0.08	0.15	0.15	0.18	0.27	0.24	0.126667	0.23	0.15	0.27	0.08	0.18	up
chr17:69954583:69954732:+@chr17:69956557:69956649:+@chr17:69957069:69959386:+	GPRC5C	0.54	0.36	0.27	0.56	0.61	0.55	0.39	0.573333	0.54	0.61	0.27	0.55	up
chr17:70280126:70280129:-@chr17:70279694:70280011:-	NAT9	0.56	0.47	0.56	0.72	0.79	0.87	0.53	0.793333	0.56	0.87	0.47	0.72	up
chr17:70280630:70280773:-@chr17:70279851|70280129:70279694:-	NAT9	0.61	0.68	0.73	0.86	0.75	0.77	0.673333	0.793333	0.73	0.86	0.61	0.75	up
chr17:70280630:70280773:-@chr17:70280011|70280129:70279694:-	NAT9	0.24	0.33	0.32	0.42	0.56	0.4	0.296667	0.46	0.33	0.56	0.24	0.4	up
chr17:7074771:7074840:-@chr17:7074328:7074473:-	DVL2	0.04	0.05	0.05	0.09	0.36	0.06	0.0466667	0.17	0.05	0.36	0.04	0.06	up
chr17:70777790:70778887:-@chr17:70777023:70777124:-@chr17:70775422:70775868:-	MIF4GD	0.24	0.29	0.26	0.38	0.41	0.32	0.263333	0.37	0.29	0.41	0.24	0.32	up
chr17:70777790:70778887:-@chr17:70777023:70777145:-@chr17:70775422:70775868:-	MIF4GD	0.3	0.36	0.34	0.5	0.41	0.44	0.333333	0.45	0.36	0.5	0.3	0.41	up
chr17:70797030:70797638:-@chr17:70796178:70796267:-@chr17:70796064:70796137:-@chr17:70794309:70794478:-	SLC25A19	0.28	0.21	0.24	0.31	0.41	0.43	0.243333	0.383333	0.28	0.43	0.21	0.31	up
chr17:7104769:7104685|7104681:-@chr17:7102740:7104579:-	CLDN7	0.1	0.03	0.03	0.17	0.39	0.13	0.0533333	0.23	0.1	0.39	0.03	0.13	up
chr17:71210155:71210246:+@chr17:71211483:71211534:+@chr17:71212431:71214446:+	SAP30BP	0.63	0.7	0.66	0.85	0.82	0.85	0.663333	0.84	0.7	0.85	0.63	0.82	up
chr17:7430734:7430880:+@chr17:7431203:7431313:+	MPDU1	0.17	0.26	0.14	0.3	0.39	0.47	0.19	0.386667	0.26	0.47	0.14	0.3	up
chr17:77260448:77260561:-@chr17:77259469:77259584:-	ARL16	0.16	0.34	0.26	0.44	0.45	0.38	0.253333	0.423333	0.34	0.45	0.16	0.38	up
chr17:77260448:77261168:-@chr17:77259584|77260110:77259469:-	ARL16	0.6	0.75	0.77	0.83	0.83	0.78	0.706667	0.813333	0.77	0.83	0.6	0.78	up
chr17:77260448:77261168:-@chr17:77259878:77260110:-@chr17:77259469:77259584:-	ARL16	0.45	0.6	0.64	0.69	0.71	0.66	0.563333	0.686667	0.64	0.71	0.45	0.66	up
chr17:7737848:7737978:+@chr17:7738158|7738170:7738308:+	CHD3	0.37	0.33	0.34	0.54	0.52	0.5	0.346667	0.52	0.37	0.54	0.33	0.5	up
chr17:77487360:77487290|77487286:-@chr17:77486504:77486680:-	PYCR1	0.36	0.39	0.31	0.52	0.44	0.58	0.353333	0.513333	0.39	0.58	0.31	0.44	up
chr17:77571023:77571074:-@chr17:77570458:77570481:-	CENPX	0.42	0.45	0.39	0.63	0.62	0.69	0.42	0.646667	0.45	0.69	0.39	0.62	up
chr17:8051410:8051219|8050783:-@chr17:8050534:8050682:-	AURKB	0.43	0.53	0.5	0.6	0.68	0.76	0.486667	0.68	0.53	0.76	0.43	0.6	up
chr17:8051410:8051219|8050793:-@chr17:8050534:8050682:-	AURKB	0.54	0.59	0.57	0.68	0.71	0.82	0.566667	0.736667	0.59	0.82	0.54	0.68	up
chr17:8287970:8288400:+@chr17:8288667:8288785:+@chr17:8288997:8289083:+@chr17:8289754:8290088:+	NDEL1	0.2	0.2	0.13	0.45	0.4	0.21	0.176667	0.353333	0.2	0.45	0.13	0.21	up
chr18:11895952:11895911|11895737:-@chr18:11886983:11887355:-	MPPE1	0.25	0.25	0.16	0.28	0.43	0.26	0.22	0.323333	0.25	0.43	0.16	0.26	up
chr18:19297929:19298074:+@chr18:19298168:19298275:+	RIOK3	0.09	0.09	0.06	0.2	0.28	0.1	0.08	0.193333	0.09	0.28	0.06	0.1	up
chr18:19310968:19311230:+@chr18:19313279|19313288:19313386:+	RIOK3	0.75	0.84	0.78	0.9	0.86	0.94	0.79	0.9	0.84	0.94	0.75	0.86	up
chr18:32632410:32632570:-@chr18:32615760:32615883:-@chr18:32611152:32614149:-	TPGS2	0.39	0.4	0.49	0.6	0.68	0.54	0.426667	0.606667	0.49	0.68	0.39	0.54	up
chr18:52469246:52469854:-@chr18:52465678:52465764:-@chr18:52456572:52457268:-	TXNL1	0.22	0.25	0.15	0.35	0.32	0.28	0.206667	0.316667	0.25	0.35	0.15	0.28	up
chr18:72857776:72858233:-@chr18:72829821:72829856:-@chr18:72819771:72821415:-	MBP	0.34	0.25	0.2	0.39	0.61	0.38	0.263333	0.46	0.34	0.61	0.2	0.38	up
chr18:72857776:72858233:-@chr18:72829821:72829856:-@chr18:72829439:72829464:-@chr18:72819771:72821415:-	MBP	0.43	0.46	0.43	0.62	0.54	0.57	0.44	0.576667	0.46	0.62	0.43	0.54	up
chr18:72857776:72858233:-@chr18:72830896:72831004:-@chr18:72825719:72829856:-	MBP	0.31	0.31	0.21	0.69	0.45	0.34	0.276667	0.493333	0.31	0.69	0.21	0.34	up
chr18:72857776:72858233:-@chr18:72830900:72830984:-@chr18:72825719:72829856:-	MBP	0.39	0.32	0.24	0.45	0.49	0.55	0.316667	0.496667	0.39	0.55	0.24	0.45	up
chr18:72857776:72858233:-@chr18:72830956|72830984:72830900:-	MBP	0.08	0.07	0.03	0.31	0.35	0.1	0.06	0.253333	0.08	0.35	0.03	0.1	up
chr18:72857776:72858233:-@chr18:72830956|72831004:72830900:-	MBP	0.04	0.04	0.02	0.23	0.18	0.07	0.0333333	0.16	0.04	0.23	0.02	0.07	up
chr18:72857776:72858233:-@chr18:72831771:72831858:-@chr18:72830662:72831004:-	MBP	0.05	0.06	0.02	0.11	0.26	0.07	0.0433333	0.146667	0.06	0.26	0.02	0.07	up
chr18:72857776:72858233:-@chr18:72850793:72850870:-@chr18:72830662:72831004:-	MBP	0.07	0.06	0.04	0.2	0.28	0.08	0.0566667	0.186667	0.07	0.28	0.04	0.08	up
chr18:75208758:75208913:+@chr18:75209120:75209184:+@chr18:75220342:75225359:+	ATP9B	0.62	0.47	0.48	0.78	0.78	0.77	0.523333	0.776667	0.62	0.78	0.47	0.77	up
chr19:10325718:10325910:-@chr19:10325204:10325322:-@chr19:10324598:10324774:-	TYK2	0.64	0.63	0.73	0.91	0.81	0.9	0.666667	0.873333	0.73	0.91	0.63	0.81	up
chr19:1046258:1046598:-@chr19:1044755:1044902:-@chr19:1042500:1042906:-	POLR2E	0.14	0.08	0.06	0.39	0.33	0.24	0.0933333	0.32	0.14	0.39	0.06	0.24	up
chr19:10537393:10537466:-@chr19:10536605:10536710:-	KRI1	0.14	0.07	0.24	0.42	0.54	0.28	0.15	0.413333	0.24	0.54	0.07	0.28	up
chr19:11484871:11485099:-@chr19:11482432:11482475:-@chr19:11479517:11479863:-	ECSIT	0.04	0.03	0.04	0.18	0.16	0.09	0.0366667	0.143333	0.04	0.18	0.03	0.09	up
chr19:11710632:11710823:-@chr19:11696009:11696069:-@chr19:11693078:11695157:-	ZNF823	0.71	0.77	0.68	0.81	0.84	0.85	0.72	0.833333	0.77	0.85	0.68	0.81	up
chr19:12852966:12852786|12852616:-@chr19:12850484:12850648:-	DNASE2	0.65	0.53	0.62	0.72	0.89	0.79	0.6	0.8	0.65	0.89	0.53	0.72	up
chr19:13088245:13087960|13087920:-@chr19:13087093:13087280:-	TRMT1	0.11	0.14	0.15	0.39	0.3	0.16	0.133333	0.283333	0.15	0.39	0.11	0.16	up
chr19:13088245:13087960|13087920:-@chr19:13087431:13087582:-	TRMT1	0.11	0.12	0.12	0.34	0.21	0.22	0.116667	0.256667	0.12	0.34	0.11	0.21	up
chr19:13737768:13737943|13737879:+@chr19:13740173:13740551:+	MRI1	0.64	0.54	0.61	0.66	0.75	0.71	0.596667	0.706667	0.64	0.75	0.54	0.66	up
chr19:14381348:14381457:-@chr19:14381115:14381259:-	DDX39A	0.09	0.07	0.11	0.2	0.32	0.13	0.09	0.216667	0.11	0.32	0.07	0.13	up
chr19:1566284:1566820:-@chr19:1563206:1563432:-@chr19:1560289:1562848:-	TCF3	0.51	0.47	0.47	0.53	0.63	0.6	0.483333	0.586667	0.51	0.63	0.47	0.53	up
chr19:16356940:16357022:-@chr19:16333590:16333795:-@chr19:16327059:16327662:-	EPS15L1	0.35	0.41	0.35	0.49	0.64	0.43	0.37	0.52	0.41	0.64	0.35	0.43	up
chr19:16834163:16834370:+@chr19:16834695:16834790:+@chr19:16835491:16835607:+	SIN3B	0.12	0.24	0.16	0.34	0.46	0.26	0.173333	0.353333	0.24	0.46	0.12	0.26	up
chr19:17239159:17239336:+@chr19:17240449|17240565:17240900:+	BABAM1	0.09	0.13	0.15	0.32	0.26	0.26	0.123333	0.28	0.15	0.32	0.09	0.26	up
chr19:17310763:17310835:+@chr19:17310932:17311075:+	GTPBP3	0.25	0.37	0.34	0.41	0.61	0.66	0.32	0.56	0.37	0.66	0.25	0.41	up
chr19:18536679:18536831:+@chr19:18536944:18537000:+@chr19:18538942:18539082:+	KXD1	0.05	0.1	0.05	0.34	0.16	0.13	0.0666667	0.21	0.1	0.34	0.05	0.13	up
chr19:18966175:18967089:-@chr19:18965457:18965549:-@chr19:18962697:18962958:-	SUGP2	0.57	0.5	0.6	0.64	0.71	0.74	0.556667	0.696667	0.6	0.74	0.5	0.64	up
chr19:19599901:19601191:-@chr19:19599563:19599778:-@chr19:19598853:19599313:-	LPAR2	0.3	0.18	0.19	0.38	0.47	0.37	0.223333	0.406667	0.3	0.47	0.18	0.37	up
chr19:19600237:19600739:-@chr19:19599206:19599313:-@chr19:19598352:19599093:-	LPAR2	0.17	0.31	0.27	0.56	0.45	0.5	0.25	0.503333	0.31	0.56	0.17	0.45	up
chr19:40441688:40441807:+@chr19:40444668:40444724:+@chr19:40445239:40445435:+@chr19:40449102:40449275:+	LSR	0.35	0.4	0.35	0.55	0.52	0.51	0.366667	0.526667	0.4	0.55	0.35	0.51	up
chr19:40441688:40441807:+@chr19:40445239:40445435:+@chr19:40449102:40449275:+	LSR	0.17	0.18	0.17	0.31	0.29	0.23	0.173333	0.276667	0.18	0.31	0.17	0.23	up
chr19:40441688:40441807:+@chr19:40445289:40445435:+@chr19:40449102:40449275:+	LSR	0.37	0.39	0.38	0.7	0.52	0.45	0.38	0.556667	0.39	0.7	0.37	0.45	up
chr19:40441688:40441807:+@chr19:40445289:40445439:+@chr19:40449102:40449275:+	LSR	0.26	0.25	0.26	0.57	0.4	0.32	0.256667	0.43	0.26	0.57	0.25	0.32	up
chr19:41408696:41408863|41408815:+@chr19:41411490:41412441:+	ZNF146	0.28	0.3	0.2	0.46	0.35	0.6	0.26	0.47	0.3	0.6	0.2	0.35	up
chr19:44075894:44077642:-@chr19:44074274:44074446:-@chr19:44073045:44073142:-@chr19:44071567:44072624:-	SIRT2	0.24	0.33	0.13	0.35	0.48	0.36	0.233333	0.396667	0.33	0.48	0.13	0.35	up
chr19:44618188:44618085|44618066:-@chr19:44616002:44616241:-	RPS16	0.53	0.52	0.5	0.68	0.66	0.61	0.516667	0.65	0.53	0.68	0.5	0.61	up
chr19:47566637:47566823:+@chr19:47567342:47567474:+@chr19:47571499:47574761:+	MEGF8	0.82	0.69	0.64	0.92	0.85	0.88	0.716667	0.883333	0.82	0.92	0.64	0.85	up
chr19:49223015:49223141:+@chr19:49223390:49223482:+@chr19:49227810:49229103:+	ZNF222	0.49	0.69	0.7	0.8	0.79	0.9	0.626667	0.83	0.7	0.9	0.49	0.79	up
chr19:51011896:51012231:-@chr19:51011675|51011712:51011580:-	SYMPK	0.15	0.1	0.11	0.6	0.18	0.22	0.12	0.333333	0.15	0.6	0.1	0.18	up
chr19:51058156:51058388:-@chr19:51049605|51049683:51049489:-	SYMPK	0.09	0.15	0.14	0.25	0.32	0.17	0.126667	0.246667	0.15	0.32	0.09	0.17	up
chr19:54296459:54296540:+@chr19:54297183:54297242:+@chr19:54299703:54299804:+	SNRNP70	0.06	0.07	0.06	0.26	0.18	0.13	0.0633333	0.19	0.07	0.26	0.06	0.13	up
chr19:54296459:54296540:+@chr19:54297183:54298656:+@chr19:54299703:54299804:+	SNRNP70	0.17	0.28	0.29	0.54	0.39	0.36	0.246667	0.43	0.29	0.54	0.17	0.36	up
chr19:56196166:56196243:-@chr19:56195492:56195651:-@chr19:56195064:56195326:-	KLK8,KLK9	0.09	0.11	0.12	0.67	0.2	0.21	0.106667	0.36	0.12	0.67	0.09	0.2	up
chr19:56196166:56196243:-@chr19:56195492:56195786:-@chr19:56195064:56195326:-	KLK8,KLK9	0.11	0.08	0.09	0.63	0.17	0.17	0.0933333	0.323333	0.11	0.63	0.08	0.17	up
chr19:5865951:5866161|5866076:+@chr19:5866232:5868243:+	CAPS	0.26	0.23	0.14	0.45	0.3	0.47	0.21	0.406667	0.26	0.47	0.14	0.3	up
chr19:59397167:59397321|59397293:+@chr19:59401956:59403331:+	RPS9	0.18	0.38	0.18	0.43	0.66	0.53	0.246667	0.54	0.38	0.66	0.18	0.43	up
chr1:101132777:101134147:-@chr1:101126972|101127008:101126897:-	EXTL2	0.35	0.28	0.36	0.49	0.53	0.43	0.33	0.483333	0.36	0.53	0.28	0.43	up
chr1:10413373:10414045:+@chr1:10417301:10417334:+@chr1:10422991:10423057:+	APITD1-CORT,CENPS	0.2	0.08	0.13	0.47	0.29	0.43	0.136667	0.396667	0.2	0.47	0.08	0.29	up
chr1:11004768:11004894|11004885:+@chr1:11005837:11006827:+	TARDBP	0.21	0.12	0.12	0.36	0.28	0.31	0.15	0.316667	0.21	0.36	0.12	0.28	up
chr1:120640935:120641388:+@chr1:120641493:120641508:+@chr1:120643498:120643575:+	FAM72B	0.47	0.29	0.36	0.76	0.57	0.5	0.373333	0.61	0.47	0.76	0.29	0.5	up
chr1:143304915:143305322:+@chr1:143307192|143307211:143307309:+		0.65	0.54	0.68	0.85	0.7	0.73	0.623333	0.76	0.68	0.85	0.54	0.7	up
chr1:149294951:149295093:-@chr1:149294116:149294226:-	CDC42SE1	0.8	0.68	0.76	0.89	0.89	0.92	0.746667	0.9	0.8	0.92	0.68	0.89	up
chr1:149505104:149505221|149505212:+@chr1:149505408:149505918:+	PSMD4	0.13	0.06	0.18	0.19	0.36	0.26	0.123333	0.27	0.18	0.36	0.06	0.19	up
chr1:151784618:151784580|151784570:-@chr1:151783754:151783909:-	S100A4	0.46	0.48	0.52	0.63	0.75	0.8	0.486667	0.726667	0.52	0.8	0.46	0.63	up
chr1:151875672:151877548:+@chr1:151881343|151881346:151881529:+	CHTOP	0.49	0.57	0.53	0.76	0.65	0.61	0.53	0.673333	0.57	0.76	0.49	0.61	up
chr1:152459442:152459898:-@chr1:152452993:152453046:-@chr1:152451558:152451724:-	C1orf43	0.71	0.67	0.65	0.76	0.82	0.83	0.676667	0.803333	0.71	0.83	0.65	0.76	up
chr1:153495241:153495369:-@chr1:153493713:153493801:-@chr1:153492396:153493206:-	SCAMP3	0.22	0.2	0.24	0.48	0.41	0.45	0.22	0.446667	0.24	0.48	0.2	0.41	up
chr1:153554584:153554792|153554706:+@chr1:153555080:153555463:+	FDPS	0.13	0.09	0.19	0.54	0.21	0.25	0.136667	0.333333	0.19	0.54	0.09	0.21	up
chr1:153560350:153560959:+@chr1:153561106:153561224:+@chr1:153561260:153561358:+@chr1:153561517:153562420:+	RUSC1	0.3	0.25	0.34	0.37	0.55	0.36	0.296667	0.426667	0.34	0.55	0.25	0.36	up
chr1:154651070:154654904:-@chr1:154649829:154649913:-@chr1:154643786:154644391:-	C1orf61	0.37	0.34	0.21	0.41	0.5	0.39	0.306667	0.433333	0.37	0.5	0.21	0.39	up
chr1:154964858:154965631:+@chr1:154968407|154968697:154968889:+	RRNAD1	0.69	0.78	0.73	0.83	0.89	0.85	0.733333	0.856667	0.78	0.89	0.69	0.83	up
chr1:155175964:155176326:-@chr1:155174834:155174875:-@chr1:155173665:155173912:-	ARHGEF11	0.02	0.05	0.02	0.24	0.36	0.24	0.03	0.28	0.05	0.36	0.02	0.24	up
chr1:155175964:155176326:-@chr1:155174834:155174929:-@chr1:155173665:155173912:-	ARHGEF11	0.09	0.12	0.03	0.59	0.53	0.56	0.08	0.56	0.12	0.59	0.03	0.53	up
chr1:155175964:155176326:-@chr1:155174875|155174929:155174834:-	ARHGEF11	0.34	0.2	0.11	0.86	0.39	0.81	0.216667	0.686667	0.34	0.86	0.11	0.39	up
chr1:158443544:158443651:+@chr1:158444878:158445079:+@chr1:158447957:158448130:+	PEA15	0.51	0.55	0.51	0.67	0.74	0.59	0.523333	0.666667	0.55	0.74	0.51	0.59	up
chr1:16807590:16807861:-@chr1:16794091|16794095:16794013:-	NBPF1	0.81	0.66	0.83	0.87	0.88	0.9	0.766667	0.883333	0.83	0.9	0.66	0.87	up
chr1:176261913:176262013:-@chr1:176258198:176258426:-@chr1:176241894:176243907:-	LOC730102	0.58	0.44	0.63	0.84	0.75	0.76	0.55	0.783333	0.63	0.84	0.44	0.75	up
chr1:181708016:181708407:+@chr1:181738011:181738149:+@chr1:181748595:181749114:+	SMG7	0.2	0.17	0.19	0.55	0.29	0.27	0.186667	0.37	0.2	0.55	0.17	0.27	up
chr1:181777834:181778260|181778122:+@chr1:181780111:181780295:+	SMG7	0.51	0.45	0.41	0.58	0.6	0.54	0.456667	0.573333	0.51	0.6	0.41	0.54	up
chr1:205579365:205579385:+@chr1:205587415:205587529:+@chr1:205590106:205590190:+@chr1:205599514:205601066:+	CD55	0.31	0.31	0.23	0.34	0.47	0.52	0.283333	0.443333	0.31	0.52	0.23	0.34	up
chr1:210069415:210070208:-@chr1:210069284|210069288:210069024:-	LPGAT1	0.46	0.52	0.49	0.53	0.53	0.79	0.49	0.616667	0.52	0.79	0.46	0.53	up
chr1:21201793:21201888:-@chr1:21200279:21200392:-@chr1:21180128:21180307:-	MIR1256,EIF4G3	0.16	0.11	0.15	0.34	0.3	0.19	0.14	0.276667	0.16	0.34	0.11	0.19	up
chr1:2329751:2330157:-@chr1:2328251|2328254:2328019:-	PEX10	0.25	0.25	0.18	0.34	0.4	0.34	0.226667	0.36	0.25	0.4	0.18	0.34	up
chr1:233644371:233644556:+@chr1:233649355:233649499:+@chr1:233657078:233657259:+	TBCE	0.68	0.63	0.58	0.7	0.77	0.78	0.63	0.75	0.68	0.78	0.58	0.7	up
chr1:244821437:244821866:+@chr1:244851354:244851559:+@chr1:244861819:244861849:+	LOC101928139,CNST	0.39	0.49	0.49	0.61	0.75	0.66	0.456667	0.673333	0.49	0.75	0.39	0.61	up
chr1:245553079:245553315:-@chr1:245552623:245552730:-@chr1:245540249:245540381:-	ZNF496	0.14	0.1	0.08	0.3	0.24	0.25	0.106667	0.263333	0.14	0.3	0.08	0.24	up
chr1:247118953:247119747:-@chr1:247118681|247118839:247118650:-	ZNF692	0.5	0.34	0.2	0.73	0.55	0.57	0.346667	0.616667	0.5	0.73	0.2	0.55	up
chr1:27505264:27506521:+@chr1:27507248:27507319:+	WDTC1	0.42	0.43	0.38	0.45	0.64	0.45	0.41	0.513333	0.43	0.64	0.38	0.45	up
chr1:32311090:32311239:+@chr1:32313131|32313139:32313265:+	TMEM39B	0.16	0.17	0.11	0.25	0.57	0.18	0.146667	0.333333	0.17	0.57	0.11	0.18	up
chr1:39982083:39982183:+@chr1:39983634:39987026:+@chr1:39987162:39987347:+	PPIE	0.25	0.32	0.3	0.42	0.43	0.39	0.29	0.413333	0.32	0.43	0.25	0.39	up
chr1:40086245:40086566:-@chr1:40085919|40086006:40085807:-	TRIT1	0.18	0.21	0.12	0.46	0.32	0.32	0.17	0.366667	0.21	0.46	0.12	0.32	up
chr1:44208855:44208985|44208969:+@chr1:44209225:44209794:+	DPH2	0.21	0.15	0.18	0.49	0.43	0.27	0.18	0.396667	0.21	0.49	0.15	0.27	up
chr1:45252168:45252329:+@chr1:45252995:45253095:+	UROD	0.28	0.27	0.23	0.41	0.32	0.52	0.26	0.416667	0.28	0.52	0.23	0.32	up
chr1:53513891:53514013:-@chr1:53510864:53510902:-@chr1:53509487:53509606:-	LRP8	0.57	0.62	0.61	0.84	0.88	0.66	0.6	0.793333	0.62	0.88	0.57	0.66	up
chr1:61644822:61644987:+@chr1:61677711:61677778:+@chr1:61693563:61696544:+	NFIA	0.13	0.15	0.08	0.48	0.29	0.21	0.12	0.326667	0.15	0.48	0.08	0.21	up
chr1:61932957:61933030:-@chr1:61925052:61925155:-@chr1:61919306:61921806:-	TM2D1	0.36	0.5	0.27	0.51	0.79	0.58	0.376667	0.626667	0.5	0.79	0.27	0.51	up
chr1:61939194:61939285:-@chr1:61925052:61925181:-@chr1:61919306:61921806:-	TM2D1	0.29	0.69	0.58	0.7	0.78	0.75	0.52	0.743333	0.69	0.78	0.29	0.7	up
chr1:63692177:63692233:-@chr1:63685060:63685115:-@chr1:63678624:63679362:-	ITGB3BP	0.54	0.39	0.66	0.76	0.76	0.75	0.53	0.756667	0.66	0.76	0.39	0.75	up
chr1:63746787:63746829:-@chr1:63695393:63696632:-@chr1:63693149:63693227:-	ITGB3BP	0.47	0.51	0.58	0.64	0.64	0.62	0.52	0.633333	0.58	0.64	0.47	0.62	up
chr1:6620942:6621011:-@chr1:6620094:6620151:-	DNAJC11	0.51	0.45	0.27	0.61	0.58	0.54	0.41	0.576667	0.51	0.61	0.27	0.54	up
chr1:70484556:70485178:+@chr1:70488202|70488223:70488318:+	SRSF11	0.08	0.12	0.14	0.19	0.52	0.16	0.113333	0.29	0.14	0.52	0.08	0.16	up
chr1:9723739:9723905:-@chr1:9720143:9720199:-@chr1:9718530:9718687:-	CLSTN1	0.19	0.2	0.25	0.52	0.42	0.5	0.213333	0.48	0.25	0.52	0.19	0.42	up
chr20:30848257:30848336:+@chr20:30848408|30848654:30848766:+	DNMT3B	0.17	0.19	0.22	0.6	0.3	0.23	0.193333	0.376667	0.22	0.6	0.17	0.23	up
chr20:3159378:3159491:-@chr20:3159161:3159293:-	SLC4A11	0.24	0.25	0.21	0.45	0.48	0.32	0.233333	0.416667	0.25	0.48	0.21	0.32	up
chr20:43425099:43425747:+@chr20:43427601|43427698:43427740:+	SYS1-DBNDD2,SYS1	0.26	0.23	0.16	0.38	0.49	0.36	0.216667	0.41	0.26	0.49	0.16	0.36	up
chr20:43874662:43875510:+@chr20:43876430:43876516:+@chr20:43877436:43877586:+	UBE2C	0.49	0.43	0.62	0.81	0.65	0.68	0.513333	0.713333	0.62	0.81	0.43	0.65	up
chr20:47330429:47330518|47330514:+@chr20:47330847:47339214:+	SNORD12,ZFAS1	0.15	0.15	0.15	0.3	0.37	0.17	0.15	0.28	0.15	0.37	0.15	0.17	up
chr20:60246937:60247048:+@chr20:60250772:60251112:+@chr20:60264508:60265215:+	OSBPL2	0.1	0.1	0.05	0.18	0.46	0.14	0.0833333	0.26	0.1	0.46	0.05	0.14	up
chr20:61638882:61639306:-@chr20:61636772:61636856:-@chr20:61635623:61636112:-	PTK6	0.36	0.49	0.4	0.67	0.62	0.86	0.416667	0.716667	0.49	0.86	0.36	0.62	up
chr20:61791547:61791662:+@chr20:61791884:61792007:+	TNFRSF6B,RTEL1,RTEL1-TNFRSF6B,RTEL1	0.16	0.21	0.24	0.43	0.32	0.27	0.203333	0.34	0.24	0.43	0.16	0.27	up
chr20:61835383:61835535:+@chr20:61836441:61836620:+	ZGPAT	0.48	0.33	0.47	0.84	0.72	0.51	0.426667	0.69	0.48	0.84	0.33	0.51	up
chr20:61835383:61835571:+@chr20:61836441:61836620:+	ZGPAT	0.54	0.38	0.52	0.85	0.71	0.56	0.48	0.706667	0.54	0.85	0.38	0.56	up
chr20:62047958:62048272:-@chr20:62047785|62047796:62047602:-	UCKL1,MIR1914	0.53	0.36	0.41	0.68	0.67	0.65	0.433333	0.666667	0.53	0.68	0.36	0.65	up
chr20:62131174:62131292|62131288:+@chr20:62133715:62133841:+	PRPF6	0.1	0.13	0.08	0.17	0.31	0.21	0.103333	0.23	0.13	0.31	0.08	0.17	up
chr21:29318809:29318969:+@chr21:29320759:29320895:+@chr21:29322065:29322166:+	USP16	0.06	0.06	0.07	0.12	0.44	0.08	0.0633333	0.213333	0.07	0.44	0.06	0.08	up
chr21:37256206:37256340:-@chr21:37242336:37242457:-@chr21:37240179:37240324:-@chr21:37232998:37233164:-	HLCS	0.55	0.44	0.62	0.83	0.69	0.63	0.536667	0.716667	0.62	0.83	0.44	0.63	up
chr21:44580115:44580069|44578372:-@chr21:44577344:44577573:-	C21orf2	0.18	0.33	0.2	0.46	0.7	0.43	0.236667	0.53	0.33	0.7	0.18	0.43	up
chr21:46742923:46743174:+@chr21:46748702:46748830:+@chr21:46753598:46753717:+	DIP2A	0.77	0.72	0.86	0.89	0.94	0.95	0.783333	0.926667	0.86	0.95	0.72	0.89	up
chr22:16694620:16694873:-@chr22:16690410:16690547:-@chr22:16685705:16685826:-	MICAL3	0.08	0.19	0.16	0.46	0.23	0.26	0.143333	0.316667	0.19	0.46	0.08	0.23	up
chr22:20313597:20314050:-@chr22:20313299:20313476:-	YDJC	0.36	0.33	0.35	0.43	0.52	0.41	0.346667	0.453333	0.36	0.52	0.33	0.41	up
chr22:26644993:26645533:+@chr22:26645711:26645954:+@chr22:26648006:26649176:+	TTC28-AS1	0.1	0.08	0.14	0.29	0.37	0.16	0.106667	0.273333	0.14	0.37	0.08	0.16	up
chr22:28564167:28564291:-@chr22:28560431:28560539:-@chr22:28558234:28558331:-	ASCC2	0.39	0.24	0.48	0.64	0.73	0.57	0.37	0.646667	0.48	0.73	0.24	0.57	up
chr22:29393449:29393873:-@chr22:29390942:29391108:-@chr22:29387450:29390067:-	DUSP18	0.1	0.18	0.18	0.22	0.42	0.2	0.153333	0.28	0.18	0.42	0.1	0.2	up
chr22:30254676:30254849:+@chr22:30257044:30257115:+@chr22:30272847:30272957:+	SFI1,DRG1	0.33	0.49	0.24	0.54	0.61	0.52	0.353333	0.556667	0.49	0.61	0.24	0.52	up
chr22:30347320:30347458:-@chr22:30346982:30347128:-	PISD,MIR7109	0.08	0.08	0.08	0.22	0.18	0.15	0.08	0.183333	0.08	0.22	0.08	0.15	up
chr22:38100267:38100504:+@chr22:38102003:38102148:+	SYNGR1	0.12	0.16	0.19	0.21	0.4	0.22	0.156667	0.276667	0.19	0.4	0.12	0.21	up
chr22:38100267:38100522:+@chr22:38102003:38102148:+	SYNGR1	0.2	0.21	0.25	0.27	0.59	0.34	0.22	0.4	0.25	0.59	0.2	0.27	up
chr22:38100267:38100611:+@chr22:38102003:38102148:+	SYNGR1	0.26	0.28	0.3	0.39	0.62	0.44	0.28	0.483333	0.3	0.62	0.26	0.39	up
chr22:39679406:39679583:+@chr22:39681237:39681396:+@chr22:39689997:39690989:+	RBX1,XPNPEP3	0.23	0.2	0.16	0.31	0.46	0.33	0.196667	0.366667	0.23	0.46	0.16	0.31	up
chr22:49362619:49362758:-@chr22:49362152:49362329:-@chr22:49361831:49361932:-	CPT1B,CHKB-CPT1B	0.65	0.78	0.78	0.86	0.81	0.89	0.736667	0.853333	0.78	0.89	0.65	0.81	up
chr2:114069740:114069956:+@chr2:114070115:114070250:+	WASH2P	0.08	0.12	0.08	0.23	0.14	0.23	0.0933333	0.2	0.12	0.23	0.08	0.14	up
chr2:121271335:121271514:+@chr2:121401407:121401512:+@chr2:121425289:121425512:+	GLI2	0.71	0.66	0.83	0.9	0.85	0.91	0.733333	0.886667	0.83	0.91	0.66	0.85	up
chr2:159238641:159238758:+@chr2:159241497:159241625:+@chr2:159243339:159243412:+	PKP4	0.46	0.38	0.29	0.85	0.69	0.47	0.376667	0.67	0.46	0.85	0.29	0.47	up
chr2:170389245:170389670:-@chr2:170385848:170386029:-@chr2:170376424:170377262:-	METTL5	0.46	0.71	0.68	0.72	0.78	0.75	0.616667	0.75	0.71	0.78	0.46	0.72	up
chr2:175647974:175648061:-@chr2:175647809|175647841:175647479:-	ATF2	0.55	0.33	0.22	0.57	0.57	0.66	0.366667	0.6	0.55	0.66	0.22	0.57	up
chr2:17798895:17799093:+@chr2:17804660|17804677:17804852:+	GEN1	0.25	0.13	0.26	0.29	0.46	0.3	0.213333	0.35	0.26	0.46	0.13	0.29	up
chr2:179023534:179024742:+@chr2:179026361|179026404:179026593:+	DFNB59	0.42	0.38	0.42	0.55	0.51	0.47	0.406667	0.51	0.42	0.55	0.38	0.47	up
chr2:190355985:190356094:-@chr2:190355393:190355573:-	ORMDL1	0.41	0.47	0.42	0.51	0.51	0.61	0.433333	0.543333	0.47	0.61	0.41	0.51	up
chr2:215944877:215945407:-@chr2:215943258:215943400:-@chr2:215940831:215940995:-	FN1	0.62	0.73	0.79	0.89	0.88	0.93	0.713333	0.9	0.79	0.93	0.62	0.88	up
chr2:215944877:215945407:-@chr2:215943262:215943395:-@chr2:215940831:215940995:-	FN1	0.76	0.66	0.79	0.89	0.88	0.89	0.736667	0.886667	0.79	0.89	0.66	0.88	up
chr2:215944877:215945407:-@chr2:215943395|215943400:215943262:-	FN1	0.58	0.77	0.82	0.91	0.87	0.95	0.723333	0.91	0.82	0.95	0.58	0.87	up
chr2:215946290:215946379:-@chr2:215945077:215945343:-@chr2:215944877:215944983:-	FN1	0.75	0.74	0.66	0.9	0.81	0.86	0.716667	0.856667	0.75	0.9	0.66	0.81	up
chr2:218838913:218838798|218838794:-@chr2:218838542:218838649:-	AAMP	0.06	0.08	0.03	0.15	0.31	0.09	0.0566667	0.183333	0.08	0.31	0.03	0.09	up
chr2:219807099:219807254:+@chr2:219807792:219808278:+	ANKZF1	0.4	0.36	0.42	0.59	0.52	0.48	0.393333	0.53	0.42	0.59	0.36	0.48	up
chr2:232310967:232311092:-@chr2:232310141:232310246:-@chr2:232305379:232305987:-	PDE6D	0.82	0.83	0.84	0.94	0.91	0.95	0.83	0.933333	0.84	0.95	0.82	0.91	up
chr2:232908727:232908828:+@chr2:232909168|232909423:232909931:+	DIS3L2	0.19	0.29	0.35	0.43	0.56	0.41	0.276667	0.466667	0.35	0.56	0.19	0.41	up
chr2:238100711:238100898:+@chr2:238107946:238108029:+@chr2:238113730:238113915:+	MLPH	0.13	0.26	0.1	0.42	0.4	0.31	0.163333	0.376667	0.26	0.42	0.1	0.31	up
chr2:238113662:238113915:+@chr2:238114184:238114339:+@chr2:238115949:238116041:+	MLPH	0.72	0.65	0.73	0.88	0.79	0.78	0.7	0.816667	0.73	0.88	0.65	0.78	up
chr2:242096094:242096705:-@chr2:242088828:242088884:-@chr2:242087345:242088369:-	STK25	0.85	0.77	0.77	0.94	0.89	0.91	0.796667	0.913333	0.85	0.94	0.77	0.89	up
chr2:254782:254951:-@chr2:252631:252750:-@chr2:249942:250702:-	SH3YL1	0.3	0.3	0.32	0.35	0.58	0.34	0.306667	0.423333	0.32	0.58	0.3	0.34	up
chr2:27163111:27163723:+@chr2:27168704:27168820:+@chr2:27173101:27173173:+	KHK	0.66	0.54	0.65	0.73	0.69	0.74	0.616667	0.72	0.66	0.74	0.54	0.69	up
chr2:27210659:27211052:-@chr2:27210026|27210081:27209904:-	PREB	0.56	0.59	0.62	0.68	0.78	0.65	0.59	0.703333	0.62	0.78	0.56	0.65	up
chr2:27334533:27334679:-@chr2:27334277:27334430:-@chr2:27333526:27333724:-	SLC30A3	0.63	0.51	0.64	0.83	0.73	0.76	0.593333	0.773333	0.64	0.83	0.51	0.73	up
chr2:36659244:36659512:-@chr2:36641432:36641512:-@chr2:36639085:36639160:-	FEZ2	0.23	0.16	0.14	0.33	0.24	0.3	0.176667	0.29	0.23	0.33	0.14	0.24	up
chr2:70271609:70271707:-@chr2:70263303:70263571:-@chr2:70261799:70262633:-	C2orf42	0.67	0.7	0.73	0.85	0.88	0.76	0.7	0.83	0.73	0.88	0.67	0.76	up
chr2:70271609:70271707:-@chr2:70263431:70263571:-@chr2:70261799:70262633:-	C2orf42	0.15	0.15	0.09	0.39	0.51	0.17	0.13	0.356667	0.15	0.51	0.09	0.17	up
chr2:70329041:70329293:-@chr2:70316709:70316811:-@chr2:70311392:70311490:-	TIA1,C2orf42	0.77	0.86	0.83	0.95	0.92	0.9	0.82	0.923333	0.86	0.95	0.77	0.9	up
chr2:73928022:73928207:+@chr2:73928298:73928388:+@chr2:73929998:73930122:+	STAMBP	0.76	0.81	0.82	0.95	0.85	0.9	0.796667	0.9	0.82	0.95	0.76	0.85	up
chr2:74608575:74608956:-@chr2:74608371:74608473:-	AUP1	0.51	0.45	0.52	0.63	0.75	0.53	0.493333	0.636667	0.52	0.75	0.45	0.53	up
chr2:86211282:86211375|86211371:+@chr2:86211712:86212320:+	PTCD3	0.5	0.38	0.45	0.63	0.52	0.59	0.443333	0.58	0.5	0.63	0.38	0.52	up
chr2:9481233:9481632:+@chr2:9484113:9484202:+@chr2:9486345:9486408:+	CPSF3	0.11	0.17	0.15	0.29	0.3	0.21	0.143333	0.266667	0.17	0.3	0.11	0.21	up
chr2:96576866:96576981:+@chr2:96578785:96578923:+@chr2:96579217:96580197:+	ARID5A	0.43	0.28	0.34	0.71	0.72	0.56	0.35	0.663333	0.43	0.72	0.28	0.56	up
chr3:10003578:10003948:+@chr3:10004499:10004589:+@chr3:10005396:10005431:+		0.28	0.37	0.23	0.38	0.5	0.52	0.293333	0.466667	0.37	0.52	0.23	0.38	up
chr3:109259014:109259106:-@chr3:109253476:109253507:-@chr3:109244629:109248829:-	CD47	0.8	0.75	0.58	0.84	0.9	0.85	0.71	0.863333	0.8	0.9	0.58	0.84	up
chr3:121077950:121078807:-@chr3:121068127:121068165:-@chr3:121064956:121065142:-	GSK3B	0.16	0.17	0.06	0.27	0.29	0.21	0.13	0.256667	0.17	0.29	0.06	0.21	up
chr3:123960761:123960897:-@chr3:123960309:123960390:-@chr3:123955953:123956968:-	HSPBAP1	0.1	0.18	0.09	0.24	0.29	0.2	0.123333	0.243333	0.18	0.29	0.09	0.2	up
chr3:130081024:130081550:+@chr3:130086186:130086279:+@chr3:130095088:130095189:+	ACAD9	0.75	0.67	0.78	0.86	0.84	0.84	0.733333	0.846667	0.78	0.86	0.67	0.84	up
chr3:130110877:130110954:+@chr3:130111554:130111682:+	ACAD9	0.26	0.26	0.26	0.34	0.62	0.28	0.26	0.413333	0.26	0.62	0.26	0.28	up
chr3:132095503:132095871:+@chr3:132096124|132096242:132096309:+	ATP2C1	0.61	0.59	0.55	0.65	0.8	0.79	0.583333	0.746667	0.61	0.8	0.55	0.65	up
chr3:133873311:133873415:+@chr3:133873584:133873711:+	UBA5	0.04	0.07	0.08	0.24	0.22	0.09	0.0633333	0.183333	0.08	0.24	0.04	0.09	up
chr3:135747681:135747820:+@chr3:135748867:135749004:+@chr3:135750594:135750708:+	CEP63	0.27	0.32	0.33	0.44	0.43	0.43	0.306667	0.433333	0.33	0.44	0.27	0.43	up
chr3:142461266:142461786:+@chr3:142463775:142463872:+@chr3:142479874:142480032:+	PXYLP1	0.2	0.24	0.26	0.38	0.51	0.33	0.233333	0.406667	0.26	0.51	0.2	0.33	up
chr3:142605459:142605563:+@chr3:142639775:142639897:+@chr3:142643921:142651324:+	ZBTB38	0.35	0.23	0.36	0.53	0.4	0.47	0.313333	0.466667	0.36	0.53	0.23	0.4	up
chr3:142605459:142605563:+@chr3:142639800:142639897:+@chr3:142643921:142651324:+	ZBTB38	0.33	0.25	0.28	0.5	0.37	0.43	0.286667	0.433333	0.33	0.5	0.25	0.37	up
chr3:162301621:162301715:-@chr3:162290426:162290523:-@chr3:162284365:162287270:-	B3GALNT1	0.11	0.1	0.21	0.25	0.38	0.26	0.14	0.296667	0.21	0.38	0.1	0.25	up
chr3:185343534:185344047:+@chr3:185344581:185344706:+	EIF2B5	0.34	0.38	0.35	0.42	0.61	0.39	0.356667	0.473333	0.38	0.61	0.34	0.39	up
chr3:185529391:185529617|185529472:+@chr3:185531748:185531846:+	EIF4G1,EIF2B5	0.04	0.06	0.04	0.15	0.46	0.1	0.0466667	0.236667	0.06	0.46	0.04	0.1	up
chr3:187984915:187985179:+@chr3:187985519:187985584:+@chr3:187986366:187987128:+	EIF4A2,MIR1248,,SNORD2	0.64	0.63	0.69	0.77	0.76	0.78	0.653333	0.77	0.69	0.78	0.63	0.76	up
chr3:196874623:196874785:+@chr3:196875676:196875819:+@chr3:196876138:196876302:+	MUC20	0.37	0.38	0.35	0.56	0.61	0.4	0.366667	0.523333	0.38	0.61	0.35	0.4	up
chr3:198405693:198405857:-@chr3:198361011:198361064:-@chr3:198353986:198354036:-	DLG1	0.71	0.78	0.83	0.87	0.92	0.91	0.773333	0.9	0.83	0.92	0.71	0.87	up
chr3:198834488:198834650:-@chr3:198833455:198833598:-@chr3:198832972:198833136:-	LOC220729	0.62	0.61	0.55	0.84	0.79	0.73	0.593333	0.786667	0.62	0.84	0.55	0.73	up
chr3:37111287:37111403:-@chr3:37107962:37108033:-@chr3:37100131:37100301:-	LRRFIP2	0.22	0.38	0.31	0.59	0.45	0.57	0.303333	0.536667	0.38	0.59	0.22	0.45	up
chr3:37963552:37963706:+@chr3:37973606:37973638:+@chr3:37981066:37981167:+	CTDSPL	0.35	0.35	0.35	0.4	0.56	0.49	0.35	0.483333	0.35	0.56	0.35	0.4	up
chr3:38143005:38143195:-@chr3:38142321:38142376:-	ACAA1	0.38	0.5	0.67	0.77	0.8	0.8	0.516667	0.79	0.67	0.8	0.38	0.77	up
chr3:38143195:38143005|38142657:-@chr3:38142321:38142376:-	ACAA1	0.56	0.7	0.82	0.87	0.9	0.9	0.693333	0.89	0.82	0.9	0.56	0.87	up
chr3:38156883:38157087:+@chr3:38157252:38157343:+	MYD88	0.31	0.21	0.21	0.49	0.67	0.36	0.243333	0.506667	0.31	0.67	0.21	0.36	up
chr3:38597426:38597866:-@chr3:38595829:38595987:-@chr3:38593156:38593276:-	SCN5A	0.19	0.37	0.23	0.51	0.41	0.51	0.263333	0.476667	0.37	0.51	0.19	0.41	up
chr3:47520824:47520942:-@chr3:47514784:47514926:-@chr3:47512134:47512691:-	ELP6	0.44	0.51	0.59	0.78	0.71	0.72	0.513333	0.736667	0.59	0.78	0.44	0.71	up
chr3:48707527:48708024:-@chr3:48707131:48707261:-@chr3:48706414:48706962:-	IP6K2	0.19	0.28	0.3	0.33	0.69	0.33	0.256667	0.45	0.3	0.69	0.19	0.33	up
chr3:48707527:48708024:-@chr3:48707244|48707261:48707131:-	IP6K2	0.49	0.38	0.46	0.65	0.79	0.78	0.443333	0.74	0.49	0.79	0.38	0.65	up
chr3:48707527:48708024:-@chr3:48707340:48707373:-@chr3:48707131:48707278:-@chr3:48706414:48706962:-	IP6K2	0.2	0.24	0.27	0.3	0.66	0.29	0.236667	0.416667	0.27	0.66	0.2	0.29	up
chr3:49482569:49482870:+@chr3:49489286:49489342:+@chr3:49499691:49499852:+	DAG1	0.32	0.45	0.38	0.46	0.68	0.49	0.383333	0.543333	0.45	0.68	0.32	0.46	up
chr3:49724916:49725329:+@chr3:49725950:49726024:+	RNF123	0.59	0.54	0.65	0.85	0.76	0.7	0.593333	0.77	0.65	0.85	0.54	0.7	up
chr3:50352991:50353385:-@chr3:50350340:50350446:-@chr3:50344485:50344589:-	RASSF1	0.56	0.68	0.69	0.81	0.86	0.78	0.643333	0.816667	0.69	0.86	0.56	0.78	up
chr3:50352991:50353385:-@chr3:50350340:50350458:-@chr3:50344485:50344589:-	RASSF1	0.43	0.63	0.52	0.66	0.82	0.68	0.526667	0.72	0.63	0.82	0.43	0.66	up
chr3:52300016:52300167:+@chr3:52300884:52300978:+@chr3:52301316:52304312:+	GLYCTK	0.74	0.49	0.74	0.75	0.81	0.82	0.656667	0.793333	0.74	0.82	0.49	0.75	up
chr3:58392644:58394451:-@chr3:58391709|58392560:58391424:-	PDHB	0.19	0.18	0.3	0.39	0.37	0.43	0.223333	0.396667	0.3	0.43	0.18	0.37	up
chr4:153920545:153920693:+@chr4:153931361:153931477:+@chr4:153947806:153947850:+@chr4:153970227:153970675:+	ARFIP1	0.2	0.22	0.16	0.63	0.32	0.24	0.193333	0.396667	0.22	0.63	0.16	0.24	up
chr4:184075435:184075629:-@chr4:184074028:184074035:-@chr4:184073608:184073722:-	DCTD	0.15	0.13	0.08	0.29	0.47	0.18	0.12	0.313333	0.15	0.47	0.08	0.18	up
chr4:186693490:186693760:-@chr4:186681510:186681594:-@chr4:186669902:186672485:-	PDLIM3	0.32	0.49	0.28	0.61	0.55	0.56	0.363333	0.573333	0.49	0.61	0.28	0.55	up
chr4:191101351:191101421:+@chr4:191110311:191110436:+@chr4:191113186:191113300:+@chr4:191115547:191115651:+	FRG1	0.46	0.45	0.52	0.72	0.7	0.61	0.476667	0.676667	0.52	0.72	0.45	0.61	up
chr4:2213576:2213689:-@chr4:2213045:2213306:-@chr4:2211563:2212618:-	HAUS3,POLN	0.38	0.39	0.29	0.54	0.51	0.47	0.353333	0.506667	0.39	0.54	0.29	0.47	up
chr4:2213576:2213689:-@chr4:2213045:2213315:-@chr4:2211563:2212618:-	HAUS3,POLN	0.53	0.56	0.46	0.77	0.59	0.72	0.516667	0.693333	0.56	0.77	0.46	0.59	up
chr4:2213576:2213689:-@chr4:2213045:2213362:-@chr4:2211563:2212618:-	HAUS3,POLN	0.46	0.46	0.41	0.62	0.49	0.57	0.443333	0.56	0.46	0.62	0.41	0.49	up
chr4:48590827:48590780|48589546:-@chr4:48582154:48582339:-	OCIAD2	0.44	0.4	0.38	0.58	0.53	0.47	0.406667	0.526667	0.44	0.58	0.38	0.47	up
chr4:84047962:84048112:+@chr4:84050874:84050988:+@chr4:84057121:84060453:+	THAP9	0.12	0.17	0.14	0.22	0.25	0.29	0.143333	0.253333	0.17	0.29	0.12	0.22	up
chr4:89417319:89418818:-@chr4:89414602:89414661:-@chr4:89411176:89411365:-@chr4:89408917:89409082:-	PPM1K	0.35	0.4	0.33	0.71	0.6	0.42	0.36	0.576667	0.4	0.71	0.33	0.42	up
chr4:90160634:90160843:-@chr4:90149125:90149252:-@chr4:90129793:90131324:-	FAM13A	0.09	0.13	0.15	0.32	0.23	0.25	0.123333	0.266667	0.15	0.32	0.09	0.23	up
chr4:916176:916328:+@chr4:931497|931904:931942:+	TMEM175	0.61	0.6	0.7	0.75	0.71	0.78	0.636667	0.746667	0.7	0.78	0.6	0.71	up
chr4:9726835:9727187:-@chr4:9723958:9724077:-@chr4:9718940:9719117:-@chr4:9714513:9714708:-	WDR1	0.1	0.14	0.05	0.2	0.28	0.15	0.0966667	0.21	0.14	0.28	0.05	0.15	up
chr5:109052966:109054152:+@chr5:109055395:109055502:+@chr5:109062036:109062114:+	MAN2A1	0.06	0.05	0.04	0.12	0.23	0.17	0.05	0.173333	0.06	0.23	0.04	0.12	up
chr5:137523657:137523761:-@chr5:137523143:137523187:-@chr5:137520470:137520855:-	BRD8	0.33	0.4	0.38	0.55	0.47	0.47	0.37	0.496667	0.4	0.55	0.33	0.47	up
chr5:138675350:138678324:+@chr5:138679285|138679317:138679326:+	MATR3	0.54	0.54	0.38	0.55	0.71	0.62	0.486667	0.626667	0.54	0.71	0.38	0.55	up
chr5:140989611:140989876:-@chr5:140989435:140989490:-	HDAC3	0.33	0.5	0.39	0.56	0.56	0.53	0.406667	0.55	0.5	0.56	0.33	0.53	up
chr5:141372744:141372804:-@chr5:141372037:141372126:-@chr5:141371598:141371790:-	GNPDA1	0.07	0.07	0.07	0.13	0.38	0.08	0.07	0.196667	0.07	0.38	0.07	0.08	up
chr5:1686021:1685759|1685648:-@chr5:1682283:1683681:-		0.17	0.4	0.26	0.64	0.43	0.5	0.276667	0.523333	0.4	0.64	0.17	0.43	up
chr5:175744828:175744934:-@chr5:175743890|175743893:175743555:-	NOP16	0.32	0.21	0.31	0.53	0.35	0.35	0.28	0.41	0.32	0.53	0.21	0.35	up
chr5:176892050:176892248:-@chr5:176891560:176891807:-@chr5:176890889:176891128:-	FAM193B	0.36	0.3	0.31	0.43	0.52	0.48	0.323333	0.476667	0.36	0.52	0.3	0.43	up
chr5:177490634:177490983:+@chr5:177494780:177494919:+@chr5:177495636:177495855:+@chr5:177497715:177498003:+	RMND5B	0.05	0.05	0.03	0.08	0.38	0.07	0.0433333	0.176667	0.05	0.38	0.03	0.07	up
chr5:177581962:177582870:-@chr5:177574883:177575037:-@chr5:177574403:177574492:-	PHYKPL	0.53	0.76	0.73	0.87	0.79	0.81	0.673333	0.823333	0.76	0.87	0.53	0.79	up
chr5:178976628:178976717:-@chr5:178975733:178975825:-	HNRNPH1	0.46	0.54	0.57	0.74	0.75	0.61	0.523333	0.7	0.57	0.75	0.46	0.61	up
chr5:38939741:38939883:+@chr5:38940209|38940212:38940362:+	OSMR	0.19	0.19	0.17	0.33	0.47	0.2	0.183333	0.333333	0.19	0.47	0.17	0.2	up
chr5:517405:517527:+@chr5:518226:518387:+	EXOC3	0.17	0.31	0.21	0.46	0.48	0.58	0.23	0.506667	0.31	0.58	0.17	0.46	up
chr5:60276761:60277012:+@chr5:60404709:60404798:+@chr5:60430576:60430616:+	NDUFAF2	0.74	0.67	0.78	0.84	0.88	0.83	0.73	0.85	0.78	0.88	0.67	0.83	up
chr5:61637746:61638120:+@chr5:61639893:61640095:+@chr5:61653167:61653305:+@chr5:61678714:61678808:+	KIF2A	0.17	0.23	0.13	0.55	0.36	0.3	0.176667	0.403333	0.23	0.55	0.13	0.3	up
chr5:68626376:68626483:-@chr5:68623771:68623945:-@chr5:68616920:68617050:-	CCDC125	0.7	0.63	0.7	0.76	0.79	0.81	0.676667	0.786667	0.7	0.81	0.63	0.76	up
chr5:922360:922519:-@chr5:921919|922234:921722:-	BRD9	0.53	0.61	0.49	0.81	0.78	0.68	0.543333	0.756667	0.61	0.81	0.49	0.68	up
chr6:109522998:109523471:+@chr6:109533931:109533986:+@chr6:109568317:109568571:+	CEP57L1	0.15	0.15	0.13	0.39	0.36	0.26	0.143333	0.336667	0.15	0.39	0.13	0.26	up
chr6:111302680:111303111:+@chr6:111318150:111318252:+@chr6:111320057:111320099:+	AMD1	0.33	0.31	0.23	0.8	0.37	0.36	0.29	0.51	0.33	0.8	0.23	0.36	up
chr6:139127087:139127208:-@chr6:139112958:139113099:-@chr6:139088041:139090323:-		0.44	0.42	0.35	0.58	0.55	0.46	0.403333	0.53	0.44	0.58	0.35	0.46	up
chr6:139275780:139275595|139275505:-@chr6:139273753:139274201:-	REPS1	0.09	0.09	0.04	0.33	0.18	0.13	0.0733333	0.213333	0.09	0.33	0.04	0.13	up
chr6:144329028:144328988|144328680:-@chr6:144327617:144327648:-	PLAGL1	0.47	0.49	0.38	0.63	0.59	0.6	0.446667	0.606667	0.49	0.63	0.38	0.59	up
chr6:159003770:159003832:+@chr6:159003993:159004398:+	SYTL3	0.47	0.5	0.45	0.72	0.53	0.78	0.473333	0.676667	0.5	0.78	0.45	0.53	up
chr6:166675897:166676411:-@chr6:166664863:166664925:-@chr6:166663639:166663725:-	SFT2D1	0.03	0.04	0.04	0.2	0.33	0.1	0.0366667	0.21	0.04	0.33	0.03	0.1	up
chr6:237053:237560:+@chr6:256880:256962:+@chr6:290854:290928:+	DUSP22	0.24	0.45	0.37	0.72	0.62	0.52	0.353333	0.62	0.45	0.72	0.24	0.52	up
chr6:26551574:26551649:+@chr6:26551777:26551866:+@chr6:26552164:26554192:+	BTN3A3	0.29	0.21	0.31	0.65	0.39	0.45	0.27	0.496667	0.31	0.65	0.21	0.39	up
chr6:26574269:26574295:+@chr6:26575926|26576155:26577844:+	BTN2A1	0.41	0.46	0.48	0.55	0.55	0.55	0.45	0.55	0.48	0.55	0.41	0.55	up
chr6:28347611:28348095|28348092:+@chr6:28348426:28348543:+	ZSCAN26	0.51	0.48	0.63	0.64	0.66	0.73	0.54	0.676667	0.63	0.73	0.48	0.64	up
chr6:30280412:30280521:-@chr6:30276791:30276839:-@chr6:30274422:30274909:-	TRIM26	0.35	0.28	0.26	0.37	0.5	0.37	0.296667	0.413333	0.35	0.5	0.26	0.37	up
chr6:32054659:32054766|32054754:+@chr6:32055170:32056304:+	STK19	0.26	0.14	0.13	0.4	0.55	0.39	0.176667	0.446667	0.26	0.55	0.13	0.39	up
chr6:33351720:33351825|33351823:+@chr6:33351931:33352260:+	RPS18	0.28	0.19	0.15	0.34	0.58	0.32	0.206667	0.413333	0.28	0.58	0.15	0.32	up
chr6:33855855:33855934:-@chr6:33853997:33854142:-	LEMD2	0.05	0.09	0.04	0.31	0.61	0.11	0.06	0.343333	0.09	0.61	0.04	0.11	up
chr6:36545807:36546012:+@chr6:36550676:36550817:+@chr6:36554876:36555100:+	KCTD20	0.41	0.66	0.51	0.83	0.71	0.77	0.526667	0.77	0.66	0.83	0.41	0.71	up
chr6:41154746:41154881:+@chr6:41156528:41156614:+@chr6:41159763:41159909:+	NFYA	0.08	0.09	0.04	0.18	0.39	0.14	0.07	0.236667	0.09	0.39	0.04	0.14	up
chr6:41861844:41862048:+@chr6:41862156|41862478:41863541:+	PRICKLE4,TOMM6	0.14	0.31	0.28	0.38	0.48	0.38	0.243333	0.413333	0.31	0.48	0.14	0.38	up
chr6:43004829:43005437:+@chr6:43010094:43010314:+@chr6:43011128:43011386:+	CNPY3	0.7	0.54	0.55	0.77	0.71	0.87	0.596667	0.783333	0.7	0.87	0.54	0.71	up
chr6:43513650:43513729:+@chr6:43514340:43514511:+	ABCC10	0.06	0.11	0.08	0.24	0.28	0.21	0.0833333	0.243333	0.11	0.28	0.06	0.21	up
chr6:43592443:43592706:-@chr6:43591762|43591829:43591605:-	YIPF3	0.5	0.52	0.59	0.8	0.67	0.78	0.536667	0.75	0.59	0.8	0.5	0.67	up
chr6:43592443:43592706:-@chr6:43591762|43591903:43591605:-	YIPF3	0.31	0.36	0.39	0.45	0.4	0.53	0.353333	0.46	0.39	0.53	0.31	0.4	up
chr6:49626931:49628242:+@chr6:49628649:49628879:+@chr6:49630549:49630967:+	C6orf141	0.18	0.17	0.2	0.27	0.43	0.26	0.183333	0.32	0.2	0.43	0.17	0.26	up
chr6:52639146:52639275:+@chr6:52639506:52641910:+	LOC730101	0.62	0.52	0.56	0.65	0.81	0.67	0.566667	0.71	0.62	0.81	0.52	0.65	up
chr6:99970946:99971025:-@chr6:99969169:99969283:-	PNISR	0.27	0.26	0.16	0.45	0.34	0.41	0.23	0.4	0.27	0.45	0.16	0.34	up
chr7:100289714:100289936:+@chr7:100292426:100292734:+@chr7:100294393:100294500:+	SLC12A9	0.62	0.72	0.65	0.84	0.9	0.89	0.663333	0.876667	0.72	0.9	0.62	0.84	up
chr7:102755339:102755437:-@chr7:102755015:102755061:-@chr7:102754226:102754367:-	DNAJC2	0.09	0.1	0.17	0.28	0.44	0.19	0.12	0.303333	0.17	0.44	0.09	0.19	up
chr7:150362293:150362448:+@chr7:150362525:150362619:+	ABCB8	0.17	0.14	0.22	0.37	0.45	0.24	0.176667	0.353333	0.22	0.45	0.14	0.24	up
chr7:152153048:152153140:+@chr7:152180144:152180269:+@chr7:152182476:152183397:+	ACTR3B	0.48	0.5	0.69	0.71	0.78	0.75	0.556667	0.746667	0.69	0.78	0.48	0.71	up
chr7:1556016:1556107:-@chr7:1554681:1554850:-	TMEM184A	0.26	0.32	0.29	0.63	0.47	0.49	0.29	0.53	0.32	0.63	0.26	0.47	up
chr7:24869640:24869743:-@chr7:24869344:24869436:-@chr7:24867757:24867913:-	OSBPL3	0.61	0.51	0.42	0.69	0.66	0.71	0.513333	0.686667	0.61	0.71	0.42	0.66	up
chr7:44624948:44625170|44625058:+@chr7:44630441:44631288:+	OGDH	0.1	0.12	0.14	0.21	0.37	0.2	0.12	0.26	0.14	0.37	0.1	0.2	up
chr7:63660738:63660947:-@chr7:63658759:63659086:-@chr7:63642119:63642245:-	ZNF680	0.15	0.18	0.12	0.19	0.34	0.23	0.15	0.253333	0.18	0.34	0.12	0.19	up
chr7:72019:72083:-@chr7:69147:69832:-@chr7:68862:68919:-		0.46	0.57	0.53	0.63	0.68	0.69	0.52	0.666667	0.57	0.69	0.46	0.63	up
chr7:72057788:72057966:-@chr7:72057367:72057577:-	NSUN5P1,NSUN5P2	0.61	0.68	0.74	0.82	0.8	0.77	0.676667	0.796667	0.74	0.82	0.61	0.77	up
chr7:74882806:74882984:+@chr7:74883195:74883405:+	NSUN5P1	0.56	0.63	0.57	0.74	0.76	0.7	0.586667	0.733333	0.63	0.76	0.56	0.7	up
chr7:74882806:74882992:+@chr7:74883195:74883405:+	NSUN5P1	0.6	0.67	0.6	0.74	0.76	0.77	0.623333	0.756667	0.67	0.77	0.6	0.74	up
chr7:77038331:77038439:+@chr7:77050808:77050903:+@chr7:77052796:77052834:+	PTPN12	0.68	0.68	0.61	0.78	0.75	0.81	0.656667	0.78	0.68	0.81	0.61	0.75	up
chr7:91507924:91508148:+@chr7:91509296:91509436:+@chr7:91509918:91510393:+	AKAP9	0.63	0.63	0.63	0.87	0.83	0.79	0.63	0.83	0.63	0.87	0.63	0.79	up
chr7:97437018:97437718:-@chr7:97436253:97436300:-@chr7:97434334:97434499:-@chr7:97433654:97434225:-		0.12	0.08	0.06	0.23	0.23	0.25	0.0866667	0.236667	0.12	0.25	0.06	0.23	up
chr7:97718796:97718667|97718642:-@chr7:97713137:97713413:-	TECPR1	0.55	0.43	0.39	0.76	0.78	0.58	0.456667	0.706667	0.55	0.78	0.39	0.58	up
chr7:99493257:99493449:+@chr7:99499347:99499538:+@chr7:99499642:99500597:+	ZSCAN21	0.67	0.5	0.84	0.86	0.88	0.88	0.67	0.873333	0.84	0.88	0.5	0.86	up
chr8:102286839:102287136:-@chr8:102286054:102286097:-@chr8:102283737:102283851:-	ZNF706	0.2	0.16	0.13	0.36	0.48	0.21	0.163333	0.35	0.2	0.48	0.13	0.21	up
chr8:128875942:128876162:+@chr8:128877322:128877436:+@chr8:128936583:128936747:+	PVT1,MIR1204	0.42	0.45	0.3	0.7	0.46	0.5	0.39	0.553333	0.45	0.7	0.3	0.46	up
chr8:144962767:144963183:-@chr8:144961710:144961772:-@chr8:144961082:144961171:-	SCRIB,MIR937	0.22	0.3	0.16	0.41	0.33	0.48	0.226667	0.406667	0.3	0.48	0.16	0.33	up
chr8:145551907:145551970:-@chr8:145551458:145551589:-	FBXL6	0.69	0.74	0.73	0.8	0.78	0.91	0.72	0.83	0.74	0.91	0.69	0.78	up
chr8:145621874:145622399:-@chr8:145621137:145621231:-	VPS28	0.67	0.67	0.75	0.89	0.78	0.83	0.696667	0.833333	0.75	0.89	0.67	0.78	up
chr8:145621874:145622399:-@chr8:145621137:145621242:-	VPS28	0.53	0.45	0.57	0.58	0.7	0.64	0.516667	0.64	0.57	0.7	0.45	0.58	up
chr8:145709672:145709608|145709409:-@chr8:145708833:145709329:-	RECQL4	0.64	0.56	0.64	0.65	0.77	0.75	0.613333	0.723333	0.64	0.77	0.56	0.65	up
chr8:17615003:17615041:-@chr8:17610665:17610757:-@chr8:17586117:17586331:-	MTUS1	0.02	0.03	0.02	0.13	0.28	0.04	0.0233333	0.15	0.03	0.28	0.02	0.04	up
chr8:17963247:17963166|17963154:-@chr8:17961361:17961492:-	ASAH1	0.04	0.05	0.02	0.15	0.25	0.09	0.0366667	0.163333	0.05	0.25	0.02	0.09	up
chr8:42315129:42315360:+@chr8:42315687:42315744:+@chr8:42321628:42321694:+	POLB	0.58	0.53	0.45	0.65	0.7	0.63	0.52	0.66	0.58	0.7	0.45	0.63	up
chr9:123070201:123070318:+@chr9:123083573:123083661:+@chr9:123104062:123104266:+	GSN	0.37	0.32	0.41	0.42	0.66	0.5	0.366667	0.526667	0.41	0.66	0.32	0.42	up
chr9:126660637:126660558|126660376:-@chr9:126659976:126660167:-	RPL35	0.06	0.09	0.1	0.19	0.3	0.11	0.0833333	0.2	0.1	0.3	0.06	0.11	up
chr9:127005108:127005196|127005166:+@chr9:127009664:127009837:+	RABEPK	0.08	0.11	0.03	0.19	0.31	0.18	0.0733333	0.226667	0.11	0.31	0.03	0.18	up
chr9:127737572:127737707:+@chr9:127751478:127751540:+@chr9:127762784:127762949:+	PBX3	0.09	0.12	0.08	0.23	0.24	0.19	0.0966667	0.22	0.12	0.24	0.08	0.19	up
chr9:129964104:129964444|129964215:+@chr9:129965543:129966028:+	C9orf16	0.15	0.14	0.11	0.23	0.35	0.17	0.133333	0.25	0.15	0.35	0.11	0.17	up
chr9:130684212:130684350:+@chr9:130688115:130688221:+@chr9:130709257:130711421:+	LRRC8A	0.81	0.73	0.79	0.86	0.92	0.91	0.776667	0.896667	0.81	0.92	0.73	0.86	up
chr9:133375111:133375270:+@chr9:133375468:133375623:+	POMT1	0.36	0.58	0.43	0.73	0.74	0.59	0.456667	0.686667	0.58	0.74	0.36	0.59	up
chr9:134776210:134776776:-@chr9:134775897|134775900:134775779:-	TSC1	0.53	0.64	0.56	0.87	0.75	0.75	0.576667	0.79	0.64	0.87	0.53	0.75	up
chr9:135206227:135206386|135206376:+@chr9:135206596:135206728:+	RPL7A	0.41	0.43	0.45	0.54	0.56	0.51	0.43	0.536667	0.45	0.56	0.41	0.51	up
chr9:139128138:139128301:-@chr9:139127479:139127482:-@chr9:139126758:139127392:-	DPP7	0.38	0.19	0.42	0.53	0.43	0.44	0.33	0.466667	0.42	0.53	0.19	0.43	up
chr9:139627169:139627783|139627279:+@chr9:139627888:139628507:+	ARRDC1	0.46	0.58	0.63	0.67	0.72	0.65	0.556667	0.68	0.63	0.72	0.46	0.65	up
chr9:139742598:139742802:+@chr9:139757644|139757665:139757801:+	EHMT1	0.44	0.33	0.44	0.55	0.64	0.48	0.403333	0.556667	0.44	0.64	0.33	0.48	up
chr9:34607882:34607968:-@chr9:34604707:34604765:-	DCTN3	0.4	0.49	0.43	0.7	0.55	0.58	0.44	0.61	0.49	0.7	0.4	0.55	up
chr9:34627264:34627417:-@chr9:34626994:34627109:-	SIGMAR1	0.32	0.52	0.52	0.58	0.7	0.56	0.453333	0.613333	0.52	0.7	0.32	0.56	up
chr9:34636890:34637958:+@chr9:34638045:34638168:+@chr9:34638331:34638891:+	GALT	0.53	0.82	0.82	0.85	0.91	0.88	0.723333	0.88	0.82	0.91	0.53	0.85	up
chr9:35080463:35080669:-@chr9:35080063:35080281:-@chr9:35079377:35079447:-	PIGO	0.71	0.72	0.79	0.88	0.81	0.86	0.74	0.85	0.79	0.88	0.71	0.81	up
chr9:36562863:36563004:+@chr9:36570845:36570852:+@chr9:36571641:36571736:+	MELK	0.11	0.13	0.07	0.18	0.27	0.2	0.103333	0.216667	0.13	0.27	0.07	0.18	up
chr9:36571641:36571736:+@chr9:36573624:36573709:+@chr9:36579533:36579888:+	MELK	0.84	0.89	0.75	0.96	0.9	0.93	0.826667	0.93	0.89	0.96	0.75	0.9	up
chr9:70869674:70869779|70869771:+@chr9:70877348:70879628:+	FXN	0.14	0.13	0.1	0.26	0.26	0.18	0.123333	0.233333	0.14	0.26	0.1	0.18	up
chr9:7093685:7093870:+@chr9:7095402:7095500:+@chr9:7118066:7118236:+	KDM4C	0.04	0.14	0.23	0.36	0.32	0.24	0.136667	0.306667	0.23	0.36	0.04	0.24	up
chr9:95101173:95101364:+@chr9:95108880:95108924:+@chr9:95110431:95110687:+	WNK2	0.17	0.16	0.14	0.28	0.4	0.22	0.156667	0.3	0.17	0.4	0.14	0.22	up
chrX:117996336:117996454:+@chrX:118000812:118000934:+@chrX:118007399:118007663:+	LONRF3	0.29	0.19	0.27	0.32	0.69	0.48	0.25	0.496667	0.29	0.69	0.19	0.32	up
chrX:118647309:118647499:-@chrX:118636704:118636777:-@chrX:118633715:118634733:-	SEPT6	0.52	0.47	0.23	0.55	0.56	0.62	0.406667	0.576667	0.52	0.62	0.23	0.55	up
chrX:122821560:122821824:+@chrX:122847162:122848070:+@chrX:122850150:122850249:+	XIAP	0.64	0.69	0.65	0.75	0.88	0.71	0.66	0.78	0.69	0.88	0.64	0.71	up
chrX:13617137:13617328:+@chrX:13631775|13631854:13631942:+	RAB9A	0.18	0.26	0.16	0.62	0.52	0.29	0.2	0.476667	0.26	0.62	0.16	0.29	up
chrX:13679289:13679408:+@chrX:13680744|13681408:13681481:+	OFD1	0.42	0.5	0.42	0.65	0.6	0.72	0.446667	0.656667	0.5	0.72	0.42	0.6	up
chrX:153238996:153239185:-@chrX:153238813:153238836:-@chrX:153236387:153236634:-	FLNA	0.45	0.44	0.44	0.68	0.6	0.59	0.443333	0.623333	0.45	0.68	0.44	0.59	up
chrX:153656664:153656746|153656742:+@chrX:153657656:153657793:+	DKC1,MIR664B	0.05	0.04	0.04	0.12	0.25	0.08	0.0433333	0.15	0.05	0.25	0.04	0.08	up
chrX:46913658:46913841:+@chrX:46915371:46915601:+@chrX:46917471:46917540:+	RBM10	0.63	0.65	0.65	0.78	0.81	0.67	0.643333	0.753333	0.65	0.81	0.63	0.67	up
chrX:47211667:47212103:-@chrX:47200741|47200781:47200615:-	ZNF41	0.17	0.23	0.21	0.31	0.53	0.36	0.203333	0.4	0.23	0.53	0.17	0.31	up
chrX:47211667:47212103:-@chrX:47200757|47200781:47200615:-	ZNF41	0.27	0.21	0.1	0.41	0.49	0.46	0.193333	0.453333	0.27	0.49	0.1	0.41	up
chrX:48252756:48253288:+@chrX:48254627|48254698:48254819:+	PORCN	0.46	0.37	0.61	0.75	0.74	0.69	0.48	0.726667	0.61	0.75	0.37	0.69	up
chrX:57164451:57164705:-@chrX:57163789|57163792:57162838:-	SPIN2B	0.34	0.16	0.38	0.58	0.41	0.56	0.293333	0.516667	0.38	0.58	0.16	0.41	up
chrX:62697437:62697735:-@chrX:62646549:62646684:-@chrX:62568291:62569096:-	LINC01278	0.2	0.08	0.07	0.36	0.3	0.22	0.116667	0.293333	0.2	0.36	0.07	0.22	up
chrX:62891281:62890920|62890909:-@chrX:62861137:62861316:-	ARHGEF9	0.16	0.12	0.16	0.41	0.42	0.24	0.146667	0.356667	0.16	0.42	0.12	0.24	up
chrX:73080887:73081222:+@chrX:73097092:73097214:+@chrX:73131400:73132174:+	JPX	0.14	0.16	0.16	0.5	0.19	0.21	0.153333	0.3	0.16	0.5	0.14	0.19	up
chrX:76838721:76838848:-@chrX:76835969:76836082:-@chrX:76830967:76831076:-	ATRX	0.64	0.69	0.66	0.81	0.84	0.81	0.663333	0.82	0.69	0.84	0.64	0.81	up
chrX:99785819:99786168:+@chrX:99787846|99787975:99788057:+	SRPX2	0.55	0.63	0.47	0.71	0.72	0.69	0.55	0.706667	0.63	0.72	0.47	0.69	up
chr10:102237774:102237845:-@chr10:102236393:102237542:-	SEC31B	0.87	0.8	0.93	0.63	0.57	0.71	0.866667	0.636667	0.93	0.71	0.8	0.57	down
chr10:105201903:105202152:-@chr10:105200929|105201032:105200830:-	CALHM2	0.67	0.73	0.57	0.56	0.54	0.5	0.656667	0.533333	0.73	0.56	0.57	0.5	down
chr10:105757925:105758104:+@chr10:105760564:105760656:+@chr10:105767908:105768037:+	SLK	0.76	0.53	0.68	0.1	0.22	0.07	0.656667	0.13	0.76	0.22	0.53	0.07	down
chr10:114144514:114144850:+@chr10:114148649|114148653:114148757:+	ACSL5	0.98	0.97	0.99	0.78	0.85	0.96	0.98	0.863333	0.99	0.96	0.97	0.78	down
chr10:114701154:114701356:+@chr10:114714305:114714373:+@chr10:114789774:114789879:+	TCF7L2	0.7	0.75	0.72	0.52	0.69	0.56	0.723333	0.59	0.75	0.69	0.7	0.52	down
chr10:114907522:114907818:+@chr10:114908416:114908466:+@chr10:114910368:114910440:+@chr10:114915304:114917427:+	TCF7L2	0.74	0.7	0.69	0.47	0.57	0.58	0.71	0.54	0.74	0.58	0.69	0.47	down
chr10:114907522:114907818:+@chr10:114910368:114910440:+@chr10:114915304:114917427:+	TCF7L2	0.7	0.73	0.76	0.47	0.52	0.59	0.73	0.526667	0.76	0.59	0.7	0.47	down
chr10:114909669:114909741:+@chr10:114910368:114910440:+@chr10:114911328:114911352:+@chr10:114915304:114917427:+	TCF7L2	0.88	0.78	0.84	0.58	0.58	0.7	0.833333	0.62	0.88	0.7	0.78	0.58	down
chr10:120091772:120091853:-@chr10:120091229:120091429:-@chr10:120085684:120085925:-	FAM204A	0.68	0.71	0.64	0.54	0.58	0.53	0.676667	0.55	0.71	0.58	0.64	0.53	down
chr10:123269483:123269715:-@chr10:123268186:123268333:-@chr10:123266823:123266967:-	FGFR2	0.9	0.69	0.89	0.62	0.54	0.65	0.826667	0.603333	0.9	0.65	0.69	0.54	down
chr10:127404241:127404397:+@chr10:127407562:127407663:+@chr10:127407917:127408038:+	EDRF1	0.85	0.71	0.85	0.64	0.59	0.69	0.803333	0.64	0.85	0.69	0.71	0.59	down
chr10:31648107:31648227:+@chr10:31716059:31716201:+@chr10:31789972:31790752:+	ZEB1	0.36	0.25	0.11	0.1	0.08	0.1	0.24	0.0933333	0.36	0.1	0.11	0.08	down
chr10:51555823:51555945:+@chr10:51556926:51556988:+@chr10:51557349:51557561:+	FAM21A	0.85	0.96	0.96	0.83	0.77	0.83	0.923333	0.81	0.96	0.83	0.85	0.77	down
chr10:5972200:5972315:+@chr10:5972988:5973085:+@chr10:5975946:5976032:+@chr10:5984989:5985144:+	FBXO18	0.61	0.68	0.73	0.36	0.59	0.31	0.673333	0.42	0.73	0.59	0.61	0.31	down
chr10:6059746:6060157:-@chr10:6048114:6048308:-@chr10:6042336:6042536:-	IL15RA	0.86	0.71	0.74	0.65	0.41	0.67	0.77	0.576667	0.86	0.67	0.71	0.41	down
chr10:73765695:73765598|73765367:-@chr10:73762594:73764381:-	DNAJB12	0.58	0.52	0.57	0.46	0.39	0.46	0.556667	0.436667	0.58	0.46	0.52	0.39	down
chr10:97436242:97436277:-@chr10:97435303:97435383:-@chr10:97434246:97434371:-	TCTN3	0.82	0.81	0.83	0.78	0.53	0.64	0.82	0.65	0.83	0.78	0.81	0.53	down
chr10:97806448:97806747:+@chr10:97806868|97806871:97806994:+	CCNJ	0.38	0.36	0.33	0.24	0.26	0.26	0.356667	0.253333	0.38	0.26	0.33	0.24	down
chr11:118406769:118406826:-@chr11:118406152:118406655:-@chr11:118403548:118405484:-	SLC37A4	0.42	0.3	0.42	0.29	0.19	0.25	0.38	0.243333	0.42	0.29	0.3	0.19	down
chr11:118477058:118476961|118476938:-@chr11:118476550:118476747:-	DPAGT1	0.84	0.74	0.85	0.73	0.53	0.69	0.81	0.65	0.85	0.73	0.74	0.53	down
chr11:124252267:124252415|124252290:+@chr11:124252625:124253902:+	ROBO3	0.45	0.4	0.44	0.23	0.38	0.16	0.43	0.256667	0.45	0.38	0.4	0.16	down
chr11:124460834:124461124:+@chr11:124461310:124461366:+@chr11:124463225:124465854:+	SLC37A2	0.74	0.64	0.59	0.39	0.41	0.26	0.656667	0.353333	0.74	0.41	0.59	0.26	down
chr11:124947564:124947675:+@chr11:124950357|124950379:124950514:+	EI24	0.79	0.79	0.93	0.69	0.17	0.74	0.836667	0.533333	0.93	0.74	0.79	0.17	down
chr11:124967901:124968023:+@chr11:124968743:124968830:+@chr11:124969155:124969202:+@chr11:124970986:124971108:+	STT3A	0.89	0.88	0.78	0.76	0.68	0.69	0.85	0.71	0.89	0.76	0.78	0.68	down
chr11:125030330:125030452:+@chr11:125031311:125031440:+@chr11:125051033:125051360:+	CHEK1	0.72	0.49	0.47	0.34	0.33	0.35	0.56	0.34	0.72	0.35	0.47	0.33	down
chr11:125658024:125658258:+@chr11:125665567:125665690:+@chr11:125665908:125666066:+	TIRAP	0.9	0.9	0.93	0.83	0.7	0.87	0.91	0.8	0.93	0.87	0.9	0.7	down
chr11:129497333:129497618:+@chr11:129498717:129498884:+@chr11:129501805:129501935:+	APLP2	0.53	0.49	0.54	0.36	0.34	0.34	0.52	0.346667	0.54	0.36	0.49	0.34	down
chr11:13441215:13441419:-@chr11:13423147:13423276:-@chr11:13399765:13399961:-	BTBD10	0.4	0.41	0.36	0.24	0.32	0.31	0.39	0.29	0.41	0.32	0.36	0.24	down
chr11:1436998:1437045|1437042:+@chr11:1438776:1440495:+	BRSK2	0.67	0.71	0.69	0.56	0.52	0.58	0.69	0.553333	0.71	0.58	0.67	0.52	down
chr11:1449101:1451269:-@chr11:1448290|1448294:1447295:-	MOB2	0.92	0.89	0.93	0.88	0.68	0.83	0.913333	0.796667	0.93	0.88	0.89	0.68	down
chr11:1449101:1451269:-@chr11:1448536:1448540:-@chr11:1447264:1448290:-	MOB2	0.51	0.34	0.55	0.28	0.3	0.27	0.466667	0.283333	0.55	0.3	0.34	0.27	down
chr11:17055600:17055561|17055552:-@chr11:17054314:17055369:-	RPS13	0.67	0.74	0.72	0.63	0.54	0.43	0.71	0.533333	0.74	0.63	0.67	0.43	down
chr11:28268329:28268520:+@chr11:28274876|28274920:28275054:+	METTL15	0.88	0.93	0.9	0.81	0.77	0.82	0.903333	0.8	0.93	0.82	0.88	0.77	down
chr11:3339549:3339695:-@chr11:3338526:3338594:-@chr11:3335732:3338371:-	ZNF195	0.32	0.25	0.23	0.06	0.14	0.07	0.266667	0.09	0.32	0.14	0.23	0.06	down
chr11:3355423:3355706:-@chr11:3351383:3351447:-@chr11:3349383:3349509:-	ZNF195	0.52	0.75	0.66	0.3	0.47	0.45	0.643333	0.406667	0.75	0.47	0.52	0.3	down
chr11:35167785:35168188:+@chr11:35174869:35174997:+@chr11:35176244:35176369:+	CD44	0.38	0.39	0.3	0.2	0.26	0.19	0.356667	0.216667	0.39	0.26	0.3	0.19	down
chr11:35167785:35168188:+@chr11:35176271:35176369:+@chr11:35179205:35179318:+	CD44	0.86	0.84	0.75	0.49	0.7	0.34	0.816667	0.51	0.86	0.7	0.75	0.34	down
chr11:35167785:35168188:+@chr11:35179205:35179318:+@chr11:35182635:35182782:+	CD44	0.35	0.4	0.36	0.21	0.13	0.07	0.37	0.136667	0.4	0.21	0.35	0.07	down
chr11:35167785:35168188:+@chr11:35182635:35182763:+@chr11:35184235:35184366:+	CD44	0.95	0.93	0.93	0.82	0.78	0.63	0.936667	0.743333	0.95	0.82	0.93	0.63	down
chr11:35167785:35168188:+@chr11:35184235:35184366:+@chr11:35186228:35186329:+	CD44	0.36	0.32	0.4	0.21	0.18	0.15	0.36	0.18	0.4	0.21	0.32	0.15	down
chr11:35167785:35168188:+@chr11:35188088:35188177:+@chr11:35189369:35190301:+	CD44	0.98	0.99	0.99	0.74	0.83	0.78	0.986667	0.783333	0.99	0.83	0.98	0.74	down
chr11:35167958:35168095:+@chr11:35189369:35189572:+@chr11:35192975:35193037:+	CD44	0.92	0.91	0.96	0.81	0.79	0.86	0.93	0.82	0.96	0.86	0.91	0.79	down
chr11:410463:410615:-@chr11:409582:409729:-	ANO9	0.79	0.76	0.9	0.67	0.65	0.74	0.816667	0.686667	0.9	0.74	0.76	0.65	down
chr11:43422182:43422335|43422278:+@chr11:43424057:43425773:+	TTC17	0.74	0.84	0.84	0.72	0.53	0.7	0.806667	0.65	0.84	0.72	0.74	0.53	down
chr11:44915479:44915431|44915236:-@chr11:44913688:44915026:-	TP53I11	0.32	0.54	0.58	0.13	0.31	0.29	0.48	0.243333	0.58	0.31	0.32	0.13	down
chr11:45904166:45904278:+@chr11:45904349:45904474:+	LARGE2	0.57	0.61	0.54	0.51	0.39	0.45	0.573333	0.45	0.61	0.51	0.54	0.39	down
chr11:496609:497112:-@chr11:494972|495001:494824:-	RNH1	0.81	0.62	0.7	0.59	0.57	0.59	0.71	0.583333	0.81	0.59	0.62	0.57	down
chr11:62059051:62059238:-@chr11:62015780:62015879:-@chr11:61957590:61957939:-	AHNAK	0.81	0.66	0.77	0.57	0.42	0.58	0.746667	0.523333	0.81	0.58	0.66	0.42	down
chr11:62378567:62378599:-@chr11:62378066:62378112:-	SNHG1	0.51	0.65	0.57	0.47	0.46	0.46	0.576667	0.463333	0.65	0.47	0.51	0.46	down
chr11:62378567:62378986:-@chr11:62378066:62378112:-@chr11:62377849:62377881:-	SNHG1	0.36	0.4	0.47	0.18	0.34	0.3	0.41	0.273333	0.47	0.34	0.36	0.18	down
chr11:65890478:65890839:-@chr11:65890238|65890278:65890173:-	SLC29A2	0.82	0.72	0.92	0.65	0.6	0.62	0.82	0.623333	0.92	0.65	0.72	0.6	down
chr11:67130899:67131123:+@chr11:67132443:67132504:+@chr11:67132599:67132769:+	NDUFV1	0.8	0.86	0.88	0.7	0.71	0.69	0.846667	0.7	0.88	0.71	0.8	0.69	down
chr11:93126750:93126851:+@chr11:93128024:93128200:+@chr11:93130130:93130279:+	C11orf54	0.91	0.92	0.94	0.79	0.83	0.78	0.923333	0.8	0.94	0.83	0.91	0.78	down
chr11:974645:974753:+@chr11:975432|975435:975582:+	AP2A2	0.3	0.4	0.32	0.22	0.2	0.27	0.34	0.23	0.4	0.27	0.3	0.2	down
chr12:109390549:109391206:+@chr12:109395266|109395271:109395306:+	FAM216A	0.81	0.82	0.87	0.67	0.5	0.78	0.833333	0.65	0.87	0.78	0.81	0.5	down
chr12:118993809:118993988:+@chr12:118994698:118994916:+@chr12:119003074:119003204:+	BICDL1	0.88	0.85	0.79	0.7	0.65	0.77	0.84	0.706667	0.88	0.77	0.79	0.65	down
chr12:120240687:120240794:-@chr12:120240463:120240537:-	ANAPC5	0.82	0.84	0.89	0.72	0.65	0.81	0.85	0.726667	0.89	0.81	0.82	0.65	down
chr12:120723996:120725073:-@chr12:120723861:120723897:-@chr12:120722046:120722245:-	LINC01089	0.42	0.46	0.61	0.31	0.32	0.28	0.496667	0.303333	0.61	0.32	0.42	0.28	down
chr12:120724920:120726042:-@chr12:120724092|120724097:120723996:-	LINC01089	0.59	0.63	0.59	0.55	0.58	0.37	0.603333	0.5	0.63	0.58	0.59	0.37	down
chr12:121473021:121473128:-@chr12:121467827:121467963:-@chr12:121450632:121450743:-@chr12:121430868:121431058:-	CLIP1	0.62	0.62	0.68	0.45	0.51	0.57	0.64	0.51	0.68	0.57	0.62	0.45	down
chr12:131154495:131154668:+@chr12:131154873|131155065:131155802:+	EP400NL	0.95	0.85	0.82	0.71	0.66	0.75	0.873333	0.706667	0.95	0.75	0.82	0.66	down
chr12:131154495:131154668:+@chr12:131154876|131155065:131155802:+	EP400NL	0.95	0.85	0.83	0.73	0.68	0.76	0.876667	0.723333	0.95	0.76	0.83	0.68	down
chr12:131154495:131154668:+@chr12:131155065:131155802:+	EP400NL	0.95	0.85	0.77	0.72	0.6	0.75	0.856667	0.69	0.95	0.75	0.77	0.6	down
chr12:31133604:31133691|31133686:+@chr12:31134087:31134295:+	DDX11	0.91	0.85	0.84	0.76	0.64	0.8	0.866667	0.733333	0.91	0.8	0.84	0.64	down
chr12:31143988:31144908:+@chr12:31145228|31145246:31145331:+	DDX11	0.86	0.77	0.79	0.7	0.64	0.69	0.806667	0.676667	0.86	0.7	0.77	0.64	down
chr12:31634907:31635219:-@chr12:31585121:31585232:-@chr12:31540011:31540120:-	DENND5B	0.13	0.25	0.18	0.12	0.05	0.02	0.186667	0.0633333	0.25	0.12	0.13	0.02	down
chr12:45759512:45760001:-@chr12:45759192:45759298:-@chr12:45755757:45759115:-	AMIGO2	0.5	0.62	0.52	0.45	0.32	0.27	0.546667	0.346667	0.62	0.45	0.5	0.27	down
chr12:46646139:46646222|46646219:+@chr12:46646733:46647905:+	TMEM106C	0.65	0.83	0.61	0.44	0.58	0.58	0.696667	0.533333	0.83	0.58	0.61	0.44	down
chr12:47605350:47605877:-@chr12:47605172|47605216:47605096:-	FKBP11,ARF3	0.59	0.39	0.38	0.27	0.36	0.28	0.453333	0.303333	0.59	0.36	0.38	0.27	down
chr12:51975890:51976326|51975992:+@chr12:51977901:51977975:+	PFDN5	0.74	0.78	0.73	0.66	0.67	0.58	0.75	0.636667	0.78	0.67	0.73	0.58	down
chr12:55351800:55353116:-@chr12:55346255:55346317:-@chr12:55343943:55344851:-	PTGES3	0.69	0.6	0.58	0.52	0.45	0.55	0.623333	0.506667	0.69	0.55	0.58	0.45	down
chr12:56197756:56200612:-@chr12:56197474|56197488:56197319:-	MIR616,DDIT3	0.79	0.57	0.73	0.47	0.35	0.35	0.696667	0.39	0.79	0.47	0.57	0.35	down
chr12:68958175:68958321:+@chr12:68965447:68965633:+@chr12:68974118:68974341:+@chr12:68990942:68991064:+	CNOT2	0.23	0.37	0.21	0.11	0.2	0.06	0.27	0.123333	0.37	0.2	0.21	0.06	down
chr12:69148125:69148374:+@chr12:69187942:69188048:+@chr12:69190259:69190624:+		0.85	0.76	0.76	0.74	0.5	0.65	0.79	0.63	0.85	0.74	0.76	0.5	down
chr12:6925888:6926163:+@chr12:6931033:6931159:+@chr12:6931407:6931648:+	PTPN6	0.72	0.66	0.72	0.62	0.53	0.59	0.7	0.58	0.72	0.62	0.66	0.53	down
chr12:6925888:6926163:+@chr12:6931336|6931407:6931601:+	PTPN6	0.56	0.53	0.56	0.16	0.36	0.24	0.55	0.253333	0.56	0.36	0.53	0.16	down
chr12:75405421:75405529:-@chr12:75377770:75377806:-@chr12:75368762:75368899:-	OSBPL8	0.66	0.58	0.63	0.39	0.39	0.44	0.623333	0.406667	0.66	0.44	0.58	0.39	down
chr12:78704285:78704825:-@chr12:78700482:78700506:-@chr12:78696461:78699773:-	PPP1R12A	0.47	0.48	0.46	0.23	0.43	0.21	0.47	0.29	0.48	0.43	0.46	0.21	down
chr12:88443028:88443495:-@chr12:88409844:88410023:-@chr12:88385525:88385593:-	GALNT4,POC1B-GALNT4,POC1B	0.53	0.68	0.71	0.3	0.36	0.2	0.64	0.286667	0.71	0.36	0.53	0.2	down
chr12:895771:896247:-@chr12:893956|893959:893858:-	RAD52	0.91	0.88	0.94	0.79	0.8	0.83	0.91	0.806667	0.94	0.83	0.88	0.79	down
chr12:99085245:99085352:-@chr12:99084979:99085050:-@chr12:99084240:99084542:-	GOLGA2P5	0.55	0.62	0.6	0.51	0.4	0.35	0.59	0.42	0.62	0.51	0.55	0.35	down
chr13:110356381:110356472:-@chr13:110353824:110353887:-@chr13:110351369:110351425:-@chr13:110343040:110343611:-	ANKRD10	0.39	0.77	0.7	0.24	0.33	0.26	0.62	0.276667	0.77	0.33	0.39	0.24	down
chr13:113192983:113193269:-@chr13:113186509|113186512:113186156:-	DCUN1D2	0.62	0.76	0.86	0.5	0.6	0.61	0.746667	0.57	0.86	0.61	0.62	0.5	down
chr13:26144009:26144126:+@chr13:26148686:26148861:+@chr13:26152172:26152338:+@chr13:26153191:26153457:+	WASF3	0.82	0.83	0.89	0.48	0.79	0.76	0.846667	0.676667	0.89	0.79	0.82	0.48	down
chr13:30089198:30090193:+@chr13:30093210:30093358:+@chr13:30093901:30094029:+	USPL1	0.83	0.74	0.73	0.71	0.37	0.46	0.766667	0.513333	0.83	0.71	0.73	0.37	down
chr13:49540234:49540300:-@chr13:49516788:49516905:-@chr13:49498430:49499543:-	MIR16-1,DLEU2,MIR15A	0.75	0.44	0.53	0.4	0.36	0.12	0.573333	0.293333	0.75	0.4	0.44	0.12	down
chr13:96797059:96797322:+@chr13:96807051:96807104:+@chr13:96807737:96809540:+	MBNL2	0.36	0.23	0.34	0.21	0.17	0.21	0.31	0.196667	0.36	0.21	0.23	0.17	down
chr13:98650681:98651194:+@chr13:98651684:98651822:+@chr13:98681689:98681768:+@chr13:98688682:98689197:+	UBAC2	0.86	0.9	0.9	0.69	0.64	0.62	0.886667	0.65	0.9	0.69	0.86	0.62	down
chr14:104251585:104252238:+@chr14:104252666:104252722:+@chr14:104256177:104256994:+	INF2	0.82	0.91	0.86	0.69	0.78	0.71	0.863333	0.726667	0.91	0.78	0.82	0.69	down
chr14:19997439:19997389|19997387:-@chr14:19995852:19997295:-	TMEM55B	0.83	0.84	0.77	0.57	0.45	0.37	0.813333	0.463333	0.84	0.57	0.77	0.37	down
chr14:22445244:22445417:-@chr14:22444651:22444708:-@chr14:22444385:22444502:-	RBM23	0.63	0.68	0.51	0.47	0.49	0.46	0.606667	0.473333	0.68	0.49	0.51	0.46	down
chr14:22445244:22445417:-@chr14:22444655:22444708:-@chr14:22444385:22444502:-	RBM23	0.79	0.86	0.79	0.7	0.64	0.68	0.813333	0.673333	0.86	0.7	0.79	0.64	down
chr14:23810533:23810784:-@chr14:23810159:23810294:-@chr14:23809883:23809993:-	RABGGTA	0.81	0.76	0.87	0.73	0.6	0.74	0.813333	0.69	0.87	0.74	0.76	0.6	down
chr14:23831230:23831830:-@chr14:23830265|23830671:23830185:-	DHRS1	0.72	0.65	0.59	0.42	0.38	0.54	0.653333	0.446667	0.72	0.54	0.59	0.38	down
chr14:34849697:34849856|34849846:+@chr14:34851838:34852016:+	PSMA6,KIAA0391	0.77	0.81	0.8	0.34	0.65	0.5	0.793333	0.496667	0.81	0.65	0.77	0.34	down
chr14:34849697:34849856|34849849:+@chr14:34851838:34852016:+	PSMA6,KIAA0391	0.69	0.66	0.66	0.46	0.48	0.38	0.67	0.44	0.69	0.48	0.66	0.38	down
chr14:50164499:50164930:+@chr14:50166463:50166477:+@chr14:50168697:50170047:+	ATL1	0.44	0.44	0.51	0.38	0.4	0.25	0.463333	0.343333	0.51	0.4	0.44	0.25	down
chr14:54687270:54687319:-@chr14:54685065:54685155:-@chr14:54684583:54684944:-	DLGAP5	0.38	0.36	0.43	0.17	0.23	0.2	0.39	0.2	0.43	0.23	0.36	0.17	down
chr14:55216036:55216156:+@chr14:55217157:55217212:+@chr14:55220570:55221990:+	KTN1	0.28	0.18	0.16	0.14	0.09	0.07	0.206667	0.1	0.28	0.14	0.16	0.07	down
chr14:57834426:57834610:-@chr14:57830237:57832282:-@chr14:57828106:57828178:-	PSMA3-AS1,C14orf37	0.29	0.23	0.13	0.12	0.11	0.1	0.216667	0.11	0.29	0.12	0.13	0.1	down
chr14:57834426:57834610:-@chr14:57830237:57832282:-@chr14:57829785:57830015:-@chr14:57828106:57828178:-	PSMA3-AS1,C14orf37	0.82	0.83	0.69	0.49	0.55	0.57	0.78	0.536667	0.83	0.57	0.69	0.49	down
chr14:61273360:61273580:+@chr14:61276976|61277014:61277098:+	HIF1A	0.24	0.34	0.27	0.22	0.12	0.14	0.283333	0.16	0.34	0.22	0.24	0.12	down
chr14:72818820:72818966:-@chr14:72815742:72815885:-@chr14:72811568:72813754:-	NUMB,LOC101928143	0.66	0.67	0.72	0.57	0.5	0.6	0.683333	0.556667	0.72	0.6	0.66	0.5	down
chr14:73423074:73423371:+@chr14:73424729:73424820:+@chr14:73428483:73428664:+	PTGR2,ZNF410	0.28	0.13	0.15	0.1	0.07	0.06	0.186667	0.0766667	0.28	0.1	0.13	0.06	down
chr14:73839331:73839520:-@chr14:73836004:73836131:-@chr14:73834095:73834525:-	ABCD4	0.83	0.83	0.72	0.68	0.57	0.55	0.793333	0.6	0.83	0.68	0.72	0.55	down
chr14:74251328:74251399:+@chr14:74252407|74252450:74252555:+	FCF1	0.84	0.89	0.89	0.64	0.71	0.79	0.873333	0.713333	0.89	0.79	0.84	0.64	down
chr14:88145364:88145500:+@chr14:88145809|88145812:88145900:+	ZC3H14	0.71	0.8	0.73	0.59	0.39	0.52	0.746667	0.5	0.8	0.59	0.71	0.39	down
chr14:90735854:90736002:+@chr14:90740803:90740964:+@chr14:90751502:90751890:+	C14orf159	0.85	0.77	0.74	0.52	0.73	0.69	0.786667	0.646667	0.85	0.73	0.74	0.52	down
chr14:91575644:91576570:-@chr14:91569347|91569350:91569289:-	TRIP11	0.86	0.88	0.9	0.81	0.65	0.81	0.88	0.756667	0.9	0.81	0.86	0.65	down
chr14:99016818:99016996:-@chr14:99001899|99001903:99001793:-	SETD3	0.91	0.9	0.96	0.78	0.7	0.89	0.923333	0.79	0.96	0.89	0.9	0.7	down
chr15:34659104:34659454:+@chr15:34723771:34723816:+@chr15:34724716:34724780:+	C15orf41	0.95	0.91	0.92	0.86	0.71	0.89	0.926667	0.82	0.95	0.89	0.91	0.71	down
chr15:39139357:39139416:-@chr15:39138129:39138271:-@chr15:39136112:39136196:-	INO80	0.86	0.86	0.9	0.71	0.73	0.85	0.873333	0.763333	0.9	0.85	0.86	0.71	down
chr15:55330651:55330913:+@chr15:55331911:55331982:+@chr15:55332752:55332958:+	TCF12	0.57	0.47	0.54	0.35	0.38	0.4	0.526667	0.376667	0.57	0.4	0.47	0.35	down
chr15:67239964:67240150:+@chr15:67273829:67273918:+@chr15:67275808:67276860:+	GLCE	0.51	0.59	0.66	0.33	0.31	0.36	0.586667	0.333333	0.66	0.36	0.51	0.31	down
chr15:69973074:69973173:-@chr15:69972360:69972575:-@chr15:69967399:69967511:-	MYO9A	0.76	0.79	0.75	0.7	0.53	0.67	0.766667	0.633333	0.79	0.7	0.75	0.53	down
chr15:79017190:79017375:+@chr15:79021245:79021449:+@chr15:79021647:79021733:+	CEMIP	0.76	0.74	0.92	0.54	0.57	0.68	0.806667	0.596667	0.92	0.68	0.74	0.54	down
chr15:88609899:88610112:+@chr15:88610524|88610602:88610634:+	NGRN	0.84	0.79	0.77	0.67	0.62	0.6	0.8	0.63	0.84	0.67	0.77	0.6	down
chr15:90495184:90495248:+@chr15:90497731:90497855:+@chr15:90506990:90510141:+	SLCO3A1	0.5	0.38	0.38	0.29	0.25	0.09	0.42	0.21	0.5	0.29	0.38	0.09	down
chr16:20821309:20821540:+@chr16:20830006:20830087:+@chr16:20834379:20834885:+	LYRM1	0.34	0.28	0.31	0.2	0.18	0.1	0.31	0.16	0.34	0.2	0.28	0.1	down
chr16:22216189:22216359:+@chr16:22221753:22221826:+@chr16:22223978:22224028:+	POLR3E,LOC101060521	0.88	0.9	0.94	0.83	0.64	0.86	0.906667	0.776667	0.94	0.86	0.88	0.64	down
chr16:29380551:29380772:+@chr16:29381515:29381607:+@chr16:29382167:29383162:+	SULT1A4,LOC105369243,SLX1B-SULT1A4	0.25	0.2	0.29	0.11	0.15	0.05	0.246667	0.103333	0.29	0.15	0.2	0.05	down
chr16:4243649:4243791:-@chr16:4241324:4242036:-@chr16:4238254:4238430:-@chr16:4235827:4237063:-	LINC01569	0.82	0.72	0.78	0.57	0.65	0.69	0.773333	0.636667	0.82	0.69	0.72	0.57	down
chr16:4663500:4663659:+@chr16:4667465:4667574:+@chr16:4671552:4671778:+	MGRN1	0.96	0.94	0.98	0.84	0.78	0.88	0.96	0.833333	0.98	0.88	0.94	0.78	down
chr16:55105862:55106093:-@chr16:55102693|55102697:55102572:-	BBS2	0.76	0.66	0.63	0.45	0.52	0.42	0.683333	0.463333	0.76	0.52	0.63	0.42	down
chr16:56047917:56048063|56048039:+@chr16:56048344:56052683:+	COQ9	0.82	0.82	0.84	0.55	0.44	0.74	0.826667	0.576667	0.84	0.74	0.82	0.44	down
chr16:65422251:65422394:-@chr16:65419384:65419546:-@chr16:65418864:65418968:-@chr16:65418072:65418184:-	NAE1	0.37	0.55	0.31	0.2	0.19	0.26	0.41	0.216667	0.55	0.26	0.31	0.19	down
chr16:65534052:65534189|65534141:+@chr16:65534703:65535662:+	CES2	0.76	0.76	0.76	0.63	0.61	0.69	0.76	0.643333	0.76	0.69	0.76	0.61	down
chr16:671794:671904:+@chr16:672021:672077:+	STUB1,MSLN	0.86	0.87	0.92	0.7	0.8	0.82	0.883333	0.773333	0.92	0.82	0.86	0.7	down
chr16:69100635:69100792:-@chr16:69099810:69099868:-	COG4	0.34	0.31	0.48	0.21	0.23	0.29	0.376667	0.243333	0.48	0.29	0.31	0.21	down
chr16:70607024:70608506:+@chr16:70613762:70613881:+@chr16:70614565:70614730:+	DHODH	0.82	0.76	0.75	0.43	0.48	0.29	0.776667	0.4	0.82	0.48	0.75	0.29	down
chr16:715795:715881:-@chr16:715447:715581:-@chr16:712584:715294:-	CCDC78	0.6	0.6	0.64	0.45	0.44	0.46	0.613333	0.45	0.64	0.46	0.6	0.44	down
chr16:80755300:80755221|80755188:-@chr16:80741948:80742620:-	MPHOSPH6	0.88	0.93	0.92	0.83	0.66	0.87	0.91	0.786667	0.93	0.87	0.88	0.66	down
chr16:87452528:87452698|87452661:+@chr16:87453572:87455010:+	TRAPPC2L	0.83	0.87	0.83	0.75	0.63	0.8	0.843333	0.726667	0.87	0.8	0.83	0.63	down
chr16:88171448:88171630:+@chr16:88172766:88172905:+@chr16:88177353:88177437:+	CPNE7	0.68	0.71	0.71	0.52	0.67	0.56	0.7	0.583333	0.71	0.67	0.68	0.52	down
chr16:88393141:88393081|88393075:-@chr16:88392265:88392988:-	FANCA	0.9	0.89	0.93	0.6	0.76	0.87	0.906667	0.743333	0.93	0.87	0.89	0.6	down
chr17:12846621:12846488|12846480:-@chr17:12846316:12846401:-	ELAC2	0.67	0.64	0.65	0.53	0.45	0.25	0.653333	0.41	0.67	0.53	0.64	0.25	down
chr17:15830839:15830931:-@chr17:15825079:15825183:-@chr17:15820213:15822202:-	ZSWIM7	0.89	0.87	0.92	0.78	0.75	0.82	0.893333	0.783333	0.92	0.82	0.87	0.75	down
chr17:1890262:1890649:+@chr17:1891147:1891225:+@chr17:1891525:1891665:+	DPH1	0.94	0.96	0.93	0.83	0.74	0.9	0.943333	0.823333	0.96	0.9	0.93	0.74	down
chr17:19173467:19173553:+@chr17:19175759:19175974:+@chr17:19179311:19180621:+	EPN2	0.81	0.84	0.88	0.72	0.76	0.68	0.843333	0.72	0.88	0.76	0.81	0.68	down
chr17:22645233:22645588:+@chr17:22652920|22652971:22653109:+	WSB1	0.65	0.54	0.56	0.47	0.26	0.51	0.583333	0.413333	0.65	0.51	0.54	0.26	down
chr17:23686493:23686641:-@chr17:23683299:23683535:-@chr17:23681482:23683140:-	IFT20	0.55	0.54	0.55	0.46	0.5	0.31	0.546667	0.423333	0.55	0.5	0.54	0.31	down
chr17:31943385:31943461:-@chr17:31942614:31942735:-@chr17:31941210:31941407:-		0.34	0.3	0.29	0.24	0.14	0.16	0.31	0.18	0.34	0.24	0.29	0.14	down
chr17:33018869:33018980:-@chr17:33013341:33013643:-@chr17:33011591:33011824:-		0.83	0.66	0.78	0.42	0.57	0.62	0.756667	0.536667	0.83	0.62	0.66	0.42	down
chr17:40923801:40923962:-@chr17:40915586:40915674:-@chr17:40907493:40908875:-	PLEKHM1,MIR4315-2,MIR4315-1	0.59	0.51	0.5	0.26	0.34	0.36	0.533333	0.32	0.59	0.36	0.5	0.26	down
chr17:42488825:42489118:-@chr17:42486483:42486578:-@chr17:42465600:42465746:-		0.69	0.62	0.65	0.35	0.37	0.32	0.653333	0.346667	0.69	0.37	0.62	0.32	down
chr17:4736220:4736305:+@chr17:4736473:4736583:+@chr17:4736727:4736839:+	MINK1	0.91	0.91	0.88	0.81	0.62	0.86	0.9	0.763333	0.91	0.86	0.88	0.62	down
chr17:4955819:4956370:-@chr17:4955095:4955238:-@chr17:4952945:4953887:-	ZNF232	0.69	0.68	0.73	0.6	0.24	0.67	0.7	0.503333	0.73	0.67	0.68	0.24	down
chr17:52410467:52410595:+@chr17:52413477:52413590:+@chr17:52417738:52417832:+	SCPEP1	0.9	0.88	0.91	0.79	0.73	0.84	0.896667	0.786667	0.91	0.84	0.88	0.73	down
chr17:59259950:59261593:+@chr17:59262012:59262027:+@chr17:59262128:59262318:+	PSMC5	0.93	0.86	0.86	0.83	0.79	0.48	0.883333	0.7	0.93	0.83	0.86	0.48	down
chr17:63798822:63799105:-@chr17:63790733:63790859:-@chr17:63785825:63786063:-	SLC16A6	0.42	0.26	0.28	0.24	0.17	0.24	0.32	0.216667	0.42	0.24	0.26	0.17	down
chr17:70279952:70280011:-@chr17:70279694:70279773:-	NAT9	0.74	0.73	0.8	0.62	0.59	0.71	0.756667	0.64	0.8	0.71	0.73	0.59	down
chr17:70279952:70280011:-@chr17:70279694:70279785:-	NAT9	0.78	0.83	0.84	0.74	0.53	0.74	0.816667	0.67	0.84	0.74	0.78	0.53	down
chr17:70751123:70751246:-@chr17:70750739:70750934:-@chr17:70750507:70750587:-	GGA3	0.83	0.77	0.82	0.53	0.66	0.76	0.806667	0.65	0.83	0.76	0.77	0.53	down
chr17:70797030:70797638:-@chr17:70796064:70796137:-@chr17:70794309:70794478:-	SLC25A19	0.65	0.77	0.73	0.57	0.58	0.62	0.716667	0.59	0.77	0.62	0.65	0.57	down
chr17:7104864:7106386:-@chr17:7104681:7104769:-@chr17:7102740:7104579:-	CLDN7	0.97	0.97	0.99	0.85	0.79	0.92	0.976667	0.853333	0.99	0.92	0.97	0.79	down
chr17:7430734:7430819:+@chr17:7430941:7431313:+	MPDU1	0.38	0.5	0.41	0.27	0.36	0.35	0.43	0.326667	0.5	0.36	0.38	0.27	down
chr17:77587709:77587928:-@chr17:77587356:77587613:-	DCXR	0.4	0.41	0.33	0.25	0.31	0.26	0.38	0.273333	0.41	0.31	0.33	0.25	down
chr17:77603030:77603129:+@chr17:77603421|77603424:77603624:+	GPS1	0.69	0.71	0.85	0.6	0.63	0.67	0.75	0.633333	0.85	0.67	0.69	0.6	down
chr17:8110277:8110396:+@chr17:8110544|8110796:8110941:+	PFAS	0.17	0.25	0.22	0.12	0.11	0.1	0.213333	0.11	0.25	0.12	0.17	0.1	down
chr18:17237831:17237953:+@chr18:17268906:17269034:+@chr18:17273480:17273596:+	GREB1L	0.62	0.63	0.75	0.47	0.43	0.44	0.666667	0.446667	0.75	0.47	0.62	0.43	down
chr18:31077114:31077255:+@chr18:31088194:31088364:+@chr18:31091890:31097204:+	ZNF397	0.39	0.5	0.36	0.32	0.32	0.3	0.416667	0.313333	0.5	0.32	0.36	0.3	down
chr18:31972057:31972387:+@chr18:31972756:31972833:+@chr18:31975098:31975162:+	ELP2	0.92	0.96	0.95	0.9	0.78	0.78	0.943333	0.82	0.96	0.9	0.92	0.78	down
chr18:53549857:53550062:-@chr18:53524720:53524817:-@chr18:53522785:53522898:-	ATP8B1	0.91	0.86	0.96	0.79	0.68	0.85	0.91	0.773333	0.96	0.85	0.86	0.68	down
chr19:10256459:10256708|10256685:+@chr19:10256791:10259082:+	ICAM4,ICAM1	0.57	0.65	0.54	0.43	0.39	0.52	0.586667	0.446667	0.65	0.52	0.54	0.39	down
chr19:10683837:10683975:+@chr19:10684229:10684304:+	QTRT1	0.8	0.84	0.85	0.41	0.65	0.72	0.83	0.593333	0.85	0.72	0.8	0.41	down
chr19:13733305:13733386|13733382:+@chr19:13734113:13734819:+	CCDC130	0.34	0.56	0.41	0.15	0.26	0.27	0.436667	0.226667	0.56	0.27	0.34	0.15	down
chr19:1566685:1567237:-@chr19:1566284:1566519:-@chr19:1563206:1563429:-@chr19:1560289:1562848:-	TCF3	0.56	0.56	0.56	0.51	0.42	0.45	0.56	0.46	0.56	0.51	0.56	0.42	down
chr19:16472603:16473362:+@chr19:16474876:16475191:+@chr19:16478512:16478585:+	C19orf44	0.88	0.82	0.89	0.73	0.61	0.77	0.863333	0.703333	0.89	0.77	0.82	0.61	down
chr19:16631206:16631258:-@chr19:16630969:16631066:-@chr19:16625150:16625936:-	SMIM7	0.47	0.47	0.43	0.19	0.33	0.15	0.456667	0.223333	0.47	0.33	0.43	0.15	down
chr19:17275051:17275282:-@chr19:17273992:17274041:-@chr19:17272262:17273433:-	ABHD8	0.23	0.31	0.16	0.15	0.14	0.06	0.233333	0.116667	0.31	0.15	0.16	0.06	down
chr19:19005940:19006047:+@chr19:19014520|19014525:19014686:+	ARMC6	0.84	0.83	0.92	0.69	0.59	0.7	0.863333	0.66	0.92	0.7	0.83	0.59	down
chr19:19104466:19104563:-@chr19:19104161:19104242:-	TMEM161A	0.64	0.66	0.82	0.46	0.59	0.52	0.706667	0.523333	0.82	0.59	0.64	0.46	down
chr19:19600237:19600739:-@chr19:19599901:19600022:-@chr19:19598853:19599313:-	LPAR2	0.92	0.93	0.87	0.79	0.61	0.84	0.906667	0.746667	0.93	0.84	0.87	0.61	down
chr19:21379920:21380498:+@chr19:21388108:21388150:+@chr19:21397555:21402460:+	ZNF493	0.53	0.51	0.63	0.31	0.21	0.38	0.556667	0.3	0.63	0.38	0.51	0.21	down
chr19:2184995:2185060:-@chr19:2184153:2184904:-	PLEKHJ1,MIR6789	0.74	0.77	0.68	0.55	0.49	0.65	0.73	0.563333	0.77	0.65	0.68	0.49	down
chr19:41397344:41397938:+@chr19:41400864:41400937:+@chr19:41408696:41408863:+	ZNF146	0.79	0.7	0.79	0.2	0.56	0.62	0.76	0.46	0.79	0.62	0.7	0.2	down
chr19:43587999:43588115:+@chr19:43591231:43591563:+	FAM98C	0.35	0.47	0.54	0.22	0.21	0.23	0.453333	0.22	0.54	0.23	0.35	0.21	down
chr19:4446816:4447402:+@chr19:4447916|4448955:4449028:+	HDGFRP2	0.41	0.39	0.3	0.28	0.21	0.14	0.366667	0.21	0.41	0.28	0.3	0.14	down
chr19:44571345:44571242|44571238:-@chr19:44571040:44571156:-	PAF1	0.44	0.24	0.25	0.23	0.12	0.22	0.31	0.19	0.44	0.23	0.24	0.12	down
chr19:50086357:50086411:+@chr19:50086504:50086786:+	TOMM40	0.67	0.56	0.58	0.52	0.28	0.37	0.603333	0.39	0.67	0.52	0.56	0.28	down
chr19:52950417:52950592:+@chr19:52950825|52951597:52951673:+	SNORD23,GLTSCR2	0.74	0.82	0.9	0.73	0.69	0.71	0.82	0.71	0.9	0.73	0.74	0.69	down
chr19:531379:531396:+@chr19:531663:531782:+	BSG	0.77	0.7	0.66	0.29	0.6	0.41	0.71	0.433333	0.77	0.6	0.66	0.29	down
chr19:53520394:53520679:+@chr19:53522590:53522733:+@chr19:53524421:53524561:+	EMP3	0.81	0.9	0.91	0.78	0.73	0.79	0.873333	0.766667	0.91	0.79	0.81	0.73	down
chr19:53558360:53558742:-@chr19:53555141:53555245:-@chr19:53540229:53540423:-	TMEM143	0.73	0.72	0.73	0.36	0.61	0.54	0.726667	0.503333	0.73	0.61	0.72	0.36	down
chr19:53558360:53558742:-@chr19:53555141:53555252:-@chr19:53540229:53540423:-	TMEM143	0.7	0.6	0.69	0.26	0.48	0.47	0.663333	0.403333	0.7	0.48	0.6	0.26	down
chr19:54006053:54006272:-@chr19:54003302|54003305:54002825:-	BCAT2	0.78	0.83	0.79	0.66	0.57	0.77	0.8	0.666667	0.83	0.77	0.78	0.57	down
chr19:54188561:54188992:+@chr19:54189245:54189410:+@chr19:54189574:54190002:+@chr19:54194388:54194442:+	RUVBL2	0.75	0.79	0.81	0.55	0.56	0.72	0.783333	0.61	0.81	0.72	0.75	0.55	down
chr19:54642896:54643131:-@chr19:54642489|54642536:54642407:-	PIH1D1	0.9	0.88	0.91	0.85	0.71	0.8	0.896667	0.786667	0.91	0.85	0.88	0.71	down
chr19:54692263:54692437|54692396:+@chr19:54692589:54693115:+	SNORD35B,RPS11	0.54	0.37	0.46	0.09	0.33	0.19	0.456667	0.203333	0.54	0.33	0.37	0.09	down
chr19:55706186:55706424:-@chr19:55705355:55705514:-@chr19:55701447:55701641:-	JOSD2	0.84	0.81	0.88	0.74	0.6	0.8	0.843333	0.713333	0.88	0.8	0.81	0.6	down
chr19:5599027:5599054:+@chr19:5600000:5600510:+@chr19:5600937:5600986:+	SAFB	0.66	0.66	0.65	0.51	0.57	0.55	0.656667	0.543333	0.66	0.57	0.65	0.51	down
chr19:55997286:55997719:-@chr19:55994027|55994426:55993963:-	SNORD88C,SNORD88B,C19orf48,SNORD88A	0.89	0.89	0.91	0.72	0.79	0.7	0.896667	0.736667	0.91	0.79	0.89	0.7	down
chr19:56196166:56196243:-@chr19:56192819:56192952:-@chr19:56190956:56191282:-	KLK8,KLK9	0.85	0.93	0.88	0.78	0.82	0.73	0.886667	0.776667	0.93	0.82	0.85	0.73	down
chr19:59301930:59302097|59302089:+@chr19:59303559:59303845:+	NDUFA3	0.41	0.43	0.36	0.35	0.28	0.13	0.4	0.253333	0.43	0.35	0.36	0.13	down
chr19:59310602:59310989:+@chr19:59313433|59313440:59313647:+	PRPF31	0.88	0.86	0.83	0.8	0.64	0.76	0.856667	0.733333	0.88	0.8	0.83	0.64	down
chr19:59396526:59396573:+@chr19:59396840|59396846:59396961:+	RPS9	0.74	0.64	0.75	0.55	0.58	0.51	0.71	0.546667	0.75	0.58	0.64	0.51	down
chr19:63022906:63023125:+@chr19:63042203:63042329:+@chr19:63059284:63059413:+	ZNF587	0.55	0.73	0.57	0.4	0.27	0.39	0.616667	0.353333	0.73	0.4	0.55	0.27	down
chr19:63386208:63386621:+@chr19:63390126:63390221:+@chr19:63409899:63410380:+	ZNF274	0.74	0.8	0.79	0.65	0.64	0.72	0.776667	0.67	0.8	0.72	0.74	0.64	down
chr19:63677048:63679375:+@chr19:63679619:63679683:+@chr19:63680358:63681376:+	ZNF446	0.57	0.4	0.37	0.28	0.29	0.33	0.446667	0.3	0.57	0.33	0.37	0.28	down
chr19:851829:852235:-@chr19:851144|851146:851061:-	R3HDM4	0.87	0.84	0.9	0.67	0.63	0.82	0.87	0.706667	0.9	0.82	0.84	0.63	down
chr19:9406784:9407233:-@chr19:9405344:9405462:-@chr19:9391667:9391894:-	ZNF266	0.57	0.47	0.57	0.43	0.38	0.25	0.536667	0.353333	0.57	0.43	0.47	0.25	down
chr19:9790221:9790765:-@chr19:9786015|9786018:9785814:-	FBXL12	0.59	0.67	0.59	0.57	0.46	0.52	0.616667	0.516667	0.67	0.57	0.59	0.46	down
chr1:101233254:101233992:-@chr1:101230781:101230898:-@chr1:101227767:101228775:-	DPH5	0.9	0.94	0.88	0.64	0.83	0.85	0.906667	0.773333	0.94	0.85	0.88	0.64	down
chr1:1016715:1017417:-@chr1:1015671|1016617:1015596:-	C1orf159	0.83	0.8	0.83	0.73	0.65	0.62	0.82	0.666667	0.83	0.73	0.8	0.62	down
chr1:109307506:109307693:-@chr1:109306454:109306614:-@chr1:109294454:109294593:-	CLCC1,AKNAD1	0.69	0.85	0.68	0.64	0.61	0.53	0.74	0.593333	0.85	0.64	0.68	0.53	down
chr1:110002959:110003255:+@chr1:110003935:110004104:+@chr1:110005310:110005853:+	GSTM4	0.17	0.32	0.2	0.08	0.15	0.05	0.23	0.0933333	0.32	0.15	0.17	0.05	down
chr1:110393257:110393383:+@chr1:110394488:110394554:+	STRIP1	0.59	0.63	0.59	0.57	0.48	0.45	0.603333	0.5	0.63	0.57	0.59	0.45	down
chr1:11718728:11718879:+@chr1:11728447:11728481:+@chr1:11730084:11730189:+	AGTRAP	0.9	0.89	0.97	0.82	0.74	0.86	0.92	0.806667	0.97	0.86	0.89	0.74	down
chr1:11770032:11770691:+@chr1:11770793|11770887:11771022:+	C1orf167	0.52	0.67	0.64	0.37	0.4	0.44	0.61	0.403333	0.67	0.44	0.52	0.37	down
chr1:11770032:11770691:+@chr1:11770808|11770887:11771022:+	C1orf167	0.36	0.5	0.68	0.33	0.35	0.3	0.513333	0.326667	0.68	0.35	0.36	0.3	down
chr1:1193105:1193235:-@chr1:1191341:1191533:-@chr1:1188096:1188629:-	UBE2J2	0.41	0.34	0.22	0.18	0.17	0.13	0.323333	0.16	0.41	0.18	0.22	0.13	down
chr1:11964454:11964497:+@chr1:11964614:11964758:+	MFN2	0.74	0.79	0.74	0.52	0.73	0.61	0.756667	0.62	0.79	0.73	0.74	0.52	down
chr1:147882389:147882735|147882575:+@chr1:147883170:147883410:+		0.84	0.85	0.87	0.76	0.6	0.69	0.853333	0.683333	0.87	0.76	0.84	0.6	down
chr1:150001213:150001255:-@chr1:149999916:149999999:-@chr1:149998743:149999281:-	MRPL9	0.94	0.94	0.94	0.88	0.78	0.85	0.94	0.836667	0.94	0.88	0.94	0.78	down
chr1:151867221:151867339:-@chr1:151865633|151866698:151865420:-	S100A13	0.63	0.58	0.71	0.55	0.21	0.36	0.64	0.373333	0.71	0.55	0.58	0.21	down
chr1:153455263:153455471:-@chr1:153454803:153454894:-@chr1:153453655:153454464:-	GBAP1	0.64	0.69	0.69	0.41	0.52	0.63	0.673333	0.52	0.69	0.63	0.64	0.41	down
chr1:153545327:153546620:+@chr1:153548670:153548694:+@chr1:153554356:153554436:+	FDPS	0.91	0.88	0.87	0.82	0.66	0.86	0.886667	0.78	0.91	0.86	0.87	0.66	down
chr1:153556026:153556103:+@chr1:153556272:153556343:+@chr1:153556824:153557085:+	FDPS	0.85	0.75	0.87	0.65	0.56	0.73	0.823333	0.646667	0.87	0.73	0.75	0.56	down
chr1:154153914:154154087:-@chr1:154153124|154153152:154153040:-	KIAA0907	0.72	0.77	0.92	0.35	0.57	0.63	0.803333	0.516667	0.92	0.63	0.72	0.35	down
chr1:155192836:155192982:-@chr1:155192215|155192218:155192119:-	ARHGEF11	0.14	0.31	0.23	0.09	0.11	0.08	0.226667	0.0933333	0.31	0.11	0.14	0.08	down
chr1:160826737:160826925:+@chr1:160829146:160829196:+@chr1:160834206:160834272:+	UAP1	0.87	0.76	0.86	0.39	0.51	0.61	0.83	0.503333	0.87	0.61	0.76	0.39	down
chr1:160826737:160826925:+@chr1:160829149:160829196:+@chr1:160834206:160834272:+	UAP1	0.65	0.69	0.83	0.23	0.44	0.37	0.723333	0.346667	0.83	0.44	0.65	0.23	down
chr1:16143382:16143682:-@chr1:16142890:16142977:-@chr1:16142681:16142797:-	ZBTB17	0.92	0.91	0.9	0.83	0.7	0.89	0.91	0.806667	0.92	0.89	0.9	0.7	down
chr1:1667023:1667540:-@chr1:1665550:1665967:-@chr1:1660535:1661003:-	SLC35E2	0.44	0.29	0.41	0.21	0.27	0.27	0.38	0.25	0.44	0.27	0.29	0.21	down
chr1:201311328:201311508:+@chr1:201312092:201314486:+	PPFIA4	0.62	0.8	0.59	0.58	0.4	0.56	0.67	0.513333	0.8	0.58	0.59	0.4	down
chr1:202921071:202921489:-@chr1:202918621:202918748:-@chr1:202868895:202868997:-@chr1:202852914:202855969:-	LRRN2	0.36	0.32	0.37	0.29	0.15	0.18	0.35	0.206667	0.37	0.29	0.32	0.15	down
chr1:211291211:211291474:+@chr1:211310971:211311006:+@chr1:211317661:211317781:+	RPS6KC1	0.84	0.89	0.9	0.72	0.7	0.77	0.876667	0.73	0.9	0.77	0.84	0.7	down
chr1:2114274:2114144|2113946:-@chr1:2110846:2111080:-	FAAP20	0.56	0.62	0.74	0.54	0.25	0.34	0.64	0.376667	0.74	0.54	0.56	0.25	down
chr1:21168554:21168676:-@chr1:21149188|21149191:21149083:-	EIF4G3	0.71	0.67	0.72	0.58	0.48	0.25	0.7	0.436667	0.72	0.58	0.67	0.25	down
chr1:26024368:26025904:+@chr1:26028623|26028696:26028908:+	MTFR1L	0.84	0.83	0.77	0.72	0.69	0.72	0.813333	0.71	0.84	0.72	0.77	0.69	down
chr1:29264056:29264257:+@chr1:29295254:29295703:+@chr1:29296906:29297034:+	EPB41	0.15	0.18	0.21	0.05	0.11	0.06	0.18	0.0733333	0.21	0.11	0.15	0.05	down
chr1:32453861:32455539:-@chr1:32453404|32453736:32453324:-	TMEM234	0.49	0.77	0.53	0.48	0.34	0.38	0.596667	0.4	0.77	0.48	0.49	0.34	down
chr1:32888621:32889200:-@chr1:32871833:32871915:-@chr1:32865696:32865732:-	ZBTB8OS	0.69	0.7	0.77	0.36	0.68	0.48	0.72	0.506667	0.77	0.68	0.69	0.36	down
chr1:35792538:35792707:-@chr1:35744800:35745323:-@chr1:35717154:35717400:-	KIAA0319L	0.97	0.91	0.91	0.86	0.78	0.85	0.93	0.83	0.97	0.86	0.91	0.78	down
chr1:36623911:36624111:-@chr1:36596925:36597010:-@chr1:36596427:36596570:-	STK40	0.82	0.86	0.85	0.73	0.48	0.72	0.843333	0.643333	0.86	0.73	0.82	0.48	down
chr1:36700276:36700351:-@chr1:36699452:36699500:-@chr1:36694375:36698964:-	MRPS15	0.94	0.92	0.96	0.7	0.53	0.87	0.94	0.7	0.96	0.87	0.92	0.53	down
chr1:40086245:40086566:-@chr1:40085807:40085915:-@chr1:40085303:40085556:-	TRIT1	0.86	0.92	0.86	0.66	0.7	0.84	0.88	0.733333	0.92	0.84	0.86	0.66	down
chr1:40769504:40770046:+@chr1:40771402:40771440:+@chr1:40778845:40778971:+	ZNF684	0.77	0.71	0.88	0.66	0.53	0.68	0.786667	0.623333	0.88	0.68	0.71	0.53	down
chr1:54422422:54424547:-@chr1:54417410:54417613:-@chr1:54407621:54413083:-	CYB5RL	0.96	0.92	0.94	0.84	0.8	0.87	0.94	0.836667	0.96	0.87	0.92	0.8	down
chr1:62228428:62228624:+@chr1:62256116:62256207:+@chr1:62276237:62276309:+	PATJ	0.91	0.89	0.9	0.77	0.69	0.88	0.9	0.78	0.91	0.88	0.89	0.69	down
chr1:68722221:68722361:-@chr1:68720912:68721168:-@chr1:68719711:68719883:-	DEPDC1	0.71	0.57	0.63	0.51	0.51	0.51	0.636667	0.51	0.71	0.51	0.57	0.51	down
chr1:76028225:76028330:+@chr1:76028425:76028547:+	RABGGTB	0.71	0.77	0.72	0.48	0.69	0.67	0.733333	0.613333	0.77	0.69	0.71	0.48	down
chr1:84120940:84121119:-@chr1:84118164:84118254:-@chr1:84103295:84108353:-	TTLL7	0.4	0.35	0.37	0.33	0.31	0.17	0.373333	0.27	0.4	0.33	0.35	0.17	down
chr1:886872:886993|886972:+@chr1:887069:887729:+	KLHL17	0.94	0.95	0.97	0.93	0.66	0.88	0.953333	0.823333	0.97	0.93	0.94	0.66	down
chr1:95472294:95472459:+@chr1:95477921:95478053:+@chr1:95482355:95484801:+	RWDD3	0.47	0.66	0.52	0.37	0.32	0.41	0.55	0.366667	0.66	0.41	0.47	0.32	down
chr1:95482355:95482859|95482842:+@chr1:95484686:95484801:+	RWDD3	0.54	0.52	0.62	0.45	0.15	0.28	0.56	0.293333	0.62	0.45	0.52	0.15	down
chr20:25147186:25147250:+@chr20:25149868:25149969:+@chr20:25151474:25151614:+	ENTPD6	0.83	0.88	0.88	0.76	0.74	0.77	0.863333	0.756667	0.88	0.77	0.83	0.74	down
chr20:2592571:2592651:-@chr20:2592212|2592404:2592092:-	IDH3B	0.86	0.83	0.86	0.75	0.69	0.76	0.85	0.733333	0.86	0.76	0.83	0.69	down
chr20:2768435:2769270:-@chr20:2767912|2767917:2767838:-	PCED1A	0.75	0.84	0.83	0.56	0.54	0.63	0.806667	0.576667	0.84	0.63	0.75	0.54	down
chr20:30755952:30755903|30755899:-@chr20:30754166:30755534:-	COMMD7	0.43	0.5	0.57	0.32	0.41	0.29	0.5	0.34	0.57	0.41	0.43	0.29	down
chr20:31452895:31453374:-@chr20:31443602:31443709:-@chr20:31438786:31439000:-	CDK5RAP1	0.8	0.91	0.86	0.76	0.64	0.74	0.856667	0.713333	0.91	0.76	0.8	0.64	down
chr20:34263608:34263712:+@chr20:34265693:34265776:+@chr20:34270212:34270298:+	EPB41L1	0.7	0.78	0.78	0.58	0.63	0.68	0.753333	0.63	0.78	0.68	0.7	0.58	down
chr20:42998692:42998785:+@chr20:43000116:43000246:+@chr20:43020392:43021211:+	PABPC1L	0.78	0.75	0.79	0.58	0.69	0.71	0.773333	0.66	0.79	0.71	0.75	0.58	down
chr20:45283372:45283532:-@chr20:45274694:45274777:-@chr20:45271266:45272949:-	ZMYND8	0.9	0.93	0.86	0.73	0.67	0.64	0.896667	0.68	0.93	0.73	0.86	0.64	down
chr20:47208883:47209090:-@chr20:47208381:47208441:-@chr20:47203877:47204015:-	STAU1	0.65	0.6	0.58	0.48	0.54	0.39	0.61	0.47	0.65	0.54	0.58	0.39	down
chr20:49072814:49073082:-@chr20:49063788|49063793:49063673:-	KCNG1	0.59	0.42	0.62	0.32	0.4	0.31	0.543333	0.343333	0.62	0.4	0.42	0.31	down
chr20:60205904:60205978|60205969:+@chr20:60206303:60207084:+	MTG2	0.59	0.47	0.6	0.44	0.45	0.33	0.553333	0.406667	0.6	0.45	0.47	0.33	down
chr20:61835383:61835535|61835508:+@chr20:61836501:61836954:+	ZGPAT	0.92	0.85	0.91	0.72	0.7	0.82	0.893333	0.746667	0.92	0.82	0.85	0.7	down
chr21:37366604:37367285:-@chr21:37363722:37363794:-@chr21:37361432:37361550:-	PIGP	0.74	0.77	0.89	0.61	0.55	0.68	0.8	0.613333	0.89	0.68	0.74	0.55	down
chr21:37561409:37562294:-@chr21:37527533:37527613:-@chr21:37526516:37526622:-	DSCR3	0.67	0.69	0.76	0.51	0.45	0.36	0.706667	0.44	0.76	0.51	0.67	0.36	down
chr21:44581960:44581978:-@chr21:44581135:44581231:-@chr21:44578372:44580115:-	C21orf2	0.5	0.38	0.44	0.28	0.19	0.3	0.44	0.256667	0.5	0.3	0.38	0.19	down
chr21:45511933:45512056:-@chr21:45508280:45509978:-	POFUT2	0.38	0.42	0.47	0.31	0.28	0.36	0.423333	0.316667	0.47	0.36	0.38	0.28	down
chr22:18222183:18222339:-@chr22:18221966:18222062:-	C22orf29,GNB1L	0.8	0.76	0.78	0.74	0.61	0.65	0.78	0.666667	0.8	0.74	0.76	0.61	down
chr22:19679159:19679315:+@chr22:19680035|19680052:19680161:+	LZTR1	0.94	0.94	0.96	0.88	0.75	0.86	0.946667	0.83	0.96	0.88	0.94	0.75	down
chr22:20379226:20379359:+@chr22:20379687:20379785:+	PPIL2	0.3	0.45	0.49	0.26	0.2	0.2	0.413333	0.22	0.49	0.26	0.3	0.2	down
chr22:20379226:20379363:+@chr22:20379683:20379785:+	PPIL2	0.31	0.45	0.3	0.23	0.23	0.19	0.353333	0.216667	0.45	0.23	0.3	0.19	down
chr22:28407428:28407590:+@chr22:28409009:28409053:+@chr22:28420741:28424593:+	NF2	0.86	0.8	0.74	0.53	0.61	0.58	0.8	0.573333	0.86	0.61	0.74	0.53	down
chr22:28407428:28407590:+@chr22:28409009:28409068:+@chr22:28420741:28424593:+	NF2	0.57	0.38	0.31	0.2	0.22	0.27	0.42	0.23	0.57	0.27	0.31	0.2	down
chr22:28558234:28558569:-@chr22:28551611:28551696:-@chr22:28551076:28551246:-	ASCC2	0.88	0.95	0.91	0.87	0.64	0.8	0.913333	0.77	0.95	0.87	0.88	0.64	down
chr22:29821289:29821441:+@chr22:29821520:29822883:+	SMTN,MTMR3	0.4	0.29	0.33	0.25	0.17	0.21	0.34	0.21	0.4	0.25	0.29	0.17	down
chr22:35916851:35916914:-@chr22:35914149:35914462:-@chr22:35911078:35911441:-	C1QTNF6	0.74	0.85	0.75	0.61	0.55	0.58	0.78	0.58	0.85	0.61	0.74	0.55	down
chr22:37024737:37025155:-@chr22:37021339:37021399:-@chr22:37017891:37020486:-	CSNK1E,LOC400927-CSNK1E	0.65	0.54	0.56	0.47	0.38	0.33	0.583333	0.393333	0.65	0.47	0.54	0.33	down
chr22:40266649:40266745:-@chr22:40258609:40258695:-@chr22:40258044:40258107:-	POLR3H	0.89	0.86	0.89	0.79	0.69	0.83	0.88	0.77	0.89	0.83	0.86	0.69	down
chr22:43505218:43506365:+@chr22:43506795:43506935:+@chr22:43511316:43512231:+	ARHGAP8,ARHGAP8,PRR5-ARHGAP8,PRR5	0.9	0.87	0.93	0.71	0.65	0.62	0.9	0.66	0.93	0.71	0.87	0.62	down
chr22:43945533:43945697|43945654:+@chr22:43946145:43947152:+	NUP50	0.68	0.67	0.37	0.29	0.33	0.24	0.573333	0.286667	0.68	0.33	0.37	0.24	down
chr22:43945533:43945697|43945688:+@chr22:43946145:43947152:+	NUP50	0.75	0.71	0.6	0.39	0.42	0.3	0.686667	0.37	0.75	0.42	0.6	0.3	down
chr22:43945533:43945720|43945654:+@chr22:43946145:43947152:+	NUP50	0.66	0.67	0.51	0.3	0.43	0.21	0.613333	0.313333	0.67	0.43	0.51	0.21	down
chr22:43945533:43945720|43945688:+@chr22:43946145:43947152:+	NUP50	0.78	0.74	0.64	0.53	0.44	0.29	0.72	0.42	0.78	0.53	0.64	0.29	down
chr2:101841890:101841976:+@chr2:101842540|101842630:101842758:+	MAP4K4	0.66	0.4	0.55	0.32	0.28	0.35	0.536667	0.316667	0.66	0.35	0.4	0.28	down
chr2:102747220:102747318:+@chr2:102780754:102780891:+@chr2:102797639:102801301:+	TMEM182	0.8	0.85	0.93	0.73	0.71	0.77	0.86	0.736667	0.93	0.77	0.8	0.71	down
chr2:112994330:112994473:+@chr2:112995270:112995389:+@chr2:113002729:113007196:+	TTL	0.35	0.37	0.39	0.25	0.28	0.25	0.37	0.26	0.39	0.28	0.35	0.25	down
chr2:130631294:130633384:-@chr2:130630669|130630856:130630628:-	SMPD4	0.73	0.79	0.84	0.58	0.47	0.69	0.786667	0.58	0.84	0.69	0.73	0.47	down
chr2:131971253:131971336:+@chr2:131972910:131972996:+@chr2:131974247:131974393:+	LOC150776	0.79	0.74	0.77	0.63	0.73	0.59	0.766667	0.65	0.79	0.73	0.74	0.59	down
chr2:161058046:161058744:-@chr2:160932145|160932148:160931973:-	RBMS1,MIR4785	0.88	0.88	0.8	0.59	0.74	0.75	0.853333	0.693333	0.88	0.75	0.8	0.59	down
chr2:171895315:171895454:-@chr2:171890798:171890904:-@chr2:171890597:171890662:-	METTL8	0.91	0.91	0.95	0.69	0.82	0.87	0.923333	0.793333	0.95	0.87	0.91	0.69	down
chr2:173070949:173071074:+@chr2:173074746:173074875:+@chr2:173077065:173079433:+	ITGA6	0.8	0.87	0.85	0.65	0.78	0.62	0.84	0.683333	0.87	0.78	0.8	0.62	down
chr2:190325820:190325950:-@chr2:190325624:190325695:-@chr2:190323505:190323627:-	OSGEPL1	0.84	0.88	0.87	0.6	0.83	0.77	0.863333	0.733333	0.88	0.83	0.84	0.6	down
chr2:215955180:215955293:-@chr2:215952098:215952285:-	FN1	0.24	0.26	0.35	0.07	0.16	0.09	0.283333	0.106667	0.35	0.16	0.24	0.07	down
chr2:219231732:219232140:+@chr2:219233274:219233449:+@chr2:219233906:219234487:+	BCS1L	0.46	0.34	0.3	0.24	0.17	0.27	0.366667	0.226667	0.46	0.27	0.3	0.17	down
chr2:219818862:219819051:+@chr2:219819684:219819842:+	STK16	0.56	0.45	0.5	0.38	0.37	0.43	0.503333	0.393333	0.56	0.43	0.45	0.37	down
chr2:224160:224272:-@chr2:223097:223229:-@chr2:219966:221191:-	SH3YL1	0.84	0.78	0.94	0.58	0.68	0.68	0.853333	0.646667	0.94	0.68	0.78	0.58	down
chr2:224160:224272:-@chr2:223101:223229:-@chr2:219966:221191:-	SH3YL1	0.89	0.94	0.96	0.67	0.83	0.85	0.93	0.783333	0.96	0.85	0.89	0.67	down
chr2:227913252:227913340:+@chr2:227915705:227915779:+@chr2:227920186:227923801:+	MFF	0.64	0.74	0.53	0.35	0.36	0.38	0.636667	0.363333	0.74	0.38	0.53	0.35	down
chr2:238763352:238763239|238763233:-@chr2:238761511:238761637:-	ILKAP	0.91	0.89	0.92	0.67	0.8	0.86	0.906667	0.776667	0.92	0.86	0.89	0.67	down
chr2:238763352:238763243|238763233:-@chr2:238761511:238761637:-	ILKAP	0.91	0.85	0.92	0.75	0.83	0.79	0.893333	0.79	0.92	0.83	0.85	0.75	down
chr2:241857383:241857289|241857042:-@chr2:241856565:241856629:-	HDLBP	0.85	0.79	0.84	0.78	0.67	0.69	0.826667	0.713333	0.85	0.78	0.79	0.67	down
chr2:242273895:242273965:-@chr2:242268313:242268407:-@chr2:242266540:242266737:-	DTYMK	0.88	0.78	0.79	0.76	0.72	0.64	0.816667	0.706667	0.88	0.76	0.78	0.64	down
chr2:73815064:73815226:-@chr2:73813215:73813335:-@chr2:73811822:73812920:-	TPRKB	0.29	0.22	0.2	0.12	0.14	0.11	0.236667	0.123333	0.29	0.14	0.2	0.11	down
chr2:74027354:74027541:+@chr2:74031236|74031356:74031367:+	DGUOK	0.79	0.86	0.84	0.76	0.68	0.72	0.83	0.72	0.86	0.76	0.79	0.68	down
chr2:74563957:74564045:+@chr2:74570660:74570762:+@chr2:74570879:74571819:+	TTC31	0.88	0.83	0.88	0.79	0.52	0.76	0.863333	0.69	0.88	0.79	0.83	0.52	down
chr2:74563957:74564198|74564045:+@chr2:74570879:74571819:+	TTC31	0.78	0.64	0.43	0.16	0.24	0.18	0.616667	0.193333	0.78	0.24	0.43	0.16	down
chr2:74607883:74607998:-@chr2:74607576:74607756:-	AUP1	0.21	0.35	0.28	0.17	0.12	0.18	0.28	0.156667	0.35	0.18	0.21	0.12	down
chr2:74610225:74610547:+@chr2:74611080:74611147:+@chr2:74611252:74611456:+	HTRA2	0.88	0.89	0.84	0.63	0.64	0.81	0.87	0.693333	0.89	0.81	0.84	0.63	down
chr2:74610225:74610547:+@chr2:74611096:74611147:+@chr2:74611252:74611456:+	HTRA2	0.85	0.89	0.85	0.58	0.4	0.8	0.863333	0.593333	0.89	0.8	0.85	0.4	down
chr2:85435027:85435463:+@chr2:85436189:85436530:+@chr2:85437601:85438376:+	ELMOD3	0.88	0.92	0.92	0.78	0.72	0.8	0.906667	0.766667	0.92	0.8	0.88	0.72	down
chr2:95186823:95186911:-@chr2:95184834:95185129:-@chr2:95182605:95182731:-	ZNF514	0.66	0.72	0.78	0.57	0.51	0.54	0.72	0.54	0.78	0.57	0.66	0.51	down
chr3:120700105:120700479:+@chr3:120702232|120702239:120702397:+	TIMMDC1	0.76	0.83	0.91	0.75	0.39	0.72	0.833333	0.62	0.91	0.75	0.76	0.39	down
chr3:126414234:126414398:-@chr3:126412833:126412928:-@chr3:126391909:126392055:-	SLC12A8	0.94	0.9	0.9	0.76	0.79	0.84	0.913333	0.796667	0.94	0.84	0.9	0.76	down
chr3:127269480:127269779:-@chr3:127235140:127235211:-@chr3:127227836:127228012:-	SLC41A3	0.85	0.9	0.8	0.67	0.73	0.64	0.85	0.68	0.9	0.73	0.8	0.64	down
chr3:130109718:130109797:+@chr3:130110506:130110632:+	ACAD9	0.32	0.29	0.31	0.07	0.24	0.27	0.306667	0.193333	0.32	0.27	0.29	0.07	down
chr3:130600541:130600972:-@chr3:130598573:130598673:-@chr3:130594752:130595328:-	SNORA7B,RPL32P3	0.65	0.75	0.66	0.47	0.61	0.52	0.686667	0.533333	0.75	0.61	0.65	0.47	down
chr3:131034307:131034359:-@chr3:131029610|131030041:131029336:-	TMCC1	0.81	0.86	0.85	0.72	0.58	0.79	0.84	0.696667	0.86	0.79	0.81	0.58	down
chr3:137458087:137458155:+@chr3:137463484:137463597:+@chr3:137485369:137485479:+	PCCB	0.83	0.88	0.88	0.74	0.53	0.82	0.863333	0.696667	0.88	0.82	0.83	0.53	down
chr3:140780404:140780587:-@chr3:140775130:140775212:-@chr3:140761712:140762924:-	NMNAT3	0.89	0.81	0.94	0.6	0.66	0.73	0.88	0.663333	0.94	0.73	0.81	0.6	down
chr3:153645761:153646018:+@chr3:153647183:153647236:+@chr3:153648099:153648252:+	MBNL1	0.55	0.54	0.6	0.43	0.52	0.44	0.563333	0.463333	0.6	0.52	0.54	0.43	down
chr3:171177415:171177533:+@chr3:171183119|171183142:171183393:+	SEC62	0.44	0.36	0.38	0.35	0.35	0.17	0.393333	0.29	0.44	0.35	0.36	0.17	down
chr3:185188252:185188399:-@chr3:185185786:185185860:-@chr3:185184235:185185376:-	ABCC5	0.83	0.83	0.81	0.25	0.48	0.59	0.823333	0.44	0.83	0.59	0.81	0.25	down
chr3:185386989:185387357:+@chr3:185388146:185388243:+@chr3:185388343:185388465:+	ABCF3,EIF2B5	0.81	0.89	0.95	0.75	0.7	0.8	0.883333	0.75	0.95	0.8	0.81	0.7	down
chr3:185515657:185516027:+@chr3:185516245:185516338:+@chr3:185517803:185517979:+@chr3:185518199:185518298:+	EIF4G1,EIF2B5	0.81	0.83	0.81	0.6	0.7	0.78	0.816667	0.693333	0.83	0.78	0.81	0.6	down
chr3:187988264:187988365:+@chr3:187988793:187988899:+@chr3:187989608:187990761:+	EIF4A2,MIR1248	0.5	0.57	0.41	0.35	0.39	0.3	0.493333	0.346667	0.57	0.39	0.41	0.3	down
chr3:187988264:187988365:+@chr3:187988793:187988903:+@chr3:187989608:187990761:+	EIF4A2,MIR1248	0.51	0.63	0.49	0.43	0.45	0.39	0.543333	0.423333	0.63	0.45	0.49	0.39	down
chr3:192570402:192570519:+@chr3:192575545:192576072:+@chr3:192580642:192580757:+	CCDC50	0.21	0.29	0.23	0.11	0.11	0.15	0.243333	0.123333	0.29	0.15	0.21	0.11	down
chr3:27735082:27735388:-@chr3:27734246|27734303:27732872:-	EOMES	0.85	0.78	0.91	0.62	0.71	0.67	0.846667	0.666667	0.91	0.71	0.78	0.62	down
chr3:42585361:42585569:-@chr3:42580384|42580476:42580261:-	SEC22C	0.7	0.8	0.71	0.6	0.55	0.48	0.736667	0.543333	0.8	0.6	0.7	0.48	down
chr3:47298634:47299340:-@chr3:47297446:47297689:-@chr3:47293588:47293873:-	KIF9	0.82	0.78	0.7	0.64	0.58	0.55	0.766667	0.59	0.82	0.64	0.7	0.55	down
chr3:47298989:47299613:-@chr3:47293869|47293873:47293776:-	KIF9	0.71	0.71	0.74	0.54	0.59	0.55	0.72	0.56	0.74	0.59	0.71	0.54	down
chr3:49028595:49028777:-@chr3:49028410:49028517:-	DALRD3	0.79	0.79	0.75	0.28	0.74	0.63	0.776667	0.55	0.79	0.74	0.75	0.28	down
chr3:49724916:49725329|49725093:+@chr3:49725950:49726024:+	RNF123	0.5	0.4	0.34	0.16	0.32	0.22	0.413333	0.233333	0.5	0.32	0.34	0.16	down
chr3:50112969:50115603:+@chr3:50116685:50116745:+@chr3:50117514:50117579:+	RBM5	0.79	0.93	0.93	0.69	0.51	0.68	0.883333	0.626667	0.93	0.69	0.79	0.51	down
chr3:50352991:50353385:-@chr3:50350446|50350458:50350340:-	RASSF1	0.32	0.45	0.24	0.17	0.21	0.21	0.336667	0.196667	0.45	0.21	0.24	0.17	down
chr3:51980868:51980948:-@chr3:51980516:51980754:-	PCBP4,,ABHD14B	0.91	0.9	0.93	0.83	0.78	0.76	0.913333	0.79	0.93	0.83	0.9	0.76	down
chr3:52296885:52296932:+@chr3:52299360:52299775:+@chr3:52300016:52300978:+	GLYCTK	0.66	0.7	0.63	0.52	0.38	0.61	0.663333	0.503333	0.7	0.61	0.63	0.38	down
chr3:56568637:56568662:+@chr3:56569930:56570080:+@chr3:56570325:56570446:+@chr3:56572752:56573499:+	CCDC66	0.5	0.5	0.48	0.46	0.35	0.19	0.493333	0.333333	0.5	0.46	0.48	0.19	down
chr3:58099049:58099296:+@chr3:58102625:58102663:+@chr3:58103417:58103519:+	FLNB	0.92	0.92	0.88	0.6	0.65	0.61	0.906667	0.62	0.92	0.65	0.88	0.6	down
chr3:58099049:58099296:+@chr3:58102625:58102696:+@chr3:58103417:58103519:+	FLNB	0.95	0.96	0.93	0.75	0.75	0.74	0.946667	0.746667	0.96	0.75	0.93	0.74	down
chr3:58293657:58293857:+@chr3:58330198:58330245:+@chr3:58343281:58343467:+	PXK	0.83	0.83	0.77	0.65	0.56	0.54	0.81	0.583333	0.83	0.65	0.77	0.54	down
chr3:9773451:9773500:+@chr3:9775918:9775970:+@chr3:9782493:9783421:+	OGG1	0.44	0.37	0.35	0.27	0.32	0.15	0.386667	0.246667	0.44	0.32	0.35	0.15	down
chr4:114490833:114490854:+@chr4:114493650:114499904:+@chr4:114501428:114501502:+	ANK2	0.55	0.61	0.65	0.45	0.48	0.49	0.603333	0.473333	0.65	0.49	0.55	0.45	down
chr4:152820415:152820579:-@chr4:152813364:152813498:-@chr4:152811060:152811904:-	GATB	0.93	0.93	0.95	0.71	0.91	0.87	0.936667	0.83	0.95	0.91	0.93	0.71	down
chr4:170620969:170621121:-@chr4:170595809:170595985:-@chr4:170591271:170591391:-	NEK1	0.73	0.84	0.74	0.56	0.55	0.44	0.77	0.516667	0.84	0.56	0.73	0.44	down
chr4:184074686:184074555|184074433:-@chr4:184073608:184073722:-	DCTD	0.73	0.71	0.69	0.66	0.56	0.56	0.71	0.593333	0.73	0.66	0.69	0.56	down
chr4:189255209:189255309:-@chr4:189250935:189251170:-@chr4:189249420:189250089:-	TRIML2	0.16	0.15	0.26	0.08	0.06	0.09	0.19	0.0766667	0.26	0.09	0.15	0.06	down
chr4:2213576:2213689:-@chr4:2213315|2213362:2213045:-	HAUS3,POLN	0.44	0.38	0.43	0.28	0.32	0.35	0.416667	0.316667	0.44	0.35	0.38	0.28	down
chr4:2904631:2904734:-@chr4:2904258|2904320:2904125:-	MFSD10	0.73	0.8	0.84	0.68	0.68	0.49	0.79	0.616667	0.84	0.68	0.73	0.49	down
chr4:39138805:39138977:+@chr4:39140211:39140304:+@chr4:39141540:39142458:+	LIAS	0.84	0.92	0.92	0.67	0.82	0.81	0.893333	0.766667	0.92	0.82	0.84	0.67	down
chr4:7053696:7053879:+@chr4:7059260:7059354:+@chr4:7063281:7063409:+	TBC1D14	0.89	0.71	0.82	0.63	0.63	0.56	0.806667	0.606667	0.89	0.63	0.71	0.56	down
chr4:76933867:76934078:+@chr4:76935513:76935533:+@chr4:76939799:76939909:+	USO1	0.24	0.25	0.28	0.12	0.13	0.05	0.256667	0.1	0.28	0.13	0.24	0.05	down
chr4:77258252:77258371:-@chr4:77257841:77257919:-	NUP54	0.2	0.42	0.23	0.14	0.14	0.17	0.283333	0.15	0.42	0.17	0.2	0.14	down
chr4:77411745:77411945:+@chr4:77418246:77418401:+@chr4:77430079:77430237:+@chr4:77449321:77451307:+	STBD1,FAM47E	0.53	0.46	0.57	0.33	0.42	0.36	0.52	0.37	0.57	0.42	0.46	0.33	down
chr4:85781015:85781167:+@chr4:85783201:85783320:+@chr4:85785399:85785502:+	CDS1	0.84	0.92	0.83	0.79	0.49	0.76	0.863333	0.68	0.92	0.79	0.83	0.49	down
chr5:137531522:137532276:-@chr5:137530106:137530198:-@chr5:137529416:137529696:-	BRD8	0.72	0.56	0.71	0.52	0.44	0.54	0.663333	0.5	0.72	0.54	0.56	0.44	down
chr5:137531522:137532276:-@chr5:137530106:137530315:-@chr5:137529416:137529696:-	BRD8	0.83	0.76	0.81	0.62	0.64	0.71	0.8	0.656667	0.83	0.71	0.76	0.62	down
chr5:139897855:139898030|139898003:+@chr5:139898688:139902050:+	ANKHD1,ANKHD1-EIF4EBP3	0.93	0.76	0.8	0.62	0.67	0.74	0.83	0.676667	0.93	0.74	0.76	0.62	down
chr5:139922268:139922127|139922118:-@chr5:139921356:139921996:-	APBB3,MIR6831	0.65	0.62	0.77	0.47	0.3	0.57	0.68	0.446667	0.77	0.57	0.62	0.3	down
chr5:140997877:140998611:+@chr5:140999215:140999400:+@chr5:140999671:141000816:+	RELL2	0.92	0.9	0.94	0.86	0.53	0.87	0.92	0.753333	0.94	0.87	0.9	0.53	down
chr5:141298270:141298509:+@chr5:141298601|141298605:141298653:+	KIAA0141	0.68	0.55	0.61	0.46	0.52	0.41	0.613333	0.463333	0.68	0.52	0.55	0.41	down
chr5:145597054:145597188:+@chr5:145611467:145611631:+@chr5:145614699:145614848:+	RBM27	0.75	0.8	0.8	0.71	0.66	0.65	0.783333	0.673333	0.8	0.71	0.75	0.65	down
chr5:148366637:148368454:-@chr5:148363482:148363598:-@chr5:148314429:148314641:-	SH3TC2	0.41	0.34	0.34	0.28	0.24	0.15	0.363333	0.223333	0.41	0.28	0.34	0.15	down
chr5:175320660:175320760:-@chr5:175319529:175319741:-@chr5:175277414:175277781:-	THOC3	0.88	0.97	0.88	0.76	0.85	0.81	0.91	0.806667	0.97	0.85	0.88	0.76	down
chr5:176330349:176330473:-@chr5:176329208:176329313:-@chr5:176317700:176317761:-	UIMC1	0.86	0.85	0.87	0.69	0.74	0.79	0.86	0.74	0.87	0.79	0.85	0.69	down
chr5:176852012:176852042:-@chr5:176851414:176851583:-@chr5:176850617:176851027:-	PDLIM7	0.91	0.83	0.88	0.79	0.69	0.74	0.873333	0.74	0.91	0.79	0.83	0.69	down
chr5:179200478:179200565:-@chr5:179196882:179197491:-	C5orf45	0.49	0.47	0.52	0.26	0.38	0.37	0.493333	0.336667	0.52	0.38	0.47	0.26	down
chr5:37099649:37099878|37099837:+@chr5:37100386:37102265:+	NIPBL	0.49	0.48	0.35	0.22	0.34	0.18	0.44	0.246667	0.49	0.34	0.35	0.18	down
chr5:56545658:56545777:+@chr5:56552960:56552980:+@chr5:56562430:56562574:+	GPBP1	0.33	0.4	0.3	0.08	0.17	0.26	0.343333	0.17	0.4	0.26	0.3	0.08	down
chr5:70870625:70870661:+@chr5:70871140:70871232:+@chr5:70873040:70873265:+	BDP1	0.85	0.79	0.82	0.77	0.66	0.71	0.82	0.713333	0.85	0.77	0.79	0.66	down
chr5:922360:922519:-@chr5:921722:921919:-@chr5:918529:918696:-	BRD9	0.67	0.64	0.6	0.42	0.43	0.35	0.636667	0.4	0.67	0.43	0.6	0.35	down
chr6:109522998:109523471:+@chr6:109573115:109573277:+@chr6:109574654:109574833:+	CEP57L1	0.9	0.87	0.88	0.83	0.68	0.64	0.883333	0.716667	0.9	0.83	0.87	0.64	down
chr6:109908971:109909950:-@chr6:109904659:109904826:-@chr6:109904071:109904154:-	ZBTB24	0.77	0.79	0.82	0.63	0.61	0.73	0.793333	0.656667	0.82	0.73	0.77	0.61	down
chr6:111634488:111634631:+@chr6:111646710:111646938:+@chr6:111649899:111651838:+	SLC16A10	0.92	0.95	0.98	0.69	0.9	0.89	0.95	0.826667	0.98	0.9	0.92	0.69	down
chr6:127689840:127689982:-@chr6:127679288:127679340:-@chr6:127677654:127677734:-	ECHDC1	0.83	0.93	0.9	0.71	0.77	0.79	0.886667	0.756667	0.93	0.79	0.83	0.71	down
chr6:161437720:161438198:+@chr6:161439300:161439449:+@chr6:161442914:161443014:+	MAP3K4	0.68	0.62	0.68	0.5	0.54	0.52	0.66	0.52	0.68	0.54	0.62	0.5	down
chr6:17392867:17392921:+@chr6:17399059:17399103:+@chr6:17399966:17402091:+	RBM24	0.21	0.15	0.12	0.04	0.09	0.03	0.16	0.0533333	0.21	0.09	0.12	0.03	down
chr6:17880118:17880269:-@chr6:17879324:17879428:-@chr6:17871903:17873156:-	KIF13A	0.69	0.84	0.76	0.58	0.63	0.61	0.763333	0.606667	0.84	0.63	0.69	0.58	down
chr6:20588056:20588167:+@chr6:20589416|20589434:20589635:+	E2F3	0.94	0.94	0.93	0.71	0.82	0.91	0.936667	0.813333	0.94	0.91	0.93	0.71	down
chr6:28411586:28411890:-@chr6:28405470|28405534:28405059:-	ZSCAN31	0.73	0.67	0.79	0.49	0.48	0.47	0.73	0.48	0.79	0.49	0.67	0.47	down
chr6:31633384:31633605|31633560:+@chr6:31633778:31634585:+	NFKBIL1	0.85	0.82	0.85	0.8	0.53	0.81	0.84	0.713333	0.85	0.81	0.82	0.53	down
chr6:31740597:31741964:-@chr6:31740333|31740336:31739609:-	GPANK1	0.84	0.68	0.67	0.43	0.61	0.56	0.73	0.533333	0.84	0.61	0.67	0.43	down
chr6:31910882:31911207:+@chr6:31912180:31912273:+@chr6:31912992:31913191:+	C6orf48,SNORD48,SNORD52	0.72	0.64	0.73	0.38	0.5	0.56	0.696667	0.48	0.73	0.56	0.64	0.38	down
chr6:31910882:31911207:+@chr6:31912180:31912277:+@chr6:31912992:31913191:+	C6orf48,SNORD48,SNORD52	0.57	0.4	0.49	0.26	0.32	0.28	0.486667	0.286667	0.57	0.32	0.4	0.26	down
chr6:31910882:31911207:+@chr6:31912180|31912183:31912273:+	C6orf48,SNORD48	0.78	0.75	0.85	0.45	0.69	0.62	0.793333	0.586667	0.85	0.69	0.75	0.45	down
chr6:34958687:34959683:-@chr6:34956103|34956131:34956044:-	TAF11	0.9	0.91	0.94	0.64	0.87	0.89	0.916667	0.8	0.94	0.89	0.9	0.64	down
chr6:39180122:39181530:-@chr6:39179857:39179974:-	SAYSD1	0.5	0.44	0.39	0.17	0.22	0.24	0.443333	0.21	0.5	0.24	0.39	0.17	down
chr6:41714176:41714541:+@chr6:41721842|41721847:41722024:+	MDFI	0.89	0.82	0.86	0.69	0.55	0.62	0.856667	0.62	0.89	0.69	0.82	0.55	down
chr6:43592443:43592706:-@chr6:43591903|43591906:43591605:-	YIPF3	0.46	0.42	0.26	0.24	0.2	0.22	0.38	0.22	0.46	0.24	0.26	0.2	down
chr6:52550064:52551150:+@chr6:52551259:52551351:+@chr6:52552132:52552366:+	TRAM2-AS1	0.54	0.55	0.65	0.5	0.42	0.52	0.58	0.48	0.65	0.52	0.54	0.42	down
chr6:88239357:88239456:+@chr6:88243799:88243980:+@chr6:88266945:88267104:+	CFAP206,SLC35A1	0.87	0.85	0.95	0.79	0.76	0.79	0.89	0.78	0.95	0.79	0.85	0.76	down
chr6:88272819:88272885|88272881:+@chr6:88274857:88275709:+	CFAP206,SLC35A1	0.79	0.9	0.9	0.77	0.65	0.67	0.863333	0.696667	0.9	0.77	0.79	0.65	down
chr7:102011740:102011860:-@chr7:102010522:102010590:-@chr7:102007041:102010414:-	POLR2J3,RASA4,LOC102724229,POLR2J2	0.44	0.56	0.43	0.33	0.37	0.24	0.476667	0.313333	0.56	0.37	0.43	0.24	down
chr7:139374882:139375447:-@chr7:139373545:139373675:-@chr7:139372466:139372617:-	PARP12	0.9	0.88	0.9	0.84	0.66	0.84	0.893333	0.78	0.9	0.84	0.88	0.66	down
chr7:1556285:1556360:-@chr7:1556016:1556107:-@chr7:1554681:1554850:-	TMEM184A	0.82	0.84	0.94	0.73	0.69	0.77	0.866667	0.73	0.94	0.77	0.82	0.69	down
chr7:30585147:30585269:-@chr7:30582705:30582851:-@chr7:30571657:30575130:-		0.37	0.42	0.53	0.32	0.32	0.18	0.44	0.273333	0.53	0.32	0.37	0.18	down
chr7:38221154:38221231:+@chr7:38223151:38223204:+@chr7:38223314:38223431:+	STARD3NL	0.87	0.89	0.91	0.72	0.77	0.85	0.89	0.78	0.91	0.85	0.87	0.72	down
chr7:44057954:44058070|44058066:+@chr7:44062881:44063027:+	DBNL,MIR6837	0.77	0.54	0.72	0.45	0.51	0.51	0.676667	0.49	0.77	0.51	0.54	0.45	down
chr7:44080654:44080522|44080255:-@chr7:44079907:44080149:-	POLM,MIR6838	0.85	0.77	0.75	0.66	0.66	0.61	0.79	0.643333	0.85	0.66	0.75	0.61	down
chr7:45073384:45074703:+@chr7:45078850:45078907:+@chr7:45079584:45079695:+	CCM2	0.78	0.8	0.76	0.66	0.7	0.57	0.78	0.643333	0.8	0.7	0.76	0.57	down
chr7:5196342:5196650:+@chr7:5199275:5199328:+@chr7:5205733:5205815:+	WIPI2	0.57	0.67	0.68	0.51	0.44	0.41	0.64	0.453333	0.68	0.51	0.57	0.41	down
chr7:56056260:56056418:-@chr7:56054787:56054995:-@chr7:56052399:56052566:-	PSPH	0.78	0.78	0.72	0.59	0.64	0.71	0.76	0.646667	0.78	0.71	0.72	0.59	down
chr7:56069148:56069656:-@chr7:56068568:56068681:-@chr7:56067116:56067241:-	PSPH	0.59	0.45	0.52	0.41	0.39	0.4	0.52	0.4	0.59	0.41	0.45	0.39	down
chr7:56109301:56109405:+@chr7:56109773:56109854:+@chr7:56113289:56113373:+@chr7:56113551:56113968:+	SUMF2	0.91	0.9	0.9	0.75	0.74	0.86	0.903333	0.783333	0.91	0.86	0.9	0.74	down
chr7:63892211:63892384:+@chr7:63912731:63912857:+@chr7:63929264:63932114:+	ZNF138	0.75	0.8	0.61	0.44	0.49	0.58	0.72	0.503333	0.8	0.58	0.61	0.44	down
chr7:72057143:72057283:-@chr7:72056773:72057072:-	NSUN5P1,NSUN5P2	0.92	0.91	0.96	0.74	0.85	0.8	0.93	0.796667	0.96	0.85	0.91	0.74	down
chr7:7572888:7573228:+@chr7:7574182:7574279:+@chr7:7578592:7579925:+	MIOS	0.72	0.73	0.78	0.59	0.49	0.61	0.743333	0.563333	0.78	0.61	0.72	0.49	down
chr7:97337026:97337061:-@chr7:97336335|97336353:97336156:-	ASNS	0.85	0.9	0.91	0.74	0.69	0.84	0.886667	0.756667	0.91	0.84	0.85	0.69	down
chr7:97437018:97437718:-@chr7:97436253:97436300:-@chr7:97433654:97434225:-		0.81	0.79	0.69	0.47	0.46	0.5	0.763333	0.476667	0.81	0.5	0.69	0.46	down
chr7:98996066:98996254:+@chr7:99007247:99007351:+@chr7:99007804:99012013:+	ZNF655	0.51	0.47	0.42	0.39	0.23	0.38	0.466667	0.333333	0.51	0.39	0.42	0.23	down
chr7:99554763:99554956:-@chr7:99554077:99554208:-@chr7:99551405:99551452:-@chr7:99549613:99549827:-	TAF6	0.43	0.69	0.42	0.36	0.34	0.41	0.513333	0.37	0.69	0.41	0.42	0.34	down
chr8:109551467:109551526:+@chr8:109558187:109558297:+@chr8:109567917:109569214:+	EMC2	0.82	0.78	0.82	0.51	0.69	0.72	0.806667	0.64	0.82	0.72	0.78	0.51	down
chr8:124190895:124191041:+@chr8:124201476:124201609:+@chr8:124207477:124207610:+	TBC1D31	0.88	0.89	0.86	0.57	0.83	0.82	0.876667	0.74	0.89	0.83	0.86	0.57	down
chr8:144721865:144722199:-@chr8:144721455:144721574:-@chr8:144720924:144721201:-	MROH6	0.86	0.9	0.82	0.58	0.63	0.72	0.86	0.643333	0.9	0.72	0.82	0.58	down
chr8:144734522:144734641:-@chr8:144734367:144734456:-	EEF1D	0.77	0.75	0.81	0.66	0.72	0.63	0.776667	0.67	0.81	0.72	0.75	0.63	down
chr8:144734554:144734641:-@chr8:144734367:144734467:-	EEF1D	0.73	0.69	0.81	0.55	0.68	0.67	0.743333	0.633333	0.81	0.68	0.69	0.55	down
chr8:145457267:145457166|145457156:-@chr8:145456588:145457081:-		0.84	0.75	0.85	0.69	0.74	0.67	0.813333	0.7	0.85	0.74	0.75	0.67	down
chr8:145551068:145551181:-@chr8:145550768:145550999:-	FBXL6	0.5	0.51	0.47	0.33	0.37	0.34	0.493333	0.346667	0.51	0.37	0.47	0.33	down
chr8:145551068:145551181:-@chr8:145550768:145551017:-	FBXL6	0.84	0.85	0.89	0.66	0.7	0.83	0.86	0.73	0.89	0.83	0.84	0.66	down
chr8:145714171:145714233:+@chr8:145714941:145715007:+@chr8:145715807:145716246:+	LRRC14	0.54	0.93	0.71	0.38	0.25	0.45	0.726667	0.36	0.93	0.45	0.54	0.25	down
chr8:1802099:1802179|1802175:+@chr8:1804767:1806707:+	ARHGEF10	0.44	0.66	0.26	0.2	0.25	0.13	0.453333	0.193333	0.66	0.25	0.26	0.13	down
chr8:38401184:38401374:-@chr8:38399700:38399850:-@chr8:38398472:38398616:-@chr8:38396208:38396410:-	FGFR1	0.26	0.22	0.25	0.09	0.16	0.16	0.243333	0.136667	0.26	0.16	0.22	0.09	down
chr8:64244500:64244524:+@chr8:64247766:64247911:+@chr8:64250444:64250813:+	YTHDF3	0.69	0.57	0.85	0.46	0.47	0.56	0.703333	0.496667	0.85	0.56	0.57	0.46	down
chr8:66744662:66744807:+@chr8:66757117:66757240:+@chr8:66768433:66768548:+	MTFR1	0.81	0.75	0.77	0.68	0.53	0.65	0.776667	0.62	0.81	0.68	0.75	0.53	down
chr8:95755712:95755910|95755898:+@chr8:95759607:95759775:+	ESRP1	0.87	0.89	0.86	0.72	0.64	0.8	0.873333	0.72	0.89	0.8	0.86	0.64	down
chr9:113372192:113372310:-@chr9:113366258:113366363:-@chr9:113364675:113365332:-	PTGR1	0.35	0.44	0.45	0.2	0.28	0.27	0.413333	0.25	0.45	0.28	0.35	0.2	down
chr9:123083569:123083661:+@chr9:123084538:123084649:+@chr9:123099865:123099941:+@chr9:123104062:123104266:+	GSN	0.35	0.33	0.41	0.23	0.19	0.07	0.363333	0.163333	0.41	0.23	0.33	0.07	down
chr9:123083569:123083661:+@chr9:123084538:123084649:+@chr9:123102201:123102225:+@chr9:123104062:123104266:+	GSN	0.19	0.27	0.16	0.07	0.14	0.02	0.206667	0.0766667	0.27	0.14	0.16	0.02	down
chr9:123083569:123083661:+@chr9:123088182:123088284:+@chr9:123102164:123102225:+@chr9:123104023:123104266:+	GSN	0.26	0.42	0.4	0.18	0.23	0.08	0.36	0.163333	0.42	0.23	0.26	0.08	down
chr9:123083569:123083661:+@chr9:123088182:123088284:+@chr9:123102201:123102225:+@chr9:123104062:123104266:+	GSN	0.32	0.4	0.38	0.17	0.14	0.12	0.366667	0.143333	0.4	0.17	0.32	0.12	down
chr9:125070536:125070738:-@chr9:125038930:125039066:-@chr9:124986232:124986398:-	STRBP	0.32	0.47	0.41	0.23	0.25	0.26	0.4	0.246667	0.47	0.26	0.32	0.23	down
chr9:125070536:125070738:-@chr9:125038930:125039069:-@chr9:124986232:124986398:-	STRBP	0.33	0.49	0.44	0.27	0.21	0.28	0.42	0.253333	0.49	0.28	0.33	0.21	down
chr9:130552889:130552722|130552716:-@chr9:130544630:130544845:-	ZER1	0.84	0.87	0.86	0.69	0.67	0.83	0.856667	0.73	0.87	0.83	0.84	0.67	down
chr9:131682213:131682389:+@chr9:131682567:131683928:+	USP20	0.56	0.43	0.38	0.23	0.29	0.37	0.456667	0.296667	0.56	0.37	0.38	0.23	down
chr9:133487004:133487206:-@chr9:133469169:133469261:-@chr9:133467269:133467357:-	RAPGEF1	0.44	0.2	0.17	0.06	0.06	0.03	0.27	0.05	0.44	0.06	0.17	0.03	down
chr9:133804589:133804682:-@chr9:133759093:133759200:-@chr9:133749266:133749307:-	MED27	0.77	0.79	0.84	0.69	0.66	0.75	0.8	0.7	0.84	0.75	0.77	0.66	down
chr9:139230172:139230290:+@chr9:139230367:139230461:+@chr9:139230545:139233644:+	NDOR1	0.86	0.84	0.86	0.83	0.57	0.7	0.853333	0.7	0.86	0.83	0.84	0.57	down
chr9:139627888:139627937:+@chr9:139628305:139628487:+	ARRDC1	0.81	0.82	0.82	0.72	0.72	0.65	0.816667	0.696667	0.82	0.72	0.81	0.65	down
chr9:32979757:32980089:-@chr9:32978090:32978127:-@chr9:32977542:32977729:-	APTX	0.59	0.48	0.44	0.32	0.38	0.34	0.503333	0.346667	0.59	0.38	0.44	0.32	down
chr9:3320259:3320517:-@chr9:3291546:3291620:-@chr9:3283077:3283258:-	RFX3	0.8	0.81	0.81	0.58	0.69	0.66	0.806667	0.643333	0.81	0.69	0.8	0.58	down
chr9:34604707:34607968:-@chr9:34604098|34604129:34604039:-	DCTN3	0.52	0.44	0.47	0.31	0.42	0.36	0.476667	0.363333	0.52	0.42	0.44	0.31	down
chr9:37844777:37844979:+@chr9:37847272:37847348:+@chr9:37850045:37850359:+	DCAF10	0.51	0.63	0.55	0.34	0.42	0.37	0.563333	0.376667	0.63	0.42	0.51	0.34	down
chr9:43855822:43855975|43855893:+@chr9:43860245:43862467:+	CNTNAP3B,LOC100289279	0.23	0.53	0.32	0.1	0.09	0.08	0.36	0.09	0.53	0.1	0.23	0.08	down
chr9:721158:721266:+@chr9:722378|724748:724835:+	KANK1	0.67	0.7	0.67	0.44	0.54	0.5	0.68	0.493333	0.7	0.54	0.67	0.44	down
chr9:88106011:88106336:-@chr9:88103934:88104007:-@chr9:88103502:88103565:-	ZCCHC6	0.85	0.84	0.8	0.71	0.77	0.39	0.83	0.623333	0.85	0.77	0.8	0.39	down
chr9:93019380:93019430:-@chr9:93018162:93018209:-@chr9:93015918:93016528:-	AUH	0.81	0.81	0.83	0.73	0.59	0.76	0.816667	0.693333	0.83	0.76	0.81	0.59	down
chr9:94031229:94031200|94031104:-@chr9:94025449:94025532:-	IARS	0.75	0.79	0.84	0.65	0.65	0.65	0.793333	0.65	0.84	0.65	0.75	0.65	down
chr9:94517356:94517566:-@chr9:94513466:94515564:-	BICD2	0.81	0.84	0.82	0.71	0.63	0.66	0.823333	0.666667	0.84	0.71	0.81	0.63	down
chr9:98720746:98720929:-@chr9:98705020:98705211:-@chr9:98699808:98700230:-		0.25	0.32	0.19	0.11	0.12	0.15	0.253333	0.126667	0.32	0.15	0.19	0.11	down
chr9:99487026:99487143:-@chr9:99484303:99484533:-@chr9:99477012:99477690:-	XPA	0.43	0.24	0.23	0.15	0.19	0.18	0.3	0.173333	0.43	0.19	0.23	0.15	down
chrX:101862541:101862611:+@chrX:101889401:101889495:+@chrX:101890283:101895129:+	BHLHB9	0.82	0.7	0.74	0.32	0.51	0.66	0.753333	0.496667	0.82	0.66	0.7	0.32	down
chrX:101862541:101862611:+@chrX:101889417:101889495:+@chrX:101890283:101895129:+	BHLHB9	0.76	0.8	0.77	0.49	0.34	0.43	0.776667	0.42	0.8	0.49	0.76	0.34	down
chrX:102826755:102828303:-@chrX:102826265:102826313:-@chrX:102820083:102820235:-	MORF4L2	0.51	0.46	0.36	0.34	0.31	0.31	0.443333	0.32	0.51	0.34	0.36	0.31	down
chrX:128537975:128538210:+@chrX:128546002:128546025:+@chrX:128548660:128548776:+	OCRL	0.55	0.43	0.41	0.36	0.24	0.34	0.463333	0.313333	0.55	0.36	0.41	0.24	down
chrX:133743517:133743613:-@chrX:133733839:133733979:-@chrX:133731262:133733050:-	FAM122B	0.38	0.34	0.46	0.18	0.22	0.27	0.393333	0.223333	0.46	0.27	0.34	0.18	down
chrX:152850963:152851078:-@chrX:152850718:152850762:-@chrX:152849410:152849494:-	NAA10,ARHGAP4	0.9	0.86	0.91	0.72	0.74	0.75	0.89	0.736667	0.91	0.75	0.86	0.72	down
chrX:153295013:153295098:+@chrX:153301076|153301565:153301627:+	TAZ	0.57	0.6	0.76	0.56	0.49	0.55	0.643333	0.533333	0.76	0.56	0.57	0.49	down
chrX:154772315:154772469|154772465:+@chrX:154780970:154781107:+	VAMP7	0.77	0.64	0.77	0.6	0.51	0.57	0.726667	0.56	0.77	0.6	0.64	0.51	down
chrX:46970308:46970370:+@chrX:46970926:46971046:+	CDK16	0.74	0.75	0.8	0.42	0.7	0.71	0.763333	0.61	0.8	0.71	0.74	0.42	down
chrX:62569096:62568988|62568969:-@chrX:62563163:62565586:-		0.88	0.9	0.86	0.75	0.59	0.81	0.88	0.716667	0.9	0.81	0.86	0.59	down
chrX:71631731:71631843:-@chrX:71627504:71627581:-@chrX:71625508:71625616:-	HDAC8	0.86	0.89	0.89	0.79	0.47	0.79	0.88	0.683333	0.89	0.79	0.86	0.47	down

## Sheet: SW480_AS_diffpsi0.1
Supplementary File 1c. List of alternative splicing targets between SW480 EpCAMlo and EpCAMhi subpopulation, filtered by ΔPSI > 0.1
event_name	symbol	psi_SW480_CD44highEpCAMhigh2_GTCCGC	psi_SW480_CD44highEpCAMhigh_GCCAAT	psi_SW480_CD44highEpCAMhigh_TGACCA	psi_SW480_CD44highEpCAMlow_ACAGTG	psi_SW480_CD44highEpCAMlow_CAGATC	psi_SW480_CD44highEpCAMlow_CTTGTA	psi_SW480_CD44highEpCAMlow_TGACCA	psi_mean_group1	psi_mean_group2	psi_max_group1	psi_max_group2	psi_min_group1	psi_min_group2	change_type
chr10:104848678:104848731:-@chr10:104847038:104847121:-	NT5C2	0.28	0.43	0.49	0.6	0.5	0.68	0.61	0.4	0.5975	0.49	0.68	0.28	0.5	up
chr10:105201903:105202152:-@chr10:105200929|105201032:105200830:-	CALHM2	0.55	0.47	0.52	0.72	0.61	0.66	0.57	0.513333	0.64	0.55	0.72	0.47	0.57	up
chr10:116034612:116034723|116034719:+@chr10:116035688:116036260:+	VWA2	0.08	0.11	0.18	0.2	0.23	0.45	0.25	0.123333	0.2825	0.18	0.45	0.08	0.2	up
chr10:116154189:116154536:-@chr10:116148600:116148653:-@chr10:116143233:116143327:-@chr10:116090352:116090480:-	AFAP1L2	0.11	0.13	0.16	0.38	0.31	0.32	0.29	0.133333	0.325	0.16	0.38	0.11	0.29	up
chr10:3175581:3176558:-@chr10:3172957|3173004:3172879:-	PITRM1	0.72	0.74	0.55	0.85	0.8	0.88	0.81	0.67	0.835	0.74	0.88	0.55	0.8	up
chr10:31789972:31790172:+@chr10:31824714:31824773:+@chr10:31831282:31831443:+	ZEB1	0.57	0.79	0.75	0.92	0.84	0.83	0.92	0.703333	0.8775	0.79	0.92	0.57	0.83	up
chr10:35455776:35456127:+@chr10:35477302:35477425:+@chr10:35507823:35507920:+	CREM	0.53	0.57	0.66	0.67	0.73	0.82	0.85	0.586667	0.7675	0.66	0.85	0.53	0.67	up
chr10:73703921:73704192|73704185:+@chr10:73704459:73705837:+	DDIT4	0.08	0.07	0.06	0.16	0.31	0.22	0.16	0.07	0.2125	0.08	0.31	0.06	0.16	up
chr10:79466958:79467068:+@chr10:79469968:79469989:+@chr10:79470379:79470511:+	RPS24	0.12	0.15	0.18	0.24	0.35	0.65	0.63	0.15	0.4675	0.18	0.65	0.12	0.24	up
chr10:95145889:95145971:-@chr10:95142664:95142702:-@chr10:95138777:95138901:-	MYOF	0.55	0.68	0.61	0.76	0.9	0.8	0.91	0.613333	0.8425	0.68	0.91	0.55	0.76	up
chr11:131285720:131286752:+@chr11:131521386:131521618:+@chr11:131587126:131587251:+	NTM	0.72	0.8	0.7	0.97	0.9	0.92	0.97	0.74	0.94	0.8	0.97	0.7	0.9	up
chr11:17856331:17856367:-@chr11:17824708:17824884:-@chr11:17766171:17766536:-	SERGEF	0.12	0.1	0.11	0.17	0.38	0.37	0.34	0.11	0.315	0.12	0.38	0.1	0.17	up
chr11:32081126:32081324|32081280:+@chr11:32081403:32081602:+	RCN1,DKFZp686K1684	0.14	0.05	0.11	0.15	0.27	0.17	0.31	0.1	0.225	0.14	0.31	0.05	0.15	up
chr11:35167785:35168188:+@chr11:35176244:35176369:+@chr11:35182635:35182763:+@chr11:35186228:35186329:+	CD44	0.17	0.29	0.24	0.76	0.68	0.59	0.55	0.233333	0.645	0.29	0.76	0.17	0.55	up
chr11:497113:497300:-@chr11:494996|495001:494824:-	RNH1	0.18	0.04	0.11	0.19	0.19	0.27	0.24	0.11	0.2225	0.18	0.27	0.04	0.19	up
chr11:57285810:57286094:+@chr11:57313085:57313203:+@chr11:57315433:57315721:+	CTNND1	0.7	0.43	0.42	0.74	0.77	0.77	0.8	0.516667	0.77	0.7	0.8	0.42	0.74	up
chr11:57285810:57286094:+@chr11:57315433:57315721:+@chr11:57318058:57318129:+	CTNND1	0.1	0.12	0.16	0.41	0.57	0.41	0.56	0.126667	0.4875	0.16	0.57	0.1	0.41	up
chr11:57285810:57286094:+@chr11:57315540:57315721:+@chr11:57318058:57318129:+	CTNND1	0.03	0.05	0.09	0.17	0.28	0.19	0.27	0.0566667	0.2275	0.09	0.28	0.03	0.17	up
chr11:57285810:57286094:+@chr11:57315542:57315721:+@chr11:57318058:57318129:+	CTNND1	0.03	0.05	0.09	0.17	0.25	0.19	0.26	0.0566667	0.2175	0.09	0.26	0.03	0.17	up
chr11:57285810:57286167:+@chr11:57315433|57315540:57315721:+	CTNND1	0.79	0.65	0.59	0.92	0.95	0.89	0.86	0.676667	0.905	0.79	0.95	0.59	0.86	up
chr11:66965172:66965291:-@chr11:66964486|66964531:66964382:-	CORO1B	0.07	0.05	0.04	0.15	0.45	0.09	0.26	0.0533333	0.2375	0.07	0.45	0.04	0.09	up
chr11:70867089:70867163:+@chr11:70868913:70868968:+@chr11:70869449:70870719:+	NADSYN1	0.21	0.15	0.19	0.27	0.56	0.34	0.24	0.183333	0.3525	0.21	0.56	0.15	0.24	up
chr11:71499238:71499297:-@chr11:71498919|71498955:71498782:-	ANAPC15	0.08	0.09	0.1	0.13	0.15	0.24	0.3	0.09	0.205	0.1	0.3	0.08	0.13	up
chr11:73109539:73109592:-@chr11:73107478:73107583:-@chr11:73107306:73107411:-@chr11:73104944:73105055:-	RAB6A	0.48	0.44	0.39	0.55	0.51	0.64	0.62	0.436667	0.58	0.48	0.64	0.39	0.51	up
chr12:100943883:100943947:-@chr12:100937186:100937280:-@chr12:100935231:100935714:-	CCDC53	0.19	0.2	0.23	0.44	0.28	0.48	0.33	0.206667	0.3825	0.23	0.48	0.19	0.28	up
chr12:108869444:108869692:-@chr12:108867448:108867537:-@chr12:108861353:108861435:-	GIT2	0.81	0.83	0.53	0.86	0.89	0.91	0.93	0.723333	0.8975	0.83	0.93	0.53	0.86	up
chr12:109424237:109424314:-@chr12:109421008:109421047:-@chr12:109418200:109419190:-	VPS29	0.27	0.27	0.33	0.43	0.35	0.39	0.46	0.29	0.4075	0.33	0.46	0.27	0.35	up
chr12:120218824:120218938:-@chr12:120215338:120215460:-@chr12:120198509:120198653:-@chr12:120196242:120196771:-	CAMKK2	0.24	0.07	0.21	0.25	0.41	0.37	0.37	0.173333	0.35	0.24	0.41	0.07	0.25	up
chr12:120725168:120725778:-@chr12:120724920:120725095:-@chr12:120723996:120724097:-	LINC01089	0.4	0.37	0.39	0.64	0.41	0.7	0.73	0.386667	0.62	0.4	0.73	0.37	0.41	up
chr12:121403226:121403286:-@chr12:121397875:121397979:-@chr12:121391253:121392197:-	CLIP1	0.09	0.07	0.09	0.28	0.42	0.27	0.25	0.0833333	0.305	0.09	0.42	0.07	0.25	up
chr12:123837002:123836856|123836606:-@chr12:123828127:123829085:-	SCARB1	0.06	0.09	0.12	0.18	0.28	0.19	0.14	0.09	0.1975	0.12	0.28	0.06	0.14	up
chr12:131030192:131030291:+@chr12:131031987:131032094:+@chr12:131032591:131033467:+	EP400	0.64	0.66	0.64	0.77	0.81	0.72	0.78	0.646667	0.77	0.66	0.81	0.64	0.72	up
chr12:31143988:31144908:+@chr12:31145200|31145246:31145331:+	DDX11	0.44	0.34	0.38	0.47	0.5	0.52	0.56	0.386667	0.5125	0.44	0.56	0.34	0.47	up
chr12:47866587:47866883:-@chr12:47866360:47866464:-	TUBA1A	0.14	0.13	0.15	0.23	0.32	0.33	0.25	0.14	0.2825	0.15	0.33	0.13	0.23	up
chr12:47866661:47866883:-@chr12:47866360:47866451:-	TUBA1A	0.07	0.12	0.15	0.2	0.31	0.3	0.26	0.113333	0.2675	0.15	0.31	0.07	0.2	up
chr12:47866661:47866883:-@chr12:47866360:47866451:-@chr12:47864829:47866040:-	TUBA1A	0.6	0.55	0.62	0.7	0.65	0.67	0.79	0.59	0.7025	0.62	0.79	0.55	0.65	up
chr12:47866661:47866883:-@chr12:47866360:47866502:-@chr12:47864829:47866040:-	TUBA1A	0.5	0.5	0.54	0.65	0.67	0.66	0.75	0.513333	0.6825	0.54	0.75	0.5	0.65	up
chr12:47866661:47866883:-@chr12:47866360:47866508:-@chr12:47864829:47866040:-	TUBA1A	0.65	0.74	0.75	0.91	0.85	0.94	0.95	0.713333	0.9125	0.75	0.95	0.65	0.85	up
chr12:47866661:47866883:-@chr12:47866451|47866502:47866360:-	TUBA1A	0.29	0.46	0.53	0.75	0.94	0.8	0.95	0.426667	0.86	0.53	0.95	0.29	0.75	up
chr12:47866661:47866883:-@chr12:47866451|47866508:47866360:-	TUBA1A	0.74	0.95	0.94	0.99	0.97	0.98	0.99	0.876667	0.9825	0.95	0.99	0.74	0.97	up
chr12:47866661:47866883:-@chr12:47866494:47866508:-@chr12:47864829:47866040:-	TUBA1A	0.13	0.2	0.19	0.3	0.3	0.26	0.37	0.173333	0.3075	0.2	0.37	0.13	0.26	up
chr12:47866686:47866883:-@chr12:47866360:47866442:-	TUBA1A	0.14	0.18	0.24	0.3	0.5	0.4	0.45	0.186667	0.4125	0.24	0.5	0.14	0.3	up
chr12:47866883:47866661|47866360:-@chr12:47864829:47866040:-	TUBA1A	0.25	0.26	0.28	0.35	0.37	0.34	0.4	0.263333	0.365	0.28	0.4	0.25	0.34	up
chr12:54789908:54789990|54789986:+@chr12:54790450:54790671:+	PA2G4	0.1	0.12	0.13	0.15	0.17	0.2	0.35	0.116667	0.2175	0.13	0.35	0.1	0.15	up
chr12:7245614:7245704:+@chr12:7246104:7246214:+@chr12:7246475:7246567:+	PEX5	0.29	0.46	0.31	0.7	0.64	0.6	0.76	0.353333	0.675	0.46	0.76	0.29	0.6	up
chr12:7873629:7873869:-@chr12:7872567:7872729:-@chr12:7871358:7871545:-	SLC2A14	0.41	0.47	0.41	0.55	0.83	0.52	0.8	0.43	0.675	0.47	0.83	0.41	0.52	up
chr12:9736691:9737811|9736794:+@chr12:9738623:9743418:+	CLEC2D	0.4	0.42	0.46	0.54	0.61	0.55	0.55	0.426667	0.5625	0.46	0.61	0.4	0.54	up
chr13:36496172:36496330:-@chr13:36494217|36494454:36494148:-	SUPT20H	0.44	0.47	0.42	0.5	0.63	0.6	0.65	0.443333	0.595	0.47	0.65	0.42	0.5	up
chr13:36531696:36531850:-@chr13:36526276:36526433:-@chr13:36523625:36523720:-	SUPT20H	0.28	0.28	0.32	0.35	0.47	0.36	0.51	0.293333	0.4225	0.32	0.51	0.28	0.35	up
chr13:45840385:45840178|45840174:-@chr13:45835251:45835349:-	RUBCNL	0.06	0.06	0.08	0.14	0.35	0.12	0.14	0.0666667	0.1875	0.08	0.35	0.06	0.12	up
chr13:98650681:98651194:+@chr13:98651684:98651822:+@chr13:98681689:98681768:+@chr13:98688682:98689197:+	UBAC2	0.51	0.57	0.4	0.65	0.65	0.79	0.69	0.493333	0.695	0.57	0.79	0.4	0.65	up
chr14:101768625:101769879:-@chr14:101767797:101767911:-@chr14:101764927:101765747:-	MOK	0.53	0.44	0.56	0.62	0.66	0.58	0.72	0.51	0.645	0.56	0.72	0.44	0.58	up
chr14:23183458:23183603|23183592:+@chr14:23183876:23184342:+	DHRS2	0.1	0.09	0.07	0.12	0.22	0.32	0.26	0.0866667	0.23	0.1	0.32	0.07	0.12	up
chr14:24588924:24589343:-@chr14:24549571:24549686:-@chr14:24513199:24513896:-	STXBP6	0.18	0.45	0.57	0.88	0.79	0.63	0.59	0.4	0.7225	0.57	0.88	0.18	0.59	up
chr14:31629459:31633343:+@chr14:31656100:31656244:+@chr14:31685220:31685297:+	ARHGAP5	0.57	0.51	0.58	0.66	0.68	0.67	0.8	0.553333	0.7025	0.58	0.8	0.51	0.66	up
chr14:38698405:38698505:-@chr14:38697240:38697357:-	TRAPPC6B	0.23	0.14	0.05	0.31	0.37	0.4	0.45	0.14	0.3825	0.23	0.45	0.05	0.31	up
chr14:50164499:50164930:+@chr14:50166463:50166477:+@chr14:50168697:50170047:+	ATL1	0.09	0.09	0.08	0.18	0.33	0.15	0.1	0.0866667	0.19	0.09	0.33	0.08	0.1	up
chr14:50296325:50296827:-@chr14:50292960:50295098:-@chr14:50291210:50291335:-	NIN	0.2	0.25	0.18	0.36	0.4	0.42	0.45	0.21	0.4075	0.25	0.45	0.18	0.36	up
chr14:66924772:66924694|66924689:-@chr14:66921425:66923926:-	PLEK2	0.05	0.08	0.05	0.18	0.49	0.3	0.29	0.06	0.315	0.08	0.49	0.05	0.18	up
chr14:68445866:68445788|68445784:-@chr14:68441125:68441206:-	ACTN1	0.13	0.05	0.11	0.14	0.32	0.21	0.21	0.0966667	0.22	0.13	0.32	0.05	0.14	up
chr15:100331631:100331832|100331828:+@chr15:100331921:100334293:+		0.28	0.28	0.17	0.49	0.36	0.34	0.34	0.243333	0.3825	0.28	0.49	0.17	0.34	up
chr15:40958039:40958174:-@chr15:40952101:40952248:-@chr15:40919850:40919923:-	TTBK2	0.57	0.69	0.76	0.81	0.77	0.88	0.81	0.673333	0.8175	0.76	0.88	0.57	0.77	up
chr15:41998949:41999027:-@chr15:41998468:41998770:-@chr15:41989372:41989469:-	FRMD5	0.11	0.14	0.3	0.65	0.56	0.57	0.54	0.183333	0.58	0.3	0.65	0.11	0.54	up
chr15:46419634:46420852:+@chr15:46420948|46420952:46421074:+	DUT	0.32	0.43	0.46	0.68	0.47	0.5	0.65	0.403333	0.575	0.46	0.68	0.32	0.47	up
chr15:61122958:61123404|61123083:+@chr15:61136237:61136370:+	TPM1	0.77	0.76	0.79	0.87	0.88	0.87	0.88	0.773333	0.875	0.79	0.88	0.76	0.87	up
chr15:62900234:62900533:-@chr15:62899238|62899271:62899099:-	PIF1	0.48	0.3	0.35	0.52	0.64	0.67	0.84	0.376667	0.6675	0.48	0.84	0.3	0.52	up
chr15:66284637:66287802:-@chr15:66276832:66277020:-@chr15:66268335:66273504:-	CALML4,CLN6	0.64	0.65	0.68	0.78	0.81	0.81	0.79	0.656667	0.7975	0.68	0.81	0.64	0.78	up
chr15:66284637:66287802:-@chr15:66278933:66279073:-@chr15:66276832:66277020:-	CALML4,CLN6	0.07	0.06	0.09	0.21	0.23	0.12	0.18	0.0733333	0.185	0.09	0.23	0.06	0.12	up
chr15:70851177:70851239:-@chr15:70839801:70839921:-@chr15:70830689:70832289:-	ADPGK	0.12	0.09	0.09	0.27	0.21	0.24	0.14	0.1	0.215	0.12	0.27	0.09	0.14	up
chr15:72113872:72113924:+@chr15:72114566:72115788:+	PML	0.35	0.45	0.48	0.51	0.69	0.53	0.51	0.426667	0.56	0.48	0.69	0.35	0.51	up
chr15:73440440:73440585:-@chr15:73439484:73439605:-	MAN2C1,MIR631	0.52	0.54	0.54	0.58	0.78	0.55	0.73	0.533333	0.66	0.54	0.78	0.52	0.55	up
chr15:76236305:76236559:+@chr15:76236945:76237028:+	IDH3A	0.15	0.08	0.26	0.27	0.64	0.42	0.37	0.163333	0.425	0.26	0.64	0.08	0.27	up
chr16:14936518:14936755:+@chr16:14938923:14939008:+@chr16:14943170:14943365:+	NPIPA1,LOC102724993	0.62	0.64	0.53	0.82	0.84	0.84	0.69	0.596667	0.7975	0.64	0.84	0.53	0.69	up
chr16:20821309:20821540:+@chr16:20830006:20830087:+@chr16:20834379:20834885:+	LYRM1	0.18	0.17	0.2	0.29	0.6	0.22	0.32	0.183333	0.3575	0.2	0.6	0.17	0.22	up
chr16:23451479:23451587:-@chr16:23448719|23448739:23448566:-	EARS2	0.11	0.06	0.1	0.14	0.26	0.24	0.16	0.09	0.2	0.11	0.26	0.06	0.14	up
chr16:29971951:29972321:+@chr16:29973994:29974149:+@chr16:29982551:29983070:+	ALDOA	0.32	0.51	0.51	0.66	0.63	0.65	0.62	0.446667	0.64	0.51	0.66	0.32	0.62	up
chr16:31103761:31104005|31104001:+@chr16:31105624:31105658:+	FUS	0.16	0.11	0.09	0.21	0.34	0.17	0.19	0.12	0.2275	0.16	0.34	0.09	0.17	up
chr16:4333209:4334334:-@chr16:4331506|4331585:4331370:-	PAM16,CORO7-PAM16	0.2	0.19	0.21	0.39	0.43	0.57	0.37	0.2	0.44	0.21	0.57	0.19	0.37	up
chr16:55777234:55777477:-@chr16:55769915:55769945:-@chr16:55765582:55765699:-	FAM192A	0.14	0.12	0.13	0.21	0.56	0.22	0.49	0.13	0.37	0.14	0.56	0.12	0.21	up
chr16:56065149:56065026|56065022:-@chr16:56063204:56064908:-	DOK4	0.13	0.08	0.14	0.15	0.33	0.21	0.21	0.116667	0.225	0.14	0.33	0.08	0.15	up
chr16:56241666:56241768|56241764:+@chr16:56242613:56243037:+	ADGRG1	0.02	0.04	0.03	0.08	0.29	0.41	0.09	0.03	0.2175	0.04	0.41	0.02	0.08	up
chr16:56389695:56389485|56389481:-@chr16:56386412:56386554:-	KIFC3	0.07	0.11	0.07	0.15	0.47	0.34	0.47	0.0833333	0.3575	0.11	0.47	0.07	0.15	up
chr16:570184:570973:+@chr16:571200:571342:+@chr16:572249:574114:+	PIGQ	0.21	0.16	0.24	0.38	0.49	0.58	0.33	0.203333	0.445	0.24	0.58	0.16	0.33	up
chr16:65769603:65770966:-@chr16:65769414:65769501:-@chr16:65766509:65768379:-	KIAA0895L	0.59	0.65	0.75	0.85	0.77	0.79	0.83	0.663333	0.81	0.75	0.85	0.59	0.77	up
chr16:65819899:65820061|65820039:+@chr16:65820201:65820682:+	TMEM208	0.11	0.22	0.3	0.51	0.62	0.64	0.51	0.21	0.57	0.3	0.64	0.11	0.51	up
chr16:672954:673088:-@chr16:671699:672875:-	JMJD8	0.08	0.11	0.15	0.25	0.25	0.19	0.18	0.113333	0.2175	0.15	0.25	0.08	0.18	up
chr16:672959:673088:-@chr16:671699:672875:-	JMJD8	0.11	0.21	0.25	0.41	0.26	0.37	0.36	0.19	0.35	0.25	0.41	0.11	0.26	up
chr16:73758169:73758312|73758295:+@chr16:73760652:73763633:+	ZFP1	0.18	0.1	0.13	0.2	0.42	0.22	0.23	0.136667	0.2675	0.18	0.42	0.1	0.2	up
chr16:83050713:83051908:+@chr16:83052501:83052707:+@chr16:83052821:83053434:+	ATP2C2	0.14	0.18	0.2	0.36	0.3	0.29	0.22	0.173333	0.2925	0.2	0.36	0.14	0.22	up
chr16:86347506:86347584:-@chr16:86346301:86346399:-	KLHDC4,LOC105371397	0.32	0.37	0.4	0.47	0.62	0.47	0.64	0.363333	0.55	0.4	0.64	0.32	0.47	up
chr16:87240747:87240664|87240660:-@chr16:87238795:87240106:-	CYBA	0.3	0.24	0.13	0.38	0.64	0.43	0.41	0.223333	0.465	0.3	0.64	0.13	0.38	up
chr16:88155136:88155298|88155281:+@chr16:88155487:88156300:+	RPL13	0.11	0.12	0.11	0.16	0.34	0.27	0.6	0.113333	0.3425	0.12	0.6	0.11	0.16	up
chr16:88492676:88492796|88492785:+@chr16:88494544:88494950:+	TCF25	0.58	0.62	0.64	0.7	0.67	0.83	0.68	0.613333	0.72	0.64	0.83	0.58	0.67	up
chr17:22658897:22659072:+@chr17:22660253:22660425:+	WSB1	0.48	0.69	0.74	0.81	0.77	0.79	0.85	0.636667	0.805	0.74	0.85	0.48	0.77	up
chr17:24437582:24437944:-@chr17:24436748:24436792:-@chr17:24433460:24433582:-	TIAF1,MYO18A	0.24	0.25	0.26	0.31	0.52	0.42	0.65	0.25	0.475	0.26	0.65	0.24	0.31	up
chr17:36928108:36932191:-@chr17:36927115:36927387:-@chr17:36926586:36926943:-	KRT15,MIR6510	0.12	0.06	0.07	0.16	0.23	0.33	0.16	0.0833333	0.22	0.12	0.33	0.06	0.16	up
chr17:37974014:37974103:+@chr17:37974381:37974487:+	MLX	0.34	0.35	0.32	0.43	0.41	0.42	0.79	0.336667	0.5125	0.35	0.79	0.32	0.41	up
chr17:39619865:39620003:+@chr17:39620511:39620637:+@chr17:39620801:39621322:+	TMUB2	0.63	0.37	0.52	0.83	0.77	0.72	0.85	0.506667	0.7925	0.63	0.85	0.37	0.72	up
chr17:39619865:39620003:+@chr17:39620570:39620637:+@chr17:39620801:39621322:+	TMUB2	0.75	0.68	0.5	0.78	0.79	0.8	0.83	0.643333	0.8	0.75	0.83	0.5	0.78	up
chr17:43405884:43406061|43406058:+@chr17:43406296:43406501:+	CDK5RAP3	0.3	0.18	0.31	0.36	0.39	0.34	0.51	0.263333	0.4	0.31	0.51	0.18	0.34	up
chr17:4784074:4784400:+@chr17:4784913|4784963:4785033:+	RNF167	0.49	0.14	0.31	0.5	0.53	0.53	0.67	0.313333	0.5575	0.49	0.67	0.14	0.5	up
chr17:5266813:5266873:+@chr17:5272115:5272255:+@chr17:5276586:5277280:+	RPAIN	0.21	0.24	0.27	0.37	0.36	0.34	0.37	0.24	0.36	0.27	0.37	0.21	0.34	up
chr17:5270015:5272255|5270343:+@chr17:5276586:5277280:+	RPAIN	0.21	0.28	0.25	0.29	0.37	0.34	0.42	0.246667	0.355	0.28	0.42	0.21	0.29	up
chr17:53769604:53770039:+@chr17:53778640:53778703:+@chr17:53784095:53785100:+	TSPOAP1-AS1	0.23	0.17	0.19	0.46	0.44	0.35	0.36	0.196667	0.4025	0.23	0.46	0.17	0.35	up
chr17:59437723:59438025:-@chr17:59437470:59437585:-@chr17:59434955:59436465:-	ICAM2	0.16	0.09	0.07	0.19	0.21	0.27	0.25	0.106667	0.23	0.16	0.27	0.07	0.19	up
chr17:6293356:6293451:+@chr17:6294072:6294116:+@chr17:6294406:6295513:+	FAM64A	0.71	0.72	0.76	0.83	0.85	0.79	0.89	0.73	0.84	0.76	0.89	0.71	0.79	up
chr17:63147956:63148108|63148104:+@chr17:63149158:63149215:+	NOL11	0.08	0.08	0.06	0.23	0.17	0.29	0.11	0.0733333	0.2	0.08	0.29	0.06	0.11	up
chr17:7104769:7104685|7104681:-@chr17:7102740:7104579:-	CLDN7	0.09	0.06	0.17	0.23	0.5	0.52	0.44	0.106667	0.4225	0.17	0.52	0.06	0.23	up
chr17:7430941:7431059:+@chr17:7431203:7431313:+	MPDU1	0.05	0.06	0.06	0.11	0.14	0.15	0.25	0.0566667	0.1625	0.06	0.25	0.05	0.11	up
chr17:7430941:7431059:+@chr17:7431212:7431313:+	MPDU1	0.13	0.13	0.14	0.58	0.32	0.34	0.54	0.133333	0.445	0.14	0.58	0.13	0.32	up
chr17:7430941:7431063:+@chr17:7431203:7431313:+	MPDU1	0.05	0.11	0.09	0.42	0.2	0.31	0.25	0.0833333	0.295	0.11	0.42	0.05	0.2	up
chr17:76003543:76004216:+@chr17:76010535:76010640:+@chr17:76011915:76012211:+	MIR4730,ENDOV	0.33	0.4	0.39	0.54	0.56	0.41	0.49	0.373333	0.5	0.4	0.56	0.33	0.41	up
chr17:77260448:77260561:-@chr17:77259469:77260110:-	ARL16	0.25	0.3	0.32	0.35	0.38	0.49	0.39	0.29	0.4025	0.32	0.49	0.25	0.35	up
chr17:78490532:78490645|78490641:+@chr17:78492564:78493867:+	TBCD	0.32	0.25	0.26	0.34	0.54	0.35	0.59	0.276667	0.455	0.32	0.59	0.25	0.34	up
chr18:19977053:19977221:+@chr18:19977322:19977375:+@chr18:19989663:19990961:+	CABYR	0.82	0.8	0.79	0.97	0.86	0.95	0.93	0.803333	0.9275	0.82	0.97	0.79	0.86	up
chr18:255363:255303|255299:-@chr18:253493:254092:-	THOC1	0.27	0.47	0.42	0.51	0.49	0.53	0.49	0.386667	0.505	0.47	0.53	0.27	0.49	up
chr18:3584418:3584482:+@chr18:3586577:3586673:+@chr18:3587174:3587806:+		0.39	0.17	0.34	0.81	0.44	0.61	0.42	0.3	0.57	0.39	0.81	0.17	0.42	up
chr18:53439938:53440411:-@chr18:53438878|53438881:53438799:-	NARS	0.64	0.72	0.73	0.89	0.85	0.86	0.76	0.696667	0.84	0.73	0.89	0.64	0.76	up
chr18:72857776:72858233:-@chr18:72830876:72831004:-@chr18:72825719:72829856:-	MBP	0.39	0.34	0.33	0.54	0.47	0.54	0.46	0.353333	0.5025	0.39	0.54	0.33	0.46	up
chr18:72857776:72858233:-@chr18:72830900:72831004:-@chr18:72829439:72829464:-@chr18:72825672:72825838:-	MBP	0.26	0.08	0.17	0.32	0.44	0.47	0.35	0.17	0.395	0.26	0.47	0.08	0.32	up
chr18:72857776:72858233:-@chr18:72830956|72830984:72830900:-	MBP	0.32	0.14	0.27	0.41	0.43	0.52	0.34	0.243333	0.425	0.32	0.52	0.14	0.34	up
chr18:72857776:72858233:-@chr18:72830956|72831004:72830900:-	MBP	0.2	0.07	0.16	0.41	0.34	0.43	0.32	0.143333	0.375	0.2	0.43	0.07	0.32	up
chr18:72857776:72858233:-@chr18:72831771:72831858:-@chr18:72830662:72831004:-	MBP	0.29	0.1	0.18	0.37	0.45	0.54	0.35	0.19	0.4275	0.29	0.54	0.1	0.35	up
chr18:72857776:72858233:-@chr18:72836367:72836415:-@chr18:72831771:72831858:-@chr18:72830662:72831004:-	MBP	0.37	0.17	0.3	0.44	0.45	0.43	0.55	0.28	0.4675	0.37	0.55	0.17	0.43	up
chr18:72857776:72858233:-@chr18:72850793:72850870:-@chr18:72830662:72831004:-	MBP	0.25	0.11	0.27	0.45	0.43	0.5	0.31	0.21	0.4225	0.27	0.5	0.11	0.31	up
chr19:12863301:12863788:+@chr19:12864131:12864248:+@chr19:12865297:12866723:+	GCDH	0.12	0.09	0.1	0.14	0.39	0.16	0.15	0.103333	0.21	0.12	0.39	0.09	0.14	up
chr19:13087950:13088245:-@chr19:13087811:13087866:-	TRMT1	0.07	0.12	0.08	0.22	0.37	0.14	0.22	0.09	0.2375	0.12	0.37	0.07	0.14	up
chr19:37647474:37647530:+@chr19:37650220:37651559:+@chr19:37660268:37660400:+	DPY19L3	0.6	0.7	0.6	0.8	0.73	0.75	0.72	0.633333	0.75	0.7	0.8	0.6	0.72	up
chr19:40441688:40441807:+@chr19:40445239:40445435:+@chr19:40449102:40449275:+	LSR	0.39	0.38	0.36	0.49	0.58	0.43	0.49	0.376667	0.4975	0.39	0.58	0.36	0.43	up
chr19:40441688:40441807:+@chr19:40445289:40445435:+@chr19:40449102:40449275:+	LSR	0.65	0.64	0.61	0.77	0.84	0.72	0.8	0.633333	0.7825	0.65	0.84	0.61	0.72	up
chr19:40441688:40441807:+@chr19:40445289:40445439:+@chr19:40449102:40449275:+	LSR	0.53	0.5	0.48	0.65	0.72	0.58	0.65	0.503333	0.65	0.53	0.72	0.48	0.58	up
chr19:40449422:40449481:+@chr19:40449579:40449710:+	LSR	0.03	0.07	0.1	0.12	0.24	0.17	0.64	0.0666667	0.2925	0.1	0.64	0.03	0.12	up
chr19:48463776:48464141:-@chr19:48454849:48455127:-@chr19:48453099:48454448:-	PSG9	0.62	0.89	0.79	0.98	0.91	0.95	0.95	0.766667	0.9475	0.89	0.98	0.62	0.91	up
chr19:5599027:5599054:+@chr19:5600000:5600510:+@chr19:5600937:5600986:+	SAFB	0.45	0.46	0.51	0.53	0.58	0.62	0.6	0.473333	0.5825	0.51	0.62	0.45	0.53	up
chr19:58593008:58593095:+@chr19:58597130:58597256:+@chr19:58602763:58607074:+	ZNF765	0.48	0.53	0.51	0.56	0.55	0.71	0.67	0.506667	0.6225	0.53	0.71	0.48	0.55	up
chr19:59339785:59339880:+@chr19:59341143|59341146:59341365:+	CNOT3	0.18	0.17	0.2	0.22	0.34	0.39	0.26	0.183333	0.3025	0.2	0.39	0.17	0.22	up
chr19:852546:852422|852420:-@chr19:851829:851952:-	R3HDM4	0.11	0.09	0.11	0.27	0.33	0.12	0.16	0.103333	0.22	0.11	0.33	0.09	0.12	up
chr1:142535724:142536990:-@chr1:142512568:142512688:-@chr1:142510922:142511478:-		0.46	0.44	0.4	0.72	0.49	0.65	0.71	0.433333	0.6425	0.46	0.72	0.4	0.49	up
chr1:149055359:149055506:-@chr1:149053336|149053339:149053177:-	ARNT	0.61	0.77	0.65	0.9	0.79	0.83	0.85	0.676667	0.8425	0.77	0.9	0.61	0.79	up
chr1:149085363:149085407:-@chr1:149081524:149081568:-@chr1:149078499:149078754:-	ARNT	0.8	0.85	0.72	0.93	0.92	0.92	0.93	0.79	0.925	0.85	0.93	0.72	0.92	up
chr1:154553662:154553577|154553568:-@chr1:154548456:154548636:-	CCT3	0.37	0.37	0.37	0.48	0.49	0.42	0.5	0.37	0.4725	0.37	0.5	0.37	0.42	up
chr1:155175964:155176326:-@chr1:155174834:155174875:-@chr1:155173665:155173912:-	ARHGEF11	0.05	0.1	0.04	0.49	0.35	0.4	0.73	0.0633333	0.4925	0.1	0.73	0.04	0.35	up
chr1:155175964:155176326:-@chr1:155174834:155174929:-@chr1:155173665:155173912:-	ARHGEF11	0.4	0.25	0.21	0.88	0.89	0.85	0.91	0.286667	0.8825	0.4	0.91	0.21	0.85	up
chr1:155175964:155176326:-@chr1:155174875|155174929:155174834:-	ARHGEF11	0.67	0.46	0.69	0.9	0.9	0.91	0.94	0.606667	0.9125	0.69	0.94	0.46	0.9	up
chr1:172100436:172100666:-@chr1:172100245:172100263:-@chr1:172099662:172100065:-	GAS5	0.25	0.21	0.28	0.51	0.48	0.33	0.3	0.246667	0.405	0.28	0.51	0.21	0.3	up
chr1:205579365:205579385:+@chr1:205587415:205587529:+@chr1:205593975:205594067:+@chr1:205599514:205601066:+	CD55	0.44	0.33	0.4	0.59	0.51	0.56	0.57	0.39	0.5575	0.44	0.59	0.33	0.51	up
chr1:206025587:206025650:+@chr1:206030221:206030313:+@chr1:206033487:206035484:+	CD46	0.35	0.45	0.42	0.46	0.63	0.57	0.49	0.406667	0.5375	0.45	0.63	0.35	0.46	up
chr1:210858092:210858203|210858199:+@chr1:210859323:210860744:+	ATF3	0.12	0.1	0.13	0.22	0.38	0.23	0.26	0.116667	0.2725	0.13	0.38	0.1	0.22	up
chr1:222024166:222024234:+@chr1:222024772:222024850:+	CAPN2	0.27	0.12	0.28	0.37	0.61	0.62	0.64	0.223333	0.56	0.28	0.64	0.12	0.37	up
chr1:224552043:224552137:-@chr1:224550166:224550270:-@chr1:224541984:224542121:-	LIN9	0.8	0.75	0.76	0.88	0.88	0.87	0.88	0.77	0.8775	0.8	0.88	0.75	0.87	up
chr1:241372388:241372292|241372241:-@chr1:241369862:241370032:-	CEP170,CEP170P1	0.74	0.76	0.68	0.84	0.79	0.86	0.91	0.726667	0.85	0.76	0.91	0.68	0.79	up
chr1:245331912:245332038:-@chr1:245331656:245331716:-@chr1:245329887:245331244:-	ZNF669	0.71	0.63	0.71	0.8	0.87	0.89	0.77	0.683333	0.8325	0.71	0.89	0.63	0.77	up
chr1:3778896:3778996:+@chr1:3779438:3779561:+@chr1:3789931:3791859:+	DFFB	0.17	0.08	0.17	0.2	0.43	0.2	0.23	0.14	0.265	0.17	0.43	0.08	0.2	up
chr1:44593151:44593526:-@chr1:44577304:44577581:-@chr1:44557887:44558003:-	ERI3	0.72	0.72	0.84	0.91	0.91	0.86	0.86	0.76	0.885	0.84	0.91	0.72	0.86	up
chr1:67624850:67624940:+@chr1:67628300:67628399:+@chr1:67633818:67635171:+	IL12RB2	0.31	0.59	0.53	0.63	0.65	0.61	0.77	0.476667	0.665	0.59	0.77	0.31	0.61	up
chr1:67663354:67663494:-@chr1:67663230|67663248:67663159:-	SERBP1	0.58	0.63	0.52	0.69	0.7	0.67	0.69	0.576667	0.6875	0.63	0.7	0.52	0.67	up
chr1:70423185:70423056|70423052:-@chr1:70419357:70419480:-	LRRC40	0.13	0.09	0.15	0.2	0.17	0.28	0.37	0.123333	0.255	0.15	0.37	0.09	0.17	up
chr1:71305047:71305822:-@chr1:71303949:71304023:-@chr1:71301557:71303408:-	ZRANB2	0.41	0.49	0.48	0.52	0.62	0.6	0.58	0.46	0.58	0.49	0.62	0.41	0.52	up
chr1:74971228:74971683:-@chr1:74971039:74971110:-@chr1:74968654:74968692:-@chr1:74962983:74963106:-	CRYZ	0.15	0.08	0.1	0.17	0.3	0.18	0.2	0.11	0.2125	0.15	0.3	0.08	0.17	up
chr1:85816255:85816634:-@chr1:85734437:85734552:-@chr1:85597019:85597118:-	DDAH1	0.69	0.75	0.55	0.77	0.78	0.77	0.88	0.663333	0.8	0.75	0.88	0.55	0.77	up
chr1:8606956:8607026:-@chr1:8597207:8597332:-@chr1:8540064:8540169:-	RERE	0.59	0.54	0.65	0.67	0.7	0.77	0.74	0.593333	0.72	0.65	0.77	0.54	0.67	up
chr1:89258803:89259014:-@chr1:89258401:89258482:-@chr1:89253558:89253685:-	GBP3	0.17	0.26	0.17	0.28	0.31	0.59	0.42	0.2	0.4	0.26	0.59	0.17	0.28	up
chr1:9723739:9723905:-@chr1:9720143:9720199:-@chr1:9718530:9718687:-	CLSTN1	0.13	0.24	0.09	0.35	0.25	0.32	0.27	0.153333	0.2975	0.24	0.35	0.09	0.25	up
chr20:18217121:18217248:+@chr20:18234963:18235037:+@chr20:18243716:18245640:+	ZNF133	0.3	0.29	0.36	0.58	0.47	0.62	0.39	0.316667	0.515	0.36	0.62	0.29	0.39	up
chr20:36594787:36594916:+@chr20:36597131|36597143:36597264:+	RALGAPB	0.45	0.52	0.45	0.68	0.53	0.64	0.67	0.473333	0.63	0.52	0.68	0.45	0.53	up
chr20:56721883:56722006:+@chr20:56722380:56722556:+	STX16-NPEPL1,NPEPL1	0.1	0.11	0.1	0.18	0.39	0.12	0.22	0.103333	0.2275	0.11	0.39	0.1	0.12	up
chr20:60937718:60937750:+@chr20:60937984:60938130:+@chr20:60938275:60938329:+	COL9A3	0.56	0.59	0.57	0.68	0.68	0.73	0.68	0.573333	0.6925	0.59	0.73	0.56	0.68	up
chr20:61706540:61706700:-@chr20:61704884|61704889:61704762:-	GMEB2	0.57	0.77	0.55	0.81	0.78	0.86	0.85	0.63	0.825	0.77	0.86	0.55	0.78	up
chr20:61802398:61802498:-@chr20:61801275:61802326:-	ARFRP1	0.2	0.29	0.16	0.37	0.43	0.34	0.41	0.216667	0.3875	0.29	0.43	0.16	0.34	up
chr21:37561409:37562294:-@chr21:37527533:37527613:-@chr21:37526516:37526622:-	DSCR3	0.32	0.19	0.21	0.43	0.46	0.54	0.35	0.24	0.445	0.32	0.54	0.19	0.35	up
chr21:43186447:43186560:+@chr21:43190199:43190226:+@chr21:43196361:43197455:+	NDUFV3	0.34	0.36	0.43	0.62	0.56	0.59	0.48	0.376667	0.5625	0.43	0.62	0.34	0.48	up
chr21:43349982:43350117:-@chr21:43349237:43349278:-@chr21:43346368:43347162:-	CBS	0.08	0.06	0.09	0.17	0.32	0.18	0.13	0.0766667	0.2	0.09	0.32	0.06	0.13	up
chr21:44203943:44204172|44204168:+@chr21:44204941:44205088:+	AGPAT3	0.17	0.11	0.14	0.21	0.39	0.36	0.41	0.14	0.3425	0.17	0.41	0.11	0.21	up
chr21:44381487:44381610|44381606:+@chr21:44384560:44384914:+	C21orf33,LOC102724023	0.11	0.08	0.11	0.18	0.37	0.13	0.15	0.1	0.2075	0.11	0.37	0.08	0.13	up
chr22:17822272:17822353:-@chr22:17818144:17818267:-	UFD1L	0.17	0.21	0.39	0.55	0.43	0.69	0.8	0.256667	0.6175	0.39	0.8	0.17	0.43	up
chr22:28014595:28017588|28014744:+@chr22:28018126:28018158:+	EWSR1	0.63	0.35	0.55	0.78	0.79	0.69	0.75	0.51	0.7525	0.63	0.79	0.35	0.69	up
chr22:28024723:28024885:+@chr22:28025185:28025270:+	EWSR1	0.14	0.31	0.29	0.38	0.45	0.36	0.39	0.246667	0.395	0.31	0.45	0.14	0.36	up
chr22:28056367:28056566:-@chr22:28055701:28055709:-@chr22:28053669:28054884:-	AP1B1	0.05	0.09	0.06	0.3	0.27	0.41	0.32	0.0666667	0.325	0.09	0.41	0.05	0.27	up
chr22:29698841:29699587|29699573:+@chr22:29701199:29701465:+	MTMR3	0.67	0.47	0.46	0.8	0.91	0.91	0.72	0.533333	0.835	0.67	0.91	0.46	0.72	up
chr22:34072923:34072965|34072962:+@chr22:34073048:34073985:+	TOM1	0.28	0.27	0.15	0.4	0.75	0.56	0.39	0.233333	0.525	0.28	0.75	0.15	0.39	up
chr22:36533858:36534116:+@chr22:36538840:36538941:+@chr22:36539416:36539562:+	GCAT	0.68	0.78	0.71	0.8	0.81	0.83	0.86	0.723333	0.825	0.78	0.86	0.68	0.8	up
chr22:37481714:37481964:-@chr22:37480593:37480638:-@chr22:37478458:37478616:-	SUN2	0.25	0.18	0.13	0.33	0.37	0.47	0.35	0.186667	0.38	0.25	0.47	0.13	0.33	up
chr22:41243955:41244097:-@chr22:41242044|41242246:41241961:-	RRP7A	0.53	0.51	0.56	0.61	0.6	0.82	0.73	0.533333	0.69	0.56	0.82	0.51	0.6	up
chr22:44325036:44325159:+@chr22:44349055:44349197:+@chr22:44351521:44351652:+	FBLN1	0.62	0.85	0.62	0.86	0.87	0.92	0.9	0.696667	0.8875	0.85	0.92	0.62	0.86	up
chr22:49311541:49311771:-@chr22:49311296:49311451:-@chr22:49308865:49311213:-	SCO2,TYMP	0.1	0.1	0.12	0.18	0.38	0.41	0.2	0.106667	0.2925	0.12	0.41	0.1	0.18	up
chr2:101847824:101847930:+@chr2:101849322|101849325:101849473:+	MAP4K4	0.65	0.67	0.67	0.85	0.71	0.86	0.7	0.663333	0.78	0.67	0.86	0.65	0.7	up
chr2:113709555:113709618:+@chr2:113710561:113710661:+@chr2:113712137:113712259:+	PAX8-AS1	0.59	0.57	0.62	0.85	0.67	0.79	0.72	0.593333	0.7575	0.62	0.85	0.57	0.67	up
chr2:113709555:113709618:+@chr2:113710561:113710670:+@chr2:113712137:113712259:+	PAX8-AS1	0.62	0.63	0.68	0.8	0.74	0.8	0.76	0.643333	0.775	0.68	0.8	0.62	0.74	up
chr2:159902529:159902324|159902219:-@chr2:159901699:159901834:-	BAZ2B	0.67	0.43	0.58	0.78	0.74	0.75	0.69	0.56	0.74	0.67	0.78	0.43	0.69	up
chr2:172257533:172257655|172257650:+@chr2:172272043:172272133:+	DYNC1I2	0.14	0.06	0.14	0.15	0.27	0.37	0.26	0.113333	0.2625	0.14	0.37	0.06	0.15	up
chr2:190355985:190356094:-@chr2:190355393:190355573:-	ORMDL1	0.33	0.43	0.31	0.46	0.44	0.5	0.6	0.356667	0.5	0.43	0.6	0.31	0.44	up
chr2:203444587:203444953:-@chr2:203442504:203442573:-@chr2:203401816:203401984:-	ICA1L	0.11	0.05	0.11	0.16	0.2	0.23	0.25	0.09	0.21	0.11	0.25	0.05	0.16	up
chr2:210588929:210589081:+@chr2:210589173:210589226:+@chr2:210589476:210589610:+	RPE	0.07	0.08	0.05	0.12	0.21	0.17	0.39	0.0666667	0.2225	0.08	0.39	0.05	0.12	up
chr2:219781222:219781452:+@chr2:219781538:219782613:+	ZFAND2B	0.31	0.51	0.53	0.7	0.85	0.67	0.56	0.45	0.695	0.53	0.85	0.31	0.56	up
chr2:238763352:238763239|238763233:-@chr2:238761511:238761637:-	ILKAP	0.78	0.64	0.78	0.86	0.81	0.89	0.8	0.733333	0.84	0.78	0.89	0.64	0.8	up
chr2:241685331:241685515:-@chr2:241683218:241684526:-@chr2:241682365:241682520:-	MTERF4	0.53	0.57	0.57	0.61	0.75	0.69	0.67	0.556667	0.68	0.57	0.75	0.53	0.61	up
chr2:242273857:242273965:-@chr2:242272804:242272837:-@chr2:242266540:242266737:-	DTYMK	0.16	0.09	0.15	0.24	0.49	0.22	0.31	0.133333	0.315	0.16	0.49	0.09	0.22	up
chr2:28945949:28946780:-@chr2:28937488:28937678:-@chr2:28928778:28928869:-	TRMT61B	0.33	0.29	0.31	0.5	0.41	0.53	0.48	0.31	0.48	0.33	0.53	0.29	0.41	up
chr2:37312753:37312913:+@chr2:37318404:37318482:+@chr2:37322225:37323340:+	NDUFAF7	0.41	0.49	0.36	0.68	0.68	0.51	0.61	0.42	0.62	0.49	0.68	0.36	0.51	up
chr2:39852284:39852159|39852149:-@chr2:39850354:39850763:-	THUMPD2	0.52	0.64	0.54	0.73	0.74	0.69	0.69	0.566667	0.7125	0.64	0.74	0.52	0.69	up
chr2:44442167:44442504:-@chr2:44440140:44440239:-@chr2:44426911:44427033:-	PREPL	0.11	0.16	0.2	0.23	0.3	0.25	0.46	0.156667	0.31	0.2	0.46	0.11	0.23	up
chr2:60874610:60875659:+@chr2:60875929:60875975:+@chr2:60877701:60882725:+	PAPOLG	0.07	0.04	0.07	0.24	0.2	0.37	0.12	0.06	0.2325	0.07	0.37	0.04	0.12	up
chr2:70382158:70382239:-@chr2:70381476:70381616:-	FAM136A	0.61	0.68	0.58	0.83	0.82	0.77	0.83	0.623333	0.8125	0.68	0.83	0.58	0.77	up
chr2:85435710:85435804:+@chr2:85437601:85437886:+	ELMOD3	0.48	0.25	0.55	0.71	0.6	0.66	0.64	0.426667	0.6525	0.55	0.71	0.25	0.6	up
chr3:109259014:109259106:-@chr3:109253476:109253507:-@chr3:109244629:109248829:-	CD47	0.71	0.59	0.6	0.76	0.75	0.73	0.8	0.633333	0.76	0.71	0.8	0.59	0.73	up
chr3:130081024:130081550:+@chr3:130086190:130086279:+@chr3:130095088:130095189:+	ACAD9	0.66	0.78	0.73	0.8	0.81	0.8	0.89	0.723333	0.825	0.78	0.89	0.66	0.8	up
chr3:133887921:133887794|133886088:-@chr3:133884933:133885058:-	NPHP3	0.62	0.57	0.32	0.72	0.68	0.7	0.72	0.503333	0.705	0.62	0.72	0.32	0.68	up
chr3:139279031:139279164:-@chr3:139273175:139273367:-@chr3:139269683:139269899:-	DZIP1L	0.58	0.57	0.61	0.77	0.65	0.75	0.75	0.586667	0.73	0.61	0.77	0.57	0.65	up
chr3:142587979:142588469:+@chr3:142597791:142598035:+@chr3:142605459:142605563:+	ZBTB38	0.67	0.74	0.73	0.79	0.92	0.76	0.93	0.713333	0.85	0.74	0.93	0.67	0.76	up
chr3:162303909:162303999:-@chr3:162290426:162290548:-@chr3:162284365:162287270:-	B3GALNT1	0.24	0.26	0.34	0.42	0.45	0.35	0.48	0.28	0.425	0.34	0.48	0.24	0.35	up
chr3:169241874:169241956:-@chr3:169241268:169241351:-@chr3:169237318:169237476:-	GOLIM4	0.57	0.57	0.45	0.63	0.62	0.64	0.83	0.53	0.68	0.57	0.83	0.45	0.62	up
chr3:171581726:171581823:+@chr3:171585015:171585109:+@chr3:171590705:171590946:+	SKIL	0.64	0.61	0.53	0.8	0.82	0.69	0.86	0.593333	0.7925	0.64	0.86	0.53	0.69	up
chr3:187744789:187745748:-@chr3:187741157:187741275:-@chr3:187739838:187740080:-	CRYGS	0.2	0.38	0.41	0.53	0.52	0.48	0.53	0.33	0.515	0.41	0.53	0.2	0.48	up
chr3:198904983:198905853:-@chr3:198902342:198902416:-@chr3:198895425:198895485:-	RUBCN,MIR922	0.12	0.1	0.19	0.27	0.47	0.27	0.33	0.136667	0.335	0.19	0.47	0.1	0.27	up
chr3:37111287:37111403:-@chr3:37107962:37108033:-@chr3:37100131:37100301:-	LRRFIP2	0.36	0.49	0.41	0.6	0.54	0.58	0.62	0.42	0.585	0.49	0.62	0.36	0.54	up
chr3:39117242:39117372:-@chr3:39116800:39116949:-	GORASP1	0.09	0.18	0.22	0.41	0.35	0.27	0.24	0.163333	0.3175	0.22	0.41	0.09	0.24	up
chr3:52461308:52461175|52461162:-@chr3:52460774:52460914:-	TNNC1	0.68	0.79	0.79	0.94	0.9	0.94	0.94	0.753333	0.93	0.79	0.94	0.68	0.9	up
chr3:57883656:57883790:+@chr3:57886612:57886701:+@chr3:57888063:57891305:+	SLMAP	0.39	0.33	0.3	0.65	0.52	0.7	0.63	0.34	0.625	0.39	0.7	0.3	0.52	up
chr4:146252841:146252934|146252930:+@chr4:146257895:146258216:+	ABCE1	0.16	0.03	0.1	0.19	0.18	0.31	0.27	0.0966667	0.2375	0.16	0.31	0.03	0.18	up
chr4:170870805:170871021:+@chr4:170875518:170875593:+@chr4:170877633:170881736:+	CLCN3	0.22	0.2	0.18	0.23	0.42	0.36	0.27	0.2	0.32	0.22	0.42	0.18	0.23	up
chr4:185566306:185566423:-@chr4:185565327:185565431:-@chr4:185557063:185557227:-	IRF2	0.06	0.02	0.04	0.09	0.33	0.15	0.13	0.04	0.175	0.06	0.33	0.02	0.09	up
chr4:2794920:2795098|2795094:+@chr4:2796138:2796721:+	SH3BP2	0.34	0.23	0.17	0.49	0.36	0.36	0.73	0.246667	0.485	0.34	0.73	0.17	0.36	up
chr4:456364:456490:-@chr4:421235:421300:-@chr4:406991:410908:-	ABCA11P,ZNF721	0.35	0.2	0.26	0.49	0.64	0.55	0.63	0.27	0.5775	0.35	0.64	0.2	0.49	up
chr5:111120732:111120854:-@chr5:111119366:111119426:-@chr5:111097110:111099103:-	NREP	0.45	0.39	0.49	0.75	0.62	0.75	0.7	0.443333	0.705	0.49	0.75	0.39	0.62	up
chr5:112228030:112228124:+@chr5:112245553:112245645:+@chr5:112255199:112256730:+	SRP19	0.25	0.19	0.15	0.36	0.41	0.29	0.3	0.196667	0.34	0.25	0.41	0.15	0.29	up
chr5:124002725:124002806:-@chr5:124002374:124002415:-@chr5:124000505:124001498:-	ZNF608	0.29	0.24	0.34	0.4	0.43	0.56	0.52	0.29	0.4775	0.34	0.56	0.24	0.4	up
chr5:131634895:131635058:+@chr5:131635383:131635500:+	PDLIM4	0.12	0.18	0.16	0.19	0.72	0.29	0.26	0.153333	0.365	0.18	0.72	0.12	0.19	up
chr5:135409923:135410080:+@chr5:135410439:135410603:+	TGFBI	0.1	0.1	0.07	0.11	0.18	0.32	0.21	0.09	0.205	0.1	0.32	0.07	0.11	up
chr5:135409923:135410083:+@chr5:135410443:135410603:+	TGFBI	0.1	0.1	0.07	0.11	0.18	0.35	0.25	0.09	0.2225	0.1	0.35	0.07	0.11	up
chr5:135409923:135410144:+@chr5:135410439:135410603:+	TGFBI	0.14	0.14	0.1	0.15	0.21	0.32	0.24	0.126667	0.23	0.14	0.32	0.1	0.15	up
chr5:135409923:135410144|135410080:+@chr5:135410439:135410603:+	TGFBI	0.11	0.08	0.09	0.17	0.25	0.49	0.44	0.0933333	0.3375	0.11	0.49	0.08	0.17	up
chr5:140051198:140051525:+@chr5:140053260:140053277:+@chr5:140053360:140053434:+	HARS2	0.08	0.03	0.07	0.13	0.35	0.1	0.11	0.06	0.1725	0.08	0.35	0.03	0.1	up
chr5:64893147:64893080|64893046:-@chr5:64886380:64886529:-	CENPK	0.5	0.68	0.68	0.77	0.75	0.71	0.7	0.62	0.7325	0.68	0.77	0.5	0.7	up
chr6:107961356:107961507:+@chr6:108014977:108015072:+@chr6:108061411:108063366:+	SOBP	0.59	0.49	0.53	0.8	0.84	0.87	0.91	0.536667	0.855	0.59	0.91	0.49	0.8	up
chr6:139292807:139292928:-@chr6:139289231:139289311:-	REPS1	0.04	0.04	0.1	0.17	0.29	0.27	0.52	0.06	0.3125	0.1	0.52	0.04	0.17	up
chr6:237053:237560:+@chr6:256880:256914:+@chr6:290854:290928:+	DUSP22	0.4	0.23	0.29	0.47	0.54	0.48	0.5	0.306667	0.4975	0.4	0.54	0.23	0.47	up
chr6:24520429:24520602:+@chr6:24523223|24523240:24523370:+	MRS2	0.09	0.09	0.05	0.1	0.18	0.24	0.3	0.0766667	0.205	0.09	0.3	0.05	0.1	up
chr6:26077532:26077627:+@chr6:26080130:26080306:+	TRIM38	0.14	0.08	0.1	0.24	0.6	0.44	0.35	0.106667	0.4075	0.14	0.6	0.08	0.24	up
chr6:2785827:2785678|2785582:-@chr6:2783782:2783919:-	SERPINB1	0.32	0.26	0.38	0.4	0.49	0.56	0.61	0.32	0.515	0.38	0.61	0.26	0.4	up
chr6:30716133:30718003:+@chr6:30718524:30718767:+@chr6:30721651:30721865:+	ATAT1	0.29	0.13	0.22	0.48	0.52	0.39	0.42	0.213333	0.4525	0.29	0.52	0.13	0.39	up
chr6:31868148:31868272:-@chr6:31868057|31868060:31867973:-	VARS	0.15	0.21	0.09	0.4	0.48	0.4	0.37	0.15	0.4125	0.21	0.48	0.09	0.37	up
chr6:34497562:34497485|34497481:-@chr6:34493209:34494179:-	RPS10	0.24	0.28	0.26	0.34	0.61	0.47	0.44	0.26	0.465	0.28	0.61	0.24	0.34	up
chr6:36214120:36214203|36214199:+@chr6:36214457:36215323:+	MAPK13	0.11	0.04	0.08	0.18	0.55	0.25	0.31	0.0766667	0.3225	0.11	0.55	0.04	0.18	up
chr6:39180122:39181530:-@chr6:39179857:39179974:-	SAYSD1	0.31	0.31	0.36	0.37	0.46	0.62	0.42	0.326667	0.4675	0.36	0.62	0.31	0.37	up
chr6:42124217:42124679:-@chr6:42105725:42105906:-@chr6:42015318:42016301:-	CCND3	0.13	0.1	0.09	0.3	0.38	0.19	0.26	0.106667	0.2825	0.13	0.38	0.09	0.19	up
chr6:43854604:43854633:+@chr6:43857671:43857767:+@chr6:43860256:43862203:+	VEGFA	0.38	0.17	0.32	0.44	0.4	0.5	0.76	0.29	0.525	0.38	0.76	0.17	0.4	up
chr6:79724911:79725036:-@chr6:79722049:79722118:-	PHIP	0.25	0.32	0.38	0.53	0.46	0.43	0.68	0.316667	0.525	0.38	0.68	0.25	0.43	up
chr7:142672207:142672307:+@chr7:142672476:142672511:+	GSTK1	0.64	0.51	0.48	0.73	0.66	0.68	0.66	0.543333	0.6825	0.64	0.73	0.48	0.66	up
chr7:23537933:23538182:-@chr7:23528265:23528576:-@chr7:23527851:23527984:-	TRA2A	0.18	0.23	0.2	0.26	0.39	0.33	0.28	0.203333	0.315	0.23	0.39	0.18	0.26	up
chr7:23537933:23538182:-@chr7:23528276:23528576:-@chr7:23527851:23527984:-	TRA2A	0.17	0.21	0.2	0.26	0.39	0.32	0.28	0.193333	0.3125	0.21	0.39	0.17	0.26	up
chr7:43971991:43972085:-@chr7:43968097:43968192:-@chr7:43958035:43959320:-	POLR2J4	0.23	0.15	0.3	0.32	0.43	0.37	0.34	0.226667	0.365	0.3	0.43	0.15	0.32	up
chr7:44802766:44802917:+@chr7:44804872:44805028:+@chr7:44805371:44805401:+	PPIA	0.26	0.2	0.25	0.29	0.32	0.41	0.43	0.236667	0.3625	0.26	0.43	0.2	0.29	up
chr7:4982458:4982593:+@chr7:4991067:4991232:+@chr7:5002767:5004870:+	RNF216P1,RBAK	0.32	0.26	0.31	0.47	0.6	0.67	0.42	0.296667	0.54	0.32	0.67	0.26	0.42	up
chr7:50484915:50484748|50484692:-@chr7:50483373:50483481:-	FIGNL1	0.6	0.62	0.66	0.7	0.71	0.8	0.73	0.626667	0.735	0.66	0.8	0.6	0.7	up
chr7:71999408:71999585:+@chr7:72009504:72009601:+@chr7:72021551:72022757:+	POM121	0.42	0.26	0.42	0.47	0.53	0.77	0.54	0.366667	0.5775	0.42	0.77	0.26	0.47	up
chr7:91507924:91508148:+@chr7:91509296:91509436:+@chr7:91509918:91510393:+	AKAP9	0.47	0.34	0.32	0.59	0.54	0.56	0.7	0.376667	0.5975	0.47	0.7	0.32	0.54	up
chr7:98351282:98351447|98351390:+@chr7:98352982:98353238:+	TRRAP	0.76	0.82	0.76	0.87	0.89	0.88	0.93	0.78	0.8925	0.82	0.93	0.76	0.87	up
chr8:102034254:102034671:-@chr8:102033529|102033532:102033333:-	YWHAZ	0.12	0.19	0.18	0.27	0.38	0.31	0.38	0.163333	0.335	0.19	0.38	0.12	0.27	up
chr8:134346077:134345981|134345968:-@chr8:134343472:134343592:-	NDRG1	0.64	0.62	0.73	0.82	0.74	0.82	0.78	0.663333	0.79	0.73	0.82	0.62	0.74	up
chr8:143482370:143482507:-@chr8:143433905:143434031:-@chr8:143423234:143423740:-@chr8:143411022:143411099:-	TSNARE1	0.58	0.72	0.58	0.79	0.79	0.79	0.79	0.626667	0.79	0.72	0.79	0.58	0.79	up
chr8:144962767:144963183:-@chr8:144961710:144961772:-@chr8:144961082:144961171:-	SCRIB,MIR937	0.42	0.42	0.45	0.84	0.78	0.79	0.87	0.43	0.82	0.45	0.87	0.42	0.78	up
chr8:145621137:145621963:-@chr8:145620909:145621010:-	VPS28	0.31	0.17	0.34	0.59	0.53	0.64	0.51	0.273333	0.5675	0.34	0.64	0.17	0.51	up
chr8:145714563:145715007:+@chr8:145715807|145715893:145716246:+	LRRC14	0.56	0.44	0.52	0.78	0.76	0.7	0.86	0.506667	0.775	0.56	0.86	0.44	0.7	up
chr8:8131890:8132207:+@chr8:8136473:8136612:+@chr8:8139031:8139797:+	FAM86B3P	0.61	0.48	0.54	0.64	0.62	0.72	0.65	0.543333	0.6575	0.61	0.72	0.48	0.62	up
chr9:107360193:107360267:+@chr9:107375757:107375848:+@chr9:107377047:107377239:+	FKTN	0.41	0.29	0.44	0.65	0.62	0.58	0.6	0.38	0.6125	0.44	0.65	0.29	0.58	up
chr9:108732627:108732791:+@chr9:108734365|108734368:108734651:+	ZNF462	0.46	0.49	0.53	0.66	0.81	0.54	0.88	0.493333	0.7225	0.53	0.88	0.46	0.54	up
chr9:115810578:115810655:+@chr9:115818214:115818273:+@chr9:115818796:115821416:+	ZNF618	0.64	0.47	0.41	0.75	0.69	0.74	0.71	0.506667	0.7225	0.64	0.75	0.41	0.69	up
chr9:116875703:116875966:-@chr9:116848510:116848782:-@chr9:116844319:116844441:-	TNC	0.34	0.51	0.31	0.55	0.71	0.59	0.64	0.386667	0.6225	0.51	0.71	0.31	0.55	up
chr9:123084538:123084649:+@chr9:123085418:123085491:+@chr9:123102164:123102225:+@chr9:123104062:123104266:+	GSN	0.27	0.1	0.19	0.39	0.48	0.37	0.31	0.186667	0.3875	0.27	0.48	0.1	0.31	up
chr9:124270661:124271285:+@chr9:124304795:124304970:+@chr9:124408746:124409032:+	OR1J4,OR1J2,OR1N2	0.27	0.3	0.33	0.63	0.43	0.64	0.53	0.3	0.5575	0.33	0.64	0.27	0.43	up
chr9:133375111:133375270:+@chr9:133375468:133375623:+	POMT1	0.34	0.35	0.35	0.43	0.49	0.54	0.68	0.346667	0.535	0.35	0.68	0.34	0.43	up
chr9:138819035:138819089:+@chr9:138819630:138819730:+@chr9:138820351:138821140:+	CCDC183,RABL6	0.4	0.35	0.38	0.43	0.45	0.63	0.64	0.376667	0.5375	0.4	0.64	0.35	0.43	up
chr9:32979757:32980089:-@chr9:32978081:32978127:-@chr9:32977542:32977844:-	APTX	0.25	0.35	0.29	0.39	0.54	0.39	0.46	0.296667	0.445	0.35	0.54	0.25	0.39	up
chr9:38403234:38403350:-@chr9:38401388:38401546:-@chr9:38396522:38399214:-	IGFBPL1	0.66	0.88	0.74	0.97	0.97	0.89	0.89	0.76	0.93	0.88	0.97	0.66	0.89	up
chr9:70956382:70956507:+@chr9:70989823:70989940:+@chr9:71017284:71017337:+	TJP2	0.15	0.17	0.25	0.26	0.56	0.49	0.4	0.19	0.4275	0.25	0.56	0.15	0.26	up
chr9:81514358:81514434:+@chr9:81522732:81522806:+@chr9:81523457:81523706:+	TLE4	0.05	0.11	0.08	0.12	0.22	0.29	0.31	0.08	0.235	0.11	0.31	0.05	0.12	up
chr9:83457023:83456945|83456919:-@chr9:83438128:83439036:-	TLE1	0.56	0.52	0.55	0.76	0.7	0.63	0.7	0.543333	0.6975	0.56	0.76	0.52	0.63	up
chr9:87610737:87610868:+@chr9:87620614:87620998:+@chr9:87627615:87627815:+		0.39	0.38	0.42	0.64	0.54	0.53	0.63	0.396667	0.585	0.42	0.64	0.38	0.53	up
chrX:118647309:118647499:-@chrX:118636704:118636777:-@chrX:118633715:118634733:-	SEPT6	0.31	0.25	0.28	0.58	0.4	0.52	0.48	0.28	0.495	0.31	0.58	0.25	0.4	up
chrX:134538784:134539018|134538886:+@chrX:134541379:134541753:+	INTS6L	0.4	0.4	0.26	0.5	0.53	0.41	0.62	0.353333	0.515	0.4	0.62	0.26	0.41	up
chrX:135787888:135787911:-@chrX:135787740:135787784:-	RBMX	0.49	0.44	0.44	0.54	0.57	0.52	0.67	0.456667	0.575	0.49	0.67	0.44	0.52	up
chrX:15176978:15176726|15176722:-@chrX:15172030:15172673:-	ASB9	0.2	0.19	0.18	0.43	0.33	0.41	0.24	0.19	0.3525	0.2	0.43	0.18	0.24	up
chrX:17789139:17789392:-@chrX:17765578:17765771:-@chrX:17757168:17757310:-@chrX:17728086:17730075:-	RAI2	0.12	0.43	0.44	0.49	0.47	0.55	0.52	0.33	0.5075	0.44	0.55	0.12	0.47	up
chrX:23711838:23712129|23711921:+@chrX:23713366:23713467:+	SAT1	0.29	0.24	0.36	0.45	0.66	0.43	0.45	0.296667	0.4975	0.36	0.66	0.24	0.43	up
chrX:23711838:23712441|23711921:+@chrX:23713366:23713467:+	SAT1	0.37	0.31	0.32	0.45	0.81	0.59	0.5	0.333333	0.5875	0.37	0.81	0.31	0.45	up
chrX:48738606:48738740:-@chrX:48734784:48734934:-@chrX:48732282:48732458:-@chrX:48732041:48732088:-	GRIPAP1	0.3	0.32	0.19	0.33	0.48	0.43	0.38	0.27	0.405	0.32	0.48	0.19	0.33	up
chrX:53729940:53730038:-@chrX:53727850:53727989:-@chrX:53723727:53723864:-	HUWE1	0.06	0.13	0.12	0.32	0.18	0.14	0.32	0.103333	0.24	0.13	0.32	0.06	0.14	up
chrX:64661570:64661655:-@chrX:64661169:64661219:-@chrX:64660661:64660867:-	LAS1L	0.11	0.19	0.15	0.44	0.3	0.42	0.42	0.15	0.395	0.19	0.44	0.11	0.3	up
chr10:100183838:100183730|100183687:-@chr10:100180878:100181038:-	MIR4685,HPS1	0.32	0.27	0.37	0.22	0.21	0.12	0.23	0.32	0.195	0.37	0.23	0.27	0.12	down
chr10:102123297:102123759:+@chr10:102130730:102130856:+@chr10:102130963:102133287:+		0.67	0.56	0.58	0.54	0.52	0.51	0.43	0.603333	0.5	0.67	0.54	0.56	0.43	down
chr10:105757925:105758104:+@chr10:105760564:105760656:+@chr10:105767908:105768037:+	SLK	0.18	0.29	0.24	0.06	0.03	0.02	0.05	0.236667	0.04	0.29	0.06	0.18	0.02	down
chr10:112626418:112626501:+@chr10:112630981|112631023:112631283:+	PDCD4,MIR4680	0.79	0.78	0.82	0.76	0.65	0.61	0.68	0.796667	0.675	0.82	0.76	0.78	0.61	down
chr10:114907522:114907818:+@chr10:114910368:114910440:+@chr10:114915304:114917427:+	TCF7L2	0.79	0.66	0.5	0.35	0.4	0.48	0.46	0.65	0.4225	0.79	0.48	0.5	0.35	down
chr10:127404241:127404397:+@chr10:127407562:127407663:+@chr10:127407917:127408038:+	EDRF1	0.77	0.66	0.71	0.45	0.46	0.55	0.42	0.713333	0.47	0.77	0.55	0.66	0.42	down
chr10:134975210:134975335|134975310:+@chr10:134976282:134976656:+	ZNF511	0.93	0.93	0.92	0.71	0.76	0.86	0.9	0.926667	0.8075	0.93	0.9	0.92	0.71	down
chr10:13668818:13669158:+@chr10:13673774:13673894:+@chr10:13679464:13679541:+	PRPF18	0.25	0.26	0.34	0.14	0.13	0.14	0.22	0.283333	0.1575	0.34	0.22	0.25	0.13	down
chr10:51555823:51555945:+@chr10:51556926:51556988:+@chr10:51557349:51557561:+	FAM21A	0.94	0.96	0.94	0.78	0.83	0.65	0.78	0.946667	0.76	0.96	0.83	0.94	0.65	down
chr10:73703683:73703824:+@chr10:73703989:73704185:+@chr10:73704459:73705837:+	DDIT4	0.9	0.93	0.9	0.84	0.79	0.78	0.82	0.91	0.8075	0.93	0.84	0.9	0.78	down
chr10:99486854:99487068:+@chr10:99492841:99492911:+@chr10:99494476:99494695:+	ZFYVE27	0.91	0.91	0.91	0.72	0.68	0.72	0.89	0.91	0.7525	0.91	0.89	0.91	0.68	down
chr11:112337145:112337596:+@chr11:112578311:112578385:+@chr11:112580218:112580436:+	NCAM1	0.92	0.95	0.96	0.9	0.77	0.74	0.86	0.943333	0.8175	0.96	0.9	0.92	0.74	down
chr11:113209352:113209489:-@chr11:113207852:113207925:-@chr11:113206799:113206875:-	USP28	0.89	0.84	0.87	0.8	0.76	0.67	0.82	0.866667	0.7625	0.89	0.82	0.84	0.67	down
chr11:117217073:117217109:-@chr11:117216269:117216293:-@chr11:117212903:117215755:-	FXYD6,FXYD6-FXYD2	0.52	0.43	0.65	0.35	0.35	0.26	0.42	0.533333	0.345	0.65	0.42	0.43	0.26	down
chr11:118406769:118406826:-@chr11:118406152:118406655:-@chr11:118403548:118405484:-	SLC37A4	0.51	0.5	0.48	0.25	0.3	0.22	0.24	0.496667	0.2525	0.51	0.3	0.48	0.22	down
chr11:123997953:124001009:+@chr11:124001579:124001715:+@chr11:124002010:124002156:+	TBRG1	0.66	0.61	0.61	0.52	0.56	0.46	0.35	0.626667	0.4725	0.66	0.56	0.61	0.35	down
chr11:129497333:129497618:+@chr11:129498717:129498884:+@chr11:129501805:129501935:+	APLP2	0.44	0.47	0.42	0.26	0.3	0.25	0.32	0.443333	0.2825	0.47	0.32	0.42	0.25	down
chr11:129565559:129565799|129565794:+@chr11:129569254:129569393:+	ST14	0.99	1	0.99	0.94	0.85	0.86	0.87	0.993333	0.88	1	0.94	0.99	0.85	down
chr11:17055600:17055561|17055552:-@chr11:17054314:17055369:-	RPS13	0.84	0.84	0.74	0.58	0.5	0.56	0.67	0.806667	0.5775	0.84	0.67	0.74	0.5	down
chr11:1732708:1732834:-@chr11:1731937|1731944:1731800:-	CTSD	0.74	0.77	0.79	0.67	0.58	0.71	0.7	0.766667	0.665	0.79	0.71	0.74	0.58	down
chr11:18504898:18505354:-@chr11:18503784:18503825:-@chr11:18497642:18497726:-	TSG101	0.36	0.31	0.48	0.12	0.24	0.16	0.3	0.383333	0.205	0.48	0.3	0.31	0.12	down
chr11:20033821:20034079:+@chr11:20034652:20034750:+@chr11:20040429:20040481:+	NAV2	0.26	0.26	0.25	0.11	0.13	0.19	0.11	0.256667	0.135	0.26	0.19	0.25	0.11	down
chr11:35167785:35168188:+@chr11:35176244:35176369:+@chr11:35179205:35179318:+	CD44	0.85	0.81	0.85	0.15	0.17	0.15	0.19	0.836667	0.165	0.85	0.19	0.81	0.15	down
chr11:35167785:35168188:+@chr11:35176244:35176369:+@chr11:35188088:35188177:+@chr11:35192975:35193037:+	CD44	0.95	0.96	0.95	0.29	0.39	0.47	0.5	0.953333	0.4125	0.96	0.5	0.95	0.29	down
chr11:35167785:35168188:+@chr11:35176244|35176271:35176369:+	CD44	0.96	0.97	0.97	0.35	0.32	0.35	0.21	0.966667	0.3075	0.97	0.35	0.96	0.21	down
chr11:35167785:35168188:+@chr11:35176271:35176369:+@chr11:35179205:35179318:+	CD44	0.66	0.56	0.52	0.04	0.22	0.08	0.25	0.58	0.1475	0.66	0.25	0.52	0.04	down
chr11:35167785:35168188:+@chr11:35179205:35179318:+@chr11:35182635:35182782:+	CD44	0.47	0.38	0.34	0.07	0.12	0.11	0.13	0.396667	0.1075	0.47	0.13	0.34	0.07	down
chr11:35167785:35168188:+@chr11:35182635:35182763:+@chr11:35184235:35184366:+	CD44	0.89	0.88	0.88	0.32	0.45	0.23	0.39	0.883333	0.3475	0.89	0.45	0.88	0.23	down
chr11:35167785:35168188:+@chr11:35184235:35184366:+@chr11:35186228:35186329:+	CD44	0.15	0.25	0.37	0.05	0.12	0.04	0.04	0.256667	0.0625	0.37	0.12	0.15	0.04	down
chr11:35167785:35168188:+@chr11:35186228:35186329:+@chr11:35188088:35188177:+	CD44	0.89	0.97	0.93	0.15	0.22	0.17	0.35	0.93	0.2225	0.97	0.35	0.89	0.15	down
chr11:35167785:35168188:+@chr11:35188088:35188177:+@chr11:35189369:35190301:+	CD44	0.88	0.86	0.91	0.26	0.37	0.51	0.25	0.883333	0.3475	0.91	0.51	0.86	0.25	down
chr11:35167958:35168095:+@chr11:35189369:35189572:+@chr11:35192975:35193037:+	CD44	0.77	0.81	0.75	0.72	0.54	0.66	0.61	0.776667	0.6325	0.81	0.72	0.75	0.54	down
chr11:35179205:35179318:+@chr11:35179791:35179910:+@chr11:35182635:35182782:+	CD44	0.94	0.97	0.94	0.69	0.64	0.73	0.68	0.95	0.685	0.97	0.73	0.94	0.64	down
chr11:35179205:35179318:+@chr11:35179794:35179910:+@chr11:35182635:35182782:+	CD44	0.93	0.97	0.95	0.56	0.59	0.68	0.68	0.95	0.6275	0.97	0.68	0.93	0.56	down
chr11:397062:397197:-@chr11:396843:396993:-@chr11:395716:396538:-	SIGIRR	0.9	0.79	0.82	0.69	0.57	0.53	0.76	0.836667	0.6375	0.9	0.76	0.79	0.53	down
chr11:63277710:63277756:+@chr11:63280160:63280222:+@chr11:63282204:63283939:+	RTN3	0.82	0.87	0.79	0.67	0.78	0.73	0.7	0.826667	0.72	0.87	0.78	0.79	0.67	down
chr11:71458536:71458787:-@chr11:71456773:71456925:-@chr11:71424596:71424669:-	NUMA1	0.58	0.3	0.4	0.2	0.24	0.27	0.17	0.426667	0.22	0.58	0.27	0.3	0.17	down
chr11:71458536:71458787:-@chr11:71456799:71456925:-@chr11:71424596:71424669:-	NUMA1	0.58	0.51	0.48	0.26	0.36	0.34	0.31	0.523333	0.3175	0.58	0.36	0.48	0.26	down
chr11:72082018:72082163:-@chr11:72081446:72081478:-@chr11:72077148:72077230:-	ARAP1	0.79	0.8	0.88	0.69	0.72	0.69	0.58	0.823333	0.67	0.88	0.72	0.79	0.58	down
chr11:86212024:86212283:+@chr11:86322800:86322946:+@chr11:86327710:86327816:+	PRSS23	0.18	0.25	0.15	0.02	0.12	0.03	0.03	0.193333	0.05	0.25	0.12	0.15	0.02	down
chr11:8889316:8889794:+@chr11:8890576:8890656:+@chr11:8892949:8893053:+	AKIP1	0.76	0.67	0.66	0.64	0.59	0.57	0.49	0.696667	0.5725	0.76	0.64	0.66	0.49	down
chr12:1089619:1089774:+@chr12:1091642:1091725:+@chr12:1095293:1095622:+	ERC1	0.64	0.64	0.62	0.5	0.5	0.42	0.51	0.633333	0.4825	0.64	0.51	0.62	0.42	down
chr12:119137583:119137603:-@chr12:119137289:119137459:-	PXN	0.87	0.9	0.88	0.83	0.82	0.59	0.77	0.883333	0.7525	0.9	0.83	0.87	0.59	down
chr12:123385982:123386889:-@chr12:123385116|123385779:123384923:-	NCOR2	0.81	0.81	0.86	0.67	0.53	0.74	0.77	0.826667	0.6775	0.86	0.77	0.81	0.53	down
chr12:123412625:123412796:-@chr12:123407281|123407302:123407141:-	NCOR2	0.9	0.86	0.85	0.81	0.6	0.8	0.71	0.87	0.73	0.9	0.81	0.85	0.6	down
chr12:131940090:131940763:-@chr12:131938393|131938396:131938277:-	CHFR	0.71	0.64	0.8	0.6	0.34	0.26	0.17	0.716667	0.3425	0.8	0.6	0.64	0.17	down
chr12:49728347:49729235:+@chr12:49733828:49733910:+@chr12:49735885:49736552:+	LETMD1	0.75	0.86	0.74	0.62	0.54	0.73	0.53	0.783333	0.605	0.86	0.73	0.74	0.53	down
chr12:52869002:52869042:-@chr12:52863816:52864010:-@chr12:52859616:52862674:-	SMUG1	0.69	0.74	0.77	0.61	0.51	0.62	0.63	0.733333	0.5925	0.77	0.63	0.69	0.51	down
chr12:54400418:54400568:+@chr12:54401199|54401204:54401545:+	RDH5	0.51	0.53	0.51	0.24	0.49	0.45	0.38	0.516667	0.39	0.53	0.49	0.51	0.24	down
chr12:54840294:54840371:+@chr12:54840677:54840721:+@chr12:54841438:54841633:+	MYL6	0.61	0.62	0.73	0.47	0.53	0.44	0.38	0.653333	0.455	0.73	0.53	0.61	0.38	down
chr12:55034665:55034517|55034470:-@chr12:55031254:55031501:-	STAT2	0.23	0.14	0.24	0.11	0.11	0.11	0.06	0.203333	0.0975	0.24	0.11	0.14	0.06	down
chr12:55155095:55155234:-@chr12:55154897:55154947:-@chr12:55152959:55154771:-	GLS2	0.93	0.97	0.95	0.86	0.57	0.73	0.84	0.95	0.75	0.97	0.86	0.93	0.57	down
chr12:55159831:55159952:-@chr12:55159103:55159232:-@chr12:55158234:55158313:-	GLS2	0.82	0.84	0.91	0.68	0.73	0.77	0.7	0.856667	0.72	0.91	0.77	0.82	0.68	down
chr12:56426226:56426306:+@chr12:56426639:56426770:+	TSPAN31	0.27	0.54	0.33	0.21	0.19	0.18	0.17	0.38	0.1875	0.54	0.21	0.27	0.17	down
chr12:78708378:78708394:-@chr12:78707509:78707591:-@chr12:78704688:78706694:-	PPP1R12A	0.52	0.46	0.64	0.41	0.31	0.26	0.43	0.54	0.3525	0.64	0.43	0.46	0.26	down
chr12:88443028:88443495:-@chr12:88414947:88415250:-@chr12:88409844:88410023:-	GALNT4,POC1B-GALNT4,POC1B	0.56	0.71	0.63	0.44	0.53	0.54	0.55	0.633333	0.515	0.71	0.55	0.56	0.44	down
chr12:895771:896247:-@chr12:893956|893959:893858:-	RAD52	0.86	0.85	0.81	0.67	0.71	0.69	0.59	0.84	0.665	0.86	0.71	0.81	0.59	down
chr12:9700431:9700560|9700512:+@chr12:9700784:9702285:+	LOC374443,CLEC2D	0.66	0.65	0.52	0.47	0.33	0.5	0.49	0.61	0.4475	0.66	0.5	0.52	0.33	down
chr13:110094418:110094530:-@chr13:110092663:110092869:-	CARS2	0.73	0.75	0.82	0.66	0.68	0.51	0.67	0.766667	0.63	0.82	0.68	0.73	0.51	down
chr13:27093474:27094146|27093574:+@chr13:27120516:27120590:+	POLR1D	0.83	0.83	0.78	0.75	0.57	0.73	0.74	0.813333	0.6975	0.83	0.75	0.78	0.57	down
chr13:37822136:37822364|37822192:+@chr13:37826376:37827841:+	UFM1	0.72	0.65	0.61	0.29	0.23	0.36	0.22	0.66	0.275	0.72	0.36	0.61	0.22	down
chr13:40137720:40138761:-@chr13:40105284:40105385:-@chr13:40034826:40034899:-@chr13:40031646:40032997:-	FOXO1	0.43	0.25	0.46	0.21	0.22	0.21	0.15	0.38	0.1975	0.46	0.22	0.25	0.15	down
chr13:51869368:51870370:-@chr13:51858164:51858322:-@chr13:51849303:51850925:-	THSD1	0.66	0.46	0.52	0.42	0.33	0.44	0.32	0.546667	0.3775	0.66	0.44	0.46	0.32	down
chr14:101768625:101769879:-@chr14:101761185:101762498:-@chr14:101760590:101760884:-	MOK	0.5	0.75	0.52	0.43	0.29	0.26	0.44	0.59	0.355	0.75	0.44	0.5	0.26	down
chr14:103003169:103003281:+@chr14:103004123|103004171:103004276:+	MARK3	0.91	0.9	0.85	0.78	0.83	0.79	0.7	0.886667	0.775	0.91	0.83	0.85	0.7	down
chr14:103457560:103457656:-@chr14:103457030:103457298:-@chr14:103454095:103454214:-@chr14:103450818:103451279:-	C14orf2	0.8	0.73	0.75	0.7	0.45	0.58	0.55	0.76	0.57	0.8	0.7	0.73	0.45	down
chr14:104251585:104252238:+@chr14:104252666:104252722:+@chr14:104256177:104256994:+	INF2	0.93	0.98	0.96	0.73	0.69	0.75	0.77	0.956667	0.735	0.98	0.77	0.93	0.69	down
chr14:18750595:18750685:+@chr14:18760487:18760609:+@chr14:18761355:18765309:+	DUXAP10	0.41	0.3	0.32	0.2	0.21	0.18	0.09	0.343333	0.17	0.41	0.21	0.3	0.09	down
chr14:23095038:23095392:+@chr14:23095792:23096353:+@chr14:23097744:23100010:+	THTPA	0.75	0.69	0.81	0.67	0.56	0.59	0.62	0.75	0.61	0.81	0.67	0.69	0.56	down
chr14:23183458:23183592:+@chr14:23183876:23183935:+@chr14:23184191:23184701:+	DHRS2	0.81	0.86	0.91	0.79	0.67	0.39	0.79	0.86	0.66	0.91	0.79	0.81	0.39	down
chr14:23687307:23687526|23687462:+@chr14:23687691:23687750:+	RNF31	0.5	0.32	0.35	0.3	0.26	0.24	0.14	0.39	0.235	0.5	0.3	0.32	0.14	down
chr14:65152682:65152844:+@chr14:65153561:65153662:+@chr14:65165963:65166350:+	FUT8	0.25	0.26	0.35	0.1	0.24	0.15	0.11	0.286667	0.15	0.35	0.24	0.25	0.1	down
chr14:67098424:67099364:+@chr14:67105608|67105611:67105686:+	PLEKHH1	0.82	0.86	0.82	0.69	0.72	0.73	0.76	0.833333	0.725	0.86	0.76	0.82	0.69	down
chr14:72818820:72818966:-@chr14:72815742:72815885:-@chr14:72811568:72813754:-	NUMB,LOC101928143	0.81	0.78	0.88	0.58	0.66	0.59	0.62	0.823333	0.6125	0.88	0.66	0.78	0.58	down
chr14:94975123:94975252:-@chr14:94973056|94973071:94972910:-	SYNE3	0.89	0.8	0.86	0.78	0.76	0.73	0.63	0.85	0.725	0.89	0.78	0.8	0.63	down
chr15:100323778:100323949:+@chr15:100329549:100329775:+@chr15:100330309:100330420:+		0.27	0.27	0.34	0.18	0.21	0.14	0.24	0.293333	0.1925	0.34	0.24	0.27	0.14	down
chr15:38932614:38932741:+@chr15:38932979|38932981:38933117:+	SPINT1	0.94	0.98	0.96	0.85	0.79	0.68	0.72	0.96	0.76	0.98	0.85	0.94	0.68	down
chr15:38932614:38932741:+@chr15:38932979|38933039:38933117:+	SPINT1	0.93	0.98	0.94	0.88	0.84	0.75	0.82	0.95	0.8225	0.98	0.88	0.93	0.75	down
chr15:38932614:38932741:+@chr15:38932981|38933039:38933117:+	SPINT1	0.91	0.96	0.9	0.85	0.72	0.81	0.8	0.923333	0.795	0.96	0.85	0.9	0.72	down
chr15:38933201:38933371:+@chr15:38933550:38933576:+@chr15:38933887:38934179:+	SPINT1	0.87	0.95	0.94	0.78	0.49	0.61	0.74	0.92	0.655	0.95	0.78	0.87	0.49	down
chr15:40765036:40773832:+@chr15:40773950|40774018:40774215:+	STARD9	0.36	0.23	0.27	0.19	0.22	0.13	0.08	0.286667	0.155	0.36	0.22	0.23	0.08	down
chr15:61141828:61141897:+@chr15:61143316:61143442:+@chr15:61145148:61151164:+	TPM1	0.32	0.32	0.4	0.19	0.31	0.31	0.15	0.346667	0.24	0.4	0.31	0.32	0.15	down
chr15:63567081:63567209:-@chr15:63564490:63564551:-@chr15:63553600:63553679:-@chr15:63546462:63546614:-	DPP8	0.81	0.87	0.9	0.75	0.78	0.56	0.69	0.86	0.695	0.9	0.78	0.81	0.56	down
chr15:71999432:71999354|71999232:-@chr15:71996519:71998777:-	LOXL1-AS1	0.84	0.75	0.76	0.49	0.38	0.3	0.17	0.783333	0.335	0.84	0.49	0.75	0.17	down
chr15:72985981:72986515:-@chr15:72985672:72985759:-@chr15:72984058:72984625:-	FAM219B	0.85	0.83	0.82	0.67	0.8	0.63	0.77	0.833333	0.7175	0.85	0.8	0.82	0.63	down
chr15:88577905:88577939:-@chr15:88576455:88576563:-@chr15:88575331:88575743:-	CIB1	0.85	0.93	0.9	0.78	0.79	0.81	0.71	0.893333	0.7725	0.93	0.81	0.85	0.71	down
chr16:16335005:16335121:+@chr16:16337219:16337495:+@chr16:16341664:16341792:+	NPIPA3,NPIPA2,NPIPA5,NPIPA7,NPIPA8,LOC102724993	0.84	0.84	0.82	0.73	0.63	0.7	0.73	0.833333	0.6975	0.84	0.73	0.82	0.63	down
chr16:239549:239654:+@chr16:244329|244381:244681:+	FAM234A	0.32	0.32	0.2	0.19	0.1	0.17	0.13	0.28	0.1475	0.32	0.19	0.2	0.1	down
chr16:3646640:3646755:+@chr16:3647001|3647164:3647343:+	DNASE1	0.82	0.82	0.89	0.55	0.73	0.76	0.79	0.843333	0.7075	0.89	0.79	0.82	0.55	down
chr16:3768013:3768778:-@chr16:3767615:3767659:-@chr16:3764571:3764695:-	CREBBP	0.87	0.86	0.74	0.68	0.69	0.7	0.69	0.823333	0.69	0.87	0.7	0.74	0.68	down
chr16:55777234:55777477:-@chr16:55766952:55767003:-@chr16:55766033:55766101:-@chr16:55765141:55765282:-	FAM192A	0.22	0.26	0.37	0.1	0.16	0.18	0.17	0.283333	0.1525	0.37	0.18	0.22	0.1	down
chr16:626095:626367:-@chr16:625282:625341:-@chr16:624890:624957:-	METTL26	0.79	0.89	0.78	0.73	0.55	0.66	0.77	0.82	0.6775	0.89	0.77	0.78	0.55	down
chr16:66535352:66536624:-@chr16:66534593|66534616:66534460:-	LCAT,SLC12A4	0.67	0.85	0.71	0.5	0.52	0.62	0.64	0.743333	0.57	0.85	0.64	0.67	0.5	down
chr16:70400167:70400506:-@chr16:70399909:70400081:-@chr16:70399026:70399554:-	AP1G1	0.52	0.45	0.47	0.36	0.43	0.22	0.33	0.48	0.335	0.52	0.43	0.45	0.22	down
chr16:87452528:87452698|87452661:+@chr16:87453572:87455010:+	TRAPPC2L	0.84	0.85	0.89	0.75	0.61	0.78	0.68	0.86	0.705	0.89	0.78	0.84	0.61	down
chr17:16306297:16306425:-@chr17:16291884:16291999:-@chr17:16285405:16288170:-	LRRC75A	0.82	0.89	0.85	0.79	0.73	0.57	0.77	0.853333	0.715	0.89	0.79	0.82	0.57	down
chr17:19496452:19496537:+@chr17:19499186:19499292:+@chr17:19500271:19500479:+	ALDH3A2	0.14	0.21	0.3	0.09	0.08	0.08	0.11	0.216667	0.09	0.3	0.11	0.14	0.08	down
chr17:33018869:33018980:-@chr17:33013341:33013643:-@chr17:33011591:33011824:-		0.59	0.7	0.74	0.49	0.38	0.47	0.57	0.676667	0.4775	0.74	0.57	0.59	0.38	down
chr17:36928108:36932191:-@chr17:36926742|36926943:36926586:-	KRT15,MIR6510	0.8	0.85	0.85	0.74	0.53	0.49	0.7	0.833333	0.615	0.85	0.74	0.8	0.49	down
chr17:36928108:36932191:-@chr17:36926861:36926943:-@chr17:36926586:36926742:-	KRT15,MIR6510	0.89	0.98	0.94	0.82	0.71	0.4	0.81	0.936667	0.685	0.98	0.82	0.89	0.4	down
chr17:38133206:38133307:-@chr17:38129849:38129968:-@chr17:38128336:38128459:-	EZH1	0.76	0.81	0.85	0.69	0.75	0.64	0.6	0.806667	0.67	0.85	0.75	0.76	0.6	down
chr17:38509665:38509804:-@chr17:38505420|38505423:38505318:-	BRCA1	0.83	0.77	0.76	0.58	0.63	0.62	0.63	0.786667	0.615	0.83	0.63	0.76	0.58	down
chr17:38978755:38978918:-@chr17:38978261|38978562:38978168:-	ETV4	0.81	0.84	0.85	0.8	0.63	0.66	0.59	0.833333	0.67	0.85	0.8	0.81	0.59	down
chr17:40829734:40829636|40829356:-@chr17:40828893:40829266:-	ARHGAP27	0.65	0.74	0.78	0.51	0.59	0.5	0.53	0.723333	0.5325	0.78	0.59	0.65	0.5	down
chr17:5230752:5230870:-@chr17:5230182:5230313:-@chr17:5204988:5206105:-	NUP88	0.58	0.6	0.7	0.5	0.37	0.43	0.47	0.626667	0.4425	0.7	0.5	0.58	0.37	down
chr17:70279952:70280011:-@chr17:70279694:70279785:-	NAT9	0.75	0.77	0.84	0.7	0.64	0.71	0.57	0.786667	0.655	0.84	0.71	0.75	0.57	down
chr17:70638795:70638747|70638655:-@chr17:70637915:70638557:-	NT5C	0.36	0.32	0.44	0.25	0.23	0.17	0.24	0.373333	0.2225	0.44	0.25	0.32	0.17	down
chr17:7104864:7106386:-@chr17:7104681:7104769:-@chr17:7102740:7104579:-	CLDN7	0.94	0.96	0.93	0.45	0.36	0.25	0.68	0.943333	0.435	0.96	0.68	0.93	0.25	down
chr17:7104864:7106386:-@chr17:7104685:7104769:-@chr17:7102740:7104579:-	CLDN7	0.97	0.99	0.96	0.7	0.54	0.43	0.77	0.973333	0.61	0.99	0.77	0.96	0.43	down
chr17:71210155:71210246:+@chr17:71211483:71211534:+@chr17:71212431:71214446:+	SAP30BP	0.67	0.87	0.81	0.59	0.39	0.62	0.65	0.783333	0.5625	0.87	0.65	0.67	0.39	down
chr17:71507817:71508165:+@chr17:71509088:71509217:+	CDK3,CDK3,TEN1,TEN1-CDK3,TEN1	0.66	0.38	0.51	0.34	0.35	0.29	0.3	0.516667	0.32	0.66	0.35	0.38	0.29	down
chr17:71602090:71602257:-@chr17:71598005:71598073:-@chr17:71596851:71596996:-	EXOC7	0.35	0.48	0.66	0.24	0.25	0.18	0.27	0.496667	0.235	0.66	0.27	0.35	0.18	down
chr17:7517744:7518064:-@chr17:7517651|7517687:7517578:-	TP53	0.63	0.21	0.25	0.19	0.18	0.2	0.13	0.363333	0.175	0.63	0.2	0.21	0.13	down
chr17:76696859:76696904:+@chr17:76699309:76699354:+@chr17:76704165:76704620:+	BAIAP2	0.59	0.64	0.48	0.42	0.29	0.29	0.2	0.57	0.3	0.64	0.42	0.48	0.2	down
chr17:76699309:76699354|76699350:+@chr17:76704165:76704620:+	BAIAP2	0.77	0.79	0.78	0.54	0.56	0.36	0.47	0.78	0.4825	0.79	0.56	0.77	0.36	down
chr17:77260448:77261168:-@chr17:77259584|77260110:77259469:-	ARL16	0.82	0.81	0.88	0.69	0.73	0.56	0.74	0.836667	0.68	0.88	0.74	0.81	0.56	down
chr17:77260448:77261168:-@chr17:77259878:77260110:-@chr17:77259469:77259584:-	ARL16	0.77	0.75	0.83	0.56	0.65	0.54	0.64	0.783333	0.5975	0.83	0.65	0.75	0.54	down
chr17:77260448:77261168:-@chr17:77259926:77260110:-@chr17:77259469:77259584:-	ARL16	0.81	0.76	0.81	0.56	0.7	0.47	0.68	0.793333	0.6025	0.81	0.7	0.76	0.47	down
chr17:7990415:7990545:-@chr17:7990001:7990180:-@chr17:7986990:7989036:-	PER1,MIR6883	0.91	0.86	0.88	0.81	0.71	0.66	0.71	0.883333	0.7225	0.91	0.81	0.86	0.66	down
chr17:8018659:8018584|8018563:-@chr17:8016260:8018315:-	SNORD118,TMEM107	0.74	0.88	0.73	0.66	0.68	0.53	0.5	0.783333	0.5925	0.88	0.68	0.73	0.5	down
chr18:12784383:12784484:-@chr18:12783481:12783573:-@chr18:12778064:12778149:-@chr18:12775476:12775843:-	PTPN2	0.65	0.7	0.78	0.52	0.39	0.63	0.64	0.71	0.545	0.78	0.64	0.65	0.39	down
chr18:43711169:43711561:-@chr18:43700441:43700538:-@chr18:43676890:43677178:-	SMAD2	0.2	0.25	0.28	0.12	0.14	0.11	0.15	0.243333	0.13	0.28	0.15	0.2	0.11	down
chr19:13737768:13737943|13737879:+@chr19:13740173:13740551:+	MRI1	0.77	0.75	0.74	0.61	0.71	0.51	0.58	0.753333	0.6025	0.77	0.71	0.74	0.51	down
chr19:1384738:1384826:+@chr19:1385736|1385739:1386680:+	DAZAP1	0.78	0.84	0.77	0.76	0.62	0.53	0.34	0.796667	0.5625	0.84	0.76	0.77	0.34	down
chr19:13890943:13891015:+@chr19:13891631:13891764:+@chr19:13892370:13892481:+	CC2D1A	0.82	0.87	0.84	0.81	0.61	0.74	0.8	0.843333	0.74	0.87	0.81	0.82	0.61	down
chr19:17189262:17190200:+@chr19:17191022:17191198:+@chr19:17191440:17191639:+	USE1	0.9	0.93	0.92	0.87	0.83	0.67	0.88	0.916667	0.8125	0.93	0.88	0.9	0.67	down
chr19:18560805:18560887:+@chr19:18561223:18561493:+	C19orf60	0.45	0.45	0.7	0.39	0.44	0.37	0.39	0.533333	0.3975	0.7	0.44	0.45	0.37	down
chr19:41195743:41195831:-@chr19:41194146:41194206:-@chr19:41193032:41193787:-	ALKBH6	0.55	0.82	0.56	0.35	0.35	0.44	0.36	0.643333	0.375	0.82	0.44	0.55	0.35	down
chr19:47489584:47489828:+@chr19:47489927|47489930:47490081:+	CIC	0.85	0.78	0.84	0.65	0.65	0.62	0.75	0.823333	0.6675	0.85	0.75	0.78	0.62	down
chr19:48722507:48722651:-@chr19:48722193:48722308:-@chr19:48707429:48707558:-	ETHE1	0.88	0.92	0.91	0.75	0.68	0.79	0.59	0.903333	0.7025	0.92	0.79	0.88	0.59	down
chr19:48722507:48722651:-@chr19:48722193:48722341:-@chr19:48707429:48707558:-	ETHE1	0.9	0.94	0.93	0.86	0.84	0.8	0.78	0.923333	0.82	0.94	0.86	0.9	0.78	down
chr19:54684919:54684981:+@chr19:54685301:54685366:+	RPL13A,SNORD32A	0.68	0.72	0.67	0.36	0.57	0.51	0.58	0.69	0.505	0.72	0.58	0.67	0.36	down
chr19:54684919:54685159:+@chr19:54685301:54685366:+	RPL13A,SNORD32A	0.87	0.9	0.81	0.76	0.74	0.72	0.79	0.86	0.7525	0.9	0.79	0.81	0.72	down
chr19:54692263:54692437:+@chr19:54692589:54692664:+	RPS11	0.68	0.8	0.88	0.51	0.64	0.53	0.66	0.786667	0.585	0.88	0.66	0.68	0.51	down
chr19:54857017:54857397:-@chr19:54855782:54855913:-@chr19:54854638:54854902:-	IRF3	0.9	0.88	0.89	0.79	0.65	0.78	0.8	0.89	0.755	0.9	0.8	0.88	0.65	down
chr19:54859622:54859795:-@chr19:54858327|54858583:54858257:-	IRF3	0.74	0.79	0.77	0.72	0.54	0.67	0.66	0.766667	0.6475	0.79	0.72	0.74	0.54	down
chr19:54861754:54861868:+@chr19:54862088|54862091:54862230:+	BCL2L12	0.9	0.89	0.87	0.74	0.83	0.83	0.6	0.886667	0.75	0.9	0.83	0.87	0.6	down
chr19:62807457:62807586:+@chr19:62808866:62811007:+@chr19:62815683:62815899:+	ZNF530	0.87	0.85	0.83	0.65	0.73	0.75	0.7	0.85	0.7075	0.87	0.75	0.83	0.65	down
chr19:63386676:63387177:+@chr19:63388876:63389017:+@chr19:63390126:63390221:+	ZNF274	0.79	0.87	0.72	0.69	0.7	0.7	0.68	0.793333	0.6925	0.87	0.7	0.72	0.68	down
chr1:11255808:11256704:+@chr1:11268288:11268376:+@chr1:11277517:11278212:+	UBIAD1	0.84	0.89	0.9	0.7	0.46	0.79	0.76	0.876667	0.6775	0.9	0.79	0.84	0.46	down
chr1:150255106:150255175:+@chr1:150256000:150257628:+@chr1:150257727:150257937:+		0.84	0.79	0.77	0.61	0.68	0.69	0.67	0.8	0.6625	0.84	0.69	0.77	0.61	down
chr1:152207622:152207782|152207739:+@chr1:152208030:152208555:+	CREB3L4	0.6	0.6	0.53	0.51	0.31	0.45	0.49	0.576667	0.44	0.6	0.51	0.53	0.31	down
chr1:152207622:152207799|152207739:+@chr1:152208030:152208555:+	CREB3L4	0.76	0.84	0.76	0.67	0.42	0.48	0.65	0.786667	0.555	0.84	0.67	0.76	0.42	down
chr1:152507289:152508054:+@chr1:152508462:152508512:+@chr1:152509300:152510394:+	UBAP2L	0.36	0.36	0.77	0.28	0.33	0.23	0.28	0.496667	0.28	0.77	0.33	0.36	0.23	down
chr1:153561517:153561905:+@chr1:153562016:153562087:+@chr1:153562279:153563547:+	RUSC1	0.82	0.75	0.86	0.69	0.68	0.41	0.68	0.81	0.615	0.86	0.69	0.75	0.41	down
chr1:159236050:159236161:-@chr1:159235457:159235505:-@chr1:159231625:159235320:-	F11R	0.93	0.98	0.91	0.87	0.45	0.88	0.88	0.94	0.77	0.98	0.88	0.91	0.45	down
chr1:166009097:166009229:+@chr1:166011925:166012027:+@chr1:166023681:166027780:+	MPZL1	0.83	0.83	0.77	0.73	0.61	0.74	0.69	0.81	0.6925	0.83	0.74	0.77	0.61	down
chr1:207877876:207877949:-@chr1:207874415:207874606:-@chr1:207873038:207873101:-	LAMB3,MIR4260	0.82	0.88	0.81	0.72	0.56	0.64	0.76	0.836667	0.67	0.88	0.76	0.81	0.56	down
chr1:210619860:210620002:-@chr1:210617523:210617671:-@chr1:210615154:210615265:-	TMEM206	0.89	0.78	0.79	0.77	0.68	0.7	0.67	0.82	0.705	0.89	0.77	0.78	0.67	down
chr1:21092597:21092739:-@chr1:21091699:21091809:-@chr1:21085281:21085451:-	EIF4G3	0.24	0.21	0.33	0.1	0.13	0.17	0.18	0.26	0.145	0.33	0.18	0.21	0.1	down
chr1:229441226:229441557:-@chr1:229431575|229431578:229431519:-	C1orf131	0.67	0.84	0.71	0.56	0.55	0.61	0.66	0.74	0.595	0.84	0.66	0.67	0.55	down
chr1:23995774:23995859:-@chr1:23995586:23995663:-@chr1:23995228:23995342:-	GALE	0.85	0.89	0.88	0.84	0.72	0.82	0.61	0.873333	0.7475	0.89	0.84	0.85	0.61	down
chr1:24176988:24177350:-@chr1:24174147|24174157:24174051:-	SRSF10	0.79	0.9	0.79	0.74	0.72	0.7	0.64	0.826667	0.7	0.9	0.74	0.79	0.64	down
chr1:26542823:26545790:-@chr1:26542369|26542371:26542324:-	AIM1L	0.83	0.89	0.84	0.65	0.6	0.6	0.53	0.853333	0.595	0.89	0.65	0.83	0.53	down
chr1:31672088:31672257:+@chr1:31674412|31674421:31674502:+	SERINC2	0.98	0.98	0.96	0.95	0.68	0.93	0.93	0.973333	0.8725	0.98	0.95	0.96	0.68	down
chr1:36416061:36416389:+@chr1:36416607|36416659:36416784:+	MAP7D1	0.8	0.78	0.79	0.76	0.73	0.51	0.71	0.79	0.6775	0.8	0.76	0.78	0.51	down
chr1:39718057:39718268:+@chr1:39719179:39719289:+@chr1:39722860:39725246:+	MACF1,KIAA0754	0.53	0.67	0.52	0.39	0.37	0.47	0.45	0.573333	0.42	0.67	0.47	0.52	0.37	down
chr1:52676480:52676595:-@chr1:52675235|52675238:52675015:-	ZCCHC11	0.77	0.77	0.72	0.69	0.57	0.7	0.53	0.753333	0.6225	0.77	0.7	0.72	0.53	down
chr1:53151014:53151477:-@chr1:53150050|53150281:53149983:-	ECHDC2	0.67	0.72	0.7	0.49	0.64	0.52	0.6	0.696667	0.5625	0.72	0.64	0.67	0.49	down
chr1:68722221:68722361:-@chr1:68720912:68721168:-@chr1:68719711:68719883:-	DEPDC1	0.76	0.74	0.86	0.62	0.67	0.61	0.69	0.786667	0.6475	0.86	0.69	0.74	0.61	down
chr1:76029734:76029844:+@chr1:76030454|76030470:76030579:+	RABGGTB	0.86	0.84	0.88	0.76	0.78	0.8	0.6	0.86	0.735	0.88	0.8	0.84	0.6	down
chr1:95482355:95482859|95482795:+@chr1:95484686:95484801:+	RWDD3	0.7	0.8	0.63	0.61	0.57	0.6	0.62	0.71	0.6	0.8	0.62	0.63	0.57	down
chr1:97051173:97051250:+@chr1:97051417|97051420:97052937:+	PTBP2	0.46	0.75	0.46	0.26	0.35	0.32	0.37	0.556667	0.325	0.75	0.37	0.46	0.26	down
chr20:30836225:30836326:+@chr20:30837969:30838094:+@chr20:30838697:30838918:+	DNMT3B	0.91	0.92	0.92	0.75	0.75	0.83	0.78	0.916667	0.7775	0.92	0.83	0.91	0.75	down
chr20:30853852:30853937:+@chr20:30857676:30857794:+@chr20:30859229:30860826:+	DNMT3B	0.7	0.5	0.56	0.33	0.37	0.36	0.42	0.586667	0.37	0.7	0.42	0.5	0.33	down
chr20:36279069:36280182:-@chr20:36278676:36278821:-@chr20:36272306:36275559:-	KIAA1755	0.74	0.44	0.71	0.24	0.26	0.42	0.4	0.63	0.33	0.74	0.42	0.44	0.24	down
chr20:42593836:42594033:+@chr20:42644640:42644786:+@chr20:42651852:42651921:+	PKIG	0.51	0.37	0.44	0.33	0.32	0.21	0.28	0.44	0.285	0.51	0.33	0.37	0.21	down
chr20:43531760:43531914:+@chr20:43532443:43532586:+@chr20:43541996:43542148:+	WFDC2	0.86	0.89	0.87	0.84	0.7	0.7	0.85	0.873333	0.7725	0.89	0.85	0.86	0.7	down
chr20:47146120:47146144:+@chr20:47146293:47146898:+	CSE1L	0.57	0.43	0.44	0.33	0.27	0.2	0.37	0.48	0.2925	0.57	0.37	0.43	0.2	down
chr20:48991975:48992144:-@chr20:48990809:48990899:-@chr20:48986092:48986206:-	DPM1	0.84	0.84	0.82	0.63	0.59	0.76	0.8	0.833333	0.695	0.84	0.8	0.82	0.59	down
chr20:5041389:5041733:-@chr20:5040410:5040454:-@chr20:5040146:5040251:-@chr20:5037804:5038091:-	TMEM230	0.29	0.27	0.28	0.14	0.26	0.15	0.12	0.28	0.1675	0.29	0.26	0.27	0.12	down
chr20:56901047:56904134:+@chr20:56907391:56907435:+@chr20:56908399:56909858:+	GNAS	0.84	0.84	0.8	0.79	0.68	0.23	0.79	0.826667	0.6225	0.84	0.79	0.8	0.23	down
chr20:61839805:61840296:+@chr20:61840395:61840567:+@chr20:61842174:61842328:+	LIME1,ZGPAT,SLC2A4RG	0.85	0.93	0.9	0.76	0.57	0.82	0.65	0.893333	0.7	0.93	0.82	0.85	0.57	down
chr20:62047958:62048064:-@chr20:62047602:62047711:-	UCKL1,MIR1914	0.68	0.72	0.62	0.44	0.46	0.58	0.54	0.673333	0.505	0.72	0.58	0.62	0.44	down
chr21:43976448:43976956|43976751:+@chr21:43978378:43978432:+	PDXK,LOC105372824	0.7	0.32	0.38	0.22	0.14	0.24	0.24	0.466667	0.21	0.7	0.24	0.32	0.14	down
chr22:17822353:17822325|17822272:-@chr22:17817103:17818267:-	UFD1L	0.79	0.88	0.75	0.68	0.66	0.74	0.6	0.806667	0.67	0.88	0.74	0.75	0.6	down
chr22:18493826:18493891:+@chr22:18494475|18494478:18494704:+	RANBP1	0.83	0.65	0.68	0.47	0.64	0.47	0.47	0.72	0.5125	0.83	0.64	0.65	0.47	down
chr22:28407428:28407590:+@chr22:28409009:28409053:+@chr22:28420741:28424593:+	NF2	0.75	0.85	0.72	0.47	0.57	0.37	0.56	0.773333	0.4925	0.85	0.57	0.72	0.37	down
chr22:29136585:29136668:+@chr22:29141748:29141854:+@chr22:29141937:29142076:+	SEC14L2,MTMR3	0.85	0.92	0.85	0.84	0.64	0.76	0.83	0.873333	0.7675	0.92	0.84	0.85	0.64	down
chr22:34384608:34385855:+@chr22:34387255:34387365:+	APOL6	0.71	0.71	0.79	0.63	0.63	0.65	0.59	0.736667	0.625	0.79	0.65	0.71	0.59	down
chr22:36790955:36791083:+@chr22:36793657:36793723:+@chr22:36794986:36795075:+	PICK1	0.87	0.83	0.85	0.73	0.48	0.7	0.82	0.85	0.6825	0.87	0.82	0.83	0.48	down
chr22:40346702:40347017:-@chr22:40333212:40333281:-@chr22:40329994:40330103:-	DESI1	0.77	0.89	0.81	0.69	0.47	0.67	0.7	0.823333	0.6325	0.89	0.7	0.77	0.47	down
chr22:44110873:44110956:+@chr22:44112379:44112513:+@chr22:44114931:44117337:+	FAM118A	0.21	0.21	0.21	0.12	0.11	0.08	0.08	0.21	0.0975	0.21	0.12	0.21	0.08	down
chr22:45024817:45025240:-@chr22:45021667:45021782:-@chr22:45018572:45019799:-	CDPF1	0.71	0.59	0.63	0.57	0.42	0.49	0.58	0.643333	0.515	0.71	0.58	0.59	0.42	down
chr22:48981535:48982146:+@chr22:48985475:48985580:+@chr22:48986873:48989272:+	SELENOO	0.53	0.55	0.7	0.4	0.44	0.48	0.51	0.593333	0.4575	0.7	0.51	0.53	0.4	down
chr22:49413240:49413473:-@chr22:49412850:49413106:-@chr22:49411885:49412700:-	ARSA	0.79	0.79	0.8	0.72	0.68	0.61	0.64	0.793333	0.6625	0.8	0.72	0.79	0.61	down
chr2:10016366:10019016:+@chr2:10020035:10020111:+@chr2:10021466:10021622:+	GRHL1	0.91	0.95	0.88	0.73	0.56	0.83	0.77	0.913333	0.7225	0.95	0.83	0.88	0.56	down
chr2:111818109:111818285:-@chr2:111722196:111722289:-@chr2:111713850:111714044:-	MIR4435-2,MIR4435-2HG	0.72	0.77	0.71	0.65	0.42	0.63	0.68	0.733333	0.595	0.77	0.68	0.71	0.42	down
chr2:139024523:139024644:+@chr2:139024943|139025014:139025094:+	SPOPL	0.88	0.86	0.88	0.76	0.66	0.8	0.79	0.873333	0.7525	0.88	0.8	0.86	0.66	down
chr2:173070949:173071074:+@chr2:173074746:173074875:+@chr2:173077065:173079433:+	ITGA6	0.8	0.89	0.82	0.56	0.68	0.56	0.62	0.836667	0.605	0.89	0.68	0.8	0.56	down
chr2:173931481:173931811:+@chr2:173932317:173932465:+@chr2:173936200:173936575:+	CDCA7	0.3	0.22	0.28	0.19	0.19	0.12	0.16	0.266667	0.165	0.3	0.19	0.22	0.12	down
chr2:178986633:178987086:+@chr2:178999339:178999653:+@chr2:179003668:179003862:+	LOC101927027	0.92	0.88	0.87	0.86	0.61	0.72	0.81	0.89	0.75	0.92	0.86	0.87	0.61	down
chr2:188865432:188866084:+@chr2:188956735|188956764:188956861:+	MIR561,GULP1	0.95	0.96	0.95	0.93	0.81	0.78	0.89	0.953333	0.8525	0.96	0.93	0.95	0.78	down
chr2:190021350:190021479:+@chr2:190021772:190021805:+@chr2:190022216:190023939:+	WDR75	0.47	0.47	0.64	0.32	0.43	0.33	0.46	0.526667	0.385	0.64	0.46	0.47	0.32	down
chr2:202052079:202052499:+@chr2:202052976|202053000:202053814:+	STRADB	0.2	0.34	0.24	0.1	0.1	0.09	0.09	0.26	0.095	0.34	0.1	0.2	0.09	down
chr2:219455127:219455389:+@chr2:219462950:219463329:+@chr2:219465740:219466907:+	WNT10A	0.87	0.88	0.92	0.44	0.57	0.41	0.75	0.89	0.5425	0.92	0.75	0.87	0.41	down
chr2:238159539:238159446|238159380:-@chr2:238151386:238151537:-	RAB17	0.89	0.94	0.91	0.8	0.75	0.62	0.81	0.913333	0.745	0.94	0.81	0.89	0.62	down
chr2:241346450:241346587:-@chr2:241345409:241345684:-@chr2:241338519:241338637:-	KIF1A	0.35	0.26	0.34	0.15	0.1	0.1	0.13	0.316667	0.12	0.35	0.15	0.26	0.1	down
chr2:48579136:48579378:+@chr2:48586207:48586239:+@chr2:48587912:48588028:+	PPP1R21	0.9	0.95	0.9	0.77	0.81	0.83	0.84	0.916667	0.8125	0.95	0.84	0.9	0.77	down
chr2:61152245:61152431:+@chr2:61154097:61154190:+@chr2:61157559:61157797:+	KIAA1841	0.89	0.86	0.8	0.74	0.63	0.62	0.61	0.85	0.65	0.89	0.74	0.8	0.61	down
chr2:71153279:71154232:+@chr2:71156193|71156200:71156280:+	NAGK	0.82	0.88	0.82	0.81	0.61	0.76	0.62	0.84	0.7	0.88	0.81	0.82	0.61	down
chr2:74509266:74509372:-@chr2:74508950|74509031:74508903:-	RTKN	0.82	0.9	0.85	0.79	0.76	0.59	0.61	0.856667	0.6875	0.9	0.79	0.82	0.59	down
chr3:115284090:115284331:+@chr3:115284500:115284540:+@chr3:115287210:115290079:+	QTRT2	0.13	0.17	0.24	0.1	0.07	0.05	0.09	0.18	0.0775	0.24	0.1	0.13	0.05	down
chr3:125157583:125157652:-@chr3:125150921:125151024:-@chr3:125150401:125150669:-	CCDC14	0.48	0.68	0.68	0.23	0.28	0.35	0.47	0.613333	0.3325	0.68	0.47	0.48	0.23	down
chr3:158352660:158355695:-@chr3:158352212:158352413:-@chr3:158349968:158350864:-	CCNL1	0.51	0.78	0.55	0.46	0.37	0.45	0.5	0.613333	0.445	0.78	0.5	0.51	0.37	down
chr3:17524970:17525101:-@chr3:17444946:17445015:-@chr3:17422914:17423022:-	TBC1D5	0.85	0.87	0.92	0.8	0.7	0.77	0.69	0.88	0.74	0.92	0.8	0.85	0.69	down
chr3:185536408:185536605:+@chr3:185537793:185537853:+@chr3:185542206:185542299:+	FAM131A,EIF2B5	0.81	0.8	0.76	0.72	0.67	0.62	0.67	0.79	0.67	0.81	0.72	0.76	0.62	down
chr3:188239224:188239355:+@chr3:188242399:188242448:+@chr3:188243136:188243864:+	ST6GAL1	0.31	0.1	0.26	0.06	0.07	0.05	0.06	0.223333	0.06	0.31	0.07	0.1	0.05	down
[truncated: 106 more rows]
