# Supplementary material for: Alternative splicing downstream of EMT enhances phenotypic plasticity and malignant behavior in colon cancer
Source: eLife. 2022 Nov 8;11:e82006. doi: 10.7554/eLife.82006 (PMC9674345; doi:10.7554/eLife.82006)
Supplement: Supplementary file 2. [file elife-82006-supp2.xlsx]

## Sheet: ESRP1_OL_with_HCT116
Supplementary File 2. List of alternative splicing targets both in ESRP1 knocking down H358 line and HCT116 EpCAMhi/lo , filtered by ΔPSI > 0.1
symbol	event_name	psi_CTRL1	psi_CTRL2	psi_CTRL3	psi_ESRP1	psi_ESRP2	psi_ESRP3	psi_mean_group1	psi_mean_group2	psi_max_group1	psi_max_group2	psi_min_group1	psi_min_group2	change_type
AAMP	chr2:218839410:218839554:-@chr2:218838546:218838913:-	0.3	0.28	0.28	0.41	0.48	0.62	0.286667	0.503333	0.3	0.62	0.28	0.41	up
ABCB8	chr7:150356443:150356630:+@chr7:150360864:150361081:+@chr7:150361463:150361624:+@chr7:150362293:150362849:+	0.52	0.57	0.49	0.75	0.64	0.58	0.526667	0.656667	0.57	0.75	0.49	0.58	up
ABI1	chr10:27094153:27094253:-@chr10:27084590:27084676:-@chr10:27080533:27080718:-	0.76	0.62	0.72	0.78	0.89	0.85	0.7	0.84	0.76	0.89	0.62	0.78	up
ACSF2	chr17:45892958:45893232:+@chr17:45893602:45893730:+@chr17:45893993:45894046:+	0.75	0.83	0.88	0.95	0.93	0.96	0.82	0.946667	0.88	0.96	0.75	0.93	up
AGTRAP	chr1:11728447:11728481:+@chr1:11728771:11728867:+@chr1:11730084:11730189:+	0.11	0.22	0.16	0.52	0.4	0.25	0.163333	0.39	0.22	0.52	0.11	0.25	up
AGTRAP	chr1:11728447:11728481:+@chr1:11728574:11728867:+@chr1:11730084:11730189:+	0.08	0.09	0.04	0.33	0.2	0.11	0.07	0.213333	0.09	0.33	0.04	0.11	up
AKAP9	chr7:91507924:91508148:+@chr7:91509296:91509436:+@chr7:91509918:91510393:+	0.31	0.33	0.3	0.41	0.56	0.42	0.313333	0.463333	0.33	0.56	0.3	0.41	up
ANKRD10	chr13:110356381:110356472:-@chr13:110351369:110351425:-@chr13:110350878:110351042:-@chr13:110343040:110343611:-	0.84	0.77	0.82	0.89	0.93	0.93	0.81	0.916667	0.84	0.93	0.77	0.89	up
ANKRD10	chr13:110356381:110356472:-@chr13:110350878:110351042:-@chr13:110344633:110344741:-@chr13:110344457:110344550:-	0.52	0.53	0.48	0.36	0.46	0.39	0.51	0.403333	0.53	0.46	0.48	0.36	down
ANKRD10	chr13:110356381:110356472:-@chr13:110353824:110353887:-@chr13:110350878:110351042:-@chr13:110343040:110343611:-	0.75	0.68	0.65	0.82	0.77	0.83	0.693333	0.806667	0.75	0.83	0.65	0.77	up
ANO9	chr11:410463:410615:-@chr11:409582:409729:-	0.69	0.68	0.57	0.42	0.46	0.4	0.646667	0.426667	0.69	0.46	0.57	0.4	down
APLP2	chr11:129497333:129497618:+@chr11:129498717:129498884:+@chr11:129501805:129501935:+	0.67	0.66	0.68	0.39	0.41	0.4	0.67	0.4	0.68	0.41	0.66	0.39	down
ARHGAP17	chr16:24860809:24860965:-@chr16:24858186:24858419:-@chr16:24854292:24854461:-	0.19	0.25	0.23	0.65	0.62	0.55	0.223333	0.606667	0.25	0.65	0.19	0.55	up
ARHGEF11	chr1:155175964:155176326:-@chr1:155174834:155174929:-@chr1:155173665:155173912:-	0.08	0.08	0.07	0.6	0.74	0.54	0.0766667	0.626667	0.08	0.74	0.07	0.54	up
ARHGEF11	chr1:155175964:155176326:-@chr1:155174834:155174875:-@chr1:155173665:155173912:-	0.09	0.09	0.14	0.35	0.31	0.41	0.106667	0.356667	0.14	0.41	0.09	0.31	up
ARL16	chr17:77260448:77261168:-@chr17:77259926:77260110:-@chr17:77259469:77259584:-	0.34	0.36	0.49	0.26	0.23	0.26	0.396667	0.25	0.49	0.26	0.34	0.23	down
ARL16	chr17:77260448:77261168:-@chr17:77259584|77260110:77259469:-	0.47	0.54	0.64	0.43	0.35	0.4	0.55	0.393333	0.64	0.43	0.47	0.35	down
ARL16	chr17:77260448:77260561:-@chr17:77259469:77260110:-	0.21	0.24	0.2	0.38	0.41	0.32	0.216667	0.37	0.24	0.41	0.2	0.32	up
ARL16	chr17:77260971:77261169:-@chr17:77259584|77260561:77259469:-	0.85	0.84	0.74	0.7	0.7	0.72	0.81	0.706667	0.85	0.72	0.74	0.7	down
ARRDC1	chr9:139627888:139627937:+@chr9:139628210|139628254:139628487:+	0.5	0.45	0.5	0.34	0.3	0.12	0.483333	0.253333	0.5	0.34	0.45	0.12	down
ASCC2	chr22:28564167:28564291:-@chr22:28558234:28558331:-@chr22:28548324:28548453:-@chr22:28541995:28542062:-	0.61	0.67	0.77	0.6	0.58	0.57	0.683333	0.583333	0.77	0.6	0.61	0.57	down
ATF2	chr2:175666035:175666241:-@chr2:175665517:175665590:-@chr2:175653237:175653739:-	0.11	0.11	0.22	0.27	0.25	0.31	0.146667	0.276667	0.22	0.31	0.11	0.25	up
ATP2C2	chr16:83050227:83050295:+@chr16:83050377:83050493:+	0.44	0.27	0.26	0.16	0.25	0.21	0.323333	0.206667	0.44	0.25	0.26	0.16	down
AURKB	chr17:8051410:8051219|8050783:-@chr17:8050534:8050682:-	0.5	0.48	0.48	0.62	0.53	0.77	0.486667	0.64	0.5	0.77	0.48	0.53	up
BCS1L	chr2:219234373:219234512|219234487:+@chr2:219234726:219234920:+	0.92	0.85	0.95	0.72	0.81	0.8	0.906667	0.776667	0.95	0.81	0.85	0.72	down
BCS1L	chr2:219232623:219232710:+@chr2:219233004:219233133:+@chr2:219233274:219233388:+@chr2:219233906:219234487:+	0.52	0.46	0.44	0.55	0.53	0.65	0.473333	0.576667	0.52	0.65	0.44	0.53	up
BDP1	chr5:70893857:70894103:+@chr5:70894358:70894478:+@chr5:70896337:70899408:+	0.43	0.45	0.45	0.27	0.37	0.34	0.443333	0.326667	0.45	0.37	0.43	0.27	down
BHLHB9	chrX:101862541:101862611:+@chrX:101889401:101889495:+@chrX:101890283:101895129:+	0.68	0.75	0.78	0.64	0.5	0.67	0.736667	0.603333	0.78	0.67	0.68	0.5	down
BHLHB9	chrX:101862541:101862611:+@chrX:101889417:101889495:+@chrX:101890283:101895129:+	0.76	0.71	0.64	0.5	0.46	0.6	0.703333	0.52	0.76	0.6	0.64	0.46	down
BRD9	chr5:940476:940586:-@chr5:939819|939882:939707:-	0.5	0.56	0.4	0.8	0.69	0.68	0.486667	0.723333	0.56	0.8	0.4	0.68	up
BRD9	chr5:922360:922519:-@chr5:921722:922234:-@chr5:918529:918696:-	0.3	0.4	0.36	0.2	0.22	0.25	0.353333	0.223333	0.4	0.25	0.3	0.2	down
BRD9	chr5:922360:922519:-@chr5:921919|922234:921722:-	0.56	0.47	0.43	0.58	0.6	0.6	0.486667	0.593333	0.56	0.6	0.43	0.58	up
BRD9	chr5:922360:922519:-@chr5:921722:921919:-@chr5:918529:918696:-	0.31	0.45	0.42	0.23	0.22	0.24	0.393333	0.23	0.45	0.24	0.31	0.22	down
C14orf37	chr14:57834426:57834610:-@chr14:57830237:57832282:-@chr14:57829785:57830015:-@chr14:57828106:57828178:-	0.6	0.65	0.61	0.46	0.57	0.49	0.62	0.506667	0.65	0.57	0.6	0.46	down
C19orf48	chr19:55999641:56000043:-@chr19:55998622:55998943:-@chr19:55997523:55997683:-	0.71	0.75	0.67	0.89	0.82	0.79	0.71	0.833333	0.75	0.89	0.67	0.79	up
C21orf2	chr21:44576154:44576325:-@chr21:44574774:44575227:-	0.62	0.54	0.61	0.47	0.52	0.34	0.59	0.443333	0.62	0.52	0.54	0.34	down
C2orf42	chr2:70308371:70308475:-@chr2:70305964:70306029:-@chr2:70305057:70305265:-	0.23	0.27	0.23	0.38	0.29	0.44	0.243333	0.37	0.27	0.44	0.23	0.29	up
C5orf45	chr5:179212984:179213043:-@chr5:179210849:179211030:-@chr5:179207062:179207672:-	0.31	0.22	0.27	0.42	0.49	0.41	0.266667	0.44	0.31	0.49	0.22	0.41	up
CALHM2	chr10:105201903:105202152:-@chr10:105200948|105201032:105200830:-	0.7	0.65	0.61	0.82	0.85	0.83	0.653333	0.833333	0.7	0.85	0.61	0.82	up
CCDC50	chr3:192570402:192570519:+@chr3:192575545:192576072:+@chr3:192580642:192580757:+	0.44	0.53	0.66	0.07	0.06	0.1	0.543333	0.0766667	0.66	0.1	0.44	0.06	down
CD44	chr11:35167958:35168095:+@chr11:35189369:35189572:+@chr11:35192975:35193037:+	0.9	0.86	0.87	0.59	0.65	0.69	0.876667	0.643333	0.9	0.69	0.86	0.59	down
CD44	chr11:35167785:35168188:+@chr11:35176244:35176369:+@chr11:35179205:35179318:+	0.88	0.88	0.86	0.59	0.25	0.18	0.873333	0.34	0.88	0.59	0.86	0.18	down
CD44	chr11:35167785:35168188:+@chr11:35188088:35188177:+@chr11:35189369:35190301:+	0.98	0.98	0.96	0.92	0.78	0.83	0.973333	0.843333	0.98	0.92	0.96	0.78	down
CD44	chr11:35179205:35179318:+@chr11:35179791:35179910:+@chr11:35182635:35182782:+	0.95	0.93	0.93	0.73	0.76	0.6	0.936667	0.696667	0.95	0.76	0.93	0.6	down
CD44	chr11:35167785:35168188:+@chr11:35182635:35182763:+@chr11:35184235:35184366:+	0.82	0.94	0.95	0.58	0.53	0.51	0.903333	0.54	0.95	0.58	0.82	0.51	down
CD44	chr11:35167785:35168188:+@chr11:35176244:35176369:+@chr11:35188088:35188177:+@chr11:35192975:35193037:+	0.93	0.93	0.92	0.85	0.57	0.45	0.926667	0.623333	0.93	0.85	0.92	0.45	down
CD44	chr11:35167785:35168188:+@chr11:35184235:35184366:+@chr11:35186228:35186329:+	0.22	0.24	0.22	0.07	0.05	0.08	0.226667	0.0666667	0.24	0.08	0.22	0.05	down
CD44	chr11:35179205:35179318:+@chr11:35179794:35179910:+@chr11:35182635:35182782:+	0.94	0.91	0.94	0.74	0.76	0.62	0.93	0.706667	0.94	0.76	0.91	0.62	down
CD44	chr11:35167785:35168188:+@chr11:35176271:35176369:+@chr11:35179205:35179318:+	0.44	0.49	0.61	0.12	0.04	0.05	0.513333	0.07	0.61	0.12	0.44	0.04	down
CD44	chr11:35182635:35182763:+@chr11:35184238:35184366:+@chr11:35186228:35186329:+	0.91	0.9	0.92	0.78	0.66	0.67	0.91	0.703333	0.92	0.78	0.9	0.66	down
CD44	chr11:35167785:35168188:+@chr11:35176244:35176369:+@chr11:35182635:35182763:+@chr11:35186228:35186329:+	0.18	0.22	0.25	0.4	0.45	0.3	0.216667	0.383333	0.25	0.45	0.18	0.3	up
CD44	chr11:35167785:35168188:+@chr11:35174869:35174997:+@chr11:35176244:35176369:+	0.21	0.24	0.24	0.08	0.1	0.15	0.23	0.11	0.24	0.15	0.21	0.08	down
CD44	chr11:35167785:35168188:+@chr11:35176244|35176271:35176369:+	0.96	0.97	0.93	0.88	0.69	0.44	0.953333	0.67	0.97	0.88	0.93	0.44	down
CD47	chr3:109253476:109255521:-@chr3:109252115:109252139:-@chr3:109244629:109248829:-	0.47	0.5	0.43	0.2	0.15	0.18	0.466667	0.176667	0.5	0.2	0.43	0.15	down
CDC42SE1	chr1:149295886:149295756|149295751:-@chr1:149294116:149295093:-	0.69	0.63	0.65	0.48	0.5	0.41	0.656667	0.463333	0.69	0.5	0.63	0.41	down
CDK5RAP1	chr20:31452895:31453374:-@chr20:31445499:31445533:-@chr20:31443406:31443709:-	0.46	0.53	0.34	0.63	0.72	0.76	0.443333	0.703333	0.53	0.76	0.34	0.63	up
CEP57L1	chr6:109586921:109587049|109586998:+@chr6:109587165:109587358:+	0.31	0.46	0.25	0.6	0.52	0.74	0.34	0.62	0.46	0.74	0.25	0.52	up
CFAP206	chr6:88267563:88267747:+@chr6:88274857:88274903:+@chr6:88275478:88275612:+	0.14	0.12	0.17	0.44	0.39	0.29	0.143333	0.373333	0.17	0.44	0.12	0.29	up
CLIP1	chr12:121473021:121473128:-@chr12:121467827:121467963:-@chr12:121450632:121450743:-@chr12:121430868:121431058:-	0.7	0.78	0.7	0.6	0.61	0.49	0.726667	0.566667	0.78	0.61	0.7	0.49	down
CLSTN1	chr1:9723739:9723905:-@chr1:9720143:9720199:-@chr1:9718530:9718687:-	0.26	0.22	0.29	0.57	0.61	0.61	0.256667	0.596667	0.29	0.61	0.22	0.57	up
CNOT2	chr12:68990942:68991064:+@chr12:68999345:68999411:+@chr12:69012814:69012893:+@chr12:69015485:69015841:+	0.44	0.51	0.49	0.39	0.35	0.38	0.48	0.373333	0.51	0.39	0.44	0.35	down
CSNK1E	chr22:37024737:37025155:-@chr22:37021339:37021399:-@chr22:37017891:37020486:-	0.48	0.5	0.56	0.31	0.23	0.3	0.513333	0.28	0.56	0.31	0.48	0.23	down
CTNND1	chr11:57285810:57286167:+@chr11:57315433|57315540:57315721:+	0.29	0.24	0.33	0.7	0.84	0.86	0.286667	0.8	0.33	0.86	0.24	0.7	up
CTNND1	chr11:57285810:57286094:+@chr11:57313085:57313203:+@chr11:57315433:57315721:+	0.12	0.17	0.23	0.62	0.68	0.7	0.173333	0.666667	0.23	0.7	0.12	0.62	up
CTNND1	chr11:57285810:57286094:+@chr11:57315433:57315721:+@chr11:57318058:57318129:+	0.06	0.05	0.05	0.18	0.16	0.19	0.0533333	0.176667	0.06	0.19	0.05	0.16	up
CTNND1	chr11:57339439:57339548:+@chr11:57339963:57340049:+@chr11:57340345:57343233:+	0.2	0.19	0.2	0.09	0.07	0.09	0.196667	0.0833333	0.2	0.09	0.19	0.07	down
CYB5RL	chr1:54425913:54426143:-@chr1:54422526|54424547:54422422:-	0.35	0.55	0.35	0.71	0.64	0.73	0.416667	0.693333	0.55	0.73	0.35	0.64	up
DAG1	chr3:49482569:49482870:+@chr3:49489286:49489342:+@chr3:49499691:49499852:+	0.29	0.23	0.26	0.55	0.4	0.35	0.26	0.433333	0.29	0.55	0.23	0.35	up
DALRD3	chr3:49028777:49028595|49028591:-@chr3:49028410:49028517:-	0.5	0.43	0.5	0.52	0.58	0.72	0.476667	0.606667	0.5	0.72	0.43	0.52	up
DBNL	chr7:44050764:44050944:+@chr7:44058991:44059075:+@chr7:44062881:44063027:+	0.12	0.13	0.15	0.22	0.29	0.3	0.133333	0.27	0.15	0.3	0.12	0.22	up
DBNL	chr7:44050764:44050944:+@chr7:44057954:44058070:+@chr7:44062881:44063027:+	0.18	0.2	0.1	0.27	0.26	0.31	0.16	0.28	0.2	0.31	0.1	0.26	up
DCUN1D2	chr13:113192983:113193269:-@chr13:113191406:113191489:-@chr13:113186156:113186512:-	0.24	0.19	0.33	0.08	0.17	0.14	0.253333	0.13	0.33	0.17	0.19	0.08	down
DDIT3	chr12:56197756:56200612:-@chr12:56197569|56197592:56197319:-	0.93	0.84	0.81	0.76	0.79	0.52	0.86	0.69	0.93	0.79	0.81	0.52	down
DEPDC1	chr1:68722221:68722361:-@chr1:68720912:68721168:-@chr1:68719711:68719883:-	0.59	0.49	0.49	0.36	0.4	0.41	0.523333	0.39	0.59	0.41	0.49	0.36	down
DEPDC1	chr1:68722221:68722361:-@chr1:68720317:68721168:-@chr1:68719711:68719883:-	0.8	0.74	0.7	0.64	0.62	0.64	0.746667	0.633333	0.8	0.64	0.7	0.62	down
DERL2	chr17:5325340:5325433:-@chr17:5325145:5325186:-	0.8	0.7	0.71	0.67	0.42	0.63	0.736667	0.573333	0.8	0.67	0.7	0.42	down
DERL2	chr17:5325145:5325433:-@chr17:5324431:5324503:-@chr17:5324098:5324188:-	0.38	0.25	0.23	0.88	0.8	0.86	0.286667	0.846667	0.38	0.88	0.23	0.8	up
DERL2	chr17:5325145:5325433:-@chr17:5324431:5324587:-@chr17:5324098:5324188:-	0.77	0.75	0.59	0.97	0.97	0.97	0.703333	0.97	0.77	0.97	0.59	0.97	up
DHRS1	chr14:23830602:23830671:-@chr14:23830185:23830265:-	0.42	0.41	0.65	0.19	0.29	0.33	0.493333	0.27	0.65	0.33	0.41	0.19	down
DIP2A	chr21:46742923:46743174:+@chr21:46748702:46748830:+@chr21:46753598:46753717:+	0.8	0.8	0.88	0.72	0.74	0.71	0.826667	0.723333	0.88	0.74	0.8	0.71	down
DLEU2	chr13:49499543:49499500|49499344:-@chr13:49469211:49469556:-	0.4	0.37	0.36	0.68	0.41	0.84	0.376667	0.643333	0.4	0.84	0.36	0.41	up
DLEU2	chr13:49540234:49540300:-@chr13:49516788:49516905:-@chr13:49498430:49499543:-	0.19	0.31	0.29	0.33	0.41	0.48	0.263333	0.406667	0.31	0.48	0.19	0.33	up
DLEU2	chr13:49516788:49516905:-@chr13:49501415:49501629:-@chr13:49498430:49499543:-	0.77	0.77	0.76	0.64	0.63	0.5	0.766667	0.59	0.77	0.64	0.76	0.5	down
DNAJB12	chr10:73765544:73765695:-@chr10:73764269:73764381:-	0.35	0.38	0.5	0.23	0.25	0.24	0.41	0.24	0.5	0.25	0.35	0.23	down
DNAJB12	chr10:73765695:73765544|73765367:-@chr10:73762594:73764381:-	0.31	0.38	0.29	0.26	0.22	0.15	0.326667	0.21	0.38	0.26	0.29	0.15	down
DNMT3B	chr20:30853852:30853937:+@chr20:30856805:30856874:+@chr20:30857676:30857794:+	0.85	0.81	0.77	0.64	0.45	0.72	0.81	0.603333	0.85	0.72	0.77	0.45	down
DNMT3B	chr20:30832820:30832881:+@chr20:30836225:30836326:+@chr20:30838697:30838918:+	0.27	0.17	0.26	0.46	0.47	0.52	0.233333	0.483333	0.27	0.52	0.17	0.46	up
DNMT3B	chr20:30853852:30853937:+@chr20:30857676:30857794:+@chr20:30859229:30860826:+	0.9	0.75	0.55	0.34	0.38	0.4	0.733333	0.373333	0.9	0.4	0.55	0.34	down
DPAGT1	chr11:118477415:118478334:-@chr11:118476938:118476967:-@chr11:118476550:118476763:-	0.72	0.81	0.87	0.57	0.47	0.68	0.8	0.573333	0.87	0.68	0.72	0.47	down
DPP7	chr9:139128736:139128849:-@chr9:139128516:139128651:-	0.25	0.28	0.17	0.32	0.4	0.39	0.233333	0.37	0.28	0.4	0.17	0.32	up
DUSP18	chr22:29393449:29393873:-@chr22:29392794:29392925:-@chr22:29387450:29390067:-	0.16	0.17	0.11	0.32	0.22	0.27	0.146667	0.27	0.17	0.32	0.11	0.22	up
EDRF1	chr10:127404241:127404397:+@chr10:127407562:127407663:+@chr10:127407917:127408038:+	0.51	0.58	0.61	0.32	0.27	0.33	0.566667	0.306667	0.61	0.33	0.51	0.27	down
EIF1AD	chr11:65526087:65526212:-@chr11:65524528|65524552:65524350:-	0.52	0.4	0.47	0.34	0.33	0.3	0.463333	0.323333	0.52	0.34	0.4	0.3	down
EIF4A2	chr3:187983071:187984122:+@chr3:187984915|187984917:187984960:+	0.32	0.35	0.54	0.84	0.56	0.65	0.403333	0.683333	0.54	0.84	0.32	0.56	up
ELAC2	chr17:12861113:12861900:-@chr17:12860967|12860974:12860904:-	0.81	0.88	0.81	0.8	0.6	0.71	0.833333	0.703333	0.88	0.8	0.81	0.6	down
ELMOD3	chr2:85436189:85436530|85436232:+@chr2:85437601:85438376:+	0.77	0.72	0.76	0.62	0.61	0.69	0.75	0.64	0.77	0.69	0.72	0.61	down
EP400	chr12:131030192:131030291:+@chr12:131031987:131032094:+@chr12:131032591:131033467:+	0.49	0.47	0.35	0.6	0.6	0.76	0.436667	0.653333	0.49	0.76	0.35	0.6	up
EPB41	chr1:29264056:29264257:+@chr1:29295254:29295703:+@chr1:29296906:29297034:+	0.7	0.73	0.66	0.19	0.22	0.15	0.696667	0.186667	0.73	0.22	0.66	0.15	down
EPB41L1	chr20:34249195:34249377:+@chr20:34260824:34261234:+@chr20:34263608:34263712:+	0.32	0.39	0.29	0.43	0.53	0.46	0.333333	0.473333	0.39	0.53	0.29	0.43	up
EPN2	chr17:19155958:19156050:+@chr17:19157011|19157029:19157185:+	0.73	0.68	0.78	0.59	0.62	0.44	0.73	0.55	0.78	0.62	0.68	0.44	down
EPN2	chr17:19081247:19081437:+@chr17:19117957:19118224:+@chr17:19123768:19123886:+@chr17:19125861:19125983:+	0.84	0.72	0.86	0.62	0.68	0.65	0.806667	0.65	0.86	0.68	0.72	0.62	down
ESRP1	chr8:95755712:95755910|95755898:+@chr8:95759607:95759775:+	0.5	0.53	0.53	0.66	0.8	0.68	0.52	0.713333	0.53	0.8	0.5	0.66	up
FAM122B	chrX:133743517:133743613:-@chrX:133733050|133733979:133731270:-	0.93	0.92	0.85	0.72	0.8	0.81	0.9	0.776667	0.93	0.81	0.85	0.72	down
FAM122B	chrX:133743517:133743613:-@chrX:133733139:133733979:-@chrX:133731262:133733050:-	0.83	0.87	0.76	0.62	0.71	0.71	0.82	0.68	0.87	0.71	0.76	0.62	down
FAM193B	chr5:176892050:176892248:-@chr5:176891560:176891807:-@chr5:176890889:176891128:-	0.36	0.35	0.41	0.24	0.3	0.19	0.373333	0.243333	0.41	0.3	0.35	0.19	down
FAM193B	chr5:176892050:176892248:-@chr5:176891763:176891807:-@chr5:176890889:176891128:-	0.18	0.13	0.33	0.08	0.07	0.1	0.213333	0.0833333	0.33	0.1	0.13	0.07	down
FAM63B	chr15:56889721:56889879|56889777:+@chr15:56901208:56901314:+	0.86	0.85	0.83	0.77	0.74	0.72	0.846667	0.743333	0.86	0.77	0.83	0.72	down
FANCA	chr16:88355858:88355931:-@chr16:88352486:88352610:-@chr16:88346047:88346131:-	0.76	0.73	0.76	0.21	0.43	0.65	0.75	0.43	0.76	0.65	0.73	0.21	down
FANCA	chr16:88355858:88355931:-@chr16:88352486:88352614:-@chr16:88346047:88346131:-	0.88	0.85	0.76	0.45	0.59	0.69	0.83	0.576667	0.88	0.69	0.76	0.45	down
FANCA	chr16:88393075:88393141:-@chr16:88392860:88392988:-	0.09	0.17	0.16	0.2	0.18	0.36	0.14	0.246667	0.17	0.36	0.09	0.18	up
FGFR2	chr10:123269483:123269715:-@chr10:123268186:123268333:-@chr10:123266823:123266967:-	0.84	0.86	0.69	0.51	0.55	0.35	0.796667	0.47	0.86	0.55	0.69	0.35	down
FGFR2	chr10:123268186:123268333:-@chr10:123266823:123266967:-@chr10:123264621:123264823:-	0.07	0.05	0.07	0.45	0.35	0.42	0.0633333	0.406667	0.07	0.45	0.05	0.35	up
FLNA	chrX:153238996:153239185:-@chrX:153238813:153238836:-@chrX:153236387:153236634:-	0.5	0.49	0.48	0.63	0.63	0.63	0.49	0.63	0.5	0.63	0.48	0.63	up
FLNB	chr3:58099049:58099296:+@chr3:58102625:58102696:+@chr3:58103417:58103519:+	0.97	0.93	0.96	0.71	0.74	0.73	0.953333	0.726667	0.97	0.74	0.93	0.71	down
FLNB	chr3:58099049:58099296:+@chr3:58102625:58102663:+@chr3:58103417:58103519:+	0.94	0.87	0.92	0.51	0.54	0.48	0.91	0.51	0.94	0.54	0.87	0.48	down
FN1	chr2:215967496:215967687:-@chr2:215965899:215966171:-@chr2:215964600:215964782:-	0.29	0.27	0.28	0.52	0.51	0.46	0.28	0.496667	0.29	0.52	0.27	0.46	up
GALT	chr9:34636659:34637255:+@chr9:34637472|34637538:34637564:+	0.18	0.21	0.31	0.43	0.34	0.36	0.233333	0.376667	0.31	0.43	0.18	0.34	up
GGA3	chr17:70754185:70754260:-@chr17:70752295:70752393:-@chr17:70751123:70751246:-	0.67	0.84	0.8	0.62	0.63	0.64	0.77	0.63	0.84	0.64	0.67	0.62	down
GLYCTK	chr3:52300016:52300167:+@chr3:52301316:52301625:+@chr3:52302102:52302248:+	0.74	0.73	0.65	0.82	0.84	0.82	0.706667	0.826667	0.74	0.84	0.65	0.82	up
GLYCTK	chr3:52300016:52300167:+@chr3:52301316|52302102:52302248:+	0.77	0.71	0.69	0.88	0.87	0.79	0.723333	0.846667	0.77	0.88	0.69	0.79	up
GNPDA1	chr5:141364735:141364865:-@chr5:141362963|141363011:141362837:-	0.75	0.76	0.71	0.86	0.92	0.77	0.74	0.85	0.76	0.92	0.71	0.77	up
GOLGA2P5	chr12:99075437:99075648:-@chr12:99075074:99075354:-	0.09	0.15	0.12	0.23	0.21	0.23	0.12	0.223333	0.15	0.23	0.09	0.21	up
GRK2	chr11:66807175:66807275:+@chr11:66807754|66807901:66807996:+	0.89	0.89	0.84	0.76	0.76	0.63	0.873333	0.716667	0.89	0.76	0.84	0.63	down
GSE1	chr16:84204323:84204505:+@chr16:84225021:84225239:+@chr16:84239659:84239858:+	0.5	0.44	0.37	0.6	0.63	0.65	0.436667	0.626667	0.5	0.65	0.37	0.6	up
GSN	chr9:123083569:123083661:+@chr9:123083974:123084052:+@chr9:123084538:123084649:+@chr9:123104062:123104266:+	0.16	0.06	0.09	0.17	0.18	0.44	0.103333	0.263333	0.16	0.44	0.06	0.17	up
HDAC3	chr5:140988310:140988390:-@chr5:140987865:140987963:-	0.68	0.64	0.64	0.3	0.29	0.58	0.653333	0.39	0.68	0.58	0.64	0.29	down
HDAC8	chrX:71631731:71631843:-@chrX:71627504:71627575:-@chrX:71625508:71625616:-	0.72	0.78	0.85	0.67	0.69	0.43	0.783333	0.596667	0.85	0.69	0.72	0.43	down
HMBS	chr11:118464555:118465051|118464768:+@chr11:118465137:118465196:+	0.54	0.62	0.57	0.69	0.79	0.68	0.576667	0.72	0.62	0.79	0.54	0.68	up
HPS1	chr10:100183730:100183838:-@chr10:100180878:100181038:-@chr10:100180249:100180417:-	0.9	0.83	0.85	0.76	0.75	0.71	0.86	0.74	0.9	0.76	0.83	0.71	down
HPS1	chr10:100183838:100183730|100183687:-@chr10:100180878:100181038:-	0.32	0.41	0.37	0.55	0.43	0.72	0.366667	0.566667	0.41	0.72	0.32	0.43	up
HTRA2	chr2:74611974:74612006:+@chr2:74612202:74612337:+	0.7	0.71	0.66	0.45	0.54	0.51	0.69	0.5	0.71	0.54	0.66	0.45	down
INF2	chr14:104251585:104252238:+@chr14:104252666:104252722:+@chr14:104256177:104256994:+	0.93	0.93	0.94	0.67	0.73	0.68	0.933333	0.693333	0.94	0.73	0.93	0.67	down
ITGA6	chr2:173070949:173071074:+@chr2:173074746:173074875:+@chr2:173077065:173079433:+	0.74	0.73	0.68	0.35	0.37	0.33	0.716667	0.35	0.74	0.37	0.68	0.33	down
KDM4C	chr9:7093685:7093870:+@chr9:7095402:7095500:+@chr9:7118066:7118236:+	0.15	0.2	0.17	0.32	0.23	0.29	0.173333	0.28	0.2	0.32	0.15	0.23	up
KIAA0753	chr17:6484681:6484971:-@chr17:6479445:6479678:-@chr17:6478785:6479215:-	0.33	0.3	0.25	0.17	0.07	0.16	0.293333	0.133333	0.33	0.17	0.25	0.07	down
KIAA0895L	chr16:65774666:65775444:-@chr16:65773010:65773101:-@chr16:65771445:65772070:-	0.34	0.28	0.24	0.37	0.5	0.36	0.286667	0.41	0.34	0.5	0.24	0.36	up
KIAA0895L	chr16:65774666:65775444:-@chr16:65772962:65773101:-@chr16:65771445:65772070:-	0.47	0.39	0.47	0.57	0.61	0.53	0.443333	0.57	0.47	0.61	0.39	0.53	up
KIAA0895L	chr16:65774666:65775444:-@chr16:65772994:65773101:-@chr16:65771445:65772070:-	0.3	0.26	0.27	0.39	0.44	0.33	0.276667	0.386667	0.3	0.44	0.26	0.33	up
KIF13A	chr6:17880118:17880269:-@chr6:17879324:17879428:-@chr6:17871903:17873156:-	0.88	0.82	0.86	0.51	0.45	0.44	0.853333	0.466667	0.88	0.51	0.82	0.44	down
KIF21A	chr12:37999975:38000082:-@chr12:37996001:37996039:-@chr12:37991484:37991622:-	0.09	0.11	0.17	0.57	0.27	0.21	0.123333	0.35	0.17	0.57	0.09	0.21	up
KIF2A	chr5:61637746:61638120:+@chr5:61639893:61640095:+@chr5:61653167:61653305:+@chr5:61678714:61678808:+	0.3	0.2	0.41	0.64	0.51	0.44	0.303333	0.53	0.41	0.64	0.2	0.44	up
KLK8	chr19:56196166:56196243:-@chr19:56195492:56195786:-@chr19:56195064:56195326:-	0.61	0.62	0.72	0.4	0.42	0.41	0.65	0.41	0.72	0.42	0.61	0.4	down
KLK9	chr19:56196166:56196243:-@chr19:56195492:56195786:-@chr19:56195064:56195326:-	0.61	0.62	0.72	0.4	0.42	0.41	0.65	0.41	0.72	0.42	0.61	0.4	down
LINC01089	chr12:120724920:120726042:-@chr12:120724092|120724097:120723996:-	0.87	0.87	0.83	0.73	0.61	0.55	0.856667	0.63	0.87	0.73	0.83	0.55	down
LINC01569	chr16:4243649:4243791:-@chr16:4241324:4242036:-@chr16:4238254:4238430:-@chr16:4235827:4237063:-	0.86	0.83	0.69	0.6	0.66	0.65	0.793333	0.636667	0.86	0.66	0.69	0.6	down
LMO7	chr13:75276315:75276678:+@chr13:75281291:75281320:+@chr13:75289298:75289415:+	0.81	0.8	0.76	0.91	0.91	0.9	0.79	0.906667	0.81	0.91	0.76	0.9	up
LMO7	chr13:75306363:75306524:+@chr13:75307289|75307370:75307476:+	0.49	0.54	0.56	0.34	0.33	0.29	0.53	0.32	0.56	0.34	0.49	0.29	down
LOC101928143	chr14:72818820:72818966:-@chr14:72815742:72815885:-@chr14:72811568:72813754:-	0.63	0.64	0.62	0.51	0.48	0.48	0.63	0.49	0.64	0.51	0.62	0.48	down
LOC102724229	chr7:102015285:102015150|102014480:-@chr7:102011740:102011860:-	0.78	0.53	0.62	0.5	0.36	0.42	0.643333	0.426667	0.78	0.5	0.53	0.36	down
LOC105369243	chr16:29378695:29378807:+@chr16:29380173|29380204:29380355:+	0.07	0.08	0.1	0.3	0.17	0.13	0.0833333	0.2	0.1	0.3	0.07	0.13	up
LOC400927-CSNK1E	chr22:37024737:37025155:-@chr22:37021339:37021399:-@chr22:37017891:37020486:-	0.48	0.5	0.56	0.31	0.23	0.3	0.513333	0.28	0.56	0.31	0.48	0.23	down
LPAR2	chr19:19600237:19600739:-@chr19:19599901:19599976:-@chr19:19598853:19599313:-	0.54	0.64	0.57	0.45	0.36	0.46	0.583333	0.423333	0.64	0.46	0.54	0.36	down
LRP8	chr1:53513891:53514013:-@chr1:53510864:53510902:-@chr1:53509487:53509606:-	0.39	0.41	0.49	0.57	0.62	0.72	0.43	0.636667	0.49	0.72	0.39	0.57	up
LRRC14	chr8:145714563:145715007:+@chr8:145715807|145715893:145716246:+	0.49	0.44	0.31	0.67	0.74	0.68	0.413333	0.696667	0.49	0.74	0.31	0.67	up
LSR	chr19:40441688:40441807:+@chr19:40445289:40445435:+@chr19:40449102:40449275:+	0.24	0.24	0.24	0.53	0.52	0.55	0.24	0.533333	0.24	0.55	0.24	0.52	up
LSR	chr19:40441688:40441807:+@chr19:40444668:40444724:+@chr19:40445239:40445435:+@chr19:40449102:40449275:+	0.61	0.64	0.56	0.91	0.85	0.9	0.603333	0.886667	0.64	0.91	0.56	0.85	up
LSR	chr19:40441688:40441807:+@chr19:40445289:40445439:+@chr19:40449102:40449275:+	0.13	0.13	0.13	0.32	0.32	0.35	0.13	0.33	0.13	0.35	0.13	0.32	up
LSR	chr19:40441688:40441807:+@chr19:40445239:40445435:+@chr19:40449102:40449275:+	0.12	0.11	0.11	0.29	0.31	0.32	0.113333	0.306667	0.12	0.32	0.11	0.29	up
LZTR1	chr22:19678393:19678558:+@chr22:19678847|19678963:19679016:+	0.87	0.85	0.78	0.69	0.73	0.65	0.833333	0.69	0.87	0.73	0.78	0.65	down
MATR3	chr5:138678263:138678324:+@chr5:138679664:138679776:+	0.35	0.19	0.3	0.81	0.43	0.42	0.28	0.553333	0.35	0.81	0.19	0.42	up
MBNL1	chr3:153645761:153646018:+@chr3:153648099:153648252:+@chr3:153656021:153656056:+	0.5	0.35	0.42	0.75	0.61	0.65	0.423333	0.67	0.5	0.75	0.35	0.61	up
MBNL1	chr3:153645761:153646018:+@chr3:153647183:153647236:+@chr3:153648099:153648252:+	0.62	0.69	0.63	0.51	0.46	0.45	0.646667	0.473333	0.69	0.51	0.62	0.45	down
MBNL2	chr13:96807737:96807890:+@chr13:96816714:96816808:+@chr13:96841577:96844377:+	0.85	0.79	0.8	0.7	0.61	0.74	0.813333	0.683333	0.85	0.74	0.79	0.61	down
METTL5	chr2:170389245:170389670:-@chr2:170385848:170386029:-@chr2:170376424:170377262:-	0.63	0.64	0.64	0.5	0.56	0.53	0.636667	0.53	0.64	0.56	0.63	0.5	down
METTL8	chr2:171903940:171904310:-@chr2:171896560:171896623:-@chr2:171895315:171895454:-	0.73	0.58	0.69	0.43	0.46	0.31	0.666667	0.4	0.73	0.46	0.58	0.31	down
METTL8	chr2:171896623:171896560|171896521:-@chr2:171895315:171895454:-	0.23	0.18	0.14	0.36	0.38	0.57	0.183333	0.436667	0.23	0.57	0.14	0.36	up
MFF	chr2:227913252:227913340:+@chr2:227925474:227925533:+@chr2:227928637:227928999:+	0.61	0.41	0.54	0.77	0.67	0.69	0.52	0.71	0.61	0.77	0.41	0.67	up
MFSD10	chr4:2904125:2904734:-@chr4:2903876:2903934:-@chr4:2902900:2903678:-	0.81	0.83	0.83	0.94	0.9	0.95	0.823333	0.93	0.83	0.95	0.81	0.9	up
MICAL3	chr22:16694620:16694873:-@chr22:16689220:16689282:-@chr22:16685705:16685826:-	0.06	0.16	0.13	0.19	0.65	0.43	0.116667	0.423333	0.16	0.65	0.06	0.19	up
MIR1204	chr8:128875942:128876162:+@chr8:128877322:128877436:+@chr8:128936583:128936747:+	0.29	0.32	0.25	0.36	0.54	0.43	0.286667	0.443333	0.32	0.54	0.25	0.36	up
MIR1248	chr3:187983071:187984122:+@chr3:187984915|187984917:187984960:+	0.32	0.35	0.54	0.84	0.56	0.65	0.403333	0.683333	0.54	0.84	0.32	0.56	up
MIR15A	chr13:49540234:49540300:-@chr13:49516788:49516905:-@chr13:49498430:49499543:-	0.19	0.31	0.29	0.33	0.41	0.48	0.263333	0.406667	0.31	0.48	0.19	0.33	up
MIR15A	chr13:49499543:49499500|49499344:-@chr13:49469211:49469556:-	0.4	0.37	0.36	0.68	0.41	0.84	0.376667	0.643333	0.4	0.84	0.36	0.41	up
MIR15A	chr13:49516788:49516905:-@chr13:49501415:49501629:-@chr13:49498430:49499543:-	0.77	0.77	0.76	0.64	0.63	0.5	0.766667	0.59	0.77	0.64	0.76	0.5	down
MIR16-1	chr13:49540234:49540300:-@chr13:49516788:49516905:-@chr13:49498430:49499543:-	0.19	0.31	0.29	0.33	0.41	0.48	0.263333	0.406667	0.31	0.48	0.19	0.33	up
MIR616	chr12:56197756:56200612:-@chr12:56197569|56197592:56197319:-	0.93	0.84	0.81	0.76	0.79	0.52	0.86	0.69	0.93	0.79	0.81	0.52	down
MIR6837	chr7:44050764:44050944:+@chr7:44058991:44059075:+@chr7:44062881:44063027:+	0.12	0.13	0.15	0.22	0.29	0.3	0.133333	0.27	0.15	0.3	0.12	0.22	up
MIR6837	chr7:44050764:44050944:+@chr7:44057954:44058070:+@chr7:44062881:44063027:+	0.18	0.2	0.1	0.27	0.26	0.31	0.16	0.28	0.2	0.31	0.1	0.26	up
MIR6838	chr7:44080522:44080654:-@chr7:44080255:44080357:-@chr7:44079907:44080149:-	0.62	0.65	0.69	0.43	0.42	0.54	0.653333	0.463333	0.69	0.54	0.62	0.42	down
MIR937	chr8:144962767:144963183:-@chr8:144961710:144961772:-@chr8:144961082:144961171:-	0.08	0.06	0.12	0.55	0.48	0.44	0.0866667	0.49	0.12	0.55	0.06	0.44	up
MLPH	chr2:238098983:238099187:+@chr2:238100711:238100898:+@chr2:238107946:238108029:+	0.37	0.32	0.46	0.7	0.8	0.75	0.383333	0.75	0.46	0.8	0.32	0.7	up
MLPH	chr2:238100711:238100898:+@chr2:238107946:238108029:+@chr2:238113730:238113915:+	0.11	0.11	0.11	0.54	0.47	0.47	0.11	0.493333	0.11	0.54	0.11	0.47	up
MLST8	chr16:2196360:2196411:+@chr16:2196481:2196661:+	0.56	0.4	0.5	0.29	0.17	0.31	0.486667	0.256667	0.56	0.31	0.4	0.17	down
MORF4L2	chrX:102826265:102826327:-@chrX:102820184|102820235:102820083:-	0.55	0.75	0.62	0.5	0.52	0.54	0.64	0.52	0.75	0.54	0.55	0.5	down
MORF4L2	chrX:102820184:102820085|102820079:-@chrX:102817078:102818635:-	0.41	0.46	0.44	0.53	0.61	0.52	0.436667	0.553333	0.46	0.61	0.41	0.52	up
MPDU1	chr17:7430734:7430880:+@chr17:7431203:7431313:+	0.1	0.08	0.06	0.32	0.28	0.2	0.08	0.266667	0.1	0.32	0.06	0.2	up
MPDU1	chr17:7430734:7430880|7430819:+@chr17:7431203:7431313:+	0.85	0.81	0.84	0.65	0.47	0.75	0.833333	0.623333	0.85	0.75	0.81	0.47	down
MRPL9	chr1:150001205:150001255:-@chr1:150000551:150000652:-@chr1:149999916:149999999:-	0.94	0.94	0.9	0.85	0.72	0.74	0.926667	0.77	0.94	0.85	0.9	0.72	down
MRPL9	chr1:150001205:150001255:-@chr1:150000547:150000652:-@chr1:149999916:149999999:-	0.81	0.73	0.68	0.62	0.28	0.42	0.74	0.44	0.81	0.62	0.68	0.28	down
MSLN	chr16:643747:643804:+@chr16:645030:645148:+	0.21	0.26	0.16	0.56	0.33	0.45	0.21	0.446667	0.26	0.56	0.16	0.33	up
MTFR1	chr8:66737254:66737513|66737473:+@chr8:66744662:66744807:+	0.63	0.62	0.48	0.47	0.28	0.45	0.576667	0.4	0.63	0.47	0.48	0.28	down
MTFR1L	chr1:26021608:26022206:+@chr1:26022316|26022424:26022517:+	0.82	0.83	0.86	0.64	0.71	0.71	0.836667	0.686667	0.86	0.71	0.82	0.64	down
MTFR1L	chr1:26021608:26022206:+@chr1:26022318|26022424:26022517:+	0.77	0.74	0.79	0.52	0.52	0.7	0.766667	0.58	0.79	0.7	0.74	0.52	down
MYD88	chr3:38153935:38155523:+@chr3:38156883:38157087:+@chr3:38157252:38157343:+	0.91	0.87	0.85	0.74	0.8	0.71	0.876667	0.75	0.91	0.8	0.85	0.71	down
MYO9A	chr15:70039296:70039491:-@chr15:70031172:70031291:-@chr15:70018158:70018322:-	0.38	0.52	0.35	0.56	0.74	0.53	0.416667	0.61	0.52	0.74	0.35	0.53	up
MYOF	chr10:95145889:95145971:-@chr10:95142664:95142702:-@chr10:95138777:95138901:-	0.35	0.41	0.47	0.83	0.85	0.85	0.41	0.843333	0.47	0.85	0.35	0.83	up
NAT9	chr17:70283356:70283985:-@chr17:70281727:70281789:-@chr17:70281600:70281673:-@chr17:70280330:70281419:-	0.56	0.48	0.61	0.77	0.63	0.68	0.55	0.693333	0.61	0.77	0.48	0.63	up
NDUFA3	chr19:59301930:59302097|59302089:+@chr19:59303559:59303845:+	0.22	0.29	0.24	0.47	0.56	0.39	0.25	0.473333	0.29	0.56	0.22	0.39	up
NEIL1	chr15:73426344:73426867:+@chr15:73427353:73427420:+@chr15:73428278:73429055:+	0.28	0.12	0.24	0.34	0.52	0.32	0.213333	0.393333	0.28	0.52	0.12	0.32	up
NF2	chr22:28407428:28407590:+@chr22:28409009:28409053:+@chr22:28420741:28424593:+	0.89	0.94	0.9	0.75	0.68	0.77	0.91	0.733333	0.94	0.77	0.89	0.68	down
NF2	chr22:28409009:28409053:+@chr22:28409690:28409904:+	0.3	0.51	0.37	0.66	0.77	0.65	0.393333	0.693333	0.51	0.77	0.3	0.65	up
NF2	chr22:28407428:28407590:+@chr22:28409009:28409068:+@chr22:28420741:28424593:+	0.54	0.66	0.5	0.36	0.3	0.39	0.566667	0.35	0.66	0.39	0.5	0.3	down
NF2	chr22:28329545:28330101:+@chr22:28365079:28365201:+@chr22:28368191:28368274:+	0.3	0.23	0.3	0.48	0.39	0.4	0.276667	0.423333	0.3	0.48	0.23	0.39	up
NFYA	chr6:41154746:41154881:+@chr6:41156528:41156614:+@chr6:41159763:41159909:+	0.1	0.14	0.1	0.34	0.31	0.36	0.113333	0.336667	0.14	0.36	0.1	0.31	up
NSUN5P1	chr7:72058321:72058436:-@chr7:72057788:72057962:-@chr7:72057367:72057577:-	0.47	0.71	0.55	0.79	0.78	0.78	0.576667	0.783333	0.71	0.79	0.47	0.78	up
NSUN5P1	chr7:74877542:74877679:+@chr7:74880003:74880146:+@chr7:74882099:74882237:+	0.3	0.35	0.36	0.41	0.61	0.4	0.336667	0.473333	0.36	0.61	0.3	0.4	up
NSUN5P1	chr7:74882806:74883194:+@chr7:74883317:74883405:+	0.9	0.95	0.91	0.73	0.81	0.89	0.92	0.81	0.95	0.89	0.9	0.73	down
NSUN5P2	chr7:72058321:72058436:-@chr7:72057788:72057962:-@chr7:72057367:72057577:-	0.47	0.71	0.55	0.79	0.78	0.78	0.576667	0.783333	0.71	0.79	0.47	0.78	up
NUMB	chr14:72818820:72818966:-@chr14:72815742:72815885:-@chr14:72811568:72813754:-	0.63	0.64	0.62	0.51	0.48	0.48	0.63	0.49	0.64	0.51	0.62	0.48	down
NUP88	chr17:5232846:5233004:-@chr17:5231964|5231996:5231823:-	0.64	0.24	0.24	0.13	0.13	0.08	0.373333	0.113333	0.64	0.13	0.24	0.08	down
NUP98	chr11:3731122:3731214:-@chr11:3722315:3722455:-@chr11:3712997:3713130:-	0.81	0.79	0.63	0.86	0.83	0.86	0.743333	0.85	0.81	0.86	0.63	0.83	up
OSBPL3	chr7:24869640:24869743:-@chr7:24869344:24869436:-@chr7:24867757:24867913:-	0.32	0.29	0.42	0.85	0.93	0.9	0.343333	0.893333	0.42	0.93	0.29	0.85	up
PABPC1L	chr20:42999607:43000246:+@chr20:43014698:43014759:+@chr20:43020392:43021211:+	0.27	0.28	0.24	0.11	0.15	0.23	0.263333	0.163333	0.28	0.23	0.24	0.11	down
PABPC1L	chr20:42998692:42998785:+@chr20:43000157:43000246:+@chr20:43020392:43021211:+	0.58	0.52	0.56	0.31	0.49	0.26	0.553333	0.353333	0.58	0.49	0.52	0.26	down
PCCB	chr3:137528335:137528787|137528442:+@chr3:137529166:137529264:+	0.86	0.82	0.79	0.75	0.62	0.62	0.823333	0.663333	0.86	0.75	0.79	0.62	down
PDHB	chr3:58394535:58394621:-@chr3:58392751|58394451:58392644:-	0.55	0.47	0.44	0.32	0.28	0.26	0.486667	0.286667	0.55	0.32	0.44	0.26	down
PDLIM7	chr5:176852012:176852042:-@chr5:176851414:176851532:-@chr5:176850617:176851027:-	0.8	0.93	0.87	0.74	0.57	0.77	0.866667	0.693333	0.93	0.77	0.8	0.57	down
PEX10	chr1:2329751:2330157:-@chr1:2328251|2328254:2328019:-	0.39	0.32	0.4	0.15	0.14	0.29	0.37	0.193333	0.4	0.29	0.32	0.14	down
PHYKPL	chr5:177582459:177582541:-@chr5:177582187|177582205:177581962:-	0.18	0.14	0.19	0.23	0.26	0.39	0.17	0.293333	0.19	0.39	0.14	0.23	up
PIGO	chr9:35082540:35082764:-@chr9:35081237:35081288:-	0.7	0.67	0.86	0.6	0.4	0.59	0.743333	0.53	0.86	0.6	0.67	0.4	down
PIGP	chr21:37366604:37367285:-@chr21:37366315:37366480:-@chr21:37363480:37363794:-	0.55	0.5	0.55	0.26	0.41	0.36	0.533333	0.343333	0.55	0.41	0.5	0.26	down
POLM	chr7:44080522:44080654:-@chr7:44080255:44080357:-@chr7:44079907:44080149:-	0.62	0.65	0.69	0.43	0.42	0.54	0.653333	0.463333	0.69	0.54	0.62	0.42	down
POLR2J2	chr7:101997388:101997477:-@chr7:101994636|101995737:101994550:-	0.24	0.28	0.23	0.47	0.42	0.36	0.25	0.416667	0.28	0.47	0.23	0.36	up
POLR2J2	chr7:102015285:102015150|102014480:-@chr7:102011740:102011860:-	0.78	0.53	0.62	0.5	0.36	0.42	0.643333	0.426667	0.78	0.5	0.53	0.36	down
POLR2J3	chr7:101997388:101997477:-@chr7:101994636|101995737:101994550:-	0.24	0.28	0.23	0.47	0.42	0.36	0.25	0.416667	0.28	0.47	0.23	0.36	up
POLR2J3	chr7:102015285:102015150|102014480:-@chr7:102011740:102011860:-	0.78	0.53	0.62	0.5	0.36	0.42	0.643333	0.426667	0.78	0.5	0.53	0.36	down
POMT1	chr9:133375111:133375270:+@chr9:133375468:133375623:+	0.82	0.75	0.82	0.74	0.59	0.6	0.796667	0.643333	0.82	0.74	0.75	0.59	down
PPM1K	chr4:89417319:89418818:-@chr4:89414602:89414661:-@chr4:89411176:89411365:-@chr4:89408917:89409082:-	0.29	0.21	0.24	0.52	0.39	0.49	0.246667	0.466667	0.29	0.52	0.21	0.39	up
PPP1R12A	chr12:78708378:78708394:-@chr12:78707509:78707591:-@chr12:78704688:78706694:-	0.11	0.11	0.16	0.26	0.39	0.27	0.126667	0.306667	0.16	0.39	0.11	0.26	up
PRICKLE4	chr6:41859178:41859321:+@chr6:41859450:41859954:+	0.87	0.89	0.87	0.81	0.63	0.76	0.876667	0.733333	0.89	0.81	0.87	0.63	down
PSMA3-AS1	chr14:57834426:57834610:-@chr14:57830237:57832282:-@chr14:57829785:57830015:-@chr14:57828106:57828178:-	0.6	0.65	0.61	0.46	0.57	0.49	0.62	0.506667	0.65	0.57	0.6	0.46	down
PTK6	chr20:61638882:61639306:-@chr20:61636772:61636856:-@chr20:61635623:61636112:-	0.55	0.56	0.61	0.43	0.52	0.47	0.573333	0.473333	0.61	0.52	0.55	0.43	down
PVT1	chr8:128875942:128876162:+@chr8:128877322:128877436:+@chr8:128936583:128936747:+	0.29	0.32	0.25	0.36	0.54	0.43	0.286667	0.443333	0.32	0.54	0.25	0.36	up
RAPGEF1	chr9:133487004:133487206:-@chr9:133469169:133469261:-@chr9:133467269:133467357:-	0.15	0.22	0.18	0.08	0.06	0.02	0.183333	0.0533333	0.22	0.08	0.15	0.02	down
RAPGEFL1	chr17:35587274:35588159:+@chr17:35591077:35591264:+@chr17:35591394:35591472:+	0.15	0.14	0.15	0.41	0.51	0.24	0.146667	0.386667	0.15	0.51	0.14	0.24	up
RASA4	chr7:102015285:102015150|102014480:-@chr7:102011740:102011860:-	0.78	0.53	0.62	0.5	0.36	0.42	0.643333	0.426667	0.78	0.5	0.53	0.36	down
RRNAD1	chr1:154969793:154969936:+@chr1:154970425:154970468:+@chr1:154972141:154972325:+	0.23	0.23	0.16	0.46	0.32	0.34	0.206667	0.373333	0.23	0.46	0.16	0.32	up
S100A4	chr1:151784853:151784985:-@chr1:151784570:151784618:-@chr1:151783754:151783909:-	0.04	0.04	0.04	0.15	0.16	0.14	0.04	0.15	0.04	0.16	0.04	0.14	up
S100A4	chr1:151784618:151784580|151784570:-@chr1:151783754:151783909:-	0.38	0.34	0.28	0.72	0.67	0.77	0.333333	0.72	0.38	0.77	0.28	0.67	up
SCRIB	chr8:144962767:144963183:-@chr8:144961710:144961772:-@chr8:144961082:144961171:-	0.08	0.06	0.12	0.55	0.48	0.44	0.0866667	0.49	0.12	0.55	0.06	0.44	up
SDR39U1	chr14:23981392:23981821:-@chr14:23981155:23981306:-@chr14:23979829:23980841:-	0.77	0.77	0.81	0.91	0.88	0.96	0.783333	0.916667	0.81	0.96	0.77	0.88	up
2021-09-06	chrX:118647309:118647499:-@chrX:118636704:118636777:-@chrX:118633715:118634733:-	0.15	0.12	0.13	0.41	0.25	0.57	0.133333	0.41	0.15	0.57	0.12	0.25	up
SIRT2	chr19:44075894:44077642:-@chr19:44074274:44074446:-@chr19:44073045:44073142:-@chr19:44071567:44072624:-	0.38	0.31	0.38	0.54	0.5	0.49	0.356667	0.51	0.38	0.54	0.31	0.49	up
SLC25A19	chr17:70797030:70797638:-@chr17:70796178:70796267:-@chr17:70794309:70794478:-	0.38	0.43	0.55	0.56	0.62	0.57	0.453333	0.583333	0.55	0.62	0.38	0.56	up
SLC29A2	chr11:65893579:65893416|65893107:-@chr11:65892584:65892718:-	0.35	0.33	0.4	0.67	0.42	0.43	0.36	0.506667	0.4	0.67	0.33	0.42	up
SLC29A3	chr10:72752513:72752817:+@chr10:72773972:72774054:+@chr10:72781325:72781551:+	0.66	0.76	0.76	0.83	0.84	0.82	0.726667	0.83	0.76	0.84	0.66	0.82	up
SLC35A1	chr6:88267563:88267747:+@chr6:88274857:88274903:+@chr6:88275478:88275612:+	0.14	0.12	0.17	0.44	0.39	0.29	0.143333	0.373333	0.17	0.44	0.12	0.29	up
SLC37A2	chr11:124460834:124461124:+@chr11:124461310:124461366:+@chr11:124463225:124465854:+	0.69	0.88	0.83	0.18	0.2	0.64	0.8	0.34	0.88	0.64	0.69	0.18	down
SLC41A3	chr3:127208647:127208758:-@chr3:127207928:127208097:-	0.83	0.86	0.92	0.81	0.73	0.73	0.87	0.756667	0.92	0.81	0.83	0.73	down
SLK	chr10:105757925:105758104:+@chr10:105760564:105760656:+@chr10:105767908:105768037:+	0.79	0.85	0.82	0.44	0.18	0.27	0.82	0.296667	0.85	0.44	0.79	0.18	down
SLX1B-SULT1A4	chr16:29378695:29378807:+@chr16:29380173|29380204:29380355:+	0.07	0.08	0.1	0.3	0.17	0.13	0.0833333	0.2	0.1	0.3	0.07	0.13	up
SMIM7	chr19:16631206:16631258:-@chr19:16625848:16625936:-@chr19:16615954:16619072:-	0.9	0.81	0.75	0.68	0.7	0.65	0.82	0.676667	0.9	0.7	0.75	0.65	down
SMPD4	chr2:130638417:130638488:-@chr2:130635229:130635315:-@chr2:130631294:130631439:-	0.23	0.26	0.27	0.3	0.39	0.44	0.253333	0.376667	0.27	0.44	0.23	0.3	up
STARD3	chr17:35067752:35067805:+@chr17:35068184:35068301:+	0.16	0.2	0.42	0.1	0.08	0.13	0.26	0.103333	0.42	0.13	0.16	0.08	down
STARD3	chr17:35067752:35067809:+@chr17:35068192:35068301:+	0.8	0.78	0.7	0.63	0.58	0.69	0.76	0.633333	0.8	0.69	0.7	0.58	down
SULT1A4	chr16:29378695:29378807:+@chr16:29380173|29380204:29380355:+	0.07	0.08	0.1	0.3	0.17	0.13	0.0833333	0.2	0.1	0.3	0.07	0.13	up
SUMF2	chr7:56108184:56108298:+@chr7:56109773:56109939:+@chr7:56112021:56112076:+	0.82	0.64	0.7	0.84	0.84	0.84	0.72	0.84	0.82	0.84	0.64	0.84	up
SUOX	chr12:54677215:54677390:+@chr12:54679384:54679509:+@chr12:54682263:54682771:+	0.72	0.55	0.58	0.26	0.51	0.36	0.616667	0.376667	0.72	0.51	0.55	0.26	down
SYTL3	chr6:159002289:159002405|159002389:+@chr6:159003770:159006633:+	0.83	0.72	0.69	0.67	0.59	0.57	0.746667	0.61	0.83	0.67	0.69	0.57	down
TBCE	chr1:233644371:233644556:+@chr1:233649355:233649499:+@chr1:233657078:233657259:+	0.74	0.66	0.63	0.84	0.8	0.86	0.676667	0.833333	0.74	0.86	0.63	0.8	up
TCF7L2	chr10:114701154:114701356:+@chr10:114714305:114714373:+@chr10:114789774:114789879:+	0.59	0.52	0.73	0.35	0.37	0.51	0.613333	0.41	0.73	0.51	0.52	0.35	down
TCF7L2	chr10:114895760:114895846:+@chr10:114900732|114900747:114900872:+	0.27	0.35	0.38	0.39	0.59	0.42	0.333333	0.466667	0.38	0.59	0.27	0.39	up
TIA1	chr2:70308371:70308475:-@chr2:70305964:70306029:-@chr2:70305057:70305265:-	0.23	0.27	0.23	0.38	0.29	0.44	0.243333	0.37	0.27	0.44	0.23	0.29	up
TMEM175	chr4:931497:931942:+@chr4:932199|932299:932403:+	0.61	0.61	0.27	0.76	0.69	0.82	0.496667	0.756667	0.61	0.82	0.27	0.69	up
TMEM218	chr11:124477743:124477915:-@chr11:124477423|124477457:124477238:-	0.59	0.38	0.48	0.6	0.68	0.62	0.483333	0.633333	0.59	0.68	0.38	0.6	up
TMEM234	chr1:32453861:32453983:-@chr1:32453324:32453736:-	0.51	0.5	0.48	0.78	0.58	0.52	0.496667	0.626667	0.51	0.78	0.48	0.52	up
TOMM40	chr19:50086317:50086411:+@chr19:50086504|50086507:50086786:+	0.88	0.87	0.89	0.56	0.8	0.68	0.88	0.68	0.89	0.8	0.87	0.56	down
TRAM2-AS1	chr6:52550064:52551150:+@chr6:52551259:52551351:+@chr6:52552132:52552366:+	0.59	0.61	0.68	0.36	0.38	0.34	0.626667	0.36	0.68	0.38	0.59	0.34	down
TRIM26	chr6:30280412:30280521:-@chr6:30276791:30276839:-@chr6:30274422:30274909:-	0.8	0.88	0.87	0.69	0.64	0.57	0.85	0.633333	0.88	0.69	0.8	0.57	down
TRMT1	chr19:13088245:13087960|13087920:-@chr19:13087093:13087280:-	0.07	0.16	0.19	0.25	0.34	0.2	0.14	0.263333	0.19	0.34	0.07	0.2	up
TTC28-AS1	chr22:26661139:26661218:+@chr22:26666008:26666159:+@chr22:26720461:26720641:+@chr22:26723399:26724826:+	0.64	0.6	0.62	0.56	0.41	0.41	0.62	0.46	0.64	0.56	0.6	0.41	down
TTC31	chr2:74572639:74572690|74572686:+@chr2:74572774:74575198:+	0.87	0.88	0.89	0.71	0.81	0.67	0.88	0.73	0.89	0.81	0.87	0.67	down
TTLL7	chr1:84237202:84237426:-@chr1:84171879:84172037:-@chr1:84167407:84167501:-	0.83	0.71	0.75	0.65	0.65	0.6	0.763333	0.633333	0.83	0.65	0.71	0.6	down
UAP1	chr1:160826737:160826925:+@chr1:160829149:160829196:+@chr1:160834206:160834272:+	0.7	0.6	0.6	0.3	0.45	0.56	0.633333	0.436667	0.7	0.56	0.6	0.3	down
UAP1	chr1:160826737:160826925:+@chr1:160829146:160829196:+@chr1:160834206:160834272:+	0.92	0.82	0.95	0.7	0.77	0.81	0.896667	0.76	0.95	0.81	0.82	0.7	down
UBE2C	chr20:43874662:43875510:+@chr20:43876430:43876516:+@chr20:43877436:43877586:+	0.63	0.56	0.75	0.54	0.44	0.48	0.646667	0.486667	0.75	0.54	0.56	0.44	down
USO1	chr4:76933867:76934078:+@chr4:76935513:76935533:+@chr4:76939799:76939909:+	0.52	0.45	0.32	0.02	0.02	0.02	0.43	0.02	0.52	0.02	0.32	0.02	down
USPL1	chr13:30089198:30090193:+@chr13:30091816:30091881:+@chr13:30093210:30093376:+	0.07	0.09	0.07	0.15	0.1	0.3	0.0766667	0.183333	0.09	0.3	0.07	0.1	up
VPS28	chr8:145624680:145624755:-@chr8:145623170|145623482:145623100:-	0.55	0.5	0.33	0.64	0.66	0.56	0.46	0.62	0.55	0.66	0.33	0.56	up
WDR90	chr16:643747:643804:+@chr16:645030:645148:+	0.21	0.26	0.16	0.56	0.33	0.45	0.21	0.446667	0.26	0.56	0.16	0.33	up
XPNPEP3	chr22:39583034:39583195:+@chr22:39586624|39586628:39586743:+	0.22	0.18	0.19	0.28	0.37	0.37	0.196667	0.34	0.22	0.37	0.18	0.28	up
ZBTB38	chr3:142587979:142588469:+@chr3:142597791:142598035:+@chr3:142605459:142605563:+	0.52	0.69	0.64	0.77	0.79	0.74	0.616667	0.766667	0.69	0.79	0.52	0.74	up
ZC3H14	chr14:88145364:88145500:+@chr14:88145809|88145812:88145900:+	0.6	0.64	0.71	0.52	0.56	0.54	0.65	0.54	0.71	0.56	0.6	0.52	down
ZCCHC6	chr9:88106011:88106336:-@chr9:88103934:88104007:-@chr9:88103502:88103565:-	0.67	0.77	0.71	0.25	0.12	0.16	0.716667	0.176667	0.77	0.25	0.67	0.12	down
ZGPAT	chr20:61835383:61835571:+@chr20:61836441:61836620:+	0.57	0.66	0.6	0.52	0.44	0.56	0.61	0.506667	0.66	0.56	0.57	0.44	down
ZGPAT	chr20:61835383:61835508:+@chr20:61836501:61836620:+	0.46	0.56	0.66	0.45	0.45	0.3	0.56	0.4	0.66	0.45	0.46	0.3	down
ZGPAT	chr20:61835383:61835535:+@chr20:61836441:61836620:+	0.49	0.44	0.49	0.38	0.3	0.38	0.473333	0.353333	0.49	0.38	0.44	0.3	down
ZNF146	chr19:41408696:41408863|41408815:+@chr19:41411490:41412441:+	0.34	0.31	0.44	0.45	0.56	0.45	0.363333	0.486667	0.44	0.56	0.31	0.45	up
ZNF195	chr11:3355423:3355706:-@chr11:3351383:3351447:-@chr11:3349383:3349509:-	0.42	0.65	0.39	0.34	0.34	0.36	0.486667	0.346667	0.65	0.36	0.39	0.34	down
ZNF232	chr17:4952945:4953887:-@chr17:4950525|4950552:4949753:-	0.44	0.43	0.31	0.49	0.75	0.6	0.393333	0.613333	0.44	0.75	0.31	0.49	up
ZNF232	chr17:4955095:4955238:-@chr17:4953787|4953887:4953413:-	0.68	0.61	0.8	0.92	0.85	0.87	0.696667	0.88	0.8	0.92	0.61	0.85	up
ZNF41	chrX:47212103:47211753|47211667:-@chrX:47200615:47200757:-	0.15	0.06	0.07	0.17	0.2	0.23	0.0933333	0.2	0.15	0.23	0.06	0.17	up
ZNF655	chr7:98996066:98996254:+@chr7:98997447:98998053:+@chr7:98999422:99000264:+	0.72	0.67	0.7	0.8	0.73	0.91	0.696667	0.813333	0.72	0.91	0.67	0.73	up
ZNF655	chr7:98997447:98997532:+@chr7:98997903:98998053:+@chr7:99007247:99007351:+	0.71	0.72	0.49	0.78	0.77	0.73	0.64	0.76	0.72	0.78	0.49	0.73	up
ZNF680	chr7:63660738:63660947:-@chr7:63641520:63641615:-@chr7:63633632:63633749:-	0.55	0.53	0.54	0.52	0.46	0.33	0.54	0.436667	0.55	0.52	0.53	0.33	down
ZSCAN31	chr6:28411586:28411890:-@chr6:28405470|28405534:28405059:-	0.64	0.57	0.76	0.82	0.81	0.82	0.656667	0.816667	0.76	0.82	0.57	0.81	up
ZSCAN31	chr6:28429618:28432026:-@chr6:28417548|28417551:28417502:-	0.53	0.58	0.66	0.5	0.47	0.4	0.59	0.456667	0.66	0.5	0.53	0.4	down
ZSCAN31	chr6:28429618:28432026:-@chr6:28429074:28429238:-@chr6:28417502:28417551:-@chr6:28412546:28412699:-	0.48	0.44	0.36	0.52	0.52	0.63	0.426667	0.556667	0.48	0.63	0.36	0.52	up
ZSWIM7	chr17:15843558:15843742:-@chr17:15837792:15837817:-@chr17:15831293:15831407:-	0.7	0.58	0.54	0.49	0.44	0.29	0.606667	0.406667	0.7	0.49	0.54	0.29	down

## Sheet: ESRP1__OL_with_SW480
Supplementary File 2. List of alternative splicing targets both in ESRP1 knocking down H358 line and SW480 EpCAMhi/lo , filtered by ΔPSI > 0.1
symbol	event_name	psi_CTRL1	psi_CTRL2	psi_CTRL3	psi_ESRP1	psi_ESRP2	psi_ESRP3	psi_mean_group1	psi_mean_group2	psi_max_group1	psi_max_group2	psi_min_group1	psi_min_group2	change_type
ABCA11P	chr4:456364:456490:-@chr4:421235:421300:-@chr4:406991:410908:-	0.45	0.55	0.51	0.42	0.25	0.39	0.503333	0.353333	0.55	0.42	0.45	0.25	down
AKAP9	chr7:91507924:91508148:+@chr7:91509296:91509436:+@chr7:91509918:91510393:+	0.31	0.33	0.3	0.41	0.56	0.42	0.313333	0.463333	0.33	0.56	0.3	0.41	up
ALDH3A2	chr17:19514953:19515861:+@chr17:19517056|19517112:19517180:+	0.61	0.75	0.82	0.9	0.84	0.86	0.726667	0.866667	0.82	0.9	0.61	0.84	up
ALDOA	chr16:29971951:29972321:+@chr16:29973606:29973749:+@chr16:29973994:29974149:+	0.85	0.85	0.85	0.69	0.83	0.67	0.85	0.73	0.85	0.83	0.85	0.67	down
ALKBH6	chr19:41193636:41193819:-@chr19:41193309:41193387:-	0.48	0.51	0.58	0.75	0.66	0.62	0.523333	0.676667	0.58	0.75	0.48	0.62	up
ALKBH6	chr19:41193636:41193819:-@chr19:41193387|41193425:41193309:-	0.65	0.73	0.73	0.85	0.81	0.82	0.703333	0.826667	0.73	0.85	0.65	0.81	up
AP1B1	chr22:28056367:28056566:-@chr22:28055701:28055709:-@chr22:28053669:28054884:-	0.02	0.02	0.01	0.16	0.13	0.13	0.0166667	0.14	0.02	0.16	0.01	0.13	up
APLP2	chr11:129497333:129497618:+@chr11:129498717:129498884:+@chr11:129501805:129501935:+	0.67	0.66	0.68	0.39	0.41	0.4	0.67	0.4	0.68	0.41	0.66	0.39	down
ARHGEF11	chr1:155175964:155176326:-@chr1:155174834:155174875:-@chr1:155173665:155173912:-	0.09	0.09	0.14	0.35	0.31	0.41	0.106667	0.356667	0.14	0.41	0.09	0.31	up
ARHGEF11	chr1:155175964:155176326:-@chr1:155174834:155174929:-@chr1:155173665:155173912:-	0.08	0.08	0.07	0.6	0.74	0.54	0.0766667	0.626667	0.08	0.74	0.07	0.54	up
ARID1B	chr6:157536813:157536943:+@chr6:157537673:157537831:+@chr6:157543795:157544004:+	0.49	0.47	0.54	0.36	0.43	0.37	0.5	0.386667	0.54	0.43	0.47	0.36	down
ARL16	chr17:77260448:77260561:-@chr17:77259469:77260110:-	0.21	0.24	0.2	0.38	0.41	0.32	0.216667	0.37	0.24	0.41	0.2	0.32	up
ARL16	chr17:77260448:77261168:-@chr17:77259584|77260110:77259469:-	0.47	0.54	0.64	0.43	0.35	0.4	0.55	0.393333	0.64	0.43	0.47	0.35	down
ARL16	chr17:77260448:77261168:-@chr17:77259926:77260110:-@chr17:77259469:77259584:-	0.34	0.36	0.49	0.26	0.23	0.26	0.396667	0.25	0.49	0.26	0.34	0.23	down
ARL16	chr17:77260971:77261169:-@chr17:77259584|77260561:77259469:-	0.85	0.84	0.74	0.7	0.7	0.72	0.81	0.706667	0.85	0.72	0.74	0.7	down
ATP2C2	chr16:83050227:83050295:+@chr16:83050377:83050493:+	0.44	0.27	0.26	0.16	0.25	0.21	0.323333	0.206667	0.44	0.25	0.26	0.16	down
BAIAP2	chr17:76696859:76696904:+@chr17:76699309:76699354:+@chr17:76704165:76704620:+	0.52	0.47	0.61	0.24	0.23	0.36	0.533333	0.276667	0.61	0.36	0.47	0.23	down
BAZ2B	chr2:159902529:159902324|159902219:-@chr2:159901699:159901834:-	0.41	0.44	0.45	0.63	0.66	0.76	0.433333	0.683333	0.45	0.76	0.41	0.63	up
BCL2L12	chr19:54861754:54861868:+@chr19:54862091:54862230:+@chr19:54863920:54864006:+	0.66	0.74	0.77	0.79	0.9	0.92	0.723333	0.87	0.77	0.92	0.66	0.79	up
BMP1	chr8:22110698:22110878:+@chr8:22114576|22115266:22115386:+	0.66	0.66	0.6	0.74	0.82	0.77	0.64	0.776667	0.66	0.82	0.6	0.74	up
BMP1	chr8:22110698:22110878:+@chr8:22114576|22115261:22115386:+	0.23	0.22	0.22	0.33	0.32	0.32	0.223333	0.323333	0.23	0.33	0.22	0.32	up
CALHM2	chr10:105201903:105202152:-@chr10:105200948|105201032:105200830:-	0.7	0.65	0.61	0.82	0.85	0.83	0.653333	0.833333	0.7	0.85	0.61	0.82	up
CCDC14	chr3:125157892:125158332:-@chr3:125157583:125157652:-@chr3:125150401:125150669:-	0.77	0.76	0.5	0.78	0.88	0.87	0.676667	0.843333	0.77	0.88	0.5	0.78	up
CD44	chr11:35167785:35168188:+@chr11:35176244:35176369:+@chr11:35188088:35188177:+@chr11:35192975:35193037:+	0.93	0.93	0.92	0.85	0.57	0.45	0.926667	0.623333	0.93	0.85	0.92	0.45	down
CD44	chr11:35167785:35168188:+@chr11:35174869:35174997:+@chr11:35176244:35176369:+	0.21	0.24	0.24	0.08	0.1	0.15	0.23	0.11	0.24	0.15	0.21	0.08	down
CD44	chr11:35179205:35179318:+@chr11:35179791:35179910:+@chr11:35182635:35182782:+	0.95	0.93	0.93	0.73	0.76	0.6	0.936667	0.696667	0.95	0.76	0.93	0.6	down
CD44	chr11:35167785:35168188:+@chr11:35176244:35176369:+@chr11:35182635:35182763:+@chr11:35186228:35186329:+	0.18	0.22	0.25	0.4	0.45	0.3	0.216667	0.383333	0.25	0.45	0.18	0.3	up
CD44	chr11:35167785:35168188:+@chr11:35176244:35176369:+@chr11:35179205:35179318:+	0.88	0.88	0.86	0.59	0.25	0.18	0.873333	0.34	0.88	0.59	0.86	0.18	down
CD44	chr11:35182635:35182763:+@chr11:35184238:35184366:+@chr11:35186228:35186329:+	0.91	0.9	0.92	0.78	0.66	0.67	0.91	0.703333	0.92	0.78	0.9	0.66	down
CD44	chr11:35167958:35168095:+@chr11:35189369:35189572:+@chr11:35192975:35193037:+	0.9	0.86	0.87	0.59	0.65	0.69	0.876667	0.643333	0.9	0.69	0.86	0.59	down
CD44	chr11:35167785:35168188:+@chr11:35176271:35176369:+@chr11:35179205:35179318:+	0.44	0.49	0.61	0.12	0.04	0.05	0.513333	0.07	0.61	0.12	0.44	0.04	down
CD44	chr11:35167785:35168188:+@chr11:35188088:35188177:+@chr11:35189369:35190301:+	0.98	0.98	0.96	0.92	0.78	0.83	0.973333	0.843333	0.98	0.92	0.96	0.78	down
CD44	chr11:35167785:35168188:+@chr11:35176244|35176271:35176369:+	0.96	0.97	0.93	0.88	0.69	0.44	0.953333	0.67	0.97	0.88	0.93	0.44	down
CD44	chr11:35167785:35168188:+@chr11:35184235:35184366:+@chr11:35186228:35186329:+	0.22	0.24	0.22	0.07	0.05	0.08	0.226667	0.0666667	0.24	0.08	0.22	0.05	down
CD44	chr11:35167785:35168188:+@chr11:35182635:35182763:+@chr11:35184235:35184366:+	0.82	0.94	0.95	0.58	0.53	0.51	0.903333	0.54	0.95	0.58	0.82	0.51	down
CD44	chr11:35179205:35179318:+@chr11:35179794:35179910:+@chr11:35182635:35182782:+	0.94	0.91	0.94	0.74	0.76	0.62	0.93	0.706667	0.94	0.76	0.91	0.62	down
CD46	chr1:206025587:206025650:+@chr1:206030221:206030313:+@chr1:206033487:206035484:+	0.36	0.32	0.32	0.5	0.53	0.44	0.333333	0.49	0.36	0.53	0.32	0.44	up
CD47	chr3:109253476:109255521:-@chr3:109252115:109252139:-@chr3:109244629:109248829:-	0.47	0.5	0.43	0.2	0.15	0.18	0.466667	0.176667	0.5	0.2	0.43	0.15	down
CDPF1	chr22:45024817:45025240:-@chr22:45022733:45022845:-@chr22:45021667:45021782:-	0.84	0.75	0.75	0.54	0.68	0.6	0.78	0.606667	0.84	0.68	0.75	0.54	down
CLEC2D	chr12:9699736:9699842:+@chr12:9700431:9700560:+@chr12:9700784:9702285:+	0.4	0.38	0.35	0.3	0.28	0.2	0.376667	0.26	0.4	0.3	0.35	0.2	down
CLIP1	chr12:121473021:121473128:-@chr12:121467827:121467963:-@chr12:121450632:121450743:-@chr12:121430868:121431058:-	0.7	0.78	0.7	0.6	0.61	0.49	0.726667	0.566667	0.78	0.61	0.7	0.49	down
CLSTN1	chr1:9723739:9723905:-@chr1:9720143:9720199:-@chr1:9718530:9718687:-	0.26	0.22	0.29	0.57	0.61	0.61	0.256667	0.596667	0.29	0.61	0.22	0.57	up
CTNND1	chr11:57285810:57286094:+@chr11:57313085:57313203:+@chr11:57315433:57315721:+	0.12	0.17	0.23	0.62	0.68	0.7	0.173333	0.666667	0.23	0.7	0.12	0.62	up
CTNND1	chr11:57339439:57339548:+@chr11:57339963:57340049:+@chr11:57340345:57343233:+	0.2	0.19	0.2	0.09	0.07	0.09	0.196667	0.0833333	0.2	0.09	0.19	0.07	down
CTNND1	chr11:57285810:57286167:+@chr11:57315433|57315540:57315721:+	0.29	0.24	0.33	0.7	0.84	0.86	0.286667	0.8	0.33	0.86	0.24	0.7	up
CTNND1	chr11:57285810:57286094:+@chr11:57315433:57315721:+@chr11:57318058:57318129:+	0.06	0.05	0.05	0.18	0.16	0.19	0.0533333	0.176667	0.06	0.19	0.05	0.16	up
DEPDC1	chr1:68722221:68722361:-@chr1:68720912:68721168:-@chr1:68719711:68719883:-	0.59	0.49	0.49	0.36	0.4	0.41	0.523333	0.39	0.59	0.41	0.49	0.36	down
DEPDC1	chr1:68722221:68722361:-@chr1:68720317:68721168:-@chr1:68719711:68719883:-	0.8	0.74	0.7	0.64	0.62	0.64	0.746667	0.633333	0.8	0.64	0.7	0.62	down
DESI1	chr22:40346702:40347017:-@chr22:40333212:40333281:-@chr22:40329994:40330103:-	0.61	0.6	0.7	0.54	0.59	0.39	0.636667	0.506667	0.7	0.59	0.6	0.39	down
DNMT3B	chr20:30853852:30853937:+@chr20:30857676:30857794:+@chr20:30859229:30860826:+	0.9	0.75	0.55	0.34	0.38	0.4	0.733333	0.373333	0.9	0.4	0.55	0.34	down
DNMT3B	chr20:30853852:30853937:+@chr20:30856805:30856874:+@chr20:30857676:30857794:+	0.85	0.81	0.77	0.64	0.45	0.72	0.81	0.603333	0.85	0.72	0.77	0.45	down
DNMT3B	chr20:30832820:30832881:+@chr20:30836225:30836326:+@chr20:30838697:30838918:+	0.27	0.17	0.26	0.46	0.47	0.52	0.233333	0.483333	0.27	0.52	0.17	0.46	up
DPM1	chr20:48991975:48992144:-@chr20:48991049:48991153:-@chr20:48990809:48990899:-	0.6	0.62	0.61	0.63	0.83	0.74	0.61	0.733333	0.62	0.83	0.6	0.63	up
DPP7	chr9:139128736:139128849:-@chr9:139128516:139128651:-	0.25	0.28	0.17	0.32	0.4	0.39	0.233333	0.37	0.28	0.4	0.17	0.32	up
DUXAP10	chr14:18719977:18720126:+@chr14:18722244:18722354:+@chr14:18723625:18723772:+	0.48	0.51	0.49	0.59	0.61	0.61	0.493333	0.603333	0.51	0.61	0.48	0.59	up
EDRF1	chr10:127404241:127404397:+@chr10:127407562:127407663:+@chr10:127407917:127408038:+	0.51	0.58	0.61	0.32	0.27	0.33	0.566667	0.306667	0.61	0.33	0.51	0.27	down
ELMOD3	chr2:85436189:85436530|85436232:+@chr2:85437601:85438376:+	0.77	0.72	0.76	0.62	0.61	0.69	0.75	0.64	0.77	0.69	0.72	0.61	down
ENDOV	chr17:76003543:76004216:+@chr17:76006176:76006340:+@chr17:76010535:76010640:+@chr17:76011915:76012211:+	0.3	0.24	0.36	0.38	0.48	0.56	0.3	0.473333	0.36	0.56	0.24	0.38	up
EP400	chr12:131030192:131030291:+@chr12:131031987:131032094:+@chr12:131032591:131033467:+	0.49	0.47	0.35	0.6	0.6	0.76	0.436667	0.653333	0.49	0.76	0.35	0.6	up
ERI3	chr1:44593151:44593526:-@chr1:44591109:44591168:-@chr1:44577304:44577581:-	0.73	0.73	0.69	0.83	0.78	0.93	0.716667	0.846667	0.73	0.93	0.69	0.78	up
ETV4	chr17:38978168:38978562:-@chr17:38977869:38977905:-@chr17:38969027:38969373:-	0.57	0.58	0.56	0.55	0.37	0.29	0.57	0.403333	0.58	0.55	0.56	0.29	down
EWSR1	chr22:27999727:27999853:+@chr22:28000254|28000257:28000271:+	0.24	0.22	0.38	0.51	0.46	0.42	0.28	0.463333	0.38	0.51	0.22	0.42	up
EXOC7	chr17:71602090:71602257:-@chr17:71598005:71598073:-@chr17:71596851:71596996:-	0.49	0.5	0.51	0.39	0.39	0.39	0.5	0.39	0.51	0.39	0.49	0.39	down
EXOC7	chr17:71602090:71602257:-@chr17:71598819:71598911:-@chr17:71598001:71598073:-	0.52	0.41	0.46	0.81	0.71	0.81	0.463333	0.776667	0.52	0.81	0.41	0.71	up
FAM192A	chr16:55777234:55777477:-@chr16:55770219:55770265:-@chr16:55766033:55766101:-@chr16:55765141:55765282:-	0.35	0.49	0.38	0.25	0.26	0.11	0.406667	0.206667	0.49	0.26	0.35	0.11	down
FAM192A	chr16:55777238:55777451:-@chr16:55769915:55770265:-@chr16:55765582:55765699:-	0.49	0.39	0.42	0.33	0.31	0.33	0.433333	0.323333	0.49	0.33	0.39	0.31	down
FAM193B	chr5:176892050:176892248:-@chr5:176891560:176891807:-@chr5:176890889:176891128:-	0.36	0.35	0.41	0.24	0.3	0.19	0.373333	0.243333	0.41	0.3	0.35	0.19	down
FAM193B	chr5:176892050:176892248:-@chr5:176891763:176891807:-@chr5:176890889:176891128:-	0.18	0.13	0.33	0.08	0.07	0.1	0.213333	0.0833333	0.33	0.1	0.13	0.07	down
FAM86B3P	chr8:8131890:8132207:+@chr8:8136473:8136612:+@chr8:8139031:8139797:+	0.29	0.45	0.28	0.58	0.5	0.54	0.34	0.54	0.45	0.58	0.28	0.5	up
FIGNL1	chr7:50484915:50484755|50484737:-@chr7:50483373:50483481:-	0.47	0.47	0.5	0.28	0.45	0.32	0.48	0.35	0.5	0.45	0.47	0.28	down
FLNB	chr3:58099049:58099296:+@chr3:58102625:58102663:+@chr3:58103417:58103519:+	0.94	0.87	0.92	0.51	0.54	0.48	0.91	0.51	0.94	0.54	0.87	0.48	down
FLNB	chr3:58099049:58099296:+@chr3:58102625:58102696:+@chr3:58103417:58103519:+	0.97	0.93	0.96	0.71	0.74	0.73	0.953333	0.726667	0.97	0.74	0.93	0.71	down
FZD3	chr8:28407642:28407779:+@chr8:28413369:28413414:+@chr8:28416106:28416638:+	0.59	0.55	0.54	0.75	0.68	0.65	0.56	0.693333	0.59	0.75	0.54	0.65	up
GALT	chr9:34636659:34637255:+@chr9:34637472|34637538:34637564:+	0.18	0.21	0.31	0.43	0.34	0.36	0.233333	0.376667	0.31	0.43	0.18	0.34	up
GAS5	chr1:172100990:172101308:-@chr1:172100245:172100267:-@chr1:172099662:172100065:-	0.23	0.16	0.2	0.11	0.06	0.12	0.196667	0.0966667	0.23	0.12	0.16	0.06	down
GATS	chr7:99658156:99658279:-@chr7:99648606:99648692:-@chr7:99636212:99638162:-	0.23	0.21	0.25	0.36	0.34	0.33	0.23	0.343333	0.25	0.36	0.21	0.33	up
GATS	chr7:99659441:99659634:-@chr7:99658156:99658279:-@chr7:99636212:99638162:-	0.39	0.44	0.41	0.23	0.35	0.21	0.413333	0.263333	0.44	0.35	0.39	0.21	down
GCAT	chr22:36533858:36534116:+@chr22:36535902:36536110:+@chr22:36538840:36539029:+	0.8	0.79	0.49	0.84	0.83	0.82	0.693333	0.83	0.8	0.84	0.49	0.82	up
GLYCTK	chr3:52300016:52300167:+@chr3:52301316:52301625:+@chr3:52302102:52302248:+	0.74	0.73	0.65	0.82	0.84	0.82	0.706667	0.826667	0.74	0.84	0.65	0.82	up
GLYCTK	chr3:52300016:52300167:+@chr3:52301316|52302102:52302248:+	0.77	0.71	0.69	0.88	0.87	0.79	0.723333	0.846667	0.77	0.88	0.69	0.79	up
GORASP1	chr3:39117372:39117283|39117242:-@chr3:39116800:39116998:-	0.82	0.93	0.83	0.69	0.63	0.79	0.86	0.703333	0.93	0.79	0.82	0.63	down
GRHL1	chr2:10016366:10019016:+@chr2:10020035:10020111:+@chr2:10021466:10021622:+	0.81	0.8	0.85	0.62	0.54	0.55	0.82	0.57	0.85	0.62	0.8	0.54	down
GSN	chr9:123083569:123083661:+@chr9:123083974:123084052:+@chr9:123084538:123084649:+@chr9:123104062:123104266:+	0.16	0.06	0.09	0.17	0.18	0.44	0.103333	0.263333	0.16	0.44	0.06	0.17	up
HPS1	chr10:100183838:100183730|100183687:-@chr10:100180878:100181038:-	0.32	0.41	0.37	0.55	0.43	0.72	0.366667	0.566667	0.41	0.72	0.32	0.43	up
HPS1	chr10:100183730:100183838:-@chr10:100180878:100181038:-@chr10:100180249:100180417:-	0.9	0.83	0.85	0.76	0.75	0.71	0.86	0.74	0.9	0.76	0.83	0.71	down
ICAM2	chr17:59437723:59438025:-@chr17:59437470:59437585:-@chr17:59434955:59436465:-	0.2	0.27	0.16	0.29	0.39	0.31	0.21	0.33	0.27	0.39	0.16	0.29	up
IDH3A	chr15:76236305:76236559:+@chr15:76236945:76237028:+	0.22	0.16	0.22	0.51	0.44	0.23	0.2	0.393333	0.22	0.51	0.16	0.23	up
INF2	chr14:104251585:104252238:+@chr14:104252666:104252722:+@chr14:104256177:104256994:+	0.93	0.93	0.94	0.67	0.73	0.68	0.933333	0.693333	0.94	0.73	0.93	0.67	down
IRF2	chr4:185576680:185576856:-@chr4:185566306:185566423:-@chr4:185557063:185557227:-	0.81	0.67	0.78	0.88	0.88	0.83	0.753333	0.863333	0.81	0.88	0.67	0.83	up
ITGA6	chr2:173070949:173071074:+@chr2:173074746:173074875:+@chr2:173077065:173079433:+	0.74	0.73	0.68	0.35	0.37	0.33	0.716667	0.35	0.74	0.37	0.68	0.33	down
KIAA0754	chr1:39718057:39718268:+@chr1:39719179:39719289:+@chr1:39722860:39725246:+	0.8	0.76	0.77	0.59	0.63	0.68	0.776667	0.633333	0.8	0.68	0.76	0.59	down
KIAA0895L	chr16:65774666:65775444:-@chr16:65773010:65773101:-@chr16:65771445:65772070:-	0.34	0.28	0.24	0.37	0.5	0.36	0.286667	0.41	0.34	0.5	0.24	0.36	up
KIAA0895L	chr16:65774666:65775444:-@chr16:65772994:65773101:-@chr16:65771445:65772070:-	0.3	0.26	0.27	0.39	0.44	0.33	0.276667	0.386667	0.3	0.44	0.26	0.33	up
KIAA0895L	chr16:65774666:65775444:-@chr16:65772962:65773101:-@chr16:65771445:65772070:-	0.47	0.39	0.47	0.57	0.61	0.53	0.443333	0.57	0.47	0.61	0.39	0.53	up
KIF13A	chr6:17880118:17880269:-@chr6:17879324:17879428:-@chr6:17871903:17873156:-	0.88	0.82	0.86	0.51	0.45	0.44	0.853333	0.466667	0.88	0.51	0.82	0.44	down
KIFC3	chr16:56356992:56357053:-@chr16:56356872:56356886:-	0.66	0.46	0.65	0.42	0.44	0.45	0.59	0.436667	0.66	0.45	0.46	0.42	down
LAS1L	chrX:64671085:64671416:-@chrX:64670215:64670340:-@chrX:64669166:64669235:-	0.74	0.71	0.72	0.97	0.98	0.96	0.723333	0.97	0.74	0.98	0.71	0.96	up
LINC01089	chr12:120724920:120726042:-@chr12:120724092|120724097:120723996:-	0.87	0.87	0.83	0.73	0.61	0.55	0.856667	0.63	0.87	0.73	0.83	0.55	down
LINC01184	chr5:127446561:127446907:-@chr5:127425965:127426091:-@chr5:127424735:127424835:-	0.06	0.03	0.09	0.34	0.1	0.14	0.06	0.193333	0.09	0.34	0.03	0.1	up
LINC01184	chr5:127446326:127447337:-@chr5:127445782|127445785:127445564:-	0.63	0.48	0.57	0.28	0.38	0.38	0.56	0.346667	0.63	0.38	0.48	0.28	down
LOC101927027	chr2:178999339:178999653|178999478:+@chr2:179003668:179003862:+	0.43	0.52	0.54	0.55	0.81	0.63	0.496667	0.663333	0.54	0.81	0.43	0.55	up
LOC101928143	chr14:72818820:72818966:-@chr14:72815742:72815885:-@chr14:72811568:72813754:-	0.63	0.64	0.62	0.51	0.48	0.48	0.63	0.49	0.64	0.51	0.62	0.48	down
LOC101928160	chr8:144838667:144839225:+@chr8:144841539:144841636:+@chr8:144842820:144843459:+@chr8:144844215:144844281:+	0.75	0.83	0.83	0.72	0.7	0.69	0.803333	0.703333	0.83	0.72	0.75	0.69	down
LOC101928160	chr8:144838667:144839225:+@chr8:144841075:144841172:+@chr8:144842820:144843459:+@chr8:144844215:144844281:+	0.88	0.88	0.78	0.74	0.69	0.67	0.846667	0.7	0.88	0.74	0.78	0.67	down
LOC374443	chr12:9699736:9699842:+@chr12:9700431:9700560:+@chr12:9700784:9702285:+	0.4	0.38	0.35	0.3	0.28	0.2	0.376667	0.26	0.4	0.3	0.35	0.2	down
LRRC14	chr8:145714563:145715007:+@chr8:145715807|145715893:145716246:+	0.49	0.44	0.31	0.67	0.74	0.68	0.413333	0.696667	0.49	0.74	0.31	0.67	up
LSR	chr19:40441688:40441807:+@chr19:40445289:40445439:+@chr19:40449102:40449275:+	0.13	0.13	0.13	0.32	0.32	0.35	0.13	0.33	0.13	0.35	0.13	0.32	up
LSR	chr19:40441688:40441807:+@chr19:40445289:40445435:+@chr19:40449102:40449275:+	0.24	0.24	0.24	0.53	0.52	0.55	0.24	0.533333	0.24	0.55	0.24	0.52	up
LSR	chr19:40441688:40441807:+@chr19:40445239:40445435:+@chr19:40449102:40449275:+	0.12	0.11	0.11	0.29	0.31	0.32	0.113333	0.306667	0.12	0.32	0.11	0.29	up
LSR	chr19:40441688:40441807:+@chr19:40444668:40444724:+@chr19:40445239:40445435:+@chr19:40449102:40449275:+	0.61	0.64	0.56	0.91	0.85	0.9	0.603333	0.886667	0.64	0.91	0.56	0.85	up
MACF1	chr1:39718057:39718268:+@chr1:39719179:39719289:+@chr1:39722860:39725246:+	0.8	0.76	0.77	0.59	0.63	0.68	0.776667	0.633333	0.8	0.68	0.76	0.59	down
MIGA2	chr9:130870298:130871075|130870432:+@chr9:130871176:130872301:+	0.8	0.75	0.7	0.86	0.84	0.88	0.75	0.86	0.8	0.88	0.7	0.84	up
MIGA2	chr9:130870298:130870436|130870432:+@chr9:130871176:130872301:+	0.19	0.17	0.14	0.27	0.3	0.31	0.166667	0.293333	0.19	0.31	0.14	0.27	up
MIR4435-2	chr2:111818109:111818285:-@chr2:111722196:111722289:-@chr2:111713850:111714044:-	0.81	0.88	0.82	0.62	0.59	0.69	0.836667	0.633333	0.88	0.69	0.81	0.59	down
MIR4435-2HG	chr2:111818109:111818285:-@chr2:111722196:111722289:-@chr2:111713850:111714044:-	0.81	0.88	0.82	0.62	0.59	0.69	0.836667	0.633333	0.88	0.69	0.81	0.59	down
MIR4685	chr10:100183730:100183838:-@chr10:100180878:100181038:-@chr10:100180249:100180417:-	0.9	0.83	0.85	0.76	0.75	0.71	0.86	0.74	0.9	0.76	0.83	0.71	down
MIR4685	chr10:100183838:100183730|100183687:-@chr10:100180878:100181038:-	0.32	0.41	0.37	0.55	0.43	0.72	0.366667	0.566667	0.41	0.72	0.32	0.43	up
MIR4730	chr17:76003543:76004216:+@chr17:76006176:76006340:+@chr17:76010535:76010640:+@chr17:76011915:76012211:+	0.3	0.24	0.36	0.38	0.48	0.56	0.3	0.473333	0.36	0.56	0.24	0.38	up
MIR937	chr8:144962767:144963183:-@chr8:144961710:144961772:-@chr8:144961082:144961171:-	0.08	0.06	0.12	0.55	0.48	0.44	0.0866667	0.49	0.12	0.55	0.06	0.44	up
MORF4L2	chrX:102820184:102820085|102820079:-@chrX:102817078:102818635:-	0.41	0.46	0.44	0.53	0.61	0.52	0.436667	0.553333	0.46	0.61	0.41	0.52	up
MORF4L2	chrX:102826265:102826327:-@chrX:102820184|102820235:102820083:-	0.55	0.75	0.62	0.5	0.52	0.54	0.64	0.52	0.75	0.54	0.55	0.5	down
MPDU1	chr17:7430734:7430880:+@chr17:7431203:7431313:+	0.1	0.08	0.06	0.32	0.28	0.2	0.08	0.266667	0.1	0.32	0.06	0.2	up
MPDU1	chr17:7430734:7430880|7430819:+@chr17:7431203:7431313:+	0.85	0.81	0.84	0.65	0.47	0.75	0.833333	0.623333	0.85	0.75	0.81	0.47	down
MTERF4	chr2:241690341:241690420:-@chr2:241685331:241685515:-@chr2:241682365:241682520:-	0.92	0.86	0.76	0.7	0.56	0.75	0.846667	0.67	0.92	0.75	0.76	0.56	down
MYOF	chr10:95145889:95145971:-@chr10:95142664:95142702:-@chr10:95138777:95138901:-	0.35	0.41	0.47	0.83	0.85	0.85	0.41	0.843333	0.47	0.85	0.35	0.83	up
NAT9	chr17:70283356:70283985:-@chr17:70281727:70281789:-@chr17:70281600:70281673:-@chr17:70280330:70281419:-	0.56	0.48	0.61	0.77	0.63	0.68	0.55	0.693333	0.61	0.77	0.48	0.63	up
NAV2	chr11:20026850:20027317:+@chr11:20027958:20028023:+@chr11:20029411:20029455:+	0.37	0.47	0.32	0.62	0.68	0.61	0.386667	0.636667	0.47	0.68	0.32	0.61	up
NCALD	chr8:102997213:102997262:-@chr8:102968545:102968631:-@chr8:102832002:102832091:-@chr8:102800656:102801052:-	0.05	0.05	0.16	0.25	0.2	0.48	0.0866667	0.31	0.16	0.48	0.05	0.2	up
NDUFAF7	chr2:37322225:37323340|37322284:+@chr2:37324510:37324620:+	0.55	0.74	0.73	0.44	0.47	0.37	0.673333	0.426667	0.74	0.47	0.55	0.37	down
NEIL2	chr8:11666364:11666508|11666503:+@chr8:11674516:11674868:+	0.3	0.35	0.26	0.2	0.19	0.1	0.303333	0.163333	0.35	0.2	0.26	0.1	down
NF2	chr22:28407428:28407590:+@chr22:28409009:28409068:+@chr22:28420741:28424593:+	0.54	0.66	0.5	0.36	0.3	0.39	0.566667	0.35	0.66	0.39	0.5	0.3	down
NF2	chr22:28407428:28407590:+@chr22:28409009:28409053:+@chr22:28420741:28424593:+	0.89	0.94	0.9	0.75	0.68	0.77	0.91	0.733333	0.94	0.77	0.89	0.68	down
NF2	chr22:28329545:28330101:+@chr22:28365079:28365201:+@chr22:28368191:28368274:+	0.3	0.23	0.3	0.48	0.39	0.4	0.276667	0.423333	0.3	0.48	0.23	0.39	up
NF2	chr22:28409009:28409053:+@chr22:28409690:28409904:+	0.3	0.51	0.37	0.66	0.77	0.65	0.393333	0.693333	0.51	0.77	0.3	0.65	up
NUMB	chr14:72818820:72818966:-@chr14:72815742:72815885:-@chr14:72811568:72813754:-	0.63	0.64	0.62	0.51	0.48	0.48	0.63	0.49	0.64	0.51	0.62	0.48	down
NUP88	chr17:5232846:5233004:-@chr17:5231964|5231996:5231823:-	0.64	0.24	0.24	0.13	0.13	0.08	0.373333	0.113333	0.64	0.13	0.24	0.08	down
PDLIM7	chr5:176852012:176852042:-@chr5:176851414:176851532:-@chr5:176850617:176851027:-	0.8	0.93	0.87	0.74	0.57	0.77	0.866667	0.693333	0.93	0.77	0.8	0.57	down
PICK1	chr22:36799726:36799776:+@chr22:36800260:36800404:+	0.31	0.19	0.36	0.45	0.4	0.38	0.286667	0.41	0.36	0.45	0.19	0.38	up
PIGQ	chr16:569070:569181:+@chr16:570184|570859:570973:+	0.6	0.47	0.33	0.62	0.75	0.74	0.466667	0.703333	0.6	0.75	0.33	0.62	up
POMT1	chr9:133375111:133375270:+@chr9:133375468:133375623:+	0.82	0.75	0.82	0.74	0.59	0.6	0.796667	0.643333	0.82	0.74	0.75	0.59	down
PPP1R12A	chr12:78708378:78708394:-@chr12:78707509:78707591:-@chr12:78704688:78706694:-	0.11	0.11	0.16	0.26	0.39	0.27	0.126667	0.306667	0.16	0.39	0.11	0.26	up
PRICKLE4	chr6:41859178:41859321:+@chr6:41859450:41859954:+	0.87	0.89	0.87	0.81	0.63	0.76	0.876667	0.733333	0.89	0.81	0.87	0.63	down
RAB6A	chr11:73109539:73109592:-@chr11:73107478:73107583:-@chr11:73107306:73107411:-@chr11:73104944:73105055:-	0.49	0.4	0.41	0.56	0.62	0.56	0.433333	0.58	0.49	0.62	0.4	0.56	up
RTN3	chr11:63228899:63228955:+@chr11:63242750:63245080:+@chr11:63270995:63271072:+@chr11:63274039:63274471:+	0.32	0.32	0.33	0.48	0.43	0.54	0.323333	0.483333	0.33	0.54	0.32	0.43	up
SAT1	chrX:23711211:23711747:+@chrX:23711838:23712129:+@chrX:23713366:23713467:+	0.61	0.62	0.61	0.44	0.49	0.51	0.613333	0.48	0.62	0.51	0.61	0.44	down
SAT1	chrX:23711211:23711747:+@chrX:23711838:23712441:+@chrX:23713366:23713467:+	0.93	0.93	0.88	0.78	0.76	0.8	0.913333	0.78	0.93	0.8	0.88	0.76	down
SCRIB	chr8:144962767:144963183:-@chr8:144961710:144961772:-@chr8:144961082:144961171:-	0.08	0.06	0.12	0.55	0.48	0.44	0.0866667	0.49	0.12	0.55	0.06	0.44	up
2021-09-06	chrX:118647309:118647499:-@chrX:118636704:118636777:-@chrX:118633715:118634733:-	0.15	0.12	0.13	0.41	0.25	0.57	0.133333	0.41	0.15	0.57	0.12	0.25	up
SLC2A8	chr9:129199237:129199386:+@chr9:129199476:129199638:+@chr9:129202007:129202106:+	0.22	0.2	0.2	0.28	0.3	0.5	0.206667	0.36	0.22	0.5	0.2	0.28	up
SLK	chr10:105757925:105758104:+@chr10:105760564:105760656:+@chr10:105767908:105768037:+	0.79	0.85	0.82	0.44	0.18	0.27	0.82	0.296667	0.85	0.44	0.79	0.18	down
SLMAP	chr3:57883656:57883790:+@chr3:57886612:57886701:+@chr3:57888063:57891305:+	0.49	0.47	0.48	0.61	0.67	0.67	0.48	0.65	0.49	0.67	0.47	0.61	up
SMUG1	chr12:52868566:52869007:-@chr12:52867891|52867956:52867870:-	0.49	0.2	0.33	0.69	0.51	0.68	0.34	0.626667	0.49	0.69	0.2	0.51	up
SUN1	chr7:858772:858830:+@chr7:858973|858976:859115:+	0.51	0.58	0.56	0.68	0.69	0.74	0.55	0.703333	0.58	0.74	0.51	0.68	up
TBC1D5	chr3:17524970:17525101:-@chr3:17444946:17445015:-@chr3:17422914:17423022:-	0.82	0.77	0.78	0.74	0.71	0.51	0.79	0.653333	0.82	0.74	0.77	0.51	down
TCF25	chr16:88492676:88492796|88492785:+@chr16:88494544:88494950:+	0.92	0.87	0.85	0.79	0.68	0.8	0.88	0.756667	0.92	0.8	0.85	0.68	down
TCF7L2	chr10:114701154:114701356:+@chr10:114714305:114714373:+@chr10:114789774:114789879:+	0.59	0.52	0.73	0.35	0.37	0.51	0.613333	0.41	0.73	0.51	0.52	0.35	down
TCF7L2	chr10:114895760:114895846:+@chr10:114900732|114900747:114900872:+	0.27	0.35	0.38	0.39	0.59	0.42	0.333333	0.466667	0.38	0.59	0.27	0.39	up
TRAPPC6B	chr14:38708970:38709794:-@chr14:38707046:38707168:-@chr14:38702201:38702316:-@chr14:38697240:38698505:-	0.31	0.38	0.31	0.26	0.1	0.3	0.333333	0.22	0.38	0.3	0.31	0.1	down
TRMT1	chr19:13088245:13087960|13087920:-@chr19:13087093:13087280:-	0.07	0.16	0.19	0.25	0.34	0.2	0.14	0.263333	0.19	0.34	0.07	0.2	up
TRMT2B	chrX:100193462:100193760:-@chrX:100179562:100179696:-@chrX:100178619:100178718:-	0.49	0.48	0.45	0.8	0.62	0.68	0.473333	0.7	0.49	0.8	0.45	0.62	up
TRMT2B	chrX:100193462:100193760:-@chrX:100183687:100183957:-@chrX:100182962:100183016:-	0.45	0.56	0.6	0.64	0.65	0.8	0.536667	0.696667	0.6	0.8	0.45	0.64	up
TYMP	chr22:49315199:49315855:-@chr22:49314791:49315049:-@chr22:49312728:49313012:-	0.86	0.87	0.91	0.74	0.74	0.84	0.88	0.773333	0.91	0.84	0.86	0.74	down
TYMP	chr22:49315199:49315291:-@chr22:49314791:49315049:-	0.7	0.64	0.66	0.52	0.54	0.5	0.666667	0.52	0.7	0.54	0.64	0.5	down
TYMP	chr22:49315199:49315855:-@chr22:49314791:49315042:-@chr22:49312728:49313012:-	0.85	0.88	0.91	0.75	0.73	0.83	0.88	0.77	0.91	0.83	0.85	0.73	down
TYMP	chr22:49315199:49315855:-@chr22:49314791:49315026:-@chr22:49312728:49313012:-	0.88	0.89	0.93	0.76	0.78	0.84	0.9	0.793333	0.93	0.84	0.88	0.76	down
UPF3B	chrX:118859067:118859249:-@chrX:118858637:118858675:-@chrX:118856358:118856518:-	0.23	0.27	0.27	0.08	0.1	0.14	0.256667	0.106667	0.27	0.14	0.23	0.08	down
USO1	chr4:76933867:76934078:+@chr4:76935513:76935533:+@chr4:76939799:76939909:+	0.52	0.45	0.32	0.02	0.02	0.02	0.43	0.02	0.52	0.02	0.32	0.02	down
USP28	chr11:113251377:113251501:-@chr11:113250449:113250811:-@chr11:113230190:113230267:-	0.27	0.32	0.3	0.55	0.43	0.42	0.296667	0.466667	0.32	0.55	0.27	0.42	up
USP28	chr11:113199537:113199632:-@chr11:113193590:113193626:-@chr11:113191106:113191314:-	0.72	0.77	0.83	0.5	0.68	0.57	0.773333	0.583333	0.83	0.68	0.72	0.5	down
VEGFA	chr6:43854604:43854633:+@chr6:43856447:43856518:+@chr6:43857671:43857802:+	0.26	0.44	0.36	0.17	0.18	0.18	0.353333	0.176667	0.44	0.18	0.26	0.17	down
VPS28	chr8:145624680:145624755:-@chr8:145623170|145623482:145623100:-	0.55	0.5	0.33	0.64	0.66	0.56	0.46	0.62	0.55	0.66	0.33	0.56	up
ZBTB38	chr3:142587979:142588469:+@chr3:142597791:142598035:+@chr3:142605459:142605563:+	0.52	0.69	0.64	0.77	0.79	0.74	0.616667	0.766667	0.69	0.79	0.52	0.74	up
ZCCHC6	chr9:88106011:88106336:-@chr9:88103934:88104007:-@chr9:88103502:88103565:-	0.67	0.77	0.71	0.25	0.12	0.16	0.716667	0.176667	0.77	0.25	0.67	0.12	down
ZFYVE27	chr10:99488209:99488421:+@chr10:99498016:99498111:+@chr10:99499221:99499333:+	0.8	0.8	0.68	0.64	0.4	0.64	0.76	0.56	0.8	0.64	0.68	0.4	down
ZGPAT	chr20:61835383:61835535:+@chr20:61836441:61836620:+	0.49	0.44	0.49	0.38	0.3	0.38	0.473333	0.353333	0.49	0.38	0.44	0.3	down
ZGPAT	chr20:61835383:61835571:+@chr20:61836441:61836620:+	0.57	0.66	0.6	0.52	0.44	0.56	0.61	0.506667	0.66	0.56	0.57	0.44	down
ZGPAT	chr20:61835383:61835508:+@chr20:61836501:61836620:+	0.46	0.56	0.66	0.45	0.45	0.3	0.56	0.4	0.66	0.45	0.46	0.3	down
ZNF133	chr20:18217121:18217248:+@chr20:18234963:18235037:+@chr20:18243716:18245640:+	0.21	0.36	0.3	0.19	0.2	0.13	0.29	0.173333	0.36	0.2	0.21	0.13	down
ZNF707	chr8:144838667:144839225:+@chr8:144841539:144841636:+@chr8:144842820:144843459:+@chr8:144844215:144844281:+	0.75	0.83	0.83	0.72	0.7	0.69	0.803333	0.703333	0.83	0.72	0.75	0.69	down
ZNF707	chr8:144838667:144839225:+@chr8:144841075:144841172:+@chr8:144842820:144843459:+@chr8:144844215:144844281:+	0.88	0.88	0.78	0.74	0.69	0.67	0.846667	0.7	0.88	0.74	0.78	0.67	down
ZNF721	chr4:456364:456490:-@chr4:421235:421300:-@chr4:406991:410908:-	0.45	0.55	0.51	0.42	0.25	0.39	0.503333	0.353333	0.55	0.42	0.45	0.25	down

## Sheet: ESRP2_OL_with_HCT116
Supplementary File 2. List of alternative splicing targets both in ESRP2 knocking down LNCaP line and HCT116 EpCAMhi/lo , filtered by ΔPSI > 0.1
symbol	event_name	psi_LNCaP_LNCap_ESRP2_KD_1	psi_LNCaP_LNCap_ESRP2_KD_2	psi_LNCaP_LNCap_ESRP2_KD_3	psi_LNCaP_LNCap_ESRP2_control_1	psi_LNCaP_LNCap_ESRP2_control_2	psi_LNCaP_LNCap_ESRP2_control_3	psi_mean_group1	psi_mean_group2	psi_max_group1	psi_max_group2	psi_min_group1	psi_min_group2	change_type
ABCB8	chr7:150356443:150356630:+@chr7:150361463:150361624:+@chr7:150362293:150362849:+	0.17	0.24	0.45	0.08	0.14	0.16	0.126667	0.286667	0.16	0.45	0.08	0.17	up
ABCD4	chr14:73839331:73839520:-@chr14:73836606:73836724:-@chr14:73835627:73836131:-	0.87	0.9	0.89	0.67	0.77	0.76	0.733333	0.886667	0.77	0.9	0.67	0.87	up
ABCF3	chr3:185387879:185388243|185387925:+@chr3:185388343:185388465:+	0.48	0.66	0.55	0.75	0.77	0.83	0.783333	0.563333	0.83	0.66	0.75	0.48	down
ABI1	chr10:27094153:27094253:-@chr10:27084590:27084676:-@chr10:27080533:27080718:-	0.72	0.71	0.76	0.44	0.36	0.3	0.366667	0.73	0.44	0.76	0.3	0.71	up
ADGRG1	chr16:56211356:56211549:+@chr16:56213104:56213258:+@chr16:56233000:56233121:+@chr16:56241666:56241768:+	0.27	0.22	0.13	0.06	0.12	0.08	0.0866667	0.206667	0.12	0.27	0.06	0.13	up
AKNAD1	chr1:109307506:109307693:-@chr1:109306454:109306614:-@chr1:109294454:109294593:-	0.33	0.4	0.31	0.48	0.53	0.51	0.506667	0.346667	0.53	0.4	0.48	0.31	down
ANKHD1	chr5:139865493:139865638:+@chr5:139866604:139866746:+@chr5:139869406:139869581:+	0.6	0.76	0.81	0.82	0.9	0.9	0.873333	0.723333	0.9	0.81	0.82	0.6	down
ANKHD1-EIF4EBP3	chr5:139865493:139865638:+@chr5:139866604:139866746:+@chr5:139869406:139869581:+	0.6	0.76	0.81	0.82	0.9	0.9	0.873333	0.723333	0.9	0.81	0.82	0.6	down
ANKRD10	chr13:110356381:110356472:-@chr13:110351369:110351425:-@chr13:110350878:110351042:-@chr13:110343040:110343611:-	0.68	0.75	0.79	0.62	0.61	0.4	0.543333	0.74	0.62	0.79	0.4	0.68	up
ANKRD10	chr13:110356381:110356472:-@chr13:110353824:110353887:-@chr13:110350878:110351042:-@chr13:110343040:110343611:-	0.7	0.73	0.82	0.69	0.4	0.4	0.496667	0.75	0.69	0.82	0.4	0.7	up
APLP2	chr11:129497333:129497618:+@chr11:129498717:129498884:+@chr11:129501805:129501935:+	0.47	0.46	0.49	0.65	0.69	0.69	0.676667	0.473333	0.69	0.49	0.65	0.46	down
APTX	chr9:32979757:32980089:-@chr9:32977758:32977844:-@chr9:32975969:32976028:-	0.7	0.65	0.64	0.81	0.74	0.84	0.796667	0.663333	0.84	0.7	0.74	0.64	down
ARHGAP17	chr16:24849606:24850226:-@chr16:24846506:24846554:-@chr16:24838203:24839082:-	0.69	0.62	0.72	0.48	0.32	0.38	0.393333	0.676667	0.48	0.72	0.32	0.62	up
ARHGEF11	chr1:155175964:155176326:-@chr1:155174875|155174929:155174834:-	0.91	0.92	0.95	0.17	0.17	0.2	0.18	0.926667	0.2	0.95	0.17	0.91	up
ARHGEF11	chr1:155175964:155176326:-@chr1:155174834:155174929:-@chr1:155173665:155173912:-	0.88	0.81	0.9	0.15	0.12	0.12	0.13	0.863333	0.15	0.9	0.12	0.81	up
ARHGEF11	chr1:155175964:155176326:-@chr1:155174834:155174875:-@chr1:155173665:155173912:-	0.67	0.43	0.59	0.1	0.07	0.04	0.07	0.563333	0.1	0.67	0.04	0.43	up
ARL16	chr17:77259878:77260110:-@chr17:77259469:77259584:-	0.59	0.74	0.63	0.75	0.79	0.88	0.806667	0.653333	0.88	0.74	0.75	0.59	down
ARRDC1	chr9:139625306:139627279:+@chr9:139627696|139627733:139627783:+	0.2	0.36	0.26	0.09	0.13	0.11	0.11	0.273333	0.13	0.36	0.09	0.2	up
ARRDC1	chr9:139627169:139627279:+@chr9:139627733:139627783:+	0.51	0.67	0.76	0.38	0.47	0.4	0.416667	0.646667	0.47	0.76	0.38	0.51	up
ARRDC1	chr9:139625306:139627279:+@chr9:139627686|139627733:139627783:+	0.68	0.59	0.66	0.4	0.46	0.41	0.423333	0.643333	0.46	0.68	0.4	0.59	up
BBS2	chr16:55105866:55106093:-@chr16:55102546:55102697:-@chr16:55102272:55102334:-	0.76	0.77	0.75	0.71	0.54	0.65	0.633333	0.76	0.71	0.77	0.54	0.75	up
BCAT2	chr19:54006053:54006272:-@chr19:54003302|54003380:54002825:-	0.76	0.78	0.83	0.62	0.56	0.73	0.636667	0.79	0.73	0.83	0.56	0.76	up
BRD9	chr5:940476:940586:-@chr5:939822|939882:939707:-	0.46	0.53	0.43	0.24	0.38	0.37	0.33	0.473333	0.38	0.53	0.24	0.43	up
BSG	chr19:523162:523701:+@chr19:531379|531646:531782:+	0.35	0.73	0.39	0.29	0.23	0.34	0.286667	0.49	0.34	0.73	0.23	0.35	up
BTN3A3	chr6:26551574:26551649:+@chr6:26551777:26551866:+@chr6:26552164:26554192:+	0.58	0.48	0.42	0.66	0.6	0.67	0.643333	0.493333	0.67	0.58	0.6	0.42	down
C14orf37	chr14:57834426:57834610:-@chr14:57830237:57832282:-@chr14:57829785:57830015:-@chr14:57828106:57828178:-	0.32	0.23	0.25	0.14	0.14	0.13	0.136667	0.266667	0.14	0.32	0.13	0.23	up
C19orf48	chr19:55999641:56000043:-@chr19:55997523:55997683:-@chr19:55997058:55997326:-	0.37	0.3	0.36	0.47	0.62	0.57	0.553333	0.343333	0.62	0.37	0.47	0.3	down
C21orf2	chr21:44575227:44575134|44574774:-@chr21:44573235:44574637:-	0.37	0.26	0.36	0.47	0.52	0.45	0.48	0.33	0.52	0.37	0.45	0.26	down
C6orf48	chr6:31910882:31911207:+@chr6:31912183:31912273:+@chr6:31912992:31913191:+	0.29	0.27	0.3	0.6	0.45	0.51	0.52	0.286667	0.6	0.3	0.45	0.27	down
C6orf48	chr6:31910882:31911207:+@chr6:31912169:31912273:+@chr6:31912992:31913191:+	0.27	0.28	0.29	0.58	0.44	0.5	0.506667	0.28	0.58	0.29	0.44	0.27	down
C6orf48	chr6:31910882:31911207:+@chr6:31912055|31912180:31912277:+	0.4	0.63	0.49	0.36	0.38	0.35	0.363333	0.506667	0.38	0.63	0.35	0.4	up
C6orf48	chr6:31910882:31911207:+@chr6:31912051:31912273:+@chr6:31912992:31913191:+	0.24	0.31	0.27	0.51	0.41	0.41	0.443333	0.273333	0.51	0.31	0.41	0.24	down
C6orf48	chr6:31910882:31911207:+@chr6:31912055|31912180:31912273:+	0.39	0.65	0.47	0.33	0.38	0.37	0.36	0.503333	0.38	0.65	0.33	0.39	up
C6orf48	chr6:31910882:31911207:+@chr6:31912180:31912273:+@chr6:31912992:31913191:+	0.46	0.41	0.44	0.7	0.63	0.63	0.653333	0.436667	0.7	0.46	0.63	0.41	down
C6orf48	chr6:31910882:31911207:+@chr6:31912055:31912273:+@chr6:31912992:31913191:+	0.25	0.31	0.28	0.5	0.4	0.39	0.43	0.28	0.5	0.31	0.39	0.25	down
C6orf48	chr6:31910882:31911207:+@chr6:31912180:31912277:+@chr6:31912992:31913191:+	0.18	0.15	0.17	0.28	0.32	0.22	0.273333	0.166667	0.32	0.18	0.22	0.15	down
C6orf48	chr6:31910882:31911207:+@chr6:31912051|31912055:31912273:+	0.47	0.49	0.41	0.61	0.67	0.79	0.69	0.456667	0.79	0.49	0.61	0.41	down
CCDC66	chr3:56567914:56567978:+@chr3:56568637:56568662:+@chr3:56572752:56573499:+	0.85	0.9	0.82	0.65	0.76	0.79	0.733333	0.856667	0.79	0.9	0.65	0.82	up
CDK16	chrX:46966604:46966723|46966685:+@chrX:46967895:46968178:+	0.12	0.13	0.18	0.33	0.32	0.21	0.286667	0.143333	0.33	0.18	0.21	0.12	down
CHKB-CPT1B	chr22:49364331:49364550:-@chr22:49363844:49363954:-@chr22:49363070:49363229:-	0.69	0.86	0.75	0.87	0.87	0.89	0.876667	0.766667	0.89	0.86	0.87	0.69	down
CLCC1	chr1:109307506:109307693:-@chr1:109306454:109306614:-@chr1:109294454:109294593:-	0.33	0.4	0.31	0.48	0.53	0.51	0.506667	0.346667	0.53	0.4	0.48	0.31	down
COMMD7	chr20:30755952:30755903|30755899:-@chr20:30754166:30755534:-	0.5	0.5	0.4	0.3	0.19	0.21	0.233333	0.466667	0.3	0.5	0.19	0.4	up
CPT1B	chr22:49364331:49364550:-@chr22:49363844:49363954:-@chr22:49363070:49363229:-	0.69	0.86	0.75	0.87	0.87	0.89	0.876667	0.766667	0.89	0.86	0.87	0.69	down
CSNK1E	chr22:37024737:37025155:-@chr22:37021339:37021399:-@chr22:37017891:37020486:-	0.06	0.05	0.06	0.22	0.17	0.24	0.21	0.0566667	0.24	0.06	0.17	0.05	down
CTBP2	chr10:126839386:126839620:-@chr10:126789524:126789652:-@chr10:126717556:126717714:-	0.65	0.66	0.75	0.56	0.62	0.48	0.553333	0.686667	0.62	0.75	0.48	0.65	up
CTNND1	chr11:57313085:57313203:+@chr11:57315433|57315540:57315721:+	0.92	0.91	0.92	0.73	0.59	0.53	0.616667	0.916667	0.73	0.92	0.53	0.91	up
CTNND1	chr11:57285810:57286167:+@chr11:57315433|57315540:57315721:+	0.88	0.91	0.9	0.36	0.31	0.33	0.333333	0.896667	0.36	0.91	0.31	0.88	up
CTNND1	chr11:57285810:57286094:+@chr11:57315542:57315721:+@chr11:57318058:57318129:+	0.42	0.48	0.58	0.1	0.13	0.11	0.113333	0.493333	0.13	0.58	0.1	0.42	up
CTNND1	chr11:57285810:57286094:+@chr11:57315433:57315721:+@chr11:57318058:57318129:+	0.58	0.6	0.7	0.12	0.15	0.15	0.14	0.626667	0.15	0.7	0.12	0.58	up
CTNND1	chr11:57285810:57286094:+@chr11:57315540:57315721:+@chr11:57318058:57318129:+	0.43	0.49	0.58	0.11	0.14	0.12	0.123333	0.5	0.14	0.58	0.11	0.43	up
CTNND1	chr11:57313085:57313203:+@chr11:57315433|57315542:57315721:+	0.91	0.95	0.92	0.77	0.61	0.66	0.68	0.926667	0.77	0.95	0.61	0.91	up
CTNND1	chr11:57285810:57286094:+@chr11:57313085:57313203:+@chr11:57315433:57315721:+	0.62	0.56	0.55	0.24	0.28	0.17	0.23	0.576667	0.28	0.62	0.17	0.55	up
CYB5RL	chr1:54433680:54433985:-@chr1:54428999:54429157:-@chr1:54425913:54426000:-	0.76	0.77	0.67	0.61	0.65	0.58	0.613333	0.733333	0.65	0.77	0.58	0.67	up
DALRD3	chr3:49029211:49029284:-@chr3:49029049:49029110:-@chr3:49028866:49028948:-	0.76	0.75	0.78	0.92	0.88	0.87	0.89	0.763333	0.92	0.78	0.87	0.75	down
DCTD	chr4:184074686:184074555|184074433:-@chr4:184073608:184073722:-	0.46	0.48	0.44	0.49	0.65	0.67	0.603333	0.46	0.67	0.48	0.49	0.44	down
DCTN3	chr9:34604707:34607968:-@chr9:34604039:34604129:-@chr9:34603548:34603898:-	0.28	0.31	0.27	0.17	0.22	0.15	0.18	0.286667	0.22	0.31	0.15	0.27	up
DCUN1D2	chr13:113192983:113193269:-@chr13:113186372|113186512:113186156:-	0.63	0.72	0.69	0.75	0.82	0.88	0.816667	0.68	0.88	0.72	0.75	0.63	down
DCUN1D2	chr13:113192983:113193269:-@chr13:113191406:113191489:-@chr13:113186156:113186512:-	0.24	0.2	0.21	0.34	0.32	0.37	0.343333	0.216667	0.37	0.24	0.32	0.2	down
DCUN1D2	chr13:113192983:113193269:-@chr13:113186372|113186509:113186156:-	0.61	0.7	0.62	0.74	0.78	0.86	0.793333	0.643333	0.86	0.7	0.74	0.61	down
DDIT3	chr12:56197756:56200612:-@chr12:56197509|56197569:56197319:-	0.75	0.67	0.46	0.89	0.77	0.89	0.85	0.626667	0.89	0.75	0.77	0.46	down
DET1	chr15:86890775:86890916:-@chr15:86888846:86888929:-@chr15:86880547:86880616:-@chr15:86874858:86875950:-	0.21	0.37	0.29	0.41	0.55	0.43	0.463333	0.29	0.55	0.37	0.41	0.21	down
DGUOK	chr2:74023807:74023910|74023886:+@chr2:74027354:74029353:+	0.38	0.53	0.59	0.71	0.85	0.79	0.783333	0.5	0.85	0.59	0.71	0.38	down
DGUOK	chr2:74007461:74007687:+@chr2:74013233:74013318:+@chr2:74019545:74019657:+@chr2:74027354:74029353:+	0.66	0.59	0.64	0.58	0.47	0.49	0.513333	0.63	0.58	0.66	0.47	0.59	up
DHRS1	chr14:23835555:23835733:-@chr14:23831376|23831747:23831230:-	0.45	0.59	0.58	0.76	0.84	0.63	0.743333	0.54	0.84	0.59	0.63	0.45	down
DLEU2	chr13:49521721:49521828:-@chr13:49517255:49517369:-@chr13:49515270:49516905:-	0.4	0.16	0.15	0.08	0.09	0.06	0.0766667	0.236667	0.09	0.4	0.06	0.15	up
DNAJB12	chr10:73765695:73765598|73765367:-@chr10:73762594:73764381:-	0.23	0.21	0.23	0.31	0.32	0.36	0.33	0.223333	0.36	0.23	0.31	0.21	down
DNMT3B	chr20:30853852:30853937:+@chr20:30857676:30857794:+@chr20:30859229:30860826:+	0.27	0.12	0.13	0.41	0.3	0.29	0.333333	0.173333	0.41	0.27	0.29	0.12	down
DNMT3B	chr20:30843299:30844237:+@chr20:30846782|30846876:30847001:+	0.22	0.18	0.18	0.09	0.06	0.05	0.0666667	0.193333	0.09	0.22	0.05	0.18	up
DPAGT1	chr11:118474323:118474407:-@chr11:118473384:118473471:-@chr11:118473062:118473217:-	0.77	0.64	0.66	0.85	0.86	0.89	0.866667	0.69	0.89	0.77	0.85	0.64	down
DPH2	chr1:44208855:44208985|44208969:+@chr1:44209225:44209794:+	0.32	0.27	0.56	0.2	0.18	0.23	0.203333	0.383333	0.23	0.56	0.18	0.27	up
DSCR3	chr21:37561409:37562294:-@chr21:37560963:37561018:-@chr21:37555042:37556108:-	0.28	0.33	0.27	0.1	0.09	0.14	0.11	0.293333	0.14	0.33	0.09	0.27	up
EI24	chr11:124944323:124944679:+@chr11:124945210:124945296:+@chr11:124947564:124947675:+	0.2	0.21	0.18	0.27	0.36	0.33	0.32	0.196667	0.36	0.21	0.27	0.18	down
EIF1AD	chr11:65526087:65526212:-@chr11:65524453|65524528:65524350:-	0.46	0.58	0.46	0.62	0.6	0.61	0.61	0.5	0.62	0.58	0.6	0.46	down
EIF2B5	chr3:185537793:185537853:+@chr3:185538869:185539011:+@chr3:185542206:185542299:+	0.34	0.21	0.19	0.38	0.4	0.43	0.403333	0.246667	0.43	0.34	0.38	0.19	down
EIF2B5	chr3:185380651:185380733:+@chr3:185381127:185381132:+@chr3:185381331:185381466:+	0.31	0.31	0.26	0.44	0.4	0.38	0.406667	0.293333	0.44	0.31	0.38	0.26	down
EIF2B5	chr3:185387879:185388243|185387925:+@chr3:185388343:185388465:+	0.48	0.66	0.55	0.75	0.77	0.83	0.783333	0.563333	0.83	0.66	0.75	0.48	down
EIF2B5	chr3:185343534:185344047|185343624:+@chr3:185344581:185344706:+	0.7	0.64	0.72	0.84	0.89	0.75	0.826667	0.686667	0.89	0.72	0.75	0.64	down
EIF2B5	chr3:185379339:185379604:+@chr3:185380660:185380733:+@chr3:185381331:185381466:+	0.78	0.81	0.82	0.72	0.72	0.65	0.696667	0.803333	0.72	0.82	0.65	0.78	up
EIF4A2	chr3:187988264:187988365:+@chr3:187988793:187988903:+@chr3:187989608:187990761:+	0.41	0.4	0.42	0.8	0.74	0.77	0.77	0.41	0.8	0.42	0.74	0.4	down
EIF4A2	chr3:187984915:187985179:+@chr3:187985519:187985584:+@chr3:187986366:187987128:+	0.79	0.81	0.82	0.66	0.61	0.71	0.66	0.806667	0.71	0.82	0.61	0.79	up
EIF4A2	chr3:187988264:187988365:+@chr3:187988793:187988899:+@chr3:187989608:187990761:+	0.33	0.32	0.35	0.73	0.66	0.66	0.683333	0.333333	0.73	0.35	0.66	0.32	down
EIF4A2	chr3:187984915:187984960:+@chr3:187985049:187985179:+	0.1	0.1	0.14	0.37	0.35	0.38	0.366667	0.113333	0.38	0.14	0.35	0.1	down
EIF4A2	chr3:187987250:187987747:+@chr3:187987891|187987962:187988067:+	0.09	0.09	0.11	0.28	0.37	0.19	0.28	0.0966667	0.37	0.11	0.19	0.09	down
EIF4A2	chr3:187985047:187985179:+@chr3:187986353:187986534:+	0.12	0.14	0.15	0.3	0.23	0.25	0.26	0.136667	0.3	0.15	0.23	0.12	down
EIF4G3	chr1:21168554:21168676:-@chr1:21149188|21149191:21149083:-	0.36	0.42	0.56	0.63	0.62	0.64	0.63	0.446667	0.64	0.56	0.62	0.36	down
ELMOD3	chr2:85435027:85435463:+@chr2:85435710|85437601:85437886:+	0.36	0.62	0.36	0.2	0.3	0.26	0.253333	0.446667	0.3	0.62	0.2	0.36	up
ELMOD3	chr2:85436189:85436350:+@chr2:85437236:85437301:+@chr2:85437601:85438376:+	0.4	0.5	0.41	0.19	0.23	0.24	0.22	0.436667	0.24	0.5	0.19	0.4	up
EPB41	chr1:29264056:29264257:+@chr1:29295254:29295703:+@chr1:29296906:29297034:+	0.05	0.04	0.05	0.19	0.26	0.24	0.23	0.0466667	0.26	0.05	0.19	0.04	down
EPB41L1	chr20:34144001:34144149:+@chr20:34165029:34165135:+@chr20:34225100:34225290:+	0.17	0.11	0.11	0.19	0.18	0.39	0.253333	0.13	0.39	0.17	0.18	0.11	down
ESRP1	chr8:95755712:95755910|95755898:+@chr8:95759607:95759775:+	0.75	0.86	0.88	0.68	0.7	0.7	0.693333	0.83	0.7	0.88	0.68	0.75	up
FAM122B	chrX:133743517:133743613:-@chrX:133733139:133733979:-@chrX:133731262:133733050:-	0.69	0.58	0.67	0.83	0.82	0.74	0.796667	0.646667	0.83	0.69	0.74	0.58	down
FAM193B	chr5:176892050:176892248:-@chr5:176891763:176891807:-@chr5:176891560:176891738:-@chr5:176890889:176891128:-	0.3	0.22	0.24	0.53	0.43	0.37	0.443333	0.253333	0.53	0.3	0.37	0.22	down
FAM193B	chr5:176891807:176891763|176891560:-@chr5:176890889:176891128:-	0.18	0.25	0.27	0.39	0.46	0.31	0.386667	0.233333	0.46	0.27	0.31	0.18	down
FAM21A	chr10:51555823:51555945:+@chr10:51556926:51556988:+@chr10:51557349:51557561:+	0.87	0.83	0.81	0.94	0.97	0.96	0.956667	0.836667	0.97	0.87	0.94	0.81	down
FANCA	chr16:88393141:88393081|88393075:-@chr16:88392265:88392988:-	0.57	0.6	0.5	0.88	0.84	0.65	0.79	0.556667	0.88	0.6	0.65	0.5	down
FBXL12	chr19:9790221:9790765:-@chr19:9785814:9786018:-@chr19:9784907:9784950:-@chr19:9781943:9783393:-	0.08	0.16	0.13	0.21	0.22	0.28	0.236667	0.123333	0.28	0.16	0.21	0.08	down
FBXL12	chr19:9790221:9790765:-@chr19:9786248:9786345:-@chr19:9785814:9786018:-@chr19:9781943:9783393:-	0.17	0.34	0.27	0.39	0.45	0.59	0.476667	0.26	0.59	0.34	0.39	0.17	down
FGFR1	chr8:38434031:38434209:-@chr8:38406357:38406623:-@chr8:38405922:38406065:-	0.57	0.74	0.64	0.76	0.79	0.81	0.786667	0.65	0.81	0.74	0.76	0.57	down
FLNA	chrX:153238996:153239185:-@chrX:153238813:153238836:-@chrX:153236387:153236634:-	0.84	0.89	0.87	0.7	0.7	0.75	0.716667	0.866667	0.75	0.89	0.7	0.84	up
FLNB	chr3:58099049:58099296:+@chr3:58102625:58102663:+@chr3:58103417:58103519:+	0.46	0.47	0.62	0.87	0.84	0.93	0.88	0.516667	0.93	0.62	0.84	0.46	down
FLNB	chr3:58099049:58099296:+@chr3:58102625:58102696:+@chr3:58103417:58103519:+	0.57	0.57	0.68	0.92	0.89	0.96	0.923333	0.606667	0.96	0.68	0.89	0.57	down
FN1	chr2:215946290:215946379:-@chr2:215944983|215945343:215944877:-	0.83	0.83	0.79	0.78	0.76	0.57	0.703333	0.816667	0.78	0.83	0.57	0.79	up
FN1	chr2:215967496:215967687:-@chr2:215965899:215966171:-@chr2:215964600:215964782:-	0.45	0.35	0.32	0.15	0.2	0.15	0.166667	0.373333	0.2	0.45	0.15	0.32	up
GALNT4	chr12:88443028:88443495:-@chr12:88414947:88415250:-@chr12:88409844:88410023:-	0.33	0.34	0.31	0.6	0.59	0.47	0.553333	0.326667	0.6	0.34	0.47	0.31	down
GALNT4	chr12:88443028:88443495:-@chr12:88415079:88415250:-@chr12:88409844:88410023:-	0.64	0.58	0.61	0.83	0.7	0.77	0.766667	0.61	0.83	0.64	0.7	0.58	down
GALT	chr9:34636659:34637255:+@chr9:34637386|34637538:34637564:+	0.43	0.29	0.39	0.5	0.49	0.53	0.506667	0.37	0.53	0.43	0.49	0.29	down
GALT	chr9:34636890:34637958:+@chr9:34638045|34638089:34638168:+	0.49	0.44	0.39	0.33	0.28	0.32	0.31	0.44	0.33	0.49	0.28	0.39	up
GEN1	chr2:17798895:17799093:+@chr2:17804677|17804680:17804852:+	0.15	0.63	0.64	0.87	0.72	0.85	0.813333	0.473333	0.87	0.64	0.72	0.15	down
GLCE	chr15:67239964:67240150:+@chr15:67273829:67273918:+@chr15:67275808:67276860:+	0.33	0.45	0.42	0.64	0.47	0.71	0.606667	0.4	0.71	0.45	0.47	0.33	down
GPS1	chr17:77606063:77606140:+@chr17:77606327|77606330:77606387:+	0.84	0.78	0.78	0.91	0.92	0.93	0.92	0.8	0.93	0.84	0.91	0.78	down
GSE1	chr16:84204323:84204505:+@chr16:84225021:84225239:+@chr16:84239659:84239858:+	0.66	0.82	0.71	0.56	0.55	0.51	0.54	0.73	0.56	0.82	0.51	0.66	up
GSN	chr9:123083569:123083661:+@chr9:123084538:123084649:+@chr9:123088701:123088860:+@chr9:123104062:123104266:+	0.08	0.1	0.2	0.51	0.35	0.21	0.356667	0.126667	0.51	0.2	0.21	0.08	down
GSN	chr9:123083569:123083661:+@chr9:123088182:123088284:+@chr9:123099865:123099941:+@chr9:123104062:123104266:+	0.09	0.24	0.18	0.53	0.37	0.49	0.463333	0.17	0.53	0.24	0.37	0.09	down
GSN	chr9:123083569:123083665|123083661:+@chr9:123104062:123104266:+	0.05	0.05	0.05	0.32	0.16	0.47	0.316667	0.05	0.47	0.05	0.16	0.05	down
GSN	chr9:123083569:123083661:+@chr9:123083974:123084052:+@chr9:123104023:123104266:+	0.04	0.05	0.08	0.19	0.15	0.32	0.22	0.0566667	0.32	0.08	0.15	0.04	down
GSN	chr9:123083569:123083661:+@chr9:123088182:123088284:+@chr9:123102164:123102225:+@chr9:123104023:123104266:+	0.11	0.11	0.17	0.44	0.32	0.41	0.39	0.13	0.44	0.17	0.32	0.11	down
GSN	chr9:123083569:123083661:+@chr9:123085418:123085539:+@chr9:123104062:123104266:+	0.01	0.01	0.02	0.19	0.06	0.18	0.143333	0.0133333	0.19	0.02	0.06	0.01	down
GSN	chr9:123083569:123083661:+@chr9:123084538:123084649:+@chr9:123102201:123102225:+@chr9:123104062:123104266:+	0.05	0.11	0.09	0.3	0.25	0.24	0.263333	0.0833333	0.3	0.11	0.24	0.05	down
GSN	chr9:123083569:123083661:+@chr9:123088701:123088860:+@chr9:123099865:123099941:+@chr9:123104062:123104266:+	0.05	0.06	0.18	0.45	0.22	0.32	0.33	0.0966667	0.45	0.18	0.22	0.05	down
GSN	chr9:123083569:123083661:+@chr9:123104070:123104266:+@chr9:123105010:123105164:+	0.95	0.92	0.93	0.78	0.71	0.84	0.776667	0.933333	0.84	0.95	0.71	0.92	up
GSN	chr9:123083569:123083661:+@chr9:123083974:123084052:+@chr9:123102164:123102225:+@chr9:123104023:123104266:+	0.14	0.37	0.21	0.4	0.51	0.44	0.45	0.24	0.51	0.37	0.4	0.14	down
GSN	chr9:123083569:123083661:+@chr9:123099865:123099941:+@chr9:123102201:123102225:+@chr9:123104062:123104266:+	0.08	0.07	0.11	0.41	0.26	0.26	0.31	0.0866667	0.41	0.11	0.26	0.07	down
GSN	chr9:123083569:123083661:+@chr9:123083974:123084052:+@chr9:123102201:123102225:+@chr9:123104062:123104266:+	0.05	0.11	0.22	0.36	0.27	0.35	0.326667	0.126667	0.36	0.22	0.27	0.05	down
GSN	chr9:123083569:123083661:+@chr9:123102201:123102225:+@chr9:123104023:123104266:+	0.13	0.24	0.19	0.41	0.38	0.42	0.403333	0.186667	0.42	0.24	0.38	0.13	down
GSN	chr9:123083569:123083661:+@chr9:123102164:123102225:+@chr9:123104023:123104266:+	0.08	0.06	0.1	0.25	0.23	0.26	0.246667	0.08	0.26	0.1	0.23	0.06	down
GSN	chr9:123083569:123083661:+@chr9:123083974:123084052:+@chr9:123084538:123084649:+@chr9:123104062:123104266:+	0.13	0.26	0.09	0.38	0.35	0.31	0.346667	0.16	0.38	0.26	0.31	0.09	down
GSN	chr9:123083569:123083661:+@chr9:123083974:123084052:+@chr9:123088701:123088860:+@chr9:123104062:123104266:+	0.06	0.07	0.15	0.52	0.26	0.26	0.346667	0.0933333	0.52	0.15	0.26	0.06	down
GSN	chr9:123083569:123083661:+@chr9:123102155:123102225:+@chr9:123104023:123104266:+	0.08	0.07	0.15	0.44	0.18	0.35	0.323333	0.1	0.44	0.15	0.18	0.07	down
GSN	chr9:123083569:123083661:+@chr9:123088182:123088284:+@chr9:123102201:123102225:+@chr9:123104062:123104266:+	0.04	0.04	0.08	0.32	0.22	0.2	0.246667	0.0533333	0.32	0.08	0.2	0.04	down
GSN	chr9:123083569:123083661:+@chr9:123088701:123088860:+@chr9:123102201:123102225:+@chr9:123104062:123104266:+	0.03	0.03	0.09	0.26	0.12	0.17	0.183333	0.05	0.26	0.09	0.12	0.03	down
GSN	chr9:123083569:123083661:+@chr9:123088701:123088860:+@chr9:123104062:123104266:+	0.01	0.01	0.02	0.22	0.05	0.18	0.15	0.0133333	0.22	0.02	0.05	0.01	down
GSN	chr9:123083569:123083661:+@chr9:123083974:123084052:+@chr9:123088182:123088284:+@chr9:123104062:123104266:+	0.1	0.19	0.16	0.44	0.36	0.35	0.383333	0.15	0.44	0.19	0.35	0.1	down
GSN	chr9:123083569:123083661:+@chr9:123104062:123104266:+@chr9:123105010:123105164:+	0.96	0.94	0.94	0.8	0.78	0.85	0.81	0.946667	0.85	0.96	0.78	0.94	up
GSN	chr9:123083569:123083661:+@chr9:123083974:123084052:+@chr9:123084538:123084649:+@chr9:123104070:123104266:+	0.06	0.23	0.2	0.55	0.46	0.33	0.446667	0.163333	0.55	0.23	0.33	0.06	down
GTPBP3	chr19:17308496:17309473:+@chr19:17309683|17309708:17310064:+	0.3	0.62	0.71	0.21	0.26	0.12	0.196667	0.543333	0.26	0.71	0.12	0.3	up
HNRNPC	chr14:20807297:20807478:-@chr14:20801619:20801828:-@chr14:20800903:20801335:-	0.52	0.5	0.53	0.38	0.32	0.33	0.343333	0.516667	0.38	0.53	0.32	0.5	up
HNRNPC	chr14:20801619:20801828:-@chr14:20801310:20801335:-	0.62	0.55	0.62	0.79	0.73	0.66	0.726667	0.596667	0.79	0.62	0.66	0.55	down
HNRNPC	chr14:20807297:20807478:-@chr14:20801666:20801828:-@chr14:20800903:20801335:-	0.51	0.48	0.51	0.37	0.32	0.32	0.336667	0.5	0.37	0.51	0.32	0.48	up
IFT20	chr17:23686493:23686641:-@chr17:23683299:23683535:-@chr17:23681482:23683140:-	0.72	0.64	0.7	0.79	0.79	0.82	0.8	0.686667	0.82	0.72	0.79	0.64	down
INF2	chr14:104251585:104252238:+@chr14:104252666:104252722:+@chr14:104256177:104256994:+	0.53	0.75	0.74	0.92	0.94	0.88	0.913333	0.673333	0.94	0.75	0.88	0.53	down
IP6K2	chr3:48707527:48708024:-@chr3:48707244|48707278:48707131:-	0.31	0.19	0.38	0.77	0.55	0.45	0.59	0.293333	0.77	0.38	0.45	0.19	down
IRAK4	chr12:42448173:42448342:+@chr12:42451290:42451435:+@chr12:42452250:42452432:+	0.59	0.65	0.55	0.48	0.4	0.44	0.44	0.596667	0.48	0.65	0.4	0.55	up
ITGA6	chr2:173070949:173071074:+@chr2:173074746:173074875:+@chr2:173077065:173079433:+	0.28	0.35	0.26	0.47	0.58	0.62	0.556667	0.296667	0.62	0.35	0.47	0.26	down
ITGB3BP	chr1:63746787:63746829:-@chr1:63695393:63696632:-@chr1:63693149:63693227:-	0.12	0.46	0.4	0.49	0.54	0.49	0.506667	0.326667	0.54	0.46	0.49	0.12	down
KCTD20	chr6:36545807:36546012:+@chr6:36550676:36550817:+@chr6:36554876:36555100:+	0.61	0.62	0.77	0.78	0.86	0.86	0.833333	0.666667	0.86	0.77	0.78	0.61	down
KIAA0753	chr17:6468799:6468905:-@chr17:6467651:6468050:-@chr17:6467553:6467615:-@chr17:6466926:6467141:-	0.23	0.16	0.43	0.13	0.08	0.09	0.1	0.273333	0.13	0.43	0.08	0.16	up
KIAA0895L	chr16:65773101:65773010|65772994:-@chr16:65771445:65772070:-	0.26	0.25	0.16	0.1	0.12	0.08	0.1	0.223333	0.12	0.26	0.08	0.16	up
KIAA0907	chr1:154165711:154165790:-@chr1:154163519:154163571:-@chr1:154161460:154162258:-	0.62	0.55	0.69	0.77	0.77	0.71	0.75	0.62	0.77	0.69	0.71	0.55	down
KIF13A	chr6:17902459:17902605:-@chr6:17898082:17898120:-@chr6:17895986:17896085:-	0.85	0.83	0.57	0.56	0.45	0.38	0.463333	0.75	0.56	0.85	0.38	0.57	up
LARGE2	chr11:45902724:45903016:+@chr11:45904166|45904349:45904474:+	0.92	0.92	0.92	0.81	0.72	0.86	0.796667	0.92	0.86	0.92	0.72	0.92	up
LOC102724229	chr7:102093760:102093846:-@chr7:102071482:102071552:-@chr7:102068295:102068456:-	0.06	0.14	0.1	0.16	0.26	0.19	0.203333	0.1	0.26	0.14	0.16	0.06	down
LOC102724993	chr16:16350055:16350090:+@chr16:16350587:16350656:+@chr16:16351450:16351966:+	0.56	0.58	0.76	0.88	0.77	0.84	0.83	0.633333	0.88	0.76	0.77	0.56	down
LOC102724993	chr16:16350055:16350090:+@chr16:16351269:16351371:+@chr16:16351450:16351966:+	0.12	0.14	0.13	0.24	0.15	0.32	0.236667	0.13	0.32	0.14	0.15	0.12	down
LOC400927-CSNK1E	chr22:37024737:37025155:-@chr22:37021339:37021399:-@chr22:37017891:37020486:-	0.06	0.05	0.06	0.22	0.17	0.24	0.21	0.0566667	0.24	0.06	0.17	0.05	down
LRRC14	chr8:145714171:145714233:+@chr8:145714941:145715007:+@chr8:145715807:145716246:+	0.07	0.08	0.12	0.17	0.33	0.41	0.303333	0.09	0.41	0.12	0.17	0.07	down
LSR	chr19:40441688:40441807:+@chr19:40445239:40445435:+@chr19:40449102:40449275:+	0.59	0.71	0.61	0.37	0.34	0.39	0.366667	0.636667	0.39	0.71	0.34	0.59	up
LSR	chr19:40441688:40441807:+@chr19:40445289:40445435:+@chr19:40449102:40449275:+	0.75	0.82	0.75	0.53	0.51	0.55	0.53	0.773333	0.55	0.82	0.51	0.75	up
LSR	chr19:40441688:40441807:+@chr19:40445289:40445439:+@chr19:40449102:40449275:+	0.63	0.72	0.62	0.37	0.36	0.42	0.383333	0.656667	0.42	0.72	0.36	0.62	up
LYRM1	chr16:20821309:20821540:+@chr16:20830006:20830087:+@chr16:20834379:20834885:+	0.41	0.21	0.46	0.1	0.17	0.05	0.106667	0.36	0.17	0.46	0.05	0.21	up
LZTR1	chr22:19672299:19672407:+@chr22:19673078:19673165:+@chr22:19673914:19673971:+	0.69	0.59	0.65	0.81	0.72	0.8	0.776667	0.643333	0.81	0.69	0.72	0.59	down
MAN2C1	chr15:73436187:73436296:-@chr15:73436000:73436079:-	0.49	0.46	0.42	0.29	0.38	0.19	0.286667	0.456667	0.38	0.49	0.19	0.42	up
MARS	chr12:56169317:56169395:+@chr12:56169478:56169608:+	0.61	0.61	0.73	0.38	0.42	0.51	0.436667	0.65	0.51	0.73	0.38	0.61	up
MBP	chr18:72857776:72858233:-@chr18:72829821:72829856:-@chr18:72829439:72829464:-@chr18:72819771:72821415:-	0.32	0.3	0.38	0.41	0.47	0.62	0.5	0.333333	0.62	0.38	0.41	0.3	down
MINK1	chr17:4736220:4736305:+@chr17:4736473:4736583:+@chr17:4736727:4736839:+	0.74	0.8	0.85	0.94	0.95	0.88	0.923333	0.796667	0.95	0.85	0.88	0.74	down
MINK1	chr17:4734299:4734385:+@chr17:4734594:4734812:+	0.22	0.44	0.22	0.14	0.18	0.14	0.153333	0.293333	0.18	0.44	0.14	0.22	up
MIR1248	chr3:187988264:187988365:+@chr3:187988793:187988899:+@chr3:187989608:187990761:+	0.33	0.32	0.35	0.73	0.66	0.66	0.683333	0.333333	0.73	0.35	0.66	0.32	down
MIR1248	chr3:187985047:187985179:+@chr3:187986353:187986534:+	0.12	0.14	0.15	0.3	0.23	0.25	0.26	0.136667	0.3	0.15	0.23	0.12	down
MIR1248	chr3:187984915:187984960:+@chr3:187985049:187985179:+	0.1	0.1	0.14	0.37	0.35	0.38	0.366667	0.113333	0.38	0.14	0.35	0.1	down
MIR1248	chr3:187984915:187985179:+@chr3:187985519:187985584:+@chr3:187986366:187987128:+	0.79	0.81	0.82	0.66	0.61	0.71	0.66	0.806667	0.71	0.82	0.61	0.79	up
MIR1248	chr3:187987250:187987747:+@chr3:187987891|187987962:187988067:+	0.09	0.09	0.11	0.28	0.37	0.19	0.28	0.0966667	0.37	0.11	0.19	0.09	down
MIR1248	chr3:187988264:187988365:+@chr3:187988793:187988903:+@chr3:187989608:187990761:+	0.41	0.4	0.42	0.8	0.74	0.77	0.77	0.41	0.8	0.42	0.74	0.4	down
MIR15A	chr13:49521721:49521828:-@chr13:49517255:49517369:-@chr13:49515270:49516905:-	0.4	0.16	0.15	0.08	0.09	0.06	0.0766667	0.236667	0.09	0.4	0.06	0.15	up
MIR16-1	chr13:49521721:49521828:-@chr13:49517255:49517369:-@chr13:49515270:49516905:-	0.4	0.16	0.15	0.08	0.09	0.06	0.0766667	0.236667	0.09	0.4	0.06	0.15	up
MIR616	chr12:56197756:56200612:-@chr12:56197509|56197569:56197319:-	0.75	0.67	0.46	0.89	0.77	0.89	0.85	0.626667	0.89	0.75	0.77	0.46	down
MIR631	chr15:73436187:73436296:-@chr15:73436000:73436079:-	0.49	0.46	0.42	0.29	0.38	0.19	0.286667	0.456667	0.38	0.49	0.19	0.42	up
MIR6758	chr12:56169317:56169395:+@chr12:56169478:56169608:+	0.61	0.61	0.73	0.38	0.42	0.51	0.436667	0.65	0.51	0.73	0.38	0.61	up
MIR6838	chr7:44080522:44080654:-@chr7:44080255:44080350:-	0.67	0.77	0.65	0.63	0.34	0.48	0.483333	0.696667	0.63	0.77	0.34	0.65	up
MIR6838	chr7:44080522:44080654:-@chr7:44080255:44080371:-	0.75	0.77	0.73	0.66	0.44	0.65	0.583333	0.75	0.66	0.77	0.44	0.73	up
MIR937	chr8:144962767:144963183:-@chr8:144961710:144961772:-@chr8:144961082:144961171:-	0.73	0.74	0.71	0.33	0.21	0.2	0.246667	0.726667	0.33	0.74	0.2	0.71	up
MLPH	chr2:238098983:238099187:+@chr2:238100759:238100898:+@chr2:238107946:238108029:+	0.96	0.92	0.91	0.7	0.86	0.53	0.696667	0.93	0.86	0.96	0.53	0.91	up
MLPH	chr2:238100711:238100898:+@chr2:238107946:238108029:+@chr2:238113730:238113915:+	0.53	0.66	0.57	0.31	0.31	0.28	0.3	0.586667	0.31	0.66	0.28	0.53	up
MLPH	chr2:238113662:238113915:+@chr2:238114184:238114339:+@chr2:238115949:238116041:+	0.87	0.88	0.93	0.78	0.81	0.76	0.783333	0.893333	0.81	0.93	0.76	0.87	up
MLPH	chr2:238098983:238099187:+@chr2:238100711:238100898:+@chr2:238107946:238108029:+	0.61	0.46	0.45	0.24	0.27	0.18	0.23	0.506667	0.27	0.61	0.18	0.45	up
MORF4L2	chrX:102826265:102826327:-@chrX:102820204|102820235:102820083:-	0.67	0.9	0.91	0.93	0.93	0.93	0.93	0.826667	0.93	0.91	0.93	0.67	down
MPDU1	chr17:7429988:7430120:+@chr17:7430748:7430819:+@chr17:7431203:7431313:+	0.38	0.3	0.42	0.63	0.52	0.63	0.593333	0.366667	0.63	0.42	0.52	0.3	down
MPDU1	chr17:7430734:7430880:+@chr17:7431203:7431313:+	0.38	0.3	0.25	0.2	0.17	0.24	0.203333	0.31	0.24	0.38	0.17	0.25	up
MPDU1	chr17:7429988:7430120:+@chr17:7430698:7430819:+@chr17:7431203:7431313:+	0.7	0.67	0.69	0.79	0.76	0.81	0.786667	0.686667	0.81	0.7	0.76	0.67	down
MPPE1	chr18:11896202:11896308:-@chr18:11895911:11895952:-@chr18:11887525:11887619:-@chr18:11886983:11887355:-	0.87	0.9	0.64	0.62	0.59	0.57	0.593333	0.803333	0.62	0.9	0.57	0.64	up
MPPE1	chr18:11876916:11877024:-@chr18:11875675:11875815:-	0.48	0.43	0.55	0.31	0.37	0.25	0.31	0.486667	0.37	0.55	0.25	0.43	up
MSLN	chr16:658657:658700:+@chr16:659554:660176:+	0.5	0.62	0.62	0.37	0.31	0.44	0.373333	0.58	0.44	0.62	0.31	0.5	up
MSLN	chr16:643747:643804:+@chr16:645030:645148:+	0.16	0.13	0.18	0.23	0.39	0.19	0.27	0.156667	0.39	0.18	0.19	0.13	down
MTG2	chr20:60199681:60202075:+@chr20:60202667:60202855:+@chr20:60203328:60203464:+@chr20:60204253:60205210:+	0.2	0.09	0.15	0.37	0.27	0.53	0.39	0.146667	0.53	0.2	0.27	0.09	down
MTMR3	chr22:29136585:29136668:+@chr22:29141748|29141937:29142076:+	0.8	0.78	0.75	0.54	0.71	0.61	0.62	0.776667	0.71	0.8	0.54	0.75	up
NDEL1	chr17:8304052:8304203:+@chr17:8307363:8307397:+@chr17:8310973:8312212:+	0.04	0.11	0.08	0.15	0.22	0.21	0.193333	0.0766667	0.22	0.11	0.15	0.04	down
NEIL1	chr15:73426344:73426867:+@chr15:73427229:73427393:+@chr15:73428278:73429055:+	0.8	0.81	0.67	0.66	0.46	0.21	0.443333	0.76	0.66	0.81	0.21	0.67	up
NF2	chr22:28407428:28407590:+@chr22:28409009:28409068:+@chr22:28420741:28424593:+	0.26	0.22	0.16	0.47	0.5	0.36	0.443333	0.213333	0.5	0.26	0.36	0.16	down
NF2	chr22:28407428:28407590:+@chr22:28409009:28409053:+@chr22:28420741:28424593:+	0.49	0.52	0.35	0.8	0.84	0.81	0.816667	0.453333	0.84	0.52	0.8	0.35	down
NFIA	chr1:61644822:61644987:+@chr1:61664725:61664816:+@chr1:61693563:61696544:+	0.6	0.72	0.68	0.79	0.76	0.75	0.766667	0.666667	0.79	0.72	0.75	0.6	down
NGRN	chr15:88609899:88610112:+@chr15:88610524|88610602:88610634:+	0.43	0.4	0.48	0.36	0.31	0.31	0.326667	0.436667	0.36	0.48	0.31	0.4	up
NPIPA2	chr16:16350055:16350090:+@chr16:16350587:16350656:+@chr16:16351450:16351966:+	0.56	0.58	0.76	0.88	0.77	0.84	0.83	0.633333	0.88	0.76	0.77	0.56	down
NPIPA2	chr16:16350055:16350090:+@chr16:16351269:16351371:+@chr16:16351450:16351966:+	0.12	0.14	0.13	0.24	0.15	0.32	0.236667	0.13	0.32	0.14	0.15	0.12	down
NPIPA3	chr16:16350055:16350090:+@chr16:16351269:16351371:+@chr16:16351450:16351966:+	0.12	0.14	0.13	0.24	0.15	0.32	0.236667	0.13	0.32	0.14	0.15	0.12	down
NPIPA3	chr16:16350055:16350090:+@chr16:16350587:16350656:+@chr16:16351450:16351966:+	0.56	0.58	0.76	0.88	0.77	0.84	0.83	0.633333	0.88	0.76	0.77	0.56	down
NPIPA5	chr16:16350055:16350090:+@chr16:16351269:16351371:+@chr16:16351450:16351966:+	0.12	0.14	0.13	0.24	0.15	0.32	0.236667	0.13	0.32	0.14	0.15	0.12	down
NPIPA5	chr16:16350055:16350090:+@chr16:16350587:16350656:+@chr16:16351450:16351966:+	0.56	0.58	0.76	0.88	0.77	0.84	0.83	0.633333	0.88	0.76	0.77	0.56	down
NPIPA7	chr16:16350055:16350090:+@chr16:16350587:16350656:+@chr16:16351450:16351966:+	0.56	0.58	0.76	0.88	0.77	0.84	0.83	0.633333	0.88	0.76	0.77	0.56	down
NPIPA7	chr16:16350055:16350090:+@chr16:16351269:16351371:+@chr16:16351450:16351966:+	0.12	0.14	0.13	0.24	0.15	0.32	0.236667	0.13	0.32	0.14	0.15	0.12	down
NPIPA8	chr16:16350055:16350090:+@chr16:16350587:16350656:+@chr16:16351450:16351966:+	0.56	0.58	0.76	0.88	0.77	0.84	0.83	0.633333	0.88	0.76	0.77	0.56	down
NPIPA8	chr16:16350055:16350090:+@chr16:16351269:16351371:+@chr16:16351450:16351966:+	0.12	0.14	0.13	0.24	0.15	0.32	0.236667	0.13	0.32	0.14	0.15	0.12	down
NSUN5P1	chr7:74882334:74882448:+@chr7:74882806|74883195:74883405:+	0.76	0.55	0.6	0.86	0.85	0.88	0.863333	0.636667	0.88	0.76	0.85	0.55	down
NSUN5P1	chr7:74880003:74880146:+@chr7:74881854:74882012:+@chr7:74882099:74882237:+	0.49	0.76	0.34	0.29	0.31	0.22	0.273333	0.53	0.31	0.76	0.22	0.34	up
NSUN5P1	chr7:72058321:72058436:-@chr7:72057577|72057966:72057367:-	0.74	0.62	0.63	0.81	0.76	0.82	0.796667	0.663333	0.82	0.74	0.76	0.62	down
NSUN5P1	chr7:74882334:74882448:+@chr7:74882806:74882984:+@chr7:74883195:74883472:+	0.92	0.76	0.83	0.95	0.94	0.93	0.94	0.836667	0.95	0.92	0.93	0.76	down
NSUN5P1	chr7:74882334:74882448:+@chr7:74882806:74882992:+@chr7:74883195:74883472:+	0.87	0.77	0.84	0.93	0.93	0.92	0.926667	0.826667	0.93	0.87	0.92	0.77	down
NSUN5P2	chr7:72058321:72058436:-@chr7:72057577|72057966:72057367:-	0.74	0.62	0.63	0.81	0.76	0.82	0.796667	0.663333	0.82	0.74	0.76	0.62	down
NUDT13	chr10:74554764:74555007:+@chr10:74555162:74555273:+@chr10:74556437:74556591:+	0.71	0.43	0.49	0.15	0.29	0.37	0.27	0.543333	0.37	0.71	0.15	0.43	up
NUDT13	chr10:74554764:74555007:+@chr10:74556437:74556591:+@chr10:74560467:74561618:+	0.67	0.64	0.57	0.87	0.83	0.77	0.823333	0.626667	0.87	0.67	0.77	0.57	down
PDLIM7	chr5:176850195:176850200:-@chr5:176849378:176849439:-	0.54	0.63	0.55	0.35	0.32	0.47	0.38	0.573333	0.47	0.63	0.32	0.54	up
PHKG2	chr16:30669928:30670103:+@chr16:30670371:30670425:+	0.29	0.31	0.28	0.2	0.15	0.15	0.166667	0.293333	0.2	0.31	0.15	0.28	up
PHKG2	chr16:30669928:30670425|30670081:+@chr16:30672054:30672119:+	0.82	0.86	0.81	0.61	0.72	0.72	0.683333	0.83	0.72	0.86	0.61	0.81	up
PHKG2	chr16:30672216:30672379:+@chr16:30675189|30675412:30675537:+	0.65	0.75	0.82	0.84	0.83	0.9	0.856667	0.74	0.9	0.82	0.83	0.65	down
PIGO	chr9:35082540:35082764:-@chr9:35081237:35081288:-	0.67	0.56	0.51	0.68	0.74	0.76	0.726667	0.58	0.76	0.67	0.68	0.51	down
PIGO	chr9:35080463:35080669:-@chr9:35080063:35080281:-@chr9:35079377:35079447:-	0.87	0.89	0.79	0.73	0.71	0.69	0.71	0.85	0.73	0.89	0.69	0.79	up
PNISR	chr6:99970946:99971025:-@chr6:99969169:99969283:-	0.05	0.23	0.17	0.26	0.25	0.51	0.34	0.15	0.51	0.23	0.25	0.05	down
POC1B	chr12:88443028:88443495:-@chr12:88415079:88415250:-@chr12:88409844:88410023:-	0.64	0.58	0.61	0.83	0.7	0.77	0.766667	0.61	0.83	0.64	0.7	0.58	down
POC1B	chr12:88443028:88443495:-@chr12:88414947:88415250:-@chr12:88409844:88410023:-	0.33	0.34	0.31	0.6	0.59	0.47	0.553333	0.326667	0.6	0.34	0.47	0.31	down
POC1B-GALNT4	chr12:88443028:88443495:-@chr12:88414947:88415250:-@chr12:88409844:88410023:-	0.33	0.34	0.31	0.6	0.59	0.47	0.553333	0.326667	0.6	0.34	0.47	0.31	down
POC1B-GALNT4	chr12:88443028:88443495:-@chr12:88415079:88415250:-@chr12:88409844:88410023:-	0.64	0.58	0.61	0.83	0.7	0.77	0.766667	0.61	0.83	0.64	0.7	0.58	down
POLB	chr8:42315129:42315360:+@chr8:42315687:42315744:+@chr8:42321628:42321694:+	0.64	0.45	0.58	0.33	0.44	0.44	0.403333	0.556667	0.44	0.64	0.33	0.45	up
POLM	chr7:44080522:44080654:-@chr7:44080255:44080371:-	0.75	0.77	0.73	0.66	0.44	0.65	0.583333	0.75	0.66	0.77	0.44	0.73	up
POLM	chr7:44080522:44080654:-@chr7:44080255:44080350:-	0.67	0.77	0.65	0.63	0.34	0.48	0.483333	0.696667	0.63	0.77	0.34	0.65	up
POLR2J2	chr7:101994550:101995737:-@chr7:101994135:101994289:-@chr7:101972158:101972228:-	0.53	0.37	0.28	0.27	0.1	0.24	0.203333	0.393333	0.27	0.53	0.1	0.28	up
POLR2J2	chr7:102093760:102093846:-@chr7:102071482:102071552:-@chr7:102068295:102068456:-	0.06	0.14	0.1	0.16	0.26	0.19	0.203333	0.1	0.26	0.14	0.16	0.06	down
POLR2J2	chr7:102000024:102000173:-@chr7:101997388:101997477:-@chr7:101993841:101995737:-	0.87	0.62	0.58	0.53	0.56	0.49	0.526667	0.69	0.56	0.87	0.49	0.58	up
POLR2J3	chr7:102000024:102000173:-@chr7:101997388:101997477:-@chr7:101993841:101995737:-	0.87	0.62	0.58	0.53	0.56	0.49	0.526667	0.69	0.56	0.87	0.49	0.58	up
POLR2J3	chr7:101994550:101995737:-@chr7:101994135:101994289:-@chr7:101972158:101972228:-	0.53	0.37	0.28	0.27	0.1	0.24	0.203333	0.393333	0.27	0.53	0.1	0.28	up
POMT1	chr9:133375111:133375270:+@chr9:133375468:133375623:+	0.21	0.19	0.12	0.3	0.33	0.35	0.326667	0.173333	0.35	0.21	0.3	0.12	down
PORCN	chrX:48252756:48253039:+@chrX:48253116:48253288:+	0.8	0.84	0.86	0.77	0.65	0.69	0.703333	0.833333	0.77	0.86	0.65	0.8	up
PPIL2	chr22:20379226:20379363:+@chr22:20379683:20379785:+	0.16	0.19	0.19	0.06	0.04	0.1	0.0666667	0.18	0.1	0.19	0.04	0.16	up
PPM1K	chr4:89424582:89424945:-@chr4:89418712:89418818:-@chr4:89415101:89417419:-	0.76	0.63	0.41	0.78	0.86	0.77	0.803333	0.6	0.86	0.76	0.77	0.41	down
PSMA3-AS1	chr14:57834426:57834610:-@chr14:57830237:57832282:-@chr14:57829785:57830015:-@chr14:57828106:57828178:-	0.32	0.23	0.25	0.14	0.14	0.13	0.136667	0.266667	0.14	0.32	0.13	0.23	up
PSPH	chr7:56086325:56086790:-@chr7:56069290|56069293:56069148:-	0.47	0.39	0.47	0.58	0.54	0.55	0.556667	0.443333	0.58	0.47	0.54	0.39	down
PSPH	chr7:56086325:56086790:-@chr7:56077578:56077830:-@chr7:56069148:56069341:-	0.51	0.36	0.49	0.22	0.25	0.34	0.27	0.453333	0.34	0.51	0.22	0.36	up
PSPH	chr7:56069148:56069656:-@chr7:56067116:56067164:-@chr7:56056260:56056418:-	0.9	0.81	0.67	0.92	0.93	0.94	0.93	0.793333	0.94	0.9	0.92	0.67	down
PSPH	chr7:56056260:56056418:-@chr7:56054787:56054995:-@chr7:56052399:56052566:-	0.62	0.47	0.5	0.73	0.65	0.76	0.713333	0.53	0.76	0.62	0.65	0.47	down
PSPH	chr7:56086325:56086790:-@chr7:56069148:56069341:-@chr7:56067116:56067164:-	0.61	0.88	0.71	0.95	0.95	0.94	0.946667	0.733333	0.95	0.88	0.94	0.61	down
PSPH	chr7:56067241:56067177|56067116:-@chr7:56056260:56056418:-	0.92	0.89	0.62	0.98	0.98	0.96	0.973333	0.81	0.98	0.92	0.96	0.62	down
PTGR1	chr9:113372192:113372310:-@chr9:113366258:113366363:-@chr9:113364675:113365332:-	0.08	0.19	0.19	0.27	0.24	0.26	0.256667	0.153333	0.27	0.19	0.24	0.08	down
PTGR2	chr14:73410479:73410670:+@chr14:73413454:73413624:+@chr14:73416511:73416632:+	0.72	0.69	0.74	0.76	0.88	0.87	0.836667	0.716667	0.88	0.74	0.76	0.69	down
PXK	chr3:58370857:58370926:+@chr3:58373668:58373730:+@chr3:58385519:58386787:+	0.78	0.58	0.73	0.8	0.86	0.81	0.823333	0.696667	0.86	0.78	0.8	0.58	down
QTRT1	chr19:10673626:10673930:+@chr19:10674924:10675015:+@chr19:10678386:10678501:+@chr19:10678978:10679056:+	0.4	0.46	0.22	0.78	0.57	0.69	0.68	0.36	0.78	0.46	0.57	0.22	down
RASA4	chr7:102093760:102093846:-@chr7:102071482:102071552:-@chr7:102068295:102068456:-	0.06	0.14	0.1	0.16	0.26	0.19	0.203333	0.1	0.26	0.14	0.16	0.06	down
RELL2	chr5:140999671:141000046:+@chr5:141000163:141000196:+@chr5:141000422:141001042:+	0.88	0.81	0.67	0.94	0.91	0.91	0.92	0.786667	0.94	0.88	0.91	0.67	down
REPS1	chr6:139292807:139292928:-@chr6:139289231:139289308:-@chr6:139283867:139283954:-	0.12	0.28	0.29	0.53	0.6	0.6	0.576667	0.23	0.6	0.29	0.53	0.12	down
REPS1	chr6:139292807:139292928:-@chr6:139289231:139289311:-@chr6:139283867:139283954:-	0.4	0.54	0.45	0.73	0.78	0.83	0.78	0.463333	0.83	0.54	0.73	0.4	down
REPS1	chr6:139292807:139292928:-@chr6:139289227:139289311:-@chr6:139283867:139283954:-	0.28	0.4	0.24	0.62	0.58	0.71	0.636667	0.306667	0.71	0.4	0.58	0.24	down
RNH1	chr11:496609:497112:-@chr11:494824:494972:-@chr11:492062:492249:-	0.5	0.56	0.59	0.72	0.72	0.6	0.68	0.55	0.72	0.59	0.6	0.5	down
RNH1	chr11:497113:497300:-@chr11:494824:494996:-@chr11:492062:492249:-	0.26	0.27	0.26	0.48	0.41	0.38	0.423333	0.263333	0.48	0.27	0.38	0.26	down
RNH1	chr11:497113:497300:-@chr11:494824:495001:-@chr11:492062:492249:-	0.22	0.25	0.24	0.44	0.37	0.34	0.383333	0.236667	0.44	0.25	0.34	0.22	down
RPAIN	chr17:5266813:5266873:+@chr17:5270015|5272115:5272255:+	0.45	0.18	0.24	0.17	0.16	0.11	0.146667	0.29	0.17	0.45	0.11	0.18	up
RPS24	chr10:79466958:79467068:+@chr10:79469968:79469989:+@chr10:79470379:79470511:+	0.19	0.18	0.19	0.07	0.09	0.08	0.08	0.186667	0.09	0.19	0.07	0.18	up
RPS24	chr10:79466958:79467073|79467068:+@chr10:79469968:79469989:+	0.27	0.27	0.24	0.49	0.54	0.52	0.516667	0.26	0.54	0.27	0.49	0.24	down
RPS6KC1	chr1:211310971:211311006:+@chr1:211312835:211312951:+@chr1:211317661:211317781:+	0.28	0.27	0.29	0.2	0.07	0.09	0.12	0.28	0.2	0.29	0.07	0.27	up
RRNAD1	chr1:154968407:154968531:+@chr1:154968697:154968889:+	0.4	0.28	0.41	0.22	0.25	0.16	0.21	0.363333	0.25	0.41	0.16	0.28	up
S100A13	chr1:151867221:151867339:-@chr1:151865633|151866698:151865420:-	0.36	0.35	0.23	0.16	0.15	0.15	0.153333	0.313333	0.16	0.36	0.15	0.23	up
SCRIB	chr8:144962767:144963183:-@chr8:144961710:144961772:-@chr8:144961082:144961171:-	0.73	0.74	0.71	0.33	0.21	0.2	0.246667	0.726667	0.33	0.74	0.2	0.71	up
SDR39U1	chr14:23981392:23981821:-@chr14:23981144:23981306:-@chr14:23979829:23980841:-	0.88	0.74	0.72	0.67	0.65	0.66	0.66	0.78	0.67	0.88	0.65	0.72	up
SDR39U1	chr14:23981392:23981821:-@chr14:23981155:23981306:-@chr14:23979829:23980841:-	0.85	0.74	0.73	0.67	0.63	0.66	0.653333	0.773333	0.67	0.85	0.63	0.73	up
SGK494	chr17:23965232:23965338:-@chr17:23964585:23964830:-@chr17:23955203:23956360:-	0.64	0.41	0.61	0.72	0.66	0.74	0.706667	0.553333	0.74	0.64	0.66	0.41	down
SIRT2	chr19:44081986:44082342:-@chr19:44076451|44076478:44076299:-	0.21	0.13	0.19	0.51	0.3	0.52	0.443333	0.176667	0.52	0.21	0.3	0.13	down
SIRT2	chr19:44081986:44082342:-@chr19:44076347|44076451:44076299:-	0.32	0.29	0.39	0.21	0.23	0.24	0.226667	0.333333	0.24	0.39	0.21	0.29	up
SLC35E2	chr1:1667023:1667540:-@chr1:1665550:1665967:-@chr1:1660535:1661003:-	0.23	0.2	0.21	0.44	0.32	0.25	0.336667	0.213333	0.44	0.23	0.25	0.2	down
SLC37A2	chr11:124460834:124461124:+@chr11:124461310:124461366:+@chr11:124463225:124465854:+	0.42	0.41	0.22	0.51	0.54	0.69	0.58	0.35	0.69	0.42	0.51	0.22	down
SLC3A2	chr11:62380047:62380429:+@chr11:62400832|62400835:62400927:+	0.3	0.28	0.22	0.46	0.34	0.48	0.426667	0.266667	0.48	0.3	0.34	0.22	down
SLK	chr10:105757925:105758104:+@chr10:105760564:105760656:+@chr10:105767908:105768037:+	0.23	0.29	0.27	0.76	0.78	0.84	0.793333	0.263333	0.84	0.29	0.76	0.23	down
SNHG1	chr11:62379181:62379819:-@chr11:62378567:62378599:-@chr11:62377849:62378112:-	0.44	0.42	0.38	0.74	0.68	0.65	0.69	0.413333	0.74	0.44	0.65	0.38	down
SNORD2	chr3:187984915:187985179:+@chr3:187985519:187985584:+@chr3:187986366:187987128:+	0.79	0.81	0.82	0.66	0.61	0.71	0.66	0.806667	0.71	0.82	0.61	0.79	up
SNORD2	chr3:187985047:187985179:+@chr3:187986353:187986534:+	0.12	0.14	0.15	0.3	0.23	0.25	0.26	0.136667	0.3	0.15	0.23	0.12	down
SNORD48	chr6:31910882:31911207:+@chr6:31912169:31912273:+@chr6:31912992:31913191:+	0.27	0.28	0.29	0.58	0.44	0.5	0.506667	0.28	0.58	0.29	0.44	0.27	down
SNORD48	chr6:31910882:31911207:+@chr6:31912180:31912277:+@chr6:31912992:31913191:+	0.18	0.15	0.17	0.28	0.32	0.22	0.273333	0.166667	0.32	0.18	0.22	0.15	down
SNORD48	chr6:31910882:31911207:+@chr6:31912055:31912273:+@chr6:31912992:31913191:+	0.25	0.31	0.28	0.5	0.4	0.39	0.43	0.28	0.5	0.31	0.39	0.25	down
SNORD48	chr6:31910882:31911207:+@chr6:31912051|31912055:31912273:+	0.47	0.49	0.41	0.61	0.67	0.79	0.69	0.456667	0.79	0.49	0.61	0.41	down
SNORD48	chr6:31910882:31911207:+@chr6:31912051:31912273:+@chr6:31912992:31913191:+	0.24	0.31	0.27	0.51	0.41	0.41	0.443333	0.273333	0.51	0.31	0.41	0.24	down
SNORD48	chr6:31910882:31911207:+@chr6:31912055|31912180:31912277:+	0.4	0.63	0.49	0.36	0.38	0.35	0.363333	0.506667	0.38	0.63	0.35	0.4	up
SNORD48	chr6:31910882:31911207:+@chr6:31912055|31912180:31912273:+	0.39	0.65	0.47	0.33	0.38	0.37	0.36	0.503333	0.38	0.65	0.33	0.39	up
SNORD48	chr6:31910882:31911207:+@chr6:31912183:31912273:+@chr6:31912992:31913191:+	0.29	0.27	0.3	0.6	0.45	0.51	0.52	0.286667	0.6	0.3	0.45	0.27	down
SNORD48	chr6:31910882:31911207:+@chr6:31912180:31912273:+@chr6:31912992:31913191:+	0.46	0.41	0.44	0.7	0.63	0.63	0.653333	0.436667	0.7	0.46	0.63	0.41	down
SNORD52	chr6:31910882:31911207:+@chr6:31912180:31912273:+@chr6:31912992:31913191:+	0.46	0.41	0.44	0.7	0.63	0.63	0.653333	0.436667	0.7	0.46	0.63	0.41	down
SNORD52	chr6:31910882:31911207:+@chr6:31912055:31912273:+@chr6:31912992:31913191:+	0.25	0.31	0.28	0.5	0.4	0.39	0.43	0.28	0.5	0.31	0.39	0.25	down
SNORD52	chr6:31910882:31911207:+@chr6:31912183:31912273:+@chr6:31912992:31913191:+	0.29	0.27	0.3	0.6	0.45	0.51	0.52	0.286667	0.6	0.3	0.45	0.27	down
SNORD52	chr6:31910882:31911207:+@chr6:31912051:31912273:+@chr6:31912992:31913191:+	0.24	0.31	0.27	0.51	0.41	0.41	0.443333	0.273333	0.51	0.31	0.41	0.24	down
SNORD52	chr6:31910882:31911207:+@chr6:31912169:31912273:+@chr6:31912992:31913191:+	0.27	0.28	0.29	0.58	0.44	0.5	0.506667	0.28	0.58	0.29	0.44	0.27	down
SNORD52	chr6:31910882:31911207:+@chr6:31912180:31912277:+@chr6:31912992:31913191:+	0.18	0.15	0.17	0.28	0.32	0.22	0.273333	0.166667	0.32	0.18	0.22	0.15	down
SNORD88C	chr19:55999641:56000043:-@chr19:55997523:55997683:-@chr19:55997058:55997326:-	0.37	0.3	0.36	0.47	0.62	0.57	0.553333	0.343333	0.62	0.37	0.47	0.3	down
SPG21	chr15:63068010:63068895:-@chr15:63066563:63066652:-@chr15:63062898:63062984:-	0.34	0.46	0.38	0.12	0.22	0.29	0.21	0.393333	0.29	0.46	0.12	0.34	up
STARD3	chr17:35067752:35068301:+@chr17:35068488:35068599:+@chr17:35068830:35068885:+	0.7	0.45	0.79	0.85	0.9	0.83	0.86	0.646667	0.9	0.79	0.83	0.45	down
STAU1	chr20:47238060:47238421:-@chr20:47215941:47216229:-@chr20:47203877:47204015:-	0.43	0.36	0.34	0.29	0.3	0.21	0.266667	0.376667	0.3	0.43	0.21	0.34	up
SUGP2	chr19:19005298:19005348:-@chr19:19002760:19002891:-@chr19:18996428:18998035:-	0.7	0.61	0.57	0.56	0.47	0.47	0.5	0.626667	0.56	0.7	0.47	0.57	up
TAF6	chr7:99554763:99554956:-@chr7:99554077:99554208:-@chr7:99551405:99551452:-@chr7:99549613:99549827:-	0.32	0.4	0.33	0.6	0.49	0.46	0.516667	0.35	0.6	0.4	0.46	0.32	down
TBC1D14	chr4:7053696:7053879:+@chr4:7059260:7059354:+@chr4:7063281:7063409:+	0.29	0.25	0.49	0.22	0.07	0.18	0.156667	0.343333	0.22	0.49	0.07	0.25	up
TCF12	chr15:55330651:55330913:+@chr15:55331911:55331982:+@chr15:55332752:55332958:+	0.17	0.31	0.3	0.11	0.15	0.15	0.136667	0.26	0.15	0.31	0.11	0.17	up
TCF3	chr19:1566685:1566820:-@chr19:1566284:1566484:-	0.27	0.33	0.33	0.23	0.14	0.22	0.196667	0.31	0.23	0.33	0.14	0.27	up
TCF3	chr19:1566284:1566820:-@chr19:1563206:1563432:-@chr19:1560289:1562848:-	0.48	0.59	0.53	0.69	0.63	0.64	0.653333	0.533333	0.69	0.59	0.63	0.48	down
TCF7L2	chr10:114701154:114701356:+@chr10:114714305:114714373:+@chr10:114789774:114789879:+	0.08	0.1	0.22	0.56	0.54	0.55	0.55	0.133333	0.56	0.22	0.54	0.08	down
TCTN3	chr10:97436242:97436277:-@chr10:97435303:97435383:-@chr10:97434246:97434371:-	0.86	0.72	0.69	0.53	0.67	0.58	0.593333	0.756667	0.67	0.86	0.53	0.69	up
TP53I11	chr11:44929004:44929494:-@chr11:44917241:44917317:-@chr11:44916334:44916493:-	0.72	0.72	0.61	0.3	0.46	0.53	0.43	0.683333	0.53	0.72	0.3	0.61	up
TPGS2	chr18:32662644:32663353:-@chr18:32657764:32657832:-@chr18:32654929:32655090:-@chr18:32652479:32652934:-	0.29	0.31	0.35	0.2	0.28	0.14	0.206667	0.316667	0.28	0.35	0.14	0.29	up
TPRKB	chr2:73815064:73815226:-@chr2:73813335|73813339:73813219:-	0.17	0.24	0.42	0.12	0.11	0.12	0.116667	0.276667	0.12	0.42	0.11	0.17	up
TPRKB	chr2:73815064:73815226:-@chr2:73813316|73813335:73813219:-	0.56	0.46	0.4	0.69	0.8	0.81	0.766667	0.473333	0.81	0.56	0.69	0.4	down
TRAPPC2L	chr16:87452528:87452698:+@chr16:87453254|87453482:87453659:+	0.19	0.2	0.2	0.31	0.34	0.29	0.313333	0.196667	0.34	0.2	0.29	0.19	down
TRIT1	chr1:40121577:40121765:-@chr1:40114321:40114391:-@chr1:40101047:40101194:-@chr1:40095505:40095676:-	0.05	0.09	0.11	0.14	0.2	0.33	0.223333	0.0833333	0.33	0.11	0.14	0.05	down
TSC1	chr9:134776210:134776776:-@chr9:134775897|134775900:134775779:-	0.83	0.74	0.87	0.65	0.69	0.66	0.666667	0.813333	0.69	0.87	0.65	0.74	up
TSC1	chr9:134776321:134776210|134776202:-@chr9:134775727:134775897:-	0.25	0.3	0.21	0.15	0.12	0.18	0.15	0.253333	0.18	0.3	0.12	0.21	up
TTC28-AS1	chr22:26661139:26661218:+@chr22:26666008:26666159:+@chr22:26723399:26724826:+	0.24	0.36	0.2	0.38	0.54	0.54	0.486667	0.266667	0.54	0.36	0.38	0.2	down
TTC28-AS1	chr22:26723399:26724826|26723727:+@chr22:26725418:26728667:+	0.61	0.69	0.91	0.46	0.39	0.52	0.456667	0.736667	0.52	0.91	0.39	0.61	up
UAP1	chr1:160826737:160826925:+@chr1:160829149:160829196:+@chr1:160834206:160834272:+	0.17	0.17	0.16	0.43	0.51	0.44	0.46	0.166667	0.51	0.17	0.43	0.16	down
UAP1	chr1:160826737:160826925:+@chr1:160829146:160829196:+@chr1:160834206:160834272:+	0.41	0.4	0.4	0.75	0.78	0.77	0.766667	0.403333	0.78	0.41	0.75	0.4	down
USO1	chr4:76933867:76934078:+@chr4:76935513:76935533:+@chr4:76939799:76939909:+	0.01	0.01	0.01	0.23	0.17	0.09	0.163333	0.01	0.23	0.01	0.09	0.01	down
VPS28	chr8:145623100:145623170:-@chr8:145622217:145622399:-	0.1	0.09	0.16	0.44	0.24	0.25	0.31	0.116667	0.44	0.16	0.24	0.09	down
WASH2P	chr2:114057560:114058183:+@chr2:114062597:114062750:+@chr2:114069110:114069208:+	0.79	0.85	0.81	0.74	0.76	0.57	0.69	0.816667	0.76	0.85	0.57	0.79	up
WDR90	chr16:643747:643804:+@chr16:645030:645148:+	0.16	0.13	0.18	0.23	0.39	0.19	0.27	0.156667	0.39	0.18	0.19	0.13	down
WSB1	chr17:22658897:22659060:+@chr17:22660253:22660425:+	0.68	0.55	0.55	0.37	0.27	0.2	0.28	0.593333	0.37	0.68	0.2	0.55	up
WSB1	chr17:22657361:22658035:+@chr17:22658897|22660253:22660425:+	0.41	0.41	0.5	0.22	0.19	0.17	0.193333	0.44	0.22	0.5	0.17	0.41	up
WSB1	chr17:22657361:22658035:+@chr17:22658897:22659072:+@chr17:22660253:22660425:+	0.32	0.22	0.4	0.09	0.11	0.03	0.0766667	0.313333	0.11	0.4	0.03	0.22	up
WSB1	chr17:22657361:22658035:+@chr17:22658897:22659060:+@chr17:22660253:22660425:+	0.22	0.25	0.37	0.11	0.09	0.05	0.0833333	0.28	0.11	0.37	0.05	0.22	up
ZCCHC6	chr9:88106011:88106336:-@chr9:88103934:88104007:-@chr9:88103502:88103565:-	0.11	0.14	0.08	0.74	0.55	0.44	0.576667	0.11	0.74	0.14	0.44	0.08	down
ZMYND8	chr20:45283372:45283532:-@chr20:45274694:45274777:-@chr20:45271266:45272949:-	0.54	0.44	0.51	0.68	0.63	0.63	0.646667	0.496667	0.68	0.54	0.63	0.44	down
ZNF146	chr19:41408696:41408863|41408815:+@chr19:41411490:41412441:+	0.4	0.5	0.51	0.78	0.64	0.65	0.69	0.47	0.78	0.51	0.64	0.4	down
ZNF195	chr11:3356844:3357027:-@chr11:3351462|3351481:3351383:-	0.2	0.36	0.2	0.05	0.19	0.16	0.133333	0.253333	0.19	0.36	0.05	0.2	up
ZNF41	chrX:47226802:47227289:-@chrX:47211667:47212103:-@chrX:47200615:47200741:-	0.7	0.65	0.39	0.73	0.84	0.72	0.763333	0.58	0.84	0.7	0.72	0.39	down
ZNF446	chr19:63682822:63682906:+@chr19:63683109:63683198:+	0.34	0.35	0.26	0.39	0.45	0.52	0.453333	0.316667	0.52	0.35	0.39	0.26	down
ZNF680	chr7:63641520:63642031:-@chr7:63639543:63639730:-@chr7:63633632:63633749:-@chr7:63617690:63620313:-	0.11	0.15	0.13	0.28	0.31	0.16	0.25	0.13	0.31	0.15	0.16	0.11	down
ZSCAN26	chr6:28347611:28347691:+@chr6:28348426:28348543:+	0.73	0.5	0.6	0.14	0.37	0.09	0.2	0.61	0.37	0.73	0.09	0.5	up
ZSCAN26	chr6:28347611:28348095|28347691:+@chr6:28348426:28348543:+	0.65	0.52	0.71	0.14	0.43	0.17	0.246667	0.626667	0.43	0.71	0.14	0.52	up

## Sheet: ESRP2_OL_with_SW480
Supplementary File 2. List of alternative splicing targets both in ESRP2 knocking down LNCaP line and SW480 EpCAMhi/lo , filtered by ΔPSI > 0.1
symbol	event_name	psi_LNCaP_LNCap_ESRP2_KD_1	psi_LNCaP_LNCap_ESRP2_KD_2	psi_LNCaP_LNCap_ESRP2_KD_3	psi_LNCaP_LNCap_ESRP2_control_1	psi_LNCaP_LNCap_ESRP2_control_2	psi_LNCaP_LNCap_ESRP2_control_3	psi_mean_group1	psi_mean_group2	psi_max_group1	psi_max_group2	psi_min_group1	psi_min_group2	change_type
ADGRG1	chr16:56211356:56211549:+@chr16:56213104:56213258:+@chr16:56233000:56233121:+@chr16:56241666:56241768:+	0.27	0.22	0.13	0.06	0.12	0.08	0.0866667	0.206667	0.12	0.27	0.06	0.13	up
APLP2	chr11:129497333:129497618:+@chr11:129498717:129498884:+@chr11:129501805:129501935:+	0.47	0.46	0.49	0.65	0.69	0.69	0.676667	0.473333	0.69	0.49	0.65	0.46	down
APOL6	chr22:34382372:34382468|34382443:+@chr22:34384608:34394412:+	0.75	0.79	0.66	0.5	0.57	0.5	0.523333	0.733333	0.57	0.79	0.5	0.66	up
APTX	chr9:32979757:32980089:-@chr9:32977758:32977844:-@chr9:32975969:32976028:-	0.7	0.65	0.64	0.81	0.74	0.84	0.796667	0.663333	0.84	0.7	0.74	0.64	down
ARAP1	chr11:72147223:72147326:-@chr11:72146460:72146577:-@chr11:72144394:72144446:-	0.86	0.93	0.93	0.73	0.78	0.84	0.783333	0.906667	0.84	0.93	0.73	0.86	up
ARHGEF11	chr1:155175964:155176326:-@chr1:155174834:155174929:-@chr1:155173665:155173912:-	0.88	0.81	0.9	0.15	0.12	0.12	0.13	0.863333	0.15	0.9	0.12	0.81	up
ARHGEF11	chr1:155175964:155176326:-@chr1:155174875|155174929:155174834:-	0.91	0.92	0.95	0.17	0.17	0.2	0.18	0.926667	0.2	0.95	0.17	0.91	up
ARHGEF11	chr1:155175964:155176326:-@chr1:155174834:155174875:-@chr1:155173665:155173912:-	0.67	0.43	0.59	0.1	0.07	0.04	0.07	0.563333	0.1	0.67	0.04	0.43	up
ARL16	chr17:77259878:77260110:-@chr17:77259469:77259584:-	0.59	0.74	0.63	0.75	0.79	0.88	0.806667	0.653333	0.88	0.74	0.75	0.59	down
ARSA	chr22:49413240:49413473:-@chr22:49413086|49413106:49412850:-	0.55	0.63	0.54	0.53	0.46	0.26	0.416667	0.573333	0.53	0.63	0.26	0.54	up
BAIAP2	chr17:76696859:76696904:+@chr17:76699309:76699354:+@chr17:76704165:76704620:+	0.42	0.37	0.35	0.67	0.79	0.8	0.753333	0.38	0.8	0.42	0.67	0.35	down
BAIAP2	chr17:76696859:76696904:+@chr17:76699309:76699350:+@chr17:76704165:76704620:+	0.05	0.1	0.06	0.19	0.33	0.18	0.233333	0.07	0.33	0.1	0.18	0.05	down
BMP1	chr8:22110698:22110878:+@chr8:22114576|22115266:22115386:+	0.68	0.65	0.7	0.49	0.39	0.41	0.43	0.676667	0.49	0.7	0.39	0.65	up
C1orf131	chr1:229441226:229441557:-@chr1:229431519:229431575:-@chr1:229429342:229429437:-	0.74	0.49	0.65	0.76	0.88	0.88	0.84	0.626667	0.88	0.74	0.76	0.49	down
CAP2	chr6:17615379:17615522:+@chr6:17622059:17622168:+@chr6:17647479:17647668:+	0.71	0.67	0.66	0.56	0.22	0.24	0.34	0.68	0.56	0.71	0.22	0.66	up
CAP2	chr6:17615379:17615522:+@chr6:17622059:17622164:+@chr6:17647479:17647668:+	0.98	0.96	0.94	0.91	0.78	0.69	0.793333	0.96	0.91	0.98	0.69	0.94	up
CCDC14	chr3:125158277:125158332:-@chr3:125157892:125157964:-	0.34	0.56	0.36	0.67	0.69	0.62	0.66	0.42	0.69	0.56	0.62	0.34	down
CD46	chr1:206006981:206007163:+@chr1:206007747:206007791:+@chr1:206010289:206010330:+	0.74	0.74	0.71	0.58	0.62	0.51	0.57	0.73	0.62	0.74	0.51	0.71	up
CEP41	chr7:129827784:129828226:-@chr7:129827116:129827331:-@chr7:129820848:129826116:-	0.81	0.87	0.79	0.66	0.73	0.77	0.72	0.823333	0.77	0.87	0.66	0.79	up
CHFR	chr12:131964214:131964313:-@chr12:131962083:131962279:-@chr12:131958564:131959053:-	0.06	0.11	0.1	0.28	0.18	0.23	0.23	0.09	0.28	0.11	0.18	0.06	down
CHFR	chr12:131964214:131964313:-@chr12:131962157:131962279:-@chr12:131958564:131959053:-	0.04	0.14	0.11	0.23	0.21	0.2	0.213333	0.0966667	0.23	0.14	0.2	0.04	down
CLEC2D	chr12:9736691:9736794:+@chr12:9736897:9736978:+@chr12:9737688:9737811:+@chr12:9738623:9743418:+	0.23	0.32	0.36	0.44	0.42	0.46	0.44	0.303333	0.46	0.36	0.42	0.23	down
COA1	chr7:43645573:43645805:-@chr7:43637136:43637906:-@chr7:43614580:43615765:-	0.53	0.53	0.49	0.7	0.69	0.59	0.66	0.516667	0.7	0.53	0.59	0.49	down
COA1	chr7:43645573:43645805:-@chr7:43637308:43637906:-@chr7:43614580:43615765:-	0.49	0.54	0.52	0.71	0.64	0.61	0.653333	0.516667	0.71	0.54	0.61	0.49	down
CREBBP	chr16:3768013:3768778:-@chr16:3767615:3767659:-@chr16:3764571:3764695:-	0.63	0.71	0.62	0.84	0.9	0.95	0.896667	0.653333	0.95	0.71	0.84	0.62	down
CTNND1	chr11:57313085:57313203:+@chr11:57315433|57315542:57315721:+	0.91	0.95	0.92	0.77	0.61	0.66	0.68	0.926667	0.77	0.95	0.61	0.91	up
CTNND1	chr11:57285810:57286094:+@chr11:57315433:57315721:+@chr11:57318058:57318129:+	0.58	0.6	0.7	0.12	0.15	0.15	0.14	0.626667	0.15	0.7	0.12	0.58	up
CTNND1	chr11:57285810:57286094:+@chr11:57313085:57313203:+@chr11:57315433:57315721:+	0.62	0.56	0.55	0.24	0.28	0.17	0.23	0.576667	0.28	0.62	0.17	0.55	up
CTNND1	chr11:57285810:57286167:+@chr11:57315433|57315540:57315721:+	0.88	0.91	0.9	0.36	0.31	0.33	0.333333	0.896667	0.36	0.91	0.31	0.88	up
CTNND1	chr11:57285810:57286094:+@chr11:57315542:57315721:+@chr11:57318058:57318129:+	0.42	0.48	0.58	0.1	0.13	0.11	0.113333	0.493333	0.13	0.58	0.1	0.42	up
CTNND1	chr11:57285810:57286094:+@chr11:57315540:57315721:+@chr11:57318058:57318129:+	0.43	0.49	0.58	0.11	0.14	0.12	0.123333	0.5	0.14	0.58	0.11	0.43	up
CTNND1	chr11:57313085:57313203:+@chr11:57315433|57315540:57315721:+	0.92	0.91	0.92	0.73	0.59	0.53	0.616667	0.916667	0.73	0.92	0.53	0.91	up
CTSD	chr11:1739274:1739136|1739111:-@chr11:1737322:1737445:-	0.93	0.92	0.92	0.81	0.82	0.79	0.806667	0.923333	0.82	0.93	0.79	0.92	up
DNASE1	chr16:3632894:3633038:+@chr16:3641319:3641923:+@chr16:3644963:3645046:+	0.42	0.46	0.3	0.69	0.63	0.67	0.663333	0.393333	0.69	0.46	0.63	0.3	down
DNMT3B	chr20:30843299:30844237:+@chr20:30846782|30846876:30847001:+	0.22	0.18	0.18	0.09	0.06	0.05	0.0666667	0.193333	0.09	0.22	0.05	0.18	up
DNMT3B	chr20:30853852:30853937:+@chr20:30857676:30857794:+@chr20:30859229:30860826:+	0.27	0.12	0.13	0.41	0.3	0.29	0.333333	0.173333	0.41	0.27	0.29	0.12	down
DPM1	chr20:48991975:48992144:-@chr20:48990809:48990902:-@chr20:48986092:48986206:-	0.9	0.83	0.75	0.71	0.74	0.72	0.723333	0.826667	0.74	0.9	0.71	0.75	up
DPM1	chr20:48991975:48992144:-@chr20:48991073:48991153:-@chr20:48990809:48990877:-	0.31	0.23	0.22	0.37	0.37	0.4	0.38	0.253333	0.4	0.31	0.37	0.22	down
DPM1	chr20:48991975:48992144:-@chr20:48990809:48990899:-@chr20:48986092:48986206:-	0.93	0.83	0.78	0.72	0.75	0.75	0.74	0.846667	0.75	0.93	0.72	0.78	up
DSCR3	chr21:37561409:37562294:-@chr21:37560963:37561018:-@chr21:37555042:37556108:-	0.28	0.33	0.27	0.1	0.09	0.14	0.11	0.293333	0.14	0.33	0.09	0.27	up
DUT	chr15:46410913:46411284:+@chr15:46411757|46411759:46411895:+	0.76	0.79	0.58	0.9	0.93	0.94	0.923333	0.71	0.94	0.79	0.9	0.58	down
DUXAP10	chr14:18719977:18720126:+@chr14:18722244:18722354:+@chr14:18723625:18723772:+	0.36	0.34	0.32	0.41	0.54	0.47	0.473333	0.34	0.54	0.36	0.41	0.32	down
DUXAP10	chr14:18719977:18720126:+@chr14:18722244:18722308:+@chr14:18723625:18723772:+	0.17	0.12	0.1	0.19	0.32	0.26	0.256667	0.13	0.32	0.17	0.19	0.1	down
ECHDC2	chr1:53146128:53146214:-@chr1:53143294:53143350:-@chr1:53142904:53143093:-	0.63	0.67	0.71	0.53	0.58	0.59	0.566667	0.67	0.59	0.71	0.53	0.63	up
EIF2B5	chr3:185343534:185344047|185343624:+@chr3:185344581:185344706:+	0.7	0.64	0.72	0.84	0.89	0.75	0.826667	0.686667	0.89	0.72	0.75	0.64	down
EIF2B5	chr3:185380651:185380733:+@chr3:185381127:185381132:+@chr3:185381331:185381466:+	0.31	0.31	0.26	0.44	0.4	0.38	0.406667	0.293333	0.44	0.31	0.38	0.26	down
EIF2B5	chr3:185379339:185379604:+@chr3:185380660:185380733:+@chr3:185381331:185381466:+	0.78	0.81	0.82	0.72	0.72	0.65	0.696667	0.803333	0.72	0.82	0.65	0.78	up
EIF2B5	chr3:185387879:185388243|185387925:+@chr3:185388343:185388465:+	0.48	0.66	0.55	0.75	0.77	0.83	0.783333	0.563333	0.83	0.66	0.75	0.48	down
EIF2B5	chr3:185537793:185537853:+@chr3:185538869:185539011:+@chr3:185542206:185542299:+	0.34	0.21	0.19	0.38	0.4	0.43	0.403333	0.246667	0.43	0.34	0.38	0.19	down
EIF4G3	chr1:21168554:21168676:-@chr1:21149188|21149191:21149083:-	0.36	0.42	0.56	0.63	0.62	0.64	0.63	0.446667	0.64	0.56	0.62	0.36	down
ELMOD3	chr2:85435027:85435463:+@chr2:85435710|85437601:85437886:+	0.36	0.62	0.36	0.2	0.3	0.26	0.253333	0.446667	0.3	0.62	0.2	0.36	up
ELMOD3	chr2:85436189:85436350:+@chr2:85437236:85437301:+@chr2:85437601:85438376:+	0.4	0.5	0.41	0.19	0.23	0.24	0.22	0.436667	0.24	0.5	0.19	0.4	up
ENDOV	chr17:76003543:76004216:+@chr17:76010535|76010601:76010640:+	0.1	0.23	0.15	0.32	0.33	0.39	0.346667	0.16	0.39	0.23	0.32	0.1	down
EPHB6	chr7:142278089:142278282:+@chr7:142278405:142278560:+@chr7:142278671:142279851:+	0.87	0.79	0.58	0.48	0.21	0.23	0.306667	0.746667	0.48	0.87	0.21	0.58	up
EXOC7	chr17:71602090:71602257:-@chr17:71598005:71598073:-@chr17:71596851:71596996:-	0.16	0.21	0.21	0.53	0.62	0.66	0.603333	0.193333	0.66	0.21	0.53	0.16	down
EXOC7	chr17:71598819:71598911:-@chr17:71598005:71598157:-@chr17:71596851:71596996:-	0.17	0.19	0.17	0.44	0.37	0.5	0.436667	0.176667	0.5	0.19	0.37	0.17	down
EXOC7	chr17:71602090:71602257:-@chr17:71598819:71598911:-@chr17:71598001:71598073:-	0.44	0.58	0.37	0.25	0.23	0.17	0.216667	0.463333	0.25	0.58	0.17	0.37	up
FAM131A	chr3:185537793:185537853:+@chr3:185538869:185539011:+@chr3:185542206:185542299:+	0.34	0.21	0.19	0.38	0.4	0.43	0.403333	0.246667	0.43	0.34	0.38	0.19	down
FAM136A	chr2:70382239:70382158|70382044:-@chr2:70381144:70381616:-	0.69	0.7	0.86	0.68	0.56	0.55	0.596667	0.75	0.68	0.86	0.55	0.69	up
FAM193B	chr5:176891807:176891763|176891560:-@chr5:176890889:176891128:-	0.18	0.25	0.27	0.39	0.46	0.31	0.386667	0.233333	0.46	0.27	0.31	0.18	down
FAM193B	chr5:176892050:176892248:-@chr5:176891763:176891807:-@chr5:176891560:176891738:-@chr5:176890889:176891128:-	0.3	0.22	0.24	0.53	0.43	0.37	0.443333	0.253333	0.53	0.3	0.37	0.22	down
FAM21A	chr10:51555823:51555945:+@chr10:51556926:51556988:+@chr10:51557349:51557561:+	0.87	0.83	0.81	0.94	0.97	0.96	0.956667	0.836667	0.97	0.87	0.94	0.81	down
FAM64A	chr17:6291507:6291814|6291806:+@chr17:6293360:6293451:+	0.2	0.35	0.31	0.17	0.19	0.15	0.17	0.286667	0.19	0.35	0.15	0.2	up
FIGNL1	chr7:50485493:50485582:-@chr7:50484771:50484915:-@chr7:50483373:50483481:-	0.59	0.72	0.49	0.9	0.9	0.82	0.873333	0.6	0.9	0.72	0.82	0.49	down
FIGNL1	chr7:50485493:50485582:-@chr7:50484737:50484915:-@chr7:50483373:50483481:-	0.56	0.84	0.48	0.89	0.86	0.87	0.873333	0.626667	0.89	0.84	0.86	0.48	down
FIGNL1	chr7:50484915:50484771|50484748:-@chr7:50483373:50483481:-	0.7	0.73	0.78	0.68	0.62	0.55	0.616667	0.736667	0.68	0.78	0.55	0.7	up
FIGNL1	chr7:50484915:50484737|50484692:-@chr7:50483373:50483481:-	0.73	0.59	0.6	0.5	0.23	0.53	0.42	0.64	0.53	0.73	0.23	0.59	up
FIGNL1	chr7:50485493:50485582:-@chr7:50484310:50484915:-@chr7:50483373:50483481:-	0.48	0.75	0.52	0.83	0.81	0.81	0.816667	0.583333	0.83	0.75	0.81	0.48	down
FIGNL1	chr7:50485493:50485582:-@chr7:50484748:50484915:-@chr7:50483373:50483481:-	0.63	0.79	0.55	0.9	0.87	0.84	0.87	0.656667	0.9	0.79	0.84	0.55	down
FKTN	chr9:107398700:107398759:+@chr9:107400188:107400285:+@chr9:107400733:107400803:+@chr9:107403247:107403450:+	0.65	0.65	0.54	0.8	0.81	0.71	0.773333	0.613333	0.81	0.65	0.71	0.54	down
FKTN	chr9:107398700:107398759:+@chr9:107400188:107400285:+@chr9:107403020:107403143:+@chr9:107403247:107403450:+	0.21	0.28	0.22	0.12	0.11	0.15	0.126667	0.236667	0.15	0.28	0.11	0.21	up
FLNB	chr3:58099049:58099296:+@chr3:58102625:58102696:+@chr3:58103417:58103519:+	0.57	0.57	0.68	0.92	0.89	0.96	0.923333	0.606667	0.96	0.68	0.89	0.57	down
FLNB	chr3:58099049:58099296:+@chr3:58102625:58102663:+@chr3:58103417:58103519:+	0.46	0.47	0.62	0.87	0.84	0.93	0.88	0.516667	0.93	0.62	0.84	0.46	down
GALE	chr1:23995859:23995774|23995586:-@chr1:23995228:23995342:-	0.66	0.7	0.49	0.29	0.26	0.31	0.286667	0.616667	0.31	0.7	0.26	0.49	up
GALE	chr1:23995774:23995859:-@chr1:23995586:23995663:-@chr1:23995228:23995342:-	0.88	0.91	0.84	0.73	0.65	0.74	0.706667	0.876667	0.74	0.91	0.65	0.84	up
GALNT4	chr12:88443028:88443495:-@chr12:88415079:88415250:-@chr12:88409844:88410023:-	0.64	0.58	0.61	0.83	0.7	0.77	0.766667	0.61	0.83	0.64	0.7	0.58	down
GALNT4	chr12:88443028:88443495:-@chr12:88414947:88415250:-@chr12:88409844:88410023:-	0.33	0.34	0.31	0.6	0.59	0.47	0.553333	0.326667	0.6	0.34	0.47	0.31	down
GALT	chr9:34636890:34637958:+@chr9:34638045|34638089:34638168:+	0.49	0.44	0.39	0.33	0.28	0.32	0.31	0.44	0.33	0.49	0.28	0.39	up
GALT	chr9:34636659:34637255:+@chr9:34637386|34637538:34637564:+	0.43	0.29	0.39	0.5	0.49	0.53	0.506667	0.37	0.53	0.43	0.49	0.29	down
GAS5	chr1:172100018:172101308:-@chr1:172059687:172059780:-@chr1:172046893:172047067:-	0.38	0.38	0.4	0.55	0.59	0.51	0.55	0.386667	0.59	0.4	0.51	0.38	down
GOLIM4	chr3:169241874:169241956:-@chr3:169241268:169241351:-@chr3:169237318:169237476:-	0.76	0.8	0.86	0.44	0.48	0.54	0.486667	0.806667	0.54	0.86	0.44	0.76	up
GSN	chr9:123083569:123083661:+@chr9:123083974:123084052:+@chr9:123088701:123088860:+@chr9:123104062:123104266:+	0.06	0.07	0.15	0.52	0.26	0.26	0.346667	0.0933333	0.52	0.15	0.26	0.06	down
GSN	chr9:123083569:123083661:+@chr9:123084538:123084649:+@chr9:123088701:123088860:+@chr9:123104062:123104266:+	0.08	0.1	0.2	0.51	0.35	0.21	0.356667	0.126667	0.51	0.2	0.21	0.08	down
GSN	chr9:123083569:123083661:+@chr9:123088701:123088860:+@chr9:123102201:123102225:+@chr9:123104062:123104266:+	0.03	0.03	0.09	0.26	0.12	0.17	0.183333	0.05	0.26	0.09	0.12	0.03	down
GSN	chr9:123083569:123083661:+@chr9:123085418:123085539:+@chr9:123104062:123104266:+	0.01	0.01	0.02	0.19	0.06	0.18	0.143333	0.0133333	0.19	0.02	0.06	0.01	down
GSN	chr9:123083569:123083661:+@chr9:123088701:123088860:+@chr9:123099865:123099941:+@chr9:123104062:123104266:+	0.05	0.06	0.18	0.45	0.22	0.32	0.33	0.0966667	0.45	0.18	0.22	0.05	down
GSN	chr9:123083569:123083661:+@chr9:123083974:123084052:+@chr9:123104023:123104266:+	0.04	0.05	0.08	0.19	0.15	0.32	0.22	0.0566667	0.32	0.08	0.15	0.04	down
GSN	chr9:123083569:123083661:+@chr9:123102164:123102225:+@chr9:123104023:123104266:+	0.08	0.06	0.1	0.25	0.23	0.26	0.246667	0.08	0.26	0.1	0.23	0.06	down
GSN	chr9:123083569:123083661:+@chr9:123088182:123088284:+@chr9:123102164:123102225:+@chr9:123104023:123104266:+	0.11	0.11	0.17	0.44	0.32	0.41	0.39	0.13	0.44	0.17	0.32	0.11	down
GSN	chr9:123083569:123083661:+@chr9:123104070:123104266:+@chr9:123105010:123105164:+	0.95	0.92	0.93	0.78	0.71	0.84	0.776667	0.933333	0.84	0.95	0.71	0.92	up
GSN	chr9:123083569:123083661:+@chr9:123083974:123084052:+@chr9:123102201:123102225:+@chr9:123104062:123104266:+	0.05	0.11	0.22	0.36	0.27	0.35	0.326667	0.126667	0.36	0.22	0.27	0.05	down
GSN	chr9:123083569:123083661:+@chr9:123083974:123084052:+@chr9:123102164:123102225:+@chr9:123104023:123104266:+	0.14	0.37	0.21	0.4	0.51	0.44	0.45	0.24	0.51	0.37	0.4	0.14	down
GSN	chr9:123083569:123083661:+@chr9:123099865:123099941:+@chr9:123102201:123102225:+@chr9:123104062:123104266:+	0.08	0.07	0.11	0.41	0.26	0.26	0.31	0.0866667	0.41	0.11	0.26	0.07	down
GSN	chr9:123083569:123083661:+@chr9:123084538:123084649:+@chr9:123102201:123102225:+@chr9:123104062:123104266:+	0.05	0.11	0.09	0.3	0.25	0.24	0.263333	0.0833333	0.3	0.11	0.24	0.05	down
GSN	chr9:123083569:123083661:+@chr9:123102201:123102225:+@chr9:123104023:123104266:+	0.13	0.24	0.19	0.41	0.38	0.42	0.403333	0.186667	0.42	0.24	0.38	0.13	down
GSN	chr9:123083569:123083661:+@chr9:123088182:123088284:+@chr9:123099865:123099941:+@chr9:123104062:123104266:+	0.09	0.24	0.18	0.53	0.37	0.49	0.463333	0.17	0.53	0.24	0.37	0.09	down
GSN	chr9:123083569:123083661:+@chr9:123102155:123102225:+@chr9:123104023:123104266:+	0.08	0.07	0.15	0.44	0.18	0.35	0.323333	0.1	0.44	0.15	0.18	0.07	down
GSN	chr9:123083569:123083661:+@chr9:123083974:123084052:+@chr9:123084538:123084649:+@chr9:123104062:123104266:+	0.13	0.26	0.09	0.38	0.35	0.31	0.346667	0.16	0.38	0.26	0.31	0.09	down
GSN	chr9:123083569:123083661:+@chr9:123083974:123084052:+@chr9:123088182:123088284:+@chr9:123104062:123104266:+	0.1	0.19	0.16	0.44	0.36	0.35	0.383333	0.15	0.44	0.19	0.35	0.1	down
GSN	chr9:123083569:123083661:+@chr9:123083974:123084052:+@chr9:123084538:123084649:+@chr9:123104070:123104266:+	0.06	0.23	0.2	0.55	0.46	0.33	0.446667	0.163333	0.55	0.23	0.33	0.06	down
GSN	chr9:123083569:123083661:+@chr9:123104062:123104266:+@chr9:123105010:123105164:+	0.96	0.94	0.94	0.8	0.78	0.85	0.81	0.946667	0.85	0.96	0.78	0.94	up
GSN	chr9:123083569:123083661:+@chr9:123088182:123088284:+@chr9:123102201:123102225:+@chr9:123104062:123104266:+	0.04	0.04	0.08	0.32	0.22	0.2	0.246667	0.0533333	0.32	0.08	0.2	0.04	down
GSN	chr9:123083569:123083665|123083661:+@chr9:123104062:123104266:+	0.05	0.05	0.05	0.32	0.16	0.47	0.316667	0.05	0.47	0.05	0.16	0.05	down
GSN	chr9:123083569:123083661:+@chr9:123088701:123088860:+@chr9:123104062:123104266:+	0.01	0.01	0.02	0.22	0.05	0.18	0.15	0.0133333	0.22	0.02	0.05	0.01	down
GULP1	chr2:188865432:188866084:+@chr2:188956735|188956764:188956861:+	0.72	0.89	0.79	0.96	0.93	0.94	0.943333	0.8	0.96	0.89	0.93	0.72	down
INF2	chr14:104251585:104252238:+@chr14:104252666:104252722:+@chr14:104256177:104256994:+	0.53	0.75	0.74	0.92	0.94	0.88	0.913333	0.673333	0.94	0.75	0.88	0.53	down
ITGA6	chr2:173070949:173071074:+@chr2:173074746:173074875:+@chr2:173077065:173079433:+	0.28	0.35	0.26	0.47	0.58	0.62	0.556667	0.296667	0.62	0.35	0.47	0.26	down
KIAA0754	chr1:39701871:39701945:+@chr1:39703354:39703371:+@chr1:39706874:39706991:+	0.19	0.27	0.21	0.33	0.33	0.34	0.333333	0.223333	0.34	0.27	0.33	0.19	down
KIAA0895L	chr16:65773101:65773010|65772994:-@chr16:65771445:65772070:-	0.26	0.25	0.16	0.1	0.12	0.08	0.1	0.223333	0.12	0.26	0.08	0.16	up
KIF13A	chr6:17902459:17902605:-@chr6:17898082:17898120:-@chr6:17895986:17896085:-	0.85	0.83	0.57	0.56	0.45	0.38	0.463333	0.75	0.56	0.85	0.38	0.57	up
KLHDC4	chr16:86339780:86339916:-@chr16:86321655:86321751:-@chr16:86317872:86318031:-	0.87	0.87	0.88	0.84	0.66	0.8	0.766667	0.873333	0.84	0.88	0.66	0.87	up
LAS1L	chrX:64665817:64665863:-@chrX:64664863:64664974:-@chrX:64661570:64661655:-	0.6	0.77	0.72	0.8	0.82	0.78	0.8	0.696667	0.82	0.77	0.78	0.6	down
LINC01184	chr5:127446326:127447337:-@chr5:127445782|127445785:127445564:-	0.4	0.32	0.2	0.46	0.52	0.41	0.463333	0.306667	0.52	0.4	0.41	0.2	down
LINC01184	chr5:127446326:127447337:-@chr5:127445564:127445785:-@chr5:127425965:127426091:-@chr5:127424735:127424835:-	0.76	0.79	0.85	0.94	0.92	0.89	0.916667	0.8	0.94	0.85	0.89	0.76	down
LOC101928160	chr8:144845231:144845871:+@chr8:144846403:144846488:+@chr8:144847829:144849593:+	0.05	0.07	0.08	0.19	0.24	0.09	0.173333	0.0666667	0.24	0.08	0.09	0.05	down
LOC102724993	chr16:16350055:16350090:+@chr16:16351269:16351371:+@chr16:16351450:16351966:+	0.12	0.14	0.13	0.24	0.15	0.32	0.236667	0.13	0.32	0.14	0.15	0.12	down
LOC102724993	chr16:16350055:16350090:+@chr16:16350587:16350656:+@chr16:16351450:16351966:+	0.56	0.58	0.76	0.88	0.77	0.84	0.83	0.633333	0.88	0.76	0.77	0.56	down
LOC105371397	chr16:86339780:86339916:-@chr16:86321655:86321751:-@chr16:86317872:86318031:-	0.87	0.87	0.88	0.84	0.66	0.8	0.766667	0.873333	0.84	0.88	0.66	0.87	up
LRRC14	chr8:145714171:145714233:+@chr8:145714941:145715007:+@chr8:145715807:145716246:+	0.07	0.08	0.12	0.17	0.33	0.41	0.303333	0.09	0.41	0.12	0.17	0.07	down
LSR	chr19:40441688:40441807:+@chr19:40445289:40445439:+@chr19:40449102:40449275:+	0.63	0.72	0.62	0.37	0.36	0.42	0.383333	0.656667	0.42	0.72	0.36	0.62	up
LSR	chr19:40441688:40441807:+@chr19:40445239:40445435:+@chr19:40449102:40449275:+	0.59	0.71	0.61	0.37	0.34	0.39	0.366667	0.636667	0.39	0.71	0.34	0.59	up
LSR	chr19:40441688:40441807:+@chr19:40445289:40445435:+@chr19:40449102:40449275:+	0.75	0.82	0.75	0.53	0.51	0.55	0.53	0.773333	0.55	0.82	0.51	0.75	up
LYRM1	chr16:20821309:20821540:+@chr16:20830006:20830087:+@chr16:20834379:20834885:+	0.41	0.21	0.46	0.1	0.17	0.05	0.106667	0.36	0.17	0.46	0.05	0.21	up
MACF1	chr1:39701871:39701945:+@chr1:39703354:39703371:+@chr1:39706874:39706991:+	0.19	0.27	0.21	0.33	0.33	0.34	0.333333	0.223333	0.34	0.27	0.33	0.19	down
MAN2C1	chr15:73436187:73436296:-@chr15:73436000:73436079:-	0.49	0.46	0.42	0.29	0.38	0.19	0.286667	0.456667	0.38	0.49	0.19	0.42	up
MBP	chr18:72857776:72858233:-@chr18:72829821:72829856:-@chr18:72829439:72829464:-@chr18:72819771:72821415:-	0.32	0.3	0.38	0.41	0.47	0.62	0.5	0.333333	0.62	0.38	0.41	0.3	down
MFAP3L	chr4:171161397:171161527:-@chr4:171159691:171159952:-@chr4:171144323:171150035:-	0.21	0.25	0.14	0.07	0.08	0.11	0.0866667	0.2	0.11	0.25	0.07	0.14	up
MIR4730	chr17:76003543:76004216:+@chr17:76010535|76010601:76010640:+	0.1	0.23	0.15	0.32	0.33	0.39	0.346667	0.16	0.39	0.23	0.32	0.1	down
MIR561	chr2:188865432:188866084:+@chr2:188956735|188956764:188956861:+	0.72	0.89	0.79	0.96	0.93	0.94	0.943333	0.8	0.96	0.89	0.93	0.72	down
MIR631	chr15:73436187:73436296:-@chr15:73436000:73436079:-	0.49	0.46	0.42	0.29	0.38	0.19	0.286667	0.456667	0.38	0.49	0.19	0.42	up
MIR937	chr8:144962767:144963183:-@chr8:144961710:144961772:-@chr8:144961082:144961171:-	0.73	0.74	0.71	0.33	0.21	0.2	0.246667	0.726667	0.33	0.74	0.2	0.71	up
MOK	chr14:101768625:101769879:-@chr14:101761185:101762498:-@chr14:101760590:101760884:-	0.56	0.23	0.45	0.22	0.17	0.19	0.193333	0.413333	0.22	0.56	0.17	0.23	up
MORF4L2	chrX:102826265:102826327:-@chrX:102820204|102820235:102820083:-	0.67	0.9	0.91	0.93	0.93	0.93	0.93	0.826667	0.93	0.91	0.93	0.67	down
MPDU1	chr17:7430734:7430880:+@chr17:7431203:7431313:+	0.38	0.3	0.25	0.2	0.17	0.24	0.203333	0.31	0.24	0.38	0.17	0.25	up
MPDU1	chr17:7429988:7430120:+@chr17:7430748:7430819:+@chr17:7431203:7431313:+	0.38	0.3	0.42	0.63	0.52	0.63	0.593333	0.366667	0.63	0.42	0.52	0.3	down
MPDU1	chr17:7429988:7430120:+@chr17:7430698:7430819:+@chr17:7431203:7431313:+	0.7	0.67	0.69	0.79	0.76	0.81	0.786667	0.686667	0.81	0.7	0.76	0.67	down
MPZL1	chr1:166000919:166001610:+@chr1:166009097:166009229:+@chr1:166023681:166027780:+	0.39	0.33	0.41	0.3	0.23	0.29	0.273333	0.376667	0.3	0.41	0.23	0.33	up
MTMR3	chr22:29136585:29136668:+@chr22:29141748|29141937:29142076:+	0.8	0.78	0.75	0.54	0.71	0.61	0.62	0.776667	0.71	0.8	0.54	0.75	up
NDUFAF7	chr2:37322225:37323340:+@chr2:37324510|37324558:37324620:+	0.5	0.55	0.45	0.76	0.61	0.84	0.736667	0.5	0.84	0.55	0.61	0.45	down
NEIL2	chr8:11664666:11664709:+@chr8:11665092:11665253:+	0.28	0.19	0.16	0.39	0.48	0.47	0.446667	0.21	0.48	0.28	0.39	0.16	down
NF2	chr22:28407428:28407590:+@chr22:28409009:28409053:+@chr22:28420741:28424593:+	0.49	0.52	0.35	0.8	0.84	0.81	0.816667	0.453333	0.84	0.52	0.8	0.35	down
NF2	chr22:28407428:28407590:+@chr22:28409009:28409068:+@chr22:28420741:28424593:+	0.26	0.22	0.16	0.47	0.5	0.36	0.443333	0.213333	0.5	0.26	0.36	0.16	down
NPHP3	chr3:133781026:133781092:-@chr3:133780330:133780590:-	0.61	0.43	0.61	0.64	0.71	0.8	0.716667	0.55	0.8	0.61	0.64	0.43	down
NPIPA2	chr16:16350055:16350090:+@chr16:16351269:16351371:+@chr16:16351450:16351966:+	0.12	0.14	0.13	0.24	0.15	0.32	0.236667	0.13	0.32	0.14	0.15	0.12	down
NPIPA2	chr16:16350055:16350090:+@chr16:16350587:16350656:+@chr16:16351450:16351966:+	0.56	0.58	0.76	0.88	0.77	0.84	0.83	0.633333	0.88	0.76	0.77	0.56	down
NPIPA3	chr16:16350055:16350090:+@chr16:16351269:16351371:+@chr16:16351450:16351966:+	0.12	0.14	0.13	0.24	0.15	0.32	0.236667	0.13	0.32	0.14	0.15	0.12	down
NPIPA3	chr16:16350055:16350090:+@chr16:16350587:16350656:+@chr16:16351450:16351966:+	0.56	0.58	0.76	0.88	0.77	0.84	0.83	0.633333	0.88	0.76	0.77	0.56	down
NPIPA5	chr16:16350055:16350090:+@chr16:16350587:16350656:+@chr16:16351450:16351966:+	0.56	0.58	0.76	0.88	0.77	0.84	0.83	0.633333	0.88	0.76	0.77	0.56	down
NPIPA5	chr16:16350055:16350090:+@chr16:16351269:16351371:+@chr16:16351450:16351966:+	0.12	0.14	0.13	0.24	0.15	0.32	0.236667	0.13	0.32	0.14	0.15	0.12	down
NPIPA7	chr16:16350055:16350090:+@chr16:16351269:16351371:+@chr16:16351450:16351966:+	0.12	0.14	0.13	0.24	0.15	0.32	0.236667	0.13	0.32	0.14	0.15	0.12	down
NPIPA7	chr16:16350055:16350090:+@chr16:16350587:16350656:+@chr16:16351450:16351966:+	0.56	0.58	0.76	0.88	0.77	0.84	0.83	0.633333	0.88	0.76	0.77	0.56	down
NPIPA8	chr16:16350055:16350090:+@chr16:16350587:16350656:+@chr16:16351450:16351966:+	0.56	0.58	0.76	0.88	0.77	0.84	0.83	0.633333	0.88	0.76	0.77	0.56	down
NPIPA8	chr16:16350055:16350090:+@chr16:16351269:16351371:+@chr16:16351450:16351966:+	0.12	0.14	0.13	0.24	0.15	0.32	0.236667	0.13	0.32	0.14	0.15	0.12	down
NT5C	chr17:70638795:70638747|70638655:-@chr17:70637915:70638557:-	0.28	0.45	0.31	0.15	0.16	0.21	0.173333	0.346667	0.21	0.45	0.15	0.28	up
NT5C2	chr10:104924605:104924729:-@chr10:104861492:104861552:-@chr10:104856336:104856453:-	0.12	0.1	0.23	0.25	0.25	0.34	0.28	0.15	0.34	0.23	0.25	0.1	down
NUMA1	chr11:71401589:71404954:-@chr11:71401095:71401136:-@chr11:71399480:71399548:-	0.64	0.6	0.63	0.49	0.51	0.45	0.483333	0.623333	0.51	0.64	0.45	0.6	up
P4HTM	chr3:49017298:49017607:+@chr3:49018155:49018304:+	0.64	0.62	0.6	0.82	0.71	0.72	0.75	0.62	0.82	0.64	0.71	0.6	down
PAPOLG	chr2:60874610:60875659:+@chr2:60875929:60875975:+@chr2:60877701:60882725:+	0.06	0.1	0.08	0.24	0.11	0.22	0.19	0.08	0.24	0.1	0.11	0.06	down
PDLIM7	chr5:176850195:176850200:-@chr5:176849378:176849439:-	0.54	0.63	0.55	0.35	0.32	0.47	0.38	0.573333	0.47	0.63	0.32	0.54	up
PML	chr15:72104251:72104321:+@chr15:72113872|72115401:72115788:+	0.57	0.49	0.51	0.66	0.65	0.58	0.63	0.523333	0.66	0.57	0.58	0.49	down
POC1B	chr12:88443028:88443495:-@chr12:88414947:88415250:-@chr12:88409844:88410023:-	0.33	0.34	0.31	0.6	0.59	0.47	0.553333	0.326667	0.6	0.34	0.47	0.31	down
POC1B	chr12:88443028:88443495:-@chr12:88415079:88415250:-@chr12:88409844:88410023:-	0.64	0.58	0.61	0.83	0.7	0.77	0.766667	0.61	0.83	0.64	0.7	0.58	down
POC1B-GALNT4	chr12:88443028:88443495:-@chr12:88414947:88415250:-@chr12:88409844:88410023:-	0.33	0.34	0.31	0.6	0.59	0.47	0.553333	0.326667	0.6	0.34	0.47	0.31	down
POC1B-GALNT4	chr12:88443028:88443495:-@chr12:88415079:88415250:-@chr12:88409844:88410023:-	0.64	0.58	0.61	0.83	0.7	0.77	0.766667	0.61	0.83	0.64	0.7	0.58	down
POMT1	chr9:133375111:133375270:+@chr9:133375468:133375623:+	0.21	0.19	0.12	0.3	0.33	0.35	0.326667	0.173333	0.35	0.21	0.3	0.12	down
PPIA	chr7:44804872:44805028|44804938:+@chr7:44805371:44805401:+	0.73	0.65	0.74	0.31	0.48	0.56	0.45	0.706667	0.56	0.74	0.31	0.65	up
PTBP2	chr1:97051173:97051250:+@chr1:97051417|97051420:97052937:+	0.59	0.39	0.57	0.68	0.81	0.7	0.73	0.516667	0.81	0.59	0.68	0.39	down
PXN	chr12:119187803:119187959:-@chr12:119186418:119186502:-@chr12:119149025:119149303:-@chr12:119146337:119146563:-	0.47	0.39	0.36	0.52	0.55	0.49	0.52	0.406667	0.55	0.47	0.49	0.36	down
PXN	chr12:119187803:119187959:-@chr12:119149025:119149303:-@chr12:119146829:119146913:-@chr12:119146337:119146563:-	0.36	0.33	0.29	0.48	0.43	0.45	0.453333	0.326667	0.48	0.36	0.43	0.29	down
PXN	chr12:119187803:119187959:-@chr12:119186418:119186502:-@chr12:119146829:119146913:-@chr12:119146337:119146563:-	0.09	0.12	0.11	0.29	0.17	0.2	0.22	0.106667	0.29	0.12	0.17	0.09	down
RAPGEF2	chr4:160483883:160484006:+@chr4:160484638:160484661:+@chr4:160485708:160485931:+	0.15	0.09	0.18	0.23	0.25	0.37	0.283333	0.14	0.37	0.18	0.23	0.09	down
RAPGEF2	chr4:160491661:160491783|160491735:+@chr4:160493287:160493512:+	0.16	0.45	0.23	0.69	0.52	0.74	0.65	0.28	0.74	0.45	0.52	0.16	down
REPS1	chr6:139292807:139292928:-@chr6:139289227:139289311:-@chr6:139283867:139283954:-	0.28	0.4	0.24	0.62	0.58	0.71	0.636667	0.306667	0.71	0.4	0.58	0.24	down
REPS1	chr6:139292807:139292928:-@chr6:139289231:139289308:-@chr6:139283867:139283954:-	0.12	0.28	0.29	0.53	0.6	0.6	0.576667	0.23	0.6	0.29	0.53	0.12	down
REPS1	chr6:139292807:139292928:-@chr6:139289231:139289311:-@chr6:139283867:139283954:-	0.4	0.54	0.45	0.73	0.78	0.83	0.78	0.463333	0.83	0.54	0.73	0.4	down
RNF167	chr17:4784074:4784400:+@chr17:4784963:4785033:+@chr17:4785117:4785197:+	0.5	0.64	0.55	0.84	0.78	0.9	0.84	0.563333	0.9	0.64	0.78	0.5	down
RNF31	chr14:23699569:23700387:+@chr14:23701193:23701329:+@chr14:23702015:23702198:+	0.96	0.96	0.98	0.6	0.86	0.38	0.613333	0.966667	0.86	0.98	0.38	0.96	up
RNH1	chr11:497113:497300:-@chr11:494824:495001:-@chr11:492062:492249:-	0.22	0.25	0.24	0.44	0.37	0.34	0.383333	0.236667	0.44	0.25	0.34	0.22	down
RNH1	chr11:496609:497112:-@chr11:494824:494972:-@chr11:492062:492249:-	0.5	0.56	0.59	0.72	0.72	0.6	0.68	0.55	0.72	0.59	0.6	0.5	down
RNH1	chr11:497113:497300:-@chr11:494824:494996:-@chr11:492062:492249:-	0.26	0.27	0.26	0.48	0.41	0.38	0.423333	0.263333	0.48	0.27	0.38	0.26	down
RPAIN	chr17:5266813:5266873:+@chr17:5270015|5272115:5272255:+	0.45	0.18	0.24	0.17	0.16	0.11	0.146667	0.29	0.17	0.45	0.11	0.18	up
RPS24	chr10:79466958:79467073|79467068:+@chr10:79469968:79469989:+	0.27	0.27	0.24	0.49	0.54	0.52	0.516667	0.26	0.54	0.27	0.49	0.24	down
RPS24	chr10:79466958:79467068:+@chr10:79469968:79469989:+@chr10:79470379:79470511:+	0.19	0.18	0.19	0.07	0.09	0.08	0.08	0.186667	0.09	0.19	0.07	0.18	up
RTN3	chr11:63228899:63228955:+@chr11:63242750:63245080:+@chr11:63270995:63271072:+@chr11:63274039:63274471:+	0.34	0.4	0.44	0.27	0.3	0.21	0.26	0.393333	0.3	0.44	0.21	0.34	up
SCRIB	chr8:144962767:144963183:-@chr8:144961710:144961772:-@chr8:144961082:144961171:-	0.73	0.74	0.71	0.33	0.21	0.2	0.246667	0.726667	0.33	0.74	0.2	0.71	up
SEC14L2	chr22:29136585:29136668:+@chr22:29141748|29141937:29142076:+	0.8	0.78	0.75	0.54	0.71	0.61	0.62	0.776667	0.71	0.8	0.54	0.75	up
SELENOO	chr22:48981535:48982146:+@chr22:48985475:48985580:+@chr22:48986873:48989272:+	0.21	0.24	0.27	0.47	0.34	0.31	0.373333	0.24	0.47	0.27	0.31	0.21	down
SERGEF	chr11:17973919:17974032:-@chr11:17971050:17971116:-@chr11:17966720:17966878:-	0.78	0.89	0.82	0.74	0.68	0.68	0.7	0.83	0.74	0.89	0.68	0.78	up
SKIL	chr3:171585015:171585247|171585109:+@chr3:171590705:171590946:+	0.89	0.85	0.83	0.81	0.68	0.7	0.73	0.856667	0.81	0.89	0.68	0.83	up
SLC2A8	chr9:129202007:129202106:+@chr9:129204657:129204853:+@chr9:129205760:129205903:+	0.41	0.42	0.44	0.48	0.55	0.57	0.533333	0.423333	0.57	0.44	0.48	0.41	down
SLK	chr10:105757925:105758104:+@chr10:105760564:105760656:+@chr10:105767908:105768037:+	0.23	0.29	0.27	0.76	0.78	0.84	0.793333	0.263333	0.84	0.29	0.76	0.23	down
SMC2	chr9:105897426:105897654|105897430:+@chr9:105901746:105901784:+	0.55	0.47	0.54	0.39	0.45	0.36	0.4	0.52	0.45	0.55	0.36	0.47	up
SMC2	chr9:105897384:105897654:+@chr9:105900548:105900670:+@chr9:105901746:105901784:+	0.44	0.53	0.56	0.35	0.36	0.4	0.37	0.51	0.4	0.56	0.35	0.44	up
TBC1D5	chr3:17602849:17603053:-@chr3:17592910:17593045:-@chr3:17578515:17578638:-@chr3:17524970:17525101:-	0.34	0.23	0.26	0.08	0.09	0.1	0.09	0.276667	0.1	0.34	0.08	0.23	up
TBRG1	chr11:123997953:124001009:+@chr11:124001579:124001715:+@chr11:124001799:124001857:+@chr11:124002010:124002156:+	0.72	0.78	0.71	0.9	0.88	0.79	0.856667	0.736667	0.9	0.78	0.79	0.71	down
TCF25	chr16:88492676:88492796|88492785:+@chr16:88494544:88494950:+	0.76	0.7	0.85	0.88	0.87	0.89	0.88	0.77	0.89	0.85	0.87	0.7	down
TCF7L2	chr10:114701154:114701356:+@chr10:114714305:114714373:+@chr10:114789774:114789879:+	0.08	0.1	0.22	0.56	0.54	0.55	0.55	0.133333	0.56	0.22	0.54	0.08	down
THOC1	chr18:215337:215403:-@chr18:215089:215139:-@chr18:214924:214994:-	0.71	0.83	0.79	0.86	0.91	0.9	0.89	0.776667	0.91	0.83	0.86	0.71	down
THUMPD2	chr2:39852284:39852159|39852149:-@chr2:39850354:39850763:-	0.76	0.63	0.8	0.57	0.59	0.62	0.593333	0.73	0.62	0.8	0.57	0.63	up
TLE1	chr9:83457023:83456949|83456919:-@chr9:83438128:83439036:-	0.46	0.49	0.6	0.32	0.42	0.42	0.386667	0.516667	0.42	0.6	0.32	0.46	up
TMEM230	chr20:5041376:5041733:-@chr20:5040410:5040454:-@chr20:5040146:5040251:-@chr20:5037804:5038091:-	0.36	0.37	0.45	0.28	0.23	0.27	0.26	0.393333	0.28	0.45	0.23	0.36	up
TMEM230	chr20:5041389:5041733:-@chr20:5040410:5040454:-@chr20:5040146:5040251:-@chr20:5037804:5038091:-	0.43	0.43	0.41	0.3	0.25	0.3	0.283333	0.423333	0.3	0.43	0.25	0.41	up
TRAPPC2L	chr16:87452528:87452698:+@chr16:87453254|87453482:87453659:+	0.19	0.2	0.2	0.31	0.34	0.29	0.313333	0.196667	0.34	0.2	0.29	0.19	down
UPF3B	chrX:118869486:118869592:-@chrX:118863189:118863287:-@chrX:118861182:118861292:-	0.92	0.91	0.87	0.78	0.81	0.79	0.793333	0.9	0.81	0.92	0.78	0.87	up
USO1	chr4:76933867:76934078:+@chr4:76935513:76935533:+@chr4:76939799:76939909:+	0.01	0.01	0.01	0.23	0.17	0.09	0.163333	0.01	0.23	0.01	0.09	0.01	down
USP19	chr3:49130094:49130267:-@chr3:49129874:49130007:-@chr3:49129158:49129380:-	0.79	0.76	0.77	0.67	0.61	0.64	0.64	0.773333	0.67	0.79	0.61	0.76	up
USP28	chr11:113199537:113199632:-@chr11:113193590:113193769:-@chr11:113191106:113191314:-	0.75	0.75	0.82	0.87	0.86	0.93	0.886667	0.773333	0.93	0.82	0.86	0.75	down
VPS28	chr8:145623100:145623170:-@chr8:145622217:145622399:-	0.1	0.09	0.16	0.44	0.24	0.25	0.31	0.116667	0.44	0.16	0.24	0.09	down
VPS29	chr12:109421723:109424313:-@chr12:109421044|109421047:109421008:-	0.53	0.41	0.47	0.62	0.56	0.54	0.573333	0.47	0.62	0.53	0.54	0.41	down
WSB1	chr17:22657361:22658035:+@chr17:22658897:22659072:+@chr17:22660253:22660425:+	0.32	0.22	0.4	0.09	0.11	0.03	0.0766667	0.313333	0.11	0.4	0.03	0.22	up
WSB1	chr17:22658897:22659060:+@chr17:22660253:22660425:+	0.68	0.55	0.55	0.37	0.27	0.2	0.28	0.593333	0.37	0.68	0.2	0.55	up
WSB1	chr17:22657361:22658035:+@chr17:22658897:22659060:+@chr17:22660253:22660425:+	0.22	0.25	0.37	0.11	0.09	0.05	0.0833333	0.28	0.11	0.37	0.05	0.22	up
WSB1	chr17:22657361:22658035:+@chr17:22658897|22660253:22660425:+	0.41	0.41	0.5	0.22	0.19	0.17	0.193333	0.44	0.22	0.5	0.17	0.41	up
ZCCHC6	chr9:88106011:88106336:-@chr9:88103934:88104007:-@chr9:88103502:88103565:-	0.11	0.14	0.08	0.74	0.55	0.44	0.576667	0.11	0.74	0.14	0.44	0.08	down
ZFYVE27	chr10:99488224:99488421|99488396:+@chr10:99492841:99493026:+	0.82	0.81	0.89	0.77	0.71	0.65	0.71	0.84	0.77	0.89	0.65	0.81	up
ZNF133	chr20:18234942:18235037:+@chr20:18235350:18235391:+@chr20:18238813:18238950:+@chr20:18243713:18245640:+	0.1	0.11	0.15	0.31	0.21	0.19	0.236667	0.12	0.31	0.15	0.19	0.1	down
ZNF669	chr1:245332038:245331916|245331912:-@chr1:245331656:245331716:-	0.9	0.91	0.91	0.85	0.74	0.82	0.803333	0.906667	0.85	0.91	0.74	0.9	up
ZNF707	chr8:144845231:144845871:+@chr8:144846403:144846488:+@chr8:144847829:144849593:+	0.05	0.07	0.08	0.19	0.24	0.09	0.173333	0.0666667	0.24	0.08	0.09	0.05	down

## Sheet: RBM47_OL_with_HCT116
Supplementary File 2. List of alternative splicing targets both in RBM47 knocking down H358 line and HCT116 EpCAMhi/lo , filtered by ΔPSI > 0.1
symbol	event_name	psi_H358_RBM47_KD_1	psi_H358_RBM47_KD_2	psi_H358_RBM47_KD_3	psi_H358_RBM47_WT_1	psi_H358_RBM47_WT_2	psi_H358_RBM47_WT_3	psi_mean_group1	psi_mean_group2	psi_max_group1	psi_max_group2	psi_min_group1	psi_min_group2	change_type
ACAD9	chr3:130081023:130081374:+@chr3:130086190|130086208:130086279:+	0.37	0.44	0.51	0.32	0.23	0.29	0.28	0.44	0.32	0.51	0.23	0.37	up
ACSF2	chr17:45896578:45896654:+@chr17:45896886:45896959:+@chr17:45903388:45904081:+	0.48	0.22	0.42	0.53	0.53	0.73	0.596667	0.373333	0.73	0.48	0.53	0.22	down
AKAP9	chr7:91507924:91508148:+@chr7:91509296:91509436:+@chr7:91509918:91510393:+	0.77	0.64	0.6	0.33	0.36	0.32	0.336667	0.67	0.36	0.77	0.32	0.6	up
ARFIP1	chr4:154004208:154004316:+@chr4:154011355:154011450:+@chr4:154013054:154013166:+	0.56	0.28	0.41	0.71	0.83	0.88	0.806667	0.416667	0.88	0.56	0.71	0.28	down
ARHGAP17	chr16:24860809:24860965:-@chr16:24858186:24858419:-@chr16:24854292:24854461:-	0.08	0.06	0.05	0.35	0.18	0.27	0.266667	0.0633333	0.35	0.08	0.18	0.05	down
ASAH1	chr8:17969009:17969087:-@chr8:17966246:17966320:-@chr8:17964974:17965019:-	0.68	0.76	0.69	0.84	0.81	0.86	0.836667	0.71	0.86	0.76	0.81	0.68	down
ATRX	chrX:76838721:76838848:-@chrX:76835969:76836082:-@chrX:76830967:76831076:-	0.94	0.75	0.74	0.66	0.68	0.67	0.67	0.81	0.68	0.94	0.66	0.74	up
AURKB	chr17:8051410:8051361|8050793:-@chr17:8050534:8050682:-	0.66	0.65	0.68	0.59	0.52	0.55	0.553333	0.663333	0.59	0.68	0.52	0.65	up
AURKB	chr17:8051410:8051219|8051213:-@chr17:8050783:8050931:-	0.1	0.07	0.06	0.13	0.2	0.32	0.216667	0.0766667	0.32	0.1	0.13	0.06	down
AURKB	chr17:8051361:8051413:-@chr17:8050793:8050977:-@chr17:8050534:8050682:-	0.73	0.72	0.7	0.62	0.63	0.56	0.603333	0.716667	0.63	0.73	0.56	0.7	up
BCAT2	chr19:54006053:54006272:-@chr19:54001586:54001786:-@chr19:53995256:53995366:-	0.61	0.72	0.68	0.89	0.74	0.85	0.826667	0.67	0.89	0.72	0.74	0.61	down
BRD9	chr5:922360:922519:-@chr5:921722:922234:-@chr5:918529:918696:-	0.33	0.39	0.4	0.2	0.19	0.17	0.186667	0.373333	0.2	0.4	0.17	0.33	up
BRD9	chr5:944270:944665:-@chr5:942762|942881:942702:-	0.75	0.82	0.68	0.66	0.48	0.56	0.566667	0.75	0.66	0.82	0.48	0.68	up
BRD9	chr5:922360:922519:-@chr5:921722:921919:-@chr5:918529:918696:-	0.31	0.43	0.37	0.2	0.18	0.13	0.17	0.37	0.2	0.43	0.13	0.31	up
BRSK2	chr11:1436985:1437045:+@chr11:1438306|1438776:1439520:+	0.39	0.21	0.19	0.14	0.16	0.12	0.14	0.263333	0.16	0.39	0.12	0.19	up
BTBD10	chr11:13441215:13441419:-@chr11:13423147:13423276:-@chr11:13399765:13399961:-	0.48	0.48	0.52	0.39	0.46	0.23	0.36	0.493333	0.46	0.52	0.23	0.48	up
C1orf159	chr1:1009596:1009749:-@chr1:1009158:1009329:-@chr1:1007061:1008230:-	0.43	0.35	0.5	0.33	0.25	0.29	0.29	0.426667	0.33	0.5	0.25	0.35	up
C21orf2	chr21:44575227:44575134|44574774:-@chr21:44573235:44574637:-	0.55	0.53	0.46	0.43	0.38	0.34	0.383333	0.513333	0.43	0.55	0.34	0.46	up
C21orf2	chr21:44580115:44580069|44578372:-@chr21:44577344:44577573:-	0.62	0.74	0.62	0.49	0.29	0.28	0.353333	0.66	0.49	0.74	0.28	0.62	up
C22orf29	chr22:18221966:18222409:-@chr22:18188751:18188898:-@chr22:18179808:18179970:-	0.65	0.66	0.71	0.51	0.41	0.56	0.493333	0.673333	0.56	0.71	0.41	0.65	up
C2orf42	chr2:70271609:70271707:-@chr2:70271179:70271351:-@chr2:70263303:70263571:-	0.13	0.19	0.24	0.27	0.29	0.37	0.31	0.186667	0.37	0.24	0.27	0.13	down
C2orf42	chr2:70271609:70271707:-@chr2:70263431:70263571:-@chr2:70261799:70262633:-	0.43	0.4	0.29	0.14	0.27	0.15	0.186667	0.373333	0.27	0.43	0.14	0.29	up
C5orf45	chr5:179200478:179200565:-@chr5:179196882:179197491:-	0.34	0.32	0.36	0.21	0.17	0.2	0.193333	0.34	0.21	0.36	0.17	0.32	up
CAPS	chr19:5865951:5866161|5866076:+@chr19:5866232:5868243:+	0.7	0.56	0.67	0.84	0.76	0.8	0.8	0.643333	0.84	0.7	0.76	0.56	down
CD44	chr11:35167785:35168188:+@chr11:35179205:35179318:+@chr11:35182635:35182782:+	0.16	0.11	0.23	0.03	0.05	0.06	0.0466667	0.166667	0.06	0.23	0.03	0.11	up
CD44	chr11:35167785:35168188:+@chr11:35176244:35176369:+@chr11:35188088:35188177:+@chr11:35192975:35193037:+	0.93	0.92	0.93	0.79	0.83	0.86	0.826667	0.926667	0.86	0.93	0.79	0.92	up
CD47	chr3:109252115:109252187:-@chr3:109251156:109251188:-@chr3:109244629:109248829:-	0.88	0.89	0.91	0.55	0.72	0.59	0.62	0.893333	0.72	0.91	0.55	0.88	up
CD47	chr3:109253476:109255521:-@chr3:109252115:109252139:-@chr3:109244629:109248829:-	0.09	0.11	0.06	0.45	0.47	0.4	0.44	0.0866667	0.47	0.11	0.4	0.06	down
CDK16	chrX:46962223:46963007:+@chrX:46966604|46966616:46966685:+	0.53	0.38	0.57	0.66	0.67	0.59	0.64	0.493333	0.67	0.57	0.59	0.38	down
CDK16	chrX:46966604:46966723|46966685:+@chrX:46967895:46968178:+	0.45	0.46	0.61	0.41	0.33	0.32	0.353333	0.506667	0.41	0.61	0.32	0.45	up
CDK5RAP1	chr20:31452895:31453374:-@chr20:31443602:31443709:-@chr20:31438786:31439000:-	0.61	0.58	0.56	0.2	0.47	0.32	0.33	0.583333	0.47	0.61	0.2	0.56	up
CHD3	chr17:7737848:7737978:+@chr17:7738158|7738170:7738308:+	0.62	0.62	0.69	0.6	0.52	0.5	0.54	0.643333	0.6	0.69	0.5	0.62	up
CLSTN1	chr1:9723739:9723905:-@chr1:9720143:9720199:-@chr1:9718530:9718687:-	0.55	0.57	0.6	0.06	0.08	0.07	0.07	0.573333	0.08	0.6	0.06	0.55	up
CNOT2	chr12:68990942:68991064:+@chr12:68999345:68999411:+@chr12:69012814:69012893:+@chr12:69015485:69015841:+	0.16	0.2	0.25	0.37	0.33	0.32	0.34	0.203333	0.37	0.25	0.32	0.16	down
CNOT2	chr12:68990942:68991064:+@chr12:69012814:69012893:+@chr12:69015485:69015841:+	0.67	0.65	0.82	0.86	0.88	0.92	0.886667	0.713333	0.92	0.82	0.86	0.65	down
CNPY3	chr6:43004829:43005437:+@chr6:43011128:43011189:+@chr6:43011290:43012073:+	0.26	0.21	0.23	0.47	0.5	0.28	0.416667	0.233333	0.5	0.26	0.28	0.21	down
CPNE7	chr16:88189276:88189512:+@chr16:88189740:88189833:+@chr16:88190393:88191155:+	0.4	0.34	0.3	0.26	0.22	0.19	0.223333	0.346667	0.26	0.4	0.19	0.3	up
CSNK1E	chr22:37024737:37025155:-@chr22:37021339:37021399:-@chr22:37017891:37020486:-	0.59	0.51	0.54	0.49	0.35	0.35	0.396667	0.546667	0.49	0.59	0.35	0.51	up
CTNND1	chr11:57339439:57339548:+@chr11:57339963:57340049:+@chr11:57340345:57343233:+	0.01	0.01	0.02	0.21	0.19	0.2	0.2	0.0133333	0.21	0.02	0.19	0.01	down
CTNND1	chr11:57285810:57286094:+@chr11:57313085:57313203:+@chr11:57315433:57315721:+	0.06	0.06	0.07	0.15	0.21	0.15	0.17	0.0633333	0.21	0.07	0.15	0.06	down
DCAF10	chr9:37844777:37844979:+@chr9:37847238:37847348:+@chr9:37850045:37850359:+	0.58	0.57	0.54	0.72	0.69	0.66	0.69	0.563333	0.72	0.58	0.66	0.54	down
DCAF11	chr14:23653193:23653973:+@chr14:23654431:23654441:+@chr14:23654564:23654798:+	0.5	0.5	0.48	0.43	0.21	0.21	0.283333	0.493333	0.43	0.5	0.21	0.48	up
DCTD	chr4:184075458:184075740:-@chr4:184074820:184075004:-@chr4:184073608:184073722:-	0.28	0.17	0.27	0.32	0.41	0.36	0.363333	0.24	0.41	0.28	0.32	0.17	down
DCUN1D2	chr13:113192983:113193269:-@chr13:113186372|113186539:113186156:-	0.82	0.83	0.79	0.71	0.7	0.67	0.693333	0.813333	0.71	0.83	0.67	0.79	up
DCUN1D2	chr13:113192983:113193269:-@chr13:113186372|113186512:113186156:-	0.69	0.79	0.69	0.63	0.55	0.63	0.603333	0.723333	0.63	0.79	0.55	0.69	up
DCXR	chr17:77587709:77587928:-@chr17:77587356:77587613:-	0.39	0.34	0.26	0.16	0.2	0.18	0.18	0.33	0.2	0.39	0.16	0.26	up
DDIT3	chr12:56197756:56197803:-@chr12:56197319:56197474:-	0.65	0.76	0.56	0.44	0.45	0.44	0.443333	0.656667	0.45	0.76	0.44	0.56	up
DDX11	chr12:31147137:31147221:+@chr12:31147523:31147596:+@chr12:31147778:31148992:+	0.69	0.58	0.61	0.36	0.53	0.51	0.466667	0.626667	0.53	0.69	0.36	0.58	up
DDX11	chr12:31133604:31133686:+@chr12:31134087:31134295:+	0.71	0.69	0.82	0.56	0.61	0.53	0.566667	0.74	0.61	0.82	0.53	0.69	up
DDX11	chr12:31133245:31133352:+@chr12:31133604|31134087:31134295:+	0.65	0.82	0.77	0.63	0.56	0.64	0.61	0.746667	0.64	0.82	0.56	0.65	up
DDX39A	chr19:14382417:14382360|14382233:-@chr19:14381554:14382146:-	0.28	0.35	0.36	0.44	0.68	0.79	0.636667	0.33	0.79	0.36	0.44	0.28	down
DDX54	chr12:112101331:112101519:-@chr12:112101165:112101210:-	0.16	0.33	0.16	0.07	0.1	0.06	0.0766667	0.216667	0.1	0.33	0.06	0.16	up
DHRS1	chr14:23835555:23835733:-@chr14:23831698:23831830:-@chr14:23831230:23831376:-	0.78	0.84	0.6	0.86	0.87	0.87	0.866667	0.74	0.87	0.84	0.86	0.6	down
DLG1	chr3:198292319:198292385:-@chr3:198287854:198287953:-@chr3:198287105:198287138:-@chr3:198280487:198280528:-	0.75	0.73	0.83	0.5	0.53	0.64	0.556667	0.77	0.64	0.83	0.5	0.73	up
DNAJB12	chr10:73765695:73765598|73765544:-@chr10:73762594:73764381:-	0.44	0.56	0.17	0.6	0.59	0.74	0.643333	0.39	0.74	0.56	0.59	0.17	down
DPP7	chr9:139128736:139128849:-@chr9:139128516:139128651:-	0.33	0.37	0.41	0.56	0.47	0.51	0.513333	0.37	0.56	0.41	0.47	0.33	down
DRG2	chr17:17943672:17943762:+@chr17:17944402:17944474:+	0.69	0.7	0.61	0.27	0.56	0.58	0.47	0.666667	0.58	0.7	0.27	0.61	up
EDRF1	chr10:127404241:127404397:+@chr10:127407562:127407663:+@chr10:127407917:127408038:+	0.55	0.3	0.52	0.8	0.63	0.79	0.74	0.456667	0.8	0.55	0.63	0.3	down
EIF2B5	chr3:185343534:185343624:+@chr3:185343924:185344047:+	0.56	0.38	0.43	0.21	0.18	0.18	0.19	0.456667	0.21	0.56	0.18	0.38	up
ELAC2	chr17:12840589:12840727:-@chr17:12839982:12840020:-	0.2	0.17	0.13	0.04	0.06	0.06	0.0533333	0.166667	0.06	0.2	0.04	0.13	up
ELMOD3	chr2:85435710:85435810:+@chr2:85437603:85437886:+	0.35	0.5	0.41	0.52	0.62	0.63	0.59	0.42	0.63	0.5	0.52	0.35	down
ELMOD3	chr2:85436189:85436406:+@chr2:85436504:85436530:+	0.81	0.82	0.75	0.7	0.72	0.63	0.683333	0.793333	0.72	0.82	0.63	0.75	up
EP400	chr12:131030192:131030291:+@chr12:131031987:131032094:+@chr12:131032591:131033467:+	0.11	0.2	0.23	0.25	0.42	0.31	0.326667	0.18	0.42	0.23	0.25	0.11	down
EPB41	chr1:29264056:29264257:+@chr1:29295254:29295703:+@chr1:29296906:29297034:+	0.57	0.34	0.4	0.89	0.96	0.84	0.896667	0.436667	0.96	0.57	0.84	0.34	down
EPB41L1	chr20:34144001:34144149:+@chr20:34225100:34225290:+@chr20:34226887:34227051:+	0.9	0.77	0.84	0.61	0.73	0.71	0.683333	0.836667	0.73	0.9	0.61	0.77	up
EPB41L1	chr20:34249195:34249377:+@chr20:34260824:34261234:+@chr20:34263608:34263712:+	0.25	0.32	0.37	0.13	0.15	0.22	0.166667	0.313333	0.22	0.37	0.13	0.25	up
EPB41L1	chr20:34257185:34259116:+@chr20:34259637:34259744:+@chr20:34260824:34261234:+	0.19	0.21	0.18	0.42	0.22	0.37	0.336667	0.193333	0.42	0.21	0.22	0.18	down
EPS15L1	chr19:16400572:16400513|16400509:-@chr19:16396894:16397127:-	0.25	0.38	0.41	0.13	0.12	0.13	0.126667	0.346667	0.13	0.41	0.12	0.25	up
ESRP1	chr8:95755712:95755910|95755898:+@chr8:95759607:95759775:+	0.75	0.62	0.65	0.48	0.49	0.52	0.496667	0.673333	0.52	0.75	0.48	0.62	up
FLNB	chr3:58099049:58099296:+@chr3:58102625:58102663:+@chr3:58103417:58103519:+	0.82	0.9	0.85	0.98	0.96	0.95	0.963333	0.856667	0.98	0.9	0.95	0.82	down
FN1	chr2:215955180:215955293:-@chr2:215953779:215954048:-@chr2:215952098:215952285:-	0.72	0.69	0.67	0.5	0.59	0.5	0.53	0.693333	0.59	0.72	0.5	0.67	up
FN1	chr2:215946290:215946379:-@chr2:215944877:215944983:-@chr2:215940831:215940995:-	0.55	0.42	0.42	0.28	0.27	0.17	0.24	0.463333	0.28	0.55	0.17	0.42	up
GALNT4	chr12:88443028:88443495:-@chr12:88409844:88410023:-@chr12:88385525:88385593:-	0.55	0.6	0.43	0.61	0.75	0.78	0.713333	0.526667	0.78	0.6	0.61	0.43	down
GALT	chr9:34637086:34637958|34637255:+@chr9:34638112:34638176:+	0.63	0.69	0.47	0.45	0.41	0.46	0.44	0.596667	0.46	0.69	0.41	0.47	up
GNB1L	chr22:18221966:18222409:-@chr22:18188751:18188898:-@chr22:18179808:18179970:-	0.65	0.66	0.71	0.51	0.41	0.56	0.493333	0.673333	0.56	0.71	0.41	0.65	up
GSN	chr9:123083569:123083661:+@chr9:123083974:123084052:+@chr9:123084538:123084649:+@chr9:123104070:123104266:+	0.64	0.45	0.33	0.31	0.27	0.25	0.276667	0.473333	0.31	0.64	0.25	0.33	up
GSN	chr9:123083925:123084052:+@chr9:123104023|123104070:123104266:+	0.78	0.72	0.77	0.54	0.54	0.69	0.59	0.756667	0.69	0.78	0.54	0.72	up
HDAC8	chrX:71704464:71704605:-@chrX:71631731:71631843:-@chrX:71627500:71627581:-	0.87	0.67	0.84	0.9	0.91	0.92	0.91	0.793333	0.92	0.87	0.9	0.67	down
HSPBAP1	chr3:123960761:123960897:-@chr3:123960309:123960390:-@chr3:123955953:123956968:-	0.23	0.29	0.28	0.08	0.11	0.11	0.1	0.266667	0.11	0.29	0.08	0.23	up
ICAM1	chr19:10256459:10256708|10256685:+@chr19:10256791:10259082:+	0.56	0.52	0.38	0.37	0.31	0.28	0.32	0.486667	0.37	0.56	0.28	0.38	up
ICAM4	chr19:10256459:10256708|10256685:+@chr19:10256791:10259082:+	0.56	0.52	0.38	0.37	0.31	0.28	0.32	0.486667	0.37	0.56	0.28	0.38	up
IP6K2	chr3:48707527:48708024:-@chr3:48707340:48707373:-@chr3:48706414:48706962:-	0.26	0.31	0.28	0.14	0.17	0.21	0.173333	0.283333	0.21	0.31	0.14	0.26	up
IRAK4	chr12:42448173:42448342:+@chr12:42451290:42451435:+@chr12:42452250:42452432:+	0.28	0.2	0.19	0.33	0.38	0.3	0.336667	0.223333	0.38	0.28	0.3	0.19	down
ITGA6	chr2:173070949:173071074:+@chr2:173074746:173074875:+@chr2:173077065:173079433:+	0.9	0.91	0.9	0.52	0.53	0.45	0.5	0.903333	0.53	0.91	0.45	0.9	up
KIAA0141	chr5:141294243:141294335:+@chr5:141296947:141297106:+@chr5:141298270:141301795:+	0.76	0.83	0.71	0.85	0.91	0.9	0.886667	0.766667	0.91	0.83	0.85	0.71	down
KIAA0391	chr14:34661511:34661867:+@chr14:34665692:34665739:+@chr14:34666436:34666568:+	0.3	0.56	0.58	0.76	0.71	0.62	0.696667	0.48	0.76	0.58	0.62	0.3	down
KIAA0391	chr14:34661511:34661867:+@chr14:34662462:34662713:+@chr14:34665692:34665739:+	0.77	0.67	0.45	0.83	0.79	0.83	0.816667	0.63	0.83	0.77	0.79	0.45	down
KIAA0391	chr14:34661511:34661867:+@chr14:34665692:34665739:+@chr14:34666436:34666568:+	0.3	0.56	0.58	0.76	0.71	0.62	0.696667	0.48	0.76	0.58	0.62	0.3	down
KIAA0391	chr14:34661511:34661867:+@chr14:34662462:34662713:+@chr14:34665692:34665739:+	0.77	0.67	0.45	0.83	0.79	0.83	0.816667	0.63	0.83	0.77	0.79	0.45	down
KIAA0895L	chr16:65773101:65773010|65772994:-@chr16:65771445:65772070:-	0.26	0.27	0.2	0.36	0.44	0.64	0.48	0.243333	0.64	0.27	0.36	0.2	down
KIAA0895L	chr16:65774666:65775444:-@chr16:65771519|65772070:65771445:-	0.7	0.78	0.64	0.87	0.79	0.83	0.83	0.706667	0.87	0.78	0.79	0.64	down
KIAA0907	chr1:154153914:154154087:-@chr1:154153124|154153152:154153040:-	0.44	0.5	0.48	0.58	0.61	0.59	0.593333	0.473333	0.61	0.5	0.58	0.44	down
KLK8	chr19:56196166:56196243:-@chr19:56192819:56192952:-@chr19:56190956:56191282:-	0.54	0.61	0.4	0.62	0.87	0.69	0.726667	0.516667	0.87	0.61	0.62	0.4	down
KLK9	chr19:56196166:56196243:-@chr19:56192819:56192952:-@chr19:56190956:56191282:-	0.54	0.61	0.4	0.62	0.87	0.69	0.726667	0.516667	0.87	0.61	0.62	0.4	down
LMO7	chr13:75276315:75276678:+@chr13:75281291:75281320:+@chr13:75289298:75289415:+	0.92	0.92	0.93	0.62	0.62	0.57	0.603333	0.923333	0.62	0.93	0.57	0.92	up
LOC102724993	chr16:14925863:14925996:+@chr16:14926459:14926547:+@chr16:14927091:14927234:+	0.22	0.12	0.12	0.26	0.36	0.35	0.323333	0.153333	0.36	0.22	0.26	0.12	down
LOC102724993	chr16:16329094:16329264:+@chr16:16329363:16329556:+	0.67	0.54	0.66	0.73	0.78	0.7	0.736667	0.623333	0.78	0.67	0.7	0.54	down
LOC400927-CSNK1E	chr22:37024737:37025155:-@chr22:37021339:37021399:-@chr22:37017891:37020486:-	0.59	0.51	0.54	0.49	0.35	0.35	0.396667	0.546667	0.49	0.59	0.35	0.51	up
LRRC14	chr8:145714563:145715007:+@chr8:145715807|145715893:145716246:+	0.45	0.35	0.38	0.63	0.64	0.62	0.63	0.393333	0.64	0.45	0.62	0.35	down
LSR	chr19:40441688:40441807:+@chr19:40444668:40444724:+@chr19:40445239:40445435:+@chr19:40449102:40449275:+	0.25	0.35	0.29	0.4	0.51	0.44	0.45	0.296667	0.51	0.35	0.4	0.25	down
MEIS2	chr15:34976121:34978603:-@chr15:34974733|34974754:34974644:-	0.69	0.74	0.65	0.52	0.44	0.51	0.49	0.693333	0.52	0.74	0.44	0.65	up
METTL15	chr11:28268329:28268520:+@chr11:28274876|28274920:28275054:+	0.79	0.75	0.72	0.68	0.62	0.63	0.643333	0.753333	0.68	0.79	0.62	0.72	up
MFSD10	chr4:2904631:2904734:-@chr4:2904125:2904320:-	0.48	0.5	0.57	0.43	0.47	0.29	0.396667	0.516667	0.47	0.57	0.29	0.48	up
MFSD10	chr4:2904627:2904734:-@chr4:2904125:2904283:-	0.52	0.47	0.53	0.37	0.41	0.31	0.363333	0.506667	0.41	0.53	0.31	0.47	up
MGRN1	chr16:4667465:4667574:+@chr16:4670034:4670099:+@chr16:4671552:4671778:+	0.74	0.79	0.7	0.58	0.67	0.63	0.626667	0.743333	0.67	0.79	0.58	0.7	up
MINK1	chr17:4737050:4737138:+@chr17:4737357:4737380:+@chr17:4737505:4737942:+	0.06	0.05	0.04	0.19	0.16	0.15	0.166667	0.05	0.19	0.06	0.15	0.04	down
MINK1	chr17:4737505:4737668:+@chr17:4738059|4738062:4738164:+	0.47	0.58	0.61	0.73	0.93	0.66	0.773333	0.553333	0.93	0.61	0.66	0.47	down
MIR7109	chr22:30346982:30347871:-@chr22:30346539:30346585:-@chr22:30344477:30345822:-	0.73	0.79	0.77	0.61	0.44	0.69	0.58	0.763333	0.69	0.79	0.44	0.73	up
MLST8	chr16:2195734:2195877:+@chr16:2196033|2196063:2196216:+	0.92	0.75	0.82	0.72	0.7	0.71	0.71	0.83	0.72	0.92	0.7	0.75	up
MROH6	chr8:144721865:144722199:-@chr8:144721455:144721574:-@chr8:144720924:144721201:-	0.69	0.65	0.84	0.51	0.64	0.52	0.556667	0.726667	0.64	0.84	0.51	0.65	up
MSLN	chr16:705585:705985:+@chr16:706934|706944:706993:+	0.72	0.78	0.59	0.86	0.87	0.89	0.873333	0.696667	0.89	0.78	0.86	0.59	down
MSLN	chr16:660457:660558:+@chr16:660697:660774:+@chr16:660893:661406:+	0.86	0.66	0.67	0.87	0.9	0.88	0.883333	0.73	0.9	0.86	0.87	0.66	down
MSLN	chr16:658657:658700:+@chr16:660124:660176:+	0.45	0.47	0.35	0.5	0.61	0.55	0.553333	0.423333	0.61	0.47	0.5	0.35	down
MSLN	chr16:718795:718896|718869:+@chr16:719010:719716:+	0.76	0.84	0.84	0.65	0.68	0.64	0.656667	0.813333	0.68	0.84	0.64	0.76	up
MTFR1L	chr1:26021608:26022206:+@chr1:26022316|26022424:26022517:+	0.86	0.78	0.88	0.72	0.71	0.65	0.693333	0.84	0.72	0.88	0.65	0.78	up
MYO18A	chr17:24437582:24437944:-@chr17:24436748:24436792:-@chr17:24433460:24433582:-	0.54	0.42	0.55	0.13	0.19	0.03	0.116667	0.503333	0.19	0.55	0.03	0.42	up
NDOR1	chr9:139230172:139230290:+@chr9:139230367:139230461:+@chr9:139230545:139233644:+	0.79	0.86	0.77	0.67	0.68	0.53	0.626667	0.806667	0.68	0.86	0.53	0.77	up
NDOR1	chr9:139228053:139228151:+@chr9:139228240:139228341:+@chr9:139228477:139228717:+	0.78	0.43	0.69	0.81	0.9	0.86	0.856667	0.633333	0.9	0.78	0.81	0.43	down
NDUFA3	chr19:59301053:59301130:+@chr19:59301930:59302137:+@chr19:59303559:59303845:+	0.68	0.67	0.69	0.89	0.75	0.81	0.816667	0.68	0.89	0.69	0.75	0.67	down
NDUFA3	chr19:59301053:59301130:+@chr19:59301930:59302089:+@chr19:59303559:59303845:+	0.76	0.72	0.75	0.95	0.8	0.85	0.866667	0.743333	0.95	0.76	0.8	0.72	down
NEIL1	chr15:73426344:73426867:+@chr15:73428278:73428733:+@chr15:73431718:73431781:+	0.68	0.7	0.77	0.49	0.34	0.58	0.47	0.716667	0.58	0.77	0.34	0.68	up
NPIPA2	chr16:16329094:16329264:+@chr16:16329363:16329556:+	0.67	0.54	0.66	0.73	0.78	0.7	0.736667	0.623333	0.78	0.67	0.7	0.54	down
NPIPA3	chr16:16329094:16329264:+@chr16:16329363:16329556:+	0.67	0.54	0.66	0.73	0.78	0.7	0.736667	0.623333	0.78	0.67	0.7	0.54	down
NPIPA5	chr16:16329094:16329264:+@chr16:16329363:16329556:+	0.67	0.54	0.66	0.73	0.78	0.7	0.736667	0.623333	0.78	0.67	0.7	0.54	down
NPIPA7	chr16:16329094:16329264:+@chr16:16329363:16329556:+	0.67	0.54	0.66	0.73	0.78	0.7	0.736667	0.623333	0.78	0.67	0.7	0.54	down
NPIPA8	chr16:16329094:16329264:+@chr16:16329363:16329556:+	0.67	0.54	0.66	0.73	0.78	0.7	0.736667	0.623333	0.78	0.67	0.7	0.54	down
NUBP2	chr16:1772895:1773038:+@chr16:1773879:1774068:+@chr16:1775641:1775904:+@chr16:1776539:1777833:+	0.39	0.61	0.38	0.63	0.69	0.69	0.67	0.46	0.69	0.61	0.63	0.38	down
ORMDL1	chr2:190357240:190357342:-@chr2:190355573|190356094:190355393:-	0.46	0.48	0.5	0.33	0.36	0.4	0.363333	0.48	0.4	0.5	0.33	0.46	up
OSBPL3	chr7:24869640:24869743:-@chr7:24869344:24869436:-@chr7:24867757:24867913:-	0.21	0.22	0.33	0.49	0.53	0.56	0.526667	0.253333	0.56	0.33	0.49	0.21	down
PBX3	chr9:127550436:127550723:+@chr9:127717786:127717887:+@chr9:127731755:127731945:+	0.21	0.11	0.23	0.52	0.26	0.32	0.366667	0.183333	0.52	0.23	0.26	0.11	down
PBX3	chr9:127550436:127550723:+@chr9:127717786:127718027:+@chr9:127731755:127731945:+	0.53	0.43	0.64	0.81	0.74	0.79	0.78	0.533333	0.81	0.64	0.74	0.43	down
PDLIM7	chr5:176852012:176852042:-@chr5:176851414:176851583:-@chr5:176850617:176851027:-	0.24	0.3	0.18	0.43	0.62	0.34	0.463333	0.24	0.62	0.3	0.34	0.18	down
PHKG2	chr16:30672216:30672379:+@chr16:30675189|30675412:30675537:+	0.77	0.85	0.76	0.75	0.56	0.68	0.663333	0.793333	0.75	0.85	0.56	0.76	up
PIGO	chr9:35082540:35082764:-@chr9:35081237:35081288:-	0.73	0.7	0.82	0.67	0.5	0.6	0.59	0.75	0.67	0.82	0.5	0.7	up
PISD	chr22:30346982:30347871:-@chr22:30346539:30346585:-@chr22:30344477:30345822:-	0.73	0.79	0.77	0.61	0.44	0.69	0.58	0.763333	0.69	0.79	0.44	0.73	up
POC1B	chr12:88443028:88443495:-@chr12:88409844:88410023:-@chr12:88385525:88385593:-	0.55	0.6	0.43	0.61	0.75	0.78	0.713333	0.526667	0.78	0.6	0.61	0.43	down
POC1B-GALNT4	chr12:88443028:88443495:-@chr12:88409844:88410023:-@chr12:88385525:88385593:-	0.55	0.6	0.43	0.61	0.75	0.78	0.713333	0.526667	0.78	0.6	0.61	0.43	down
POFUT2	chr21:45530021:45530271:-@chr21:45527695:45527870:-@chr21:45526692:45526802:-	0.77	0.81	0.68	0.91	0.92	0.82	0.883333	0.753333	0.92	0.81	0.82	0.68	down
POLB	chr8:42315129:42315360:+@chr8:42315687:42315744:+@chr8:42321628:42321694:+	0.48	0.54	0.51	0.72	0.61	0.76	0.696667	0.51	0.76	0.54	0.61	0.48	down
POMT1	chr9:133375111:133375270:+@chr9:133375468:133375623:+	0.7	0.89	0.89	0.64	0.69	0.57	0.633333	0.826667	0.69	0.89	0.57	0.7	up
PSMD4	chr1:149493801:149493908:+@chr1:149503014:149503132:+@chr1:149503932:149504334:+	0.28	0.17	0.29	0.67	0.58	0.52	0.59	0.246667	0.67	0.29	0.52	0.17	down
PXK	chr3:58373668:58373730:+@chr3:58381303:58381335:+@chr3:58384228:58384261:+@chr3:58385519:58386787:+	0.33	0.35	0.44	0.54	0.46	0.48	0.493333	0.373333	0.54	0.44	0.46	0.33	down
QTRT1	chr19:10683837:10684304|10683975:+@chr19:10684434:10684547:+	0.85	0.82	0.86	0.72	0.78	0.65	0.716667	0.843333	0.78	0.86	0.65	0.82	up
RABGGTB	chr1:76028225:76028330:+@chr1:76028425:76028547:+	0.53	0.59	0.67	0.35	0.46	0.46	0.423333	0.596667	0.46	0.67	0.35	0.53	up
RABGGTB	chr1:76024306:76024547:+@chr1:76024973:76025138:+@chr1:76025770:76028790:+	0.34	0.48	0.19	0.65	0.7	0.64	0.663333	0.336667	0.7	0.48	0.64	0.19	down
RAPGEF1	chr9:133487004:133487206:-@chr9:133469169:133469261:-@chr9:133467269:133467357:-	0.32	0.43	0.34	0.18	0.19	0.16	0.176667	0.363333	0.19	0.43	0.16	0.32	up
RBM10	chrX:46913658:46913841:+@chrX:46915371:46915601:+@chrX:46917471:46917540:+	0.46	0.52	0.42	0.62	0.61	0.6	0.61	0.466667	0.62	0.52	0.6	0.42	down
RBM5	chr3:50112969:50115603:+@chr3:50116685:50116745:+@chr3:50117514:50117579:+	0.32	0.38	0.24	0.54	0.47	0.41	0.473333	0.313333	0.54	0.38	0.41	0.24	down
RELL2	chr5:140997877:140998611:+@chr5:140998706:140998772:+@chr5:140999215:140999400:+	0.85	0.92	0.84	0.78	0.78	0.7	0.753333	0.87	0.78	0.92	0.7	0.84	up
RFX3	chr9:3320259:3320517:-@chr9:3291546:3291620:-@chr9:3283077:3283258:-	0.68	0.7	0.66	0.78	0.83	0.79	0.8	0.68	0.83	0.7	0.78	0.66	down
RHNO1	chr12:2856627:2856709:+@chr12:2864589|2864690:2864961:+	0.1	0.17	0.18	0.38	0.22	0.22	0.273333	0.15	0.38	0.18	0.22	0.1	down
RMND5B	chr5:177503234:177503334:+@chr5:177503549:177503715:+	0.58	0.28	0.38	0.18	0.17	0.18	0.176667	0.413333	0.18	0.58	0.17	0.28	up
RPS24	chr10:79466958:79467068|79467026:+@chr10:79469968:79469989:+	0.52	0.55	0.63	0.39	0.49	0.43	0.436667	0.566667	0.49	0.63	0.39	0.52	up
RUVBL2	chr19:54188561:54188992:+@chr19:54189845:54190002:+@chr19:54194388:54194442:+	0.29	0.43	0.54	0.55	0.76	0.62	0.643333	0.42	0.76	0.54	0.55	0.29	down
SFI1	chr22:30339588:30339841:+@chr22:30340775:30340846:+@chr22:30341034:30341265:+	0.75	0.62	0.62	0.85	0.8	0.79	0.813333	0.663333	0.85	0.75	0.79	0.62	down
SLC12A9	chr7:100288278:100288393:+@chr7:100289714:100289936:+@chr7:100292426:100292734:+	0.39	0.38	0.35	0.19	0.31	0.29	0.263333	0.373333	0.31	0.39	0.19	0.35	up
SLC25A22	chr11:786043:786367:-@chr11:785164|785169:784987:-	0.68	0.64	0.76	0.92	0.88	0.88	0.893333	0.693333	0.92	0.76	0.88	0.64	down
SLC37A4	chr11:118402857:118403015:-@chr11:118402426:118402608:-@chr11:118401887:118402000:-	0.6	0.66	0.6	0.71	0.71	0.79	0.736667	0.62	0.79	0.66	0.71	0.6	down
SLK	chr10:105757925:105758104:+@chr10:105760564:105760656:+@chr10:105767908:105768037:+	0.85	0.72	0.79	0.91	0.97	0.92	0.933333	0.786667	0.97	0.85	0.91	0.72	down
SNHG1	chr11:62377600:62377638:-@chr11:62377123:62377154:-	0.44	0.44	0.46	0.59	0.67	0.53	0.596667	0.446667	0.67	0.46	0.53	0.44	down
SYTL2	chr11:85107481:85108070:-@chr11:85103104:85103198:-@chr11:85099804:85099923:-	0.84	0.74	0.8	0.87	0.91	0.92	0.9	0.793333	0.92	0.84	0.87	0.74	down
SYTL3	chr6:159003770:159004398:+@chr6:159006407:159006633:+	0.14	0.07	0.1	0.21	0.19	0.24	0.213333	0.103333	0.24	0.14	0.19	0.07	down
TCF7L2	chr10:114909669:114909741:+@chr10:114910368:114910440:+@chr10:114911328:114911352:+@chr10:114915304:114917427:+	0.56	0.48	0.32	0.62	0.58	0.69	0.63	0.453333	0.69	0.56	0.58	0.32	down
TIAF1	chr17:24437582:24437944:-@chr17:24436748:24436792:-@chr17:24433460:24433582:-	0.54	0.42	0.55	0.13	0.19	0.03	0.116667	0.503333	0.19	0.55	0.03	0.42	up
TMEM143	chr19:53558360:53558742:-@chr19:53540229:53540394:-@chr19:53537599:53538520:-	0.79	0.79	0.75	0.73	0.72	0.54	0.663333	0.776667	0.73	0.79	0.54	0.75	up
TMEM175	chr4:916176:916328:+@chr4:931904:932403:+@chr4:934209:934306:+	0.31	0.34	0.32	0.42	0.75	0.49	0.553333	0.323333	0.75	0.34	0.42	0.31	down
TMEM175	chr4:931497:932403:+@chr4:934209|934212:934306:+	0.8	0.8	0.69	0.86	0.92	0.87	0.883333	0.763333	0.92	0.8	0.86	0.69	down
TMEM175	chr4:916176:916328:+@chr4:931497:931942:+@chr4:934209:934306:+	0.46	0.46	0.4	0.49	0.79	0.55	0.61	0.44	0.79	0.46	0.49	0.4	down
TMEM218	chr11:124477915:124477840|124477743:-@chr11:124477238:124477457:-	0.41	0.44	0.7	0.34	0.39	0.33	0.353333	0.516667	0.39	0.7	0.33	0.41	up
TMEM218	chr11:124477840:124478415:-@chr11:124477238:124477457:-@chr11:124476307:124476409:-	0.79	0.8	0.69	0.87	0.9	0.86	0.876667	0.76	0.9	0.8	0.86	0.69	down
TMEM25	chr11:117907118:117908386:+@chr11:117909015:117909132:+@chr11:117909782:117909812:+	0.27	0.33	0.51	0.23	0.21	0.25	0.23	0.37	0.25	0.51	0.21	0.27	up
TMEM25	chr11:117906579:117907159:+@chr11:117907700|117907703:117907796:+	0.32	0.47	0.34	0.48	0.62	0.63	0.576667	0.376667	0.63	0.47	0.48	0.32	down
TMEM39B	chr1:32313791:32314010:+@chr1:32314951:32315034:+@chr1:32315352:32315506:+	0.92	0.92	0.91	0.85	0.59	0.79	0.743333	0.916667	0.85	0.92	0.59	0.91	up
TMEM55B	chr14:19997439:19997389|19997387:-@chr14:19995852:19997295:-	0.52	0.61	0.58	0.47	0.36	0.38	0.403333	0.57	0.47	0.61	0.36	0.52	up
TRAPPC2L	chr16:87452528:87452698|87452661:+@chr16:87453572:87455010:+	0.86	0.87	0.63	0.91	0.89	0.91	0.903333	0.786667	0.91	0.87	0.89	0.63	down
TRAPPC2L	chr16:87453254:87453352:+@chr16:87453482:87453659:+	0.76	0.63	0.78	0.82	0.81	0.87	0.833333	0.723333	0.87	0.78	0.81	0.63	down
TRMT1	chr19:13088245:13087960|13087920:-@chr19:13087431:13087582:-	0.31	0.54	0.28	0.18	0.15	0.18	0.17	0.376667	0.18	0.54	0.15	0.28	up
TRMT1	chr19:13088245:13087960|13087920:-@chr19:13087093:13087280:-	0.39	0.73	0.33	0.18	0.25	0.21	0.213333	0.483333	0.25	0.73	0.18	0.33	up
TRMT1	chr19:13088245:13087960|13087811:-@chr19:13087431:13087582:-	0.67	0.61	0.57	0.34	0.37	0.54	0.416667	0.616667	0.54	0.67	0.34	0.57	up
TRMT1	chr19:13088467:13088926:-@chr19:13088154|13088245:13088001:-	0.93	0.94	0.96	0.83	0.8	0.79	0.806667	0.943333	0.83	0.96	0.79	0.93	up
TSPAN4	chr11:832808:832915:+@chr11:837201:837300:+@chr11:840288:840367:+	0.72	0.72	0.63	0.83	0.83	0.78	0.813333	0.69	0.83	0.72	0.78	0.63	down
TSPAN4	chr11:852550:854352|852741:+@chr11:854437:855825:+	0.53	0.57	0.7	0.44	0.42	0.35	0.403333	0.6	0.44	0.7	0.35	0.53	up
TTC28-AS1	chr22:26723399:26723727:+@chr22:26724592:26724826:+@chr22:26725418:26728667:+	0.59	0.2	0.55	0.73	0.71	0.6	0.68	0.446667	0.73	0.59	0.6	0.2	down
TUBA1A	chr12:47866657:47866883:-@chr12:47866360:47866502:-	0.11	0.06	0.1	0.35	0.24	0.18	0.256667	0.09	0.35	0.11	0.18	0.06	down
TUBA1A	chr12:47866661:47866883:-@chr12:47866360:47866502:-	0.11	0.05	0.14	0.34	0.25	0.16	0.25	0.1	0.34	0.14	0.16	0.05	down
TUBA1A	chr12:47866657:47866883:-@chr12:47866360:47866508:-	0.08	0.05	0.08	0.22	0.17	0.14	0.176667	0.07	0.22	0.08	0.14	0.05	down
TUBA1A	chr12:47866647:47866883:-@chr12:47866360:47866502:-	0.13	0.08	0.12	0.32	0.25	0.16	0.243333	0.11	0.32	0.13	0.16	0.08	down
TULP3	chr12:2856627:2856709:+@chr12:2864589|2864690:2864961:+	0.1	0.17	0.18	0.38	0.22	0.22	0.273333	0.15	0.38	0.18	0.22	0.1	down
UROD	chr1:45251853:45252050:+@chr1:45252698:45252835:+	0.62	0.73	0.76	0.54	0.42	0.48	0.48	0.703333	0.54	0.76	0.42	0.62	up
USO1	chr4:76933867:76934078:+@chr4:76935513:76935533:+@chr4:76939799:76939909:+	0.38	0.41	0.39	0.21	0.32	0.27	0.266667	0.393333	0.32	0.41	0.21	0.38	up
VPS28	chr8:145622217:145622399:-@chr8:145621874:145621963:-	0.36	0.44	0.59	0.35	0.31	0.26	0.306667	0.463333	0.35	0.59	0.26	0.36	up
WIPI2	chr7:5196342:5196650:+@chr7:5205794:5205815:+@chr7:5220692:5220861:+	0.43	0.57	0.67	0.73	0.7	0.81	0.746667	0.556667	0.81	0.67	0.7	0.43	down
WNK2	chr9:95070614:95070849:+@chr9:95070943:95071053:+@chr9:95090891:95091723:+	0.23	0.23	0.18	0.1	0.11	0.07	0.0933333	0.213333	0.11	0.23	0.07	0.18	up
ZBTB1	chr14:64047720:64047855:+@chr14:64053071:64053222:+@chr14:64057958:64063628:+	0.8	0.9	0.77	0.72	0.63	0.73	0.693333	0.823333	0.73	0.9	0.63	0.77	up
ZBTB17	chr1:16141611:16141820:-@chr1:16141502|16141523:16141413:-	0.4	0.35	0.35	0.15	0.19	0.06	0.133333	0.366667	0.19	0.4	0.06	0.35	up
ZC3H14	chr14:88138925:88139157|88139142:+@chr14:88143340:88143460:+	0.87	0.88	0.75	0.93	0.95	0.96	0.946667	0.833333	0.96	0.88	0.93	0.75	down
ZNF138	chr7:63912731:63912857:+@chr7:63928753:63928889:+@chr7:63929264:63932114:+	0.47	0.41	0.38	0.17	0.36	0.29	0.273333	0.42	0.36	0.47	0.17	0.38	up
ZNF195	chr11:3356844:3357027:-@chr11:3355423:3355706:-@chr11:3351383:3351462:-	0.58	0.78	0.78	0.41	0.54	0.56	0.503333	0.713333	0.56	0.78	0.41	0.58	up
ZNF266	chr19:9406784:9407233:-@chr19:9405786:9405911:-@chr19:9405344:9405462:-	0.12	0.27	0.27	0.51	0.3	0.43	0.413333	0.22	0.51	0.27	0.3	0.12	down
ZNF266	chr19:9406784:9407233:-@chr19:9405369:9405462:-@chr19:9391667:9391894:-	0.22	0.22	0.37	0.21	0.12	0.14	0.156667	0.27	0.21	0.37	0.12	0.22	up
ZNF266	chr19:9390975:9390893|9390727:-@chr19:9390438:9390571:-	0.52	0.67	0.63	0.72	0.77	0.78	0.756667	0.606667	0.78	0.67	0.72	0.52	down
ZNF397	chr18:31077114:31077255:+@chr18:31088194:31088364:+@chr18:31091890:31097204:+	0.33	0.48	0.41	0.23	0.24	0.27	0.246667	0.406667	0.27	0.48	0.23	0.33	up
ZSCAN31	chr6:28429618:28432026:-@chr6:28429074:28429238:-@chr6:28417502:28417551:-@chr6:28412546:28412699:-	0.63	0.58	0.46	0.25	0.35	0.26	0.286667	0.556667	0.35	0.63	0.25	0.46	up
ZSCAN31	chr6:28429618:28432026:-@chr6:28413512:28413649:-@chr6:28412546:28412699:-	0.36	0.31	0.38	0.18	0.22	0.3	0.233333	0.35	0.3	0.38	0.18	0.31	up
ZSCAN31	chr6:28429618:28432026:-@chr6:28417502:28417551:-@chr6:28413512:28413649:-	0.4	0.33	0.34	0.47	0.52	0.55	0.513333	0.356667	0.55	0.4	0.47	0.33	down

## Sheet: RBM47_OL_with_SW480
Supplementary File 2. List of alternative splicing targets both in RBM47 knocking down H358 line and SW480 EpCAMhi/lo , filtered by ΔPSI > 0.1
symbol	event_name	psi_H358_RBM47_KD_1	psi_H358_RBM47_KD_2	psi_H358_RBM47_KD_3	psi_H358_RBM47_WT_1	psi_H358_RBM47_WT_2	psi_H358_RBM47_WT_3	psi_mean_group1	psi_mean_group2	psi_max_group1	psi_max_group2	psi_min_group1	psi_min_group2	change_type
ACAD9	chr3:130081023:130081374:+@chr3:130086190|130086208:130086279:+	0.37	0.44	0.51	0.32	0.23	0.29	0.28	0.44	0.32	0.51	0.23	0.37	up
AKAP9	chr7:91507924:91508148:+@chr7:91509296:91509436:+@chr7:91509918:91510393:+	0.77	0.64	0.6	0.33	0.36	0.32	0.336667	0.67	0.36	0.77	0.32	0.6	up
ANAPC15	chr11:71499238:71499297:-@chr11:71498919|71498955:71498782:-	0.11	0.35	0.07	0.06	0.06	0.05	0.0566667	0.176667	0.06	0.35	0.05	0.07	up
AP1G1	chr16:70400167:70400506:-@chr16:70399909:70400081:-@chr16:70399026:70399554:-	0.35	0.5	0.37	0.51	0.6	0.57	0.56	0.406667	0.6	0.5	0.51	0.35	down
ARHGAP27	chr17:40835863:40835967:-@chr17:40834729:40834817:-@chr17:40830212:40831196:-	0.31	0.37	0.23	0.18	0.22	0.19	0.196667	0.303333	0.22	0.37	0.18	0.23	up
ATP11C	chrX:138647741:138647894:-@chrX:138647556:138647621:-@chrX:138642260:138642350:-@chrX:138636171:138638787:-	0.3	0.32	0.18	0.16	0.16	0.13	0.15	0.266667	0.16	0.32	0.13	0.18	up
ATP6V0E2	chr7:149203566:149203667:+@chr7:149206700:149206812:+@chr7:149207357:149208732:+	0.19	0.3	0.35	0.69	0.38	0.74	0.603333	0.28	0.74	0.35	0.38	0.19	down
ATP6V0E2	chr7:149203620:149203671|149203667:+@chr7:149206700:149207662:+	0.55	0.57	0.51	0.3	0.37	0.36	0.343333	0.543333	0.37	0.57	0.3	0.51	up
BAZ2B	chr2:159997514:159998908:-@chr2:159995752:159995913:-@chr2:159993957:159994017:-	0.85	0.8	0.83	0.7	0.73	0.74	0.723333	0.826667	0.74	0.85	0.7	0.8	up
BMP1	chr8:22110698:22110878:+@chr8:22114576|22115266:22115386:+	0.51	0.46	0.5	0.34	0.41	0.4	0.383333	0.49	0.41	0.51	0.34	0.46	up
CABYR	chr18:19984500:19984593|19984586:+@chr18:19989663:19990961:+	0.4	0.43	0.39	0.61	0.52	0.53	0.553333	0.406667	0.61	0.43	0.52	0.39	down
CARS2	chr13:110097449:110097587:-@chr13:110096315:110096438:-	0.33	0.13	0.24	0.11	0.12	0.12	0.116667	0.233333	0.12	0.33	0.11	0.13	up
CARS2	chr13:110101382:110101581:-@chr13:110098666:110099645:-@chr13:110096315:110097587:-	0.55	0.5	0.68	0.44	0.41	0.38	0.41	0.576667	0.44	0.68	0.38	0.5	up
CCDC14	chr3:125157583:125157652:-@chr3:125157380:125157502:-@chr3:125150921:125151024:-@chr3:125150401:125150669:-	0.67	0.8	0.83	0.59	0.56	0.6	0.583333	0.766667	0.6	0.83	0.56	0.67	up
CCNL1	chr3:158359349:158359962:-@chr3:158357490:158357566:-@chr3:158353223:158353639:-	0.42	0.54	0.53	0.66	0.62	0.68	0.653333	0.496667	0.68	0.54	0.62	0.42	down
CCNL1	chr3:158359349:158359962:-@chr3:158357494:158357566:-@chr3:158353223:158353639:-	0.7	0.66	0.74	0.85	0.81	0.82	0.826667	0.7	0.85	0.74	0.81	0.66	down
CD44	chr11:35167785:35168188:+@chr11:35179205:35179318:+@chr11:35182635:35182782:+	0.16	0.11	0.23	0.03	0.05	0.06	0.0466667	0.166667	0.06	0.23	0.03	0.11	up
CD44	chr11:35167785:35168188:+@chr11:35176244:35176369:+@chr11:35188088:35188177:+@chr11:35192975:35193037:+	0.93	0.92	0.93	0.79	0.83	0.86	0.826667	0.926667	0.86	0.93	0.79	0.92	up
CD46	chr1:206025587:206025650:+@chr1:206030221:206030313:+@chr1:206033487:206035484:+	0.44	0.45	0.45	0.31	0.3	0.35	0.32	0.446667	0.35	0.45	0.3	0.44	up
CD47	chr3:109252115:109252187:-@chr3:109251156:109251188:-@chr3:109244629:109248829:-	0.88	0.89	0.91	0.55	0.72	0.59	0.62	0.893333	0.72	0.91	0.55	0.88	up
CD47	chr3:109253476:109255521:-@chr3:109252115:109252139:-@chr3:109244629:109248829:-	0.09	0.11	0.06	0.45	0.47	0.4	0.44	0.0866667	0.47	0.11	0.4	0.06	down
CHFR	chr12:131940090:131940763:-@chr12:131938277:131938393:-@chr12:131935300:131935383:-	0.72	0.83	0.71	0.88	0.87	0.87	0.873333	0.753333	0.88	0.83	0.87	0.71	down
CHFR	chr12:131940090:131940763:-@chr12:131938277:131938396:-@chr12:131935300:131935383:-	0.75	0.66	0.7	0.86	0.82	0.84	0.84	0.703333	0.86	0.75	0.82	0.66	down
CLEC2D	chr12:9700431:9700560|9700512:+@chr12:9700784:9702285:+	0.63	0.54	0.63	0.34	0.52	0.41	0.423333	0.6	0.52	0.63	0.34	0.54	up
CLSTN1	chr1:9723739:9723905:-@chr1:9720143:9720199:-@chr1:9718530:9718687:-	0.55	0.57	0.6	0.06	0.08	0.07	0.07	0.573333	0.08	0.6	0.06	0.55	up
CORO7-PAM16	chr16:4333209:4334334:-@chr16:4331506|4331585:4331370:-	0.29	0.3	0.23	0.15	0.19	0.09	0.143333	0.273333	0.19	0.3	0.09	0.23	up
CREB3L4	chr1:152211844:152211936:+@chr1:152212072:152212178:+	0.13	0.17	0.18	0.08	0.03	0.06	0.0566667	0.16	0.08	0.18	0.03	0.13	up
CREM	chr10:35535829:35535985:+@chr10:35540188|35540590:35540764:+	0.7	0.73	0.71	0.87	0.84	0.86	0.856667	0.713333	0.87	0.73	0.84	0.7	down
CTNND1	chr11:57285810:57286094:+@chr11:57313085:57313203:+@chr11:57315433:57315721:+	0.06	0.06	0.07	0.15	0.21	0.15	0.17	0.0633333	0.21	0.07	0.15	0.06	down
CTNND1	chr11:57339439:57339548:+@chr11:57339963:57340049:+@chr11:57340345:57343233:+	0.01	0.01	0.02	0.21	0.19	0.2	0.2	0.0133333	0.21	0.02	0.19	0.01	down
DDX11	chr12:31133604:31133686:+@chr12:31134087:31134295:+	0.71	0.69	0.82	0.56	0.61	0.53	0.566667	0.74	0.61	0.82	0.53	0.69	up
DDX11	chr12:31147137:31147221:+@chr12:31147523:31147596:+@chr12:31147778:31148992:+	0.69	0.58	0.61	0.36	0.53	0.51	0.466667	0.626667	0.53	0.69	0.36	0.58	up
DDX11	chr12:31133245:31133352:+@chr12:31133604|31134087:31134295:+	0.65	0.82	0.77	0.63	0.56	0.64	0.61	0.746667	0.64	0.82	0.56	0.65	up
DESI1	chr22:40346702:40347017:-@chr22:40333212:40333281:-@chr22:40329994:40330103:-	0.49	0.56	0.53	0.59	0.71	0.59	0.63	0.526667	0.71	0.56	0.59	0.49	down
DFFB	chr1:3765142:3765268:+@chr1:3772067|3772236:3772424:+	0.39	0.31	0.38	0.24	0.28	0.1	0.206667	0.36	0.28	0.39	0.1	0.31	up
DPM1	chr20:48991975:48992144:-@chr20:48990809:48990899:-@chr20:48986092:48986206:-	0.8	0.69	0.78	0.89	0.85	0.87	0.87	0.756667	0.89	0.8	0.85	0.69	down
DPM1	chr20:48991975:48992144:-@chr20:48990809:48990902:-@chr20:48986092:48986206:-	0.83	0.75	0.73	0.89	0.87	0.88	0.88	0.77	0.89	0.83	0.87	0.73	down
DPP7	chr9:139128736:139128849:-@chr9:139128516:139128651:-	0.33	0.37	0.41	0.56	0.47	0.51	0.513333	0.37	0.56	0.41	0.47	0.33	down
DPP8	chr15:63567081:63567209:-@chr15:63564490:63564551:-@chr15:63553600:63553679:-@chr15:63546462:63546614:-	0.46	0.35	0.5	0.66	0.63	0.55	0.613333	0.436667	0.66	0.5	0.55	0.35	down
ECHDC2	chr1:53159813:53160179:-@chr1:53152155:53152355:-@chr1:53149983:53150050:-	0.65	0.67	0.61	0.57	0.46	0.43	0.486667	0.643333	0.57	0.67	0.43	0.61	up
EDRF1	chr10:127404241:127404397:+@chr10:127407562:127407663:+@chr10:127407917:127408038:+	0.55	0.3	0.52	0.8	0.63	0.79	0.74	0.456667	0.8	0.55	0.63	0.3	down
EIF2B5	chr3:185343534:185343624:+@chr3:185343924:185344047:+	0.56	0.38	0.43	0.21	0.18	0.18	0.19	0.456667	0.21	0.56	0.18	0.38	up
ELMOD3	chr2:85436189:85436406:+@chr2:85436504:85436530:+	0.81	0.82	0.75	0.7	0.72	0.63	0.683333	0.793333	0.72	0.82	0.63	0.75	up
ELMOD3	chr2:85435710:85435810:+@chr2:85437603:85437886:+	0.35	0.5	0.41	0.52	0.62	0.63	0.59	0.42	0.63	0.5	0.52	0.35	down
EP400	chr12:131030192:131030291:+@chr12:131031987:131032094:+@chr12:131032591:131033467:+	0.11	0.2	0.23	0.25	0.42	0.31	0.326667	0.18	0.42	0.23	0.25	0.11	down
ERC1	chr12:1089619:1089774:+@chr12:1091642:1091725:+@chr12:1095293:1095622:+	0.89	0.88	0.89	0.79	0.69	0.75	0.743333	0.886667	0.79	0.89	0.69	0.88	up
EXOC7	chr17:71602090:71602257:-@chr17:71598005:71598073:-@chr17:71596851:71596996:-	0.37	0.32	0.29	0.58	0.46	0.47	0.503333	0.326667	0.58	0.37	0.46	0.29	down
EXOC7	chr17:71598819:71598911:-@chr17:71598005:71598157:-@chr17:71596851:71596996:-	0.56	0.4	0.47	0.7	0.76	0.61	0.69	0.476667	0.76	0.56	0.61	0.4	down
FAM192A	chr16:55777234:55777477:-@chr16:55766952:55767003:-@chr16:55766033:55766101:-@chr16:55765141:55765282:-	0.25	0.17	0.35	0.55	0.41	0.37	0.443333	0.256667	0.55	0.35	0.37	0.17	down
FAM192A	chr16:55777234:55777477:-@chr16:55770219:55770265:-@chr16:55766033:55766101:-@chr16:55765141:55765282:-	0.36	0.23	0.3	0.41	0.43	0.39	0.41	0.296667	0.43	0.36	0.39	0.23	down
FAM192A	chr16:55777234:55777477:-@chr16:55769915:55769945:-@chr16:55766033:55766101:-@chr16:55765141:55765282:-	0.18	0.12	0.19	0.39	0.24	0.22	0.283333	0.163333	0.39	0.19	0.22	0.12	down
FAM219B	chr15:72985759:72985718|72985672:-@chr15:72984058:72984625:-	0.67	0.6	0.67	0.72	0.83	0.74	0.763333	0.646667	0.83	0.67	0.72	0.6	down
FLNB	chr3:58099049:58099296:+@chr3:58102625:58102663:+@chr3:58103417:58103519:+	0.82	0.9	0.85	0.98	0.96	0.95	0.963333	0.856667	0.98	0.9	0.95	0.82	down
FYN	chr6:112130781:112130930:-@chr6:112127411:112127566:-@chr6:112124173:112124352:-	0.25	0.55	0.47	0.6	0.6	0.65	0.616667	0.423333	0.65	0.55	0.6	0.25	down
FZD3	chr8:28407642:28407779:+@chr8:28413369:28413414:+@chr8:28416106:28416638:+	0.37	0.27	0.36	0.71	0.57	0.48	0.586667	0.333333	0.71	0.37	0.48	0.27	down
GAK	chr4:835538:835762:-@chr4:834724:834805:-	0.43	0.49	0.48	0.2	0.39	0.23	0.273333	0.466667	0.39	0.49	0.2	0.43	up
GALE	chr1:23997692:23997807:-@chr1:23997194:23997307:-	0.5	0.45	0.5	0.36	0.4	0.32	0.36	0.483333	0.4	0.5	0.32	0.45	up
GALNT4	chr12:88443028:88443495:-@chr12:88409844:88410023:-@chr12:88385525:88385593:-	0.55	0.6	0.43	0.61	0.75	0.78	0.713333	0.526667	0.78	0.6	0.61	0.43	down
GALT	chr9:34637086:34637958|34637255:+@chr9:34638112:34638176:+	0.63	0.69	0.47	0.45	0.41	0.46	0.44	0.596667	0.46	0.69	0.41	0.47	up
GAS5	chr1:172101967:172101938|172101934:-@chr1:172100848:172101655:-	0.3	0.32	0.3	0.4	0.45	0.42	0.423333	0.306667	0.45	0.32	0.4	0.3	down
GAS5	chr1:172100436:172100465:-@chr1:172100245:172100263:-	0.58	0.66	0.52	0.41	0.47	0.49	0.456667	0.586667	0.49	0.66	0.41	0.52	up
GAS5	chr1:172101271:172101308:-@chr1:172100990:172101043:-	0.38	0.35	0.49	0.5	0.52	0.51	0.51	0.406667	0.52	0.49	0.5	0.35	down
GSN	chr9:123083569:123083661:+@chr9:123083974:123084052:+@chr9:123084538:123084649:+@chr9:123104070:123104266:+	0.64	0.45	0.33	0.31	0.27	0.25	0.276667	0.473333	0.31	0.64	0.25	0.33	up
GSN	chr9:123083925:123084052:+@chr9:123104023|123104070:123104266:+	0.78	0.72	0.77	0.54	0.54	0.69	0.59	0.756667	0.69	0.78	0.54	0.72	up
IDH3A	chr15:76236305:76236559:+@chr15:76236945:76237028:+	0.63	0.53	0.37	0.25	0.33	0.3	0.293333	0.51	0.33	0.63	0.25	0.37	up
IDH3A	chr15:76236305:76236559:+@chr15:76236970:76237028:+	0.6	0.47	0.46	0.4	0.4	0.41	0.403333	0.51	0.41	0.6	0.4	0.46	up
IDH3A	chr15:76236305:76236559:+@chr15:76236945|76236970:76237028:+	0.45	0.38	0.54	0.81	0.65	0.69	0.716667	0.456667	0.81	0.54	0.65	0.38	down
INTS6L	chrX:134538784:134539018|134538886:+@chrX:134541379:134541753:+	0.58	0.51	0.43	0.69	0.61	0.61	0.636667	0.506667	0.69	0.58	0.61	0.43	down
ITGA6	chr2:173070949:173071074:+@chr2:173074746:173074875:+@chr2:173077065:173079433:+	0.9	0.91	0.9	0.52	0.53	0.45	0.5	0.903333	0.53	0.91	0.45	0.9	up
KIAA0754	chr1:39718057:39718268:+@chr1:39719179:39719289:+@chr1:39722860:39725246:+	0.43	0.43	0.44	0.74	0.71	0.73	0.726667	0.433333	0.74	0.44	0.71	0.43	down
KIAA0754	chr1:39668086:39668093:+@chr1:39668262:39668327:+	0.45	0.56	0.48	0.41	0.39	0.36	0.386667	0.496667	0.41	0.56	0.36	0.45	up
KIAA0895L	chr16:65774666:65775444:-@chr16:65771519|65772070:65771445:-	0.7	0.78	0.64	0.87	0.79	0.83	0.83	0.706667	0.87	0.78	0.79	0.64	down
KIAA0895L	chr16:65773101:65773010|65772994:-@chr16:65771445:65772070:-	0.26	0.27	0.2	0.36	0.44	0.64	0.48	0.243333	0.64	0.27	0.36	0.2	down
KIAA1841	chr2:61152245:61152431:+@chr2:61154097:61154190:+@chr2:61157559:61157797:+	0.46	0.58	0.55	0.66	0.62	0.67	0.65	0.53	0.67	0.58	0.62	0.46	down
LINC01184	chr5:127446326:127447337:-@chr5:127445782|127445785:127445564:-	0.53	0.47	0.53	0.54	0.83	0.7	0.69	0.51	0.83	0.53	0.54	0.47	down
LINC01184	chr5:127446561:127446907:-@chr5:127445564:127445782:-@chr5:127424735:127424835:-	0.39	0.36	0.53	0.63	0.59	0.64	0.62	0.426667	0.64	0.53	0.59	0.36	down
LOC100507557	chr6:146191190:146191285:+@chr6:146244408:146244477:+@chr6:146246034:146249878:+	0.44	0.43	0.34	0.22	0.28	0.25	0.25	0.403333	0.28	0.44	0.22	0.34	up
LOC102724993	chr16:16329094:16329264:+@chr16:16329363:16329556:+	0.67	0.54	0.66	0.73	0.78	0.7	0.736667	0.623333	0.78	0.67	0.7	0.54	down
LOC102724993	chr16:14925863:14925996:+@chr16:14926459:14926547:+@chr16:14927091:14927234:+	0.22	0.12	0.12	0.26	0.36	0.35	0.323333	0.153333	0.36	0.22	0.26	0.12	down
LOC374443	chr12:9700431:9700560|9700512:+@chr12:9700784:9702285:+	0.63	0.54	0.63	0.34	0.52	0.41	0.423333	0.6	0.52	0.63	0.34	0.54	up
LRRC14	chr8:145714563:145715007:+@chr8:145715807|145715893:145716246:+	0.45	0.35	0.38	0.63	0.64	0.62	0.63	0.393333	0.64	0.45	0.62	0.35	down
LSR	chr19:40441688:40441807:+@chr19:40444668:40444724:+@chr19:40445239:40445435:+@chr19:40449102:40449275:+	0.25	0.35	0.29	0.4	0.51	0.44	0.45	0.296667	0.51	0.35	0.4	0.25	down
MACF1	chr1:39718057:39718268:+@chr1:39719179:39719289:+@chr1:39722860:39725246:+	0.43	0.43	0.44	0.74	0.71	0.73	0.726667	0.433333	0.74	0.44	0.71	0.43	down
MACF1	chr1:39668086:39668093:+@chr1:39668262:39668327:+	0.45	0.56	0.48	0.41	0.39	0.36	0.386667	0.496667	0.41	0.56	0.36	0.45	up
MOK	chr14:101768625:101769879:-@chr14:101767797:101767911:-@chr14:101764927:101765747:-	0.57	0.51	0.71	0.82	0.76	0.77	0.783333	0.596667	0.82	0.71	0.76	0.51	down
MOSPD1	chrX:133860976:133861230:-@chrX:133860765:133860861:-@chrX:133858055:133858730:-	0.78	0.67	0.65	0.79	0.86	0.88	0.843333	0.7	0.88	0.78	0.79	0.65	down
MYL6	chr12:54840294:54840371:+@chr12:54840677:54840721:+@chr12:54841438:54841633:+	0.37	0.43	0.46	0.14	0.14	0.16	0.146667	0.42	0.16	0.46	0.14	0.37	up
MYL6	chr12:54838735:54838766|54838762:+@chr12:54839640:54839781:+	0.41	0.49	0.44	0.32	0.37	0.33	0.34	0.446667	0.37	0.49	0.32	0.41	up
MYO18A	chr17:24437582:24437944:-@chr17:24436748:24436792:-@chr17:24433460:24433582:-	0.54	0.42	0.55	0.13	0.19	0.03	0.116667	0.503333	0.19	0.55	0.03	0.42	up
NAGK	chr2:71156193:71156280:+@chr2:71157242:71157339:+	0.17	0.17	0.72	0.14	0.13	0.07	0.113333	0.353333	0.14	0.72	0.07	0.17	up
NFKB1	chr4:103723061:103723152:+@chr4:103724877|103724949:103725015:+	0.76	0.76	0.79	0.91	0.86	0.86	0.876667	0.77	0.91	0.79	0.86	0.76	down
NPIPA1	chr16:14925863:14925996:+@chr16:14926459:14926547:+@chr16:14927091:14927234:+	0.22	0.12	0.12	0.26	0.36	0.35	0.323333	0.153333	0.36	0.22	0.26	0.12	down
NPIPA2	chr16:16329094:16329264:+@chr16:16329363:16329556:+	0.67	0.54	0.66	0.73	0.78	0.7	0.736667	0.623333	0.78	0.67	0.7	0.54	down
NPIPA3	chr16:16329094:16329264:+@chr16:16329363:16329556:+	0.67	0.54	0.66	0.73	0.78	0.7	0.736667	0.623333	0.78	0.67	0.7	0.54	down
NPIPA5	chr16:16329094:16329264:+@chr16:16329363:16329556:+	0.67	0.54	0.66	0.73	0.78	0.7	0.736667	0.623333	0.78	0.67	0.7	0.54	down
NPIPA7	chr16:16329094:16329264:+@chr16:16329363:16329556:+	0.67	0.54	0.66	0.73	0.78	0.7	0.736667	0.623333	0.78	0.67	0.7	0.54	down
NPIPA8	chr16:16329094:16329264:+@chr16:16329363:16329556:+	0.67	0.54	0.66	0.73	0.78	0.7	0.736667	0.623333	0.78	0.67	0.7	0.54	down
NRF1	chr7:129038791:129038901:+@chr7:129084419|129084422:129084650:+	0.52	0.45	0.57	0.7	0.69	0.77	0.72	0.513333	0.77	0.57	0.69	0.45	down
NT5C	chr17:70638795:70638747|70638655:-@chr17:70637915:70638557:-	0.36	0.25	0.29	0.17	0.19	0.14	0.166667	0.3	0.19	0.36	0.14	0.25	up
NT5C	chr17:70638971:70638735|70638655:-@chr17:70637915:70638557:-	0.35	0.26	0.31	0.18	0.23	0.18	0.196667	0.306667	0.23	0.35	0.18	0.26	up
ORMDL1	chr2:190357240:190357342:-@chr2:190355573|190356094:190355393:-	0.46	0.48	0.5	0.33	0.36	0.4	0.363333	0.48	0.4	0.5	0.33	0.46	up
PAM16	chr16:4333209:4334334:-@chr16:4331506|4331585:4331370:-	0.29	0.3	0.23	0.15	0.19	0.09	0.143333	0.273333	0.19	0.3	0.09	0.23	up
PCGF3	chr4:714741:714899:+@chr4:716189|716233:716287:+	0.63	0.54	0.61	0.83	0.75	0.91	0.83	0.593333	0.91	0.63	0.75	0.54	down
PDLIM7	chr5:176852012:176852042:-@chr5:176851414:176851583:-@chr5:176850617:176851027:-	0.24	0.3	0.18	0.43	0.62	0.34	0.463333	0.24	0.62	0.3	0.34	0.18	down
PITRM1	chr10:3176484:3176558:-@chr10:3175581:3175693:-	0.17	0.2	0.19	0.09	0.06	0.07	0.0733333	0.186667	0.09	0.2	0.06	0.17	up
POC1B	chr12:88443028:88443495:-@chr12:88409844:88410023:-@chr12:88385525:88385593:-	0.55	0.6	0.43	0.61	0.75	0.78	0.713333	0.526667	0.78	0.6	0.61	0.43	down
POC1B-GALNT4	chr12:88443028:88443495:-@chr12:88409844:88410023:-@chr12:88385525:88385593:-	0.55	0.6	0.43	0.61	0.75	0.78	0.713333	0.526667	0.78	0.6	0.61	0.43	down
POMT1	chr9:133375111:133375270:+@chr9:133375468:133375623:+	0.7	0.89	0.89	0.64	0.69	0.57	0.633333	0.826667	0.69	0.89	0.57	0.7	up
PREPL	chr2:44442167:44442504:-@chr2:44440140:44440239:-@chr2:44426911:44427033:-	0.54	0.37	0.52	0.67	0.62	0.55	0.613333	0.476667	0.67	0.54	0.55	0.37	down
PXN	chr12:119137746:119137847:-@chr12:119137459|119137603:119137289:-	0.89	0.9	0.91	0.66	0.8	0.84	0.766667	0.9	0.84	0.91	0.66	0.89	up
RABGGTB	chr1:76028225:76028330:+@chr1:76028425:76028547:+	0.53	0.59	0.67	0.35	0.46	0.46	0.423333	0.596667	0.46	0.67	0.35	0.53	up
RABGGTB	chr1:76024306:76024547:+@chr1:76024973:76025138:+@chr1:76025770:76028790:+	0.34	0.48	0.19	0.65	0.7	0.64	0.663333	0.336667	0.7	0.48	0.64	0.19	down
RBAK	chr7:4982458:4982593:+@chr7:4991067:4991232:+@chr7:5002767:5004870:+	0.58	0.34	0.36	0.25	0.23	0.16	0.213333	0.426667	0.25	0.58	0.16	0.34	up
RNF167	chr17:4784048:4784270:+@chr17:4784527:4784766:+@chr17:4784913:4785033:+	0.83	0.84	0.87	0.72	0.82	0.63	0.723333	0.846667	0.82	0.87	0.63	0.83	up
RNF167	chr17:4787108:4787559:+@chr17:4788598|4788601:4788678:+	0.84	0.84	0.54	0.85	0.92	0.92	0.896667	0.74	0.92	0.84	0.85	0.54	down
RNF216P1	chr7:4982458:4982593:+@chr7:4991067:4991232:+@chr7:5002767:5004870:+	0.58	0.34	0.36	0.25	0.23	0.16	0.213333	0.426667	0.25	0.58	0.16	0.34	up
RPS24	chr10:79466958:79467068|79467026:+@chr10:79469968:79469989:+	0.52	0.55	0.63	0.39	0.49	0.43	0.436667	0.566667	0.49	0.63	0.39	0.52	up
SAT1	chrX:23711211:23711747:+@chrX:23711838:23712441:+@chrX:23713366:23713467:+	0.97	0.97	0.96	0.82	0.84	0.76	0.806667	0.966667	0.84	0.97	0.76	0.96	up
SAT1	chrX:23711211:23711747:+@chrX:23711838:23712129:+@chrX:23713366:23713467:+	0.62	0.65	0.74	0.47	0.52	0.46	0.483333	0.67	0.52	0.74	0.46	0.62	up
SAT1	chrX:23711211:23711747:+@chrX:23711838:23711965:+@chrX:23713366:23713467:+	0.5	0.52	0.68	0.4	0.46	0.39	0.416667	0.566667	0.46	0.68	0.39	0.5	up
SAT1	chrX:23711838:23711921:+@chrX:23712332:23712441:+	0.48	0.52	0.47	0.39	0.35	0.4	0.38	0.49	0.4	0.52	0.35	0.47	up
SCARB1	chr12:123837002:123836923|123836856:-@chr12:123828127:123829085:-	0.5	0.49	0.63	0.36	0.46	0.22	0.346667	0.54	0.46	0.63	0.22	0.49	up
SEC24D	chr4:119965223:119965352:-@chr4:119957936:119958015:-@chr4:119956054:119956329:-	0.72	0.69	0.65	0.82	0.88	0.79	0.83	0.686667	0.88	0.72	0.79	0.65	down
SLC2A8	chr9:129206059:129206167:+@chr9:129206918:129207091:+@chr9:129209212:129209998:+	0.5	0.49	0.34	0.74	0.8	0.78	0.773333	0.443333	0.8	0.5	0.74	0.34	down
SLC37A4	chr11:118402857:118403015:-@chr11:118402426:118402608:-@chr11:118401887:118402000:-	0.6	0.66	0.6	0.71	0.71	0.79	0.736667	0.62	0.79	0.66	0.71	0.6	down
SLK	chr10:105757925:105758104:+@chr10:105760564:105760656:+@chr10:105767908:105768037:+	0.85	0.72	0.79	0.91	0.97	0.92	0.933333	0.786667	0.97	0.85	0.91	0.72	down
SLMAP	chr3:57825315:57825483:+@chr3:57832403:57832465:+@chr3:57850808:57850867:+	0.34	0.41	0.45	0.13	0.23	0.18	0.18	0.4	0.23	0.45	0.13	0.34	up
SRSF10	chr1:24176988:24177350:-@chr1:24174147|24174157:24174051:-	0.65	0.7	0.47	0.74	0.83	0.71	0.76	0.606667	0.83	0.7	0.71	0.47	down
TBC1D25	chrX:48282951:48283252:+@chrX:48284617:48284774:+@chrX:48302229:48302678:+	0.34	0.55	0.45	0.56	0.71	0.61	0.626667	0.446667	0.71	0.55	0.56	0.34	down
TBC1D25	chrX:48282951:48283252:+@chrX:48284665:48284774:+@chrX:48302229:48302678:+	0.78	0.81	0.78	0.93	0.89	0.88	0.9	0.79	0.93	0.81	0.88	0.78	down
TBC1D25	chrX:48282951:48283252:+@chrX:48284665:48284845:+@chrX:48302229:48302678:+	0.73	0.72	0.72	0.93	0.81	0.76	0.833333	0.723333	0.93	0.73	0.76	0.72	down
TBC1D5	chr3:18455061:18455268:-@chr3:18453285:18453367:-@chr3:18437181:18437487:-	0.21	0.4	0.35	0.17	0.17	0.2	0.18	0.32	0.2	0.4	0.17	0.21	up
TBRG1	chr11:123997953:124001009:+@chr11:124001919|124002010:124002156:+	0.19	0.28	0.26	0.34	0.44	0.29	0.356667	0.243333	0.44	0.28	0.29	0.19	down
TCF7L2	chr10:114909669:114909741:+@chr10:114910368:114910440:+@chr10:114911328:114911352:+@chr10:114915304:114917427:+	0.56	0.48	0.32	0.62	0.58	0.69	0.63	0.453333	0.69	0.56	0.58	0.32	down
THOC1	chr18:214924:215403:-@chr18:214179|214200:214084:-	0.15	0.21	0.2	0.28	0.36	0.35	0.33	0.186667	0.36	0.21	0.28	0.15	down
TIAF1	chr17:24437582:24437944:-@chr17:24436748:24436792:-@chr17:24433460:24433582:-	0.54	0.42	0.55	0.13	0.19	0.03	0.116667	0.503333	0.19	0.55	0.03	0.42	up
TOM1	chr22:34043870:34043954:+@chr22:34047952:34048012:+@chr22:34049021:34049623:+	0.68	0.78	0.73	0.86	0.82	0.86	0.846667	0.73	0.86	0.78	0.82	0.68	down
TRAPPC2L	chr16:87452528:87452698|87452661:+@chr16:87453572:87455010:+	0.86	0.87	0.63	0.91	0.89	0.91	0.903333	0.786667	0.91	0.87	0.89	0.63	down
TRAPPC2L	chr16:87453254:87453352:+@chr16:87453482:87453659:+	0.76	0.63	0.78	0.82	0.81	0.87	0.833333	0.723333	0.87	0.78	0.81	0.63	down
TRMT1	chr19:13088245:13087960|13087811:-@chr19:13087431:13087582:-	0.67	0.61	0.57	0.34	0.37	0.54	0.416667	0.616667	0.54	0.67	0.34	0.57	up
TRMT1	chr19:13088245:13087960|13087920:-@chr19:13087093:13087280:-	0.39	0.73	0.33	0.18	0.25	0.21	0.213333	0.483333	0.25	0.73	0.18	0.33	up
TRMT1	chr19:13088467:13088926:-@chr19:13088154|13088245:13088001:-	0.93	0.94	0.96	0.83	0.8	0.79	0.806667	0.943333	0.83	0.96	0.79	0.93	up
TRMT1	chr19:13088245:13087960|13087920:-@chr19:13087431:13087582:-	0.31	0.54	0.28	0.18	0.15	0.18	0.17	0.376667	0.18	0.54	0.15	0.28	up
TRMT2B	chrX:100193462:100193760:-@chrX:100179562:100179696:-@chrX:100178619:100178718:-	0.2	0.27	0.32	0.33	0.34	0.51	0.393333	0.263333	0.51	0.32	0.33	0.2	down
TRMT2B	chrX:100183957:100183843|100183687:-@chrX:100182962:100183016:-	0.61	0.71	0.7	0.83	0.73	0.8	0.786667	0.673333	0.83	0.71	0.73	0.61	down
TRMT2B	chrX:100193462:100193760:-@chrX:100178619:100178718:-@chrX:100177258:100177328:-	0.16	0.12	0.2	0.33	0.25	0.22	0.266667	0.16	0.33	0.2	0.22	0.12	down
TRMT61B	chr2:28945949:28946780:-@chr2:28937488:28937678:-@chr2:28928778:28928869:-	0.83	0.5	0.65	0.43	0.47	0.44	0.446667	0.66	0.47	0.83	0.43	0.5	up
TUBA1A	chr12:47866647:47866883:-@chr12:47866360:47866502:-	0.13	0.08	0.12	0.32	0.25	0.16	0.243333	0.11	0.32	0.13	0.16	0.08	down
TUBA1A	chr12:47866657:47866883:-@chr12:47866360:47866508:-	0.08	0.05	0.08	0.22	0.17	0.14	0.176667	0.07	0.22	0.08	0.14	0.05	down
TUBA1A	chr12:47866657:47866883:-@chr12:47866360:47866502:-	0.11	0.06	0.1	0.35	0.24	0.18	0.256667	0.09	0.35	0.11	0.18	0.06	down
TUBA1A	chr12:47866661:47866883:-@chr12:47866360:47866502:-	0.11	0.05	0.14	0.34	0.25	0.16	0.25	0.1	0.34	0.14	0.16	0.05	down
TYMP	chr22:49315199:49315855:-@chr22:49314791:49314910:-@chr22:49312728:49313012:-	0.34	0.32	0.28	0.44	0.69	0.45	0.526667	0.313333	0.69	0.34	0.44	0.28	down
USO1	chr4:76933867:76934078:+@chr4:76935513:76935533:+@chr4:76939799:76939909:+	0.38	0.41	0.39	0.21	0.32	0.27	0.266667	0.393333	0.32	0.41	0.21	0.38	up
USP19	chr3:49130384:49130557:-@chr3:49130222|49130267:49130094:-	0.65	0.65	0.73	0.64	0.52	0.52	0.56	0.676667	0.64	0.73	0.52	0.65	up
VPS28	chr8:145622217:145622399:-@chr8:145621874:145621963:-	0.36	0.44	0.59	0.35	0.31	0.26	0.306667	0.463333	0.35	0.59	0.26	0.36	up
ZFAND2B	chr2:219781222:219781452:+@chr2:219781538:219782613:+	0.48	0.41	0.56	0.37	0.29	0.36	0.34	0.483333	0.37	0.56	0.29	0.41	up
ZFYVE27	chr10:99501123:99501209:+@chr10:99502604:99502624:+@chr10:99502785:99507058:+	0.19	0.2	0.12	0.36	0.43	0.3	0.363333	0.17	0.43	0.2	0.3	0.12	down
ZNF765	chr19:58593008:58593095:+@chr19:58597130:58597256:+@chr19:58602763:58607074:+	0.48	0.36	0.43	0.59	0.49	0.68	0.586667	0.423333	0.68	0.48	0.49	0.36	down

## Sheet: QKI_OL_with_HCT116
Supplementary File 2. List of alternative splicing targets both in QKI knocking down CAL27 line and HCT116 EpCAMhi/lo , filtered by ΔPSI > 0.1
symbol	event_name	psi_CAL27_QKI_KD_1	psi_CAL27_QKI_KD_2	psi_CAL27_QKI_KD_3	psi_CAL27_WT_1	psi_CAL27_WT_2	psi_CAL27_WT_3	psi_mean_group1	psi_mean_group2	psi_max_group1	psi_max_group2	psi_min_group1	psi_min_group2	change_type
ABCD4	chr14:73839331:73839520:-@chr14:73836004:73836131:-@chr14:73834095:73834525:-	0.8	0.78	0.79	0.88	0.9	0.91	0.896667	0.79	0.91	0.8	0.88	0.78	down
ABHD8	chr19:17275051:17275282:-@chr19:17273992:17274041:-@chr19:17272262:17273433:-	0.07	0.06	0.05	0.3	0.09	0.13	0.173333	0.06	0.3	0.07	0.09	0.05	down
ABI1	chr10:27094153:27094253:-@chr10:27087997:27088170:-@chr10:27084590:27084676:-	0.85	0.69	0.68	0.66	0.64	0.58	0.626667	0.74	0.66	0.85	0.58	0.68	up
ACAA1	chr3:38143005:38143195:-@chr3:38142657:38142836:-@chr3:38142321:38142376:-	0.8	0.89	0.79	0.68	0.59	0.74	0.67	0.826667	0.74	0.89	0.59	0.79	up
ACAA1	chr3:38143195:38143005|38142657:-@chr3:38142321:38142376:-	0.42	0.5	0.46	0.39	0.27	0.27	0.31	0.46	0.39	0.5	0.27	0.42	up
ACAD9	chr3:130081024:130081550:+@chr3:130086186|130086190:130086279:+	0.86	0.76	0.67	0.58	0.62	0.43	0.543333	0.763333	0.62	0.86	0.43	0.67	up
ACSF2	chr17:45894780:45894945:+@chr17:45895516|45895586:45895611:+	0.84	0.82	0.84	0.7	0.65	0.52	0.623333	0.833333	0.7	0.84	0.52	0.82	up
ACSF2	chr17:45894544:45894677|45894662:+@chr17:45894780:45895400:+	0.11	0.08	0.04	0.19	0.15	0.29	0.21	0.0766667	0.29	0.11	0.15	0.04	down
ACYP1	chr14:74599926:74600017:-@chr14:74592903:74593016:-@chr14:74589677:74590115:-	0.08	0.08	0.11	0.31	0.2	0.26	0.256667	0.09	0.31	0.11	0.2	0.08	down
ACYP1	chr14:74599926:74600017:-@chr14:74598140:74598218:-@chr14:74589677:74590115:-	0.24	0.33	0.3	0.43	0.5	0.49	0.473333	0.29	0.5	0.33	0.43	0.24	down
AKNAD1	chr1:109307506:109307693:-@chr1:109306454:109306614:-@chr1:109294454:109294593:-	0.61	0.44	0.42	0.21	0.31	0.37	0.296667	0.49	0.37	0.61	0.21	0.42	up
AMD1	chr6:111302680:111303111:+@chr6:111316753:111316879:+@chr6:111318150:111318252:+	0.68	0.65	0.64	0.53	0.63	0.5	0.553333	0.656667	0.63	0.68	0.5	0.64	up
ANAPC5	chr12:120240687:120240794:-@chr12:120240463:120240590:-	0.48	0.5	0.4	0.84	0.63	0.63	0.7	0.46	0.84	0.5	0.63	0.4	down
ANKZF1	chr2:219806045:219806157:+@chr2:219806252|219806255:219806399:+	0.9	0.91	0.88	0.78	0.78	0.66	0.74	0.896667	0.78	0.91	0.66	0.88	up
AP1G2	chr14:23102429:23102687:-@chr14:23101553:23101642:-	0.22	0.12	0.14	0.24	0.33	0.25	0.273333	0.16	0.33	0.22	0.24	0.12	down
AP1G2	chr14:23102765:23103270:-@chr14:23102658|23102687:23102633:-	0.86	0.7	0.87	0.92	0.94	0.92	0.926667	0.81	0.94	0.87	0.92	0.7	down
AP1G2	chr14:23105113:23105209:-@chr14:23104865:23104941:-	0.57	0.59	0.32	0.13	0.18	0.13	0.146667	0.493333	0.18	0.59	0.13	0.32	up
APITD1-CORT	chr1:10413373:10414045:+@chr1:10416486:10416609:+@chr1:10417301:10417334:+	0.51	0.68	0.6	0.83	0.71	0.77	0.77	0.596667	0.83	0.68	0.71	0.51	down
ARHGAP17	chr16:24849606:24850226:-@chr16:24846506:24846554:-@chr16:24838203:24839082:-	0.68	0.69	0.62	0.53	0.36	0.42	0.436667	0.663333	0.53	0.69	0.36	0.62	up
ARHGAP17	chr16:24860809:24860965:-@chr16:24858186:24858419:-@chr16:24854292:24854461:-	0.24	0.24	0.29	0.59	0.48	0.54	0.536667	0.256667	0.59	0.29	0.48	0.24	down
ARMC6	chr19:19005384:19005739:+@chr19:19005940:19006047:+@chr19:19009361:19009516:+	0.49	0.43	0.43	0.86	0.71	0.89	0.82	0.45	0.89	0.49	0.71	0.43	down
ARRDC1	chr9:139627888:139627937:+@chr9:139628210:139628487:+	0.43	0.76	0.73	0.81	0.84	0.79	0.813333	0.64	0.84	0.76	0.79	0.43	down
ARRDC1	chr9:139627169:139627279:+@chr9:139627733:139627783:+	0.5	0.58	0.31	0.6	0.59	0.72	0.636667	0.463333	0.72	0.58	0.59	0.31	down
ASAH1	chr8:17964212:17964125|17964068:-@chr8:17963475:17963529:-	0.83	0.79	0.82	0.6	0.72	0.69	0.67	0.813333	0.72	0.83	0.6	0.79	up
ASAH1	chr8:17964212:17964068|17964037:-@chr8:17963475:17963529:-	0.19	0.24	0.23	0.45	0.36	0.34	0.383333	0.22	0.45	0.24	0.34	0.19	down
ATP2C1	chr3:132095503:132095871:+@chr3:132096124|132096242:132096309:+	0.5	0.56	0.66	0.48	0.42	0.42	0.44	0.573333	0.48	0.66	0.42	0.5	up
ATP9B	chr18:75234886:75235089:+@chr18:75236382:75236414:+@chr18:75238235:75239274:+	0.45	0.61	0.34	0.16	0.11	0.18	0.15	0.466667	0.18	0.61	0.11	0.34	up
AUP1	chr2:74608883:74608956:-@chr2:74608575:74608641:-	0.71	0.14	0.31	0.11	0.07	0.12	0.1	0.386667	0.12	0.71	0.07	0.14	up
AURKB	chr17:8051345:8051410:-@chr17:8050793:8050883:-	0.67	0.66	0.68	0.79	0.83	0.79	0.803333	0.67	0.83	0.68	0.79	0.66	down
B3GALNT1	chr3:162303909:162303999:-@chr3:162303595:162303687:-@chr3:162301550:162301715:-	0.25	0.12	0.25	0.3	0.35	0.41	0.353333	0.206667	0.41	0.25	0.3	0.12	down
BABAM1	chr19:17239159:17239336:+@chr19:17240565|17240603:17240900:+	0.33	0.4	0.33	0.28	0.25	0.2	0.243333	0.353333	0.28	0.4	0.2	0.33	up
BABAM1	chr19:17239159:17239336:+@chr19:17240449|17240611:17240900:+	0.39	0.48	0.4	0.35	0.31	0.31	0.323333	0.423333	0.35	0.48	0.31	0.39	up
BCS1L	chr2:219232623:219232710:+@chr2:219233004:219233133:+@chr2:219233906:219234487:+	0.44	0.38	0.27	0.49	0.54	0.45	0.493333	0.363333	0.54	0.44	0.45	0.27	down
BDP1	chr5:70893857:70894103:+@chr5:70894358:70894478:+@chr5:70896337:70899408:+	0.47	0.46	0.42	0.33	0.17	0.21	0.236667	0.45	0.33	0.47	0.17	0.42	up
BICD2	chr9:94517356:94517566:-@chr9:94513466:94515564:-	0.37	0.34	0.41	0.2	0.21	0.21	0.206667	0.373333	0.21	0.41	0.2	0.34	up
BICDL1	chr12:118993809:118993988:+@chr12:118994698:118994916:+@chr12:119003074:119003204:+	0.78	0.79	0.64	0.55	0.45	0.62	0.54	0.736667	0.62	0.79	0.45	0.64	up
BSG	chr19:531379:531461:+@chr19:531656|531762:531782:+	0.6	0.55	0.57	0.46	0.52	0.42	0.466667	0.573333	0.52	0.6	0.42	0.55	up
BTN3A3	chr6:26548680:26548855:+@chr6:26551589:26551649:+@chr6:26552164:26554192:+	0.93	0.95	0.94	0.87	0.78	0.78	0.81	0.94	0.87	0.95	0.78	0.93	up
C14orf159	chr14:90735854:90736002:+@chr14:90740803:90740964:+@chr14:90751502:90751890:+	0.88	0.79	0.79	0.6	0.56	0.73	0.63	0.82	0.73	0.88	0.56	0.79	up
C19orf44	chr19:16481310:16481799:+@chr19:16484825:16484920:+@chr19:16486308:16486474:+	0.84	0.81	0.84	0.73	0.64	0.71	0.693333	0.83	0.73	0.84	0.64	0.81	up
C19orf48	chr19:55999641:56000043:-@chr19:55997523:55997683:-@chr19:55997058:55997326:-	0.66	0.6	0.57	0.86	0.83	0.84	0.843333	0.61	0.86	0.66	0.83	0.57	down
C1orf167	chr1:11767792:11768026|11767933:+@chr1:11770032:11770691:+	0.17	0.15	0.13	0.29	0.31	0.18	0.26	0.15	0.31	0.17	0.18	0.13	down
C21orf2	chr21:44575227:44575134|44574774:-@chr21:44573235:44574637:-	0.34	0.17	0.34	0.36	0.41	0.51	0.426667	0.283333	0.51	0.34	0.36	0.17	down
CALHM2	chr10:105201903:105202152:-@chr10:105200830:105201032:-@chr10:105198861:105200547:-	0.74	0.59	0.53	0.5	0.42	0.2	0.373333	0.62	0.5	0.74	0.2	0.53	up
CCDC50	chr3:192570402:192570519:+@chr3:192575545:192576072:+@chr3:192580642:192580757:+	0.37	0.32	0.32	0.14	0.23	0.17	0.18	0.336667	0.23	0.37	0.14	0.32	up
CCDC78	chr16:715795:715881:-@chr16:715414:715592:-@chr16:712584:715294:-	0.56	0.67	0.76	0.51	0.51	0.38	0.466667	0.663333	0.51	0.76	0.38	0.56	up
CCDC78	chr16:715795:715881:-@chr16:715414:715581:-@chr16:712584:715294:-	0.78	0.61	0.89	0.52	0.6	0.51	0.543333	0.76	0.6	0.89	0.51	0.61	up
CCDC78	chr16:715795:715881:-@chr16:715447:715581:-@chr16:712584:715294:-	0.63	0.62	0.64	0.34	0.47	0.32	0.376667	0.63	0.47	0.64	0.32	0.62	up
CD44	chr11:35167785:35168188:+@chr11:35184235:35184366:+@chr11:35186228:35186329:+	0.4	0.45	0.42	0.3	0.28	0.3	0.293333	0.423333	0.3	0.45	0.28	0.4	up
CD47	chr3:109253476:109255521:-@chr3:109252115:109252139:-@chr3:109244629:109248829:-	0.42	0.49	0.33	0.23	0.3	0.26	0.263333	0.413333	0.3	0.49	0.23	0.33	up
CD47	chr3:109252115:109252187:-@chr3:109251156:109251188:-@chr3:109244629:109248829:-	0.68	0.67	0.68	0.23	0.19	0.34	0.253333	0.676667	0.34	0.68	0.19	0.67	up
CDK16	chrX:46970308:46970370:+@chrX:46970926:46971046:+	0.45	0.44	0.48	0.67	0.63	0.59	0.63	0.456667	0.67	0.48	0.59	0.44	down
CENPS	chr1:10413373:10414045:+@chr1:10416486:10416609:+@chr1:10417301:10417334:+	0.51	0.68	0.6	0.83	0.71	0.77	0.77	0.596667	0.83	0.68	0.71	0.51	down
CHTOP	chr1:151872920:151873443:+@chr1:151875672:151877548:+@chr1:151881343:151885399:+	0.95	0.91	0.91	0.8	0.78	0.8	0.793333	0.923333	0.8	0.95	0.78	0.91	up
CLCC1	chr1:109307506:109307693:-@chr1:109306454:109306614:-@chr1:109294454:109294593:-	0.61	0.44	0.42	0.21	0.31	0.37	0.296667	0.49	0.37	0.61	0.21	0.42	up
CLDN7	chr17:7104864:7106386:-@chr17:7104681:7104769:-@chr17:7102740:7104579:-	0.97	0.88	0.97	0.83	0.78	0.76	0.79	0.94	0.83	0.97	0.76	0.88	up
CLSTN1	chr1:9723739:9723905:-@chr1:9720143:9720199:-@chr1:9718530:9718687:-	0.13	0.11	0.11	0.29	0.33	0.3	0.306667	0.116667	0.33	0.13	0.29	0.11	down
CLSTN1	chr1:9755917:9756039:-@chr1:9739126:9739155:-@chr1:9737755:9737954:-	0.08	0.04	0.06	0.23	0.17	0.13	0.176667	0.06	0.23	0.08	0.13	0.04	down
CNOT2	chr12:68958175:68958321:+@chr12:68965447:68965633:+@chr12:68974118:68974341:+@chr12:68990942:68991064:+	0.62	0.69	0.61	0.24	0.6	0.51	0.45	0.64	0.6	0.69	0.24	0.61	up
CNOT2	chr12:68958175:68958321:+@chr12:68974118:68974341:+@chr12:68981752:68981912:+	0.55	0.45	0.63	0.38	0.34	0.39	0.37	0.543333	0.39	0.63	0.34	0.45	up
COQ9	chr16:56047917:56048063|56048039:+@chr16:56048344:56052683:+	0.65	0.81	0.75	0.5	0.64	0.47	0.536667	0.736667	0.64	0.81	0.47	0.65	up
CPNE7	chr16:88184916:88184967:+@chr16:88185036:88185169:+@chr16:88189276:88189512:+	0.53	0.57	0.68	0.5	0.34	0.35	0.396667	0.593333	0.5	0.68	0.34	0.53	up
CPSF3	chr2:9481233:9481632:+@chr2:9484113:9484202:+@chr2:9486345:9486408:+	0.19	0.34	0.21	0.16	0.11	0.14	0.136667	0.246667	0.16	0.34	0.11	0.19	up
CRIP2	chr14:105016507:105016875|105016601:+@chr14:105016968:105017551:+	0.23	0.19	0.21	0.56	0.39	0.26	0.403333	0.21	0.56	0.23	0.26	0.19	down
CRIP2	chr14:105016507:105016601:+@chr14:105016818:105016875:+@chr14:105016968:105017551:+	0.95	0.95	0.95	0.85	0.81	0.82	0.826667	0.95	0.85	0.95	0.81	0.95	up
CTNND1	chr11:57339439:57339548:+@chr11:57339963:57340049:+@chr11:57340345:57343233:+	0.32	0.33	0.33	0.05	0.08	0.06	0.0633333	0.326667	0.08	0.33	0.05	0.32	up
DBNL	chr7:44063906:44063987:+@chr7:44064253:44064404:+	0.08	0.17	0.07	0.2	0.56	0.51	0.423333	0.106667	0.56	0.17	0.2	0.07	down
DCAF11	chr14:23653193:23653973:+@chr14:23654431|23654592:23654798:+	0.56	0.64	0.62	0.4	0.5	0.5	0.466667	0.606667	0.5	0.64	0.4	0.56	up
DCAF11	chr14:23654431:23654441:+@chr14:23654564:23654775:+	0.66	0.63	0.73	0.51	0.34	0.61	0.486667	0.673333	0.61	0.73	0.34	0.63	up
DCAF11	chr14:23653193:23653973:+@chr14:23654431|23654592:23654775:+	0.57	0.63	0.64	0.41	0.56	0.51	0.493333	0.613333	0.56	0.64	0.41	0.57	up
DCTD	chr4:184074686:184074566|184074433:-@chr4:184073608:184073722:-	0.33	0.22	0.43	0.18	0.13	0.13	0.146667	0.326667	0.18	0.43	0.13	0.22	up
DCTN3	chr9:34604707:34607968:-@chr9:34604039:34604098:-@chr9:34603548:34603898:-	0.87	0.9	0.91	0.8	0.67	0.81	0.76	0.893333	0.81	0.91	0.67	0.87	up
DDIT3	chr12:56197756:56200612:-@chr12:56197488|56197509:56197319:-	0.06	0.09	0.08	0.13	0.24	0.35	0.24	0.0766667	0.35	0.09	0.13	0.06	down
DDIT3	chr12:56197756:56197803:-@chr12:56197319:56197488:-	0.11	0.14	0.12	0.22	0.18	0.29	0.23	0.123333	0.29	0.14	0.18	0.11	down
DDX11	chr12:31147137:31147221:+@chr12:31147523:31147596:+@chr12:31147778:31148992:+	0.61	0.76	0.74	0.52	0.52	0.54	0.526667	0.703333	0.54	0.76	0.52	0.61	up
DDX11	chr12:31143988:31144908:+@chr12:31145200|31145228:31145331:+	0.13	0.27	0.22	0.1	0.08	0.11	0.0966667	0.206667	0.11	0.27	0.08	0.13	up
DDX11	chr12:31146628:31146728:+@chr12:31147137:31147221:+@chr12:31147778:31148992:+	0.55	0.55	0.47	0.28	0.3	0.45	0.343333	0.523333	0.45	0.55	0.28	0.47	up
DDX11	chr12:31147137:31147221:+@chr12:31147518:31147596:+@chr12:31147778:31148992:+	0.86	0.9	0.89	0.8	0.78	0.76	0.78	0.883333	0.8	0.9	0.76	0.86	up
DDX39A	chr19:14382417:14382360|14382233:-@chr19:14381554:14382146:-	0.54	0.5	0.46	0.28	0.32	0.28	0.293333	0.5	0.32	0.54	0.28	0.46	up
DDX39A	chr19:14383318:14383410:-@chr19:14382948|14382951:14382801:-	0.55	0.8	0.56	0.49	0.42	0.29	0.4	0.636667	0.49	0.8	0.29	0.55	up
DDX39A	chr19:14382417:14382362|14382233:-@chr19:14381554:14382146:-	0.53	0.71	0.52	0.31	0.31	0.3	0.306667	0.586667	0.31	0.71	0.3	0.52	up
DEF8	chr16:88541835:88542723:+@chr16:88543326:88543547:+@chr16:88548152:88548285:+	0.47	0.37	0.44	0.19	0.16	0.3	0.216667	0.426667	0.3	0.47	0.16	0.37	up
DEPDC1	chr1:68722221:68722361:-@chr1:68720317:68721168:-@chr1:68719711:68719883:-	0.49	0.58	0.54	0.26	0.29	0.26	0.27	0.536667	0.29	0.58	0.26	0.49	up
DEPDC1	chr1:68722221:68722361:-@chr1:68720912:68721168:-@chr1:68719711:68719883:-	0.28	0.36	0.34	0.11	0.1	0.11	0.106667	0.326667	0.11	0.36	0.1	0.28	up
DHRS1	chr14:23830602:23830671:-@chr14:23830185:23830265:-	0.29	0.22	0.39	0.49	0.72	0.57	0.593333	0.3	0.72	0.39	0.49	0.22	down
DNAJB12	chr10:73765598:73765695:-@chr10:73764269:73764381:-	0.19	0.31	0.2	0.36	0.6	0.45	0.47	0.233333	0.6	0.31	0.36	0.19	down
DNAJB12	chr10:73765695:73765598|73765544:-@chr10:73762594:73764381:-	0.66	0.68	0.73	0.74	0.78	0.87	0.796667	0.69	0.87	0.73	0.74	0.66	down
DNAJB12	chr10:73765367:73765695:-@chr10:73764269:73764381:-	0.74	0.47	0.71	0.8	0.77	0.8	0.79	0.64	0.8	0.74	0.77	0.47	down
DRG2	chr17:17943056:17943132:+@chr17:17943672:17944474:+	0.63	0.33	0.31	0.28	0.21	0.24	0.243333	0.423333	0.28	0.63	0.21	0.31	up
DSCR3	chr21:37561409:37562294:-@chr21:37560963:37561018:-@chr21:37535868:37535985:-@chr21:37534478:37534810:-	0.2	0.24	0.15	0.33	0.26	0.33	0.306667	0.196667	0.33	0.24	0.26	0.15	down
DSCR3	chr21:37561409:37562294:-@chr21:37527533:37527613:-@chr21:37526516:37526622:-	0.8	0.78	0.84	0.54	0.44	0.71	0.563333	0.806667	0.71	0.84	0.44	0.78	up
DUSP18	chr22:29393449:29393873:-@chr22:29392794:29392925:-@chr22:29390942:29391108:-@chr22:29387450:29390067:-	0.58	0.58	0.65	0.77	0.67	0.81	0.75	0.603333	0.81	0.65	0.67	0.58	down
E4F1	chr16:2223013:2223185:+@chr16:2223440:2223653:+@chr16:2223887:2223992:+	0.74	0.72	0.82	0.9	0.91	0.88	0.896667	0.76	0.91	0.82	0.88	0.72	down
E4F1	chr16:2223013:2223185:+@chr16:2223440:2223649:+@chr16:2223887:2223992:+	0.76	0.68	0.84	0.87	0.91	0.91	0.896667	0.76	0.91	0.84	0.87	0.68	down
EEF1D	chr8:144750661:144750988:-@chr8:144742621:144743394:-@chr8:144740042:144740162:-	0.41	0.33	0.38	0.53	0.61	0.49	0.543333	0.373333	0.61	0.41	0.49	0.33	down
EEF1D	chr8:144750661:144750988:-@chr8:144744048|144744051:144743921:-	0.43	0.48	0.57	0.77	0.8	0.82	0.796667	0.493333	0.82	0.57	0.77	0.43	down
EEF1D	chr8:144750661:144750988:-@chr8:144745960:144745973:-@chr8:144743921:144744051:-	0.44	0.6	0.28	0.2	0.16	0.16	0.173333	0.44	0.2	0.6	0.16	0.28	up
EEF1D	chr8:144739532:144739603:-@chr8:144734641|144735019:144734599:-	0.41	0.29	0.45	0.1	0.24	0.19	0.176667	0.383333	0.24	0.45	0.1	0.29	up
EHMT1	chr9:139776948:139777093:+@chr9:139789382:139789525:+@chr9:139790891:139791117:+	0.93	0.87	0.84	0.81	0.77	0.75	0.776667	0.88	0.81	0.93	0.75	0.84	up
EIF4A2	chr3:187984915:187985179:+@chr3:187985519:187985584:+@chr3:187986366:187987128:+	0.55	0.55	0.52	0.44	0.47	0.39	0.433333	0.54	0.47	0.55	0.39	0.52	up
EIF4A2	chr3:187988264:187988365:+@chr3:187988793:187988903:+@chr3:187989608:187990761:+	0.43	0.44	0.42	0.66	0.64	0.63	0.643333	0.43	0.66	0.44	0.63	0.42	down
EIF4A2	chr3:187988264:187988365:+@chr3:187988793:187988899:+@chr3:187989608:187990761:+	0.4	0.42	0.37	0.61	0.55	0.59	0.583333	0.396667	0.61	0.42	0.55	0.37	down
ELMOD3	chr2:85435710:85435810:+@chr2:85437603:85437886:+	0.43	0.2	0.09	0.49	0.58	0.62	0.563333	0.24	0.62	0.43	0.49	0.09	down
ELMOD3	chr2:85435710:85435804:+@chr2:85437601:85437886:+	0.26	0.18	0.08	0.31	0.58	0.45	0.446667	0.173333	0.58	0.26	0.31	0.08	down
EMP3	chr19:53520394:53520679:+@chr19:53522590:53522692:+@chr19:53524421:53524561:+	0.74	0.78	0.88	0.95	0.94	0.95	0.946667	0.8	0.95	0.88	0.94	0.74	down
EMP3	chr19:53522590:53522692|53522630:+@chr19:53524421:53524561:+	0.83	0.76	0.77	0.89	0.88	0.9	0.89	0.786667	0.9	0.83	0.88	0.76	down
EMP3	chr19:53522590:53522733|53522692:+@chr19:53524421:53524561:+	0.12	0.21	0.07	0.02	0.04	0.03	0.03	0.133333	0.04	0.21	0.02	0.07	up
ENTPD6	chr20:25124328:25124503:+@chr20:25135158:25135226:+@chr20:25135712:25136158:+	0.53	0.67	0.51	0.72	0.75	0.92	0.796667	0.57	0.92	0.67	0.72	0.51	down
EPB41L1	chr20:34144001:34144149:+@chr20:34225100:34225290:+@chr20:34226887:34227051:+	0.92	0.9	0.91	0.76	0.82	0.83	0.803333	0.91	0.83	0.92	0.76	0.9	up
EPN2	chr17:19081247:19081437:+@chr17:19117957:19118224:+@chr17:19125861:19125983:+	0.18	0.16	0.12	0.52	0.42	0.44	0.46	0.153333	0.52	0.18	0.42	0.12	down
ESRP1	chr8:95755712:95755910|95755898:+@chr8:95759607:95759775:+	0.56	0.56	0.52	0.66	0.74	0.68	0.693333	0.546667	0.74	0.56	0.66	0.52	down
FAM122B	chrX:133743517:133743613:-@chrX:133733139:133733979:-@chrX:133731262:133733050:-	0.58	0.67	0.56	0.73	0.75	0.72	0.733333	0.603333	0.75	0.67	0.72	0.56	down
FAM122B	chrX:133743517:133743613:-@chrX:133733839:133733979:-@chrX:133731262:133733050:-	0.37	0.55	0.4	0.68	0.63	0.59	0.633333	0.44	0.68	0.55	0.59	0.37	down
FAM122B	chrX:133743517:133743613:-@chrX:133733050|133733979:133731270:-	0.64	0.73	0.66	0.81	0.84	0.81	0.82	0.676667	0.84	0.73	0.81	0.64	down
FAM193B	chr5:176892050:176892248:-@chr5:176890889:176891128:-@chr5:176883792:176884812:-	0.47	0.47	0.53	0.55	0.64	0.62	0.603333	0.49	0.64	0.53	0.55	0.47	down
FAM21A	chr10:51527441:51527568:+@chr10:51529744:51529830:+@chr10:51533808:51533909:+	0.69	0.66	0.7	0.33	0.61	0.5	0.48	0.683333	0.61	0.7	0.33	0.66	up
FBXL12	chr19:9790221:9790765:-@chr19:9786248:9786345:-@chr19:9785814:9786018:-@chr19:9781943:9783393:-	0.28	0.36	0.36	0.52	0.58	0.39	0.496667	0.333333	0.58	0.36	0.39	0.28	down
FBXL6	chr8:145551068:145551181:-@chr8:145550768:145551017:-	0.37	0.41	0.33	0.76	0.49	0.55	0.6	0.37	0.76	0.41	0.49	0.33	down
FDPS	chr1:153545327:153546620:+@chr1:153548748:153548810:+@chr1:153554356:153554436:+	0.79	0.82	0.77	0.6	0.73	0.64	0.656667	0.793333	0.73	0.82	0.6	0.77	up
FGFR2	chr10:123288096:123288219:-@chr10:123269483:123269673:-@chr10:123264627:123264823:-@chr10:123253294:123253445:-	0.3	0.31	0.27	0.55	0.38	0.46	0.463333	0.293333	0.55	0.31	0.38	0.27	down
FN1	chr2:215945081:215945343:-@chr2:215944877:215944983:-	0.75	0.7	0.8	0.64	0.67	0.61	0.64	0.75	0.67	0.8	0.61	0.7	up
FN1	chr2:215946290:215946379:-@chr2:215945081:215945343:-@chr2:215944877:215944983:-	0.74	0.79	0.66	0.65	0.54	0.65	0.613333	0.73	0.65	0.79	0.54	0.66	up
GALT	chr9:34637386:34637564:+@chr9:34637654:34637702:+@chr9:34637829:34637962:+	0.9	0.92	0.96	0.86	0.77	0.59	0.74	0.926667	0.86	0.96	0.59	0.9	up
GALT	chr9:34637086:34637564:+@chr9:34637654:34637958:+	0.39	0.57	0.57	0.68	0.62	0.83	0.71	0.51	0.83	0.57	0.62	0.39	down
GLTSCR2	chr19:52950417:52950592:+@chr19:52950825|52951597:52951673:+	0.49	0.54	0.63	0.77	0.75	0.64	0.72	0.553333	0.77	0.63	0.64	0.49	down
GLYCTK	chr3:52296885:52296932:+@chr3:52299360:52299775:+@chr3:52300016:52300978:+	0.72	0.77	0.3	0.89	0.85	0.86	0.866667	0.596667	0.89	0.77	0.85	0.3	down
GLYCTK	chr3:52300016:52300978|52300167:+@chr3:52301316:52304312:+	0.66	0.63	0.62	0.82	0.74	0.84	0.8	0.636667	0.84	0.66	0.74	0.62	down
GLYCTK	chr3:52301316:52302248:+@chr3:52302363:52302527:+	0.53	0.8	0.65	0.9	0.83	0.84	0.856667	0.66	0.9	0.8	0.83	0.53	down
GPANK1	chr6:31740597:31741964:-@chr6:31740333|31740336:31739609:-	0.49	0.58	0.38	0.63	0.76	0.79	0.726667	0.483333	0.79	0.58	0.63	0.38	down
GPRC5C	chr17:69947479:69948561|69947780:+@chr17:69951552:69951646:+	0.93	0.83	0.89	0.73	0.78	0.71	0.74	0.883333	0.78	0.93	0.71	0.83	up
GSN	chr9:123102091:123102225:+@chr9:123104023|123104062:123104266:+	0.25	0.21	0.33	0.42	0.35	0.35	0.373333	0.263333	0.42	0.33	0.35	0.21	down
GSN	chr9:123083569:123083661:+@chr9:123083974:123084052:+@chr9:123102201:123102225:+@chr9:123104062:123104266:+	0.11	0.06	0.07	0.28	0.14	0.27	0.23	0.08	0.28	0.11	0.14	0.06	down
GSN	chr9:123083925:123084052:+@chr9:123104023|123104070:123104266:+	0.34	0.67	0.54	0.77	0.86	0.7	0.776667	0.516667	0.86	0.67	0.7	0.34	down
GSN	chr9:123083569:123083661:+@chr9:123083974:123084052:+@chr9:123102164:123102225:+@chr9:123104023:123104266:+	0.29	0.2	0.28	0.51	0.39	0.39	0.43	0.256667	0.51	0.29	0.39	0.2	down
GSN	chr9:123083569:123083661:+@chr9:123105010:123105164:+@chr9:123112783:123112944:+	0.94	0.93	0.95	0.78	0.89	0.79	0.82	0.94	0.89	0.95	0.78	0.93	up
GSN	chr9:123083569:123083661:+@chr9:123083974:123084052:+@chr9:123084538:123084649:+@chr9:123104070:123104266:+	0.1	0.29	0.19	0.47	0.5	0.3	0.423333	0.193333	0.5	0.29	0.3	0.1	down
GSN	chr9:123083569:123083661:+@chr9:123088182:123088284:+@chr9:123102164:123102225:+@chr9:123104023:123104266:+	0.14	0.15	0.14	0.33	0.28	0.19	0.266667	0.143333	0.33	0.15	0.19	0.14	down
GSTM4	chr1:110002959:110003255:+@chr1:110003935:110004104:+@chr1:110005310:110005853:+	0.07	0.07	0.05	0.21	0.15	0.34	0.233333	0.0633333	0.34	0.07	0.15	0.05	down
HCFC1R1	chr16:3013476:3013532:-@chr16:3013235:3013363:-	0.14	0.11	0.13	0.2	0.51	0.28	0.33	0.126667	0.51	0.14	0.2	0.11	down
HCFC1R1	chr16:3013849:3013970:-@chr16:3013235:3013363:-	0.11	0.12	0.07	0.48	0.39	0.3	0.39	0.1	0.48	0.12	0.3	0.07	down
HCFC1R1	chr16:3013849:3014288:-@chr16:3013363|3013414:3013235:-	0.15	0.17	0.21	0.41	0.37	0.38	0.386667	0.176667	0.41	0.21	0.37	0.15	down
HCFC1R1	chr16:3013849:3013970:-@chr16:3013235:3013532:-	0.22	0.15	0.18	0.63	0.72	0.59	0.646667	0.183333	0.72	0.22	0.59	0.15	down
HCFC1R1	chr16:3013849:3013970:-@chr16:3013235:3013414:-	0.41	0.25	0.18	0.6	0.67	0.45	0.573333	0.28	0.67	0.41	0.45	0.18	down
HDAC8	chrX:71631731:71631843:-@chrX:71627504:71627581:-@chrX:71625508:71625616:-	0.92	0.89	0.89	0.73	0.79	0.54	0.686667	0.9	0.79	0.92	0.54	0.89	up
HLCS	chr21:37256206:37256340:-@chr21:37241503:37242457:-@chr21:37232998:37233164:-	0.16	0.14	0.03	0.18	0.37	0.24	0.263333	0.11	0.37	0.16	0.18	0.03	down
KBTBD3	chr11:105453249:105453701:-@chr11:105434802:105435046:-@chr11:105427035:105430392:-	0.82	0.86	0.84	0.61	0.78	0.71	0.7	0.84	0.78	0.86	0.61	0.82	up
KIAA0391	chr14:34661511:34661867:+@chr14:34665692:34665739:+@chr14:34666436:34666568:+	0.86	0.8	0.73	0.7	0.68	0.7	0.693333	0.796667	0.7	0.86	0.68	0.73	up
KIAA0391	chr14:34661511:34661867:+@chr14:34665692:34665739:+@chr14:34666436:34666568:+	0.86	0.8	0.73	0.7	0.68	0.7	0.693333	0.796667	0.7	0.86	0.68	0.73	up
KIAA0391	chr14:34851838:34852020|34852010:+@chr14:34853318:34853412:+	0.68	0.75	0.69	0.82	0.88	0.8	0.833333	0.706667	0.88	0.75	0.8	0.68	down
KIAA0907	chr1:154152288:154152379:-@chr1:154149460:154150735:-	0.27	0.24	0.33	0.35	0.4	0.43	0.393333	0.28	0.43	0.33	0.35	0.24	down
KIF13A	chr6:17880118:17880269:-@chr6:17879324:17879428:-@chr6:17871903:17873156:-	0.61	0.72	0.67	0.41	0.34	0.39	0.38	0.666667	0.41	0.72	0.34	0.61	up
KTN1	chr14:55209400:55209483:+@chr14:55209643:55209726:+@chr14:55212306:55212389:+	0.56	0.5	0.61	0.63	0.7	0.75	0.693333	0.556667	0.75	0.61	0.63	0.5	down
LINC01089	chr12:120724920:120726042:-@chr12:120724092|120724097:120723996:-	0.76	0.8	0.74	0.73	0.67	0.46	0.62	0.766667	0.73	0.8	0.46	0.74	up
LMO7	chr13:75276315:75276678:+@chr13:75277616:75277897:+@chr13:75279617:75280388:+	0.25	0.15	0.31	0.38	0.52	0.46	0.453333	0.236667	0.52	0.31	0.38	0.15	down
LOC101928143	chr14:72818820:72818966:-@chr14:72815742:72815885:-@chr14:72811568:72813754:-	0.62	0.69	0.59	0.54	0.48	0.51	0.51	0.633333	0.54	0.69	0.48	0.59	up
LOC105369243	chr16:29378695:29378807:+@chr16:29380173|29380204:29380355:+	0.06	0.06	0.07	0.21	0.15	0.16	0.173333	0.0633333	0.21	0.07	0.15	0.06	down
LPAR2	chr19:19599901:19601191:-@chr19:19599563:19599778:-@chr19:19598853:19599313:-	0.43	0.41	0.44	0.59	0.53	0.63	0.583333	0.426667	0.63	0.44	0.53	0.41	down
LPAR2	chr19:19600237:19600739:-@chr19:19599901:19600010:-@chr19:19598853:19599313:-	0.55	0.66	0.6	0.29	0.26	0.29	0.28	0.603333	0.29	0.66	0.26	0.55	up
LPAR2	chr19:19600237:19600739:-@chr19:19599901:19600022:-@chr19:19598853:19599313:-	0.54	0.49	0.62	0.41	0.39	0.32	0.373333	0.55	0.41	0.62	0.32	0.49	up
LRP8	chr1:53488950:53489122:-@chr1:53487640:53487816:-@chr1:53480624:53485316:-	0.38	0.54	0.45	0.62	0.57	0.63	0.606667	0.456667	0.63	0.54	0.57	0.38	down
LRP8	chr1:53513891:53514013:-@chr1:53510864:53510902:-@chr1:53509487:53509606:-	0.5	0.59	0.81	0.41	0.47	0.24	0.373333	0.633333	0.47	0.81	0.24	0.5	up
LSR	chr19:40441688:40441807:+@chr19:40445289:40445435:+@chr19:40449102:40449275:+	0.37	0.34	0.31	0.44	0.46	0.46	0.453333	0.34	0.46	0.37	0.44	0.31	down
LSR	chr19:40441688:40441807:+@chr19:40445239:40445435:+@chr19:40449102:40449275:+	0.2	0.18	0.15	0.26	0.27	0.31	0.28	0.176667	0.31	0.2	0.26	0.15	down
LUC7L	chr16:219279:219478:-@chr16:218333:218402:-@chr16:217242:217336:-	0.37	0.44	0.73	0.24	0.1	0.33	0.223333	0.513333	0.33	0.73	0.1	0.37	up
LUC7L	chr16:219279:219478:-@chr16:217336|218402:217242:-	0.17	0.18	0.28	0.09	0.07	0.16	0.106667	0.21	0.16	0.28	0.07	0.17	up
MAP4K4	chr2:101842537:101842758:+@chr2:101843719:101843880:+@chr2:101846715:101846945:+	0.7	0.69	0.79	0.53	0.49	0.28	0.433333	0.726667	0.53	0.79	0.28	0.69	up
MAP4K4	chr2:101841890:101841976:+@chr2:101842537|101842630:101842758:+	0.42	0.4	0.47	0.26	0.33	0.36	0.316667	0.43	0.36	0.47	0.26	0.4	up
MARK3	chr14:103025487:103028124:+@chr14:103034592:103034618:+@chr14:103036246:103036290:+	0.54	0.72	0.71	0.88	0.88	0.86	0.873333	0.656667	0.88	0.72	0.86	0.54	down
MARS	chr12:56169317:56169608|56169395:+@chr12:56170257:56170429:+	0.16	0.1	0.16	0.21	0.32	0.5	0.343333	0.14	0.5	0.16	0.21	0.1	down
MATR3	chr5:138642639:138642717:+@chr5:138643523:138643646:+@chr5:138646327:138647086:+	0.71	0.82	0.74	0.51	0.35	0.43	0.43	0.756667	0.51	0.82	0.35	0.71	up
MBNL1	chr3:153645761:153646018:+@chr3:153647183:153647236:+@chr3:153648099:153648252:+	0.4	0.39	0.38	0.25	0.24	0.23	0.24	0.39	0.25	0.4	0.23	0.38	up
MBNL2	chr13:96807737:96807890:+@chr13:96815391:96815426:+@chr13:96816714:96816808:+	0.49	0.15	0.21	0.09	0.03	0.09	0.07	0.283333	0.09	0.49	0.03	0.15	up
MEGF8	chr19:47554136:47554299:+@chr19:47554779:47554946:+@chr19:47555090:47555234:+	0.16	0.09	0.07	0.19	0.48	0.25	0.306667	0.106667	0.48	0.16	0.19	0.07	down
MEGF8	chr19:47566637:47566823:+@chr19:47567342:47567474:+@chr19:47571499:47574761:+	0.6	0.53	0.24	0.61	0.84	0.76	0.736667	0.456667	0.84	0.6	0.61	0.24	down
METTL5	chr2:170389245:170389670:-@chr2:170385848:170386029:-@chr2:170376424:170377262:-	0.87	0.88	0.82	0.57	0.81	0.49	0.623333	0.856667	0.81	0.88	0.49	0.82	up
MFSD10	chr4:2904125:2904734:-@chr4:2903876:2903934:-@chr4:2902900:2903678:-	0.88	0.91	0.92	0.51	0.61	0.8	0.64	0.903333	0.8	0.92	0.51	0.88	up
MFSD10	chr4:2905092:2905188:-@chr4:2904702|2904734:2904631:-	0.85	0.88	0.88	0.79	0.78	0.72	0.763333	0.87	0.79	0.88	0.72	0.85	up
MGRN1	chr16:4673845:4673934:+@chr16:4676261:4676305:+@chr16:4678798:4681348:+	0.11	0.15	0.1	0.33	0.34	0.3	0.323333	0.12	0.34	0.15	0.3	0.1	down
MIF4GD	chr17:70777790:70778887:-@chr17:70777124|70777145:70777023:-	0.72	0.84	0.77	0.66	0.64	0.59	0.63	0.776667	0.66	0.84	0.59	0.72	up
MIR1204	chr8:128875942:128876162:+@chr8:128877322:128877436:+@chr8:128936583:128936747:+	0.15	0.38	0.23	0.46	0.48	0.4	0.446667	0.253333	0.48	0.38	0.4	0.15	down
MIR1248	chr3:187988264:187988365:+@chr3:187988793:187988903:+@chr3:187989608:187990761:+	0.43	0.44	0.42	0.66	0.64	0.63	0.643333	0.43	0.66	0.44	0.63	0.42	down
MIR1248	chr3:187988264:187988365:+@chr3:187988793:187988899:+@chr3:187989608:187990761:+	0.4	0.42	0.37	0.61	0.55	0.59	0.583333	0.396667	0.61	0.42	0.55	0.37	down
MIR1248	chr3:187984915:187985179:+@chr3:187985519:187985584:+@chr3:187986366:187987128:+	0.55	0.55	0.52	0.44	0.47	0.39	0.433333	0.54	0.47	0.55	0.39	0.52	up
MIR1914	chr20:62047958:62048064:-@chr20:62047602:62047796:-	0.29	0.26	0.26	0.33	0.58	0.45	0.453333	0.27	0.58	0.29	0.33	0.26	down
MIR616	chr12:56197756:56200612:-@chr12:56197488|56197509:56197319:-	0.06	0.09	0.08	0.13	0.24	0.35	0.24	0.0766667	0.35	0.09	0.13	0.06	down
MIR6758	chr12:56169317:56169608|56169395:+@chr12:56170257:56170429:+	0.16	0.1	0.16	0.21	0.32	0.5	0.343333	0.14	0.5	0.16	0.21	0.1	down
MIR6789	chr19:2184995:2185060:-@chr19:2184153:2184904:-	0.2	0.08	0.18	0.22	0.31	0.32	0.283333	0.153333	0.32	0.2	0.22	0.08	down
MIR6837	chr7:44063906:44063987:+@chr7:44064253:44064404:+	0.08	0.17	0.07	0.2	0.56	0.51	0.423333	0.106667	0.56	0.17	0.2	0.07	down
MIR6838	chr7:44084935:44084880|44084864:-@chr7:44079907:44080654:-	0.39	0.36	0.38	0.55	0.51	0.44	0.5	0.376667	0.55	0.39	0.44	0.36	down
MORF4L2	chrX:102826755:102828303:-@chrX:102820184|102820235:102820083:-	0.64	0.68	0.61	0.55	0.35	0.57	0.49	0.643333	0.57	0.68	0.35	0.61	up
MPDU1	chr17:7429774:7429843|7429839:+@chr17:7429988:7430480:+	0.21	0.24	0.18	0.06	0.1	0.11	0.09	0.21	0.11	0.24	0.06	0.18	up
MPDU1	chr17:7425420:7428007:+@chr17:7429737:7429839:+@chr17:7430734:7431313:+	0.11	0.1	0.21	0.22	0.33	0.22	0.256667	0.14	0.33	0.21	0.22	0.1	down
MPPE1	chr18:11876916:11877024:-@chr18:11876712:11876777:-@chr18:11876114:11876620:-	0.67	0.71	0.82	0.47	0.53	0.56	0.52	0.733333	0.56	0.82	0.47	0.67	up
MSLN	chr16:711802:711942:+@chr16:712085:712135:+	0.31	0.46	0.2	0.09	0.16	0.18	0.143333	0.323333	0.18	0.46	0.09	0.2	up
MSLN	chr16:718795:718896|718869:+@chr16:719010:719716:+	0.68	0.71	0.8	0.66	0.38	0.46	0.5	0.73	0.66	0.8	0.38	0.68	up
MSLN	chr16:719010:719089:+@chr16:719289:719716:+	0.16	0.17	0.25	0.32	0.28	0.55	0.383333	0.193333	0.55	0.25	0.28	0.16	down
MTG2	chr20:60199681:60202075:+@chr20:60202667:60202855:+@chr20:60203328:60203464:+@chr20:60204253:60205210:+	0.48	0.25	0.41	0.22	0.15	0.2	0.19	0.38	0.22	0.48	0.15	0.25	up
MTMR3	chr22:29122933:29123159:+@chr22:29125632:29125707:+@chr22:29132331:29132374:+	0.94	0.95	0.9	0.79	0.85	0.84	0.826667	0.93	0.85	0.95	0.79	0.9	up
MTMR3	chr22:29821520:29821595:+@chr22:29821838:29822883:+	0.67	0.45	0.53	0.81	0.85	0.74	0.8	0.55	0.85	0.67	0.74	0.45	down
MYO18A	chr17:24445915:24445994:-@chr17:24445794:24445852:-	0.86	0.8	0.76	0.56	0.69	0.73	0.66	0.806667	0.73	0.86	0.56	0.76	up
MYO18A	chr17:24437582:24437944:-@chr17:24436748:24436792:-@chr17:24433460:24433582:-	0.15	0.07	0.07	0.4	0.44	0.41	0.416667	0.0966667	0.44	0.15	0.4	0.07	down
MYO5A	chr15:50425850:50425950:-@chr15:50422606:50422686:-@chr15:50419685:50419883:-	0.31	0.23	0.27	0.57	0.68	0.52	0.59	0.27	0.68	0.31	0.52	0.23	down
MYOF	chr10:95145889:95145971:-@chr10:95142664:95142702:-@chr10:95138777:95138901:-	0.44	0.51	0.39	0.82	0.8	0.69	0.77	0.446667	0.82	0.51	0.69	0.39	down
NADSYN1	chr11:70843804:70843864:+@chr11:70847122:70847250:+@chr11:70852126:70852179:+	0.58	0.56	0.67	0.52	0.52	0.46	0.5	0.603333	0.52	0.67	0.46	0.56	up
NAT9	chr17:70280126:70280129:-@chr17:70279694:70280011:-	0.4	0.5	0.33	0.64	0.7	0.76	0.7	0.41	0.76	0.5	0.64	0.33	down
NAT9	chr17:70281789:70281727|70281600:-@chr17:70280330:70281419:-	0.73	0.77	0.69	0.54	0.5	0.59	0.543333	0.73	0.59	0.77	0.5	0.69	up
NDEL1	chr17:8304052:8304203:+@chr17:8307363:8307397:+@chr17:8310973:8312212:+	0.4	0.3	0.33	0.51	0.59	0.47	0.523333	0.343333	0.59	0.4	0.47	0.3	down
NDRG4	chr16:57100559:57100594:+@chr16:57100706:57100757:+@chr16:57102827:57105026:+	0.89	0.92	0.95	0.83	0.75	0.85	0.81	0.92	0.85	0.95	0.75	0.89	up
NDUFA3	chr19:59297999:59298308:+@chr19:59300716:59300822:+@chr19:59301053:59301589:+	0.1	0.11	0.08	0.26	0.12	0.24	0.206667	0.0966667	0.26	0.11	0.12	0.08	down
NDUFV1	chr11:67130899:67131123:+@chr11:67132447|67132599:67132769:+	0.34	0.28	0.32	0.36	0.51	0.52	0.463333	0.313333	0.52	0.34	0.36	0.28	down
NFIA	chr1:61644822:61644987:+@chr1:61664725:61664816:+@chr1:61677711:61677778:+@chr1:61693563:61696544:+	0.93	0.95	0.94	0.82	0.86	0.78	0.82	0.94	0.86	0.95	0.78	0.93	up
NIPBL	chr5:37099649:37099878|37099837:+@chr5:37100386:37102265:+	0.38	0.6	0.45	0.26	0.32	0.33	0.303333	0.476667	0.33	0.6	0.26	0.38	up
NMNAT3	chr3:140780404:140780587:-@chr3:140775130:140775212:-@chr3:140761712:140762924:-	0.9	0.88	0.75	0.61	0.39	0.7	0.566667	0.843333	0.7	0.9	0.39	0.75	up
NMNAT3	chr3:140829148:140829296:-@chr3:140780404:140780587:-@chr3:140761712:140762924:-	0.6	0.72	0.86	0.43	0.58	0.4	0.47	0.726667	0.58	0.86	0.4	0.6	up
NUMB	chr14:72818820:72818966:-@chr14:72815742:72815885:-@chr14:72811568:72813754:-	0.62	0.69	0.59	0.54	0.48	0.51	0.51	0.633333	0.54	0.69	0.48	0.59	up
NUP50	chr22:43945533:43945720|43945688:+@chr22:43946145:43947152:+	0.77	0.76	0.62	0.57	0.4	0.57	0.513333	0.716667	0.57	0.77	0.4	0.62	up
NUP50	chr22:43942713:43942791:+@chr22:43945533:43945720:+@chr22:43946145:43947152:+	0.79	0.71	0.73	0.6	0.64	0.56	0.6	0.743333	0.64	0.79	0.56	0.71	up
NUP50	chr22:43942713:43942791:+@chr22:43945533:43945654:+@chr22:43946145:43947152:+	0.68	0.59	0.53	0.34	0.52	0.34	0.4	0.6	0.52	0.68	0.34	0.53	up
NUP50	chr22:43945533:43945697|43945654:+@chr22:43946145:43947152:+	0.61	0.6	0.64	0.82	0.67	0.74	0.743333	0.616667	0.82	0.64	0.67	0.6	down
NUP88	chr17:5263398:5264224:-@chr17:5262160|5262185:5262059:-	0.42	0.55	0.45	0.35	0.41	0.32	0.36	0.473333	0.41	0.55	0.32	0.42	up
ORMDL1	chr2:190357240:190357342:-@chr2:190355985:190356094:-@chr2:190355393:190355573:-	0.39	0.45	0.28	0.48	0.56	0.55	0.53	0.373333	0.56	0.45	0.48	0.28	down
OSBPL3	chr7:24840880:24840630|24840231:-@chr7:24836912:24837049:-	0.24	0.17	0.21	0.41	0.49	0.38	0.426667	0.206667	0.49	0.24	0.38	0.17	down
OSMR	chr5:38939741:38939883:+@chr5:38940209|38940212:38940362:+	0.19	0.17	0.15	0.25	0.33	0.29	0.29	0.17	0.33	0.19	0.25	0.15	down
PBX3	chr9:127550436:127550723:+@chr9:127717786:127718027:+@chr9:127731755:127731945:+	0.66	0.79	0.67	0.89	0.81	0.85	0.85	0.706667	0.89	0.79	0.81	0.66	down
PCED1A	chr20:2769512:2769888:-@chr20:2768435:2768579:-@chr20:2767771:2767917:-	0.9	0.81	0.83	0.77	0.68	0.48	0.643333	0.846667	0.77	0.9	0.48	0.81	up
PCED1A	chr20:2767242:2767392:-@chr20:2764685:2764960:-	0.34	0.16	0.27	0.53	0.58	0.46	0.523333	0.256667	0.58	0.34	0.46	0.16	down
PCED1A	chr20:2769512:2769888:-@chr20:2767838:2767917:-@chr20:2764685:2767392:-	0.22	0.28	0.25	0.43	0.5	0.71	0.546667	0.25	0.71	0.28	0.43	0.22	down
PCED1A	chr20:2768435:2769270:-@chr20:2767912|2767917:2767838:-	0.92	0.9	0.84	0.73	0.66	0.78	0.723333	0.886667	0.78	0.92	0.66	0.84	up
PCED1A	chr20:2767238:2767392:-@chr20:2764685:2764960:-	0.35	0.17	0.27	0.5	0.61	0.43	0.513333	0.263333	0.61	0.35	0.43	0.17	down
PCED1A	chr20:2767838:2767917:-@chr20:2767490:2767575:-@chr20:2764685:2767392:-	0.94	0.93	0.86	0.8	0.84	0.75	0.796667	0.91	0.84	0.94	0.75	0.86	up
PDHB	chr3:58392644:58394451:-@chr3:58391709|58392560:58391424:-	0.29	0.34	0.36	0.41	0.51	0.56	0.493333	0.33	0.56	0.36	0.41	0.29	down
PFDN5	chr12:51975890:51975992:+@chr12:51976481|51977901:51977975:+	0.44	0.45	0.2	0.61	0.66	0.53	0.6	0.363333	0.66	0.45	0.53	0.2	down
PFDN5	chr12:51976481:51976602:+@chr12:51977901:51977975:+	0.54	0.46	0.41	0.73	0.7	0.79	0.74	0.47	0.79	0.54	0.7	0.41	down
PHYKPL	chr5:177581962:177582870:-@chr5:177574883:177575037:-@chr5:177574403:177574492:-	0.91	0.84	0.9	0.79	0.63	0.83	0.75	0.883333	0.83	0.91	0.63	0.84	up
PHYKPL	chr5:177574403:177574492:-@chr5:177572580:177572710:-@chr5:177568587:177571577:-	0.15	0.22	0.35	0.04	0.08	0.09	0.07	0.24	0.09	0.35	0.04	0.15	up
PIGO	chr9:35080463:35080669:-@chr9:35080063:35080281:-@chr9:35079377:35079447:-	0.84	0.77	0.87	0.73	0.74	0.68	0.716667	0.826667	0.74	0.87	0.68	0.77	up
PLAGL1	chr6:144327617:144331289:-@chr6:144323303:144323410:-@chr6:144310815:144311290:-	0.55	0.52	0.46	0.4	0.29	0.44	0.376667	0.51	0.44	0.55	0.29	0.46	up
PLEKHJ1	chr19:2184995:2185060:-@chr19:2184153:2184904:-	0.2	0.08	0.18	0.22	0.31	0.32	0.283333	0.153333	0.32	0.2	0.22	0.08	down
POFUT2	chr21:45511933:45512056:-@chr21:45510365:45510570:-@chr21:45508271:45509978:-	0.13	0.11	0.11	0.25	0.33	0.2	0.26	0.116667	0.33	0.13	0.2	0.11	down
POLM	chr7:44084935:44084880|44084864:-@chr7:44079907:44080654:-	0.39	0.36	0.38	0.55	0.51	0.44	0.5	0.376667	0.55	0.39	0.44	0.36	down
POLR2J2	chr7:102096598:102096687:-@chr7:102093846|102094947:102093760:-	0.42	0.41	0.51	0.59	0.7	0.74	0.676667	0.446667	0.74	0.51	0.59	0.41	down
POLR2J2	chr7:102096598:102096687:-@chr7:102094773:102094947:-@chr7:102093760:102093846:-	0.64	0.65	0.74	0.78	0.84	0.87	0.83	0.676667	0.87	0.74	0.78	0.64	down
PPP1R12A	chr12:78725137:78725266:-@chr12:78724077:78724244:-@chr12:78723503:78723679:-	0.63	0.59	0.75	0.57	0.55	0.4	0.506667	0.656667	0.57	0.75	0.4	0.59	up
PRPF40B	chr12:48317193:48317874:+@chr12:48321958|48321979:48322074:+	0.86	0.86	0.87	0.61	0.7	0.63	0.646667	0.863333	0.7	0.87	0.61	0.86	up
PSMA6	chr14:34851838:34852020|34852010:+@chr14:34853318:34853412:+	0.68	0.75	0.69	0.82	0.88	0.8	0.833333	0.706667	0.88	0.75	0.8	0.68	down
PTGR1	chr9:113372192:113372310:-@chr9:113366258:113366363:-@chr9:113364675:113365332:-	0.3	0.26	0.2	0.49	0.33	0.34	0.386667	0.253333	0.49	0.3	0.33	0.2	down
PTK6	chr20:61635348:61635501:-@chr20:61634464|61634484:61634323:-	0.82	0.9	0.88	0.74	0.62	0.77	0.71	0.866667	0.77	0.9	0.62	0.82	up
PVT1	chr8:128875942:128876162:+@chr8:128877322:128877436:+@chr8:128936583:128936747:+	0.15	0.38	0.23	0.46	0.48	0.4	0.446667	0.253333	0.48	0.38	0.4	0.15	down
PXK	chr3:58370857:58370926:+@chr3:58373671:58373730:+@chr3:58385519:58386787:+	0.69	0.78	0.78	0.62	0.48	0.64	0.58	0.75	0.64	0.78	0.48	0.69	up
R3HDM4	chr19:864087:864245:-@chr19:853519:853627:-@chr19:852976:853434:-	0.66	0.77	0.71	0.55	0.58	0.62	0.583333	0.713333	0.62	0.77	0.55	0.66	up
RAB9A	chrX:13617137:13617328:+@chrX:13631775:13631942:+@chrX:13636761:13638982:+	0.51	0.5	0.48	0.69	0.63	0.56	0.626667	0.496667	0.69	0.51	0.56	0.48	down
RABGGTB	chr1:76024306:76024547:+@chr1:76024973:76025138:+@chr1:76025770:76028790:+	0.63	0.63	0.83	0.58	0.46	0.5	0.513333	0.696667	0.58	0.83	0.46	0.63	up
RABGGTB	chr1:76024306:76024547:+@chr1:76024973:76025070:+@chr1:76025770:76028790:+	0.39	0.64	0.76	0.24	0.24	0.16	0.213333	0.596667	0.24	0.76	0.16	0.39	up
RBM10	chrX:46924223:46924383|46924380:+@chrX:46924555:46924652:+	0.48	0.53	0.5	0.42	0.47	0.26	0.383333	0.503333	0.47	0.53	0.26	0.48	up
RBX1	chr22:39679406:39679583:+@chr22:39681237:39681396:+@chr22:39689997:39690989:+	0.28	0.35	0.43	0.21	0.24	0.23	0.226667	0.353333	0.24	0.43	0.21	0.28	up
REPS1	chr6:139292807:139292928:-@chr6:139289231:139289308:-@chr6:139283867:139283954:-	0.37	0.36	0.54	0.21	0.13	0.16	0.166667	0.423333	0.21	0.54	0.13	0.36	up
REPS1	chr6:139292807:139292928:-@chr6:139289227:139289311:-@chr6:139283867:139283954:-	0.48	0.23	0.45	0.17	0.09	0.15	0.136667	0.386667	0.17	0.48	0.09	0.23	up
REPS1	chr6:139292807:139292928:-@chr6:139289231:139289311:-@chr6:139283867:139283954:-	0.73	0.63	0.77	0.48	0.37	0.36	0.403333	0.71	0.48	0.77	0.36	0.63	up
RPAIN	chr17:5266813:5266873:+@chr17:5270015|5272115:5272255:+	0.33	0.33	0.41	0.58	0.62	0.61	0.603333	0.356667	0.62	0.41	0.58	0.33	down
RRNAD1	chr1:154969793:154969936:+@chr1:154970425:154970468:+@chr1:154972141:154972325:+	0.64	0.52	0.47	0.75	0.79	0.8	0.78	0.543333	0.8	0.64	0.75	0.47	down
RRNAD1	chr1:154969793:154969936:+@chr1:154970425:154970909:+@chr1:154972141:154972325:+	0.69	0.56	0.46	0.73	0.79	0.79	0.77	0.57	0.79	0.69	0.73	0.46	down
RWDD3	chr1:95482355:95482842|95482795:+@chr1:95484686:95484801:+	0.55	0.5	0.44	0.61	0.63	0.58	0.606667	0.496667	0.63	0.55	0.58	0.44	down
SAFB	chr19:5599027:5599054:+@chr19:5600000:5600510:+@chr19:5600937:5600986:+	0.54	0.5	0.61	0.35	0.41	0.47	0.41	0.55	0.47	0.61	0.35	0.5	up
SDR39U1	chr14:23981392:23981821:-@chr14:23981224:23981306:-@chr14:23979829:23980841:-	0.79	0.84	0.65	0.92	0.91	0.95	0.926667	0.76	0.95	0.84	0.91	0.65	down
SDR39U1	chr14:23981392:23981821:-@chr14:23981155:23981306:-@chr14:23979829:23980841:-	0.41	0.73	0.57	0.84	0.83	0.82	0.83	0.57	0.84	0.73	0.82	0.41	down
SDR39U1	chr14:23981392:23981821:-@chr14:23981144:23981306:-@chr14:23979829:23980841:-	0.37	0.75	0.58	0.84	0.79	0.86	0.83	0.566667	0.86	0.75	0.79	0.37	down
SH3YL1	chr2:250085:252786:-@chr2:246207:246690:-@chr2:243005:243115:-	0.1	0.09	0.09	0.27	0.13	0.39	0.263333	0.0933333	0.39	0.1	0.13	0.09	down
SIGMAR1	chr9:34627264:34627417:-@chr9:34626994:34627086:-	0.68	0.66	0.78	0.61	0.64	0.49	0.58	0.706667	0.64	0.78	0.49	0.66	up
SIRT2	chr19:44063377:44063301|44063297:-@chr19:44061042:44063216:-	0.32	0.52	0.43	0.25	0.3	0.28	0.276667	0.423333	0.3	0.52	0.25	0.32	up
SLC29A2	chr11:65892584:65893579:-@chr11:65891916|65891933:65891819:-	0.08	0.04	0.06	0.12	0.12	0.28	0.173333	0.06	0.28	0.08	0.12	0.04	down
SLC29A2	chr11:65893416:65893588:-@chr11:65893178|65893246:65893107:-	0.93	0.89	0.93	0.75	0.75	0.78	0.76	0.916667	0.78	0.93	0.75	0.89	up
SLC29A2	chr11:65893107:65893246:-@chr11:65892584:65892718:-@chr11:65891819:65891916:-	0.87	0.93	0.92	0.86	0.73	0.61	0.733333	0.906667	0.86	0.93	0.61	0.87	up
SLC29A3	chr10:72752513:72752817:+@chr10:72781325:72781551:+@chr10:72785844:72786208:+	0.91	0.9	0.91	0.66	0.87	0.87	0.8	0.906667	0.87	0.91	0.66	0.9	up
SLC41A3	chr3:127269480:127269779:-@chr3:127252431:127252583:-@chr3:127235140:127235211:-	0.53	0.6	0.58	0.49	0.41	0.46	0.453333	0.57	0.49	0.6	0.41	0.53	up
SLK	chr10:105757925:105758104:+@chr10:105760564:105760656:+@chr10:105767908:105768037:+	0.62	0.65	0.68	0.47	0.49	0.5	0.486667	0.65	0.5	0.68	0.47	0.62	up
SLX1B-SULT1A4	chr16:29378695:29378807:+@chr16:29380173|29380204:29380355:+	0.06	0.06	0.07	0.21	0.15	0.16	0.173333	0.0633333	0.21	0.07	0.15	0.06	down
SMTN	chr22:29821520:29821595:+@chr22:29821838:29822883:+	0.67	0.45	0.53	0.81	0.85	0.74	0.8	0.55	0.85	0.67	0.74	0.45	down
SNHG1	chr11:62378567:62378986:-@chr11:62377881|62378112:62377849:-	0.59	0.77	0.5	0.83	0.78	0.83	0.813333	0.62	0.83	0.77	0.78	0.5	down
SNHG1	chr11:62379181:62379819:-@chr11:62378567:62378599:-@chr11:62377849:62378112:-	0.51	0.54	0.59	0.82	0.71	0.65	0.726667	0.546667	0.82	0.59	0.65	0.51	down
SNORD2	chr3:187984915:187985179:+@chr3:187985519:187985584:+@chr3:187986366:187987128:+	0.55	0.55	0.52	0.44	0.47	0.39	0.433333	0.54	0.47	0.55	0.39	0.52	up
SNORD23	chr19:52950417:52950592:+@chr19:52950825|52951597:52951673:+	0.49	0.54	0.63	0.77	0.75	0.64	0.72	0.553333	0.77	0.63	0.64	0.49	down
SNORD88C	chr19:55999641:56000043:-@chr19:55997523:55997683:-@chr19:55997058:55997326:-	0.66	0.6	0.57	0.86	0.83	0.84	0.843333	0.61	0.86	0.66	0.83	0.57	down
SPIN2B	chrX:57164451:57164705:-@chrX:57163789|57163792:57162838:-	0.76	0.57	0.61	0.56	0.52	0.4	0.493333	0.646667	0.56	0.76	0.4	0.57	up
SRRM2	chr16:2758359:2760467:+@chr16:2760609|2760612:2760719:+	0.76	0.59	0.67	0.78	0.83	0.86	0.823333	0.673333	0.86	0.76	0.78	0.59	down
SRSF11	chr1:70443941:70444051:+@chr1:70459883|70459886:70460110:+	0.32	0.31	0.43	0.52	0.48	0.56	0.52	0.353333	0.56	0.43	0.48	0.31	down
ST5	chr11:8789370:8789464:-@chr11:8708073:8709332:-@chr11:8704196:8704332:-	0.92	0.9	0.88	0.82	0.82	0.69	0.776667	0.9	0.82	0.92	0.69	0.88	up
STARD3	chr17:35063260:35063529:+@chr17:35066689:35066864:+@chr17:35067554:35067678:+	0.29	0.29	0.24	0.19	0.13	0.17	0.163333	0.273333	0.19	0.29	0.13	0.24	up
STARD3	chr17:35063260:35063529:+@chr17:35066677:35066864:+@chr17:35067554:35067678:+	0.28	0.26	0.23	0.15	0.12	0.13	0.133333	0.256667	0.15	0.28	0.12	0.23	up
STARD3NL	chr7:38207840:38208092|38207956:+@chr7:38213573:38214178:+	0.11	0.2	0.16	0.29	0.43	0.29	0.336667	0.156667	0.43	0.2	0.29	0.11	down
STAU1	chr20:47224139:47224419:-@chr20:47222403:47222545:-@chr20:47208883:47209090:-@chr20:47203877:47204015:-	0.63	0.68	0.67	0.87	0.76	0.74	0.79	0.66	0.87	0.68	0.74	0.63	down
STK19	chr6:32047625:32047972:+@chr6:32048058:32048267:+	0.77	0.71	0.84	0.64	0.67	0.68	0.663333	0.773333	0.68	0.84	0.64	0.71	up
STRBP	chr9:125070536:125070738:-@chr9:125038930:125039069:-@chr9:124986232:124986398:-	0.33	0.39	0.49	0.29	0.29	0.24	0.273333	0.403333	0.29	0.49	0.24	0.33	up
STRBP	chr9:125070536:125070738:-@chr9:125038930:125039066:-@chr9:124986232:124986398:-	0.38	0.4	0.42	0.27	0.31	0.21	0.263333	0.4	0.31	0.42	0.21	0.38	up
SULT1A4	chr16:29378695:29378807:+@chr16:29380173|29380204:29380355:+	0.06	0.06	0.07	0.21	0.15	0.16	0.173333	0.0633333	0.21	0.07	0.15	0.06	down
SUMF2	chr7:56108184:56108298:+@chr7:56109773:56109939:+@chr7:56112021:56112076:+	0.8	0.68	0.79	0.58	0.51	0.64	0.576667	0.756667	0.64	0.8	0.51	0.68	up
SUOX	chr12:54681151:54682322:+@chr12:54682655:54682771:+@chr12:54683669:54685578:+	0.89	0.78	0.8	0.7	0.76	0.54	0.666667	0.823333	0.76	0.89	0.54	0.78	up
SYMPK	chr19:51024153:51024303:-@chr19:51022935:51023016:-	0.72	0.72	0.71	0.29	0.7	0.51	0.5	0.716667	0.7	0.72	0.29	0.71	up
SYS1	chr20:43425082:43425369:+@chr20:43425606|43425640:43425747:+	0.79	0.81	0.86	0.62	0.67	0.71	0.666667	0.82	0.71	0.86	0.62	0.79	up
SYS1-DBNDD2	chr20:43425082:43425369:+@chr20:43425606|43425640:43425747:+	0.79	0.81	0.86	0.62	0.67	0.71	0.666667	0.82	0.71	0.86	0.62	0.79	up
TBC1D31	chr8:124222182:124222322:+@chr8:124223683:124223877:+@chr8:124226138:124226276:+	0.51	0.69	0.56	0.77	0.81	0.77	0.783333	0.586667	0.81	0.69	0.77	0.51	down
TBC1D31	chr8:124211619:124211754:+@chr8:124215535:124215627:+@chr8:124222182:124222390:+	0.9	0.84	0.91	0.82	0.79	0.68	0.763333	0.883333	0.82	0.91	0.68	0.84	up
TCF7L2	chr10:114907522:114907818:+@chr10:114908416:114908466:+@chr10:114910368:114910440:+@chr10:114915304:114917427:+	0.62	0.59	0.54	0.66	0.77	0.63	0.686667	0.583333	0.77	0.62	0.63	0.54	down
TEP1	chr14:19911010:19911146:-@chr14:19910732:19910856:-@chr14:19909488:19909631:-	0.8	0.9	0.86	0.71	0.79	0.67	0.723333	0.853333	0.79	0.9	0.67	0.8	up
THOC3	chr5:175320660:175320760:-@chr5:175319529:175319741:-@chr5:175277414:175277781:-	0.89	0.84	0.89	0.78	0.75	0.78	0.77	0.873333	0.78	0.89	0.75	0.84	up
TIAF1	chr17:24437582:24437944:-@chr17:24436748:24436792:-@chr17:24433460:24433582:-	0.15	0.07	0.07	0.4	0.44	0.41	0.416667	0.0966667	0.44	0.15	0.4	0.07	down
TPGS2	chr18:32662644:32663353:-@chr18:32657764:32657832:-@chr18:32654929:32655090:-@chr18:32652479:32652934:-	0.2	0.24	0.2	0.39	0.33	0.3	0.34	0.213333	0.39	0.24	0.3	0.2	down
TPRKB	chr2:73815064:73815226:-@chr2:73813219:73813335:-@chr2:73811822:73812920:-	0.44	0.47	0.44	0.29	0.32	0.43	0.346667	0.45	0.43	0.47	0.29	0.44	up
TPRKB	chr2:73817937:73818035:-@chr2:73815163:73815226:-@chr2:73811822:73812920:-	0.75	0.76	0.61	0.9	0.82	0.81	0.843333	0.706667	0.9	0.76	0.81	0.61	down
TPRKB	chr2:73815064:73815226:-@chr2:73813219:73813316:-@chr2:73811822:73812920:-	0.23	0.27	0.28	0.09	0.17	0.17	0.143333	0.26	0.17	0.28	0.09	0.23	up
TRAPPC2L	chr16:87452528:87452698:+@chr16:87453254:87453352:+@chr16:87453482:87453659:+	0.68	0.55	0.67	0.23	0.22	0.2	0.216667	0.633333	0.23	0.68	0.2	0.55	up
TRMT1	chr19:13088245:13088001|13087986:-@chr19:13087453:13087866:-	0.78	0.79	0.85	0.41	0.5	0.57	0.493333	0.806667	0.57	0.85	0.41	0.78	up
TRPT1	chr11:63750098:63750301:-@chr11:63749834:63749917:-@chr11:63748591:63749628:-	0.65	0.61	0.64	0.46	0.4	0.45	0.436667	0.633333	0.46	0.65	0.4	0.61	up
TRPT1	chr11:63748333:63748765:-@chr11:63748148:63748210:-@chr11:63747433:63748015:-	0.9	0.85	0.84	0.65	0.7	0.71	0.686667	0.863333	0.71	0.9	0.65	0.84	up
TRPT1	chr11:63750098:63750301:-@chr11:63749018|63749628:63748849:-	0.56	0.6	0.54	0.65	0.79	0.87	0.77	0.566667	0.87	0.6	0.65	0.54	down
UAP1	chr1:160826737:160826925:+@chr1:160829146|160829149:160829196:+	0.74	0.8	0.78	0.7	0.64	0.65	0.663333	0.773333	0.7	0.8	0.64	0.74	up
UBAC2	chr13:98688682:98688809:+@chr13:98694770:98694879:+@chr13:98764352:98764475:+	0.82	0.84	0.9	0.7	0.73	0.65	0.693333	0.853333	0.73	0.9	0.65	0.82	up
UCKL1	chr20:62047958:62048064:-@chr20:62047602:62047796:-	0.29	0.26	0.26	0.33	0.58	0.45	0.453333	0.27	0.58	0.29	0.33	0.26	down
USP16	chr21:29330463:29330566:+@chr21:29331468|29331471:29331655:+	0.77	0.66	0.66	0.51	0.56	0.53	0.533333	0.696667	0.56	0.77	0.51	0.66	up
VPS28	chr8:145624680:145624755:-@chr8:145623462|145623482:145623100:-	0.5	0.59	0.67	0.86	0.7	0.85	0.803333	0.586667	0.86	0.67	0.7	0.5	down
VPS28	chr8:145621137:145621963:-@chr8:145620909:145621010:-	0.26	0.19	0.25	0.47	0.36	0.3	0.376667	0.233333	0.47	0.26	0.3	0.19	down
WASF3	chr13:26144009:26144126:+@chr13:26148686:26148861:+@chr13:26152172:26152338:+@chr13:26153191:26153457:+	0.87	0.93	0.91	0.68	0.6	0.78	0.686667	0.903333	0.78	0.93	0.6	0.87	up
WASH2P	chr2:114070428:114070629|114070625:+@chr2:114070718:114072513:+	0.44	0.37	0.39	0.21	0.16	0.21	0.193333	0.4	0.21	0.44	0.16	0.37	up
WDR73	chr15:82992772:82992860:-@chr15:82992125:82992189:-	0.09	0.18	0.23	0.04	0.04	0.05	0.0433333	0.166667	0.05	0.23	0.04	0.09	up
WIPI2	chr7:5196342:5196650:+@chr7:5199275:5199328:+@chr7:5205733:5205815:+	0.41	0.26	0.39	0.56	0.46	0.55	0.523333	0.353333	0.56	0.41	0.46	0.26	down
WNK2	chr9:95070614:95070849:+@chr9:95070943:95071053:+@chr9:95090891:95091723:+	0.04	0.08	0.09	0.49	0.19	0.14	0.273333	0.07	0.49	0.09	0.14	0.04	down
XPNPEP3	chr22:39679406:39679583:+@chr22:39681237:39681396:+@chr22:39689997:39690989:+	0.28	0.35	0.43	0.21	0.24	0.23	0.226667	0.353333	0.24	0.43	0.21	0.28	up
YIPF3	chr6:43591417:43591322|43591311:-@chr6:43588477:43589349:-	0.92	0.9	0.89	0.81	0.87	0.71	0.796667	0.903333	0.87	0.92	0.71	0.89	up
ZBTB38	chr3:142605459:142605563:+@chr3:142639775:142639897:+@chr3:142643921:142651324:+	0.36	0.35	0.29	0.25	0.17	0.21	0.21	0.333333	0.25	0.36	0.17	0.29	up
ZMYND8	chr20:45418808:45419040:-@chr20:45410007:45410077:-@chr20:45372207:45372355:-	0.94	0.96	0.96	0.8	0.9	0.84	0.846667	0.953333	0.9	0.96	0.8	0.94	up
ZNF195	chr11:3348781:3348952:-@chr11:3339549:3339695:-@chr11:3335732:3338371:-	0.58	0.48	0.49	0.64	0.6	0.69	0.643333	0.516667	0.69	0.58	0.6	0.48	down
ZNF232	chr17:4955095:4955238:-@chr17:4953787|4953887:4953413:-	0.71	0.7	0.47	0.72	0.75	0.83	0.766667	0.626667	0.83	0.71	0.72	0.47	down
ZNF397	chr18:31074996:31075071:+@chr18:31076353:31076846:+@chr18:31077114:31078062:+	0.83	0.87	0.89	0.69	0.78	0.74	0.736667	0.863333	0.78	0.89	0.69	0.83	up
ZNF655	chr7:98996066:98996254:+@chr7:99007247:99007351:+@chr7:99007804:99012013:+	0.39	0.41	0.41	0.45	0.6	0.71	0.586667	0.403333	0.71	0.41	0.45	0.39	down
ZSCAN26	chr6:28347611:28347691:+@chr6:28348426:28348543:+	0.63	0.35	0.5	0.09	0.17	0.18	0.146667	0.493333	0.18	0.63	0.09	0.35	up
ZSCAN31	chr6:28429618:28432026:-@chr6:28412546:28412699:-@chr6:28404917:28405534:-	0.89	0.78	0.83	0.67	0.66	0.73	0.686667	0.833333	0.73	0.89	0.66	0.78	up
ZSCAN31	chr6:28429618:28432026:-@chr6:28413512:28413649:-@chr6:28412546:28412699:-	0.17	0.22	0.13	0.42	0.38	0.45	0.416667	0.173333	0.45	0.22	0.38	0.13	down
ZSCAN31	chr6:28429618:28432026:-@chr6:28429074:28429238:-@chr6:28412546:28412699:-	0.21	0.31	0.28	0.41	0.61	0.4	0.473333	0.266667	0.61	0.31	0.4	0.21	down
ZSCAN31	chr6:28429618:28432026:-@chr6:28413555:28413649:-@chr6:28412546:28412699:-	0.22	0.25	0.14	0.27	0.5	0.31	0.36	0.203333	0.5	0.25	0.27	0.14	down

## Sheet: QKI_OL_with_SW480
Supplementary File 2. List of alternative splicing targets both in QKI knocking down CAL27 line and HCT116 EpCAMhi/lo , filtered by ΔPSI > 0.1
symbol	event_name	psi_CAL27_QKI_KD_1	psi_CAL27_QKI_KD_2	psi_CAL27_QKI_KD_3	psi_CAL27_WT_1	psi_CAL27_WT_2	psi_CAL27_WT_3	psi_mean_group1	psi_mean_group2	psi_max_group1	psi_max_group2	psi_min_group1	psi_min_group2	change_type
ABCA11P	chr4:456364:456490:-@chr4:421235:421300:-@chr4:406991:410908:-	0.45	0.42	0.38	0.7	0.68	0.65	0.676667	0.416667	0.7	0.45	0.65	0.38	down
ABCA11P	chr4:456364:456490:-@chr4:451406:451470:-@chr4:423192:428221:-	0.16	0.15	0.11	0.26	0.25	0.45	0.32	0.14	0.45	0.16	0.25	0.11	down
ABCA11P	chr4:421235:421300:-@chr4:419559:419668:-@chr4:406991:410908:-	0.78	0.71	0.67	0.6	0.63	0.6	0.61	0.72	0.63	0.78	0.6	0.67	up
ABHD11	chr7:72790001:72789828|72789487:-@chr7:72789123:72789376:-	0.71	0.84	0.74	0.65	0.58	0.57	0.6	0.763333	0.65	0.84	0.57	0.71	up
ABHD11	chr7:72789828:72790064:-@chr7:72789195:72789486:-@chr7:72788360:72788957:-	0.65	0.67	0.62	0.77	0.79	0.77	0.776667	0.646667	0.79	0.67	0.77	0.62	down
ACAA1	chr3:38143195:38143005|38142657:-@chr3:38142321:38142376:-	0.42	0.5	0.46	0.39	0.27	0.27	0.31	0.46	0.39	0.5	0.27	0.42	up
ACAA1	chr3:38143005:38143195:-@chr3:38142657:38142836:-@chr3:38142321:38142376:-	0.8	0.89	0.79	0.68	0.59	0.74	0.67	0.826667	0.74	0.89	0.59	0.79	up
ACAD9	chr3:130081024:130081550:+@chr3:130086186|130086190:130086279:+	0.86	0.76	0.67	0.58	0.62	0.43	0.543333	0.763333	0.62	0.86	0.43	0.67	up
AGPAT3	chr21:44204941:44205088:+@chr21:44212178|44212255:44212424:+	0.16	0.07	0.12	0.23	0.21	0.25	0.23	0.116667	0.25	0.16	0.21	0.07	down
AGPAT3	chr21:44203943:44204168|44204056:+@chr21:44212255:44212424:+	0.92	0.94	0.93	0.86	0.78	0.85	0.83	0.93	0.86	0.94	0.78	0.92	up
AIM1L	chr1:26542823:26545790:-@chr1:26542369|26542371:26542324:-	0.73	0.82	0.79	0.89	0.86	0.92	0.89	0.78	0.92	0.82	0.86	0.73	down
AP1G1	chr16:70399419:70399698:-@chr16:70380884|70380886:70380683:-	0.61	0.47	0.5	0.86	0.86	0.84	0.853333	0.526667	0.86	0.61	0.84	0.47	down
ARAP1	chr11:72082018:72082163:-@chr11:72081446:72081478:-@chr11:72077148:72077230:-	0.6	0.56	0.54	0.42	0.34	0.48	0.413333	0.566667	0.48	0.6	0.34	0.54	up
ARAP1	chr11:72181568:72182861:-@chr11:72179030:72179083:-@chr11:72169339:72169987:-	0.22	0.19	0.13	0.29	0.32	0.3	0.303333	0.18	0.32	0.22	0.29	0.13	down
ATAT1	chr6:30716133:30718003:+@chr6:30718524:30718767:+@chr6:30721651:30721865:+	0.44	0.38	0.41	0.66	0.82	0.71	0.73	0.41	0.82	0.44	0.66	0.38	down
ATF3	chr1:210854987:210855025:+@chr1:210855113:210855226:+	0.76	0.78	0.89	0.64	0.66	0.72	0.673333	0.81	0.72	0.89	0.64	0.76	up
ATF3	chr1:210854983:210855393|210855226:+@chr1:210858092:210859212:+	0.21	0.21	0.12	0.04	0.09	0.08	0.07	0.18	0.09	0.21	0.04	0.12	up
ATF3	chr1:210859011:210859231:+@chr1:210859323:210859520:+	0.95	0.96	0.97	0.79	0.74	0.9	0.81	0.96	0.9	0.97	0.74	0.95	up
ATP6V0E2	chr7:149203566:149203667:+@chr7:149206700:149206768:+@chr7:149207357:149208732:+	0.12	0.12	0.13	0.24	0.26	0.29	0.263333	0.123333	0.29	0.13	0.24	0.12	down
B3GALNT1	chr3:162303909:162303999:-@chr3:162303595:162303687:-@chr3:162301550:162301715:-	0.25	0.12	0.25	0.3	0.35	0.41	0.353333	0.206667	0.41	0.25	0.3	0.12	down
BAIAP2	chr17:76696859:76696904:+@chr17:76699309:76699354:+@chr17:76704165:76704620:+	0.45	0.37	0.44	0.56	0.53	0.49	0.526667	0.42	0.56	0.45	0.49	0.37	down
BAZ2B	chr2:159997514:159998908:-@chr2:159995620:159995913:-@chr2:159993957:159994017:-	0.93	0.93	0.92	0.86	0.6	0.91	0.79	0.926667	0.91	0.93	0.6	0.92	up
BAZ2B	chr2:159997514:159998908:-@chr2:159995659:159995913:-@chr2:159993957:159994017:-	0.9	0.91	0.89	0.6	0.7	0.86	0.72	0.9	0.86	0.91	0.6	0.89	up
BAZ2B	chr2:159997514:159998908:-@chr2:159995752:159995913:-@chr2:159993957:159994017:-	0.68	0.89	0.89	0.67	0.62	0.63	0.64	0.82	0.67	0.89	0.62	0.68	up
BCL2L12	chr19:54863920:54864006:+@chr19:54864093:54864184:+@chr19:54868767:54868990:+	0.84	0.8	0.77	0.56	0.69	0.58	0.61	0.803333	0.69	0.84	0.56	0.77	up
BICD2	chr9:94517356:94517566:-@chr9:94513466:94515564:-	0.37	0.34	0.41	0.2	0.21	0.21	0.206667	0.373333	0.21	0.41	0.2	0.34	up
BMP1	chr8:22110698:22110878:+@chr8:22112722:22112845:+@chr8:22114576:22115386:+	0.1	0.12	0.12	0.18	0.21	0.27	0.22	0.113333	0.27	0.12	0.18	0.1	down
C19orf60	chr19:18560805:18560887:+@chr19:18561289:18561493:+	0.65	0.72	0.66	0.56	0.58	0.58	0.573333	0.676667	0.58	0.72	0.56	0.65	up
C1orf131	chr1:229441226:229441557:-@chr1:229431519:229431575:-@chr1:229429342:229429437:-	0.81	0.86	0.82	0.68	0.78	0.59	0.683333	0.83	0.78	0.86	0.59	0.81	up
CABYR	chr18:19977322:19977375:+@chr18:19984500:19984586:+@chr18:19989663:19990961:+	0.23	0.17	0.18	0.32	0.39	0.33	0.346667	0.193333	0.39	0.23	0.32	0.17	down
CABYR	chr18:19989663:19990961:+@chr18:19993905|19993908:19994031:+	0.61	0.53	0.54	0.47	0.39	0.49	0.45	0.56	0.49	0.61	0.39	0.53	up
CABYR	chr18:19977322:19977375:+@chr18:19984500:19984593:+@chr18:19989663:19990961:+	0.25	0.24	0.25	0.31	0.44	0.38	0.376667	0.246667	0.44	0.25	0.31	0.24	down
CALHM2	chr10:105201903:105202152:-@chr10:105200830:105201032:-@chr10:105198861:105200547:-	0.74	0.59	0.53	0.5	0.42	0.2	0.373333	0.62	0.5	0.74	0.2	0.53	up
CALML4	chr15:66284637:66287802:-@chr15:66284513:66284543:-@chr15:66278933:66279073:-	0.37	0.39	0.59	0.26	0.15	0.11	0.173333	0.45	0.26	0.59	0.11	0.37	up
CCDC183	chr9:138822013:138822599:+@chr9:138823528:138823702:+@chr9:138823961:138824315:+	0.19	0.35	0.18	0.16	0.1	0.13	0.13	0.24	0.16	0.35	0.1	0.18	up
CCNC	chr6:100098870:100098803|100098776:-@chr6:100096978:100098206:-	0.39	0.44	0.59	0.23	0.28	0.2	0.236667	0.473333	0.28	0.59	0.2	0.39	up
CD44	chr11:35167785:35168188:+@chr11:35184235:35184366:+@chr11:35186228:35186329:+	0.4	0.45	0.42	0.3	0.28	0.3	0.293333	0.423333	0.3	0.45	0.28	0.4	up
CD46	chr1:206006981:206010330|206007163:+@chr1:206023260:206023983:+	0.51	0.45	0.46	0.59	0.71	0.77	0.69	0.473333	0.77	0.51	0.59	0.45	down
CD46	chr1:206025039:206025074:+@chr1:206025587:206025650:+@chr1:206033487:206035484:+	0.89	0.91	0.94	0.83	0.77	0.83	0.81	0.913333	0.83	0.94	0.77	0.89	up
CD47	chr3:109252115:109252187:-@chr3:109251156:109251188:-@chr3:109244629:109248829:-	0.68	0.67	0.68	0.23	0.19	0.34	0.253333	0.676667	0.34	0.68	0.19	0.67	up
CD47	chr3:109253476:109255521:-@chr3:109252115:109252139:-@chr3:109244629:109248829:-	0.42	0.49	0.33	0.23	0.3	0.26	0.263333	0.413333	0.3	0.49	0.23	0.33	up
CDK5RAP3	chr17:43406765:43406813:+@chr17:43407537:43407702:+	0.78	0.72	0.69	0.38	0.67	0.65	0.566667	0.73	0.67	0.78	0.38	0.69	up
CENPK	chr5:64893147:64893080|64893046:-@chr5:64886380:64886529:-	0.86	0.68	0.73	0.65	0.61	0.59	0.616667	0.756667	0.65	0.86	0.59	0.68	up
CENPK	chr5:64893080:64893147:-@chr5:64886380:64886529:-@chr5:64884076:64884132:-	0.76	0.66	0.67	0.43	0.6	0.52	0.516667	0.696667	0.6	0.76	0.43	0.66	up
CEP41	chr7:129855032:129855095:-@chr7:129853723:129853836:-@chr7:129845927:129849084:-	0.31	0.47	0.4	0.48	0.58	0.64	0.566667	0.393333	0.64	0.47	0.48	0.31	down
CIB1	chr15:88577905:88577939:-@chr15:88576563|88576683:88576455:-	0.24	0.26	0.1	0.05	0.07	0.09	0.07	0.2	0.09	0.26	0.05	0.1	up
CIC	chr19:47489584:47489828:+@chr19:47489927|47489930:47490081:+	0.64	0.64	0.57	0.67	0.83	0.67	0.723333	0.616667	0.83	0.64	0.67	0.57	down
CLDN7	chr17:7104864:7106386:-@chr17:7104681:7104769:-@chr17:7102740:7104579:-	0.97	0.88	0.97	0.83	0.78	0.76	0.79	0.94	0.83	0.97	0.76	0.88	up
CLEC2D	chr12:9699736:9699842:+@chr12:9700431:9700560:+@chr12:9700784:9702285:+	0.38	0.45	0.43	0.57	0.47	0.6	0.546667	0.42	0.6	0.45	0.47	0.38	down
CLN6	chr15:66284637:66287802:-@chr15:66284513:66284543:-@chr15:66278933:66279073:-	0.37	0.39	0.59	0.26	0.15	0.11	0.173333	0.45	0.26	0.59	0.11	0.37	up
CLSTN1	chr1:9723739:9723905:-@chr1:9720143:9720199:-@chr1:9718530:9718687:-	0.13	0.11	0.11	0.29	0.33	0.3	0.306667	0.116667	0.33	0.13	0.29	0.11	down
CLSTN1	chr1:9755917:9756039:-@chr1:9739126:9739155:-@chr1:9737755:9737954:-	0.08	0.04	0.06	0.23	0.17	0.13	0.176667	0.06	0.23	0.08	0.13	0.04	down
CORO7-PAM16	chr16:4333209:4334334:-@chr16:4331585|4331674:4331370:-	0.85	0.84	0.72	0.93	0.89	0.95	0.923333	0.803333	0.95	0.85	0.89	0.72	down
CTNND1	chr11:57339439:57339548:+@chr11:57339963:57340049:+@chr11:57340345:57343233:+	0.32	0.33	0.33	0.05	0.08	0.06	0.0633333	0.326667	0.08	0.33	0.05	0.32	up
DDX11	chr12:31143988:31144908:+@chr12:31145200|31145228:31145331:+	0.13	0.27	0.22	0.1	0.08	0.11	0.0966667	0.206667	0.11	0.27	0.08	0.13	up
DDX11	chr12:31147137:31147221:+@chr12:31147518:31147596:+@chr12:31147778:31148992:+	0.86	0.9	0.89	0.8	0.78	0.76	0.78	0.883333	0.8	0.9	0.76	0.86	up
DDX11	chr12:31147137:31147221:+@chr12:31147523:31147596:+@chr12:31147778:31148992:+	0.61	0.76	0.74	0.52	0.52	0.54	0.526667	0.703333	0.54	0.76	0.52	0.61	up
DDX11	chr12:31146628:31146728:+@chr12:31147137:31147221:+@chr12:31147778:31148992:+	0.55	0.55	0.47	0.28	0.3	0.45	0.343333	0.523333	0.45	0.55	0.28	0.47	up
DEPDC1	chr1:68722221:68722361:-@chr1:68720317:68721168:-@chr1:68719711:68719883:-	0.49	0.58	0.54	0.26	0.29	0.26	0.27	0.536667	0.29	0.58	0.26	0.49	up
DEPDC1	chr1:68722221:68722361:-@chr1:68720912:68721168:-@chr1:68719711:68719883:-	0.28	0.36	0.34	0.11	0.1	0.11	0.106667	0.326667	0.11	0.36	0.1	0.28	up
DNASE1	chr16:3632894:3633038:+@chr16:3641319:3641923:+@chr16:3644963:3645046:+	0.38	0.64	0.57	0.75	0.78	0.78	0.77	0.53	0.78	0.64	0.75	0.38	down
DSCR3	chr21:37561409:37562294:-@chr21:37527533:37527613:-@chr21:37526516:37526622:-	0.8	0.78	0.84	0.54	0.44	0.71	0.563333	0.806667	0.71	0.84	0.44	0.78	up
DSCR3	chr21:37561409:37562294:-@chr21:37560963:37561018:-@chr21:37535868:37535985:-@chr21:37534478:37534810:-	0.2	0.24	0.15	0.33	0.26	0.33	0.306667	0.196667	0.33	0.24	0.26	0.15	down
ECHDC2	chr1:53146128:53146214:-@chr1:53143294:53144871:-@chr1:53142904:53143093:-	0.12	0.21	0.09	0.25	0.57	0.44	0.42	0.14	0.57	0.21	0.25	0.09	down
ECHDC2	chr1:53159813:53160179:-@chr1:53152155:53152355:-@chr1:53149983:53150050:-	0.86	0.81	0.86	0.59	0.61	0.68	0.626667	0.843333	0.68	0.86	0.59	0.81	up
ECHDC2	chr1:53142906:53145193:-@chr1:53137434:53137484:-@chr1:53135697:53135744:-	0.85	0.86	0.9	0.71	0.76	0.79	0.753333	0.87	0.79	0.9	0.71	0.85	up
ECHDC2	chr1:53146128:53146214:-@chr1:53143294:53146022:-@chr1:53142904:53143093:-	0.11	0.21	0.09	0.23	0.51	0.46	0.4	0.136667	0.51	0.21	0.23	0.09	down
EEF1D	chr8:144739532:144739603:-@chr8:144734641|144735019:144734599:-	0.41	0.29	0.45	0.1	0.24	0.19	0.176667	0.383333	0.24	0.45	0.1	0.29	up
EEF1D	chr8:144750661:144750988:-@chr8:144742621:144743394:-@chr8:144740042:144740162:-	0.41	0.33	0.38	0.53	0.61	0.49	0.543333	0.373333	0.61	0.41	0.49	0.33	down
EEF1D	chr8:144750661:144750988:-@chr8:144744048|144744051:144743921:-	0.43	0.48	0.57	0.77	0.8	0.82	0.796667	0.493333	0.82	0.57	0.77	0.43	down
EEF1D	chr8:144750661:144750988:-@chr8:144745960:144745973:-@chr8:144743921:144744051:-	0.44	0.6	0.28	0.2	0.16	0.16	0.173333	0.44	0.2	0.6	0.16	0.28	up
ELMOD3	chr2:85435710:85435804:+@chr2:85437601:85437886:+	0.26	0.18	0.08	0.31	0.58	0.45	0.446667	0.173333	0.58	0.26	0.31	0.08	down
ELMOD3	chr2:85435710:85435810:+@chr2:85437603:85437886:+	0.43	0.2	0.09	0.49	0.58	0.62	0.563333	0.24	0.62	0.43	0.49	0.09	down
ESYT2	chr7:158244938:158245033:-@chr7:158238233:158238295:-@chr7:158235101:158235175:-	0.79	0.87	0.88	0.31	0.39	0.31	0.336667	0.846667	0.39	0.88	0.31	0.79	up
EXOC7	chr17:71598819:71598911:-@chr17:71598005:71598157:-@chr17:71596851:71596996:-	0.22	0.13	0.18	0.29	0.31	0.39	0.33	0.176667	0.39	0.22	0.29	0.13	down
EXOC7	chr17:71595330:71596238:-@chr17:71594530:71594568:-@chr17:71593756:71593821:-	0.27	0.26	0.19	0.37	0.35	0.48	0.4	0.24	0.48	0.27	0.35	0.19	down
EXOC7	chr17:71602090:71602257:-@chr17:71598819:71598911:-@chr17:71598001:71598073:-	0.76	0.62	0.66	0.54	0.53	0.54	0.536667	0.68	0.54	0.76	0.53	0.62	up
EXOC7	chr17:71602090:71602257:-@chr17:71598005:71598073:-@chr17:71596851:71596996:-	0.22	0.25	0.2	0.33	0.39	0.34	0.353333	0.223333	0.39	0.25	0.33	0.2	down
FAM193B	chr5:176892050:176892248:-@chr5:176890889:176891128:-@chr5:176883792:176884812:-	0.47	0.47	0.53	0.55	0.64	0.62	0.603333	0.49	0.64	0.53	0.55	0.47	down
FAM219B	chr15:72984625:72984548|72984058:-@chr15:72979381:72982180:-	0.26	0.34	0.3	0.38	0.4	0.44	0.406667	0.3	0.44	0.34	0.38	0.26	down
FAM21A	chr10:51527441:51527568:+@chr10:51529744:51529830:+@chr10:51533808:51533909:+	0.69	0.66	0.7	0.33	0.61	0.5	0.48	0.683333	0.61	0.7	0.33	0.66	up
FAM234A	chr16:243833:243929:+@chr16:244329|244381:244681:+	0.06	0.07	0.13	0.33	0.42	0.21	0.32	0.0866667	0.42	0.13	0.21	0.06	down
FAM234A	chr16:239549:239654:+@chr16:244329|244388:244681:+	0.18	0.13	0.12	0.37	0.38	0.41	0.386667	0.143333	0.41	0.18	0.37	0.12	down
FIGNL1	chr7:50484915:50484755|50484692:-@chr7:50483373:50483481:-	0.3	0.27	0.32	0.43	0.46	0.34	0.41	0.296667	0.46	0.32	0.34	0.27	down
FIGNL1	chr7:50485493:50485582:-@chr7:50484692:50484915:-@chr7:50483373:50483481:-	0.75	0.85	0.65	0.64	0.45	0.63	0.573333	0.75	0.64	0.85	0.45	0.65	up
FIGNL1	chr7:50485493:50485582:-@chr7:50484737:50484915:-@chr7:50483373:50483481:-	0.76	0.84	0.73	0.65	0.41	0.65	0.57	0.776667	0.65	0.84	0.41	0.73	up
FIGNL1	chr7:50485493:50485582:-@chr7:50484310:50484915:-@chr7:50483373:50483481:-	0.74	0.78	0.61	0.58	0.35	0.54	0.49	0.71	0.58	0.78	0.35	0.61	up
FIGNL1	chr7:50484915:50484692|50484310:-@chr7:50483373:50483481:-	0.65	0.65	0.67	0.48	0.43	0.64	0.516667	0.656667	0.64	0.67	0.43	0.65	up
FIGNL1	chr7:50485493:50485582:-@chr7:50484771:50484915:-@chr7:50483373:50483481:-	0.73	0.77	0.71	0.65	0.39	0.63	0.556667	0.736667	0.65	0.77	0.39	0.71	up
FIGNL1	chr7:50485493:50485582:-@chr7:50484748:50484915:-@chr7:50483373:50483481:-	0.72	0.79	0.73	0.62	0.43	0.61	0.553333	0.746667	0.62	0.79	0.43	0.72	up
FOXO1	chr13:40137720:40138761:-@chr13:40105284:40105385:-@chr13:40034826:40034899:-@chr13:40031646:40032997:-	0.22	0.26	0.15	0.43	0.62	0.27	0.44	0.21	0.62	0.26	0.27	0.15	down
GALT	chr9:34637386:34637564:+@chr9:34637654:34637702:+@chr9:34637829:34637962:+	0.9	0.92	0.96	0.86	0.77	0.59	0.74	0.926667	0.86	0.96	0.59	0.9	up
GALT	chr9:34637086:34637564:+@chr9:34637654:34637958:+	0.39	0.57	0.57	0.68	0.62	0.83	0.71	0.51	0.83	0.57	0.62	0.39	down
GAS5	chr1:172100018:172101308:-@chr1:172059687:172059780:-@chr1:172046893:172047067:-	0.51	0.5	0.47	0.68	0.89	0.56	0.71	0.493333	0.89	0.51	0.56	0.47	down
GAS5	chr1:172101308:172101232|172100990:-@chr1:172099662:172100065:-	0.14	0.17	0.18	0.25	0.26	0.28	0.263333	0.163333	0.28	0.18	0.25	0.14	down
GATS	chr7:99659441:99659634:-@chr7:99658156:99658279:-@chr7:99636212:99638162:-	0.47	0.49	0.44	0.71	0.67	0.69	0.69	0.466667	0.71	0.49	0.67	0.44	down
GLYCTK	chr3:52300016:52300978|52300167:+@chr3:52301316:52304312:+	0.66	0.63	0.62	0.82	0.74	0.84	0.8	0.636667	0.84	0.66	0.74	0.62	down
GLYCTK	chr3:52301316:52302248:+@chr3:52302363:52302527:+	0.53	0.8	0.65	0.9	0.83	0.84	0.856667	0.66	0.9	0.8	0.83	0.53	down
GLYCTK	chr3:52296885:52296932:+@chr3:52299360:52299775:+@chr3:52300016:52300978:+	0.72	0.77	0.3	0.89	0.85	0.86	0.866667	0.596667	0.89	0.77	0.85	0.3	down
GORASP1	chr3:39117597:39117511|39117242:-@chr3:39116800:39116998:-	0.69	0.76	0.71	0.78	0.8	0.88	0.82	0.72	0.88	0.76	0.78	0.69	down
GORASP1	chr3:39117242:39117597:-@chr3:39116949|39116998:39116800:-	0.8	0.78	0.67	0.89	0.83	0.9	0.873333	0.75	0.9	0.8	0.83	0.67	down
GSN	chr9:123083569:123083661:+@chr9:123088182:123088284:+@chr9:123102164:123102225:+@chr9:123104023:123104266:+	0.14	0.15	0.14	0.33	0.28	0.19	0.266667	0.143333	0.33	0.15	0.19	0.14	down
GSN	chr9:123083925:123084052:+@chr9:123104023|123104070:123104266:+	0.34	0.67	0.54	0.77	0.86	0.7	0.776667	0.516667	0.86	0.67	0.7	0.34	down
GSN	chr9:123083569:123083661:+@chr9:123083974:123084052:+@chr9:123084538:123084649:+@chr9:123104070:123104266:+	0.1	0.29	0.19	0.47	0.5	0.3	0.423333	0.193333	0.5	0.29	0.3	0.1	down
GSN	chr9:123102091:123102225:+@chr9:123104023|123104062:123104266:+	0.25	0.21	0.33	0.42	0.35	0.35	0.373333	0.263333	0.42	0.33	0.35	0.21	down
GSN	chr9:123083569:123083661:+@chr9:123105010:123105164:+@chr9:123112783:123112944:+	0.94	0.93	0.95	0.78	0.89	0.79	0.82	0.94	0.89	0.95	0.78	0.93	up
GSN	chr9:123083569:123083661:+@chr9:123083974:123084052:+@chr9:123102164:123102225:+@chr9:123104023:123104266:+	0.29	0.2	0.28	0.51	0.39	0.39	0.43	0.256667	0.51	0.29	0.39	0.2	down
GSN	chr9:123083569:123083661:+@chr9:123083974:123084052:+@chr9:123102201:123102225:+@chr9:123104062:123104266:+	0.11	0.06	0.07	0.28	0.14	0.27	0.23	0.08	0.28	0.11	0.14	0.06	down
GSTK1	chr7:142672207:142672307:+@chr7:142672476:142672511:+	0.35	0.38	0.41	0.59	0.47	0.61	0.556667	0.38	0.61	0.41	0.47	0.35	down
HUWE1	chrX:53587654:53587572|53587527:-@chrX:53586129:53586225:-	0.62	0.56	0.61	0.44	0.55	0.46	0.483333	0.596667	0.55	0.62	0.44	0.56	up
JMJD8	chr16:674235:674530:-@chr16:673911:674156:-@chr16:673862:673910:-@chr16:673686:673782:-	0.43	0.45	0.4	0.26	0.34	0.34	0.313333	0.426667	0.34	0.45	0.26	0.4	up
JMJD8	chr16:673911:674156:-@chr16:673686:673782:-	0.31	0.49	0.55	0.71	0.65	0.6	0.653333	0.45	0.71	0.55	0.6	0.31	down
JMJD8	chr16:673862:674156:-@chr16:673686:673782:-	0.19	0.4	0.35	0.51	0.48	0.58	0.523333	0.313333	0.58	0.4	0.48	0.19	down
KIF13A	chr6:17880118:17880269:-@chr6:17879324:17879428:-@chr6:17871903:17873156:-	0.61	0.72	0.67	0.41	0.34	0.39	0.38	0.666667	0.41	0.72	0.34	0.61	up
KIFC3	chr16:56352139:56352368:-@chr16:56351141:56351249:-@chr16:56349151:56350322:-	0.43	0.52	0.44	0.53	0.57	0.65	0.583333	0.463333	0.65	0.52	0.53	0.43	down
KLHDC4	chr16:86353056:86353257:-@chr16:86346399|86347584:86346301:-	0.53	0.54	0.43	0.6	0.76	0.77	0.71	0.5	0.77	0.54	0.6	0.43	down
KRT15	chr17:36931463:36931701:-@chr17:36928239|36928275:36928108:-	0.76	0.79	0.78	0.58	0.56	0.67	0.603333	0.776667	0.67	0.79	0.56	0.76	up
KRT15	chr17:36931463:36931701:-@chr17:36929417:36929650:-@chr17:36928108:36928239:-	0.09	0.08	0.06	0.15	0.28	0.15	0.193333	0.0766667	0.28	0.09	0.15	0.06	down
LCAT	chr16:66535352:66536624:-@chr16:66534593|66534616:66534460:-	0.74	0.63	0.7	0.56	0.36	0.62	0.513333	0.69	0.62	0.74	0.36	0.63	up
LETMD1	chr12:49735885:49736552:+@chr12:49738056|49738074:49738178:+	0.71	0.57	0.66	0.4	0.4	0.39	0.396667	0.646667	0.4	0.71	0.39	0.57	up
LETMD1	chr12:49735885:49736552:+@chr12:49738056|49738125:49738178:+	0.42	0.56	0.35	0.22	0.28	0.27	0.256667	0.443333	0.28	0.56	0.22	0.35	up
LETMD1	chr12:49728347:49729235:+@chr12:49736037:49736071:+@chr12:49736194:49736295:+	0.6	0.83	0.69	0.48	0.44	0.37	0.43	0.706667	0.48	0.83	0.37	0.6	up
LINC01089	chr12:120724920:120726042:-@chr12:120724092|120724097:120723996:-	0.76	0.8	0.74	0.73	0.67	0.46	0.62	0.766667	0.73	0.8	0.46	0.74	up
LINC01184	chr5:127446326:127447337:-@chr5:127445782|127445785:127445564:-	0.41	0.43	0.51	0.65	0.72	0.65	0.673333	0.45	0.72	0.51	0.65	0.41	down
LOC101928143	chr14:72818820:72818966:-@chr14:72815742:72815885:-@chr14:72811568:72813754:-	0.62	0.69	0.59	0.54	0.48	0.51	0.51	0.633333	0.54	0.69	0.48	0.59	up
LOC101928160	chr8:144845231:144845390|144845357:+@chr8:144845758:144846117:+	0.41	0.41	0.38	0.68	0.44	0.75	0.623333	0.4	0.75	0.41	0.44	0.38	down
LOC105371397	chr16:86353056:86353257:-@chr16:86346399|86347584:86346301:-	0.53	0.54	0.43	0.6	0.76	0.77	0.71	0.5	0.77	0.54	0.6	0.43	down
LOC105372824	chr21:43973039:43973319:+@chr21:43976448:43976751:+@chr21:43978378:43978432:+	0.76	0.78	0.87	0.61	0.48	0.59	0.56	0.803333	0.61	0.87	0.48	0.76	up
LOC374443	chr12:9699736:9699842:+@chr12:9700431:9700560:+@chr12:9700784:9702285:+	0.38	0.45	0.43	0.57	0.47	0.6	0.546667	0.42	0.6	0.45	0.47	0.38	down
LOXL1-AS1	chr15:71999432:71999354|71999232:-@chr15:71996519:71998777:-	0.46	0.45	0.29	0.68	0.49	0.52	0.563333	0.4	0.68	0.46	0.49	0.29	down
LSR	chr19:40441688:40441807:+@chr19:40445239:40445435:+@chr19:40449102:40449275:+	0.2	0.18	0.15	0.26	0.27	0.31	0.28	0.176667	0.31	0.2	0.26	0.15	down
LSR	chr19:40441688:40441807:+@chr19:40445289:40445435:+@chr19:40449102:40449275:+	0.37	0.34	0.31	0.44	0.46	0.46	0.453333	0.34	0.46	0.37	0.44	0.31	down
MAP4K4	chr2:101842537:101842758:+@chr2:101843719:101843880:+@chr2:101846715:101846945:+	0.7	0.69	0.79	0.53	0.49	0.28	0.433333	0.726667	0.53	0.79	0.28	0.69	up
MAP4K4	chr2:101841890:101841976:+@chr2:101842537|101842630:101842758:+	0.42	0.4	0.47	0.26	0.33	0.36	0.316667	0.43	0.36	0.47	0.26	0.4	up
MAP7D1	chr1:36411552:36411666:+@chr1:36413086:36413196:+@chr1:36414387:36414769:+	0.75	0.7	0.75	0.6	0.61	0.67	0.626667	0.733333	0.67	0.75	0.6	0.7	up
MAPK13	chr6:36214120:36214203|36214199:+@chr6:36214457:36215323:+	0.12	0.12	0.07	0.16	0.35	0.13	0.213333	0.103333	0.35	0.12	0.13	0.07	down
MARK3	chr14:103025487:103028124:+@chr14:103034592:103034618:+@chr14:103036246:103036290:+	0.54	0.72	0.71	0.88	0.88	0.86	0.873333	0.656667	0.88	0.72	0.86	0.54	down
MIR1914	chr20:62047958:62048064:-@chr20:62047602:62047796:-	0.29	0.26	0.26	0.33	0.58	0.45	0.453333	0.27	0.58	0.29	0.33	0.26	down
MIR4435-2	chr2:111818109:111818285:-@chr2:111722196:111722289:-@chr2:111713850:111714044:-	0.76	0.82	0.73	0.55	0.61	0.56	0.573333	0.77	0.61	0.82	0.55	0.73	up
MIR4435-2HG	chr2:111818109:111818285:-@chr2:111722196:111722289:-@chr2:111713850:111714044:-	0.76	0.82	0.73	0.55	0.61	0.56	0.573333	0.77	0.61	0.82	0.55	0.73	up
MIR4680	chr10:112643839:112643946:+@chr10:112644160:112644270:+@chr10:112645696:112645835:+	0.92	0.88	0.87	0.75	0.79	0.82	0.786667	0.89	0.82	0.92	0.75	0.87	up
MIR4680	chr10:112637413:112637638|112637634:+@chr10:112639281:112641154:+	0.05	0.04	0.03	0.12	0.09	0.28	0.163333	0.04	0.28	0.05	0.09	0.03	down
MIR4680	chr10:112632745:112632845:+@chr10:112633784:112633930:+@chr10:112635001:112635114:+	0.03	0.03	0.03	0.13	0.21	0.19	0.176667	0.03	0.21	0.03	0.13	0.03	down
MIR6510	chr17:36931463:36931701:-@chr17:36929417:36929650:-@chr17:36928108:36928239:-	0.09	0.08	0.06	0.15	0.28	0.15	0.193333	0.0766667	0.28	0.09	0.15	0.06	down
MIR6510	chr17:36931463:36931701:-@chr17:36928239|36928275:36928108:-	0.76	0.79	0.78	0.58	0.56	0.67	0.603333	0.776667	0.67	0.79	0.56	0.76	up
MOK	chr14:101768625:101769879:-@chr14:101761185:101762498:-@chr14:101760590:101760884:-	0.39	0.32	0.38	0.19	0.2	0.23	0.206667	0.363333	0.23	0.39	0.19	0.32	up
MOK	chr14:101769879:101769778|101769587:-@chr14:101768625:101768798:-	0.18	0.25	0.19	0.35	0.53	0.27	0.383333	0.206667	0.53	0.25	0.27	0.18	down
MOK	chr14:101768625:101769879:-@chr14:101767797:101767911:-@chr14:101764927:101765747:-	0.64	0.66	0.65	0.48	0.55	0.42	0.483333	0.65	0.55	0.66	0.42	0.64	up
MOK	chr14:101769778:101769879:-@chr14:101768625:101768798:-	0.46	0.39	0.47	0.57	0.76	0.52	0.616667	0.44	0.76	0.47	0.52	0.39	down
MORF4L2	chrX:102826755:102828303:-@chrX:102820184|102820235:102820083:-	0.64	0.68	0.61	0.55	0.35	0.57	0.49	0.643333	0.57	0.68	0.35	0.61	up
MPDU1	chr17:7425420:7428007:+@chr17:7429737:7429839:+@chr17:7430734:7431313:+	0.11	0.1	0.21	0.22	0.33	0.22	0.256667	0.14	0.33	0.21	0.22	0.1	down
MPDU1	chr17:7429774:7429843|7429839:+@chr17:7429988:7430480:+	0.21	0.24	0.18	0.06	0.1	0.11	0.09	0.21	0.11	0.24	0.06	0.18	up
MTERF4	chr2:241685331:241685515:-@chr2:241683218:241684526:-@chr2:241682365:241682520:-	0.78	0.76	0.69	0.85	0.85	0.84	0.846667	0.743333	0.85	0.78	0.84	0.69	down
MTERF4	chr2:241685331:241685515:-@chr2:241684481:241684526:-@chr2:241682365:241682520:-	0.63	0.4	0.39	0.72	0.75	0.64	0.703333	0.473333	0.75	0.63	0.64	0.39	down
MTMR3	chr22:29821520:29821595:+@chr22:29821838:29822883:+	0.67	0.45	0.53	0.81	0.85	0.74	0.8	0.55	0.85	0.67	0.74	0.45	down
MTMR3	chr22:29122933:29123159:+@chr22:29125632:29125707:+@chr22:29132331:29132374:+	0.94	0.95	0.9	0.79	0.85	0.84	0.826667	0.93	0.85	0.95	0.79	0.9	up
MYL6	chr12:54838735:54838762:+@chr12:54839674:54839781:+	0.46	0.58	0.49	0.35	0.06	0.28	0.23	0.51	0.35	0.58	0.06	0.46	up
MYO18A	chr17:24445915:24445994:-@chr17:24445794:24445852:-	0.86	0.8	0.76	0.56	0.69	0.73	0.66	0.806667	0.73	0.86	0.56	0.76	up
MYO18A	chr17:24437582:24437944:-@chr17:24436748:24436792:-@chr17:24433460:24433582:-	0.15	0.07	0.07	0.4	0.44	0.41	0.416667	0.0966667	0.44	0.15	0.4	0.07	down
MYOF	chr10:95145889:95145971:-@chr10:95142664:95142702:-@chr10:95138777:95138901:-	0.44	0.51	0.39	0.82	0.8	0.69	0.77	0.446667	0.82	0.51	0.69	0.39	down
NADSYN1	chr11:70843804:70843864:+@chr11:70847122:70847250:+@chr11:70852126:70852179:+	0.58	0.56	0.67	0.52	0.52	0.46	0.5	0.603333	0.52	0.67	0.46	0.56	up
NARS	chr18:53438799:53438881:-@chr18:53434047:53434252:-@chr18:53431832:53431910:-	0.79	0.73	0.75	0.67	0.55	0.71	0.643333	0.756667	0.71	0.79	0.55	0.73	up
NAT9	chr17:70280126:70280129:-@chr17:70279694:70280011:-	0.4	0.5	0.33	0.64	0.7	0.76	0.7	0.41	0.76	0.5	0.64	0.33	down
NAT9	chr17:70281789:70281727|70281600:-@chr17:70280330:70281419:-	0.73	0.77	0.69	0.54	0.5	0.59	0.543333	0.73	0.59	0.77	0.5	0.69	up
NDRG1	chr8:134365674:134365760:-@chr8:134361657:134361692:-@chr8:134345972:134346017:-@chr8:134343472:134343592:-	0.93	0.96	0.94	0.67	0.82	0.89	0.793333	0.943333	0.89	0.96	0.67	0.93	up
NFKB1	chr4:103670023:103670101:+@chr4:103674032:103674072:+@chr4:103678043:103678141:+	0.86	0.87	0.83	0.75	0.72	0.72	0.73	0.853333	0.75	0.87	0.72	0.83	up
NIN	chr14:50296325:50296827:-@chr14:50292960:50295098:-@chr14:50291210:50291335:-	0.16	0.18	0.17	0.9	0.89	0.88	0.89	0.17	0.9	0.18	0.88	0.16	down
NISCH	chr3:52492573:52493693:+@chr3:52494834|52494838:52494883:+	0.68	0.69	0.59	0.46	0.56	0.33	0.45	0.653333	0.56	0.69	0.33	0.59	up
NREP	chr5:111099026:111099103:-@chr5:111098266:111098338:-@chr5:111091015:111094642:-	0.07	0.08	0.04	0.13	0.27	0.19	0.196667	0.0633333	0.27	0.08	0.13	0.04	down
NT5C2	chr10:104930932:104931079:-@chr10:104924605:104924729:-@chr10:104856336:104856453:-	0.88	0.87	0.85	0.78	0.7	0.8	0.76	0.866667	0.8	0.88	0.7	0.85	up
NUMA1	chr11:71401589:71404954:-@chr11:71401095:71401136:-@chr11:71399480:71399548:-	0.56	0.63	0.65	0.42	0.5	0.5	0.473333	0.613333	0.5	0.65	0.42	0.56	up
NUMB	chr14:72818820:72818966:-@chr14:72815742:72815885:-@chr14:72811568:72813754:-	0.62	0.69	0.59	0.54	0.48	0.51	0.51	0.633333	0.54	0.69	0.48	0.59	up
NUP88	chr17:5263398:5264224:-@chr17:5262160|5262185:5262059:-	0.42	0.55	0.45	0.35	0.41	0.32	0.36	0.473333	0.41	0.55	0.32	0.42	up
ORMDL1	chr2:190357240:190357342:-@chr2:190355985:190356094:-@chr2:190355393:190355573:-	0.39	0.45	0.28	0.48	0.56	0.55	0.53	0.373333	0.56	0.45	0.48	0.28	down
PAM16	chr16:4333209:4334334:-@chr16:4331585|4331674:4331370:-	0.85	0.84	0.72	0.93	0.89	0.95	0.923333	0.803333	0.95	0.85	0.89	0.72	down
PBRM1	chr3:52636329:52636426:-@chr3:52633953:52633997:-@chr3:52626318:52626594:-	0.4	0.3	0.17	0.13	0.09	0.14	0.12	0.29	0.14	0.4	0.09	0.17	up
PDCD4	chr10:112637413:112637638|112637634:+@chr10:112639281:112641154:+	0.05	0.04	0.03	0.12	0.09	0.28	0.163333	0.04	0.28	0.05	0.09	0.03	down
PDCD4	chr10:112643839:112643946:+@chr10:112644160:112644270:+@chr10:112645696:112645835:+	0.92	0.88	0.87	0.75	0.79	0.82	0.786667	0.89	0.82	0.92	0.75	0.87	up
PDCD4	chr10:112632745:112632845:+@chr10:112633784:112633930:+@chr10:112635001:112635114:+	0.03	0.03	0.03	0.13	0.21	0.19	0.176667	0.03	0.21	0.03	0.13	0.03	down
PDXK	chr21:43973039:43973319:+@chr21:43976448:43976751:+@chr21:43978378:43978432:+	0.76	0.78	0.87	0.61	0.48	0.59	0.56	0.803333	0.61	0.87	0.48	0.76	up
PITRM1	chr10:3181813:3181945:-@chr10:3179764:3179929:-	0.56	0.42	0.33	0.12	0.25	0.17	0.18	0.436667	0.25	0.56	0.12	0.33	up
PITRM1	chr10:3198421:3198572:-@chr10:3197605:3197715:-@chr10:3197426:3197526:-	0.75	0.73	0.75	0.85	0.87	0.88	0.866667	0.743333	0.88	0.75	0.85	0.73	down
PLXNB3	chrX:152684120:152684229:+@chrX:152685522:152686562:+@chrX:152686898:152687077:+	0.76	0.71	0.81	0.4	0.66	0.45	0.503333	0.76	0.66	0.81	0.4	0.71	up
POLR1D	chr13:27092881:27093277:+@chr13:27093474:27093574:+@chr13:27120516:27120590:+	0.8	0.81	0.65	0.42	0.58	0.31	0.436667	0.753333	0.58	0.81	0.31	0.65	up
POLR2J4	chr7:43968097:43968214:-@chr7:43967719:43967869:-@chr7:43958035:43959320:-	0.18	0.24	0.2	0.08	0.13	0.08	0.0966667	0.206667	0.13	0.24	0.08	0.18	up
POLR2J4	chr7:44020730:44020907:-@chr7:44019717:44019803:-@chr7:43979334:43979447:-	0.8	0.76	0.83	0.5	0.58	0.7	0.593333	0.796667	0.7	0.83	0.5	0.76	up
POLR2J4	chr7:44022558:44022933:-@chr7:44019803|44020907:44019686:-	0.8	0.73	0.81	0.94	0.93	0.89	0.92	0.78	0.94	0.81	0.89	0.73	down
PPP1R12A	chr12:78725137:78725266:-@chr12:78724077:78724244:-@chr12:78723503:78723679:-	0.63	0.59	0.75	0.57	0.55	0.4	0.506667	0.656667	0.57	0.75	0.4	0.59	up
PREPL	chr2:44442167:44442504:-@chr2:44440140:44440681:-@chr2:44426911:44427033:-	0.71	0.84	0.57	0.52	0.35	0.51	0.46	0.706667	0.52	0.84	0.35	0.57	up
PREPL	chr2:44442023:44442212:-@chr2:44440239|44440681:44440140:-	0.42	0.57	0.53	0.69	0.73	0.7	0.706667	0.506667	0.73	0.57	0.69	0.42	down
PRKAG2	chr7:150960088:150960372:-@chr7:150923470|150923473:150923364:-	0.71	0.76	0.75	0.68	0.66	0.55	0.63	0.74	0.68	0.76	0.55	0.71	up
PXN	chr12:119137746:119137847:-@chr12:119137459|119137603:119137289:-	0.61	0.58	0.6	0.5	0.49	0.5	0.496667	0.596667	0.5	0.61	0.49	0.58	up
PXN	chr12:119143809:119143944:-@chr12:119137746:119137847:-@chr12:119137289:119137603:-	0.33	0.28	0.25	0.4	0.44	0.46	0.433333	0.286667	0.46	0.33	0.4	0.25	down
R3HDM4	chr19:864087:864245:-@chr19:853519:853627:-@chr19:852976:853434:-	0.66	0.77	0.71	0.55	0.58	0.62	0.583333	0.713333	0.62	0.77	0.55	0.66	up
RAB6A	chr11:73109539:73109592:-@chr11:73107478:73107583:-@chr11:73107306:73107411:-@chr11:73104944:73105055:-	0.34	0.34	0.29	0.39	0.44	0.45	0.426667	0.323333	0.45	0.34	0.39	0.29	down
RAB9A	chrX:13617137:13617328:+@chrX:13631775:13631942:+@chrX:13636761:13638982:+	0.51	0.5	0.48	0.69	0.63	0.56	0.626667	0.496667	0.69	0.51	0.56	0.48	down
RABGGTB	chr1:76024306:76024547:+@chr1:76024973:76025138:+@chr1:76025770:76028790:+	0.63	0.63	0.83	0.58	0.46	0.5	0.513333	0.696667	0.58	0.83	0.46	0.63	up
RABGGTB	chr1:76024306:76024547:+@chr1:76024973:76025070:+@chr1:76025770:76028790:+	0.39	0.64	0.76	0.24	0.24	0.16	0.213333	0.596667	0.24	0.76	0.16	0.39	up
RABL6	chr9:138822013:138822599:+@chr9:138823528:138823702:+@chr9:138823961:138824315:+	0.19	0.35	0.18	0.16	0.1	0.13	0.13	0.24	0.16	0.35	0.1	0.18	up
REPS1	chr6:139292807:139292928:-@chr6:139289227:139289311:-@chr6:139283867:139283954:-	0.48	0.23	0.45	0.17	0.09	0.15	0.136667	0.386667	0.17	0.48	0.09	0.23	up
REPS1	chr6:139292807:139292928:-@chr6:139289231:139289311:-@chr6:139283867:139283954:-	0.73	0.63	0.77	0.48	0.37	0.36	0.403333	0.71	0.48	0.77	0.36	0.63	up
REPS1	chr6:139292807:139292928:-@chr6:139289231:139289308:-@chr6:139283867:139283954:-	0.37	0.36	0.54	0.21	0.13	0.16	0.166667	0.423333	0.21	0.54	0.13	0.36	up
RNF31	chr14:23699569:23700387:+@chr14:23701193:23701329:+@chr14:23702015:23702198:+	0.97	0.98	0.97	0.86	0.88	0.77	0.836667	0.973333	0.88	0.98	0.77	0.97	up
RPAIN	chr17:5266813:5266873:+@chr17:5270015|5272115:5272255:+	0.33	0.33	0.41	0.58	0.62	0.61	0.603333	0.356667	0.62	0.41	0.58	0.33	down
RPL13A	chr19:54686109:54686168:+@chr19:54686605:54686616:+	0.56	0.57	0.59	0.44	0.52	0.27	0.41	0.573333	0.52	0.59	0.27	0.56	up
RRP7A	chr22:41243955:41244097:-@chr22:41242044|41242246:41241961:-	0.73	0.67	0.79	0.26	0.55	0.59	0.466667	0.73	0.59	0.79	0.26	0.67	up
RWDD3	chr1:95482355:95482842|95482795:+@chr1:95484686:95484801:+	0.55	0.5	0.44	0.61	0.63	0.58	0.606667	0.496667	0.63	0.55	0.58	0.44	down
SAFB	chr19:5599027:5599054:+@chr19:5600000:5600510:+@chr19:5600937:5600986:+	0.54	0.5	0.61	0.35	0.41	0.47	0.41	0.55	0.47	0.61	0.35	0.5	up
SAT1	chrX:23711838:23711921:+@chrX:23712332:23712441:+	0.38	0.32	0.34	0.55	0.62	0.57	0.58	0.346667	0.62	0.38	0.55	0.32	down
SEC14L2	chr22:29122933:29123159:+@chr22:29125632:29125707:+@chr22:29132331:29132374:+	0.94	0.95	0.9	0.79	0.85	0.84	0.826667	0.93	0.85	0.95	0.79	0.9	up
SERPINB1	chr6:2781483:2781341|2781336:-@chr6:2781089:2781252:-	0.21	0.43	0.35	0.46	0.6	0.47	0.51	0.33	0.6	0.43	0.46	0.21	down
SIGIRR	chr11:397957:397852|397817:-@chr11:397233:397568:-	0.91	0.92	0.96	0.84	0.82	0.77	0.81	0.93	0.84	0.96	0.77	0.91	up
SIGIRR	chr11:404823:405003:-@chr11:398695:398893:-@chr11:398073:398206:-	0.9	0.88	0.89	0.71	0.7	0.59	0.666667	0.89	0.71	0.9	0.59	0.88	up
SIGIRR	chr11:399868:400027:-@chr11:398073:398206:-@chr11:397817:397957:-	0.88	0.79	0.87	0.7	0.75	0.59	0.68	0.846667	0.75	0.88	0.59	0.79	up
SKIL	chr3:171581726:171581823:+@chr3:171585015:171585109:+@chr3:171590705:171590946:+	0.48	0.58	0.55	0.63	0.72	0.74	0.696667	0.536667	0.74	0.58	0.63	0.48	down
SLC12A4	chr16:66535352:66536624:-@chr16:66534593|66534616:66534460:-	0.74	0.63	0.7	0.56	0.36	0.62	0.513333	0.69	0.62	0.74	0.36	0.63	up
SLK	chr10:105757925:105758104:+@chr10:105760564:105760656:+@chr10:105767908:105768037:+	0.62	0.65	0.68	0.47	0.49	0.5	0.486667	0.65	0.5	0.68	0.47	0.62	up
SLMAP	chr3:57883656:57883790:+@chr3:57886612:57886701:+@chr3:57888063:57891305:+	0.1	0.22	0.25	0.76	0.76	0.76	0.76	0.19	0.76	0.25	0.76	0.1	down
SUPT20H	chr13:36496172:36496330:-@chr13:36494217|36494454:36494148:-	0.37	0.41	0.53	0.19	0.28	0.28	0.25	0.436667	0.28	0.53	0.19	0.37	up
TBC1D25	chrX:48282951:48283252:+@chrX:48284617:48284774:+@chrX:48302229:48302678:+	0.46	0.63	0.61	0.78	0.82	0.74	0.78	0.566667	0.82	0.63	0.74	0.46	down
TBC1D25	chrX:48284617:48284774:+@chrX:48288201:48288355:+@chrX:48302229:48302678:+	0.79	0.74	0.87	0.73	0.69	0.62	0.68	0.8	0.73	0.87	0.62	0.74	up
TBRG1	chr11:123997953:124001009:+@chr11:124001579:124001715:+@chr11:124002010:124002156:+	0.47	0.2	0.48	0.57	0.57	0.56	0.566667	0.383333	0.57	0.48	0.56	0.2	down
TCF7L2	chr10:114907522:114907818:+@chr10:114908416:114908466:+@chr10:114910368:114910440:+@chr10:114915304:114917427:+	0.62	0.59	0.54	0.66	0.77	0.63	0.686667	0.583333	0.77	0.62	0.63	0.54	down
TIAF1	chr17:24437582:24437944:-@chr17:24436748:24436792:-@chr17:24433460:24433582:-	0.15	0.07	0.07	0.4	0.44	0.41	0.416667	0.0966667	0.44	0.15	0.4	0.07	down
TNC	chr9:116875703:116875966:-@chr9:116848510:116848782:-@chr9:116844319:116844441:-	0.81	0.88	0.86	0.97	0.98	0.95	0.966667	0.85	0.98	0.88	0.95	0.81	down
TRA2A	chr7:23537933:23538182:-@chr7:23528498:23528576:-@chr7:23527851:23527984:-	0.19	0.22	0.18	0.08	0.06	0.07	0.07	0.196667	0.08	0.22	0.06	0.18	up
TRA2A	chr7:23537933:23538182:-@chr7:23528276:23528576:-@chr7:23527851:23527984:-	0.21	0.23	0.19	0.12	0.07	0.12	0.103333	0.21	0.12	0.23	0.07	0.19	up
TRA2A	chr7:23537933:23538182:-@chr7:23528265:23528576:-@chr7:23527851:23527984:-	0.23	0.27	0.22	0.14	0.08	0.12	0.113333	0.24	0.14	0.27	0.08	0.22	up
TRAPPC2L	chr16:87452528:87452698:+@chr16:87453254:87453352:+@chr16:87453482:87453659:+	0.68	0.55	0.67	0.23	0.22	0.2	0.216667	0.633333	0.23	0.68	0.2	0.55	up
TRAPPC6B	chr14:38708970:38709794:-@chr14:38706907:38707004:-@chr14:38702201:38702316:-@chr14:38697240:38698505:-	0.6	0.75	0.43	0.31	0.42	0.36	0.363333	0.593333	0.42	0.75	0.31	0.43	up
TRMT1	chr19:13088245:13088001|13087986:-@chr19:13087453:13087866:-	0.78	0.79	0.85	0.41	0.5	0.57	0.493333	0.806667	0.57	0.85	0.41	0.78	up
TRMT2B	chrX:100193462:100193760:-@chrX:100183687:100183957:-@chrX:100182962:100183016:-	0.6	0.64	0.67	0.81	0.74	0.68	0.743333	0.636667	0.81	0.67	0.68	0.6	down
TRRAP	chr7:98351282:98351447|98351390:+@chr7:98352982:98353238:+	0.92	0.89	0.92	0.73	0.82	0.85	0.8	0.91	0.85	0.92	0.73	0.89	up
TSNARE1	chr8:143482370:143482507:-@chr8:143433905:143434031:-@chr8:143423234:143423740:-@chr8:143411022:143411099:-	0.69	0.47	0.62	0.74	0.76	0.7	0.733333	0.593333	0.76	0.69	0.7	0.47	down
TSPAN31	chr12:56426226:56426306:+@chr12:56426639:56426770:+	0.01	0.04	0.01	0.06	0.09	0.32	0.156667	0.02	0.32	0.04	0.06	0.01	down
TYMP	chr22:49315199:49315291:-@chr22:49314791:49314910:-	0.93	0.95	0.95	0.84	0.85	0.79	0.826667	0.943333	0.85	0.95	0.79	0.93	up
TYMP	chr22:49315199:49315855:-@chr22:49314791:49314910:-@chr22:49312728:49313012:-	0.22	0.11	0.08	0.37	0.27	0.5	0.38	0.136667	0.5	0.22	0.27	0.08	down
UBAC2	chr13:98688682:98688809:+@chr13:98694770:98694879:+@chr13:98764352:98764475:+	0.82	0.84	0.9	0.7	0.73	0.65	0.693333	0.853333	0.73	0.9	0.65	0.82	up
UCKL1	chr20:62047958:62048064:-@chr20:62047602:62047796:-	0.29	0.26	0.26	0.33	0.58	0.45	0.453333	0.27	0.58	0.29	0.33	0.26	down
UPF3B	chrX:118859067:118859249:-@chrX:118858637:118858675:-@chrX:118856358:118856518:-	0.36	0.4	0.43	0.45	0.52	0.64	0.536667	0.396667	0.64	0.43	0.45	0.36	down
USP19	chr3:49130384:49130557:-@chr3:49130222|49130267:49130094:-	0.72	0.59	0.65	0.56	0.52	0.54	0.54	0.653333	0.56	0.72	0.52	0.59	up
VPS28	chr8:145624680:145624755:-@chr8:145623462|145623482:145623100:-	0.5	0.59	0.67	0.86	0.7	0.85	0.803333	0.586667	0.86	0.67	0.7	0.5	down
VPS28	chr8:145621137:145621963:-@chr8:145620909:145621010:-	0.26	0.19	0.25	0.47	0.36	0.3	0.376667	0.233333	0.47	0.26	0.3	0.19	down
VPS29	chr12:109421723:109424313:-@chr12:109421008:109421044:-@chr12:109418200:109419190:-	0.52	0.45	0.49	0.4	0.36	0.38	0.38	0.486667	0.4	0.52	0.36	0.45	up
YIPF3	chr6:43591417:43591322|43591311:-@chr6:43588477:43589349:-	0.92	0.9	0.89	0.81	0.87	0.71	0.796667	0.903333	0.87	0.92	0.71	0.89	up
ZBTB38	chr3:142605459:142605563:+@chr3:142639775:142639897:+@chr3:142643921:142651324:+	0.36	0.35	0.29	0.25	0.17	0.21	0.21	0.333333	0.25	0.36	0.17	0.29	up
ZNF462	chr9:108732627:108732791:+@chr9:108734365|108734548:108734651:+	0.36	0.36	0.44	0.54	0.48	0.49	0.503333	0.386667	0.54	0.44	0.48	0.36	down
ZNF618	chr9:115818796:115818885:+@chr9:115830834|115830932:115831073:+	0.76	0.84	0.81	0.35	0.59	0.73	0.556667	0.803333	0.73	0.84	0.35	0.76	up
ZNF707	chr8:144845231:144845390|144845357:+@chr8:144845758:144846117:+	0.41	0.41	0.38	0.68	0.44	0.75	0.623333	0.4	0.75	0.41	0.44	0.38	down
ZNF721	chr4:456364:456490:-@chr4:421235:421300:-@chr4:406991:410908:-	0.45	0.42	0.38	0.7	0.68	0.65	0.676667	0.416667	0.7	0.45	0.65	0.38	down
ZNF721	chr4:421235:421300:-@chr4:419559:419668:-@chr4:406991:410908:-	0.78	0.71	0.67	0.6	0.63	0.6	0.61	0.72	0.63	0.78	0.6	0.67	up
ZNF721	chr4:456364:456490:-@chr4:451406:451470:-@chr4:423192:428221:-	0.16	0.15	0.11	0.26	0.25	0.45	0.32	0.14	0.45	0.16	0.25	0.11	down
