# Supplementary material for: Alternative splicing downstream of EMT enhances phenotypic plasticity and malignant behavior in colon cancer
Source: eLife. 2022 Nov 8;11:e82006. doi: 10.7554/eLife.82006 (PMC9674345; doi:10.7554/eLife.82006)
Supplement: Supplementary file 3. [file elife-82006-supp3.xlsx]

## Sheet: Sheet1
Supplementary File 3. List of primer sequences used for RT-PCR analysis
Gene	Primer sequence 5'-3'
ESRP1	Fw: TTGCAGCAAGATGGAACTTATTG
	Rv: TTGATCTGAAGACTGCCATGGT
GAPDH	Fw: ACCCAGAAGACTGTGGATGG
	Rv: TCTAGACGGCAGGTCAGGTC
CD44s	Fw: AAGACATCTACCCCAGCAAC
	Rv: TCTCTGGTAGCAGGGATTC
CD44v6	Fw: GTGGTTTGGCAACAGATGGC
	Rv: TGTCCCTGTTGTCGAATGGG
NUMB1/3	Fw: CTTCCAAGCTAATGGCACTG
	Rv: CTCTTAGACACCTCTTCTAACCA
NUMB2/4	Fw: CAATCTCCTACCTTCCAAGGG
	Rv: CGGACGCTCTTAGACACCTC
NUMB-PRR	Fw: TGCTCCGATGACCAAACCAG
	Rv: CACCTCTTCTAACCATCGGTC
ZEB1	Fw: GCACAACCAAGTGCAGAAGA
	Rv: CATTTGCAGATTGAGGCTGA
Snail1	Fw: GCGAGCTGCAGGACTCTAAT
	Rv: CCACTGTCCTCATCTGACA
Vimentin	Fw: GAGAACTTTGCCGTTGAAGC
	Rv: GCTTCCTGTAGGTGGCAATC
Ecadherin	Fw: TGCCCAGAAAATGAAAAAGG
	Rv: GTGTATGTGGCAATGCGTTC
EpCAM	Fw: GCAGCTCAGGAAGAATGTG
	Rv: CAGCCAGCTTTGAGCAAATGAC
NUMB	Fw: ATGCCAAGAAAGCTGAAACAG
	Rv: AGTCTTCCTCTGCATAGTGG
CD44	Fw: TACAGCATCTCTCGGACGGA
	Rv：CACCCCTGTGTTGTTTGCTG
HES1	Fw: AAGAAAGATAGCTCGCGGCA
	Rv: CGGAGGTGCTTCACTGTCAT
HEY1	Fw: AGAGTGCGGACGAGAATGGAAACT
	Rv: CGTCGGCGCTTCTCAATTATTCCT
ID2	Fw: ATCCTGTCCTTGCAGGCTTC
	Rv: ACCGCTTATTCAGCCACACA
