# Supplementary material for: Alternative splicing downstream of EMT enhances phenotypic plasticity and malignant behavior in colon cancer
Source: eLife. 2022 Nov 8;11:e82006. doi: 10.7554/eLife.82006 (PMC9674345; doi:10.7554/eLife.82006)
Supplement: Supplementary file 4. [file elife-82006-supp4.xlsx]

## Sheet: HCT116_CD44s_vs_CD44v6
Supplementary File 4. List of Differential Expressed Gene in HCT116 CD44s OE vs CD44v6 OE
ensembl_gene_id	hgnc_symbol	log2FoldChange	lfcSE	stat	pvalue	padj
ENSG00000169562	GJB1	6.43091	1.78275	3.60731	0.000309394	0.0209453
ENSG00000169908	TM4SF1	6.07689	1.75594	3.46075	0.000538671	0.0300821
ENSG00000228536	LYPLAL1-AS1	5.26396	1.20986	4.35087	1.35599e-05	0.00178495
ENSG00000113140	SPARC	4.44084	0.941718	4.71568	2.409e-06	0.00038792
ENSG00000154856	APCDD1	4.42616	1.34527	3.29016	0.00100132	0.0487033
ENSG00000104371	DKK4	4.27099	0.839787	5.0858	3.66082e-07	7.78441e-05
ENSG00000168542	COL3A1	3.90285	0.402162	9.70466	2.88028e-22	1.59241e-18
ENSG00000182050	MGAT4C	3.79342	0.699027	5.42672	5.73989e-08	1.67645e-05
ENSG00000169508	GPR183	3.70434	0.755276	4.90462	9.3608e-07	0.00017643
ENSG00000103355	PRSS33	3.62969	0.589527	6.15694	7.41624e-10	3.72745e-07
ENSG00000164418	GRIK2	3.54979	0.553892	6.40881	1.46656e-10	9.72975e-08
ENSG00000196660	SLC30A10	3.54576	1.01958	3.47765	0.000505828	0.0288674
ENSG00000163762	TM4SF18	3.27753	0.650332	5.03978	4.66057e-07	9.54324e-05
ENSG00000148677	ANKRD1	3.19869	0.930306	3.43832	0.000585342	0.0321168
ENSG00000184995	IFNE	2.99155	0.868168	3.44582	0.000569332	0.0314765
ENSG00000237976	RFX5-AS1	2.83784	0.874655	3.24453	0.00117645	0.0542019
ENSG00000229124	VIM-AS1	2.69946	0.561036	4.81157	1.49753e-06	0.000253449
ENSG00000026025	VIM	2.64867	0.289637	9.14479	5.97437e-20	2.47727e-16
ENSG00000227954	TARID	2.53036	0.647574	3.90745	9.32763e-05	0.00840805
ENSG00000186081	KRT5	2.52196	0.598973	4.21048	2.54834e-05	0.00306281
ENSG00000127863	TNFRSF19	2.21325	0.407893	5.42605	5.76133e-08	1.67645e-05
ENSG00000168874	ATOH8	2.18951	0.34316	6.38043	1.76587e-10	1.08477e-07
ENSG00000133083	DCLK1	2.07006	0.572018	3.61887	0.000295888	0.0202793
ENSG00000120337	TNFSF18	2.05585	0.503209	4.08548	4.39863e-05	0.00461745
ENSG00000075213	SEMA3A	1.99727	0.294315	6.78616	1.15157e-11	1.12353e-08
ENSG00000147041	SYTL5	1.97671	0.568415	3.47758	0.000505964	0.0288674
ENSG00000117586	TNFSF4	1.9759	0.584223	3.38209	0.000719357	0.038119
ENSG00000253552	HOXA-AS2	1.86745	0.524808	3.55835	0.000373189	0.0238985
ENSG00000067048	DDX3Y	1.86677	0.477477	3.90965	9.24307e-05	0.00837735
ENSG00000148516	ZEB1	1.85928	0.341687	5.44148	5.28412e-08	1.5935e-05
ENSG00000279692		1.85683	0.290484	6.39219	1.63522e-10	1.04314e-07
ENSG00000143248	RGS5	1.81258	0.26166	6.92724	4.2912e-12	5.08384e-09
ENSG00000162490	DRAXIN	1.77067	0.292676	6.04993	1.44906e-09	6.67616e-07
ENSG00000088882	CPXM1	1.75636	0.505091	3.47731	0.000506476	0.0288674
ENSG00000102678	FGF9	1.74765	0.397893	4.39226	1.12176e-05	0.00153765
ENSG00000132386	SERPINF1	1.66517	0.409583	4.06553	4.79239e-05	0.00484674
ENSG00000143341	HMCN1	1.59336	0.459063	3.47089	0.000518728	0.0293277
ENSG00000197467	COL13A1	1.56959	0.312967	5.0152	5.29796e-07	0.000104609
ENSG00000260257		1.54956	0.494274	3.13503	0.00171838	0.0685121
ENSG00000204335	SP5	1.54019	0.263755	5.83947	5.23667e-09	2.17138e-06
ENSG00000137726	FXYD6	1.53499	0.370462	4.14344	3.42128e-05	0.00380842
ENSG00000156427	FGF18	1.52844	0.4563	3.34963	0.00080919	0.0415518
ENSG00000271270	TMCC1-DT	1.52172	0.499347	3.04741	0.00230823	0.0856472
ENSG00000245522	LINC02709	-1.50128	0.467038	-3.21448	0.0013068	0.0584222
ENSG00000183742	MACC1	-1.51826	0.295288	-5.14163	2.72363e-07	6.18825e-05
ENSG00000162069	BICDL2	-1.52705	0.231507	-6.59611	4.22078e-11	3.18209e-08
ENSG00000152766	ANKRD22	-1.59268	0.465576	-3.42088	0.000624189	0.0338327
ENSG00000147676	MAL2	-1.65367	0.186428	-8.87027	7.29666e-19	1.34469e-15
ENSG00000167754	KLK5	-1.68775	0.486917	-3.4662	0.000527868	0.0295784
ENSG00000214049	UCA1	-1.72496	0.166483	-10.3612	3.72407e-25	3.08837e-21
ENSG00000059728	MXD1	-1.74352	0.321997	-5.41471	6.13878e-08	1.75548e-05
ENSG00000137628	DDX60	-1.76149	0.242955	-7.25027	4.1593e-13	6.27146e-10
ENSG00000115339	GALNT3	-1.79074	0.331809	-5.39691	6.77998e-08	1.90598e-05
ENSG00000182795	C1orf116	-1.81997	0.247083	-7.36584	1.76031e-13	2.91965e-10
ENSG00000181143	MUC16	-1.82837	0.479777	-3.81088	0.000138471	0.0113137
ENSG00000197191	CYSRT1	-1.83075	0.271665	-6.73902	1.5946e-11	1.46933e-08
ENSG00000189334	S100A14	-1.83629	0.265844	-6.9074	4.93603e-12	5.45794e-09
ENSG00000183914	DNAH2	-1.85299	0.40026	-4.62946	3.66624e-06	0.000552802
ENSG00000112297	CRYBG1	-1.88747	0.285828	-6.60352	4.01517e-11	3.17122e-08
ENSG00000129354	AP1M2	-1.9279	0.216412	-8.9085	5.17288e-19	1.22568e-15
ENSG00000253313	C1orf210	-1.94343	0.363537	-5.34589	8.99719e-08	2.48712e-05
ENSG00000169245	CXCL10	-1.97776	0.562769	-3.51434	0.000440842	0.0271113
ENSG00000138271	GPR87	-2.03378	0.546972	-3.71826	0.000200602	0.0151926
ENSG00000154764	WNT7A	-2.10752	0.656401	-3.21072	0.00132402	0.0588747
ENSG00000137648	TMPRSS4	-2.15931	0.566904	-3.80895	0.000139556	0.0113465
ENSG00000023445	BIRC3	-2.16677	0.306846	-7.06143	1.64798e-12	2.10256e-09
ENSG00000153292	ADGRF1	-2.2186	0.243324	-9.11789	7.66e-20	2.54097e-16
ENSG00000049283	EPN3	-2.29299	0.219998	-10.4228	1.95203e-25	3.08837e-21
ENSG00000157168	NRG1	-2.33705	0.577179	-4.04909	5.14165e-05	0.00513233
ENSG00000083307	GRHL2	-2.43508	0.604065	-4.03115	5.55035e-05	0.00544722
ENSG00000233198	RNF224	-2.46673	0.70459	-3.50094	0.000463613	0.0276286
ENSG00000185847	LINC01405	-2.51907	0.409714	-6.14835	7.8291e-10	3.81922e-07
ENSG00000162738	VANGL2	-2.54922	0.490413	-5.1981	2.01338e-07	4.91088e-05
ENSG00000177409	SAMD9L	-2.57505	0.625302	-4.11809	3.82024e-05	0.00416859
ENSG00000258130		-2.64799	0.796584	-3.32418	0.000886786	0.0441689
ENSG00000262152	LINC00514	-2.66613	0.718813	-3.70907	0.00020802	0.0155457
ENSG00000155066	PROM2	-2.73671	0.307866	-8.88929	6.15031e-19	1.27511e-15
ENSG00000184292	TACSTD2	-2.94044	0.324826	-9.05236	1.39908e-19	3.86753e-16
ENSG00000181126	HLA-V	-3.00285	0.845611	-3.5511	0.000383631	0.0241936
ENSG00000130701	RBBP8NL	-3.22783	0.531773	-6.06995	1.27951e-09	6.06339e-07
ENSG00000204618	RNF39	-3.29534	1.10635	-2.97858	0.00289589	0.0999274
ENSG00000111245	MYL2	-3.42492	1.02485	-3.34189	0.000832098	0.0423804
ENSG00000133424	LARGE1	-3.51247	0.54286	-6.47031	9.78029e-11	7.05287e-08
ENSG00000274173		-3.61298	0.748064	-4.82977	1.36687e-06	0.000239643
ENSG00000255443	CD44-AS1	-9.14758	1.56535	-5.84379	5.10258e-09	2.17003e-06

## Sheet: HCT116_CD44s_vs_Parental
Supplementary File 4. List of Differential Expressed Gene in HCT116 CD44s OE vs HCT116 parental
ensembl_gene_id	hgnc_symbol	baseMean	log2FoldChange	lfcSE	stat	pvalue	padj
ENSG00000134321	RSAD2	180.628	9.93671	2.46287	4.03461	5.4693e-05	0.00131851
ENSG00000182050	MGAT4C	38.4564	9.18676	1.56196	5.88157	4.06387e-09	3.9188e-07
ENSG00000104371	DKK4	29.611	8.83732	1.59858	5.52822	3.23504e-08	2.49564e-06
ENSG00000133321	PLAAT4	117.972	8.75526	1.4834	5.90217	3.58758e-09	3.52092e-07
ENSG00000171855	IFNB1	31.3135	7.86131	1.63569	4.80613	1.53884e-06	7.34374e-05
ENSG00000132530	XAF1	96.91	7.81762	2.19263	3.56541	0.000363283	0.00592469
ENSG00000162654	GBP4	34.3426	7.69788	1.62382	4.74059	2.13099e-06	9.52685e-05
ENSG00000197110	IFNL3	981.984	7.55983	1.32046	5.72514	1.03347e-08	9.21563e-07
ENSG00000205693	MANSC4	13.1737	7.51306	1.75986	4.26912	1.96246e-05	0.000586475
ENSG00000137959	IFI44L	61.2919	7.38227	2.064	3.57669	0.000347976	0.00572573
ENSG00000271503	CCL5	1699.1	7.10339	2.14883	3.3057	0.000947399	0.0122285
ENSG00000165949	IFI27	2086.98	6.98306	1.55683	4.48545	7.27616e-06	0.000260091
ENSG00000152583	SPARCL1	11.5782	6.96335	1.74393	3.9929	6.52709e-05	0.00152262
ENSG00000168542	COL3A1	255.11	6.88444	0.56029	12.2873	1.06032e-34	3.51731e-31
ENSG00000089127	OAS1	1495.22	6.52004	1.67382	3.8953	9.80769e-05	0.00212641
ENSG00000137965	IFI44	689.236	6.5103	1.17324	5.54898	2.87346e-08	2.26948e-06
ENSG00000183709	IFNL2	714.288	6.46598	2.13228	3.03243	0.00242591	0.0248593
ENSG00000116701	NCF2	70.4691	6.35649	1.14926	5.53094	3.18515e-08	2.49564e-06
ENSG00000110446	SLC15A3	52.0388	6.13846	1.19488	5.13729	2.78732e-07	1.66297e-05
ENSG00000243649	CFB	102.699	6.09263	1.87796	3.24428	0.00117748	0.014445
ENSG00000128284	APOL3	90.4959	6.05738	1.4449	4.19226	2.76189e-05	0.000771189
ENSG00000182393	IFNL1	1283.16	5.92446	1.51933	3.89938	9.64408e-05	0.00209917
ENSG00000011590	ZBTB32	70.6909	5.80261	1.15684	5.01592	5.27812e-07	2.9181e-05
ENSG00000130303	BST2	1071.99	5.36355	1.17885	4.54982	5.36907e-06	0.000205661
ENSG00000154451	GBP5	10.2775	5.3577	1.81634	2.94973	0.00318054	0.03067
ENSG00000185885	IFITM1	1556.88	5.30294	1.54757	3.42662	0.00061115	0.0088606
ENSG00000228536	LYPLAL1-AS1	19.6146	5.22569	1.21162	4.31299	1.61061e-05	0.000500255
ENSG00000169245	CXCL10	61.4932	5.21229	1.16321	4.48094	7.43154e-06	0.000264789
ENSG00000128422	KRT17	387.447	5.19336	0.446641	11.6276	2.98403e-31	7.07046e-28
ENSG00000135114	OASL	8554.72	5.18212	1.04187	4.97385	6.56352e-07	3.52306e-05
ENSG00000229124	VIM-AS1	55.9283	5.138	0.726449	7.07276	1.51877e-12	3.14879e-10
ENSG00000185559	DLK1	14.8214	5.00716	1.44745	3.45929	0.000541597	0.00806046
ENSG00000126709	IFI6	8804.54	4.98931	1.22697	4.06638	4.77485e-05	0.00118912
ENSG00000164879	CA3	14.973	4.9719	1.34724	3.69042	0.00022388	0.0040516
ENSG00000111335	OAS2	201.372	4.91795	1.43092	3.43692	0.000588373	0.00856783
ENSG00000100342	APOL1	103.796	4.85668	0.667464	7.27631	3.43073e-13	8.49284e-11
ENSG00000117228	GBP1	25.8439	4.8396	1.68856	2.8661	0.00415559	0.0364874
ENSG00000119922	IFIT2	2554.06	4.51453	0.874725	5.16108	2.4553e-07	1.49171e-05
ENSG00000164418	GRIK2	55.6793	4.5011	0.621857	7.23816	4.54799e-13	1.08125e-10
ENSG00000015413	DPEP1	1156.75	4.4862	0.73321	6.11857	9.44194e-10	1.08753e-07
ENSG00000169908	TM4SF1	11.6115	4.4423	1.30618	3.40097	0.00067146	0.00953496
ENSG00000256747		17.9545	4.41419	1.12709	3.91645	8.98625e-05	0.00197412
ENSG00000178685	PARP10	1039.15	4.38169	1.04559	4.19063	2.78176e-05	0.000771543
ENSG00000169248	CXCL11	25.1204	4.33763	1.29074	3.36057	0.000777816	0.0106619
ENSG00000108771	DHX58	880.171	4.32976	1.0692	4.04952	5.13227e-05	0.00125387
ENSG00000285210	LINC02795	10.7886	4.31264	1.51636	2.84407	0.00445412	0.0381986
ENSG00000196660	SLC30A10	15.0012	4.30858	1.12429	3.83226	0.00012697	0.0026142
ENSG00000185745	IFIT1	6891.6	4.28738	0.883308	4.85378	1.2113e-06	5.96162e-05
ENSG00000215817	ZC3H11B	21.826	4.23055	0.990404	4.27154	1.94125e-05	0.000582234
ENSG00000177409	SAMD9L	42.7158	4.18903	1.19387	3.50878	0.000450166	0.00698452
ENSG00000261040	WFDC21P	16.3068	4.18317	1.36859	3.05654	0.00223906	0.0233647
ENSG00000146859	TMEM140	16.8269	4.15844	1.21404	3.42529	0.000614154	0.00888862
ENSG00000221963	APOL6	167.834	4.14071	1.25326	3.30395	0.000953336	0.0122669
ENSG00000162645	GBP2	53.8722	4.12646	0.76996	5.35932	8.35376e-08	5.70187e-06
ENSG00000119917	IFIT3	2248.16	4.09277	0.664825	6.15616	7.453e-10	8.8932e-08
ENSG00000049249	TNFRSF9	76.2623	4.06131	1.29293	3.14118	0.00168268	0.0189857
ENSG00000113140	SPARC	214.17	4.04992	0.937451	4.32015	1.55926e-05	0.000488882
ENSG00000213416	KRTAP4-12	10.3665	4.00724	1.44931	2.76493	0.00569353	0.0452496
ENSG00000234840	LINC01239	9.71959	4.00543	1.47406	2.71727	0.00658227	0.0501716
ENSG00000117152	RGS4	111.085	3.98944	0.452033	8.82555	1.08927e-18	7.22668e-16
ENSG00000147041	SYTL5	86.8736	3.92853	0.619273	6.34377	2.24204e-10	2.9513e-08
ENSG00000169508	GPR183	29.018	3.92008	0.777843	5.03968	4.66299e-07	2.63063e-05
ENSG00000144230	GPR17	20.3117	3.81133	1.02206	3.72908	0.000192177	0.00365534
ENSG00000133083	DCLK1	71.3564	3.80715	0.625093	6.09053	1.12539e-09	1.27848e-07
ENSG00000223485	LINC01615	32.3604	3.80486	0.859868	4.42493	9.64725e-06	0.000332283
ENSG00000198758	EPS8L3	140.098	3.80435	0.467549	8.1368	4.05862e-16	1.72606e-13
ENSG00000214402	LCNL1	12.0012	3.76699	1.41238	2.66712	0.00765052	0.0563373
ENSG00000262903		29.2819	3.67972	0.882719	4.16862	3.06448e-05	0.000827808
ENSG00000163739	CXCL1	427.629	3.67233	0.954203	3.84858	0.000118804	0.00248799
ENSG00000139192	TAPBPL	31.7197	3.65475	0.875345	4.17522	2.97704e-05	0.000810793
ENSG00000253931		60.4743	3.63953	0.607142	5.99452	2.04083e-09	2.12888e-07
ENSG00000169429	CXCL8	244.017	3.63049	0.445209	8.15457	3.50421e-16	1.5295e-13
ENSG00000262223		23.4707	3.58417	0.896262	3.99902	6.36059e-05	0.00149217
ENSG00000103355	PRSS33	95.718	3.57506	0.589307	6.06654	1.30691e-09	1.4451e-07
ENSG00000140678	ITGAX	159.954	3.51968	0.442636	7.95164	1.8406e-15	7.26863e-13
ENSG00000287315		16.7566	3.51636	1.08089	3.25321	0.00114109	0.0140778
ENSG00000153993	SEMA3D	79.8883	3.50571	0.550677	6.36618	1.9379e-10	2.57135e-08
ENSG00000168016	TRANK1	354.748	3.50095	1.01205	3.45927	0.000541637	0.00806046
ENSG00000205755	CRLF2	13.9424	3.4904	1.19762	2.91444	0.00356327	0.0332585
ENSG00000173762	CD7	29.7936	3.47779	0.795277	4.37305	1.22522e-05	0.000404811
ENSG00000075213	SEMA3A	1067.79	3.47252	0.299645	11.5888	4.69786e-31	9.73983e-28
ENSG00000132386	SERPINF1	119.204	3.4602	0.447624	7.73016	1.07413e-14	3.56311e-12
ENSG00000115009	CCL20	19.4188	3.45766	1.29786	2.66413	0.00771888	0.0566605
ENSG00000167281	RBFOX3	12.7391	3.45424	1.10882	3.11523	0.00183803	0.0202159
ENSG00000180176	TH	16.0117	3.44473	1.19355	2.88611	0.00390034	0.0353696
ENSG00000188282	RUFY4	26.5449	3.4342	1.13462	3.02673	0.00247217	0.0251864
ENSG00000254911	SCARNA9	9.58269	3.42766	1.35254	2.53424	0.011269	0.074023
ENSG00000143248	RGS5	402.987	3.42136	0.277812	12.3154	7.48569e-35	3.10394e-31
ENSG00000283525		29.1366	3.41342	0.8983	3.79986	0.000144777	0.00292126
ENSG00000187608	ISG15	34688.8	3.38015	0.63007	5.36472	8.10742e-08	5.57966e-06
ENSG00000174899	SLC66A1L	13.6875	3.37582	1.17179	2.88091	0.00396533	0.0358024
ENSG00000121858	TNFSF10	14.8802	3.33776	1.36649	2.44258	0.0145828	0.08889
ENSG00000287782		20.1748	3.33395	0.943234	3.53459	0.000408403	0.0064697
ENSG00000124140	SLC12A5	49.3476	3.27988	0.668072	4.90946	9.13257e-07	4.6607e-05
ENSG00000172183	ISG20	1344.41	3.27713	0.641051	5.11212	3.18559e-07	1.8539e-05
ENSG00000168961	LGALS9	183.591	3.19057	0.423519	7.53347	4.94093e-14	1.38899e-11
ENSG00000114771	AADAC	121.516	3.18516	0.423231	7.52583	5.23877e-14	1.44817e-11
ENSG00000229489	NA	13.1203	3.17984	1.18002	2.69475	0.00704424	0.0528191
ENSG00000023445	BIRC3	701.719	3.17414	0.344471	9.21454	3.12628e-20	2.82222e-17
ENSG00000157873	TNFRSF14	9.76574	3.174	1.3325	2.38198	0.0172198	0.0988948
ENSG00000254815	LMNTD2-AS1	149.559	3.15815	0.430674	7.33303	2.25004e-13	5.74141e-11
ENSG00000196611	MMP1	16.6291	3.15178	1.04468	3.01699	0.00255299	0.0258667
ENSG00000026025	VIM	1069.29	3.13602	0.29158	10.7553	5.59687e-27	1.03144e-23
ENSG00000163216	SPRR2D	97.1317	3.12983	0.641085	4.88207	1.04976e-06	5.30833e-05
ENSG00000124772	CPNE5	17.3057	3.11897	1.10682	2.81795	0.00483313	0.0403028
ENSG00000107611	CUBN	108.16	3.08513	0.407636	7.56835	3.78007e-14	1.08097e-11
ENSG00000148516	ZEB1	314.643	3.0839	0.35273	8.74294	2.27127e-18	1.39197e-15
ENSG00000261468		21.985	3.05761	0.875598	3.49203	0.000479373	0.00734832
ENSG00000105929	ATP6V0A4	11.0071	3.05362	1.12774	2.70774	0.00677426	0.0513284
ENSG00000100427	MLC1	12.1699	3.04748	1.15234	2.64459	0.0081789	0.0589037
ENSG00000277701		27.4113	3.04671	0.779445	3.90883	9.27459e-05	0.00203208
ENSG00000248544		12.7551	3.03711	1.19819	2.53475	0.0112526	0.0739446
ENSG00000079385	CEACAM1	295.553	3.02133	0.328016	9.21093	3.23298e-20	2.82222e-17
ENSG00000164530	PI16	19.971	3.0192	1.01553	2.97302	0.00294888	0.0290613
ENSG00000189001	SBSN	30.4919	3.01017	0.760837	3.95639	7.60897e-05	0.00173832
ENSG00000166268	MYRFL	10.7301	2.98789	1.17028	2.55313	0.0106759	0.0712275
ENSG00000088882	CPXM1	61.6178	2.96847	0.540209	5.49505	3.90598e-08	2.97177e-06
ENSG00000100154	TTC28	11.7364	2.96521	1.15409	2.5693	0.0101905	0.0690157
ENSG00000173702	MUC13	41.6272	2.95846	0.647102	4.57186	4.83415e-06	0.000191359
ENSG00000078401	EDN1	22.5266	2.95718	0.865526	3.41663	0.000634011	0.00912821
ENSG00000250508	LINC02701	22.9864	2.94465	0.882074	3.33833	0.000842834	0.0112645
ENSG00000168843	FSTL5	16.1843	2.94337	0.960776	3.06353	0.00218742	0.0230499
ENSG00000262691		15.1624	2.93891	1.03067	2.85146	0.00435187	0.0375547
ENSG00000238178		243.637	2.93668	0.34453	8.52371	1.54517e-17	7.53768e-15
ENSG00000272438		17.8258	2.93119	0.972735	3.01335	0.00258383	0.0260995
ENSG00000155918	RAET1L	284.242	2.92983	0.413573	7.08418	1.39868e-12	2.93652e-10
ENSG00000146592	CREB5	77.4665	2.90579	0.60779	4.78091	1.74503e-06	8.08466e-05
ENSG00000105499	PLA2G4C	273.288	2.90553	0.412213	7.04861	1.80717e-12	3.61129e-10
ENSG00000286379		15.0951	2.90483	1.04281	2.78559	0.00534309	0.0431874
ENSG00000133106	EPSTI1	84.0213	2.89882	0.682807	4.24544	2.18163e-05	0.000633704
ENSG00000109758	HGFAC	27.1401	2.87571	0.754012	3.81388	0.000136802	0.00277724
ENSG00000125845	BMP2	24.5818	2.85062	0.863938	3.29957	0.000968343	0.0124214
ENSG00000286056		15.8409	2.84935	1.00981	2.82168	0.00477735	0.0399985
ENSG00000184925	LCN12	42.1977	2.84725	0.652552	4.36326	1.28136e-05	0.000418359
ENSG00000167617	CDC42EP5	118.661	2.8304	0.477269	5.9304	3.02192e-09	3.03767e-07
ENSG00000254338	MAFA-AS1	20.5275	2.81163	0.898497	3.12925	0.0017525	0.0195
ENSG00000250271		31.8636	2.80489	0.678507	4.13392	3.56635e-05	0.000936559
ENSG00000107201	DDX58	2708.66	2.78628	0.516481	5.39474	6.86234e-08	4.76229e-06
ENSG00000197540	GZMM	17.218	2.78155	0.908075	3.06313	0.00219035	0.0230576
ENSG00000138646	HERC5	3615.61	2.78025	0.733456	3.79062	0.000150271	0.00301743
ENSG00000129946	SHC2	243.806	2.75009	0.363151	7.57288	3.65048e-14	1.06223e-11
ENSG00000169885	CALML6	31.5503	2.74129	0.742364	3.69265	0.000221932	0.00403552
ENSG00000205312	KRT17P4	15.9499	2.73366	1.00238	2.72718	0.00638775	0.0490365
ENSG00000207870	MIR221	40.5608	2.7311	0.656135	4.16241	3.14902e-05	0.000847884
ENSG00000164484	TMEM200A	1843.42	2.70523	0.175822	15.3862	2.02493e-53	3.35855e-49
ENSG00000115267	IFIH1	1700.82	2.69306	0.813068	3.31222	0.0009256	0.0120033
ENSG00000099250	NRP1	307.598	2.69202	0.30236	8.90337	5.41767e-19	3.74406e-16
ENSG00000091879	ANGPT2	288.566	2.67296	0.345054	7.74648	9.44751e-15	3.19789e-12
ENSG00000188687	SLC4A5	19.0627	2.65988	0.970801	2.73988	0.00614612	0.0475686
ENSG00000111859	NEDD9	35.0436	2.64466	0.923466	2.86384	0.0041854	0.0366315
ENSG00000169994	MYO7B	26.4906	2.63929	0.794637	3.32138	0.000895724	0.0117344
ENSG00000085514	PILRA	32.8335	2.63682	0.688445	3.83012	0.000128083	0.00262593
ENSG00000124116	WFDC3	80.2698	2.60711	0.474773	5.49128	3.99032e-08	3.01036e-06
ENSG00000057468	MSH4	30.2122	2.58986	0.777275	3.33197	0.000862328	0.0114238
ENSG00000153902	LGI4	29.6032	2.58242	0.768944	3.3584	0.000783949	0.0107105
ENSG00000260306		13.9849	2.58056	0.964957	2.67428	0.00748907	0.0554894
ENSG00000136305	CIDEB	14.0678	2.56883	1.07929	2.38011	0.0173077	0.0993304
ENSG00000135318	NT5E	6119.63	2.56389	0.254645	10.0685	7.61444e-24	9.71485e-21
ENSG00000164483	SAMD3	184.095	2.56095	0.326059	7.85425	4.02165e-15	1.41921e-12
ENSG00000187621	TCL6	23.8505	2.55679	0.928816	2.75274	0.00590993	0.0463023
ENSG00000266714	MYO15B	1354.75	2.54336	0.538197	4.7257	2.2932e-06	0.000101525
ENSG00000163762	TM4SF18	87.8442	2.54105	0.636325	3.99332	6.51543e-05	0.00152204
ENSG00000275491	LINC01730	31.9447	2.53845	0.67705	3.74928	0.000177344	0.00341629
ENSG00000133246	PRAM1	33.4911	2.51951	0.715727	3.52021	0.000431205	0.0067727
ENSG00000143369	ECM1	501.454	2.51678	0.343652	7.32363	2.41345e-13	6.06506e-11
ENSG00000224819		31.6618	2.51676	0.707553	3.55699	0.000375133	0.00608802
ENSG00000258875		29.4123	2.5132	0.73392	3.42435	0.000616272	0.0089115
ENSG00000269954		22.4505	2.49845	0.822029	3.03937	0.00237071	0.0243925
ENSG00000197467	COL13A1	905.874	2.49104	0.315516	7.89514	2.90001e-15	1.06888e-12
ENSG00000147883	CDKN2B	629.086	2.49024	0.21254	11.7165	1.04867e-31	2.89887e-28
ENSG00000167578	RAB4B	15.012	2.48708	0.99351	2.50333	0.0123032	0.0785031
ENSG00000130066	SAT1	17064.6	2.483	0.547399	4.53599	5.73337e-06	0.000214658
ENSG00000105519	CAPS	63.8765	2.46635	0.527334	4.67701	2.91085e-06	0.000124823
ENSG00000273445		22.5736	2.45262	1.00671	2.43627	0.0148398	0.0897311
ENSG00000122877	EGR2	176.607	2.44953	0.887581	2.75978	0.00578396	0.045704
ENSG00000226145	KRT16P6	46.3883	2.44909	0.708141	3.45848	0.00054323	0.00807349
ENSG00000236714	LINC01844	26.234	2.44784	0.786137	3.11376	0.00184721	0.0202819
ENSG00000205413	SAMD9	1297.1	2.44514	0.228188	10.7155	8.6108e-27	1.42819e-23
ENSG00000225756	DBH-AS1	73.3993	2.4439	0.568782	4.29672	1.73345e-05	0.000531443
ENSG00000240065	PSMB9	539.575	2.43367	0.844993	2.88011	0.00397542	0.0358155
ENSG00000186510	CLCNKA	16.8637	2.4276	1.02134	2.37687	0.0174604	0.099827
ENSG00000158815	FGF17	82.5177	2.42437	0.457717	5.29666	1.17939e-07	7.73177e-06
ENSG00000197093	GAL3ST4	236.219	2.41613	0.290502	8.31709	9.01489e-17	4.15336e-14
ENSG00000115461	IGFBP5	23.6059	2.41166	0.897404	2.68737	0.00720163	0.0537044
ENSG00000286977		20.8709	2.39681	0.853251	2.80904	0.00496902	0.0411053
ENSG00000185507	IRF7	1837.75	2.3922	0.835618	2.86279	0.00419925	0.0366766
ENSG00000286190		31.3741	2.38836	0.851732	2.80412	0.00504536	0.0415503
ENSG00000239653	PSMD6-AS2	19.0629	2.38675	0.945709	2.52377	0.0116104	0.0754602
ENSG00000182179	UBA7	108.125	2.37337	0.4714	5.03472	4.78539e-07	2.69053e-05
ENSG00000198520	ARMH1	42.0539	2.36734	0.636862	3.71719	0.000201447	0.00376413
ENSG00000184995	IFNE	20.3605	2.35854	0.834091	2.82767	0.00468874	0.0393959
ENSG00000186642	PDE2A	868.91	2.3485	0.579951	4.04948	5.13309e-05	0.00125387
ENSG00000114270	COL7A1	442.933	2.34798	0.319085	7.35846	1.86043e-13	4.89796e-11
ENSG00000213366	GSTM2	45.7874	2.34395	0.668111	3.50833	0.000450931	0.00698492
ENSG00000186594	MIR22HG	195.772	2.3276	0.326097	7.13775	9.48719e-13	2.01736e-10
ENSG00000227954	TARID	52.5695	2.32718	0.643543	3.61621	0.000298949	0.0050855
ENSG00000147606	SLC26A7	18.5267	2.32474	0.943232	2.46465	0.0137147	0.0853207
ENSG00000204264	PSMB8	45.0537	2.32455	0.828581	2.80546	0.00502449	0.0414402
ENSG00000133055	MYBPH	71.9682	2.32022	0.620638	3.73844	0.000185165	0.00354635
ENSG00000239620	PRR20G	30.0387	2.30318	0.954624	2.41266	0.0158366	0.0936753
ENSG00000112139	MDGA1	757.455	2.29798	0.257684	8.91782	4.75541e-19	3.42927e-16
ENSG00000255423	EBLN2	29.6415	2.29418	0.733215	3.12894	0.00175438	0.0195
ENSG00000143341	HMCN1	80.3082	2.29216	0.473189	4.84406	1.27212e-06	6.16941e-05
ENSG00000125730	C3	174.014	2.28588	0.45539	5.01961	5.17766e-07	2.89022e-05
ENSG00000135625	EGR4	83.7306	2.28201	0.620105	3.68004	0.000233198	0.00416791
ENSG00000106366	SERPINE1	2625.42	2.28111	0.534588	4.26705	1.98076e-05	0.000589818
ENSG00000254605		28.0952	2.28088	0.802517	2.84216	0.00448093	0.0383361
ENSG00000153234	NR4A2	1886.58	2.2733	0.182772	12.4379	1.628e-35	9.00069e-32
ENSG00000109511	ANXA10	566.129	2.26594	0.294823	7.68576	1.5209e-14	4.8511e-12
ENSG00000118292	C1orf54	24.1839	2.25846	0.804313	2.80794	0.00498594	0.0411837
ENSG00000143127	ITGA10	85.7792	2.25834	0.513507	4.39788	1.09315e-05	0.000367024
ENSG00000185020	NA	70.4148	2.25182	0.463166	4.8618	1.16321e-06	5.77635e-05
ENSG00000157601	MX1	118.483	2.2506	0.530716	4.24069	2.22836e-05	0.000642775
ENSG00000127863	TNFRSF19	109.183	2.24603	0.409319	5.48725	4.08245e-08	3.06387e-06
ENSG00000060566	CREB3L3	187.721	2.24602	0.33237	6.7576	1.40294e-11	2.42414e-09
ENSG00000243978	RTL9	19.2757	2.24204	0.921339	2.43346	0.0149554	0.0902331
ENSG00000170500	LONRF2	421.633	2.24078	0.262564	8.53425	1.41072e-17	7.09039e-15
ENSG00000155657	TTN	64.8552	2.23432	0.546606	4.08762	4.35812e-05	0.00110695
ENSG00000163121	NEURL3	26.5801	2.21903	0.871798	2.54535	0.0109168	0.0723105
ENSG00000119508	NR4A3	57.7483	2.21813	0.671155	3.30494	0.000949974	0.0122522
ENSG00000115556	PLCD4	17.261	2.21784	0.928537	2.38853	0.0169161	0.0978279
ENSG00000062524	LTK	806.994	2.21684	0.210576	10.5275	6.454e-26	9.73146e-23
ENSG00000122733	PHF24	22.5096	2.21168	0.887108	2.49314	0.0126619	0.080126
ENSG00000187134	AKR1C1	22.0468	2.19805	0.869657	2.52749	0.011488	0.0749564
ENSG00000181804	SLC9A9	27.9658	2.19192	0.708391	3.09422	0.00197333	0.0213296
ENSG00000120051	CFAP58	36.6513	2.18842	0.634362	3.44979	0.00056102	0.00828591
ENSG00000164120	HPGD	20.6794	2.18748	0.82583	2.64883	0.00807718	0.0583991
ENSG00000147251	DOCK11	23.7043	2.18486	0.836868	2.61075	0.00903427	0.0630915
ENSG00000146221	TCTE1	23.6668	2.17146	0.777234	2.79382	0.00520887	0.0425378
ENSG00000197249	SERPINA1	528.316	2.16957	0.323466	6.70726	1.98314e-11	3.32245e-09
ENSG00000280303	ERICD	71.8674	2.16641	0.459883	4.71078	2.46774e-06	0.000107711
ENSG00000172348	RCAN2	105.586	2.15236	0.385683	5.58065	2.39628e-08	1.94827e-06
ENSG00000099869	IGF2-AS	22.0633	2.14656	0.893064	2.40359	0.0162351	0.0950158
ENSG00000148677	ANKRD1	19.8814	2.1442	0.872364	2.45792	0.0139743	0.0865488
ENSG00000136010	ALDH1L2	40.212	2.13573	0.752779	2.83713	0.00455213	0.0387158
ENSG00000152154	TMEM178A	22.3543	2.13491	0.797338	2.67755	0.00741624	0.0550608
ENSG00000197558	SSPOP	127.812	2.13474	0.381578	5.59451	2.21244e-08	1.81661e-06
ENSG00000112769	LAMA4	67.9961	2.12717	0.584739	3.6378	0.000274974	0.00473611
ENSG00000164136	IL15	69.7508	2.12706	0.531375	4.00294	6.25607e-05	0.00147182
ENSG00000164308	ERAP2	76.8307	2.11488	0.478471	4.42009	9.86592e-06	0.000338592
ENSG00000164509	IL31RA	23.1022	2.1127	0.866011	2.43958	0.0147043	0.0892006
ENSG00000104419	NDRG1	13909.8	2.11093	0.246768	8.55432	1.1857e-17	6.14564e-15
ENSG00000245552		34.8583	2.10603	0.61613	3.41816	0.000630471	0.00909303
ENSG00000142046	TMEM91	79.8526	2.10332	0.51027	4.12197	3.75645e-05	0.000978091
ENSG00000038427	VCAN	4536.1	2.10196	0.230098	9.13507	6.53648e-20	5.4207e-17
ENSG00000140839	CLEC18B	31.6712	2.09935	0.703535	2.984	0.0028451	0.0282737
ENSG00000228541		28.7683	2.09871	0.702251	2.98855	0.00280304	0.0279731
ENSG00000134827	TCN1	88.0379	2.08995	0.44833	4.66164	3.13699e-06	0.000133069
ENSG00000215142	NA	45.7554	2.07039	0.554906	3.73107	0.000190669	0.00363498
ENSG00000230606		35.981	2.06921	0.679966	3.0431	0.00234151	0.024167
ENSG00000185198	PRSS57	29.3549	2.06678	0.710265	2.90987	0.00361574	0.0336159
ENSG00000121966	CXCR4	33.5082	2.0647	0.629383	3.28051	0.00103618	0.0130793
ENSG00000068079	IFI35	1621.35	2.06304	0.51755	3.98616	6.71501e-05	0.00156422
ENSG00000102032	RENBP	30.3962	2.05462	0.687582	2.98818	0.00280644	0.0279789
ENSG00000163297	ANTXR2	491.42	2.04098	0.223762	9.12122	7.42811e-20	5.86679e-17
ENSG00000171401	KRT13	425.344	2.03849	0.700187	2.91135	0.00359872	0.033514
ENSG00000166510	CCDC68	377.216	2.03511	0.28186	7.22027	5.18851e-13	1.19523e-10
ENSG00000258927		24.3263	2.03424	0.810195	2.51081	0.0120455	0.0774969
ENSG00000064989	CALCRL	26.1241	2.03358	0.792002	2.56764	0.0102393	0.0691936
ENSG00000144821	MYH15	1529.05	2.03356	0.232697	8.73909	2.34989e-18	1.39197e-15
ENSG00000137628	DDX60	828.397	2.02876	0.257736	7.87147	3.50495e-15	1.26376e-12
ENSG00000222009	BTBD19	166.651	2.01981	0.388939	5.19313	2.06788e-07	1.28456e-05
ENSG00000143387	CTSK	69.4766	2.00128	0.500949	3.99497	6.47013e-05	0.00151573
ENSG00000230454		30.8451	1.99477	0.743788	2.6819	0.00732049	0.0544718
ENSG00000137880	GCHFR	96.5802	1.9861	0.414272	4.79419	1.63336e-06	7.63125e-05
ENSG00000104368	PLAT	1756.02	1.98453	0.211232	9.39503	5.72013e-21	6.32494e-18
ENSG00000174460	ZCCHC12	254.734	1.9809	0.296691	6.67666	2.44455e-11	3.91175e-09
ENSG00000237075	NA	27.5453	1.98082	0.716411	2.76492	0.00569372	0.0452496
ENSG00000250067	YJEFN3	427.732	1.97111	0.300269	6.56448	5.22155e-11	7.87314e-09
ENSG00000019549	SNAI2	78.7105	1.97094	0.498153	3.95651	7.60541e-05	0.00173832
ENSG00000249992	TMEM158	1197.24	1.96978	0.210966	9.33697	9.91301e-21	9.6716e-18
ENSG00000170011	MYRIP	56.5953	1.96803	0.68261	2.8831	0.0039378	0.0355926
ENSG00000261253		90.4058	1.96144	0.431788	4.5426	5.55639e-06	0.000210407
ENSG00000104059	FAM189A1	40.9828	1.95629	0.597383	3.27476	0.00105752	0.0132751
ENSG00000135636	DYSF	157.792	1.95564	0.375803	5.2039	1.95149e-07	1.22141e-05
ENSG00000229334		19.6087	1.95095	0.81413	2.39636	0.0165589	0.0961982
ENSG00000138496	PARP9	1336.78	1.94679	0.752756	2.58622	0.00970346	0.0664225
ENSG00000188747	NOXA1	875.573	1.93587	0.261302	7.40853	1.27707e-13	3.41638e-11
ENSG00000251562	MALAT1	2013.46	1.9303	0.593754	3.25101	0.00114995	0.0141597
ENSG00000156042	CFAP70	73.6441	1.92811	0.596435	3.23273	0.00122614	0.0148661
ENSG00000100100	PIK3IP1	59.5767	1.92495	0.557314	3.45398	0.000552371	0.00817272
ENSG00000142606	MMEL1	129.3	1.92417	0.39434	4.87947	1.06372e-06	5.34633e-05
ENSG00000205560	CPT1B	32.4882	1.92412	0.70772	2.71876	0.00655268	0.0500031
ENSG00000165507	DEPP1	292.815	1.91092	0.286197	6.67694	2.43976e-11	3.91175e-09
ENSG00000197599	CCDC154	33.2004	1.90492	0.713359	2.67035	0.00757711	0.0559546
ENSG00000112782	CLIC5	27.6869	1.90063	0.727861	2.61126	0.00902101	0.0630255
ENSG00000203727	SAMD5	502.061	1.89864	0.297291	6.38648	1.6975e-10	2.28901e-08
ENSG00000274750	H3C6	102.33	1.89581	0.436198	4.34623	1.38499e-05	0.000447788
ENSG00000213901	SLC23A3	26.1863	1.89316	0.698254	2.71127	0.00670258	0.0509016
ENSG00000011028	MRC2	2170.73	1.89015	0.215558	8.76864	1.8083e-18	1.15356e-15
ENSG00000170049	KCNAB3	113.359	1.8897	0.44352	4.26069	2.03794e-05	0.000599312
ENSG00000230699		33.2008	1.88265	0.762403	2.46936	0.0135354	0.0843659
ENSG00000231389	HLA-DPA1	73.1966	1.88244	0.584537	3.22039	0.00128016	0.0153972
ENSG00000172508	CARNS1	133.369	1.87753	0.382334	4.9107	9.07526e-07	4.64575e-05
ENSG00000121075	TBX4	41.8243	1.87547	0.599878	3.12641	0.00176952	0.0196185
ENSG00000176681	LRRC37A	32.76	1.86975	0.674494	2.77207	0.00557008	0.0445875
ENSG00000129538	RNASE1	119.678	1.86872	0.428646	4.35958	1.30311e-05	0.000424623
ENSG00000006468	ETV1	1633.43	1.85972	0.205138	9.06567	1.23846e-19	9.33687e-17
ENSG00000215769	ARHGAP27P1-BPTFP1-KPNA2P3	49.853	1.84745	0.59692	3.09498	0.00196829	0.0213047
ENSG00000168398	BDKRB2	47.7414	1.84381	0.747667	2.46609	0.0136598	0.0850137
ENSG00000227199	ST7-AS1	29.5875	1.83734	0.728041	2.52368	0.0116133	0.0754602
ENSG00000061455	PRDM6	26.2193	1.83678	0.715294	2.56787	0.0102326	0.0691936
ENSG00000163354	DCST2	86.5604	1.83524	0.443576	4.13738	3.51301e-05	0.000927815
ENSG00000168952	STXBP6	59.4128	1.82649	0.642687	2.84197	0.00448362	0.0383361
ENSG00000255508		25.5114	1.81328	0.722405	2.51006	0.012071	0.0775573
ENSG00000111801	BTN3A3	278.209	1.81076	0.298027	6.07582	1.23356e-09	1.39183e-07
ENSG00000209482	SNORD83A	25.9894	1.80052	0.700538	2.5702	0.010164	0.0688926
ENSG00000271447	MMP28	132.843	1.79758	0.469434	3.82926	0.00012853	0.00263185
ENSG00000159403	C1R	180.183	1.79641	0.347701	5.16654	2.38469e-07	1.4595e-05
ENSG00000231133	HAR1B	38.718	1.79489	0.684903	2.62065	0.00877616	0.0618095
ENSG00000133640	LRRIQ1	32.2109	1.79408	0.723318	2.48034	0.0131256	0.0824
ENSG00000258474	LINC02313	28.9987	1.79044	0.737705	2.42704	0.0152226	0.0913467
ENSG00000283709	FAM238C	89.7932	1.78535	0.469826	3.80001	0.000144687	0.00292126
ENSG00000155428	TRIM74	49.9707	1.78465	0.589393	3.02794	0.00246229	0.0251165
ENSG00000213199	ASIC3	204.664	1.77968	0.307597	5.78573	7.21975e-09	6.6526e-07
ENSG00000261754		28.8462	1.77778	0.709012	2.5074	0.0121623	0.0779762
ENSG00000128482	RNF112	26.9616	1.77398	0.74578	2.37869	0.0173743	0.0996439
ENSG00000187720	THSD4	1403.69	1.76816	0.281582	6.2794	3.39893e-10	4.37013e-08
ENSG00000224660	SH3BP5-AS1	149.118	1.76495	0.432006	4.08547	4.39869e-05	0.00111398
ENSG00000165072	MAMDC2	197.1	1.76217	0.325718	5.4101	6.29909e-08	4.42698e-06
ENSG00000135604	STX11	125.086	1.76135	0.433556	4.06256	4.8537e-05	0.00120695
ENSG00000135363	LMO2	213.514	1.75838	0.293227	5.99664	2.0144e-09	2.11461e-07
ENSG00000163032	VSNL1	1452.39	1.75626	0.299675	5.86057	4.61291e-09	4.39711e-07
ENSG00000164850	GPER1	378.174	1.74879	0.253966	6.88594	5.7408e-12	1.0597e-09
ENSG00000244560		83.2431	1.74734	0.495005	3.52995	0.000415642	0.00656113
ENSG00000105559	PLEKHA4	2147.5	1.74651	0.261122	6.68847	2.2551e-11	3.74032e-09
ENSG00000163072	NOSTRIN	54.9569	1.74122	0.535796	3.24978	0.00115494	0.0142
ENSG00000104856	RELB	1993.85	1.73003	0.285843	6.05238	1.42725e-09	1.55739e-07
ENSG00000111700	SLCO1B3	41.6983	1.7285	0.583342	2.9631	0.00304561	0.0297144
ENSG00000159713	TPPP3	52.2326	1.727	0.541409	3.18983	0.00142358	0.0168412
ENSG00000073910	FRY	106.913	1.72465	0.388488	4.4394	9.02086e-06	0.000314328
ENSG00000196358	NTNG2	189.545	1.72435	0.371235	4.64491	3.40221e-06	0.000141426
ENSG00000072182	ASIC4	71.8055	1.72411	0.496927	3.46954	0.000521357	0.00781141
ENSG00000137877	SPTBN5	132.037	1.7218	0.376874	4.56863	4.90911e-06	0.000193403
ENSG00000147437	GNRH1	30.9716	1.72017	0.704974	2.44004	0.0146855	0.0891684
ENSG00000254973		43.2616	1.71964	0.58494	2.93985	0.00328368	0.0313909
ENSG00000254416	LINC02732	160.913	1.71846	0.38065	4.51455	6.34519e-06	0.0002313
ENSG00000255182		55.6944	1.71614	0.540254	3.17655	0.00149037	0.0173713
ENSG00000135205	CCDC146	183.392	1.71552	0.370742	4.62726	3.70534e-06	0.000153259
ENSG00000279692		233.069	1.71158	0.289546	5.91126	3.39507e-09	3.3719e-07
ENSG00000240602	AADACP1	80.2484	1.70159	0.42203	4.03192	5.53221e-05	0.00133082
ENSG00000235703	LINC00894	55.371	1.69367	0.535257	3.16421	0.00155503	0.0178985
ENSG00000147255	IGSF1	85.5789	1.69342	0.492062	3.44147	0.00057857	0.00844733
ENSG00000157343	ARMC12	51.5396	1.68921	0.601169	2.80987	0.00495609	0.0410803
ENSG00000118503	TNFAIP3	679.571	1.68905	0.335871	5.02886	4.93406e-07	2.76474e-05
ENSG00000270069	MIR222HG	280.138	1.6834	0.364143	4.62289	3.78428e-06	0.000155362
ENSG00000128573	FOXP2	67.0522	1.68241	0.565494	2.97512	0.00292876	0.0289334
ENSG00000099338	CATSPERG	41.9466	1.68178	0.60414	2.78375	0.00537336	0.0433898
ENSG00000261189		62.2089	1.68013	0.466667	3.60028	0.000317873	0.00534169
ENSG00000256128	LINC00944	82.5672	1.67879	0.542986	3.09178	0.00198963	0.0214844
ENSG00000179954	SSC5D	63.2012	1.67859	0.490296	3.42362	0.000617933	0.00892773
ENSG00000167371	PRRT2	84.2164	1.67445	0.456679	3.66657	0.000245825	0.00435139
ENSG00000139946	PELI2	79.0783	1.6744	0.446713	3.74828	0.000178052	0.00342596
ENSG00000172638	EFEMP2	91.9641	1.67416	0.479677	3.49018	0.000482701	0.00738568
ENSG00000267288		51.8969	1.66929	0.574002	2.90817	0.00363554	0.0337243
ENSG00000127415	IDUA	1090.34	1.6689	0.205363	8.12657	4.416e-16	1.8311e-13
ENSG00000226835	ARHGAP29-AS1	38.0489	1.66583	0.688838	2.41832	0.0155924	0.0928873
ENSG00000075826	SEC31B	807.199	1.66543	0.318605	5.22725	1.72051e-07	1.08917e-05
ENSG00000179715	PCED1B	29.2532	1.66344	0.696929	2.38682	0.0169949	0.0980442
ENSG00000196139	AKR1C3	64.9541	1.6634	0.67349	2.46982	0.0135181	0.0843216
ENSG00000026652	AGPAT4	827.939	1.66052	0.25941	6.40117	1.54194e-10	2.11361e-08
ENSG00000213782	DDX47	38.1656	1.66009	0.686954	2.4166	0.0156661	0.0930985
ENSG00000172901	LVRN	33.7784	1.65883	0.634837	2.613	0.00897526	0.0627964
ENSG00000182685	BRICD5	356.621	1.65566	0.274634	6.02861	1.65372e-09	1.78107e-07
ENSG00000215788	TNFRSF25	726.346	1.65536	0.246788	6.70764	1.97796e-11	3.32245e-09
ENSG00000151006	PRSS53	153.999	1.65516	0.45209	3.66113	0.000251107	0.00442599
ENSG00000233589		269.722	1.65371	0.290028	5.70188	1.18492e-08	1.05096e-06
ENSG00000104899	AMH	1220.17	1.65221	0.257384	6.41922	1.36978e-10	1.94181e-08
ENSG00000258727		121.357	1.64772	0.394	4.18203	2.88922e-05	0.00079551
ENSG00000226332		130.132	1.64684	0.383942	4.28931	1.7923e-05	0.000544452
ENSG00000188153	COL4A5	964.791	1.64515	0.227303	7.23771	4.56336e-13	1.08125e-10
ENSG00000242574	HLA-DMB	73.3012	1.64226	0.467065	3.51613	0.000437894	0.00685827
ENSG00000161270	NPHS1	45.2026	1.64092	0.650421	2.52286	0.0116405	0.0755355
ENSG00000260196		32.3193	1.63834	0.661734	2.47582	0.0132929	0.0831987
ENSG00000091536	MYO15A	133.96	1.63806	0.3444	4.75627	1.972e-06	8.93649e-05
ENSG00000270441	LAMB2P1	40.7562	1.63732	0.653554	2.50526	0.0122361	0.078328
ENSG00000011422	PLAUR	6363.36	1.63557	0.491962	3.32459	0.0008855	0.011647
ENSG00000188818	ZDHHC11	211.392	1.6353	0.314651	5.19721	2.02304e-07	1.26143e-05
ENSG00000249898	MCPH1-AS1	51.001	1.63523	0.542545	3.01399	0.00257833	0.0260598
ENSG00000255031		93.8356	1.63517	0.462314	3.53693	0.000404802	0.00642444
ENSG00000110876	SELPLG	57.0105	1.63398	0.495327	3.29879	0.00097104	0.0124464
ENSG00000105270	CLIP3	71.4677	1.63257	0.442965	3.68555	0.000228206	0.00410078
ENSG00000256980	KHDC1L	31.6935	1.63126	0.639306	2.55161	0.0107227	0.071453
ENSG00000118523	CCN2	142.835	1.63	0.49965	3.26228	0.0011052	0.0137619
ENSG00000196126	HLA-DRB1	162.665	1.62873	0.461519	3.52906	0.000417037	0.00657507
ENSG00000105383	CD33	344.325	1.62241	0.33378	4.86073	1.16952e-06	5.79033e-05
ENSG00000186417	GLDN	107.009	1.62084	0.427384	3.79247	0.000149158	0.00299871
ENSG00000103269	RHBDL1	355.057	1.62001	0.354033	4.57587	4.74237e-06	0.000188353
ENSG00000167874	TMEM88	36.9981	1.61756	0.598329	2.70347	0.00686193	0.0518349
ENSG00000204305	AGER	267.979	1.61604	0.388365	4.16113	3.16679e-05	0.000851287
ENSG00000162461	SLC25A34	35.5273	1.6149	0.647054	2.49577	0.0125686	0.079718
ENSG00000123201	GUCY1B2	89.4957	1.60734	0.431601	3.72413	0.000195992	0.00369185
ENSG00000132744	ACY3	38.3221	1.60434	0.593864	2.70153	0.00690203	0.0519475
ENSG00000147257	GPC3	54.1247	1.60376	0.558375	2.87219	0.00407632	0.0361088
ENSG00000085465	OVGP1	181.668	1.60125	0.321067	4.98727	6.12384e-07	3.31928e-05
ENSG00000108465	CDK5RAP3	689.691	1.60019	0.316032	5.06339	4.11872e-07	2.36239e-05
ENSG00000214595	EML6	228.977	1.60008	0.330047	4.84805	1.24683e-06	6.10028e-05
ENSG00000003436	TFPI	515.007	1.59728	0.217326	7.34969	1.98672e-13	5.14871e-11
ENSG00000189058	APOD	61.9826	1.59662	0.550198	2.9019	0.00370907	0.034196
ENSG00000179698	WDR97	53.1362	1.5964	0.604643	2.64023	0.00828495	0.0594352
ENSG00000215252	GOLGA8B	400.082	1.59142	0.337239	4.71896	2.37048e-06	0.000103738
ENSG00000105939	ZC3HAV1	5341.28	1.59118	0.598274	2.65962	0.0078229	0.0572325
ENSG00000213139	CRYGS	59.1249	1.58772	0.505635	3.14006	0.00168914	0.0190197
ENSG00000181085	MAPK15	1059.43	1.5824	0.282541	5.6006	2.13607e-08	1.76263e-06
ENSG00000204681	GABBR1	1027.3	1.57832	0.268259	5.88356	4.01527e-09	3.89458e-07
ENSG00000268655		65.0451	1.5746	0.49009	3.21287	0.00131417	0.0157258
ENSG00000246695	RASSF8-AS1	90.8646	1.57322	0.410304	3.83429	0.000125928	0.00260755
ENSG00000142303	ADAMTS10	510.563	1.57183	0.245437	6.40418	1.51177e-10	2.08952e-08
ENSG00000225972	MTND1P23	50.3422	1.57001	0.589594	2.66287	0.00774767	0.0567843
ENSG00000144802	NFKBIZ	347.364	1.56786	0.324053	4.8383	1.30956e-06	6.33245e-05
ENSG00000088881	EBF4	729.912	1.56596	0.243348	6.43507	1.23417e-10	1.77999e-08
ENSG00000178623	GPR35	107.128	1.56262	0.414631	3.76871	0.000164093	0.00322089
ENSG00000251138	LINC02882	90.4284	1.5625	0.43274	3.61073	0.000305341	0.00517831
ENSG00000196159	FAT4	94.5764	1.5596	0.401443	3.88499	0.000102334	0.00220716
ENSG00000152784	PRDM8	91.318	1.55789	0.448284	3.47524	0.000510395	0.00770283
ENSG00000162572	SCNN1D	269.453	1.55581	0.351097	4.43127	9.36785e-06	0.000325734
ENSG00000171033	PKIA	205.322	1.55511	0.298323	5.21284	1.85974e-07	1.1684e-05
ENSG00000230795	HLA-K	44.5698	1.55391	0.614444	2.52896	0.01144	0.0747025
ENSG00000159231	CBR3	85.2098	1.54752	0.416325	3.71709	0.000201528	0.00376413
ENSG00000174808	BTC	142.017	1.54571	0.347701	4.44551	8.76838e-06	0.000307468
ENSG00000137941	TTLL7	593.529	1.54561	0.224652	6.88003	5.98409e-12	1.09068e-09
ENSG00000104324	CPQ	79.2256	1.54469	0.581577	2.65604	0.00790636	0.057534
ENSG00000240990	HOXA11-AS	112.991	1.54247	0.360166	4.28265	1.84677e-05	0.000558951
ENSG00000165169	DYNLT3	851.646	1.53989	0.30034	5.12717	2.94135e-07	1.72386e-05
ENSG00000140279	DUOX2	70.9934	1.53862	0.4586	3.35504	0.00079353	0.0107881
ENSG00000088340	FER1L4	315.662	1.53067	0.335618	4.56076	5.0968e-06	0.000197513
ENSG00000256667	KLRA1P	62.3287	1.52711	0.54696	2.79199	0.00523849	0.0426586
ENSG00000074660	SCARF1	97.3385	1.52697	0.446764	3.41785	0.000631183	0.00909539
ENSG00000102678	FGF9	146.996	1.52364	0.396053	3.84707	0.000119541	0.0024971
ENSG00000104870	FCGRT	69.5309	1.52314	0.505807	3.01131	0.00260122	0.0262432
ENSG00000162552	WNT4	113.386	1.52157	0.52308	2.90886	0.00362745	0.0336717
ENSG00000220785	MTMR9LP	232.386	1.52136	0.286129	5.31705	1.05465e-07	6.99695e-06
ENSG00000147174	GCNA	36.1728	1.51663	0.617565	2.45582	0.0140564	0.0868704
ENSG00000240053	LY6G5B	53.3011	1.51653	0.51715	2.93248	0.00336265	0.0319574
ENSG00000088992	TESC	2093	1.51615	0.234774	6.45793	1.06147e-10	1.55802e-08
ENSG00000158106	RHPN1	3195.13	1.51498	0.209657	7.22597	4.9752e-13	1.16223e-10
ENSG00000237238	BMS1P10	74.4878	1.51074	0.430623	3.50827	0.000451034	0.00698492
ENSG00000168874	ATOH8	135.849	1.50877	0.333824	4.51964	6.19444e-06	0.000227004
ENSG00000235750	KIAA0040	3001.19	1.50844	0.255481	5.9043	3.54139e-09	3.49628e-07
ENSG00000251136		201.18	1.5047	0.331864	4.53407	5.78582e-06	0.000216134
ENSG00000176046	NUPR1	65.7985	1.50407	0.523745	2.87175	0.004082	0.0361088
ENSG00000140682	TGFB1I1	1260.58	1.50263	0.210163	7.14986	8.68665e-13	1.89575e-10
ENSG00000135596	MICAL1	2531.29	1.50183	0.192628	7.79652	6.36365e-15	2.1989e-12
ENSG00000151150	ANK3	328.941	-1.51617	0.276441	-5.48461	4.14381e-08	3.09591e-06
ENSG00000268798		64.5191	-1.5283	0.531209	-2.87701	0.00401458	0.0359535
ENSG00000169403	PTAFR	114.385	-1.53412	0.393475	-3.89891	9.66258e-05	0.00210044
ENSG00000137648	TMPRSS4	55.2259	-1.54057	0.572799	-2.68954	0.00715499	0.0534562
ENSG00000212232	SNORD17	64.9877	-1.55843	0.459709	-3.39003	0.000698857	0.00989014
ENSG00000189334	S100A14	9768.06	-1.56311	0.265878	-5.87905	4.12633e-09	3.95603e-07
ENSG00000008056	SYN1	43.5721	-1.56641	0.64038	-2.44607	0.0144423	0.0882611
ENSG00000184292	TACSTD2	309.966	-1.57148	0.329041	-4.77596	1.78856e-06	8.26326e-05
ENSG00000157992	KRTCAP3	1531.44	-1.58457	0.183892	-8.61682	6.88379e-18	3.68305e-15
ENSG00000111348	ARHGDIB	67.4426	-1.5962	0.464183	-3.43872	0.000584461	0.00852583
ENSG00000187808	SOWAHD	47.1799	-1.5982	0.558346	-2.86238	0.00420475	0.0367052
ENSG00000147676	MAL2	3877.76	-1.61637	0.186461	-8.6687	4.3708e-18	2.4998e-15
ENSG00000039068	CDH1	2138.49	-1.6248	0.226907	-7.16065	8.02957e-13	1.77571e-10
ENSG00000067601	PMS2P4	49.8307	-1.63086	0.596743	-2.73295	0.00627706	0.0483789
ENSG00000067048	DDX3Y	127.249	-1.64117	0.435195	-3.77112	0.000162514	0.00320506
ENSG00000154764	WNT7A	32.7981	-1.66179	0.662647	-2.50781	0.0121483	0.0779166
ENSG00000143333	RGS16	229.893	-1.66263	0.31276	-5.316	1.06072e-07	7.00923e-06
ENSG00000081923	ATP8B1	489.953	-1.66427	0.248106	-6.70791	1.97427e-11	3.32245e-09
ENSG00000146955	RAB19	34.5695	-1.66508	0.638189	-2.60907	0.00907892	0.0633767
ENSG00000143217	NECTIN4	48.0703	-1.66657	0.569364	-2.92706	0.00342179	0.03232
ENSG00000157168	NRG1	47.8739	-1.67514	0.584223	-2.86729	0.00414001	0.036447
ENSG00000163053	SLC16A14	473.691	-1.71955	0.24482	-7.02373	2.16024e-12	4.11837e-10
ENSG00000064270	ATP2C2	383.237	-1.78316	0.719569	-2.47809	0.0132087	0.0828277
ENSG00000277232	GTSE1-DT	26.7229	-1.86304	0.744925	-2.50098	0.0123849	0.0788981
ENSG00000167355	OR51B5	1057.61	-1.86714	0.24444	-7.63842	2.19908e-14	6.75444e-12
ENSG00000197191	CYSRT1	298.681	-1.87912	0.271661	-6.91715	4.60817e-12	8.68534e-10
ENSG00000138271	GPR87	51.9662	-1.9265	0.548427	-3.51278	0.000443452	0.00690619
ENSG00000167754	KLK5	71.7299	-1.99353	0.484895	-4.11126	3.93513e-05	0.00101669
ENSG00000115339	GALNT3	265.629	-1.99964	0.331313	-6.0355	1.58474e-09	1.71795e-07
ENSG00000112297	CRYBG1	705.202	-2.01677	0.285719	-7.05857	1.6823e-12	3.44476e-10
ENSG00000239127	SNORD125	35.4391	-2.03608	0.610596	-3.33459	0.000854264	0.0113441
ENSG00000237452	MEIOSIN	182.295	-2.03949	0.331049	-6.16069	7.24294e-10	8.70517e-08
ENSG00000135480	KRT7	1139.88	-2.10021	0.2932	-7.16306	7.88946e-13	1.76831e-10
ENSG00000236824	BCYRN1	56.4453	-2.12236	0.53775	-3.94674	7.92238e-05	0.00178306
ENSG00000183914	DNAH2	98.0476	-2.18302	0.398318	-5.4806	4.23875e-08	3.1389e-06
ENSG00000253313	C1orf210	150.885	-2.22596	0.362389	-6.14245	8.12566e-10	9.55831e-08
ENSG00000129354	AP1M2	4494.36	-2.22769	0.216342	-10.2971	7.26313e-25	1.00389e-21
ENSG00000213937	CLDN9	39.6826	-2.23138	0.628951	-3.54777	0.000388503	0.00624391
ENSG00000231466		14.9382	-2.23946	0.929904	-2.40827	0.0160281	0.0943248
ENSG00000258130		24.3428	-2.27444	0.802252	-2.83507	0.00458162	0.0388303
ENSG00000233198	RNF224	30.93	-2.34551	0.7066	-3.31944	0.000901995	0.0117799
ENSG00000101443	WFDC2	26.2379	-2.39513	0.833976	-2.87194	0.0040796	0.0361088
ENSG00000012817	KDM5D	86.8072	-2.60041	0.514922	-5.05011	4.4155e-07	2.49951e-05
ENSG00000198692	EIF1AY	64.6187	-2.6061	0.566326	-4.60176	4.18938e-06	0.00016989
ENSG00000181798	LINC00471	18.2957	-2.61667	0.908447	-2.88038	0.003972	0.0358155
ENSG00000272189		20.4097	-2.67111	0.914707	-2.92019	0.00349824	0.0328373
ENSG00000129654	FOXJ1	16.4001	-2.78546	0.966117	-2.88315	0.00393718	0.0355926
ENSG00000182774	RPS17	17.0732	-2.9053	1.04871	-2.77035	0.00559963	0.0447162
ENSG00000049283	EPN3	1657.13	-2.91522	0.219581	-13.2763	3.17817e-40	2.63565e-36
ENSG00000083307	GRHL2	937.787	-2.94715	0.603851	-4.8806	1.05765e-06	5.33198e-05
ENSG00000155066	PROM2	274.524	-3.00559	0.307197	-9.78392	1.31991e-22	1.56372e-19
ENSG00000130701	RBBP8NL	84.0021	-3.0096	0.533271	-5.64366	1.66474e-08	1.4381e-06
ENSG00000140835	CHST4	16.4045	-3.30504	0.992503	-3.33001	0.000868438	0.0114772
ENSG00000133424	LARGE1	68.604	-3.36539	0.544159	-6.18457	6.22708e-10	7.59429e-08
ENSG00000162576	MXRA8	10.9081	-3.62148	1.32	-2.74354	0.006078	0.047262
ENSG00000185847	LINC01405	126.351	-3.77282	0.403092	-9.35971	7.99585e-21	8.2887e-18
ENSG00000274173		37.6112	-3.89707	0.745975	-5.22413	1.74976e-07	1.10348e-05
ENSG00000067646	ZFY	11.0182	-3.92686	1.31239	-2.99215	0.00277017	0.0276783
ENSG00000111245	MYL2	24.7884	-4.67806	1.0117	-4.62397	3.76472e-06	0.000154943

## Sheet: HCT116_CD44v6_vs_Parental
Supplementary File 4. List of Differential Expressed Gene in HCT116 CD44v6 OE vs HCT116 parental
ensembl_gene_id	hgnc_symbol	baseMean	log2FoldChange	lfcSE	stat	pvalue	padj
ENSG00000134321	RSAD2	180.628	10.9315	2.46227	4.43959	9.01324e-06	0.000841886
ENSG00000132530	XAF1	96.91	10.3966	2.18783	4.75202	2.01396e-06	0.000243366
ENSG00000137959	IFI44L	61.2919	9.6941	2.05737	4.7119	2.45418e-06	0.000288492
ENSG00000255443	CD44-AS1	34.9585	9.14903	1.56536	5.84469	5.07504e-09	1.36768e-06
ENSG00000243649	CFB	102.699	9.08304	1.87083	4.85509	1.2033e-06	0.000162445
ENSG00000162654	GBP4	34.3426	8.44992	1.62024	5.21522	1.836e-07	3.27073e-05
ENSG00000137965	IFI44	689.236	8.30262	1.17255	7.08084	1.43286e-12	9.52302e-10
ENSG00000171855	IFNB1	31.3135	8.10669	1.63431	4.96031	7.03812e-07	0.000101349
ENSG00000133321	PLAAT4	117.972	8.08642	1.48427	5.44808	5.09169e-08	1.04743e-05
ENSG00000197110	IFNL3	981.984	7.62339	1.32044	5.77336	7.77078e-09	2.00417e-06
ENSG00000011590	ZBTB32	70.6909	7.26934	1.15158	6.31249	2.74574e-10	1.15699e-07
ENSG00000169245	CXCL10	61.4932	7.19006	1.15404	6.23035	4.65407e-10	1.78129e-07
ENSG00000116701	NCF2	70.4691	6.98824	1.14718	6.09166	1.11747e-09	3.52561e-07
ENSG00000154451	GBP5	10.2775	6.9758	1.7901	3.89688	9.74384e-05	0.0064759
ENSG00000117228	GBP1	25.8439	6.96461	1.67168	4.16623	3.09676e-05	0.00238893
ENSG00000183709	IFNL2	714.288	6.90351	2.13221	3.23773	0.00120485	0.0481941
ENSG00000128284	APOL3	90.4959	6.80678	1.44337	4.7159	2.40645e-06	0.000284819
ENSG00000177409	SAMD9L	42.7158	6.76408	1.1736	5.76354	8.23655e-09	2.06272e-06
ENSG00000168421	RHOH	8.42936	6.48562	1.921	3.37617	0.000735035	0.0331328
ENSG00000271503	CCL5	1699.1	6.45096	2.14888	3.00201	0.00268203	0.0870916
ENSG00000110446	SLC15A3	52.0388	6.38223	1.19375	5.34637	8.97349e-08	1.76207e-05
ENSG00000089127	OAS1	1495.22	6.32534	1.67384	3.77894	0.000157497	0.00948273
ENSG00000182393	IFNL1	1283.16	6.28514	1.51929	4.1369	3.52028e-05	0.00265635
ENSG00000165949	IFI27	2086.98	6.19005	1.55689	3.97591	7.01094e-05	0.00493396
ENSG00000279954		7.54022	6.14896	1.87923	3.27205	0.00106769	0.044138
ENSG00000152583	SPARCL1	11.5782	5.98274	1.75571	3.4076	0.000655376	0.0306552
ENSG00000119922	IFIT2	2554.06	5.97596	0.874533	6.83331	8.29752e-12	5.24204e-09
ENSG00000169248	CXCL11	25.1204	5.73924	1.27808	4.49053	7.10456e-06	0.000701525
ENSG00000128422	KRT17	387.447	5.68254	0.445878	12.7446	3.34023e-37	1.44298e-33
ENSG00000111335	OAS2	201.372	5.59308	1.43029	3.91045	9.21243e-05	0.00617019
ENSG00000115009	CCL20	19.4188	5.51556	1.26962	4.34425	1.39751e-05	0.00122584
ENSG00000182050	MGAT4C	38.4564	5.39334	1.60009	3.37066	0.000749895	0.0334837
ENSG00000188282	RUFY4	26.5449	5.35436	1.11338	4.80911	1.51605e-06	0.000195503
ENSG00000119917	IFIT3	2248.16	5.34349	0.664587	8.04032	8.96044e-16	9.67727e-13
ENSG00000023445	BIRC3	701.719	5.34091	0.341284	15.6495	3.35082e-55	2.89511e-51
ENSG00000049249	TNFRSF9	76.2623	5.30228	1.28934	4.11239	3.91583e-05	0.00292248
ENSG00000185745	IFIT1	6891.6	5.23853	0.883266	5.93087	3.01342e-09	8.3987e-07
ENSG00000130303	BST2	1071.99	5.20223	1.17887	4.41289	1.01999e-05	0.000927653
ENSG00000162645	GBP2	53.8722	5.13984	0.763189	6.7347	1.64274e-11	9.46216e-09
ENSG00000185885	IFITM1	1556.88	5.10276	1.54759	3.29722	0.000976453	0.0411539
ENSG00000121858	TNFSF10	14.8802	5.06956	1.33934	3.78512	0.000153637	0.00928266
ENSG00000100342	APOL1	103.796	4.9876	0.666835	7.47951	7.46025e-14	5.60492e-11
ENSG00000135114	OASL	8554.72	4.98038	1.04188	4.7802	1.75123e-06	0.000219284
ENSG00000163739	CXCL1	427.629	4.97657	0.95328	5.22047	1.78473e-07	3.24632e-05
ENSG00000261040	WFDC21P	16.3068	4.87252	1.36022	3.58214	0.000340788	0.0185478
ENSG00000169429	CXCL8	244.017	4.81289	0.442109	10.8862	1.34101e-27	4.63454e-24
ENSG00000221963	APOL6	167.834	4.76324	1.25246	3.80311	0.000142892	0.00872498
ENSG00000126709	IFI6	8804.54	4.55377	1.22698	3.71137	0.000206139	0.0119533
ENSG00000178685	PARP10	1039.15	4.5366	1.04555	4.33898	1.43148e-05	0.00124301
ENSG00000108771	DHX58	880.171	4.44584	1.06916	4.15825	3.2069e-05	0.0024629
ENSG00000214402	LCNL1	12.0012	4.42394	1.4018	3.15591	0.00159997	0.0590253
ENSG00000180176	TH	16.0117	4.31764	1.1809	3.65624	0.000255944	0.0145484
ENSG00000139192	TAPBPL	31.7197	4.16075	0.870313	4.78075	1.74641e-06	0.000219284
ENSG00000283525		29.1366	4.12981	0.890759	4.63628	3.54742e-06	0.000398048
ENSG00000107201	DDX58	2708.66	4.03169	0.516221	7.81	5.71864e-15	5.48989e-12
ENSG00000226145	KRT16P6	46.3883	3.88174	0.694785	5.58697	2.31062e-08	5.05412e-06
ENSG00000205413	SAMD9	1297.1	3.87929	0.226712	17.1111	1.22658e-65	2.11953e-61
ENSG00000138646	HERC5	3615.61	3.87463	0.733338	5.28355	1.26702e-07	2.3798e-05
ENSG00000146859	TMEM140	16.8269	3.86161	1.21703	3.17297	0.0015089	0.0564967
ENSG00000137628	DDX60	828.397	3.79025	0.255014	14.8629	5.73575e-50	3.30379e-46
ENSG00000273445		22.5736	3.65743	0.991029	3.69053	0.000223785	0.0128046
ENSG00000287315		16.7566	3.65451	1.07833	3.38906	0.000701325	0.0318918
ENSG00000115267	IFIH1	1700.82	3.6458	0.812873	4.48508	7.2885e-06	0.000714213
ENSG00000111181	SLC6A12	14.6408	3.53505	1.09692	3.22271	0.00126985	0.0499227
ENSG00000262903		29.2819	3.51356	0.883843	3.97532	7.02839e-05	0.00493396
ENSG00000168016	TRANK1	354.748	3.43965	1.01206	3.39867	0.000677136	0.0312024
ENSG00000253931		60.4743	3.41996	0.608298	5.62218	1.88564e-08	4.23168e-06
ENSG00000164530	PI16	19.971	3.4008	1.01013	3.36669	0.000760771	0.0337012
ENSG00000172554	SNTG2	30.871	3.34161	0.755228	4.42464	9.6603e-06	0.000892673
ENSG00000155918	RAET1L	284.242	3.31861	0.412624	8.04269	8.78897e-16	9.67727e-13
ENSG00000015413	DPEP1	1156.75	3.27833	0.733585	4.46892	7.86162e-06	0.000763195
ENSG00000133106	EPSTI1	84.0213	3.24758	0.68104	4.76855	1.85553e-06	0.000229026
ENSG00000144230	GPR17	20.3117	3.22471	1.02863	3.13496	0.00171878	0.0618759
ENSG00000168961	LGALS9	183.591	3.19789	0.423337	7.554	4.22087e-14	3.47317e-11
ENSG00000287782		20.1748	3.17963	0.944622	3.36604	0.000762567	0.0337012
ENSG00000181143	MUC16	84.0106	3.14404	0.510638	6.15709	7.40942e-10	2.46221e-07
ENSG00000172183	ISG20	1344.41	3.13355	0.641079	4.88793	1.01902e-06	0.000138651
ENSG00000187608	ISG15	34688.8	3.13207	0.630073	4.97096	6.66214e-07	9.75608e-05
ENSG00000155657	TTN	64.8552	3.11139	0.539455	5.76765	8.0384e-09	2.0427e-06
ENSG00000182179	UBA7	108.125	3.09558	0.467354	6.62364	3.50463e-11	1.8925e-08
ENSG00000250508	LINC02701	22.9864	3.08026	0.879769	3.50121	0.000463147	0.0234011
ENSG00000118503	TNFAIP3	679.571	3.04811	0.33402	9.12554	7.13767e-20	1.76199e-16
ENSG00000255026		21.1901	3.0431	0.919073	3.31105	0.000929463	0.0394137
ENSG00000205312	KRT17P4	15.9499	3.04122	0.996658	3.05142	0.0022776	0.0770194
ENSG00000079385	CEACAM1	295.553	3.0357	0.327851	9.25937	2.05642e-20	5.92248e-17
ENSG00000168542	COL3A1	255.11	2.98159	0.577678	5.16133	2.45197e-07	4.23701e-05
ENSG00000111859	NEDD9	35.0436	2.96079	0.920563	3.21629	0.00129861	0.0507693
ENSG00000153902	LGI4	29.6032	2.94322	0.764286	3.85095	0.000117662	0.00744761
ENSG00000198758	EPS8L3	140.098	2.9322	0.470853	6.22742	4.74186e-10	1.78129e-07
ENSG00000125730	C3	174.014	2.92996	0.453059	6.46707	9.99243e-11	4.93341e-08
ENSG00000207870	MIR221	40.5608	2.90471	0.653998	4.44147	8.93445e-06	0.000841287
ENSG00000189001	SBSN	30.4919	2.90268	0.761476	3.8119	0.0001379	0.00851041
ENSG00000242866	STRC	16.7782	2.88252	0.939878	3.06691	0.00216287	0.0735717
ENSG00000140678	ITGAX	159.954	2.82953	0.444984	6.35871	2.03451e-10	9.25169e-08
ENSG00000262223		23.4707	2.81866	0.905139	3.11407	0.00184526	0.0653402
ENSG00000117152	RGS4	111.085	2.76974	0.458473	6.04123	1.52942e-09	4.55662e-07
ENSG00000059728	MXD1	475.545	2.76743	0.327633	8.44672	2.99607e-17	4.70656e-14
ENSG00000081041	CXCL2	89.9563	2.7141	0.511434	5.30685	1.11538e-07	2.11799e-05
ENSG00000107159	CA9	53.1803	2.70762	0.596058	4.54255	5.55778e-06	0.0005856
ENSG00000125845	BMP2	24.5818	2.69977	0.865164	3.12053	0.00180524	0.064585
ENSG00000259341		24.0344	2.68047	0.806126	3.32512	0.000883803	0.0382028
ENSG00000164308	ERAP2	76.8307	2.67804	0.474006	5.64981	1.60623e-08	3.75077e-06
ENSG00000128482	RNF112	26.9616	2.66504	0.732594	3.63782	0.000274959	0.0154262
ENSG00000144802	NFKBIZ	347.364	2.64502	0.321145	8.23622	1.77737e-16	2.36253e-13
ENSG00000019549	SNAI2	78.7105	2.63333	0.493213	5.33914	9.33895e-08	1.81323e-05
ENSG00000254815	LMNTD2-AS1	149.559	2.61526	0.432658	6.04464	1.49741e-09	4.53953e-07
ENSG00000105499	PLA2G4C	273.288	2.6143	0.412765	6.33363	2.39453e-10	1.0486e-07
ENSG00000181126	HLA-V	20.8971	2.60484	0.820576	3.1744	0.00150144	0.0564967
ENSG00000146592	CREB5	77.4665	2.58816	0.609257	4.24806	2.1563e-05	0.00177433
ENSG00000153993	SEMA3D	79.8883	2.56458	0.55611	4.61164	3.995e-06	0.000442523
ENSG00000164136	IL15	69.7508	2.55657	0.527941	4.84254	1.28188e-06	0.000171713
ENSG00000133246	PRAM1	33.4911	2.545	0.714926	3.55981	0.000371124	0.0198545
ENSG00000173762	CD7	29.7936	2.51282	0.805662	3.11895	0.00181495	0.0646091
ENSG00000138496	PARP9	1336.78	2.50234	0.752595	3.32496	0.000884325	0.0382028
ENSG00000129946	SHC2	243.806	2.48462	0.363782	6.82996	8.49404e-12	5.24204e-09
ENSG00000119508	NR4A3	57.7483	2.47048	0.669111	3.69219	0.000222335	0.0127639
ENSG00000269954		22.4505	2.46646	0.821792	3.00132	0.00268811	0.0870916
ENSG00000163216	SPRR2D	97.1317	2.45826	0.643715	3.81886	0.000134068	0.00830356
ENSG00000256128	LINC00944	82.5672	2.44924	0.537871	4.55358	5.27414e-06	0.000559124
ENSG00000229124	VIM-AS1	55.9283	2.43854	0.752761	3.23947	0.00119753	0.0480125
ENSG00000229474	PATL2	26.3896	2.3939	0.790515	3.02828	0.00245949	0.0814174
ENSG00000238178		243.637	2.34143	0.34624	6.76246	1.35669e-11	8.08402e-09
ENSG00000258875		29.4123	2.33139	0.735522	3.16971	0.00152592	0.0568273
ENSG00000164342	TLR3	81.552	2.25864	0.449375	5.02617	5.00364e-07	7.65159e-05
ENSG00000124140	SLC12A5	49.3476	2.23847	0.676346	3.30966	0.000934109	0.0394655
ENSG00000157601	MX1	118.483	2.22863	0.530604	4.20018	2.667e-05	0.00212376
ENSG00000213366	GSTM2	45.7874	2.18414	0.669062	3.26449	0.00109663	0.0450651
ENSG00000072182	ASIC4	71.8055	2.16844	0.493143	4.39717	1.0967e-05	0.000987029
ENSG00000138685	FGF2	423.889	2.15834	0.267941	8.05528	7.92988e-16	9.67727e-13
ENSG00000230795	HLA-K	44.5698	2.13088	0.608059	3.5044	0.000457643	0.0233634
ENSG00000129538	RNASE1	119.678	2.10258	0.42716	4.92224	8.55582e-07	0.000122186
ENSG00000135318	NT5E	6119.63	2.10253	0.254715	8.25444	1.5261e-16	2.19759e-13
ENSG00000186832	KRT16	53.2549	2.09669	0.575666	3.64221	0.000270309	0.0152148
ENSG00000114771	AADAC	121.516	2.05922	0.42909	4.79904	1.59425e-06	0.000202563
ENSG00000105939	ZC3HAV1	5341.28	2.04444	0.598231	3.41747	0.000632058	0.0299232
ENSG00000099338	CATSPERG	41.9466	2.04323	0.5997	3.40709	0.0006566	0.0306552
ENSG00000088340	FER1L4	315.662	2.03238	0.334172	6.08182	1.18824e-09	3.66657e-07
ENSG00000112139	MDGA1	757.455	2.02626	0.257987	7.85411	4.02607e-15	4.09238e-12
ENSG00000026652	AGPAT4	827.939	2.00312	0.25891	7.73675	1.01986e-14	9.27539e-12
ENSG00000171236	LRG1	91.7583	1.98568	0.606775	3.27251	0.00106598	0.044138
ENSG00000114270	COL7A1	442.933	1.98487	0.319677	6.20898	5.33309e-10	1.91991e-07
ENSG00000107611	CUBN	108.16	1.97973	0.414344	4.77799	1.77057e-06	0.000220111
ENSG00000056558	TRAF1	207.119	1.97423	0.315171	6.26401	3.7521e-10	1.47355e-07
ENSG00000135604	STX11	125.086	1.95641	0.432333	4.52524	6.03266e-06	0.000620502
ENSG00000147041	SYTL5	86.8736	1.95182	0.631155	3.09246	0.00198502	0.0691555
ENSG00000163354	DCST2	86.5604	1.92983	0.442565	4.36056	1.2973e-05	0.00114374
ENSG00000107968	MAP3K8	180.526	1.91828	0.32425	5.91605	3.29758e-09	9.0448e-07
ENSG00000165507	DEPP1	292.815	1.89656	0.286085	6.62934	3.37195e-11	1.87959e-08
ENSG00000266714	MYO15B	1354.75	1.893	0.538421	3.51584	0.000438367	0.0226796
ENSG00000111700	SLCO1B3	41.6983	1.88879	0.580996	3.25095	0.00115021	0.0464385
ENSG00000099250	NRP1	307.598	1.85583	0.304685	6.09099	1.12216e-09	3.52561e-07
ENSG00000172638	EFEMP2	91.9641	1.85114	0.478275	3.87045	0.000108634	0.0071376
ENSG00000197558	SSPOP	127.812	1.8441	0.38291	4.81602	1.46452e-06	0.000193183
ENSG00000124116	WFDC3	80.2698	1.83597	0.479947	3.82537	0.000130575	0.00815097
ENSG00000158815	FGF17	82.5177	1.82299	0.461674	3.94865	7.85925e-05	0.00541067
ENSG00000197635	DPP4	593.731	1.81837	0.213821	8.50416	1.82918e-17	3.16083e-14
ENSG00000120217	CD274	113.029	1.8181	0.464852	3.91113	9.18647e-05	0.00617019
ENSG00000065618	COL17A1	391.927	1.80688	0.281327	6.42271	1.33872e-10	6.42583e-08
ENSG00000167617	CDC42EP5	118.661	1.79971	0.482141	3.73276	0.000189395	0.011208
ENSG00000132386	SERPINF1	119.204	1.79503	0.457018	3.92771	8.57589e-05	0.00583431
ENSG00000248323	LUCAT1	85.3091	1.79301	0.42449	4.22392	2.40088e-05	0.00195694
ENSG00000112769	LAMA4	67.9961	1.78646	0.586722	3.04482	0.00232817	0.078118
ENSG00000186007	LEMD1	131.597	1.77188	0.419243	4.22639	2.3747e-05	0.00194478
ENSG00000179954	SSC5D	63.2012	1.75744	0.489165	3.59273	0.000327236	0.0180659
ENSG00000158055	GRHL3	115.651	1.74844	0.456545	3.82972	0.000128289	0.00806123
ENSG00000106366	SERPINE1	2625.42	1.74196	0.534684	3.25793	0.00112227	0.0459547
ENSG00000138642	HERC6	543.077	1.72728	0.347381	4.97229	6.61667e-07	9.75608e-05
ENSG00000011422	PLAUR	6363.36	1.71316	0.491951	3.48237	0.000496987	0.024537
ENSG00000214595	EML6	228.977	1.69737	0.329513	5.15116	2.58883e-07	4.42921e-05
ENSG00000100918	REC8	157.589	1.69306	0.405531	4.17492	2.98091e-05	0.00232028
ENSG00000197249	SERPINA1	528.316	1.69104	0.324152	5.21682	1.82023e-07	3.27073e-05
ENSG00000091879	ANGPT2	288.566	1.67244	0.347755	4.80925	1.51497e-06	0.000195503
ENSG00000130066	SAT1	17064.6	1.66499	0.547422	3.04152	0.0023539	0.0786759
ENSG00000163072	NOSTRIN	54.9569	1.65859	0.53611	3.09374	0.00197649	0.0689974
ENSG00000163644	PPM1K	164.024	1.64689	0.354571	4.64475	3.40491e-06	0.000384555
ENSG00000060566	CREB3L3	187.721	1.63878	0.334828	4.89438	9.86143e-07	0.000136324
ENSG00000143387	CTSK	69.4766	1.63849	0.503413	3.25476	0.00113489	0.0462522
ENSG00000162520	SYNC	82.9736	1.62764	0.446452	3.64573	0.000266629	0.0150567
ENSG00000213928	IRF9	59.8721	1.62295	0.517612	3.13546	0.00171588	0.0618759
ENSG00000164483	SAMD3	184.095	1.62071	0.330233	4.90778	9.21126e-07	0.000128363
ENSG00000068079	IFI35	1621.35	1.61342	0.517681	3.11664	0.00182926	0.0649066
ENSG00000087085	ACHE	273.247	1.61298	0.281083	5.73844	9.55531e-09	2.32557e-06
ENSG00000143248	RGS5	402.987	1.60877	0.282907	5.68657	1.29617e-08	3.06818e-06
ENSG00000164484	TMEM200A	1843.42	1.59869	0.176761	9.04439	1.50503e-19	3.25087e-16
ENSG00000222009	BTBD19	166.651	1.59797	0.390517	4.09194	4.27788e-05	0.00317261
ENSG00000173193	PARP14	1171.51	1.59793	0.259114	6.16691	6.96353e-10	2.4066e-07
ENSG00000196159	FAT4	94.5764	1.59209	0.400848	3.97182	7.13269e-05	0.00496988
ENSG00000167772	ANGPTL4	945.243	1.58928	0.292269	5.43772	5.3967e-08	1.08436e-05
ENSG00000176532	PRR15	531.407	1.5753	0.293277	5.37137	7.81413e-08	1.55205e-05
ENSG00000142606	MMEL1	129.3	1.57061	0.395983	3.96636	7.29775e-05	0.0050442
ENSG00000186594	MIR22HG	195.772	1.56666	0.329201	4.75897	1.94585e-06	0.000236791
ENSG00000163734	CXCL3	94.9976	1.5664	0.438221	3.57446	0.000350954	0.0189515
ENSG00000109511	ANXA10	566.129	1.5616	0.295916	5.27718	1.31188e-07	2.43757e-05
ENSG00000270069	MIR222HG	280.138	1.55589	0.364356	4.27024	1.95263e-05	0.00163793
ENSG00000244560		83.2431	1.54057	0.496062	3.1056	0.00189891	0.0665581
ENSG00000141682	PMAIP1	2516.29	1.50893	0.176296	8.55904	1.13808e-17	2.1851e-14
ENSG00000010310	GIPR	248.701	1.50167	0.389436	3.856	0.000115259	0.00734934
ENSG00000186081	KRT5	59.2348	-2.23283	0.60113	-3.71439	0.000203695	0.0118513
ENSG00000131002	TXLNGY	45.5095	-2.91297	0.638996	-4.55867	5.14785e-06	0.000552515
ENSG00000012817	KDM5D	86.8072	-3.06749	0.525037	-5.84243	5.14462e-09	1.36768e-06
ENSG00000067048	DDX3Y	127.249	-3.50794	0.468829	-7.48235	7.30062e-14	5.60492e-11
ENSG00000183878	UTY	25.1742	-3.85585	1.03639	-3.72045	0.000198869	0.011649
ENSG00000198692	EIF1AY	64.6187	-3.87502	0.612018	-6.33154	2.42731e-10	1.0486e-07
ENSG00000154856	APCDD1	14.9891	-4.57214	1.34346	-3.40325	0.000665894	0.0308489
ENSG00000176728	TTTY14	9.1639	-4.60213	1.49532	-3.07769	0.00208612	0.0718914
ENSG00000129824	RPS4Y1	416.248	-4.71235	1.24281	-3.79168	0.000149631	0.00907238
ENSG00000067646	ZFY	11.0182	-4.95986	1.49634	-3.31467	0.000917527	0.0392447
ENSG00000169562	GJB1	12.067	-6.86032	1.77783	-3.85882	0.000113936	0.00734632
