# Supplementary material for: Alternative splicing downstream of EMT enhances phenotypic plasticity and malignant behavior in colon cancer
Source: eLife. 2022 Nov 8;11:e82006. doi: 10.7554/eLife.82006 (PMC9674345; doi:10.7554/eLife.82006)
Supplement: Supplementary file 5. [file elife-82006-supp5.xlsx]

## Sheet: SW480_CD44s_vs_CD44v6
Supplementary File 5. List of Differential Expressed Gene in SW480 CD44s OE vs SW480 CD44v6 OE
ensembl_gene_id	hgnc_symbol	baseMean	log2FoldChange	lfcSE	stat	pvalue	padj
ENSG00000140937	CDH11	206.686	6.2231	1.14135	5.45241	4.96913e-08	7.14612e-06
ENSG00000150551	LYPD1	38.2174	5.75726	1.29432	4.44811	8.66285e-06	0.000701523
ENSG00000245311	ARNTL2-AS1	443.034	5.14073	0.709553	7.24503	4.32356e-13	1.80314e-10
ENSG00000170166	HOXD4	12.8158	4.97321	1.40873	3.53029	0.000415103	0.0180803
ENSG00000099260	PALMD	20.8745	4.93035	1.08443	4.5465	5.45454e-06	0.000464248
ENSG00000257345	LINC02413	15.4954	4.70186	1.189	3.95446	7.67088e-05	0.00453779
ENSG00000228395		13.8572	4.54901	1.35816	3.34938	0.000809926	0.0302264
ENSG00000079215	SLC1A3	1423.56	4.20608	1.22097	3.44488	0.000571313	0.023169
ENSG00000261092	LINC02178	209.728	4.17154	0.454392	9.18049	4.29118e-20	3.97697e-17
ENSG00000083067	TRPM3	48.1889	4.04592	0.648554	6.23838	4.42127e-10	9.57866e-08
ENSG00000176928	GCNT4	15.408	3.91026	1.14726	3.40834	0.000653599	0.0258987
ENSG00000165685	TMEM52B	66.1756	3.74536	0.593605	6.30951	2.79919e-10	6.39674e-08
ENSG00000198796	ALPK2	18.2946	3.55859	0.953567	3.73188	0.000190059	0.00954991
ENSG00000145721	LIX1	93.8922	3.5353	0.492104	7.18405	6.76768e-13	2.50886e-10
ENSG00000152931	PART1	29.3947	3.51457	0.814118	4.31703	1.58144e-05	0.00116733
ENSG00000112541	PDE10A	55.9162	3.28055	0.593939	5.52338	3.32539e-08	4.86616e-06
ENSG00000228162		15.4644	3.03447	1.01989	2.9753	0.00292706	0.07863
ENSG00000237380	HOXD-AS2	61.3377	3.02441	0.547074	5.52834	3.23276e-08	4.77246e-06
ENSG00000104447	TRPS1	15.6976	3.01117	0.951208	3.16563	0.00154749	0.0487079
ENSG00000144644	GADL1	18.3921	2.94213	0.878573	3.34875	0.000811759	0.0302272
ENSG00000165181	SHOC1	46.5123	2.82901	0.565752	5.00045	5.71975e-07	6.44709e-05
ENSG00000186469	GNG2	51.811	2.74238	0.661251	4.14727	3.36465e-05	0.0022098
ENSG00000197594	ENPP1	38.0924	2.6784	0.726652	3.68595	0.000227854	0.0111796
ENSG00000164283	ESM1	53.3572	2.66196	0.567979	4.68673	2.776e-06	0.000254447
ENSG00000066382	MPPED2	59.7767	2.50887	0.662106	3.78923	0.000151114	0.00778049
ENSG00000163364	LINC01116	60.7121	2.50856	0.515035	4.87067	1.11219e-06	0.000113826
ENSG00000154027	AK5	272.651	2.4849	0.842064	2.95096	0.00316788	0.0828315
ENSG00000182463	TSHZ2	127.279	2.46502	0.419862	5.87103	4.33099e-09	7.60522e-07
ENSG00000284740		49.0769	2.45404	0.555394	4.41856	9.936e-06	0.00078185
ENSG00000127920	GNG11	1449.93	2.44793	0.292199	8.37763	5.40028e-17	3.6035e-14
ENSG00000131634	TMEM204	280.352	2.3381	0.337772	6.92213	4.44904e-12	1.48438e-09
ENSG00000066230	SLC9A3	1990.28	2.32959	0.222253	10.4817	1.04826e-25	1.94302e-22
ENSG00000257037	RARS1P1	60.8738	2.28731	0.542556	4.21579	2.48902e-05	0.00170171
ENSG00000133116	KL	63.1838	2.28565	0.505702	4.51975	6.19135e-06	0.000519015
ENSG00000107242	PIP5K1B	220.225	2.25763	0.380078	5.93992	2.85164e-09	5.06075e-07
ENSG00000166025	AMOTL1	71.9577	2.23973	0.57111	3.92171	8.7922e-05	0.00507514
ENSG00000141448	GATA6	51.0693	2.21663	0.523152	4.23707	2.26459e-05	0.00157408
ENSG00000172551	MUCL1	626.974	2.21496	0.306467	7.2274	4.92331e-13	2.00319e-10
ENSG00000117600	PLPPR4	157.456	2.15762	0.45721	4.71911	2.3688e-06	0.000218322
ENSG00000138449	SLC40A1	54.2216	2.15141	0.507507	4.23917	2.24346e-05	0.00156592
ENSG00000135373	EHF	816.625	2.13261	0.263387	8.09687	5.63894e-16	3.48403e-13
ENSG00000099998	GGT5	67.7505	2.00104	0.598505	3.3434	0.000827578	0.0305435
ENSG00000102287	GABRE	45.5347	1.99632	0.668166	2.98776	0.00281027	0.0763534
ENSG00000198795	ZNF521	93.0933	1.98494	0.450468	4.4064	1.05101e-05	0.000823146
ENSG00000163453	IGFBP7	3052.84	1.96453	0.272744	7.20284	5.89731e-13	2.23588e-10
ENSG00000107105	ELAVL2	71.1028	1.94499	0.485542	4.00581	6.18054e-05	0.00374923
ENSG00000227992		36.2283	1.92544	0.6236	3.08763	0.00201761	0.0594659
ENSG00000119125	GDA	444.203	1.87824	0.314356	5.97488	2.30258e-09	4.13029e-07
ENSG00000114948	ADAM23	96.3191	1.84676	0.398244	4.63725	3.53074e-06	0.000314168
ENSG00000081248	CACNA1S	94.8007	1.83623	0.432685	4.2438	2.19769e-05	0.00154657
ENSG00000092969	TGFB2	70.5186	1.78855	0.591053	3.02604	0.00247783	0.0699412
ENSG00000256977	LIMS3	56.9853	1.73403	0.584242	2.968	0.00299748	0.0796242
ENSG00000145569	OTULINL	274.063	1.69137	0.323002	5.23642	1.63717e-07	2.10087e-05
ENSG00000184785	SMIM10	1278.02	1.68855	0.25077	6.73345	1.65683e-11	5.21495e-09
ENSG00000137142	IGFBPL1	224.134	1.67775	0.391451	4.28597	1.81945e-05	0.00131394
ENSG00000249375	CASC11	114.803	1.67276	0.412905	4.05119	5.09571e-05	0.0031286
ENSG00000100385	IL2RB	178.156	1.64669	0.423269	3.89041	0.000100077	0.00556493
ENSG00000168386	FILIP1L	67.7839	1.62974	0.488743	3.33455	0.000854374	0.0312559
ENSG00000119900	OGFRL1	150.507	1.61756	0.485426	3.33224	0.000861487	0.0314471
ENSG00000175879	HOXD8	165.271	1.60042	0.323389	4.9489	7.46357e-07	8.19127e-05
ENSG00000172349	IL16	1824.48	1.5798	0.311928	5.06464	4.09169e-07	4.77326e-05
ENSG00000169442	CD52	79.9288	1.57149	0.48357	3.24977	0.00115499	0.0385351
ENSG00000188613	NANOS1	1244.89	1.56076	0.21775	7.16768	7.62766e-13	2.76619e-10
ENSG00000149557	FEZ1	228.717	1.54734	0.301723	5.12834	2.92302e-07	3.53346e-05
ENSG00000058335	RASGRF1	1468.4	1.54157	0.204029	7.55564	4.16798e-14	2.17282e-11
ENSG00000170523	KRT83	82.849	1.54074	0.534451	2.88285	0.003941	0.0978329
ENSG00000071909	MYO3B	226.118	1.53964	0.317202	4.85381	1.21111e-06	0.000122447
ENSG00000173698	ADGRG2	204.557	1.52232	0.430325	3.5376	0.000403787	0.0176797
ENSG00000114378	HYAL1	448.489	-1.50018	0.269259	-5.57152	2.52532e-08	3.82977e-06
ENSG00000267968		77.9986	-1.50352	0.472293	-3.18345	0.0014553	0.0463309
ENSG00000102575	ACP5	68.7693	-1.50355	0.469324	-3.20365	0.00135698	0.0438705
ENSG00000196878	LAMB3	2258.7	-1.50585	0.242698	-6.20462	5.483e-10	1.12923e-07
ENSG00000099812	MISP	4125.72	-1.50733	0.235417	-6.40281	1.52545e-10	3.915e-08
ENSG00000188112	C6orf132	1839.88	-1.51254	0.226661	-6.67312	2.50415e-11	7.20247e-09
ENSG00000154764	WNT7A	405.032	-1.51728	0.339021	-4.47548	7.62411e-06	0.000620417
ENSG00000054179	ENTPD2	443.521	-1.52373	0.30651	-4.97124	6.65255e-07	7.34952e-05
ENSG00000124467	PSG8	69.3608	-1.52993	0.449506	-3.40358	0.000665093	0.0262916
ENSG00000116983	HPCAL4	178.908	-1.53076	0.369574	-4.14195	3.44365e-05	0.00225282
ENSG00000135423	GLS2	1714.82	-1.53464	0.212786	-7.21213	5.50819e-13	2.1878e-10
ENSG00000130035	GALNT8	69.9115	-1.54223	0.466358	-3.30696	0.000943151	0.0334758
ENSG00000158769	F11R	350.674	-1.54275	0.249774	-6.17657	6.55077e-10	1.33268e-07
ENSG00000135472	FAIM2	160.779	-1.54849	0.340511	-4.54756	5.42721e-06	0.000464248
ENSG00000076770	MBNL3	135.595	-1.5558	0.42807	-3.63445	0.000278571	0.013202
ENSG00000235280	MCF2L-AS1	132.175	-1.55644	0.358611	-4.3402	1.42354e-05	0.00106971
ENSG00000128917	DLL4	51.5058	-1.55784	0.533699	-2.91895	0.00351217	0.0899002
ENSG00000183778	B3GALT5	360.235	-1.56382	0.404077	-3.8701	0.000108792	0.00592882
ENSG00000010030	ETV7	115.298	-1.56765	0.367767	-4.26261	2.02057e-05	0.00143435
ENSG00000179178	TMEM125	69.9468	-1.57224	0.45707	-3.43981	0.000582115	0.0234561
ENSG00000100298	APOBEC3H	76.9716	-1.58408	0.431952	-3.66725	0.000245169	0.0118893
ENSG00000041982	TNC	442.58	-1.58507	0.321213	-4.93463	8.03032e-07	8.5326e-05
ENSG00000186212	SOWAHB	102.318	-1.59754	0.432286	-3.69556	0.000219403	0.0108286
ENSG00000171219	CDC42BPG	1172.55	-1.59894	0.216395	-7.38897	1.47976e-13	7.05294e-11
ENSG00000183742	MACC1	112.228	-1.60654	0.478605	-3.35671	0.000788755	0.0298141
ENSG00000119866	BCL11A	195.14	-1.60695	0.335089	-4.7956	1.6219e-06	0.000157305
ENSG00000184012	TMPRSS2	76.5244	-1.61927	0.504271	-3.21111	0.00132225	0.0430817
ENSG00000149418	ST14	11532.6	-1.62639	0.176871	-9.19534	3.73805e-20	3.66813e-17
ENSG00000103534	TMC5	114.026	-1.63138	0.387618	-4.20873	2.56806e-05	0.00174148
ENSG00000117322	CR2	109.41	-1.64253	0.370679	-4.43114	9.37371e-06	0.000748193
ENSG00000282221		67.4779	-1.64258	0.466674	-3.51976	0.000431936	0.0185233
ENSG00000100593	ISM2	1046.13	-1.65131	0.2042	-8.08671	6.12992e-16	3.65212e-13
ENSG00000053747	LAMA3	1503.24	-1.65332	0.226762	-7.29098	3.07702e-13	1.38732e-10
ENSG00000123454	DBH	144.482	-1.6639	0.505351	-3.29256	0.000992811	0.0345763
ENSG00000116014	KISS1R	141.18	-1.66667	0.454864	-3.6641	0.00024821	0.0120018
ENSG00000139269	INHBE	272.693	-1.67056	0.42977	-3.88709	0.000101451	0.00562264
ENSG00000176490	DIRAS1	136.213	-1.69201	0.515592	-3.28168	0.0010319	0.0356401
ENSG00000138152	BTBD16	102.11	-1.70426	0.508352	-3.35252	0.000800794	0.0300875
ENSG00000189433	GJB4	88.5445	-1.70832	0.51049	-3.34644	0.000818574	0.030413
ENSG00000058085	LAMC2	1807.62	-1.70837	0.235133	-7.26554	3.71545e-13	1.6153e-10
ENSG00000075290	WNT8B	122.812	-1.71028	0.482859	-3.54199	0.000397118	0.0174335
ENSG00000119888	EPCAM	8352.51	-1.71509	0.185479	-9.24684	2.31237e-20	2.41094e-17
ENSG00000233760		58.9406	-1.71667	0.515264	-3.33163	0.000863395	0.0314479
ENSG00000182866	LCK	726.854	-1.71728	0.320641	-5.35576	8.5197e-08	1.15549e-05
ENSG00000258404	LINC02320	102.731	-1.72198	0.566775	-3.03821	0.00237991	0.0675198
ENSG00000006555	TTC22	85.5062	-1.72507	0.420413	-4.10327	4.07349e-05	0.0026036
ENSG00000183421	RIPK4	469.914	-1.72693	0.288542	-5.985	2.16385e-09	3.96674e-07
ENSG00000117595	IRF6	329.834	-1.72924	0.258912	-6.67888	2.40767e-11	7.04646e-09
ENSG00000171346	KRT15	214.626	-1.74798	0.31517	-5.54617	2.91997e-08	4.38837e-06
ENSG00000126583	PRKCG	60.7507	-1.75813	0.521771	-3.36954	0.000752938	0.0290601
ENSG00000124491	F13A1	42.5963	-1.7585	0.562879	-3.12411	0.00178343	0.0537997
ENSG00000111490	TBC1D30	117.549	-1.75904	0.421617	-4.17213	3.01769e-05	0.00200562
ENSG00000198719	DLL1	101.437	-1.75955	0.398087	-4.42003	9.86893e-06	0.000780254
ENSG00000184349	EFNA5	42.254	-1.76484	0.592503	-2.97861	0.00289557	0.0780353
ENSG00000136237	RAPGEF5	259.989	-1.76868	0.331449	-5.3362	9.49164e-08	1.26672e-05
ENSG00000111319	SCNN1A	1877	-1.78082	0.19735	-9.02367	1.81888e-19	1.51713e-16
ENSG00000206337	HCP5	210.676	-1.78711	0.369787	-4.8328	1.34623e-06	0.000134478
ENSG00000185924	RTN4RL1	132.372	-1.80383	0.417195	-4.32371	1.53424e-05	0.0011426
ENSG00000105289	TJP3	313.201	-1.80416	0.262734	-6.86688	6.56195e-12	2.1464e-09
ENSG00000081803	CADPS2	126.981	-1.8158	0.415121	-4.37415	1.21904e-05	0.000924366
ENSG00000131771	PPP1R1B	43.4884	-1.81935	0.583448	-3.11827	0.00181915	0.0545809
ENSG00000261183	SPINT1-AS1	315.513	-1.82043	0.281266	-6.47227	9.65417e-11	2.59759e-08
ENSG00000101443	WFDC2	1328.47	-1.84694	0.215236	-8.58102	9.40394e-18	6.82072e-15
ENSG00000196542	SPTSSB	240.334	-1.84769	0.430379	-4.29317	1.76142e-05	0.00128314
ENSG00000182568	SATB1	128.648	-1.86349	0.401855	-4.63722	3.53135e-06	0.000314168
ENSG00000151079	KCNA6	175.227	-1.87178	0.366886	-5.10179	3.36453e-07	4.00907e-05
ENSG00000065361	ERBB3	1918.24	-1.88892	0.224691	-8.40673	4.21598e-17	2.93045e-14
ENSG00000103089	FA2H	235.488	-1.89178	0.302161	-6.26084	3.82908e-10	8.5169e-08
ENSG00000117472	TSPAN1	565.281	-1.89837	0.327035	-5.80477	6.44533e-09	1.08607e-06
ENSG00000261150	EPPK1	320.323	-1.90388	0.312918	-6.08428	1.17016e-09	2.26501e-07
ENSG00000086506	HBQ1	95.09	-1.90557	0.457369	-4.16638	3.09473e-05	0.00204866
ENSG00000125850	OVOL2	306.189	-1.90721	0.262579	-7.26335	3.77632e-13	1.6153e-10
ENSG00000112297	CRYBG1	62.9224	-1.90889	0.485382	-3.93275	8.39794e-05	0.00489841
ENSG00000179148	ALOXE3	392.893	-1.91703	0.334142	-5.73718	9.62664e-09	1.55914e-06
ENSG00000127129	EDN2	58.2418	-1.93393	0.613585	-3.15185	0.0016224	0.0501203
ENSG00000182107	TMEM30B	121.066	-1.93412	0.405601	-4.76852	1.85583e-06	0.000175903
ENSG00000183960	KCNH8	85.9081	-1.95575	0.541555	-3.61137	0.000304583	0.0142726
ENSG00000166924	NYAP1	101.751	-1.95862	0.396595	-4.93858	7.86941e-07	8.52451e-05
ENSG00000204876		88.9933	-1.9605	0.490593	-3.99619	6.43691e-05	0.00387655
ENSG00000141738	GRB7	1386.88	-1.96326	0.307115	-6.39257	1.63119e-10	4.12297e-08
ENSG00000197587	DMBX1	92.2642	-1.9867	0.490428	-4.05094	5.10118e-05	0.0031286
ENSG00000185669	SNAI3	115.623	-1.99383	0.416314	-4.78924	1.6741e-06	0.00016143
ENSG00000187017	ESPN	2677.27	-2.00009	0.221015	-9.04955	1.43552e-19	1.26039e-16
ENSG00000143036	SLC44A3	28.6769	-2.00491	0.696383	-2.87903	0.00398896	0.0988763
ENSG00000174950	CD164L2	41.8712	-2.00683	0.617836	-3.24816	0.00116154	0.0386763
ENSG00000287315		79.5799	-2.01759	0.44771	-4.50648	6.59116e-06	0.000549769
ENSG00000126460	PRRG2	282.988	-2.02468	0.287885	-7.03294	2.02232e-12	6.88496e-10
ENSG00000215866	LINC01356	905.483	-2.03158	0.209072	-9.71713	2.54857e-22	3.27041e-19
ENSG00000163624	CDS1	328.575	-2.043	0.283593	-7.20401	5.84675e-13	2.23588e-10
ENSG00000231274	SBK3	105.557	-2.07158	0.578201	-3.5828	0.000339936	0.0155365
ENSG00000081479	LRP2	221.417	-2.08374	0.411757	-5.06059	4.17952e-07	4.84186e-05
ENSG00000019582	CD74	1149.82	-2.12265	0.247084	-8.5908	8.63665e-18	6.54893e-15
ENSG00000167608	TMC4	192.362	-2.14921	0.337479	-6.36842	1.90981e-10	4.75514e-08
ENSG00000240409	MTATP8P1	49.264	-2.17701	0.648121	-3.35895	0.000782382	0.0297714
ENSG00000183019	MCEMP1	37.6905	-2.20885	0.615324	-3.58973	0.000331018	0.0152122
ENSG00000146038	DCDC2	289.473	-2.21038	0.339619	-6.50843	7.59418e-11	2.11144e-08
ENSG00000112195	TREML2	1618.6	-2.21605	0.292265	-7.58234	3.39373e-14	1.82627e-11
ENSG00000287562		30.442	-2.23812	0.693153	-3.2289	0.00124269	0.0410505
ENSG00000135525	MAP7	1113.14	-2.26727	0.241486	-9.38882	6.06773e-21	7.23013e-18
ENSG00000236699	ARHGEF38	69.798	-2.27796	0.508347	-4.48111	7.42563e-06	0.000608854
ENSG00000261678	SCRT1	48.0797	-2.30171	0.53288	-4.31938	1.5647e-05	0.0011601
ENSG00000125730	C3	88.2642	-2.36425	0.515158	-4.58936	4.44602e-06	0.000388317
ENSG00000175707	KDF1	494.313	-2.38668	0.236637	-10.0858	6.38274e-24	1.06477e-20
ENSG00000088726	TMEM40	21.3997	-2.40939	0.796178	-3.0262	0.00247652	0.0699412
ENSG00000262152	LINC00514	96.7839	-2.42068	0.426975	-5.66937	1.43323e-08	2.21381e-06
ENSG00000219891	ZSCAN12P1	111.582	-2.42296	0.460329	-5.26355	1.41304e-07	1.82731e-05
ENSG00000151150	ANK3	103.67	-2.43593	0.448428	-5.43214	5.56816e-08	7.80572e-06
ENSG00000213937	CLDN9	170.479	-2.46378	0.396682	-6.21098	5.26563e-10	1.09802e-07
ENSG00000169116	PARM1	118.06	-2.479	0.495528	-5.00276	5.65166e-07	6.41367e-05
ENSG00000082438	COBLL1	144.187	-2.48905	0.482653	-5.157	2.50931e-07	3.12023e-05
ENSG00000237330	RNF223	130.19	-2.491	0.408445	-6.09873	1.06911e-09	2.09823e-07
ENSG00000110777	POU2AF1	29.9923	-2.49791	0.800979	-3.11857	0.00181729	0.0545809
ENSG00000164400	CSF2	52.9486	-2.5004	0.581143	-4.30255	1.68847e-05	0.00123669
ENSG00000140832	MARVELD3	262.551	-2.50946	0.312048	-8.0419	8.84532e-16	5.08819e-13
ENSG00000226145	KRT16P6	77.2028	-2.5242	0.494346	-5.10614	3.2881e-07	3.94619e-05
ENSG00000130545	CRB3	630.276	-2.52792	0.225566	-11.207	3.76654e-29	1.04722e-25
ENSG00000277200		26.8702	-2.53264	0.734373	-3.44871	0.000563263	0.022974
ENSG00000142515	KLK3	34.4955	-2.55149	0.653628	-3.90359	9.47781e-05	0.0053962
ENSG00000055118	KCNH2	853.891	-2.56576	0.335982	-7.63661	2.23009e-14	1.24008e-11
ENSG00000196684	HSH2D	117.816	-2.57001	0.446576	-5.75491	8.66891e-09	1.41779e-06
ENSG00000153093	ACOXL	49.156	-2.57033	0.578838	-4.4405	8.9749e-06	0.000723282
ENSG00000145103	ILDR1	283.27	-2.5838	0.276822	-9.33377	1.02167e-20	1.13623e-17
ENSG00000008323	PLEKHG6	97.8602	-2.58947	0.432899	-5.9817	2.20821e-09	4.00405e-07
ENSG00000150556	LYPD6B	269.592	-2.61541	0.35448	-7.37816	1.60496e-13	7.43721e-11
ENSG00000275234		108.382	-2.62335	0.391101	-6.70762	1.9782e-11	6.11116e-09
ENSG00000119411	BSPRY	561.897	-2.63518	0.266189	-9.89967	4.17654e-23	6.33391e-20
ENSG00000287778		19.2721	-2.657	0.858527	-3.09484	0.00196922	0.0582457
ENSG00000146904	EPHA1	541.558	-2.69575	0.239841	-11.2397	2.60192e-29	8.68104e-26
ENSG00000168875	SOX14	87.8138	-2.71576	0.466891	-5.81669	6.00245e-09	1.02176e-06
ENSG00000048052	HDAC9	22.9617	-2.72957	0.828044	-3.2964	0.00097931	0.0343697
ENSG00000135925	WNT10A	1173.27	-2.77122	0.243172	-11.3961	4.3715e-30	2.43084e-26
ENSG00000105550	FGF21	27.9466	-2.78188	0.76102	-3.65546	0.000256726	0.0123066
ENSG00000164690	SHH	235.004	-2.78476	0.441905	-6.30172	2.94352e-10	6.63564e-08
ENSG00000005001	PRSS22	562.077	-2.81291	0.324418	-8.67062	4.29773e-18	3.41404e-15
ENSG00000172478	MAB21L4	968.691	-2.82264	0.288415	-9.78673	1.28378e-22	1.78467e-19
ENSG00000168743	NPNT	56.6027	-2.8269	0.617347	-4.57911	4.66951e-06	0.00040153
ENSG00000115221	ITGB6	18.0986	-2.87755	0.955619	-3.01119	0.00260226	0.0719915
ENSG00000104413	ESRP1	1334.2	-2.92161	0.250771	-11.6505	2.28056e-31	1.90222e-27
ENSG00000181885	CLDN7	3778.92	-2.92641	0.241768	-12.1042	1.00348e-33	1.674e-29
ENSG00000162105	SHANK2	150.632	-2.93012	0.390471	-7.50406	6.18697e-14	3.12761e-11
ENSG00000062038	CDH3	1157.4	-2.93621	0.265387	-11.0639	1.87739e-28	3.91483e-25
ENSG00000204618	RNF39	37.5069	-2.93709	0.662372	-4.4342	9.24149e-06	0.000741186
ENSG00000104327	CALB1	35.3447	-2.96516	0.795086	-3.72936	0.000191967	0.00959899
ENSG00000144130	NT5DC4	404.414	-2.9685	0.263446	-11.2679	1.88941e-29	7.87979e-26
ENSG00000237412	PRSS56	190.791	-2.97448	0.467688	-6.35997	2.01793e-10	4.95046e-08
ENSG00000165125	TRPV6	48.8601	-2.98814	0.822911	-3.63118	0.000282123	0.0133325
ENSG00000140563	MCTP2	79.2584	-2.99739	0.48046	-6.23859	4.41529e-10	9.57866e-08
ENSG00000048740	CELF2	20.8883	-3.03272	0.91226	-3.3244	0.000886096	0.0319263
ENSG00000162069	BICDL2	133.848	-3.07001	0.412843	-7.43627	1.03571e-13	5.08166e-11
ENSG00000253313	C1orf210	78.0484	-3.08191	0.531795	-5.7953	6.81991e-09	1.1377e-06
ENSG00000064270	ATP2C2	71.7416	-3.11792	0.507091	-6.14865	7.8146e-10	1.55194e-07
ENSG00000147676	MAL2	1235.92	-3.14995	0.282666	-11.1437	7.68584e-29	1.83164e-25
ENSG00000039068	CDH1	358.741	-3.24342	0.843662	-3.84445	0.000120824	0.00646019
ENSG00000189280	GJB5	13.4691	-3.38303	1.06891	-3.16493	0.00155118	0.0487322
ENSG00000100170	SLC5A1	33.0998	-3.4656	0.724318	-4.78464	1.71298e-06	0.000164229
ENSG00000233930	KRTAP5-AS1	12.1787	-3.67901	1.23363	-2.98226	0.00286128	0.077236
ENSG00000171401	KRT13	2228.24	-3.82158	0.604178	-6.32526	2.52814e-10	6.02493e-08
ENSG00000203697	CAPN8	82.4013	-3.88931	0.552902	-7.03435	2.00185e-12	6.88496e-10
ENSG00000181126	HLA-V	16.1083	-3.99647	1.34555	-2.97014	0.00297666	0.0793025
ENSG00000164867	NOS3	1582.61	-4.01208	1.19539	-3.35629	0.000789943	0.0298141
ENSG00000121898	CPXM2	16.3597	-4.04305	1.33839	-3.02084	0.00252077	0.0705563
ENSG00000262823		44.7822	-4.08205	0.804751	-5.07244	3.92753e-07	4.61402e-05
ENSG00000167851	CD300A	71.5267	-4.16465	0.640461	-6.50258	7.89547e-11	2.15922e-08
ENSG00000255443	CD44-AS1	55.7907	-6.87689	0.970523	-7.08576	1.38287e-12	4.90832e-10

## Sheet: SW480_CD44s_vs_Parental
Supplementary File 5. List of Differential Expressed Gene in SW480 CD44s OE vs SW480 parental
ensembl_gene_id	hgnc_symbol	baseMean	log2FoldChange	lfcSE	stat	pvalue	padj
ENSG00000170627	GTSF1	60.9328	9.03477	2.78626	3.24262	0.00118437	0.0280357
ENSG00000099260	PALMD	20.8745	8.2956	1.65379	5.01611	5.2729e-07	4.97309e-05
ENSG00000233041	PHGR1	28.5393	8.24956	1.59305	5.17846	2.2373e-07	2.37075e-05
ENSG00000245311	ARNTL2-AS1	443.034	8.0138	0.833203	9.61806	6.7086e-22	7.55304e-19
ENSG00000254166	CASC19	30.8728	7.91503	1.57856	5.01409	5.32858e-07	4.99943e-05
ENSG00000071794	HLTF	17.2032	7.51443	1.77512	4.23319	2.30399e-05	0.00121003
ENSG00000079112	CDH17	13.0147	7.02267	1.71689	4.09035	4.30717e-05	0.00201531
ENSG00000184005	ST6GALNAC3	11.3256	7.01959	1.7737	3.95759	7.5709e-05	0.00312087
ENSG00000165443	PHYHIPL	23.5432	6.96836	1.61233	4.32191	1.54682e-05	0.00086805
ENSG00000178462	TUBAL3	11.8007	6.79353	1.74063	3.9029	9.50456e-05	0.00373832
ENSG00000157570	TSPAN18	8.31255	6.57991	1.90468	3.4546	0.000551101	0.0154634
ENSG00000142233	NTN5	7.99351	6.54507	1.88152	3.4786	0.000504043	0.0144354
ENSG00000272990		8.26073	6.53225	1.96604	3.32254	0.000892019	0.0224509
ENSG00000271503	CCL5	7.79872	6.49952	1.95326	3.32752	0.000876215	0.022294
ENSG00000124092	CTCFL	14.8864	6.43668	1.69286	3.80226	0.000143381	0.00517608
ENSG00000153956	CACNA2D1	10.2024	6.43	1.85092	3.47395	0.000512849	0.0146178
ENSG00000240086		10.341	6.37838	1.80334	3.53699	0.000404717	0.0120705
ENSG00000152952	PLOD2	17.3029	6.28396	1.67814	3.74459	0.000180686	0.00623539
ENSG00000104267	CA2	10.0844	6.27017	1.86354	3.36466	0.000766371	0.0201833
ENSG00000250155		7.38647	6.15072	1.96244	3.13423	0.00172306	0.0366829
ENSG00000205922	ONECUT3	39.5446	6.13874	2.07633	2.95654	0.00311109	0.0554902
ENSG00000204531	POU5F1	7.00535	6.1317	1.90547	3.21794	0.00129113	0.0300495
ENSG00000179774	ATOH7	6.88315	6.03717	1.9243	3.13733	0.00170492	0.036346
ENSG00000171951	SCG2	43.2261	5.95556	1.16488	5.1126	3.1776e-07	3.15655e-05
ENSG00000164749	HNF4G	7.36439	5.78692	1.90989	3.02997	0.00244575	0.0477813
ENSG00000196139	AKR1C3	68.0263	5.61154	0.870741	6.44456	1.15934e-10	2.51619e-08
ENSG00000196482	ESRRG	7.81374	5.449	1.88441	2.89162	0.00383266	0.0638093
ENSG00000124429	POF1B	41.8506	5.43053	1.16014	4.68092	2.85592e-06	0.000206476
ENSG00000255666	LINC02700	9.62041	5.40584	1.77622	3.04345	0.00233883	0.0462477
ENSG00000145721	LIX1	93.8922	5.37893	0.610932	8.80447	1.3147e-18	9.2019e-16
ENSG00000075223	SEMA3C	7.28685	5.36911	1.97907	2.71295	0.00666875	0.0927922
ENSG00000117519	CNN3	41.2028	5.35004	1.13915	4.69651	2.6465e-06	0.000194588
ENSG00000128918	ALDH1A2	10.1393	5.3423	1.75306	3.04742	0.00230814	0.0459944
ENSG00000023839	ABCC2	29.2909	5.30075	1.35342	3.91657	8.98172e-05	0.00358968
ENSG00000101445	PPP1R16B	8.17885	5.22419	1.92783	2.70988	0.00673078	0.0934116
ENSG00000131171	SH3BGRL	128.671	5.01305	0.642983	7.79655	6.36246e-15	2.54696e-12
ENSG00000104044	OCA2	10.2956	4.99007	1.74544	2.85891	0.00425096	0.0682503
ENSG00000225680		9.18444	4.91938	1.80099	2.73149	0.00630487	0.0893595
ENSG00000134590	RTL8C	32.3586	4.89439	1.05566	4.63633	3.54658e-06	0.000242
ENSG00000260249		30.7328	4.88172	0.952079	5.12743	2.9372e-07	2.98931e-05
ENSG00000077080	ACTL6B	12.5635	4.8802	1.76859	2.75938	0.00579111	0.0842659
ENSG00000169435	RASSF6	33.6611	4.86296	1.20035	4.0513	5.09331e-05	0.00228805
ENSG00000261092	LINC02178	209.728	4.7938	0.476049	10.07	7.50073e-24	1.35118e-20
ENSG00000139329	LUM	19.2279	4.78155	1.27902	3.73844	0.000185166	0.00636562
ENSG00000160180	TFF3	39.7475	4.77395	0.95415	5.00336	5.63408e-07	5.20474e-05
ENSG00000083067	TRPM3	48.1889	4.69485	0.71044	6.60837	3.88582e-11	9.33323e-09
ENSG00000165194	PCDH19	94.5401	4.6558	0.59258	7.85683	3.93992e-15	1.65055e-12
ENSG00000183072	NKX2-5	39.9571	4.63119	0.868142	5.33459	9.57596e-08	1.09873e-05
ENSG00000099399	MAGEB2	73.5337	4.54352	1.4917	3.04587	0.00232009	0.0461274
ENSG00000129675	ARHGEF6	11.8	4.49561	1.54196	2.91552	0.00355093	0.0606316
ENSG00000280780	JAKMIP2-AS1	13.2975	4.48539	1.35854	3.30162	0.000961285	0.0238192
ENSG00000111799	COL12A1	17.4117	4.46231	1.29192	3.45402	0.000552297	0.0154729
ENSG00000128298	BAIAP2L2	136.331	4.39191	0.498892	8.80333	1.32813e-18	9.2019e-16
ENSG00000109101	FOXN1	11.1062	4.37968	1.42847	3.066	0.00216941	0.0437623
ENSG00000105696	TMEM59L	12.3482	4.33556	1.40535	3.08503	0.00203529	0.0416634
ENSG00000135100	HNF1A	96.1558	4.33041	0.646893	6.69417	2.16906e-11	5.5033e-09
ENSG00000184588	PDE4B	58.2703	4.26948	0.814033	5.24485	1.56407e-07	1.68713e-05
ENSG00000224099		295.056	4.24588	0.352663	12.0395	2.20334e-33	1.32303e-29
ENSG00000163430	FSTL1	9.87049	4.2221	1.53446	2.75153	0.00593178	0.085621
ENSG00000187498	COL4A1	129.752	4.2128	0.501261	8.40439	4.30094e-17	2.42116e-14
ENSG00000107147	KCNT1	39.1908	4.20946	0.845023	4.98147	6.31023e-07	5.74104e-05
ENSG00000022556	NLRP2	29.9655	4.19247	1.23521	3.39414	0.000688449	0.0185377
ENSG00000253633		8.317	4.13712	1.52725	2.70886	0.0067515	0.0934969
ENSG00000154162	CDH12	17.0093	4.12039	1.32176	3.11735	0.00182483	0.0381439
ENSG00000113430	IRX4	15.5156	4.08876	1.36184	3.00238	0.00267874	0.0506879
ENSG00000100427	MLC1	28.6326	4.02852	0.899848	4.47689	7.57371e-06	0.000465641
ENSG00000164099	PRSS12	31.2104	4.02525	0.982609	4.09649	4.19455e-05	0.00197286
ENSG00000205809	KLRC2	96.6755	4.01184	0.553154	7.25266	4.08661e-13	1.24773e-10
ENSG00000135519	KCNH3	71.8018	3.99583	0.821873	4.86186	1.16288e-06	9.43611e-05
ENSG00000166025	AMOTL1	71.9577	3.9667	0.631106	6.28532	3.27186e-10	6.54882e-08
ENSG00000108176	DNAJC12	49.5421	3.95721	0.749406	5.28046	1.28858e-07	1.42408e-05
ENSG00000150750	C11orf53	16.1681	3.95451	1.3605	2.90666	0.00365316	0.0620245
ENSG00000144644	GADL1	18.3921	3.9008	0.975777	3.99764	6.39779e-05	0.00275054
ENSG00000186469	GNG2	51.811	3.89808	0.714521	5.45551	4.88313e-08	6.02498e-06
ENSG00000165685	TMEM52B	66.1756	3.85742	0.602818	6.39898	1.56415e-10	3.31488e-08
ENSG00000205413	SAMD9	116.871	3.8369	0.48827	7.85815	3.89835e-15	1.65055e-12
ENSG00000198842	STYXL2	12.1627	3.80838	1.29023	2.9517	0.00316033	0.0559235
ENSG00000135218	CD36	21.0769	3.72218	1.02921	3.61656	0.000298549	0.00945179
ENSG00000286011		10.2051	3.71929	1.34187	2.77172	0.00557612	0.0827416
ENSG00000174332	GLIS1	10.7889	3.7107	1.3482	2.75233	0.00591733	0.085481
ENSG00000197253	TPSB2	20.9213	3.68875	0.958031	3.85035	0.000117949	0.00438995
ENSG00000145623	OSMR	18.5428	3.67298	1.33289	2.75566	0.00585746	0.0848884
ENSG00000066230	SLC9A3	1990.28	3.61002	0.226171	15.9615	2.37107e-57	4.27124e-53
ENSG00000124302	CHST8	26.2783	3.59703	0.933035	3.85519	0.000115641	0.00432191
ENSG00000164509	IL31RA	24.711	3.59511	1.02282	3.51491	0.000439901	0.0128584
ENSG00000197635	DPP4	47.8689	3.55655	0.633497	5.61416	1.97516e-08	2.6955e-06
ENSG00000138646	HERC5	81.5265	3.53749	0.497719	7.1074	1.18248e-12	3.32832e-10
ENSG00000198796	ALPK2	18.2946	3.52994	0.957806	3.68544	0.000228306	0.00753243
ENSG00000170231	FABP6	24.9071	3.51445	1.02049	3.44388	0.000573438	0.0159167
ENSG00000254610		12.036	3.50806	1.26728	2.76818	0.00563696	0.0832568
ENSG00000015413	DPEP1	301.688	3.50446	0.385212	9.09749	9.24432e-20	7.56942e-17
ENSG00000165181	SHOC1	46.5123	3.47248	0.60157	5.77237	7.8163e-09	1.16366e-06
ENSG00000140937	CDH11	206.686	3.45278	1.08898	3.17064	0.00152101	0.033414
ENSG00000257893	LINC02404	19.5714	3.43029	1.16405	2.94685	0.0032103	0.0565855
ENSG00000244617	ASPRV1	290.926	3.40642	0.392592	8.67676	4.07203e-18	2.61977e-15
ENSG00000182621	PLCB1	18.9854	3.39671	1.04469	3.25142	0.00114831	0.0272539
ENSG00000185745	IFIT1	35.1855	3.3769	0.749748	4.50405	6.66705e-06	0.00041739
ENSG00000235300		18.7708	3.35026	0.984127	3.4043	0.000663349	0.0179526
ENSG00000163565	IFI16	16.6023	3.34767	1.09837	3.04786	0.00230477	0.045978
ENSG00000134874	DZIP1	43.8292	3.3217	0.669202	4.96367	6.91736e-07	6.1083e-05
ENSG00000188153	COL4A5	20.7072	3.29562	1.06182	3.10374	0.00191088	0.0395208
ENSG00000196220	SRGAP3	29.0651	3.28813	0.76679	4.28818	1.80146e-05	0.000987601
ENSG00000171517	LPAR3	22.3027	3.28542	1.00313	3.27518	0.00105596	0.0256363
ENSG00000198157	HMGN5	69.058	3.26094	0.584	5.5838	2.35315e-08	3.16341e-06
ENSG00000250385		56.7471	3.24594	0.595514	5.45066	5.01819e-08	6.1495e-06
ENSG00000108984	MAP2K6	23.0757	3.23047	0.899858	3.58998	0.000330704	0.0102712
ENSG00000152931	PART1	29.3947	3.22474	0.800375	4.02904	5.60046e-05	0.00245467
ENSG00000135373	EHF	816.625	3.19218	0.269003	11.8667	1.76324e-32	7.94076e-29
ENSG00000185432	METTL7A	38.1949	3.1912	0.74357	4.29172	1.77295e-05	0.00098231
ENSG00000169962	TAS1R3	169.675	3.18151	0.474534	6.7045	2.02103e-11	5.20098e-09
ENSG00000176153	GPX2	716.961	3.1615	0.318068	9.9397	2.79669e-23	4.1983e-20
ENSG00000172349	IL16	1824.48	3.152	0.31474	10.0146	1.31451e-23	2.15269e-20
ENSG00000159713	TPPP3	53.162	3.13927	0.631301	4.97269	6.60288e-07	5.90222e-05
ENSG00000162817	C1orf115	32.3321	3.13702	0.847568	3.7012	0.000214579	0.00716176
ENSG00000107105	ELAVL2	71.1028	3.12487	0.521026	5.99754	2.00334e-09	3.31085e-07
ENSG00000178075	GRAMD1C	28.1932	3.11737	0.828684	3.76183	0.000168673	0.00588851
ENSG00000148408	CACNA1B	30.4583	3.10485	0.792776	3.91643	8.98716e-05	0.00358968
ENSG00000257322		17.0027	3.07807	1.04317	2.9507	0.0031706	0.0559952
ENSG00000066382	MPPED2	59.7767	3.07598	0.679962	4.52375	6.07538e-06	0.000384006
ENSG00000155980	KIF5A	51.9526	3.04234	0.607008	5.01202	5.38625e-07	5.02735e-05
ENSG00000159674	SPON2	26.2009	3.03344	0.905521	3.34994	0.000808301	0.021072
ENSG00000177707	NECTIN3	31.6047	2.99432	0.719965	4.15898	3.19675e-05	0.0015864
ENSG00000052344	PRSS8	22.7309	2.97401	0.995528	2.98736	0.00281394	0.0520234
ENSG00000150627	WDR17	33.7036	2.94102	0.829059	3.54742	0.000389029	0.0116799
ENSG00000113209	PCDHB5	49.0759	2.92636	0.624414	4.68656	2.77832e-06	0.000202626
ENSG00000250722	SELENOP	24.1379	2.88655	0.808314	3.57108	0.000355511	0.0109286
ENSG00000187601	MAGEH1	46.322	2.86699	0.623105	4.60113	4.20202e-06	0.000280352
ENSG00000154269	ENPP3	29.0779	2.86411	0.831027	3.44647	0.000567964	0.0158135
ENSG00000133321	PLAAT4	24.1651	2.85361	0.807073	3.53575	0.000406616	0.0121071
ENSG00000109472	CPE	38.8959	2.85358	0.799971	3.56711	0.000360941	0.0110203
ENSG00000119125	GDA	444.203	2.84241	0.321108	8.85189	8.60481e-19	6.45863e-16
ENSG00000117600	PLPPR4	157.456	2.81763	0.466895	6.03483	1.59126e-09	2.70425e-07
ENSG00000154822	PLCL2	14.4267	2.80886	1.04644	2.6842	0.00727025	0.098545
ENSG00000156869	FRRS1	15.9016	2.79102	1.006	2.77437	0.00553088	0.0822056
ENSG00000127533	F2RL3	57.3616	2.77956	0.555386	5.00473	5.59407e-07	5.19441e-05
ENSG00000114948	ADAM23	96.3191	2.77048	0.420685	6.58565	4.52892e-11	1.07347e-08
ENSG00000147180	ZNF711	48.5282	2.73178	0.669866	4.0781	4.54044e-05	0.00209185
ENSG00000110002	VWA5A	18.5283	2.7257	0.937438	2.9076	0.00364211	0.0620122
ENSG00000204983	PRSS1	25.1333	2.70102	0.881926	3.06264	0.00219391	0.0441577
ENSG00000142173	COL6A2	174.578	2.68088	0.501373	5.34706	8.93929e-08	1.03892e-05
ENSG00000257345	LINC02413	15.4954	2.66401	0.947309	2.81218	0.00492065	0.0758908
ENSG00000163898	LIPH	22.7557	2.63059	0.840092	3.13131	0.0017403	0.0368821
ENSG00000276644	DACH1	103.072	2.62378	0.409515	6.40703	1.4838e-10	3.18205e-08
ENSG00000131378	RFTN1	40.7314	2.5977	0.681834	3.80987	0.00013904	0.00503956
ENSG00000119922	IFIT2	52.2256	2.57571	0.644986	3.99343	6.5123e-05	0.00277992
ENSG00000180745	CLRN3	38.7579	2.5587	0.676029	3.78489	0.000153777	0.0054963
ENSG00000064201	TSPAN32	25.1064	2.53665	0.818809	3.09797	0.00194848	0.0401143
ENSG00000235493	LINC01967	20.0266	2.5304	0.880011	2.87542	0.00403486	0.0659563
ENSG00000132718	SYT11	33.2782	2.52294	0.795683	3.17079	0.00152027	0.033414
ENSG00000286989		18.1443	2.51829	0.899378	2.80003	0.00510971	0.0778734
ENSG00000205464	ATP6AP1L	605.389	2.50095	0.300124	8.33303	7.87986e-17	4.17494e-14
ENSG00000164764	SBSPON	19.1868	2.49261	0.914658	2.72518	0.00642663	0.0903742
ENSG00000257037	RARS1P1	60.8738	2.46712	0.549412	4.49047	7.10659e-06	0.000441442
ENSG00000257329		37.0057	2.45951	0.67333	3.65276	0.000259433	0.00839036
ENSG00000113140	SPARC	66.2303	2.45851	0.497469	4.94203	7.73138e-07	6.66379e-05
ENSG00000064655	EYA2	30.051	2.4498	0.73768	3.32095	0.000897121	0.0224614
ENSG00000256671	LIMS4	54.467	2.4111	0.710538	3.39335	0.000690441	0.0185636
ENSG00000231826	LINC01819	48.3795	2.40819	0.654697	3.67833	0.000234762	0.00771717
ENSG00000171724	VAT1L	365.824	2.37996	0.314782	7.56066	4.01039e-14	1.38929e-11
ENSG00000276122		41.1722	2.34932	0.648944	3.62022	0.000294353	0.0093462
ENSG00000287725		25.3501	2.34126	0.8437	2.77499	0.00552038	0.0821173
ENSG00000284740		49.0769	2.32607	0.553701	4.20095	2.65803e-05	0.00136027
ENSG00000186994	KANK3	38.1534	2.29356	0.690465	3.32176	0.000894517	0.0224514
ENSG00000168874	ATOH8	38.4415	2.26334	0.770297	2.93827	0.00330045	0.0579476
ENSG00000177301	KCNA2	29.986	2.26024	0.740357	3.05291	0.00226637	0.0454132
ENSG00000092096	SLC22A17	92.7037	2.21638	0.525621	4.2167	2.47908e-05	0.0012796
ENSG00000260573		49.6109	2.20322	0.591035	3.72773	0.00019321	0.00660433
ENSG00000182463	TSHZ2	127.279	2.19447	0.416724	5.266	1.39426e-07	1.53148e-05
ENSG00000283265		35.4966	2.18492	0.71754	3.04501	0.00232673	0.0461357
ENSG00000283405		119.196	2.1789	0.447426	4.86985	1.11682e-06	9.10334e-05
ENSG00000197594	ENPP1	38.0924	2.16683	0.71222	3.04236	0.00234734	0.0463143
ENSG00000141448	GATA6	51.0693	2.1661	0.523931	4.13432	3.56005e-05	0.00171932
ENSG00000184785	SMIM10	1278.02	2.16296	0.252021	8.58244	9.28787e-18	5.76937e-15
ENSG00000184486	POU3F2	63.3638	2.15909	0.552905	3.90498	9.42313e-05	0.00372255
ENSG00000159224	GIP	41.1502	2.15168	0.610108	3.52672	0.000420749	0.0124252
ENSG00000049089	COL9A2	29.091	2.1428	0.684167	3.13198	0.00173631	0.0368408
ENSG00000273419		31.9528	2.13656	0.787569	2.71285	0.00667069	0.0927922
ENSG00000126970	ZC4H2	444.759	2.12977	0.255862	8.32388	8.51298e-17	4.38151e-14
ENSG00000127920	GNG11	1449.93	2.12459	0.291713	7.28316	3.2609e-13	1.01279e-10
ENSG00000090382	LYZ	33.7811	2.11438	0.693391	3.04934	0.00229346	0.0458031
ENSG00000185686	PRAME	35.883	2.10487	0.679082	3.09957	0.00193799	0.0399993
ENSG00000071909	MYO3B	226.118	2.09616	0.323264	6.48436	8.91065e-11	1.98168e-08
ENSG00000122877	EGR2	116.184	2.09117	0.503664	4.15192	3.29702e-05	0.00162416
ENSG00000149557	FEZ1	228.717	2.08713	0.307844	6.7798	1.20339e-11	3.23549e-09
ENSG00000197046	SIGLEC15	150.196	2.08159	0.503709	4.13252	3.5881e-05	0.00172824
ENSG00000128242	GAL3ST1	31.2519	2.06328	0.765101	2.69674	0.00700213	0.0958363
ENSG00000127252	PLAAT1	26.5422	2.04935	0.746018	2.74705	0.00601348	0.086454
ENSG00000138449	SLC40A1	54.2216	2.0488	0.506774	4.04282	5.28112e-05	0.00236065
ENSG00000154319	FAM167A	61.8127	2.03008	0.503398	4.03275	5.51276e-05	0.00242804
ENSG00000026652	AGPAT4	89.1046	2.02728	0.428507	4.73104	2.23378e-06	0.000166968
ENSG00000169442	CD52	79.9288	2.02418	0.492846	4.10713	4.00599e-05	0.00189549
ENSG00000186409	CCDC30	29.8804	2.00264	0.696668	2.8746	0.00404546	0.0660697
ENSG00000085662	AKR1B1	72.7973	1.99728	0.599136	3.3336	0.000857296	0.0219054
ENSG00000081248	CACNA1S	94.8007	1.99571	0.436793	4.569	4.90053e-06	0.000321221
ENSG00000272769		62.4898	1.99077	0.495503	4.01767	5.8776e-05	0.00255747
ENSG00000104112	SCG3	56.4005	1.98796	0.661219	3.00652	0.0026426	0.0502093
ENSG00000132821	VSTM2L	38.3394	1.97505	0.605635	3.26113	0.0011097	0.0266179
ENSG00000175471	MCTP1	438.268	1.96284	0.272893	7.19271	6.352e-13	1.87582e-10
ENSG00000198682	PAPSS2	38.0071	1.95063	0.623593	3.12805	0.00175971	0.0371989
ENSG00000163531	NFASC	72.6971	1.94785	0.4544	4.28664	1.81395e-05	0.000987601
ENSG00000203778	FAM229B	90.277	1.9427	0.481454	4.03507	5.4586e-05	0.00241855
ENSG00000116141	MARK1	28.1322	1.92812	0.706586	2.72878	0.00635695	0.0897153
ENSG00000082126	MPP4	29.7623	1.92661	0.703601	2.73822	0.0061773	0.0882458
ENSG00000137142	IGFBPL1	224.134	1.91257	0.393871	4.85582	1.19887e-06	9.68077e-05
ENSG00000006468	ETV1	680.098	1.91185	0.285702	6.69177	2.2048e-11	5.51628e-09
ENSG00000116544	DLGAP3	124.206	1.90899	0.370834	5.14783	2.63518e-07	2.71258e-05
ENSG00000168386	FILIP1L	67.7839	1.90261	0.495754	3.83782	0.000124131	0.00460101
ENSG00000135439	AGAP2	73.506	1.89886	0.528916	3.59009	0.000330562	0.0102712
ENSG00000237941	KCNQ1DN	51.6702	1.89789	0.599547	3.16553	0.00154799	0.0338826
ENSG00000160862	AZGP1	93.038	1.88761	0.45412	4.15663	3.22983e-05	0.00159841
ENSG00000243836	WDR86-AS1	58.4498	1.88445	0.592599	3.17998	0.00147284	0.0326746
ENSG00000121858	TNFSF10	104.091	1.87527	0.424651	4.41603	1.0053e-05	0.00059767
ENSG00000188488	SERPINA5	43.5241	1.8655	0.579396	3.21973	0.00128312	0.0299019
ENSG00000198598	MMP17	79.5544	1.86385	0.496679	3.75263	0.000174989	0.00608543
ENSG00000184500	PROS1	103.779	1.8629	0.409201	4.55254	5.30029e-06	0.000340998
ENSG00000172551	MUCL1	626.974	1.85768	0.305378	6.0832	1.17811e-09	2.02118e-07
ENSG00000058335	RASGRF1	1468.4	1.85149	0.204876	9.03711	1.60869e-19	1.25996e-16
ENSG00000145569	OTULINL	274.063	1.83587	0.324684	5.65434	1.56448e-08	2.15134e-06
ENSG00000231107	LINC01508	80.087	1.83538	0.45897	3.9989	6.36378e-05	0.00274252
ENSG00000146411	SLC2A12	65.0292	1.83154	0.540294	3.3899	0.000699184	0.0186871
ENSG00000165507	DEPP1	43.2284	1.82723	0.602509	3.0327	0.00242374	0.0474578
ENSG00000075213	SEMA3A	349.129	1.81777	0.342217	5.31175	1.08579e-07	1.21487e-05
ENSG00000138613	APH1B	43.169	1.80003	0.578599	3.11101	0.00186449	0.0388738
ENSG00000156804	FBXO32	205.892	1.79603	0.310355	5.78702	7.16461e-09	1.07553e-06
ENSG00000164484	TMEM200A	81.8227	1.79403	0.568483	3.15582	0.00160047	0.0346109
ENSG00000155324	GRAMD2B	51.3515	1.78247	0.548047	3.25241	0.00114431	0.0272308
ENSG00000273079	GRIN2B	38.991	1.7724	0.636487	2.78465	0.00535848	0.0804398
ENSG00000268089	GABRQ	197.075	1.76501	0.333033	5.29981	1.15926e-07	1.28907e-05
ENSG00000146090	RASGEF1C	51.0501	1.75438	0.623669	2.81301	0.00490805	0.075879
ENSG00000133116	KL	63.1838	1.74905	0.494789	3.53494	0.000407861	0.0121241
ENSG00000176909	MAMSTR	36.6099	1.74801	0.636777	2.74509	0.00604935	0.0867619
ENSG00000137726	FXYD6	764.785	1.74605	0.226782	7.69923	1.36885e-14	5.19688e-12
ENSG00000099864	PALM	2235.7	1.74031	0.226081	7.69776	1.38476e-14	5.19688e-12
ENSG00000159403	C1R	81.0554	1.73612	0.445406	3.89783	9.70571e-05	0.00380084
ENSG00000077063	CTTNBP2	73.8587	1.73538	0.556335	3.11931	0.00181275	0.0379708
ENSG00000050165	DKK3	2466.48	1.73065	0.208827	8.2875	1.15658e-16	5.631e-14
ENSG00000198832	SELENOM	231.634	1.72404	0.3526	4.8895	1.01091e-06	8.35342e-05
ENSG00000162511	LAPTM5	1272.05	1.71858	0.310221	5.53985	3.02727e-08	4.0098e-06
ENSG00000166963	MAP1A	66.2962	1.71782	0.495624	3.46598	0.000528312	0.0149874
ENSG00000146013	GFRA3	95.0855	1.71694	0.447051	3.84059	0.00012274	0.00455884
ENSG00000100385	IL2RB	178.156	1.70888	0.424478	4.02583	5.67741e-05	0.00248235
ENSG00000087250	MT3	69.1462	1.69579	0.513512	3.30234	0.000958808	0.0237906
ENSG00000256977	LIMS3	56.9853	1.68397	0.584802	2.87956	0.0039823	0.065394
ENSG00000176046	NUPR1	50.0923	1.67315	0.552674	3.02737	0.00246693	0.0480424
ENSG00000004799	PDK4	113.851	1.67314	0.421442	3.97002	7.1866e-05	0.00299674
ENSG00000172716	SLFN11	51.9694	1.66515	0.509886	3.26574	0.00109179	0.0263286
ENSG00000135678	CPM	44.6083	1.66393	0.589834	2.82102	0.00478709	0.0742761
ENSG00000104833	TUBB4A	317.363	1.66193	0.278478	5.96791	2.40315e-09	3.93548e-07
ENSG00000271270	TMCC1-DT	101.41	1.66178	0.388184	4.2809	1.86138e-05	0.00100996
ENSG00000163364	LINC01116	60.7121	1.65749	0.495169	3.34732	0.000815982	0.0211498
ENSG00000006071	ABCC8	72.77	1.65377	0.58157	2.84364	0.0044602	0.0703556
ENSG00000102048	ASB9	71.8076	1.65303	0.466136	3.54623	0.000390782	0.0117131
ENSG00000163040	CCDC74A	354.446	1.64657	0.31356	5.25121	1.51099e-07	1.6397e-05
ENSG00000170579	DLGAP1	39.6465	1.644	0.580827	2.83045	0.00464824	0.0726223
ENSG00000172828	CES3	80.6934	1.637	0.517781	3.16156	0.00156926	0.034263
ENSG00000169855	ROBO1	228.822	1.6346	0.313548	5.21323	1.85579e-07	1.97812e-05
ENSG00000106003	LFNG	663.341	1.62761	0.314612	5.17337	2.29914e-07	2.42203e-05
ENSG00000204624	DISP3	67.2976	1.62407	0.461111	3.52208	0.000428177	0.0125586
ENSG00000197471	SPN	61.1014	1.6226	0.505212	3.21172	0.00131943	0.0303975
ENSG00000142619	PADI3	400.765	1.6196	0.294419	5.50102	3.77601e-08	4.92907e-06
ENSG00000158748	HTR6	45.9404	1.615	0.584428	2.76339	0.00572039	0.0837528
ENSG00000172020	GAP43	63.4542	1.61001	0.534958	3.0096	0.00261589	0.049918
ENSG00000131018	SYNE1	138.22	1.60847	0.381011	4.22158	2.42598e-05	0.00125941
ENSG00000174460	ZCCHC12	113.766	1.60404	0.373777	4.29144	1.77522e-05	0.00098231
ENSG00000196954	CASP4	256.587	1.59939	0.281161	5.68853	1.28141e-08	1.83201e-06
ENSG00000125848	FLRT3	66.9997	1.58335	0.520592	3.04144	0.00235453	0.0464053
ENSG00000103485	QPRT	4399.85	1.56909	0.211795	7.40857	1.27673e-13	4.03492e-11
ENSG00000250067	YJEFN3	68.296	1.56264	0.4999	3.12591	0.00177259	0.037303
ENSG00000106066	CPVL	426.788	1.5621	0.239759	6.51527	7.25573e-11	1.65449e-08
ENSG00000156113	KCNMA1	97.0883	1.54949	0.517444	2.9945	0.00274897	0.051423
ENSG00000223573	TINCR	99.0077	1.54485	0.449899	3.43378	0.000595228	0.0163701
ENSG00000180815	MAP3K15	94.4659	1.53696	0.421237	3.6487	0.000263575	0.00850903
ENSG00000003096	KLHL13	51.409	1.52759	0.548357	2.78577	0.00534014	0.0802983
ENSG00000250510	GPR162	113.956	1.52242	0.398265	3.82264	0.000132031	0.00484401
ENSG00000065413	ANKRD44	67.6774	1.51919	0.455158	3.33772	0.000844685	0.0217064
ENSG00000161544	CYGB	241.395	1.51389	0.307689	4.9202	8.64574e-07	7.27777e-05
ENSG00000112320	SOBP	208.671	1.51379	0.304343	4.97396	6.55973e-07	5.90222e-05
ENSG00000143851	PTPN7	272.836	1.50873	0.314374	4.79916	1.59333e-06	0.000124252
ENSG00000249375	CASC11	114.803	1.50591	0.411758	3.65726	0.000254928	0.00827437
ENSG00000128602	SMO	499.953	1.50035	0.278543	5.38641	7.18783e-08	8.57494e-06
ENSG00000163293	NIPAL1	135.898	-1.50288	0.342647	-4.38609	1.15407e-05	0.000672796
ENSG00000099250	NRP1	2840.84	-1.50577	0.531578	-2.83265	0.00461644	0.0721879
ENSG00000240668	KRT8P36	116.784	-1.50778	0.407812	-3.69724	0.000217955	0.007244
ENSG00000188112	C6orf132	1839.88	-1.51659	0.226716	-6.68938	2.24123e-11	5.53062e-09
ENSG00000100593	ISM2	1046.13	-1.51842	0.20449	-7.42539	1.12447e-13	3.68294e-11
ENSG00000171346	KRT15	214.626	-1.51918	0.316485	-4.80016	1.58535e-06	0.000124168
ENSG00000135423	GLS2	1714.82	-1.529	0.212856	-7.18325	6.80724e-13	1.97783e-10
ENSG00000106772	PRUNE2	82.9431	-1.53493	0.43337	-3.54184	0.000397348	0.0118901
ENSG00000116701	NCF2	98.5668	-1.53533	0.554411	-2.76931	0.0056176	0.0831515
ENSG00000071242	RPS6KA2	290.749	-1.53927	0.35029	-4.39426	1.11151e-05	0.000650086
ENSG00000128917	DLL4	51.5058	-1.54084	0.534716	-2.8816	0.00395665	0.0651083
ENSG00000171219	CDC42BPG	1172.55	-1.55097	0.216543	-7.1624	7.92777e-13	2.26684e-10
ENSG00000258744		81.0685	-1.56432	0.490802	-3.18728	0.0014362	0.0320612
ENSG00000180573	H2AC6	1038.83	-1.57599	0.277434	-5.6806	1.34225e-08	1.90389e-06
ENSG00000197587	DMBX1	92.2642	-1.57693	0.493523	-3.19525	0.00139708	0.0314195
ENSG00000146648	EGFR	3751.7	-1.5798	0.566792	-2.78727	0.00531548	0.0799942
ENSG00000137462	TLR2	58.8348	-1.58051	0.563056	-2.80703	0.00500009	0.0765916
ENSG00000278291		690.96	-1.58284	0.248617	-6.36659	1.93279e-10	3.9565e-08
ENSG00000272695	GAS6-DT	152.463	-1.58326	0.441499	-3.5861	0.000335665	0.0104074
ENSG00000196890	H2BU1	66.9466	-1.58405	0.492807	-3.21435	0.00130741	0.030311
ENSG00000103534	TMC5	114.026	-1.58531	0.388439	-4.08122	4.48004e-05	0.00207464
ENSG00000183960	KCNH8	85.9081	-1.58828	0.544305	-2.918	0.00352287	0.0602669
ENSG00000166145	SPINT1	4982.78	-1.59896	0.174695	-9.15283	5.54597e-20	4.99526e-17
ENSG00000104059	FAM189A1	658.143	-1.60078	0.314515	-5.08969	3.58655e-07	3.51131e-05
ENSG00000204839	MROH6	3728.59	-1.60194	0.237852	-6.73501	1.63919e-11	4.3424e-09
ENSG00000139269	INHBE	272.693	-1.62028	0.430093	-3.76728	0.000165038	0.00578402
ENSG00000159166	LAD1	3591.08	-1.62448	0.269773	-6.02165	1.72649e-09	2.90663e-07
ENSG00000198719	DLL1	101.437	-1.64476	0.399459	-4.11748	3.83039e-05	0.00183512
ENSG00000225756	DBH-AS1	288.21	-1.64585	0.334006	-4.92759	8.32483e-07	7.10728e-05
ENSG00000169116	PARM1	118.06	-1.64744	0.500046	-3.29458	0.000985673	0.0243107
ENSG00000183421	RIPK4	469.914	-1.6582	0.288859	-5.74053	9.43807e-09	1.38877e-06
ENSG00000154764	WNT7A	405.032	-1.68679	0.338837	-4.97816	6.41906e-07	5.8107e-05
ENSG00000160471	COX6B2	64.1496	-1.6889	0.547325	-3.08573	0.00203051	0.0416128
ENSG00000117472	TSPAN1	565.281	-1.69075	0.32748	-5.16293	2.43119e-07	2.54624e-05
ENSG00000282221		67.4779	-1.69149	0.466956	-3.62238	0.00029191	0.00930703
ENSG00000053747	LAMA3	1503.24	-1.71864	0.226777	-7.57858	3.49358e-14	1.25867e-11
ENSG00000163283	ALPP	257.675	-1.72408	0.412857	-4.17598	2.96705e-05	0.00149715
ENSG00000140832	MARVELD3	262.551	-1.7243	0.315084	-5.47252	4.43683e-08	5.58917e-06
ENSG00000165929	TC2N	552.207	-1.73318	0.232428	-7.45685	8.8615e-14	2.95613e-11
ENSG00000261183	SPINT1-AS1	315.513	-1.73508	0.281796	-6.15723	7.40294e-10	1.36078e-07
ENSG00000215866	LINC01356	905.483	-1.75486	0.209605	-8.37222	5.6542e-17	3.08651e-14
ENSG00000053108	FSTL4	709.969	-1.75726	0.287221	-6.11816	9.46622e-10	1.67181e-07
ENSG00000125850	OVOL2	306.189	-1.76995	0.263342	-6.72109	1.80376e-11	4.70913e-09
ENSG00000169306	IL1RAPL1	113.422	-1.79437	0.58916	-3.04564	0.00232186	0.0461274
ENSG00000058085	LAMC2	1807.62	-1.79541	0.23513	-7.63585	2.24336e-14	8.24732e-12
ENSG00000168209	DDIT4	2609.32	-1.79626	0.61482	-2.92161	0.00348229	0.0597428
ENSG00000119888	EPCAM	8352.51	-1.80929	0.185476	-9.75482	1.75917e-22	2.26355e-19
ENSG00000107317	PTGDS	97.0045	-1.81863	0.491016	-3.7038	0.000212395	0.0071382
ENSG00000154102	C16orf74	208.918	-1.83983	0.428753	-4.29113	1.77769e-05	0.00098231
ENSG00000226145	KRT16P6	77.2028	-1.84615	0.499946	-3.6927	0.000221889	0.00734763
ENSG00000120055	C10orf95	54.7791	-1.85521	0.540092	-3.435	0.000592561	0.0163217
ENSG00000142408	CACNG8	85.8976	-1.86438	0.456901	-4.08049	4.49402e-05	0.00207578
ENSG00000165474	GJB2	884.787	-1.86821	0.325488	-5.73973	9.48254e-09	1.38877e-06
ENSG00000196878	LAMB3	2258.7	-1.87033	0.24255	-7.71114	1.24697e-14	4.88324e-12
ENSG00000075618	FSCN1	7830.82	-1.87406	0.64599	-2.90107	0.00371896	0.0627866
ENSG00000133048	CHI3L1	1293.95	-1.87533	0.221889	-8.45163	2.87268e-17	1.6693e-14
ENSG00000258404	LINC02320	102.731	-1.88087	0.566398	-3.32075	0.000897758	0.0224614
ENSG00000126460	PRRG2	282.988	-1.88217	0.28865	-6.52058	7.00369e-11	1.61749e-08
ENSG00000135406	PRPH	121.439	-1.89728	0.531708	-3.56828	0.000359327	0.0109897
ENSG00000262152	LINC00514	96.7839	-1.89992	0.431032	-4.40783	1.0441e-05	0.000618697
ENSG00000138623	SEMA7A	253.43	-1.90091	0.406954	-4.67108	2.99622e-06	0.000214093
ENSG00000168875	SOX14	87.8138	-1.90974	0.473015	-4.03739	5.405e-05	0.00241004
ENSG00000233760		58.9406	-1.91244	0.514188	-3.71934	0.000199742	0.00678044
ENSG00000258512	LINC00239	202.74	-1.95494	0.353357	-5.53246	3.15764e-08	4.15195e-06
ENSG00000123454	DBH	144.482	-1.95715	0.504529	-3.87916	0.000104819	0.00402605
ENSG00000275234		108.382	-1.96087	0.395998	-4.95171	7.35629e-07	6.40175e-05
ENSG00000153093	ACOXL	49.156	-1.97653	0.585441	-3.37613	0.000735127	0.0194744
ENSG00000164400	CSF2	52.9486	-1.99066	0.586469	-3.39432	0.000687989	0.0185377
ENSG00000140563	MCTP2	79.2584	-2.00341	0.488559	-4.10064	4.12002e-05	0.00194288
ENSG00000189433	GJB4	88.5445	-2.03667	0.508939	-4.00181	6.28605e-05	0.00271551
ENSG00000179148	ALOXE3	392.893	-2.04838	0.334036	-6.13222	8.66605e-10	1.55037e-07
ENSG00000119866	BCL11A	195.14	-2.05566	0.333479	-6.16427	7.08084e-10	1.31499e-07
ENSG00000188293	IGFL1	36.5317	-2.06239	0.725107	-2.84426	0.00445147	0.070341
ENSG00000135525	MAP7	1113.14	-2.06908	0.241773	-8.55796	1.14886e-17	6.89852e-15
ENSG00000257084	MIR200CHG	30.1078	-2.07363	0.674545	-3.07412	0.00211125	0.0428771
ENSG00000145920	CPLX2	2180.37	-2.07575	0.726617	-2.85674	0.0042802	0.0684755
ENSG00000086506	HBQ1	95.09	-2.07775	0.456782	-4.54866	5.3989e-06	0.000346106
ENSG00000233705	SLC26A4-AS1	94.8987	-2.0948	0.453018	-4.6241	3.76235e-06	0.000254793
ENSG00000064270	ATP2C2	71.7416	-2.10584	0.5157	-4.08346	4.43704e-05	0.00206002
ENSG00000146038	DCDC2	289.473	-2.10889	0.340129	-6.20027	5.63666e-10	1.09181e-07
ENSG00000146904	EPHA1	541.558	-2.11419	0.241254	-8.76335	1.89533e-18	1.26454e-15
ENSG00000179111	HES7	836.756	-2.12301	0.736566	-2.88231	0.00394773	0.065095
ENSG00000162069	BICDL2	133.848	-2.12356	0.418135	-5.07865	3.80128e-07	3.66183e-05
ENSG00000196684	HSH2D	117.816	-2.12598	0.44932	-4.73155	2.22807e-06	0.000166968
ENSG00000119411	BSPRY	561.897	-2.13439	0.267262	-7.98612	1.39248e-15	6.43184e-13
ENSG00000130487	KLHDC7B	46.7556	-2.1431	0.649401	-3.30013	0.000966409	0.0238805
ENSG00000232774		123.043	-2.15869	0.546027	-3.95346	7.70305e-05	0.0031681
ENSG00000175707	KDF1	494.313	-2.16307	0.237348	-9.11346	7.97976e-20	6.84511e-17
ENSG00000145103	ILDR1	283.27	-2.19849	0.278444	-7.89565	2.88812e-15	1.26894e-12
ENSG00000163624	CDS1	328.575	-2.24767	0.283227	-7.93592	2.08942e-15	9.4097e-13
ENSG00000204618	RNF39	37.5069	-2.27491	0.67057	-3.39251	0.000692556	0.0185927
ENSG00000099812	MISP	4125.72	-2.28131	0.235209	-9.69909	3.04204e-22	3.65328e-19
ENSG00000205426	KRT81	2650.44	-2.30084	0.30617	-7.51494	5.69392e-14	1.93529e-11
ENSG00000105550	FGF21	27.9466	-2.30846	0.768096	-3.00543	0.00265202	0.050288
ENSG00000237254	TRBV30	49.5978	-2.31662	0.639105	-3.62479	0.000289193	0.00925313
ENSG00000142484	TM4SF5	25.3872	-2.31882	0.837983	-2.76715	0.00565489	0.0832727
ENSG00000196542	SPTSSB	240.334	-2.32448	0.429306	-5.4145	6.14591e-08	7.43036e-06
ENSG00000253313	C1orf210	78.0484	-2.36244	0.537108	-4.39845	1.09028e-05	0.000641843
ENSG00000248112		46.6421	-2.36958	0.731769	-3.23815	0.00120309	0.0283672
ENSG00000244459		30.6363	-2.38353	0.682461	-3.49256	0.00047842	0.0137452
ENSG00000112195	TREML2	1618.6	-2.38439	0.292215	-8.15971	3.35828e-16	1.592e-13
ENSG00000130545	CRB3	630.276	-2.4003	0.225962	-10.6226	2.34035e-26	6.02273e-23
ENSG00000272079		25.4025	-2.40347	0.82687	-2.9067	0.00365258	0.0620245
ENSG00000184349	EFNA5	42.254	-2.40717	0.586101	-4.1071	4.00666e-05	0.00189549
ENSG00000041982	TNC	442.58	-2.41813	0.319669	-7.56447	3.89453e-14	1.37561e-11
ENSG00000150556	LYPD6B	269.592	-2.43865	0.355207	-6.86543	6.62919e-12	1.80937e-09
ENSG00000103888	CEMIP	541.86	-2.45885	0.331692	-7.41304	1.23434e-13	3.97061e-11
ENSG00000125384	PTGER2	25.5561	-2.48329	0.877589	-2.82967	0.00465953	0.0726726
ENSG00000104413	ESRP1	1334.2	-2.48402	0.25119	-9.88899	4.64678e-23	6.439e-20
ENSG00000062038	CDH3	1157.4	-2.49014	0.265851	-9.36669	7.4846e-21	7.49042e-18
ENSG00000237330	RNF223	130.19	-2.49692	0.408823	-6.10758	1.01154e-09	1.76911e-07
ENSG00000181885	CLDN7	3778.92	-2.50067	0.241918	-10.3368	4.80127e-25	9.61001e-22
ENSG00000213937	CLDN9	170.479	-2.51028	0.39682	-6.326	2.51604e-10	5.09257e-08
ENSG00000182931	WFDC10B	35.0306	-2.54188	0.8694	-2.92372	0.00345872	0.0594517
ENSG00000055118	KCNH2	853.891	-2.62126	0.336007	-7.80121	6.13162e-15	2.51034e-12
ENSG00000127129	EDN2	58.2418	-2.63606	0.608678	-4.33079	1.48578e-05	0.000839021
ENSG00000258334		22.8597	-2.67092	0.900147	-2.9672	0.00300525	0.0545732
ENSG00000082438	COBLL1	144.187	-2.68704	0.482204	-5.57241	2.51245e-08	3.35253e-06
ENSG00000219891	ZSCAN12P1	111.582	-2.71158	0.459238	-5.90452	3.53679e-09	5.54015e-07
ENSG00000135925	WNT10A	1173.27	-2.74504	0.243273	-11.2838	1.57848e-29	4.73913e-26
ENSG00000144130	NT5DC4	404.414	-2.78538	0.264102	-10.5466	5.26669e-26	1.18593e-22
ENSG00000162105	SHANK2	150.632	-2.81531	0.391349	-7.19387	6.29814e-13	1.87582e-10
ENSG00000237412	PRSS56	190.791	-2.88991	0.468177	-6.17267	6.71451e-10	1.27321e-07
ENSG00000204876		88.9933	-2.95519	0.484501	-6.09945	1.06436e-09	1.84359e-07
ENSG00000263325		13.5591	-2.95898	1.07962	-2.74076	0.00612976	0.0876361
ENSG00000203697	CAPN8	82.4013	-3.02335	0.558576	-5.41259	6.21186e-08	7.46003e-06
ENSG00000005001	PRSS22	562.077	-3.08012	0.324149	-9.50215	2.05604e-21	2.17868e-18
ENSG00000181333	HEPHL1	23.9199	-3.13497	1.06027	-2.95676	0.00310889	0.0554902
ENSG00000184502	GAST	16.108	-3.13769	1.07032	-2.93154	0.00337284	0.0586068
ENSG00000110944	IL23A	271.561	-3.18111	0.817575	-3.89092	9.98663e-05	0.00387714
ENSG00000106624	AEBP1	12.657	-3.22643	1.14648	-2.81421	0.00488973	0.0757382
ENSG00000167851	CD300A	71.5267	-3.29896	0.646068	-5.10622	3.28663e-07	3.23527e-05
ENSG00000172478	MAB21L4	968.691	-3.30119	0.288037	-11.461	2.07199e-30	7.46497e-27
ENSG00000148346	LCN2	1338.76	-3.3019	0.910655	-3.62585	0.000288007	0.00925313
ENSG00000091137	SLC26A4	76.2629	-3.30804	0.526587	-6.28203	3.34176e-10	6.61521e-08
ENSG00000104327	CALB1	35.3447	-3.32215	0.792488	-4.19205	2.76445e-05	0.00140278
ENSG00000039068	CDH1	358.741	-3.42826	0.843574	-4.06397	4.8246e-05	0.00221146
ENSG00000147676	MAL2	1235.92	-3.6057	0.282385	-12.7687	2.4512e-37	2.20779e-33
ENSG00000171401	KRT13	2228.24	-3.71886	0.604213	-6.15488	7.51346e-10	1.36715e-07
ENSG00000164690	SHH	235.004	-4.03934	0.438619	-9.20923	3.28485e-20	3.11438e-17
ENSG00000121898	CPXM2	16.3597	-4.08377	1.33886	-3.0502	0.0022869	0.0457228
ENSG00000164867	NOS3	1582.61	-4.15729	1.19538	-3.47779	0.000505573	0.0144362
ENSG00000165125	TRPV6	48.8601	-4.27744	0.814121	-5.25406	1.48786e-07	1.62439e-05
ENSG00000262823		44.7822	-4.50197	0.802331	-5.61112	2.01026e-08	2.72277e-06
ENSG00000181126	HLA-V	16.1083	-5.10504	1.33239	-3.83151	0.000127361	0.00471105
ENSG00000223784	LINP1	8.28261	-5.2493	1.84949	-2.83824	0.00453625	0.0713677
ENSG00000204421	LY6G6C	7.31583	-6.62929	1.9115	-3.46811	0.000524131	0.0148923

## Sheet: SW480_CD44v6_vs_Parental
Supplementary File 5. List of Differential Expressed Gene in SW480 CD44v6 OE vs SW480 parental
ensembl_gene_id	hgnc_symbol	baseMean	log2FoldChange	lfcSE	stat	pvalue	padj
ENSG00000255443	CD44-AS1	55.7907	8.29949	1.48534	5.58761	2.30214e-08	1.56509e-05
ENSG00000165443	PHYHIPL	23.5432	7.91149	1.60678	4.92381	8.48756e-07	0.000273372
ENSG00000254166	CASC19	30.8728	7.89769	1.5791	5.00139	5.6919e-07	0.000208491
ENSG00000152952	PLOD2	17.3029	7.57701	1.66725	4.54462	5.50334e-06	0.00137077
ENSG00000124092	CTCFL	14.8864	7.17813	1.68665	4.25585	2.08255e-05	0.00391373
ENSG00000233041	PHGR1	28.5393	7.12384	1.59996	4.45252	8.48677e-06	0.0018874
ENSG00000071794	HLTF	17.2032	6.40388	1.78524	3.58713	0.000334342	0.0307677
ENSG00000104267	CA2	10.0844	6.31528	1.86416	3.38773	0.000704746	0.0550852
ENSG00000242741	LINC02005	6.07765	6.28033	1.98613	3.1621	0.00156638	0.0931896
ENSG00000196482	ESRRG	7.81374	6.28027	1.87216	3.35456	0.000794903	0.0580062
ENSG00000240086		10.341	6.27511	1.80582	3.47494	0.000510972	0.0418661
ENSG00000124429	POF1B	41.8506	6.21431	1.15666	5.37264	7.75942e-08	4.5298e-05
ENSG00000178462	TUBAL3	11.8007	6.17988	1.7489	3.53358	0.000409969	0.0343441
ENSG00000079112	CDH17	13.0147	6.17638	1.72725	3.57585	0.000349091	0.0312486
ENSG00000153956	CACNA2D1	10.2024	6.17445	1.85527	3.32807	0.000874509	0.0615763
ENSG00000137965	IFI44	6.50759	6.17248	1.95701	3.15403	0.00161032	0.094897
ENSG00000075223	SEMA3C	7.28685	6.16867	1.96715	3.13585	0.0017136	0.0994152
ENSG00000175311	ANKS4B	6.67243	6.07021	1.93187	3.14214	0.00167717	0.0976051
ENSG00000169435	RASSF6	33.6611	6.01595	1.19354	5.04045	4.64438e-07	0.000184599
ENSG00000171951	SCG2	43.2261	5.88507	1.16565	5.04873	4.44764e-07	0.000184599
ENSG00000196139	AKR1C3	68.0263	5.50803	0.871532	6.31995	2.61652e-10	3.49138e-07
ENSG00000023839	ABCC2	29.2909	5.34745	1.35371	3.95023	7.80773e-05	0.0107247
ENSG00000117519	CNN3	41.2028	5.31836	1.13979	4.66609	3.0699e-06	0.000843366
ENSG00000154162	CDH12	17.0093	4.99579	1.31305	3.80473	0.000141961	0.0168224
ENSG00000150750	C11orf53	16.1681	4.97551	1.3497	3.6864	0.000227453	0.0234754
ENSG00000131171	SH3BGRL	128.671	4.86477	0.64368	7.55775	4.101e-14	7.66107e-11
ENSG00000165194	PCDH19	94.5401	4.7917	0.59241	8.08848	6.04131e-16	1.61225e-12
ENSG00000187498	COL4A1	129.752	4.75266	0.499603	9.51287	1.8547e-21	8.66192e-18
ENSG00000139329	LUM	19.2279	4.73979	1.28034	3.70196	0.000213938	0.0224527
ENSG00000160180	TFF3	39.7475	4.73893	0.954967	4.9624	6.96276e-07	0.000236493
ENSG00000164099	PRSS12	31.2104	4.73633	0.977643	4.84464	1.2684e-06	0.000394917
ENSG00000135519	KCNH3	71.8018	4.65362	0.819532	5.67839	1.35969e-08	1.20954e-05
ENSG00000224099		295.056	4.60799	0.352049	13.0891	3.8016e-39	7.10177e-35
ENSG00000257893	LINC02404	19.5714	4.59361	1.15157	3.989	6.63536e-05	0.00960893
ENSG00000164509	IL31RA	24.711	4.57063	1.01387	4.5081	6.54099e-06	0.00149015
ENSG00000022556	NLRP2	29.9655	4.55901	1.23345	3.69614	0.000218905	0.0228456
ENSG00000183072	NKX2-5	39.9571	4.25301	0.871427	4.88051	1.0581e-06	0.000335022
ENSG00000128298	BAIAP2L2	136.331	4.23226	0.499788	8.46812	2.49381e-17	9.31735e-14
ENSG00000205809	KLRC2	96.6755	4.22842	0.552611	7.65172	1.98316e-14	4.63093e-11
ENSG00000107147	KCNT1	39.1908	4.20862	0.845718	4.97639	6.4781e-07	0.000224106
ENSG00000108176	DNAJC12	49.5421	4.18034	0.748581	5.58434	2.34583e-08	1.56509e-05
ENSG00000117114	ADGRL2	11.2895	4.17086	1.32136	3.15649	0.00159683	0.0943997
ENSG00000198157	HMGN5	69.058	4.15898	0.578893	7.18437	6.75171e-13	1.14663e-09
ENSG00000135100	HNF1A	96.1558	4.04742	0.648356	6.24258	4.30414e-10	5.36038e-07
ENSG00000277200		26.8702	4.00109	0.84893	4.71309	2.43985e-06	0.000690588
ENSG00000015413	DPEP1	301.688	3.99895	0.38437	10.4039	2.37992e-25	1.48198e-21
ENSG00000100427	MLC1	28.6326	3.97955	0.901192	4.41587	1.00603e-05	0.00218532
ENSG00000134590	RTL8C	32.3586	3.9665	1.06327	3.73047	0.000191123	0.0210022
ENSG00000260249		30.7328	3.76669	0.962904	3.9118	9.16101e-05	0.0120519
ENSG00000063015	SEZ6	16.1989	3.67954	1.09905	3.34792	0.000814206	0.0590149
ENSG00000177238	TRIM72	22.4928	3.6398	1.08217	3.36343	0.000769813	0.0573133
ENSG00000052344	PRSS8	22.7309	3.63024	0.989271	3.66961	0.000242922	0.0246632
ENSG00000109819	PPARGC1A	34.0684	3.56527	0.886516	4.02166	5.7789e-05	0.0087061
ENSG00000124302	CHST8	26.2783	3.52743	0.934668	3.77399	0.000160654	0.0185258
ENSG00000182621	PLCB1	18.9854	3.51365	1.04443	3.36419	0.000767675	0.0573133
ENSG00000135218	CD36	21.0769	3.4909	1.03286	3.37985	0.000725254	0.055755
ENSG00000104112	SCG3	56.4005	3.47501	0.650214	5.34441	9.07103e-08	4.90332e-05
ENSG00000171517	LPAR3	22.3027	3.4512	1.00236	3.44306	0.00057518	0.0465149
ENSG00000170231	FABP6	24.9071	3.43719	1.02214	3.36272	0.000771775	0.0573133
ENSG00000176153	GPX2	716.961	3.42805	0.317884	10.784	4.09815e-27	3.82788e-23
ENSG00000165591	FAAH2	16.9151	3.4256	0.999359	3.42779	0.000608509	0.0484481
ENSG00000185432	METTL7A	38.1949	3.39187	0.742667	4.56714	4.94417e-06	0.00126523
ENSG00000110777	POU2AF1	29.9923	3.38377	0.851566	3.97358	7.07993e-05	0.00994437
ENSG00000261678	SCRT1	48.0797	3.33281	0.583181	5.71489	1.09777e-08	1.07934e-05
ENSG00000169962	TAS1R3	169.675	3.28537	0.47451	6.92372	4.39947e-12	6.84887e-09
ENSG00000159713	TPPP3	53.162	3.15178	0.63191	4.98771	6.10998e-07	0.000219501
ENSG00000204983	PRSS1	25.1333	3.13994	0.878037	3.57609	0.000348775	0.0312486
ENSG00000276122		41.1722	3.1065	0.642473	4.83522	1.32999e-06	0.000407305
ENSG00000147180	ZNF711	48.5282	3.10364	0.667739	4.64798	3.35196e-06	0.000907505
ENSG00000184588	PDE4B	58.2703	3.02282	0.821721	3.67864	0.000234481	0.0239363
ENSG00000184486	POU3F2	63.3638	3.00432	0.547226	5.4901	4.01712e-08	2.58772e-05
ENSG00000244617	ASPRV1	290.926	2.97972	0.393729	7.56796	3.79131e-14	7.66107e-11
ENSG00000178075	GRAMD1C	28.1932	2.97385	0.831213	3.57772	0.000346604	0.0312486
ENSG00000245311	ARNTL2-AS1	443.034	2.87307	0.849667	3.38141	0.000721156	0.055688
ENSG00000260903	XKR7	69.3175	2.82188	0.711802	3.96441	7.35768e-05	0.0102574
ENSG00000155980	KIF5A	51.9526	2.80996	0.609586	4.60962	4.034e-06	0.00107656
ENSG00000131771	PPP1R1B	43.4884	2.80318	0.621618	4.50948	6.49861e-06	0.00149015
ENSG00000015520	NPC1L1	27.6915	2.77372	0.851319	3.25815	0.00112142	0.0732489
ENSG00000205413	SAMD9	116.871	2.64555	0.494408	5.35096	8.74911e-08	4.90332e-05
ENSG00000150627	WDR17	33.7036	2.6359	0.832643	3.1657	0.00154709	0.0929297
ENSG00000089486	CDIP1	23.8308	2.62163	0.788152	3.3263	0.000880085	0.0615763
ENSG00000169855	ROBO1	228.822	2.58337	0.310251	8.32669	8.31328e-17	2.58834e-13
ENSG00000054356	PTPRN	26.0271	2.56789	0.795579	3.2277	0.00124791	0.0784921
ENSG00000138646	HERC5	81.5265	2.52667	0.504946	5.00385	5.61972e-07	0.000208491
ENSG00000165507	DEPP1	43.2284	2.51896	0.596377	4.22378	2.4024e-05	0.00435722
ENSG00000128242	GAL3ST1	31.2519	2.4664	0.761754	3.23779	0.0012046	0.077281
ENSG00000167244	IGF2	46.7361	2.45021	0.753585	3.2514	0.00114837	0.0747482
ENSG00000185745	IFIT1	35.1855	2.42438	0.760259	3.18888	0.00142823	0.087192
ENSG00000142273	CBLC	45.042	2.40426	0.667886	3.59981	0.000318453	0.0298946
ENSG00000121858	TNFSF10	104.091	2.36257	0.422316	5.59433	2.21476e-08	1.56509e-05
ENSG00000160716	CHRNB2	77.5543	2.32053	0.519409	4.46763	7.90899e-06	0.00178009
ENSG00000197635	DPP4	47.8689	2.29206	0.645926	3.54848	0.00038746	0.0332025
ENSG00000283265		35.4966	2.26227	0.717726	3.15199	0.00162161	0.095262
ENSG00000119922	IFIT2	52.2256	2.25077	0.648173	3.47248	0.000515675	0.0420669
ENSG00000124467	PSG8	69.3608	2.24648	0.468955	4.7904	1.66446e-06	0.000501512
ENSG00000186994	KANK3	38.1534	2.23974	0.691921	3.23699	0.00120797	0.077281
ENSG00000131378	RFTN1	40.7314	2.19867	0.686399	3.20319	0.00135914	0.084073
ENSG00000257329		37.0057	2.1936	0.677051	3.23994	0.00119556	0.077281
ENSG00000231826	LINC01819	48.3795	2.17511	0.65736	3.30885	0.000936784	0.0641848
ENSG00000272636	DOC2B	43.3168	2.13527	0.590741	3.61456	0.000300855	0.028822
ENSG00000105929	ATP6V0A4	206.937	2.13402	0.400814	5.32421	1.0139e-07	5.26132e-05
ENSG00000183742	MACC1	112.228	2.11718	0.487244	4.34521	1.39141e-05	0.00285637
ENSG00000170017	ALCAM	112.358	2.09843	0.415225	5.05371	4.33305e-07	0.000183967
ENSG00000142173	COL6A2	174.578	2.07797	0.503461	4.12736	3.66947e-05	0.00617562
ENSG00000125730	C3	88.2642	2.06502	0.512974	4.02557	5.68365e-05	0.00868286
ENSG00000273151		158.644	2.05115	0.365212	5.61633	1.9506e-08	1.50103e-05
ENSG00000136010	ALDH1L2	67.1954	2.04243	0.57403	3.55806	0.000373606	0.0323736
ENSG00000123329	ARHGAP9	113.256	2.03564	0.463733	4.38969	1.13513e-05	0.0024097
ENSG00000224294	PINCR	61.1416	2.02013	0.515058	3.92215	8.77622e-05	0.0118785
ENSG00000095713	CRTAC1	57.2628	1.99465	0.552704	3.60889	0.000307508	0.0291601
ENSG00000248015		59.8163	1.94522	0.543882	3.57655	0.000348157	0.0312486
ENSG00000240476	LINC00973	132.118	1.94425	0.518983	3.74627	0.000179484	0.019958
ENSG00000102003	SYP	371.843	1.9338	0.344584	5.61199	2.00012e-08	1.50103e-05
ENSG00000129951	PLPPR3	75.8377	1.93338	0.512187	3.77475	0.000160167	0.0185258
ENSG00000283405		119.196	1.91116	0.449209	4.25451	2.09503e-05	0.00391373
ENSG00000103528	SYT17	53.4938	1.9098	0.534475	3.57323	0.000352607	0.0312486
ENSG00000122877	EGR2	116.184	1.90745	0.504916	3.77776	0.000158245	0.0184761
ENSG00000138152	BTBD16	102.11	1.90544	0.513098	3.7136	0.00020433	0.0220641
ENSG00000197471	SPN	61.1014	1.86593	0.50393	3.70276	0.00021327	0.0224527
ENSG00000162511	LAPTM5	1272.05	1.86151	0.310189	6.00121	1.95856e-09	2.07422e-06
ENSG00000164076	CAMKV	219.713	1.86019	0.397891	4.67512	2.93776e-06	0.00081911
ENSG00000089199	CHGB	126.938	1.84286	0.548962	3.35699	0.000787953	0.0577245
ENSG00000184515	BEX5	99.8939	1.83418	0.480484	3.81735	0.00013489	0.0162573
ENSG00000160862	AZGP1	93.038	1.82131	0.455134	4.0017	6.28879e-05	0.00932388
ENSG00000182575	NXPH3	378.237	1.81803	0.303111	5.99792	1.99861e-09	2.07422e-06
ENSG00000002933	TMEM176A	53.3437	1.80438	0.558578	3.23032	0.00123654	0.0784921
ENSG00000089558	KCNH4	63.8017	1.77864	0.518487	3.43045	0.000602576	0.0483121
ENSG00000132639	SNAP25	58.2706	1.7591	0.523363	3.36114	0.000776204	0.0573133
ENSG00000135439	AGAP2	73.506	1.73224	0.530708	3.26402	0.00109844	0.0719999
ENSG00000161544	CYGB	241.395	1.72417	0.30727	5.61124	2.00876e-08	1.50103e-05
ENSG00000185909	KLHDC8B	86.135	1.72351	0.494794	3.48328	0.00049531	0.041124
ENSG00000112297	CRYBG1	62.9224	1.72342	0.485123	3.55253	0.000381547	0.0328464
ENSG00000167771	RCOR2	116.227	1.71572	0.392125	4.37546	1.21178e-05	0.0025435
ENSG00000135472	FAIM2	160.779	1.70127	0.344128	4.94372	7.66465e-07	0.000255684
ENSG00000121653	MAPK8IP1	287.746	1.69013	0.335056	5.04433	4.5512e-07	0.000184599
ENSG00000008056	SYN1	131.233	1.68982	0.355692	4.7508	2.02612e-06	0.000591406
ENSG00000197847	SLC22A20P	126.526	1.66806	0.410521	4.06328	4.83887e-05	0.00759621
ENSG00000276644	DACH1	103.072	1.66288	0.416408	3.99338	6.51384e-05	0.0095815
ENSG00000204941	PSG5	213.299	1.66065	0.430469	3.85776	0.000114429	0.0141567
ENSG00000163694	RBM47	179.777	1.66042	0.365671	4.54076	5.60522e-06	0.00137778
ENSG00000198598	MMP17	79.5544	1.64576	0.498801	3.29944	0.000968784	0.0655719
ENSG00000113140	SPARC	66.2303	1.63557	0.505056	3.23839	0.00120206	0.077281
ENSG00000129354	AP1M2	447.539	1.62543	0.267692	6.07204	1.26296e-09	1.47458e-06
ENSG00000205464	ATP6AP1L	605.389	1.61129	0.30162	5.34212	9.18668e-08	4.90332e-05
ENSG00000019582	CD74	1149.82	1.60113	0.24626	6.50178	7.93766e-11	1.14064e-07
ENSG00000128268	MGAT3	181.75	1.59989	0.339244	4.71605	2.40463e-06	0.000690588
ENSG00000102048	ASB9	71.8076	1.57282	0.467556	3.36392	0.00076845	0.0573133
ENSG00000172349	IL16	1824.48	1.5722	0.315634	4.98108	6.32315e-07	0.000222873
ENSG00000197406	DIO3	267.876	1.56034	0.394137	3.95889	7.52989e-05	0.0104197
ENSG00000142619	PADI3	400.765	1.55733	0.294781	5.28299	1.2709e-07	6.2478e-05
ENSG00000181409	AATK	142.063	1.55704	0.36262	4.29387	1.75588e-05	0.00352705
ENSG00000065621	GSTO2	208.908	1.53091	0.363915	4.20677	2.59047e-05	0.00465314
ENSG00000267280	TBX2-AS1	67.5704	1.51337	0.462888	3.26941	0.00107771	0.0711405
ENSG00000170786	SDR16C5	113.717	1.51165	0.422566	3.57732	0.000347137	0.0312486
ENSG00000131831	RAI2	108.255	-1.50317	0.467065	-3.21833	0.00128941	0.0800246
ENSG00000205426	KRT81	2650.44	-1.57332	0.305632	-5.14776	2.63616e-07	0.000120113
ENSG00000233705	SLC26A4-AS1	94.8987	-1.63136	0.447335	-3.64685	0.000265474	0.0259895
ENSG00000198795	ZNF521	93.0933	-1.86524	0.452372	-4.12323	3.73598e-05	0.00623141
ENSG00000104371	DKK4	574.822	-1.88504	0.330781	-5.69876	1.20682e-08	1.12723e-05
ENSG00000091137	SLC26A4	76.2629	-2.05283	0.496066	-4.13822	3.50011e-05	0.00599868
ENSG00000130487	KLHDC7B	46.7556	-2.47055	0.660641	-3.73962	0.000184298	0.020372
ENSG00000099998	GGT5	67.7505	-2.50238	0.596358	-4.19611	2.71542e-05	0.00483113
ENSG00000112541	PDE10A	55.9162	-3.002	0.597404	-5.02508	5.03236e-07	0.000195853
ENSG00000150551	LYPD1	38.2174	-5.91591	1.29441	-4.57037	4.86872e-06	0.00126323
