# Supplementary material for: Alternative splicing downstream of EMT enhances phenotypic plasticity and malignant behavior in colon cancer
Source: eLife. 2022 Nov 8;11:e82006. doi: 10.7554/eLife.82006 (PMC9674345; doi:10.7554/eLife.82006)
Supplement: Supplementary file 6. [file elife-82006-supp6.xlsx]

## Sheet: fgseaMultilevel
	Supplementary File 6. GSEA analysis of CD44s OE vs CD44v6 OE vs parental in HCT116 and SW480 cells
	pathway	pval	padj	log2err	ES	NES	comparison
1	HALLMARK_ADIPOGENESIS	1	1	0.037303	0.169569	0.535481	HCT116_CD44std_vs_CD44v6
2	HALLMARK_ALLOGRAFT_REJECTION	0.558923	1	0.0647943	0.308415	0.963959	HCT116_CD44std_vs_CD44v6
3	HALLMARK_ANDROGEN_RESPONSE	0.961739	1	0.0410713	0.257734	0.754771	HCT116_CD44std_vs_CD44v6
4	HALLMARK_ANGIOGENESIS	0.00533443	0.0666803	0.407018	0.699467	1.65992	HCT116_CD44std_vs_CD44v6
5	HALLMARK_APICAL_JUNCTION	0.561039	1	0.0870516	-0.295691	-0.966704	HCT116_CD44std_vs_CD44v6
6	HALLMARK_APICAL_SURFACE	0.706865	1	0.0582216	0.335622	0.860827	HCT116_CD44std_vs_CD44v6
7	HALLMARK_APOPTOSIS	0.990338	1	0.054794	-0.238296	-0.762002	HCT116_CD44std_vs_CD44v6
8	HALLMARK_BILE_ACID_METABOLISM	0.0819277	0.585198	0.245042	-0.405175	-1.23357	HCT116_CD44std_vs_CD44v6
9	HALLMARK_CHOLESTEROL_HOMEOSTASIS	0.253571	0.798319	0.112379	0.392616	1.10162	HCT116_CD44std_vs_CD44v6
10	HALLMARK_COAGULATION	0.00225987	0.0564967	0.431708	0.504262	1.52116	HCT116_CD44std_vs_CD44v6
11	HALLMARK_COMPLEMENT	0.242928	0.798319	0.110565	0.343191	1.08466	HCT116_CD44std_vs_CD44v6
12	HALLMARK_DNA_REPAIR	1	1	0.0542316	-0.207463	-0.657209	HCT116_CD44std_vs_CD44v6
13	HALLMARK_E2F_TARGETS	0.14359	0.717949	0.188204	-0.344714	-1.12864	HCT116_CD44std_vs_CD44v6
14	HALLMARK_EPITHELIAL_MESENCHYMAL_TRANSITION	0.065	0.541667	0.227987	0.395754	1.24975	HCT116_CD44std_vs_CD44v6
15	HALLMARK_ESTROGEN_RESPONSE_EARLY	0.997462	1	0.0567672	-0.227402	-0.744599	HCT116_CD44std_vs_CD44v6
16	HALLMARK_ESTROGEN_RESPONSE_LATE	0.998358	1	0.036685	0.216873	0.688039	HCT116_CD44std_vs_CD44v6
17	HALLMARK_FATTY_ACID_METABOLISM	0.990291	1	0.0550211	-0.238127	-0.758414	HCT116_CD44std_vs_CD44v6
18	HALLMARK_G2M_CHECKPOINT	0.241117	0.798319	0.141225	-0.329988	-1.0805	HCT116_CD44std_vs_CD44v6
19	HALLMARK_GLYCOLYSIS	1	1	0.0365315	0.175751	0.55647	HCT116_CD44std_vs_CD44v6
20	HALLMARK_HEDGEHOG_SIGNALING	0.795045	1	0.0618406	-0.320795	-0.822855	HCT116_CD44std_vs_CD44v6
21	HALLMARK_HEME_METABOLISM	0.647255	1	0.0572461	0.294253	0.929991	HCT116_CD44std_vs_CD44v6
22	HALLMARK_HYPOXIA	0.121711	0.717949	0.161979	0.36857	1.16918	HCT116_CD44std_vs_CD44v6
23	HALLMARK_IL2_STAT5_SIGNALING	0.986842	1	0.0589694	-0.244163	-0.796851	HCT116_CD44std_vs_CD44v6
24	HALLMARK_IL6_JAK_STAT3_SIGNALING	0.2	0.798319	0.15017	-0.384482	-1.13057	HCT116_CD44std_vs_CD44v6
25	HALLMARK_INFLAMMATORY_RESPONSE	0.441472	1	0.0762797	0.31812	1.00321	HCT116_CD44std_vs_CD44v6
26	HALLMARK_INTERFERON_ALPHA_RESPONSE	0.0184811	0.184811	0.352488	-0.471735	-1.41022	HCT116_CD44std_vs_CD44v6
27	HALLMARK_INTERFERON_GAMMA_RESPONSE	0.135678	0.717949	0.191892	-0.349926	-1.13566	HCT116_CD44std_vs_CD44v6
28	HALLMARK_KRAS_SIGNALING_DN	0.521008	1	0.0681513	0.311668	0.974127	HCT116_CD44std_vs_CD44v6
29	HALLMARK_KRAS_SIGNALING_UP	0.255462	0.798319	0.107972	0.345021	1.08491	HCT116_CD44std_vs_CD44v6
30	HALLMARK_MITOTIC_SPINDLE	1	1	0.0571259	-0.110102	-0.360488	HCT116_CD44std_vs_CD44v6
31	HALLMARK_MTORC1_SIGNALING	1	1	0.0566484	-0.224162	-0.733988	HCT116_CD44std_vs_CD44v6
32	HALLMARK_MYC_TARGETS_V1	0.000816902	0.0408451	0.477271	-0.465053	-1.51009	HCT116_CD44std_vs_CD44v6
33	HALLMARK_MYC_TARGETS_V2	0.00521451	0.0666803	0.407018	-0.596974	-1.64178	HCT116_CD44std_vs_CD44v6
34	HALLMARK_MYOGENESIS	0.372712	1	0.0850427	0.326549	1.03206	HCT116_CD44std_vs_CD44v6
35	HALLMARK_NOTCH_SIGNALING	0.857914	1	0.04783	0.304457	0.747808	HCT116_CD44std_vs_CD44v6
36	HALLMARK_OXIDATIVE_PHOSPHORYLATION	1	1	0.0567672	-0.174489	-0.566863	HCT116_CD44std_vs_CD44v6
37	HALLMARK_P53_PATHWAY	0.973727	1	0.0378488	0.252465	0.800956	HCT116_CD44std_vs_CD44v6
38	HALLMARK_PANCREAS_BETA_CELLS	0.361798	1	0.104344	-0.420345	-1.06822	HCT116_CD44std_vs_CD44v6
39	HALLMARK_PEROXISOME	0.796253	1	0.0636424	-0.285853	-0.862149	HCT116_CD44std_vs_CD44v6
40	HALLMARK_PI3K_AKT_MTOR_SIGNALING	0.95	1	0.0412376	0.258617	0.760291	HCT116_CD44std_vs_CD44v6
41	HALLMARK_PROTEIN_SECRETION	1	1	0.0388759	0.172957	0.504384	HCT116_CD44std_vs_CD44v6
42	HALLMARK_REACTIVE_OXIGEN_SPECIES_PATHWAY	0.854809	1	0.0484088	0.297586	0.783904	HCT116_CD44std_vs_CD44v6
43	HALLMARK_SPERMATOGENESIS	0.541237	1	0.0673624	0.320686	0.963315	HCT116_CD44std_vs_CD44v6
44	HALLMARK_TGF_BETA_SIGNALING	0.548387	1	0.0687943	0.345871	0.936787	HCT116_CD44std_vs_CD44v6
45	HALLMARK_TNFA_SIGNALING_VIA_NFKB	0.616751	1	0.0806388	-0.290849	-0.947219	HCT116_CD44std_vs_CD44v6
46	HALLMARK_UNFOLDED_PROTEIN_RESPONSE	0.843972	1	0.0613026	-0.280414	-0.852808	HCT116_CD44std_vs_CD44v6
47	HALLMARK_UV_RESPONSE_DN	0.980769	1	0.0550211	-0.241489	-0.766227	HCT116_CD44std_vs_CD44v6
48	HALLMARK_UV_RESPONSE_UP	0.815254	1	0.0474483	0.278554	0.863563	HCT116_CD44std_vs_CD44v6
49	HALLMARK_WNT_BETA_CATENIN_SIGNALING	0.176252	0.798319	0.141225	0.469393	1.19918	HCT116_CD44std_vs_CD44v6
50	HALLMARK_XENOBIOTIC_METABOLISM	0.524876	1	0.0883594	-0.299383	-0.972579	HCT116_CD44std_vs_CD44v6
51	HALLMARK_ADIPOGENESIS	0.9862	1	0.0127011	0.232534	0.694908	HCT116_CD44std_vs_Parental
52	HALLMARK_ALLOGRAFT_REJECTION	0.000907967	0.00324274	0.477271	0.499805	1.48311	HCT116_CD44std_vs_Parental
53	HALLMARK_ANDROGEN_RESPONSE	0.998883	1	0.0157838	0.207451	0.587344	HCT116_CD44std_vs_Parental
54	HALLMARK_ANGIOGENESIS	0.076716	0.201884	0.186433	0.595387	1.40066	HCT116_CD44std_vs_Parental
55	HALLMARK_APICAL_JUNCTION	0.658281	0.91351	0.0351652	0.310248	0.934367	HCT116_CD44std_vs_Parental
56	HALLMARK_APICAL_SURFACE	0.540712	0.844863	0.0531298	0.3764	0.955846	HCT116_CD44std_vs_Parental
57	HALLMARK_APOPTOSIS	0.180645	0.440693	0.101714	0.392376	1.16022	HCT116_CD44std_vs_Parental
58	HALLMARK_BILE_ACID_METABOLISM	0.682274	0.91351	0.0363783	0.316491	0.903137	HCT116_CD44std_vs_Parental
59	HALLMARK_CHOLESTEROL_HOMEOSTASIS	0.29405	0.668296	0.0776799	0.403557	1.11516	HCT116_CD44std_vs_Parental
60	HALLMARK_COAGULATION	5.20373e-07	3.71695e-06	0.659444	0.619826	1.79435	HCT116_CD44std_vs_Parental
61	HALLMARK_COMPLEMENT	0.00166893	0.00521542	0.45506	0.489829	1.46593	HCT116_CD44std_vs_Parental
62	HALLMARK_DNA_REPAIR	0.185091	0.440693	0.249247	-0.29027	-1.07467	HCT116_CD44std_vs_Parental
63	HALLMARK_E2F_TARGETS	1e-10	1.25e-09	#N/A	-0.544722	-2.12824	HCT116_CD44std_vs_Parental
64	HALLMARK_EPITHELIAL_MESENCHYMAL_TRANSITION	5.87466e-05	0.00026703	0.557332	0.532072	1.59005	HCT116_CD44std_vs_Parental
65	HALLMARK_ESTROGEN_RESPONSE_EARLY	1	1	0.010461	0.180263	0.541924	HCT116_CD44std_vs_Parental
66	HALLMARK_ESTROGEN_RESPONSE_LATE	0.903158	1	0.0186259	0.263263	0.791315	HCT116_CD44std_vs_Parental
67	HALLMARK_FATTY_ACID_METABOLISM	1	1	0.012984	0.17117	0.504175	HCT116_CD44std_vs_Parental
68	HALLMARK_G2M_CHECKPOINT	7.77417e-06	4.31898e-05	0.593325	-0.422538	-1.64238	HCT116_CD44std_vs_Parental
69	HALLMARK_GLYCOLYSIS	1	1	0.0107873	0.187203	0.562016	HCT116_CD44std_vs_Parental
70	HALLMARK_HEDGEHOG_SIGNALING	0.833333	1	0.0928481	-0.273475	-0.806448	HCT116_CD44std_vs_Parental
71	HALLMARK_HEME_METABOLISM	0.674788	0.91351	0.0344919	0.309986	0.927708	HCT116_CD44std_vs_Parental
72	HALLMARK_HYPOXIA	0.472076	0.792011	0.0507028	0.337312	1.0134	HCT116_CD44std_vs_Parental
73	HALLMARK_IL2_STAT5_SIGNALING	0.0272823	0.0757841	0.282013	0.424323	1.27792	HCT116_CD44std_vs_Parental
74	HALLMARK_IL6_JAK_STAT3_SIGNALING	0.00101458	0.00338193	0.45506	0.582017	1.61296	HCT116_CD44std_vs_Parental
75	HALLMARK_INFLAMMATORY_RESPONSE	2.2136e-08	2.20431e-07	0.733762	0.595513	1.78064	HCT116_CD44std_vs_Parental
76	HALLMARK_INTERFERON_ALPHA_RESPONSE	1e-10	1.25e-09	#N/A	0.74887	2.1066	HCT116_CD44std_vs_Parental
77	HALLMARK_INTERFERON_GAMMA_RESPONSE	1e-10	1.25e-09	#N/A	0.692312	2.0728	HCT116_CD44std_vs_Parental
78	HALLMARK_KRAS_SIGNALING_DN	0.00010711	0.000446291	0.538434	0.531037	1.57403	HCT116_CD44std_vs_Parental
79	HALLMARK_KRAS_SIGNALING_UP	4.30572e-05	0.000215286	0.557332	0.531962	1.59062	HCT116_CD44std_vs_Parental
80	HALLMARK_MITOTIC_SPINDLE	1	1	0.197822	-0.113123	-0.441973	HCT116_CD44std_vs_Parental
81	HALLMARK_MTORC1_SIGNALING	0.409768	0.792011	0.203509	-0.263856	-1.02559	HCT116_CD44std_vs_Parental
82	HALLMARK_MYC_TARGETS_V1	1e-10	1.25e-09	#N/A	-0.607814	-2.37003	HCT116_CD44std_vs_Parental
83	HALLMARK_MYC_TARGETS_V2	2.38677e-06	1.49173e-05	0.627257	-0.67366	-2.19463	HCT116_CD44std_vs_Parental
84	HALLMARK_MYOGENESIS	0.443856	0.792011	0.0537873	0.341807	1.02294	HCT116_CD44std_vs_Parental
85	HALLMARK_NOTCH_SIGNALING	0.475207	0.792011	0.126876	-0.335906	-0.956654	HCT116_CD44std_vs_Parental
86	HALLMARK_OXIDATIVE_PHOSPHORYLATION	0.000170123	0.00065432	0.518848	-0.390354	-1.51751	HCT116_CD44std_vs_Parental
87	HALLMARK_P53_PATHWAY	0.995789	1	0.0110006	0.22071	0.66341	HCT116_CD44std_vs_Parental
88	HALLMARK_PANCREAS_BETA_CELLS	0.683871	0.91351	0.0430173	0.350576	0.863191	HCT116_CD44std_vs_Parental
89	HALLMARK_PEROXISOME	0.893855	1	0.0228694	0.269447	0.76287	HCT116_CD44std_vs_Parental
90	HALLMARK_PI3K_AKT_MTOR_SIGNALING	0.607143	0.91351	0.0418239	0.330607	0.938109	HCT116_CD44std_vs_Parental
91	HALLMARK_PROTEIN_SECRETION	0.392334	0.792011	0.0625237	0.371194	1.04596	HCT116_CD44std_vs_Parental
92	HALLMARK_REACTIVE_OXIGEN_SPECIES_PATHWAY	0.861728	1	0.0300618	0.296922	0.76779	HCT116_CD44std_vs_Parental
93	HALLMARK_SPERMATOGENESIS	0.434687	0.792011	0.0564118	0.352271	1.01807	HCT116_CD44std_vs_Parental
94	HALLMARK_TGF_BETA_SIGNALING	0.835947	1	0.0304181	0.291343	0.766698	HCT116_CD44std_vs_Parental
95	HALLMARK_TNFA_SIGNALING_VIA_NFKB	2.64517e-08	2.20431e-07	0.733762	0.591694	1.77691	HCT116_CD44std_vs_Parental
96	HALLMARK_UNFOLDED_PROTEIN_RESPONSE	0.0174705	0.0513837	0.352488	-0.372213	-1.34931	HCT116_CD44std_vs_Parental
97	HALLMARK_UV_RESPONSE_DN	0.517915	0.835347	0.04783	0.335313	0.981839	HCT116_CD44std_vs_Parental
98	HALLMARK_UV_RESPONSE_UP	0.443011	0.792011	0.0545681	0.346211	1.02275	HCT116_CD44std_vs_Parental
99	HALLMARK_WNT_BETA_CATENIN_SIGNALING	0.39719	0.792011	0.0679923	0.415218	1.05464	HCT116_CD44std_vs_Parental
100	HALLMARK_XENOBIOTIC_METABOLISM	0.694268	0.91351	0.0332359	0.307178	0.917976	HCT116_CD44std_vs_Parental
101	HALLMARK_ADIPOGENESIS	0.922162	1	0.0190042	0.281646	0.786656	HCT116_CD44v6_vs_Parental
102	HALLMARK_ALLOGRAFT_REJECTION	0.000362619	0.00258611	0.498493	0.545874	1.51523	HCT116_CD44v6_vs_Parental
103	HALLMARK_ANDROGEN_RESPONSE	1	1	0.0195288	0.199233	0.528904	HCT116_CD44v6_vs_Parental
104	HALLMARK_ANGIOGENESIS	0.726241	1	0.0445962	0.377104	0.83696	HCT116_CD44v6_vs_Parental
105	HALLMARK_APICAL_JUNCTION	0.223291	0.500588	0.0888945	0.398464	1.11776	HCT116_CD44v6_vs_Parental
106	HALLMARK_APICAL_SURFACE	0.722667	1	0.0419926	0.359361	0.855323	HCT116_CD44v6_vs_Parental
107	HALLMARK_APOPTOSIS	0.108768	0.27192	0.138805	0.437841	1.21023	HCT116_CD44v6_vs_Parental
108	HALLMARK_BILE_ACID_METABOLISM	0.0631579	0.174194	0.191892	0.486561	1.29885	HCT116_CD44v6_vs_Parental
109	HALLMARK_CHOLESTEROL_HOMEOSTASIS	0.789926	1	0.0340464	0.320793	0.826719	HCT116_CD44v6_vs_Parental
110	HALLMARK_COAGULATION	0.00679411	0.0261312	0.407018	0.528578	1.43583	HCT116_CD44v6_vs_Parental
111	HALLMARK_COMPLEMENT	0.00828479	0.0295885	0.38073	0.490494	1.37359	HCT116_CD44v6_vs_Parental
112	HALLMARK_DNA_REPAIR	0.990909	1	0.130777	-0.239779	-0.813661	HCT116_CD44v6_vs_Parental
113	HALLMARK_E2F_TARGETS	2.36188e-09	2.95235e-08	0.774939	-0.553712	-1.91849	HCT116_CD44v6_vs_Parental
114	HALLMARK_EPITHELIAL_MESENCHYMAL_TRANSITION	0.0291892	0.0912162	0.276501	0.467459	1.30565	HCT116_CD44v6_vs_Parental
115	HALLMARK_ESTROGEN_RESPONSE_EARLY	0.988172	1	0.013628	0.246302	0.689284	HCT116_CD44v6_vs_Parental
116	HALLMARK_ESTROGEN_RESPONSE_LATE	0.946121	1	0.0170763	0.271453	0.75858	HCT116_CD44v6_vs_Parental
117	HALLMARK_FATTY_ACID_METABOLISM	0.978795	1	0.0171554	0.254814	0.701402	HCT116_CD44v6_vs_Parental
118	HALLMARK_G2M_CHECKPOINT	0.0280338	0.0912162	0.352488	-0.353014	-1.22477	HCT116_CD44v6_vs_Parental
119	HALLMARK_GLYCOLYSIS	1	1	0.012984	0.199589	0.558243	HCT116_CD44v6_vs_Parental
120	HALLMARK_HEDGEHOG_SIGNALING	0.787349	1	0.0384787	0.341403	0.797354	HCT116_CD44v6_vs_Parental
121	HALLMARK_HEME_METABOLISM	0.812903	1	0.0259736	0.304528	0.852809	HCT116_CD44v6_vs_Parental
122	HALLMARK_HYPOXIA	0.882796	1	0.021363	0.28973	0.810478	HCT116_CD44v6_vs_Parental
123	HALLMARK_IL2_STAT5_SIGNALING	0.0617021	0.174194	0.184706	0.445156	1.2502	HCT116_CD44v6_vs_Parental
124	HALLMARK_IL6_JAK_STAT3_SIGNALING	0.000822914	0.00457174	0.477271	0.619285	1.61195	HCT116_CD44v6_vs_Parental
125	HALLMARK_INFLAMMATORY_RESPONSE	3.18577e-06	2.65481e-05	0.627257	0.593533	1.65639	HCT116_CD44v6_vs_Parental
126	HALLMARK_INTERFERON_ALPHA_RESPONSE	1e-10	2.5e-09	#N/A	0.788983	2.08183	HCT116_CD44v6_vs_Parental
127	HALLMARK_INTERFERON_GAMMA_RESPONSE	1e-10	2.5e-09	#N/A	0.726243	2.03397	HCT116_CD44v6_vs_Parental
128	HALLMARK_KRAS_SIGNALING_DN	0.00294091	0.0133678	0.431708	0.515689	1.43298	HCT116_CD44v6_vs_Parental
129	HALLMARK_KRAS_SIGNALING_UP	0.00123447	0.00617234	0.45506	0.52813	1.47164	HCT116_CD44v6_vs_Parental
130	HALLMARK_MITOTIC_SPINDLE	1	1	0.01251	0.150804	0.422227	HCT116_CD44v6_vs_Parental
131	HALLMARK_MTORC1_SIGNALING	1	1	0.164406	-0.177934	-0.617338	HCT116_CD44v6_vs_Parental
132	HALLMARK_MYC_TARGETS_V1	1.48831e-09	2.48051e-08	0.788187	-0.56821	-1.96958	HCT116_CD44v6_vs_Parental
133	HALLMARK_MYC_TARGETS_V2	0.00426767	0.0177819	0.407018	-0.545844	-1.5973	HCT116_CD44v6_vs_Parental
134	HALLMARK_MYOGENESIS	0.82043	1	0.0254821	0.302309	0.846595	HCT116_CD44v6_vs_Parental
135	HALLMARK_NOTCH_SIGNALING	0.147157	0.350375	0.249247	-0.503636	-1.32349	HCT116_CD44v6_vs_Parental
136	HALLMARK_OXIDATIVE_PHOSPHORYLATION	0.000413777	0.00258611	0.498493	-0.421908	-1.46224	HCT116_CD44v6_vs_Parental
137	HALLMARK_P53_PATHWAY	0.985991	1	0.013987	0.251599	0.703099	HCT116_CD44v6_vs_Parental
138	HALLMARK_PANCREAS_BETA_CELLS	0.527322	1	0.0576091	0.413749	0.95635	HCT116_CD44v6_vs_Parental
139	HALLMARK_PEROXISOME	0.0661939	0.174194	0.188204	0.487539	1.29427	HCT116_CD44v6_vs_Parental
140	HALLMARK_PI3K_AKT_MTOR_SIGNALING	0.832938	1	0.0297065	0.306136	0.814209	HCT116_CD44v6_vs_Parental
141	HALLMARK_PROTEIN_SECRETION	0.772182	1	0.0339724	0.320546	0.842955	HCT116_CD44v6_vs_Parental
142	HALLMARK_REACTIVE_OXIGEN_SPECIES_PATHWAY	0.984496	1	0.0255523	0.245538	0.596781	HCT116_CD44v6_vs_Parental
143	HALLMARK_SPERMATOGENESIS	0.723898	1	0.0354665	0.328514	0.885829	HCT116_CD44v6_vs_Parental
144	HALLMARK_TGF_BETA_SIGNALING	1	1	0.0249197	0.17752	0.438364	HCT116_CD44v6_vs_Parental
145	HALLMARK_TNFA_SIGNALING_VIA_NFKB	8.43809e-09	8.43809e-08	0.74774	0.633271	1.77035	HCT116_CD44v6_vs_Parental
146	HALLMARK_UNFOLDED_PROTEIN_RESPONSE	0.81457	1	0.122108	-0.266011	-0.883054	HCT116_CD44v6_vs_Parental
147	HALLMARK_UV_RESPONSE_DN	0.248036	0.516741	0.0857844	0.403724	1.10731	HCT116_CD44v6_vs_Parental
148	HALLMARK_UV_RESPONSE_UP	0.392027	0.784053	0.0617054	0.376138	1.03898	HCT116_CD44v6_vs_Parental
149	HALLMARK_WNT_BETA_CATENIN_SIGNALING	0.989376	1	0.0267457	0.227986	0.543117	HCT116_CD44v6_vs_Parental
150	HALLMARK_XENOBIOTIC_METABOLISM	0.23027	0.500588	0.0878313	0.398884	1.11411	HCT116_CD44v6_vs_Parental
151	HALLMARK_ADIPOGENESIS	1	1	0.0385579	-0.15198	-0.495518	SW480_CD44std_vs_CD44v6
152	HALLMARK_ALLOGRAFT_REJECTION	0.409836	1	0.0992333	0.305201	1.01324	SW480_CD44std_vs_CD44v6
153	HALLMARK_ANDROGEN_RESPONSE	0.950459	1	0.044064	-0.251397	-0.759372	SW480_CD44std_vs_CD44v6
154	HALLMARK_ANGIOGENESIS	0.548729	1	0.0772747	0.369265	0.937913	SW480_CD44std_vs_CD44v6
155	HALLMARK_APICAL_JUNCTION	0.0732538	0.523242	0.216543	-0.371193	-1.21868	SW480_CD44std_vs_CD44v6
156	HALLMARK_APICAL_SURFACE	0.178908	0.813217	0.141225	-0.46585	-1.21275	SW480_CD44std_vs_CD44v6
157	HALLMARK_APOPTOSIS	0.980836	1	0.0402478	-0.240543	-0.769713	SW480_CD44std_vs_CD44v6
158	HALLMARK_BILE_ACID_METABOLISM	0.992661	1	0.0420772	-0.224115	-0.68322	SW480_CD44std_vs_CD44v6
159	HALLMARK_CHOLESTEROL_HOMEOSTASIS	0.917595	1	0.0545681	0.258228	0.764397	SW480_CD44std_vs_CD44v6
160	HALLMARK_COAGULATION	0.744493	1	0.0639272	0.281736	0.890575	SW480_CD44std_vs_CD44v6
161	HALLMARK_COMPLEMENT	0.885077	1	0.0442407	-0.263624	-0.857547	SW480_CD44std_vs_CD44v6
162	HALLMARK_DNA_REPAIR	0.349425	1	0.107972	0.321386	1.04285	SW480_CD44std_vs_CD44v6
163	HALLMARK_E2F_TARGETS	0.27619	1	0.126254	0.315651	1.06905	SW480_CD44std_vs_CD44v6
164	HALLMARK_EPITHELIAL_MESENCHYMAL_TRANSITION	0.00581368	0.145342	0.407018	0.419719	1.41324	SW480_CD44std_vs_CD44v6
165	HALLMARK_ESTROGEN_RESPONSE_EARLY	0.0204361	0.23737	0.352488	-0.398751	-1.30601	SW480_CD44std_vs_CD44v6
166	HALLMARK_ESTROGEN_RESPONSE_LATE	0.023737	0.23737	0.352488	-0.402885	-1.31817	SW480_CD44std_vs_CD44v6
167	HALLMARK_FATTY_ACID_METABOLISM	0.759582	1	0.0519512	-0.277924	-0.889328	SW480_CD44std_vs_CD44v6
168	HALLMARK_G2M_CHECKPOINT	1	1	0.053677	0.190824	0.645543	SW480_CD44std_vs_CD44v6
169	HALLMARK_GLYCOLYSIS	0.746479	1	0.0532386	-0.277355	-0.901554	SW480_CD44std_vs_CD44v6
170	HALLMARK_HEDGEHOG_SIGNALING	0.402235	1	0.0870516	-0.409281	-1.03857	SW480_CD44std_vs_CD44v6
171	HALLMARK_HEME_METABOLISM	1	1	0.0390355	-0.19305	-0.629006	SW480_CD44std_vs_CD44v6
172	HALLMARK_HYPOXIA	0.902062	1	0.0434507	-0.255368	-0.836395	SW480_CD44std_vs_CD44v6
173	HALLMARK_IL2_STAT5_SIGNALING	0.705036	1	0.0707899	0.268701	0.911929	SW480_CD44std_vs_CD44v6
174	HALLMARK_IL6_JAK_STAT3_SIGNALING	0.211191	0.879964	0.12564	-0.390714	-1.15062	SW480_CD44std_vs_CD44v6
175	HALLMARK_INFLAMMATORY_RESPONSE	0.536207	1	0.0679923	-0.297558	-0.967889	SW480_CD44std_vs_CD44v6
176	HALLMARK_INTERFERON_ALPHA_RESPONSE	0.153017	0.765086	0.165657	0.38057	1.16643	SW480_CD44std_vs_CD44v6
177	HALLMARK_INTERFERON_GAMMA_RESPONSE	0.854762	1	0.0610364	0.258358	0.866026	SW480_CD44std_vs_CD44v6
178	HALLMARK_KRAS_SIGNALING_DN	0.345423	1	0.0913924	-0.321269	-1.03374	SW480_CD44std_vs_CD44v6
179	HALLMARK_KRAS_SIGNALING_UP	0.0428816	0.357347	0.287857	-0.393577	-1.28027	SW480_CD44std_vs_CD44v6
180	HALLMARK_MITOTIC_SPINDLE	0.900344	1	0.0435378	-0.256994	-0.841987	SW480_CD44std_vs_CD44v6
181	HALLMARK_MTORC1_SIGNALING	1	1	0.0533478	0.190042	0.643047	SW480_CD44std_vs_CD44v6
182	HALLMARK_MYC_TARGETS_V1	0.00488902	0.145342	0.407018	0.435318	1.44823	SW480_CD44std_vs_CD44v6
183	HALLMARK_MYC_TARGETS_V2	0.589247	1	0.0743625	0.334472	0.929744	SW480_CD44std_vs_CD44v6
184	HALLMARK_MYOGENESIS	0.801887	1	0.0636424	0.260628	0.880446	SW480_CD44std_vs_CD44v6
185	HALLMARK_NOTCH_SIGNALING	0.916981	1	0.0469759	-0.277942	-0.692743	SW480_CD44std_vs_CD44v6
186	HALLMARK_OXIDATIVE_PHOSPHORYLATION	0.0201661	0.23737	0.352488	0.386896	1.30732	SW480_CD44std_vs_CD44v6
187	HALLMARK_P53_PATHWAY	0.717504	1	0.0543434	-0.278504	-0.90858	SW480_CD44std_vs_CD44v6
188	HALLMARK_PANCREAS_BETA_CELLS	0.612903	1	0.0723571	0.345803	0.904049	SW480_CD44std_vs_CD44v6
189	HALLMARK_PEROXISOME	0.982379	1	0.0509083	0.233447	0.723097	SW480_CD44std_vs_CD44v6
190	HALLMARK_PI3K_AKT_MTOR_SIGNALING	1	1	0.0428451	-0.17928	-0.541962	SW480_CD44std_vs_CD44v6
191	HALLMARK_PROTEIN_SECRETION	0.821121	1	0.0582216	0.276483	0.84741	SW480_CD44std_vs_CD44v6
192	HALLMARK_REACTIVE_OXIGEN_SPECIES_PATHWAY	0.997877	1	0.048506	0.217914	0.598552	SW480_CD44std_vs_CD44v6
193	HALLMARK_SPERMATOGENESIS	0.537445	1	0.08042	0.303419	0.959114	SW480_CD44std_vs_CD44v6
194	HALLMARK_TGF_BETA_SIGNALING	0.127341	0.707449	0.169571	-0.460412	-1.2591	SW480_CD44std_vs_CD44v6
195	HALLMARK_TNFA_SIGNALING_VIA_NFKB	0.104452	0.652825	0.179782	-0.362304	-1.18126	SW480_CD44std_vs_CD44v6
196	HALLMARK_UNFOLDED_PROTEIN_RESPONSE	0.726776	1	0.0560596	-0.287303	-0.878888	SW480_CD44std_vs_CD44v6
197	HALLMARK_UV_RESPONSE_DN	0.955908	1	0.0419926	-0.247135	-0.786779	SW480_CD44std_vs_CD44v6
198	HALLMARK_UV_RESPONSE_UP	1	1	0.0393562	-0.155422	-0.496243	SW480_CD44std_vs_CD44v6
199	HALLMARK_WNT_BETA_CATENIN_SIGNALING	0.977401	1	0.0439759	-0.244256	-0.635871	SW480_CD44std_vs_CD44v6
200	HALLMARK_XENOBIOTIC_METABOLISM	0.916667	1	0.0577309	0.249554	0.836516	SW480_CD44std_vs_CD44v6
201	HALLMARK_ADIPOGENESIS	1	1	0.0181675	0.222938	0.674206	SW480_CD44std_vs_Parental
202	HALLMARK_ALLOGRAFT_REJECTION	0.140187	0.46729	0.123842	0.392833	1.18151	SW480_CD44std_vs_Parental
203	HALLMARK_ANDROGEN_RESPONSE	0.470588	0.973039	0.0588438	0.355179	1.0057	SW480_CD44std_vs_Parental
204	HALLMARK_ANGIOGENESIS	0.0058998	0.0737475	0.407018	0.671794	1.59291	SW480_CD44std_vs_Parental
205	HALLMARK_APICAL_JUNCTION	0.876728	1	0.0256225	0.271086	0.823456	SW480_CD44std_vs_Parental
206	HALLMARK_APICAL_SURFACE	0.755627	1	0.0824344	-0.295118	-0.857178	SW480_CD44std_vs_Parental
207	HALLMARK_APOPTOSIS	0.381688	0.954221	0.0664364	0.350409	1.04046	SW480_CD44std_vs_Parental
208	HALLMARK_BILE_ACID_METABOLISM	0.441624	0.973039	0.0625237	0.358435	1.01597	SW480_CD44std_vs_Parental
209	HALLMARK_CHOLESTEROL_HOMEOSTASIS	0.883333	1	0.0880945	-0.254203	-0.827415	SW480_CD44std_vs_Parental
210	HALLMARK_COAGULATION	0.101716	0.431996	0.152145	0.427192	1.24223	SW480_CD44std_vs_Parental
211	HALLMARK_COMPLEMENT	0.60373	1	0.044064	0.312826	0.942011	SW480_CD44std_vs_Parental
212	HALLMARK_DNA_REPAIR	0.795647	1	0.0329431	0.288825	0.852159	SW480_CD44std_vs_Parental
213	HALLMARK_E2F_TARGETS	1	1	0.116739	-0.180788	-0.649684	SW480_CD44std_vs_Parental
214	HALLMARK_EPITHELIAL_MESENCHYMAL_TRANSITION	0.00166054	0.0415134	0.45506	0.490932	1.48523	SW480_CD44std_vs_Parental
215	HALLMARK_ESTROGEN_RESPONSE_EARLY	0.181159	0.566123	0.287857	-0.304476	-1.09979	SW480_CD44std_vs_Parental
216	HALLMARK_ESTROGEN_RESPONSE_LATE	0.403974	0.961842	0.179782	-0.276445	-1.00062	SW480_CD44std_vs_Parental
217	HALLMARK_FATTY_ACID_METABOLISM	0.254459	0.741388	0.0875697	0.376211	1.11708	SW480_CD44std_vs_Parental
218	HALLMARK_G2M_CHECKPOINT	1	1	0.114267	-0.137682	-0.497316	SW480_CD44std_vs_Parental
219	HALLMARK_GLYCOLYSIS	0.64637	1	0.0411544	0.308453	0.932786	SW480_CD44std_vs_Parental
220	HALLMARK_HEDGEHOG_SIGNALING	0.0209859	0.174882	0.352488	-0.535795	-1.50289	SW480_CD44std_vs_Parental
221	HALLMARK_HEME_METABOLISM	0.978009	1	0.0196033	0.244308	0.739439	SW480_CD44std_vs_Parental
222	HALLMARK_HYPOXIA	0.998843	1	0.0182442	0.230171	0.697871	SW480_CD44std_vs_Parental
223	HALLMARK_IL2_STAT5_SIGNALING	0.452244	0.973039	0.0567672	0.333141	1.01261	SW480_CD44std_vs_Parental
224	HALLMARK_IL6_JAK_STAT3_SIGNALING	0.0582147	0.323415	0.2114	0.479726	1.32502	SW480_CD44std_vs_Parental
225	HALLMARK_INFLAMMATORY_RESPONSE	0.000256705	0.0128352	0.498493	0.519467	1.56834	SW480_CD44std_vs_Parental
226	HALLMARK_INTERFERON_ALPHA_RESPONSE	0.00918672	0.0918672	0.38073	0.521246	1.46666	SW480_CD44std_vs_Parental
227	HALLMARK_INTERFERON_GAMMA_RESPONSE	0.0311842	0.194901	0.352488	0.44329	1.33986	SW480_CD44std_vs_Parental
228	HALLMARK_KRAS_SIGNALING_DN	0.590856	1	0.0453152	0.314945	0.943215	SW480_CD44std_vs_Parental
229	HALLMARK_KRAS_SIGNALING_UP	0.2669	0.741388	0.0838361	0.366046	1.10227	SW480_CD44std_vs_Parental
230	HALLMARK_MITOTIC_SPINDLE	1	1	0.116739	-0.219344	-0.788241	SW480_CD44std_vs_Parental
231	HALLMARK_MTORC1_SIGNALING	0.950355	1	0.116234	-0.234807	-0.847974	SW480_CD44std_vs_Parental
232	HALLMARK_MYC_TARGETS_V1	1	1	0.111918	-0.201139	-0.719643	SW480_CD44std_vs_Parental
233	HALLMARK_MYC_TARGETS_V2	0.790441	1	0.0873098	-0.284458	-0.847754	SW480_CD44std_vs_Parental
234	HALLMARK_MYOGENESIS	0.111896	0.431996	0.141225	0.392254	1.18576	SW480_CD44std_vs_Parental
235	HALLMARK_NOTCH_SIGNALING	0.987768	1	0.0661326	-0.228628	-0.619573	SW480_CD44std_vs_Parental
236	HALLMARK_OXIDATIVE_PHOSPHORYLATION	1	1	0.0189288	0.13366	0.404198	SW480_CD44std_vs_Parental
237	HALLMARK_P53_PATHWAY	0.328859	0.865419	0.202072	-0.285878	-1.02897	SW480_CD44std_vs_Parental
238	HALLMARK_PANCREAS_BETA_CELLS	0.136564	0.46729	0.142901	0.527965	1.27344	SW480_CD44std_vs_Parental
239	HALLMARK_PEROXISOME	0.00262218	0.043703	0.431708	0.530753	1.50361	SW480_CD44std_vs_Parental
240	HALLMARK_PI3K_AKT_MTOR_SIGNALING	0.864728	1	0.0310618	0.282256	0.79993	SW480_CD44std_vs_Parental
241	HALLMARK_PROTEIN_SECRETION	0.967089	1	0.0254118	0.248927	0.700421	SW480_CD44std_vs_Parental
242	HALLMARK_REACTIVE_OXIGEN_SPECIES_PATHWAY	0.98324	1	0.0296355	0.243334	0.622693	SW480_CD44std_vs_Parental
243	HALLMARK_SPERMATOGENESIS	0.48652	0.973039	0.0562941	0.341707	0.993647	SW480_CD44std_vs_Parental
244	HALLMARK_TGF_BETA_SIGNALING	0.112319	0.431996	0.257206	-0.399942	-1.21955	SW480_CD44std_vs_Parental
245	HALLMARK_TNFA_SIGNALING_VIA_NFKB	0.813657	1	0.0297065	0.280833	0.849293	SW480_CD44std_vs_Parental
246	HALLMARK_UNFOLDED_PROTEIN_RESPONSE	0.0701729	0.350864	0.287805	-0.357304	-1.22661	SW480_CD44std_vs_Parental
247	HALLMARK_UV_RESPONSE_DN	0.932854	1	0.0244269	0.260776	0.77178	SW480_CD44std_vs_Parental
248	HALLMARK_UV_RESPONSE_UP	0.881437	1	0.0273777	0.269529	0.800306	SW480_CD44std_vs_Parental
249	HALLMARK_WNT_BETA_CATENIN_SIGNALING	0.916399	1	0.0723571	-0.265949	-0.772457	SW480_CD44std_vs_Parental
250	HALLMARK_XENOBIOTIC_METABOLISM	0.0280484	0.194901	0.352488	0.445322	1.346	SW480_CD44std_vs_Parental
251	HALLMARK_ADIPOGENESIS	0.98831	1	0.0126058	0.259329	0.713754	SW480_CD44v6_vs_Parental
252	HALLMARK_ALLOGRAFT_REJECTION	0.262366	0.601391	0.08042	0.399319	1.09175	SW480_CD44v6_vs_Parental
253	HALLMARK_ANDROGEN_RESPONSE	0.357871	0.715742	0.0672065	0.408614	1.07012	SW480_CD44v6_vs_Parental
254	HALLMARK_ANGIOGENESIS	0.0651872	0.314368	0.206588	0.612413	1.37407	SW480_CD44v6_vs_Parental
255	HALLMARK_APICAL_JUNCTION	0.222574	0.556435	0.0883594	0.404795	1.11887	SW480_CD44v6_vs_Parental
256	HALLMARK_APICAL_SURFACE	0.498677	0.804318	0.0587186	0.422273	0.985081	SW480_CD44v6_vs_Parental
257	HALLMARK_APOPTOSIS	0.293926	0.625	0.0749279	0.399345	1.08634	SW480_CD44v6_vs_Parental
258	HALLMARK_BILE_ACID_METABOLISM	0.468997	0.781661	0.0541201	0.385858	1.01131	SW480_CD44v6_vs_Parental
259	HALLMARK_CHOLESTEROL_HOMEOSTASIS	0.394595	0.730731	0.16318	-0.31829	-1.01295	SW480_CD44v6_vs_Parental
260	HALLMARK_COAGULATION	0.123884	0.364364	0.129443	0.456319	1.20974	SW480_CD44v6_vs_Parental
261	HALLMARK_COMPLEMENT	0.3	0.625	0.0734381	0.392568	1.07418	SW480_CD44v6_vs_Parental
262	HALLMARK_DNA_REPAIR	0.920705	1	0.0202691	0.290927	0.783989	SW480_CD44v6_vs_Parental
263	HALLMARK_E2F_TARGETS	0.108331	0.364364	0.287805	-0.329349	-1.13662	SW480_CD44v6_vs_Parental
264	HALLMARK_EPITHELIAL_MESENCHYMAL_TRANSITION	0.16649	0.438131	0.10592	0.417362	1.15021	SW480_CD44v6_vs_Parental
265	HALLMARK_ESTROGEN_RESPONSE_EARLY	0.782241	1	0.0270967	0.316931	0.874891	SW480_CD44v6_vs_Parental
266	HALLMARK_ESTROGEN_RESPONSE_LATE	0.421444	0.752578	0.0562941	0.372106	1.02556	SW480_CD44v6_vs_Parental
267	HALLMARK_FATTY_ACID_METABOLISM	0.0520607	0.314368	0.204295	0.466475	1.26896	SW480_CD44v6_vs_Parental
268	HALLMARK_G2M_CHECKPOINT	0.875	1	0.202072	-0.262311	-0.905702	SW480_CD44v6_vs_Parental
269	HALLMARK_GLYCOLYSIS	0.383475	0.730731	0.0606404	0.379698	1.04753	SW480_CD44v6_vs_Parental
270	HALLMARK_HEDGEHOG_SIGNALING	0.0568731	0.314368	0.321776	-0.509708	-1.37829	SW480_CD44v6_vs_Parental
271	HALLMARK_HEME_METABOLISM	0.874066	1	0.0215076	0.299851	0.82497	SW480_CD44v6_vs_Parental
272	HALLMARK_HYPOXIA	0.904863	1	0.0187776	0.292003	0.806076	SW480_CD44v6_vs_Parental
273	HALLMARK_IL2_STAT5_SIGNALING	0.637224	0.995662	0.036839	0.337835	0.935388	SW480_CD44v6_vs_Parental
274	HALLMARK_IL6_JAK_STAT3_SIGNALING	0.000526736	0.00877893	0.477271	0.620417	1.58847	SW480_CD44v6_vs_Parental
275	HALLMARK_INFLAMMATORY_RESPONSE	2.84596e-05	0.00071149	0.57561	0.57815	1.58704	SW480_CD44v6_vs_Parental
276	HALLMARK_INTERFERON_ALPHA_RESPONSE	0.069161	0.314368	0.179782	0.494321	1.29248	SW480_CD44v6_vs_Parental
277	HALLMARK_INTERFERON_GAMMA_RESPONSE	0.0520723	0.314368	0.202072	0.452931	1.24565	SW480_CD44v6_vs_Parental
278	HALLMARK_KRAS_SIGNALING_DN	0.46738	0.781661	0.0518458	0.367144	1.00527	SW480_CD44v6_vs_Parental
279	HALLMARK_KRAS_SIGNALING_UP	0.0169747	0.169747	0.352488	0.490244	1.34145	SW480_CD44v6_vs_Parental
280	HALLMARK_MITOTIC_SPINDLE	1	1	0.188204	-0.155785	-0.537632	SW480_CD44v6_vs_Parental
281	HALLMARK_MTORC1_SIGNALING	0.122563	0.364364	0.287805	-0.326387	-1.1263	SW480_CD44v6_vs_Parental
282	HALLMARK_MYC_TARGETS_V1	1.63295e-06	8.16474e-05	0.643552	-0.500644	-1.71565	SW480_CD44v6_vs_Parental
283	HALLMARK_MYC_TARGETS_V2	0.00852791	0.106599	0.38073	-0.518948	-1.54139	SW480_CD44v6_vs_Parental
284	HALLMARK_MYOGENESIS	0.0984127	0.364364	0.142901	0.435074	1.20016	SW480_CD44v6_vs_Parental
285	HALLMARK_NOTCH_SIGNALING	0.938974	1	0.0315649	0.297606	0.667737	SW480_CD44v6_vs_Parental
286	HALLMARK_OXIDATIVE_PHOSPHORYLATION	0.135422	0.376171	0.249247	-0.333036	-1.14506	SW480_CD44v6_vs_Parental
287	HALLMARK_P53_PATHWAY	1	1	0.186433	-0.175941	-0.605399	SW480_CD44v6_vs_Parental
288	HALLMARK_PANCREAS_BETA_CELLS	0.0857143	0.357143	0.176694	0.579428	1.31886	SW480_CD44v6_vs_Parental
289	HALLMARK_PEROXISOME	0.0306122	0.255102	0.276501	0.512295	1.34141	SW480_CD44v6_vs_Parental
290	HALLMARK_PI3K_AKT_MTOR_SIGNALING	0.850225	1	0.0260438	0.307166	0.804634	SW480_CD44v6_vs_Parental
291	HALLMARK_PROTEIN_SECRETION	1	1	0.0167582	0.153204	0.400574	SW480_CD44v6_vs_Parental
292	HALLMARK_REACTIVE_OXIGEN_SPECIES_PATHWAY	0.997375	1	0.0256927	0.19781	0.467632	SW480_CD44v6_vs_Parental
293	HALLMARK_SPERMATOGENESIS	0.78683	1	0.0295645	0.320474	0.8496	SW480_CD44v6_vs_Parental
294	HALLMARK_TGF_BETA_SIGNALING	0.997416	1	0.0248494	0.227727	0.551558	SW480_CD44v6_vs_Parental
295	HALLMARK_TNFA_SIGNALING_VIA_NFKB	0.264612	0.601391	0.0793435	0.396586	1.09153	SW480_CD44v6_vs_Parental
296	HALLMARK_UNFOLDED_PROTEIN_RESPONSE	0.756757	1	0.151149	-0.280613	-0.908318	SW480_CD44v6_vs_Parental
297	HALLMARK_UV_RESPONSE_DN	0.860898	1	0.0238623	0.304298	0.823093	SW480_CD44v6_vs_Parental
298	HALLMARK_UV_RESPONSE_UP	0.994547	1	0.0142522	0.2461	0.667685	SW480_CD44v6_vs_Parental
299	HALLMARK_WNT_BETA_CATENIN_SIGNALING	1	1	0.0259736	0.152815	0.356488	SW480_CD44v6_vs_Parental
300	HALLMARK_XENOBIOTIC_METABOLISM	0.12221	0.364364	0.126876	0.429405	1.18095	SW480_CD44v6_vs_Parental
301	HALLMARK_ADIPOGENESIS	1	1	0.0444181	0.139038	0.472147	Both_CD44std_vs_CD44v6
302	HALLMARK_ALLOGRAFT_REJECTION	0.384466	1	0.0919686	0.30368	1.02795	Both_CD44std_vs_CD44v6
303	HALLMARK_ANDROGEN_RESPONSE	0.317554	1	0.104344	-0.336437	-1.05945	Both_CD44std_vs_CD44v6
304	HALLMARK_ANGIOGENESIS	0.194499	1	0.138022	0.462503	1.19655	Both_CD44std_vs_CD44v6
305	HALLMARK_APICAL_JUNCTION	0.240557	1	0.123257	-0.310264	-1.07484	Both_CD44std_vs_CD44v6
306	HALLMARK_APICAL_SURFACE	0.295858	1	0.10882	-0.407703	-1.09623	Both_CD44std_vs_CD44v6
307	HALLMARK_APOPTOSIS	1	1	0.0461379	-0.196854	-0.659257	Both_CD44std_vs_CD44v6
308	HALLMARK_BILE_ACID_METABOLISM	0.247423	1	0.123842	-0.351486	-1.11312	Both_CD44std_vs_CD44v6
309	HALLMARK_CHOLESTEROL_HOMEOSTASIS	0.694882	1	0.0618406	0.299342	0.894062	Both_CD44std_vs_CD44v6
310	HALLMARK_COAGULATION	0.0175925	0.293209	0.352488	0.427554	1.375	Both_CD44std_vs_CD44v6
311	HALLMARK_COMPLEMENT	0.619883	1	0.0668966	0.279112	0.948398	Both_CD44std_vs_CD44v6
312	HALLMARK_DNA_REPAIR	1	1	0.0437126	0.197931	0.647867	Both_CD44std_vs_CD44v6
313	HALLMARK_E2F_TARGETS	1	1	0.0444181	0.154986	0.529429	Both_CD44std_vs_CD44v6
314	HALLMARK_EPITHELIAL_MESENCHYMAL_TRANSITION	0.00834328	0.208582	0.38073	0.40575	1.3787	Both_CD44std_vs_CD44v6
315	HALLMARK_ESTROGEN_RESPONSE_EARLY	0.192385	1	0.140406	-0.318648	-1.10128	Both_CD44std_vs_CD44v6
316	HALLMARK_ESTROGEN_RESPONSE_LATE	0.504098	1	0.0799859	-0.284771	-0.97959	Both_CD44std_vs_CD44v6
317	HALLMARK_FATTY_ACID_METABOLISM	0.742972	1	0.0596037	-0.268567	-0.894707	Both_CD44std_vs_CD44v6
318	HALLMARK_G2M_CHECKPOINT	1	1	0.0441523	0.114238	0.389725	Both_CD44std_vs_CD44v6
319	HALLMARK_GLYCOLYSIS	1	1	0.0467883	-0.20106	-0.691574	Both_CD44std_vs_CD44v6
320	HALLMARK_HEDGEHOG_SIGNALING	0.727092	1	0.0602484	-0.324214	-0.839291	Both_CD44std_vs_CD44v6
321	HALLMARK_HEME_METABOLISM	1	1	0.0467883	-0.196208	-0.675002	Both_CD44std_vs_CD44v6
322	HALLMARK_HYPOXIA	0.976654	1	0.0454968	0.23158	0.791074	Both_CD44std_vs_CD44v6
323	HALLMARK_IL2_STAT5_SIGNALING	0.849802	1	0.0525899	-0.251121	-0.873578	Both_CD44std_vs_CD44v6
324	HALLMARK_IL6_JAK_STAT3_SIGNALING	0.0293437	0.366796	0.352488	-0.453702	-1.38477	Both_CD44std_vs_CD44v6
325	HALLMARK_INFLAMMATORY_RESPONSE	0.484436	1	0.0793435	0.290498	0.990185	Both_CD44std_vs_CD44v6
326	HALLMARK_INTERFERON_ALPHA_RESPONSE	0.0024581	0.122905	0.431708	-0.493497	-1.54401	Both_CD44std_vs_CD44v6
327	HALLMARK_INTERFERON_GAMMA_RESPONSE	0.0881148	0.73429	0.216543	-0.3508	-1.20663	Both_CD44std_vs_CD44v6
328	HALLMARK_KRAS_SIGNALING_DN	0.618557	1	0.0697793	-0.277164	-0.940414	Both_CD44std_vs_CD44v6
329	HALLMARK_KRAS_SIGNALING_UP	0.28866	1	0.113313	-0.309989	-1.06065	Both_CD44std_vs_CD44v6
330	HALLMARK_MITOTIC_SPINDLE	1	1	0.0467883	-0.142163	-0.489032	Both_CD44std_vs_CD44v6
331	HALLMARK_MTORC1_SIGNALING	1	1	0.04707	-0.148537	-0.51065	Both_CD44std_vs_CD44v6
332	HALLMARK_MYC_TARGETS_V1	1	1	0.0464155	-0.187209	-0.636756	Both_CD44std_vs_CD44v6
333	HALLMARK_MYC_TARGETS_V2	0.707171	1	0.0615707	-0.314547	-0.873782	Both_CD44std_vs_CD44v6
334	HALLMARK_MYOGENESIS	0.439689	1	0.0845557	0.29609	1.00924	Both_CD44std_vs_CD44v6
335	HALLMARK_NOTCH_SIGNALING	0.97446	1	0.0460458	0.234179	0.605851	Both_CD44std_vs_CD44v6
336	HALLMARK_OXIDATIVE_PHOSPHORYLATION	0.925926	1	0.048022	0.247717	0.84201	Both_CD44std_vs_CD44v6
337	HALLMARK_P53_PATHWAY	0.94877	1	0.0491928	-0.241142	-0.829583	Both_CD44std_vs_CD44v6
338	HALLMARK_PANCREAS_BETA_CELLS	0.565657	1	0.0732559	-0.359254	-0.942856	Both_CD44std_vs_CD44v6
339	HALLMARK_PEROXISOME	1	1	0.0450443	-0.18651	-0.587327	Both_CD44std_vs_CD44v6
340	HALLMARK_PI3K_AKT_MTOR_SIGNALING	0.989919	1	0.0465084	-0.226504	-0.717935	Both_CD44std_vs_CD44v6
341	HALLMARK_PROTEIN_SECRETION	1	1	0.0451344	0.175328	0.540997	Both_CD44std_vs_CD44v6
342	HALLMARK_REACTIVE_OXIGEN_SPECIES_PATHWAY	0.803922	1	0.054794	0.289113	0.804737	Both_CD44std_vs_CD44v6
343	HALLMARK_SPERMATOGENESIS	0.539806	1	0.0736213	0.302149	0.970647	Both_CD44std_vs_CD44v6
344	HALLMARK_TGF_BETA_SIGNALING	1	1	0.0452247	-0.149339	-0.422119	Both_CD44std_vs_CD44v6
345	HALLMARK_TNFA_SIGNALING_VIA_NFKB	0.0860656	0.73429	0.21925	-0.347767	-1.19624	Both_CD44std_vs_CD44v6
346	HALLMARK_UNFOLDED_PROTEIN_RESPONSE	0.656504	1	0.0661326	-0.289444	-0.917427	Both_CD44std_vs_CD44v6
347	HALLMARK_UV_RESPONSE_DN	0.715152	1	0.0617054	-0.274165	-0.905623	Both_CD44std_vs_CD44v6
348	HALLMARK_UV_RESPONSE_UP	0.982143	1	0.0461379	0.224871	0.741333	Both_CD44std_vs_CD44v6
349	HALLMARK_WNT_BETA_CATENIN_SIGNALING	0.990099	1	0.045679	-0.209048	-0.557886	Both_CD44std_vs_CD44v6
350	HALLMARK_XENOBIOTIC_METABOLISM	0.641393	1	0.067676	-0.272999	-0.939018	Both_CD44std_vs_CD44v6
351	HALLMARK_ADIPOGENESIS	0.841885	1	0.0225843	0.270581	0.832689	Both_CD44std_vs_Parental
352	HALLMARK_ALLOGRAFT_REJECTION	0.0118524	0.0395081	0.38073	0.446679	1.37343	Both_CD44std_vs_Parental
353	HALLMARK_ANDROGEN_RESPONSE	1	1	0.132846	-0.191863	-0.712283	Both_CD44std_vs_Parental
354	HALLMARK_ANGIOGENESIS	0.0221757	0.0692991	0.352488	0.604228	1.47685	Both_CD44std_vs_Parental
355	HALLMARK_APICAL_JUNCTION	0.801463	1	0.025201	0.278658	0.859712	Both_CD44std_vs_Parental
356	HALLMARK_APICAL_SURFACE	0.143478	0.286957	0.248911	-0.370301	-1.20383	Both_CD44std_vs_Parental
357	HALLMARK_APOPTOSIS	0.0587607	0.163224	0.190023	0.422599	1.28863	Both_CD44std_vs_Parental
358	HALLMARK_BILE_ACID_METABOLISM	0.350838	0.674688	0.0675189	0.361266	1.0581	Both_CD44std_vs_Parental
359	HALLMARK_CHOLESTEROL_HOMEOSTASIS	0.903037	1	0.024779	0.265879	0.748069	Both_CD44std_vs_Parental
360	HALLMARK_COAGULATION	8.24791e-06	5.89137e-05	0.593325	0.582476	1.73308	Both_CD44std_vs_Parental
361	HALLMARK_COMPLEMENT	0.0103635	0.0395081	0.38073	0.442556	1.36488	Both_CD44std_vs_Parental
362	HALLMARK_DNA_REPAIR	1	1	0.16318	-0.140483	-0.545485	Both_CD44std_vs_Parental
363	HALLMARK_E2F_TARGETS	6.14327e-06	5.1194e-05	0.610527	-0.411915	-1.61891	Both_CD44std_vs_Parental
364	HALLMARK_EPITHELIAL_MESENCHYMAL_TRANSITION	5.87458e-06	5.1194e-05	0.610527	0.539284	1.6632	Both_CD44std_vs_Parental
365	HALLMARK_ESTROGEN_RESPONSE_EARLY	1	1	0.2114	-0.209791	-0.837498	Both_CD44std_vs_Parental
366	HALLMARK_ESTROGEN_RESPONSE_LATE	0.641026	1	0.287857	-0.242827	-0.954361	Both_CD44std_vs_Parental
367	HALLMARK_FATTY_ACID_METABOLISM	0.973291	1	0.0143399	0.235041	0.714986	Both_CD44std_vs_Parental
368	HALLMARK_G2M_CHECKPOINT	0.00739853	0.0308272	0.407018	-0.335534	-1.32431	Both_CD44std_vs_Parental
369	HALLMARK_GLYCOLYSIS	1	1	0.0097825	0.166415	0.512616	Both_CD44std_vs_Parental
370	HALLMARK_HEDGEHOG_SIGNALING	0.0887822	0.211386	0.287805	-0.436547	-1.3465	Both_CD44std_vs_Parental
371	HALLMARK_HEME_METABOLISM	0.994775	1	0.0103505	0.216728	0.667845	Both_CD44std_vs_Parental
372	HALLMARK_HYPOXIA	0.845275	1	0.0218679	0.267892	0.827881	Both_CD44std_vs_Parental
373	HALLMARK_IL2_STAT5_SIGNALING	0.107404	0.233486	0.135002	0.385494	1.18968	Both_CD44std_vs_Parental
374	HALLMARK_IL6_JAK_STAT3_SIGNALING	0.000852224	0.00426112	0.477271	0.571052	1.62148	Both_CD44std_vs_Parental
375	HALLMARK_INFLAMMATORY_RESPONSE	5.74113e-09	7.17642e-08	0.761461	0.595882	1.83694	Both_CD44std_vs_Parental
376	HALLMARK_INTERFERON_ALPHA_RESPONSE	3.46039e-12	8.65098e-11	0.898671	0.739391	2.14262	Both_CD44std_vs_Parental
377	HALLMARK_INTERFERON_GAMMA_RESPONSE	1.9509e-15	9.75449e-14	1.00732	0.674537	2.07781	Both_CD44std_vs_Parental
378	HALLMARK_KRAS_SIGNALING_DN	0.0875527	0.211386	0.152145	0.401124	1.2315	Both_CD44std_vs_Parental
379	HALLMARK_KRAS_SIGNALING_UP	0.0011264	0.00511999	0.45506	0.485435	1.49487	Both_CD44std_vs_Parental
380	HALLMARK_MITOTIC_SPINDLE	1	1	0.227987	-0.123087	-0.483758	Both_CD44std_vs_Parental
381	HALLMARK_MTORC1_SIGNALING	0.0312354	0.0918688	0.352488	-0.315614	-1.24569	Both_CD44std_vs_Parental
382	HALLMARK_MYC_TARGETS_V1	4.2239e-11	7.03984e-10	0.851339	-0.539589	-2.13077	Both_CD44std_vs_Parental
383	HALLMARK_MYC_TARGETS_V2	0.000212541	0.00132838	0.518848	-0.582519	-1.91085	Both_CD44std_vs_Parental
384	HALLMARK_MYOGENESIS	0.0741127	0.195034	0.165657	0.399689	1.23214	Both_CD44std_vs_Parental
385	HALLMARK_NOTCH_SIGNALING	0.988593	1	0.0770737	-0.197726	-0.599219	Both_CD44std_vs_Parental
386	HALLMARK_OXIDATIVE_PHOSPHORYLATION	0.509127	0.909156	0.143903	-0.253555	-1.01044	Both_CD44std_vs_Parental
387	HALLMARK_P53_PATHWAY	1	1	0.2114	-0.20987	-0.833468	Both_CD44std_vs_Parental
388	HALLMARK_PANCREAS_BETA_CELLS	0.104922	0.233486	0.154191	0.51658	1.31967	Both_CD44std_vs_Parental
389	HALLMARK_PEROXISOME	0.379464	0.702712	0.0636424	0.359574	1.0501	Both_CD44std_vs_Parental
390	HALLMARK_PI3K_AKT_MTOR_SIGNALING	0.955357	1	0.0187776	0.246064	0.7204	Both_CD44std_vs_Parental
391	HALLMARK_PROTEIN_SECRETION	1	1	0.0166782	0.199029	0.574572	Both_CD44std_vs_Parental
392	HALLMARK_REACTIVE_OXIGEN_SPECIES_PATHWAY	0.574121	0.989863	0.0497903	0.355733	0.939409	Both_CD44std_vs_Parental
393	HALLMARK_SPERMATOGENESIS	0.597403	0.995671	0.0411544	0.315053	0.939882	Both_CD44std_vs_Parental
394	HALLMARK_TGF_BETA_SIGNALING	0.949721	1	0.100991	-0.223061	-0.748019	Both_CD44std_vs_Parental
395	HALLMARK_TNFA_SIGNALING_VIA_NFKB	0.000732103	0.00406724	0.477271	0.485466	1.49656	Both_CD44std_vs_Parental
396	HALLMARK_UNFOLDED_PROTEIN_RESPONSE	0.011539	0.0395081	0.38073	-0.373895	-1.38947	Both_CD44std_vs_Parental
397	HALLMARK_UV_RESPONSE_DN	0.750268	1	0.0299196	0.28809	0.873966	Both_CD44std_vs_Parental
398	HALLMARK_UV_RESPONSE_UP	0.772436	1	0.0282924	0.285354	0.868035	Both_CD44std_vs_Parental
399	HALLMARK_WNT_BETA_CATENIN_SIGNALING	0.990874	1	0.0256927	0.211704	0.544161	Both_CD44std_vs_Parental
400	HALLMARK_XENOBIOTIC_METABOLISM	0.112853	0.23511	0.131458	0.387505	1.19365	Both_CD44std_vs_Parental
401	HALLMARK_ADIPOGENESIS	0.776261	1	0.027167	0.31395	0.868336	Both_CD44v6_vs_Parental
402	HALLMARK_ALLOGRAFT_REJECTION	0.0278419	0.0928062	0.352488	0.474374	1.30607	Both_CD44v6_vs_Parental
403	HALLMARK_ANDROGEN_RESPONSE	0.76	1	0.0310618	0.321728	0.851323	Both_CD44v6_vs_Parental
404	HALLMARK_ANGIOGENESIS	0.100132	0.222202	0.159647	0.581074	1.31617	Both_CD44v6_vs_Parental
405	HALLMARK_APICAL_JUNCTION	0.362304	0.646971	0.0628004	0.381048	1.05745	Both_CD44v6_vs_Parental
406	HALLMARK_APICAL_SURFACE	0.636132	1	0.045679	0.382447	0.906949	Both_CD44v6_vs_Parental
407	HALLMARK_APOPTOSIS	0.0585106	0.152778	0.190023	0.46107	1.25997	Both_CD44v6_vs_Parental
408	HALLMARK_BILE_ACID_METABOLISM	0.134213	0.279611	0.122679	0.453675	1.20741	Both_CD44v6_vs_Parental
409	HALLMARK_CHOLESTEROL_HOMEOSTASIS	0.942353	1	0.0227982	0.278946	0.710501	Both_CD44v6_vs_Parental
410	HALLMARK_COAGULATION	0.0111924	0.046635	0.38073	0.52033	1.40342	Both_CD44v6_vs_Parental
411	HALLMARK_COMPLEMENT	0.0946372	0.222202	0.145516	0.435991	1.20658	Both_CD44v6_vs_Parental
412	HALLMARK_DNA_REPAIR	0.925373	1	0.17822	-0.24879	-0.867652	Both_CD44v6_vs_Parental
413	HALLMARK_E2F_TARGETS	6.52427e-10	8.15534e-09	0.801216	-0.529709	-1.97865	Both_CD44v6_vs_Parental
414	HALLMARK_EPITHELIAL_MESENCHYMAL_TRANSITION	0.0126639	0.0487074	0.38073	0.488348	1.35148	Both_CD44v6_vs_Parental
415	HALLMARK_ESTROGEN_RESPONSE_EARLY	0.895397	1	0.0187776	0.287298	0.797469	Both_CD44v6_vs_Parental
416	HALLMARK_ESTROGEN_RESPONSE_LATE	0.995807	1	0.0105707	0.236938	0.657213	Both_CD44v6_vs_Parental
417	HALLMARK_FATTY_ACID_METABOLISM	0.273504	0.52597	0.077884	0.406241	1.10734	Both_CD44v6_vs_Parental
418	HALLMARK_G2M_CHECKPOINT	0.00194728	0.00885127	0.45506	-0.376405	-1.40501	Both_CD44v6_vs_Parental
419	HALLMARK_GLYCOLYSIS	0.997895	1	0.0107873	0.222396	0.615292	Both_CD44v6_vs_Parental
420	HALLMARK_HEDGEHOG_SIGNALING	0.173333	0.346667	0.227987	-0.439472	-1.19123	Both_CD44v6_vs_Parental
421	HALLMARK_HEME_METABOLISM	0.876712	1	0.0205626	0.296474	0.820348	Both_CD44v6_vs_Parental
422	HALLMARK_HYPOXIA	0.785115	1	0.0264649	0.313216	0.868792	Both_CD44v6_vs_Parental
423	HALLMARK_IL2_STAT5_SIGNALING	0.0180857	0.0645917	0.352488	0.481123	1.33689	Both_CD44v6_vs_Parental
424	HALLMARK_IL6_JAK_STAT3_SIGNALING	2.52244e-05	0.000157652	0.57561	0.664157	1.72876	Both_CD44v6_vs_Parental
425	HALLMARK_INFLAMMATORY_RESPONSE	5.01983e-08	5.01983e-07	0.719513	0.618321	1.71222	Both_CD44v6_vs_Parental
426	HALLMARK_INTERFERON_ALPHA_RESPONSE	3.19858e-11	5.33097e-10	0.851339	0.763231	2.00481	Both_CD44v6_vs_Parental
427	HALLMARK_INTERFERON_GAMMA_RESPONSE	2.17413e-11	5.33097e-10	0.863415	0.67437	1.86574	Both_CD44v6_vs_Parental
428	HALLMARK_KRAS_SIGNALING_DN	0.102213	0.222202	0.1396	0.43832	1.20856	Both_CD44v6_vs_Parental
429	HALLMARK_KRAS_SIGNALING_UP	0.000591643	0.00295822	0.477271	0.54035	1.49415	Both_CD44v6_vs_Parental
430	HALLMARK_MITOTIC_SPINDLE	1	1	0.0101264	0.134101	0.371966	Both_CD44v6_vs_Parental
431	HALLMARK_MTORC1_SIGNALING	0.0442157	0.130046	0.321776	-0.320414	-1.19601	Both_CD44v6_vs_Parental
432	HALLMARK_MYC_TARGETS_V1	1.5541e-13	7.7705e-12	0.943632	-0.614161	-2.26928	Both_CD44v6_vs_Parental
433	HALLMARK_MYC_TARGETS_V2	0.000136868	0.00076038	0.518848	-0.605654	-1.80988	Both_CD44v6_vs_Parental
434	HALLMARK_MYOGENESIS	0.284664	0.527155	0.0749279	0.394256	1.09175	Both_CD44v6_vs_Parental
435	HALLMARK_NOTCH_SIGNALING	0.925926	1	0.0847985	-0.263247	-0.705307	Both_CD44v6_vs_Parental
436	HALLMARK_OXIDATIVE_PHOSPHORYLATION	7.44159e-06	6.20132e-05	0.610527	-0.452726	-1.67849	Both_CD44v6_vs_Parental
437	HALLMARK_P53_PATHWAY	0.969442	1	0.0135373	0.25891	0.716408	Both_CD44v6_vs_Parental
438	HALLMARK_PANCREAS_BETA_CELLS	0.0370844	0.115889	0.266351	0.616486	1.44339	Both_CD44v6_vs_Parental
439	HALLMARK_PEROXISOME	0.0611111	0.152778	0.190023	0.485575	1.28488	Both_CD44v6_vs_Parental
440	HALLMARK_PI3K_AKT_MTOR_SIGNALING	0.654828	1	0.0380842	0.347943	0.923508	Both_CD44v6_vs_Parental
441	HALLMARK_PROTEIN_SECRETION	1	1	0.0165176	0.187132	0.491836	Both_CD44v6_vs_Parental
442	HALLMARK_REACTIVE_OXIGEN_SPECIES_PATHWAY	0.805486	1	0.0338245	0.32791	0.791048	Both_CD44v6_vs_Parental
443	HALLMARK_SPERMATOGENESIS	0.59806	0.996767	0.0409056	0.350124	0.944026	Both_CD44v6_vs_Parental
444	HALLMARK_TGF_BETA_SIGNALING	1	1	0.0975449	-0.160259	-0.484938	Both_CD44v6_vs_Parental
445	HALLMARK_TNFA_SIGNALING_VIA_NFKB	1.33673e-05	9.54806e-05	0.593325	0.577402	1.59891	Both_CD44v6_vs_Parental
446	HALLMARK_UNFOLDED_PROTEIN_RESPONSE	0.776596	1	0.16318	-0.266056	-0.899841	Both_CD44v6_vs_Parental
447	HALLMARK_UV_RESPONSE_DN	0.377801	0.651382	0.0617054	0.386218	1.05064	Both_CD44v6_vs_Parental
448	HALLMARK_UV_RESPONSE_UP	0.726496	1	0.031349	0.325127	0.88624	Both_CD44v6_vs_Parental
449	HALLMARK_WNT_BETA_CATENIN_SIGNALING	0.979721	1	0.024779	0.258555	0.612704	Both_CD44v6_vs_Parental
450	HALLMARK_XENOBIOTIC_METABOLISM	0.0610526	0.152778	0.184706	0.447655	1.2385	Both_CD44v6_vs_Parental
