# Supplementary material for: Alternative splicing downstream of EMT enhances phenotypic plasticity and malignant behavior in colon cancer
Source: eLife. 2022 Nov 8;11:e82006. doi: 10.7554/eLife.82006 (PMC9674345; doi:10.7554/eLife.82006)
Supplement: Supplementary file 7. [file elife-82006-supp7.xlsx]

## Sheet: gsva_HALLMARKS
Supplementary File 7. GSVA analysis of CD44s OE vs CD44v6 OE vs parental cells in HCT116 and SW480
Pathway	HCT116_CD44std_1	HCT116_CD44std_2	HCT116_CD44v6_1	HCT116_CD44v6_2	HCT116_Parental_1	HCT116_Parental_2	SW480_CD44std_1	SW480_CD44std_2	SW480_CD44v6_1	SW480_CD44v6_2	SW480_Parental_1	SW480_Parental_2
HALLMARK_ADIPOGENESIS	-0.0904163	-0.25736	-0.279172	-0.227133	-0.0462785	0.110031	-0.0872339	0.048831	-0.169739	-0.164048	0.101973	-0.178527
HALLMARK_ALLOGRAFT_REJECTION	-0.417644	-0.39831	-0.327918	-0.324862	-0.485049	-0.483219	-0.473362	-0.375141	-0.33484	-0.397186	-0.346932	-0.467453
HALLMARK_ANDROGEN_RESPONSE	-0.0785451	0.0355638	-0.0636261	0.147801	-0.122659	0.157368	0.048411	-0.392526	-0.162562	-0.210317	0.013802	-0.203428
HALLMARK_ANGIOGENESIS	0.288456	-0.0695337	-0.10217	-0.326402	-0.0317008	-0.0136346	0.0422005	-0.110862	0.0248709	-0.199671	-0.167805	-0.143938
HALLMARK_APICAL_JUNCTION	0.0344514	-0.234881	0.00852876	-0.16748	-0.150311	-0.0996146	-0.363782	-0.390007	-0.133584	-0.0591628	-0.119347	-0.291796
HALLMARK_APICAL_SURFACE	0.137859	-0.213813	-0.0156909	-0.267437	-0.0587624	-0.105929	-0.160183	-0.207033	0.287468	0.08762	-0.177384	-0.162483
HALLMARK_APOPTOSIS	-0.0186382	-0.294795	-0.235488	-0.19164	-0.264828	-0.249458	-0.159157	-0.197387	-0.0849843	-0.173559	0.068467	-0.293809
HALLMARK_BILE_ACID_METABOLISM	-0.0691683	-0.228754	-0.107144	-0.0450696	-0.136912	-0.0719079	0.0419315	0.0525817	0.111829	0.156145	0.0598638	-0.12861
HALLMARK_CHOLESTEROL_HOMEOSTASIS	0.0480263	-0.0102247	-0.077548	-0.0391125	-0.41752	0.0207929	-0.151657	0.00623692	-0.335885	-0.22294	0.210647	-0.143738
HALLMARK_COAGULATION	0.17084	0.0506344	-0.178174	-0.166611	-0.333745	-0.359261	-0.0813437	-0.162877	-0.252049	-0.156819	-0.205915	-0.301003
HALLMARK_COMPLEMENT	0.0376771	-0.141031	-0.188736	-0.202614	-0.382986	-0.266062	-0.107234	-0.201141	-0.205595	-0.215571	-0.147038	-0.301592
HALLMARK_DNA_REPAIR	-0.372709	-0.31292	-0.247948	-0.310923	-0.0152911	0.119413	-0.300843	0.0581639	-0.351665	-0.408374	-0.0189127	-0.179907
HALLMARK_E2F_TARGETS	-0.63162	-0.344594	-0.397212	-0.352949	0.248429	0.343981	0.14908	0.0692332	-0.223547	-0.326861	-0.26529	0.192345
HALLMARK_EPITHELIAL_MESENCHYMAL_TRANSITION	0.221238	0.0271091	-0.0145537	-0.126806	-0.311405	-0.306998	0.180663	0.0455078	0.0133178	-0.085675	-0.154716	-0.0681602
HALLMARK_ESTROGEN_RESPONSE_EARLY	-0.00815268	-0.298863	0.00645433	-0.106435	-0.054382	0.0399376	-0.339753	-0.347392	-0.00103192	0.0108271	0.0717312	-0.335436
HALLMARK_ESTROGEN_RESPONSE_LATE	-0.058882	-0.238407	-0.0492825	-0.0831739	-0.0536899	0.0532552	-0.329628	-0.287845	-0.0647827	-0.106863	-0.041453	-0.289906
HALLMARK_FATTY_ACID_METABOLISM	-0.237566	-0.224673	-0.326467	-0.258738	-0.137847	0.0382173	-0.0315811	0.131253	-0.0280475	-0.0596327	0.0578504	-0.104185
HALLMARK_G2M_CHECKPOINT	-0.599339	-0.264473	-0.318191	-0.322791	0.194241	0.384886	0.27003	-0.0421195	-0.0744104	-0.167152	-0.132488	0.330387
HALLMARK_GLYCOLYSIS	-0.120365	-0.201224	-0.178396	-0.118828	-0.0150537	0.0797289	-0.226765	-0.0965246	-0.219238	-0.141622	0.0591665	-0.210473
HALLMARK_HEDGEHOG_SIGNALING	-0.101521	-0.31866	-0.255061	-0.343845	-0.30399	-0.399029	0.143936	-0.0475204	0.216606	0.354606	0.256554	0.218829
HALLMARK_HEME_METABOLISM	0.0322606	-0.293676	-0.158037	-0.230533	-0.147622	-0.18292	-0.0249352	-0.196774	-0.059417	0.0212157	-0.0153414	-0.204101
HALLMARK_HYPOXIA	0.111074	-0.256216	-0.0757985	-0.0988763	-0.196528	-0.222754	-0.177405	-0.196609	-0.0527938	-0.022698	0.0464385	-0.325502
HALLMARK_IL2_STAT5_SIGNALING	0.0641158	-0.237561	-0.0767345	-0.0934195	-0.371004	-0.214751	-0.112604	-0.190658	-0.111505	0.0419528	0.02096	-0.140686
HALLMARK_IL6_JAK_STAT3_SIGNALING	0.15728	-0.319236	0.0287966	-0.0701281	-0.390963	-0.399891	-0.373431	-0.279763	-0.151908	-0.140078	-0.148198	-0.35981
HALLMARK_INFLAMMATORY_RESPONSE	0.177156	-0.171682	0.0811531	0.103585	-0.248012	-0.254152	-0.278659	-0.309817	-0.155124	-0.0315455	-0.0995754	-0.386306
HALLMARK_INTERFERON_ALPHA_RESPONSE	0.0302895	-0.410701	0.0868361	0.0650466	-0.593004	-0.558421	-0.468721	-0.396009	-0.35572	-0.426351	-0.412909	-0.554873
HALLMARK_INTERFERON_GAMMA_RESPONSE	-0.0908405	-0.381135	-0.050601	-0.0831265	-0.500282	-0.455737	-0.470586	-0.421673	-0.315468	-0.317508	-0.360502	-0.470635
HALLMARK_KRAS_SIGNALING_DN	0.00428181	-0.172429	-0.0550349	-0.0872733	-0.171932	-0.324211	-0.0542873	-0.0153765	0.0456189	-0.0152262	-0.231237	-0.116416
HALLMARK_KRAS_SIGNALING_UP	0.123605	-0.101654	-0.134916	-0.0505562	-0.351515	-0.297095	-0.105505	-0.184291	0.0470024	-0.0528868	-0.132533	-0.234615
HALLMARK_MITOTIC_SPINDLE	-0.336987	-0.168361	-0.165452	-0.352432	-0.0835399	-0.119497	0.0786074	-0.385687	0.106282	-0.139856	-0.152418	0.0642604
HALLMARK_MTORC1_SIGNALING	-0.409477	-0.362223	-0.344901	-0.188655	0.0107706	0.0876092	-0.0274108	-0.0601512	-0.267893	-0.164708	0.295335	0.018011
HALLMARK_MYC_TARGETS_V1	-0.67961	-0.453889	-0.426658	-0.33229	0.153754	0.275418	-0.151668	0.086062	-0.320425	-0.442347	0.0547414	-0.00940779
HALLMARK_MYC_TARGETS_V2	-0.656617	-0.439256	0.0167948	0.0152547	0.152159	0.579989	-0.212519	0.163538	-0.339216	-0.527991	0.307512	0.0119477
HALLMARK_MYOGENESIS	0.126414	-0.138615	0.0141378	-0.19999	-0.216444	-0.260267	-0.110233	-0.0554206	-0.0334997	0.0483093	-0.105743	-0.247177
HALLMARK_NOTCH_SIGNALING	0.0689036	-0.47757	-0.360755	-0.47315	-0.0460408	0.129693	-0.00890748	-0.149187	0.156896	0.164135	-0.130383	-0.0879785
HALLMARK_OXIDATIVE_PHOSPHORYLATION	-0.422087	-0.474298	-0.47436	-0.334672	-0.0771019	0.215063	-0.156779	0.286743	-0.340844	-0.206676	0.202054	-0.0524617
HALLMARK_P53_PATHWAY	0.00753251	-0.332505	-0.10531	-0.215405	0.00612294	-0.0822307	-0.289875	-0.247213	-0.0131665	-0.105027	0.14699	-0.314452
HALLMARK_PANCREAS_BETA_CELLS	-0.297986	-0.380696	-0.218936	-0.262798	-0.113268	-0.241775	0.244561	0.228982	0.0155044	0.0842134	-0.16069	0.161778
HALLMARK_PEROXISOME	-0.188602	-0.242005	-0.257889	-0.115462	-0.142971	0.0147221	-0.0732012	0.0199609	0.011734	-0.0815035	0.00862816	-0.178712
HALLMARK_PI3K_AKT_MTOR_SIGNALING	-0.252674	-0.263421	-0.314216	-0.218161	-0.15146	-0.136278	-0.132851	-0.192672	-0.123444	-0.162266	0.0351992	-0.0611239
HALLMARK_PROTEIN_SECRETION	-0.306386	-0.0293191	-0.430312	-0.0193142	-0.237508	0.0373481	0.368772	-0.0673082	-0.0341111	-0.156619	0.0189225	0.00856665
HALLMARK_REACTIVE_OXYGEN_SPECIES_PATHWAY	-0.0219693	-0.3255	-0.360619	-0.240167	-0.0492249	0.221931	-0.396024	-0.0485179	-0.406205	-0.470016	0.0848097	-0.439711
HALLMARK_SPERMATOGENESIS	-0.26987	0.0182573	-0.104091	-0.0460034	-0.0888947	-0.0633437	0.131916	0.0507051	-0.0317797	-0.142405	-0.162358	0.0630276
HALLMARK_TGF_BETA_SIGNALING	0.0882026	-0.168945	-0.214055	-0.32711	-0.322021	-0.0212565	-0.0679271	-0.441171	0.0055616	-0.0646743	0.0484012	-0.154417
HALLMARK_TNFA_SIGNALING_VIA_NFKB	0.224831	-0.237848	0.191721	0.10579	-0.387513	-0.336911	-0.38588	-0.417645	-0.125325	-0.233809	0.132582	-0.418571
HALLMARK_UNFOLDED_PROTEIN_RESPONSE	-0.143338	-0.18596	-0.138557	0.0211956	0.149782	0.317294	-0.292963	-0.279699	-0.305669	-0.315667	0.25184	-0.18303
HALLMARK_UV_RESPONSE_DN	0.0157814	-0.095554	0.0169652	-0.0606304	-0.237046	-0.15167	0.020572	-0.387635	0.0336627	-0.116929	-0.149083	-0.0819276
HALLMARK_UV_RESPONSE_UP	-0.200485	-0.395125	-0.319594	-0.342907	-0.243869	-0.115185	-0.304853	-0.202026	-0.140252	-0.178689	0.0608051	-0.299125
HALLMARK_WNT_BETA_CATENIN_SIGNALING	-0.0539946	-0.498695	-0.435999	-0.591264	-0.471869	-0.408776	-0.0657153	-0.193592	0.163234	-0.0036644	0.0691249	0.0721495
HALLMARK_XENOBIOTIC_METABOLISM	-0.000282648	-0.277246	-0.178024	-0.187482	-0.233104	-0.129817	-0.179697	-0.0352955	-0.183509	-0.103455	-0.0524839	-0.243054
