# Supplementary figures and images for: Alternative splicing downstream of EMT enhances phenotypic plasticity and malignant behavior in colon cancer
Source: eLife journal article supplement (doi:10.7554/elife.82006), 2022-11-08

Figure 5- figure supplement 1

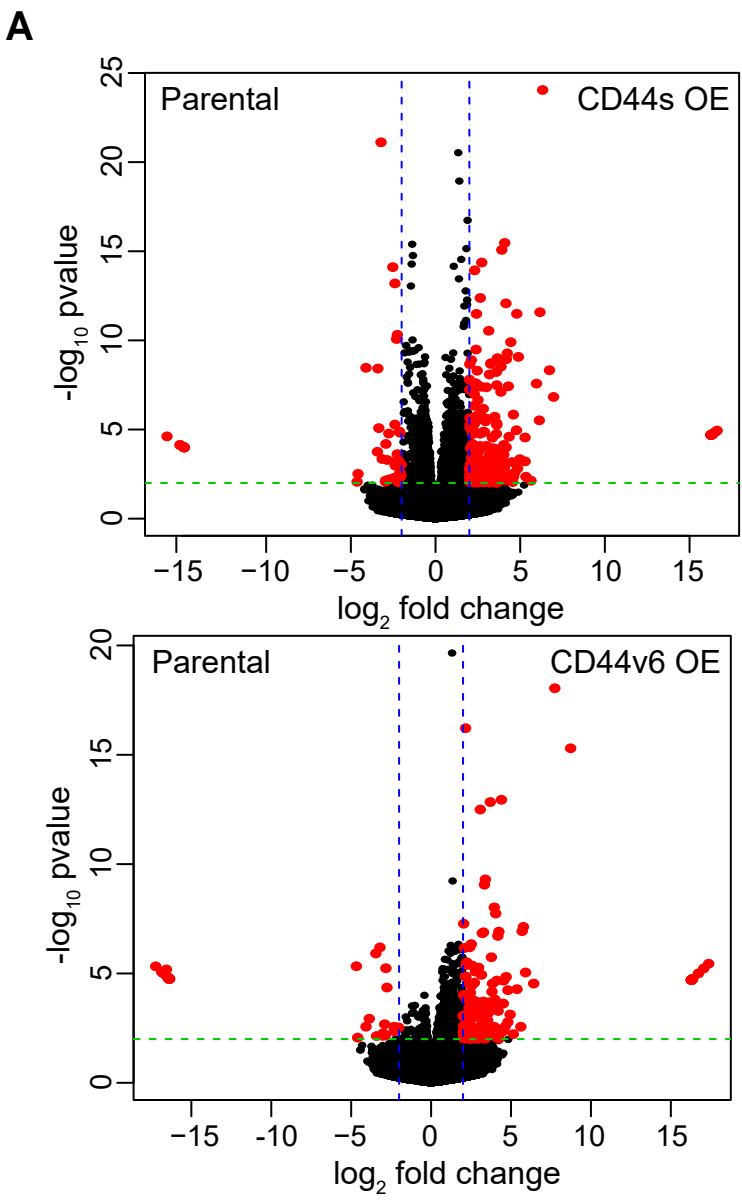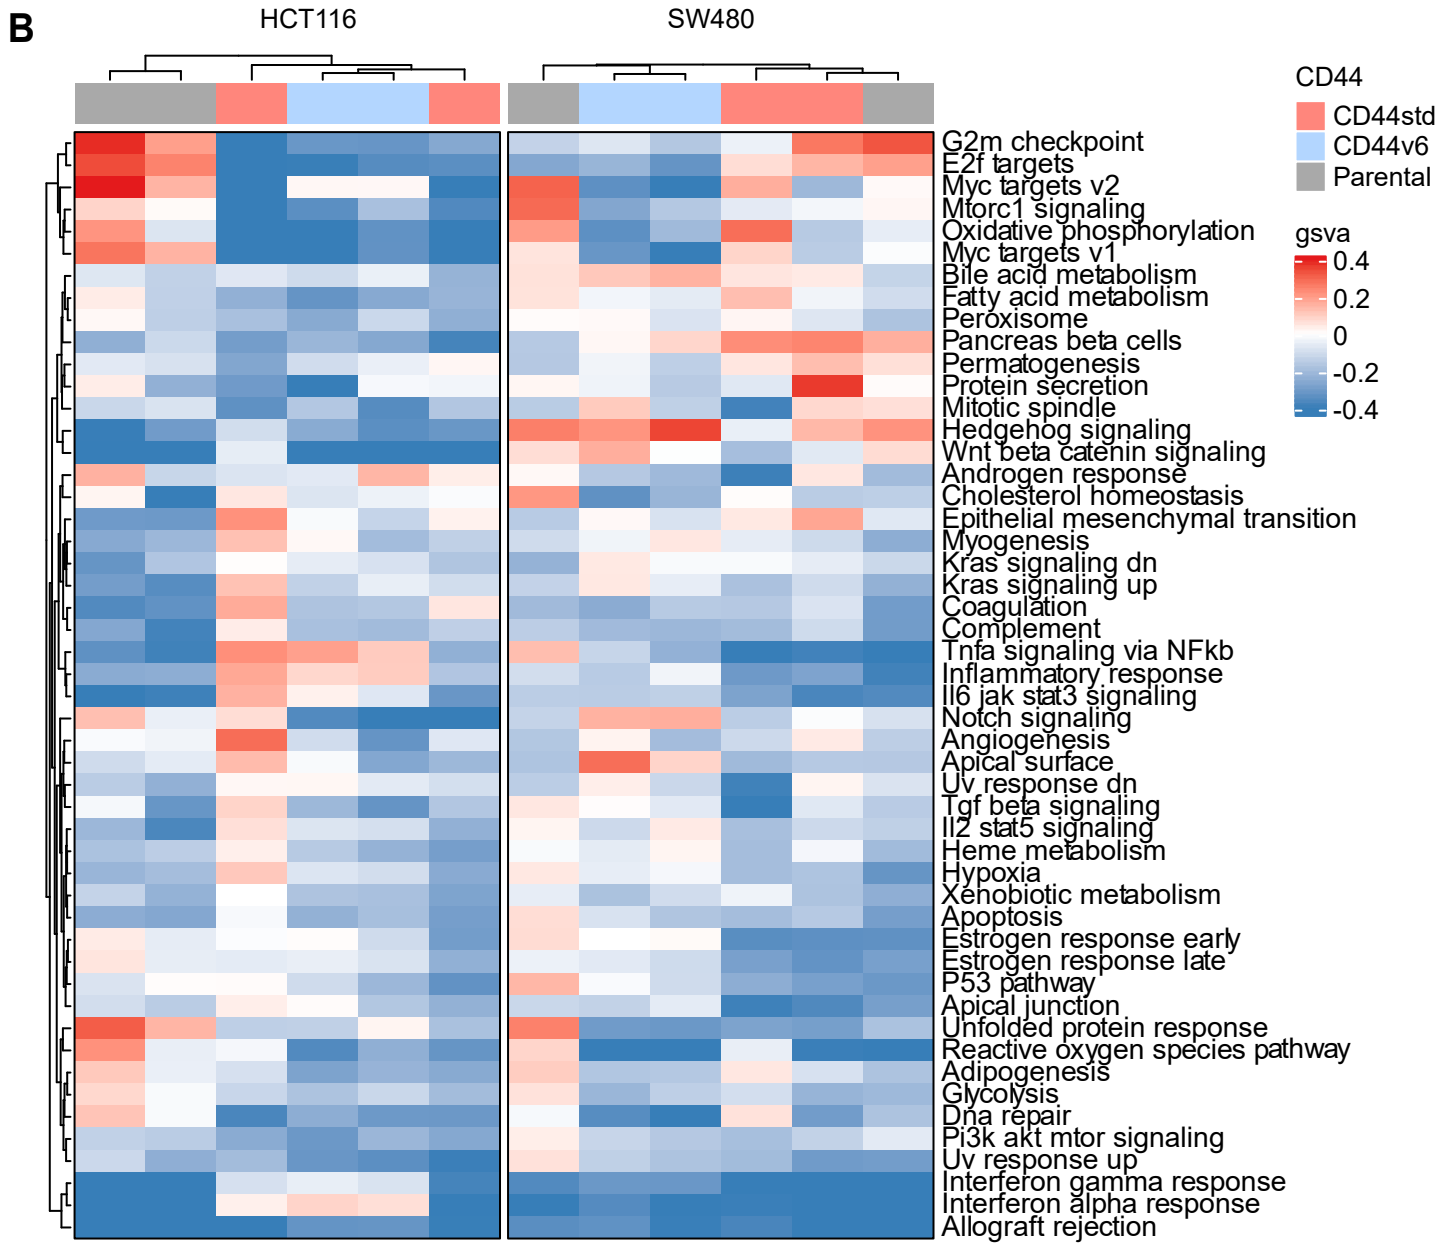

Supplement: supp [file elife-82006-supp-v1.zip]

Figure 7- figure supplement 1

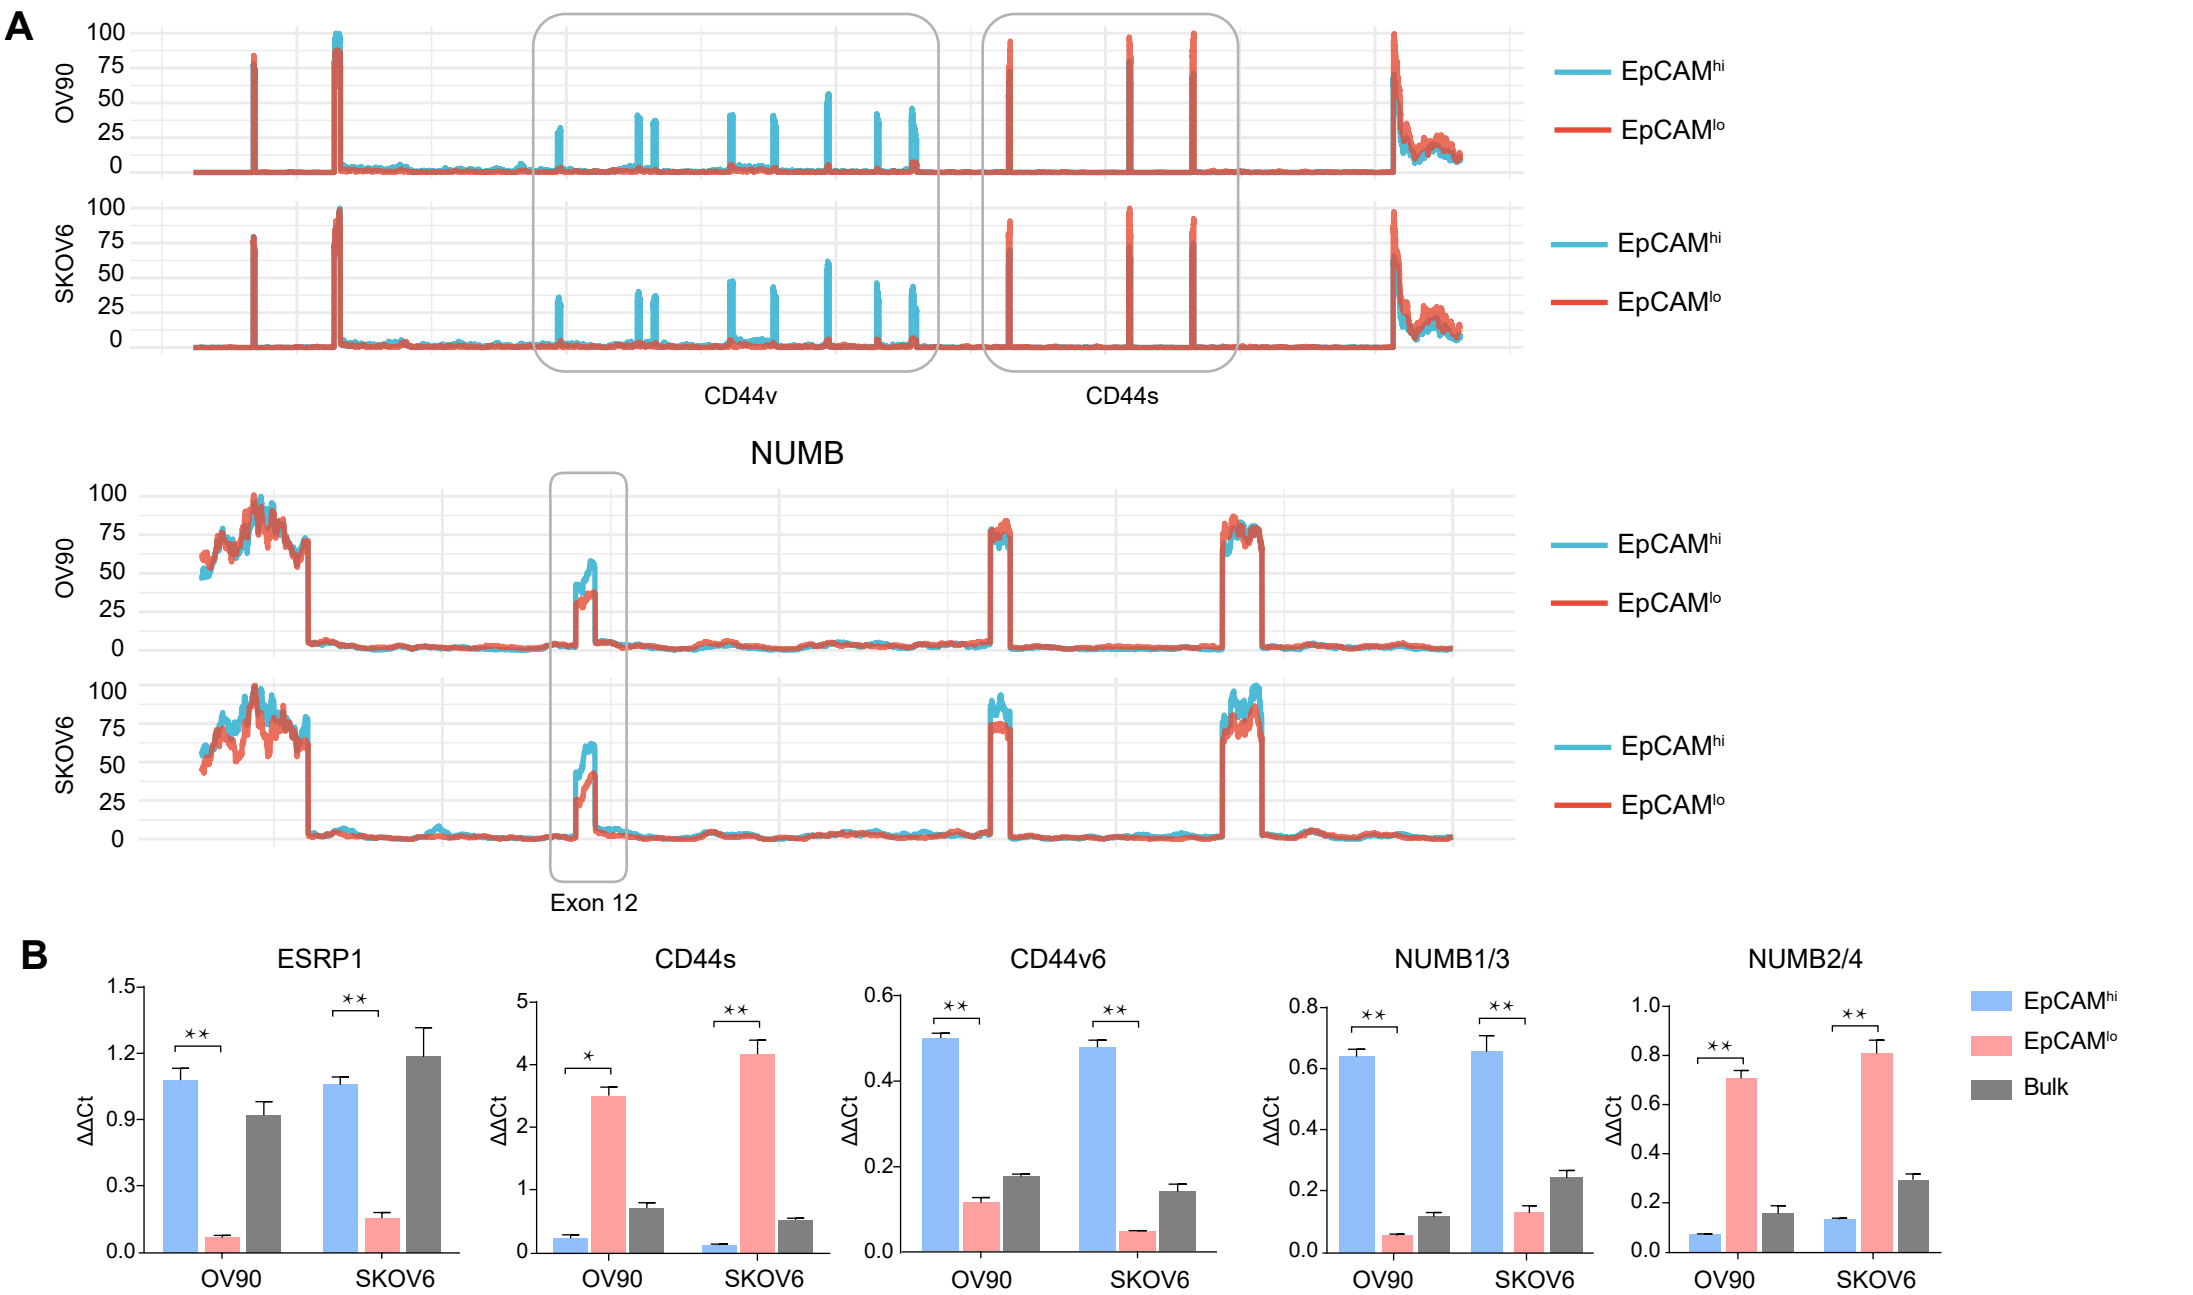

Supplement: supp [file elife-82006-supp-v1.zip]

Figure 2- figure supplement 1

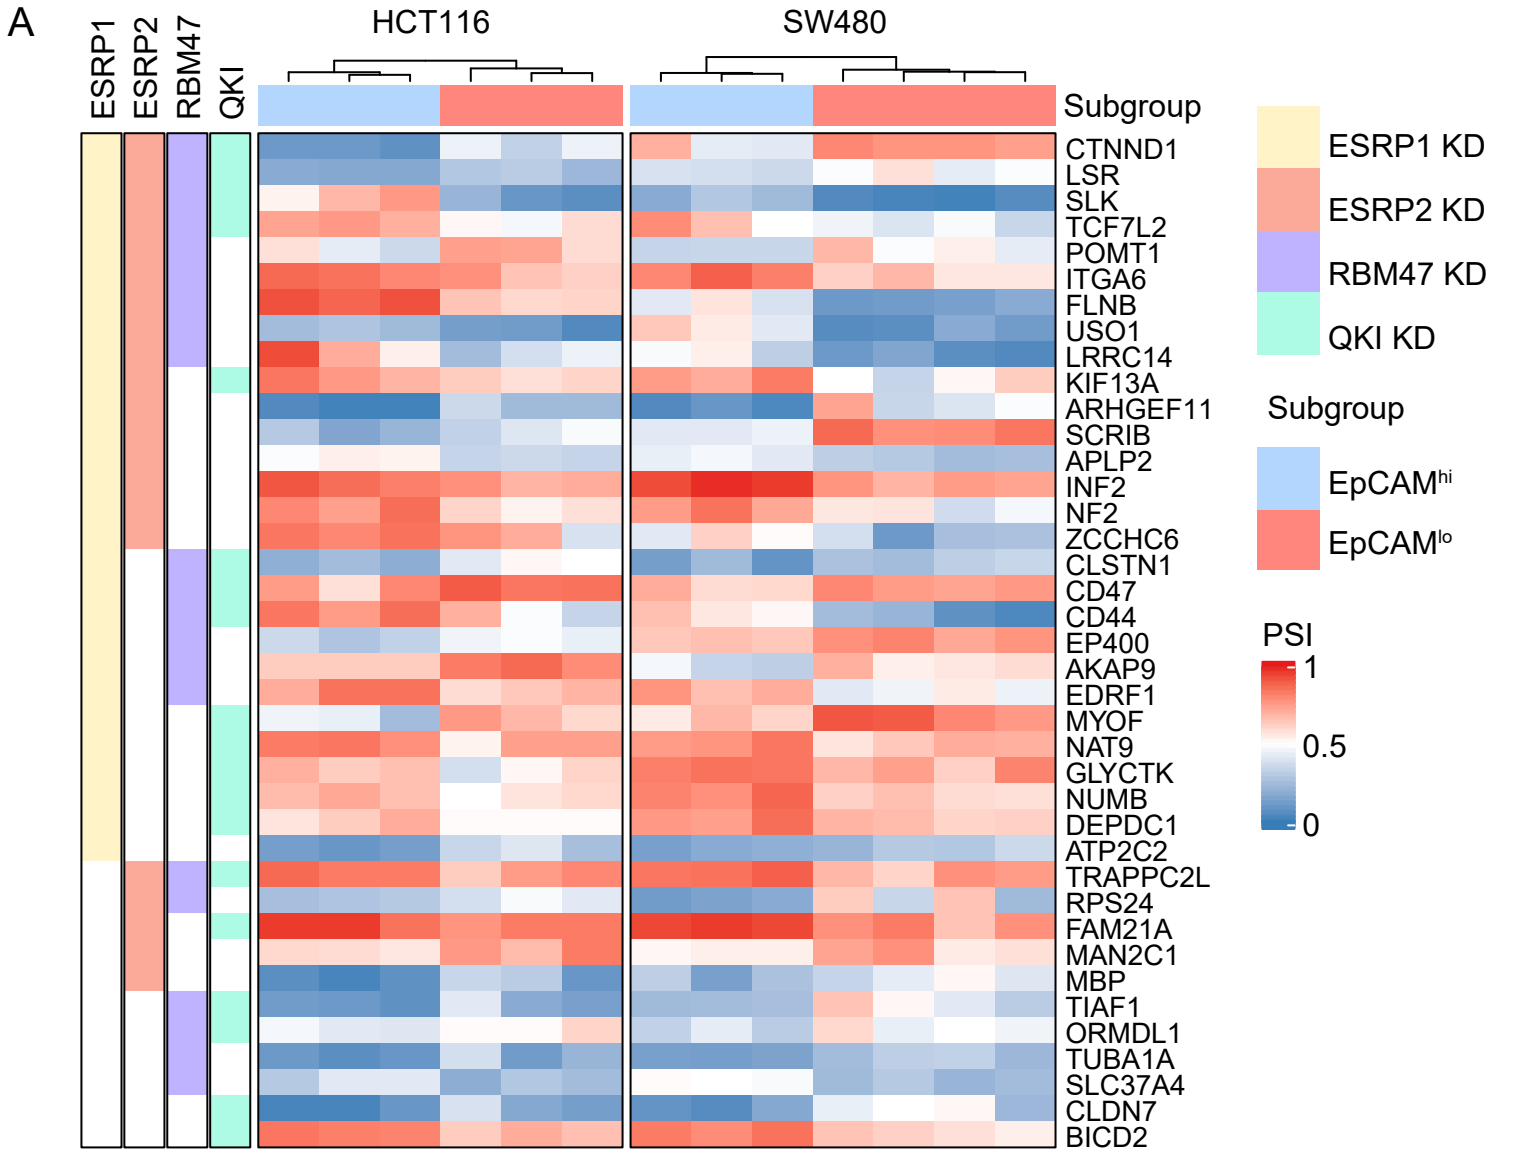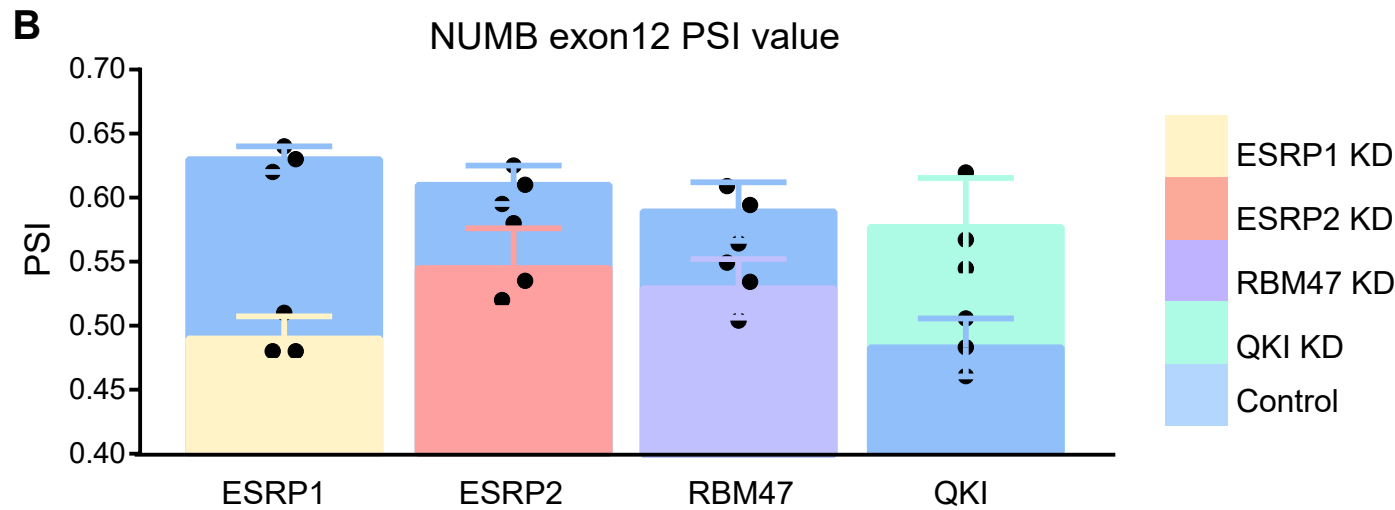

Supplement: supp [file elife-82006-supp-v1.zip]

Figure 4- figure supplement 1

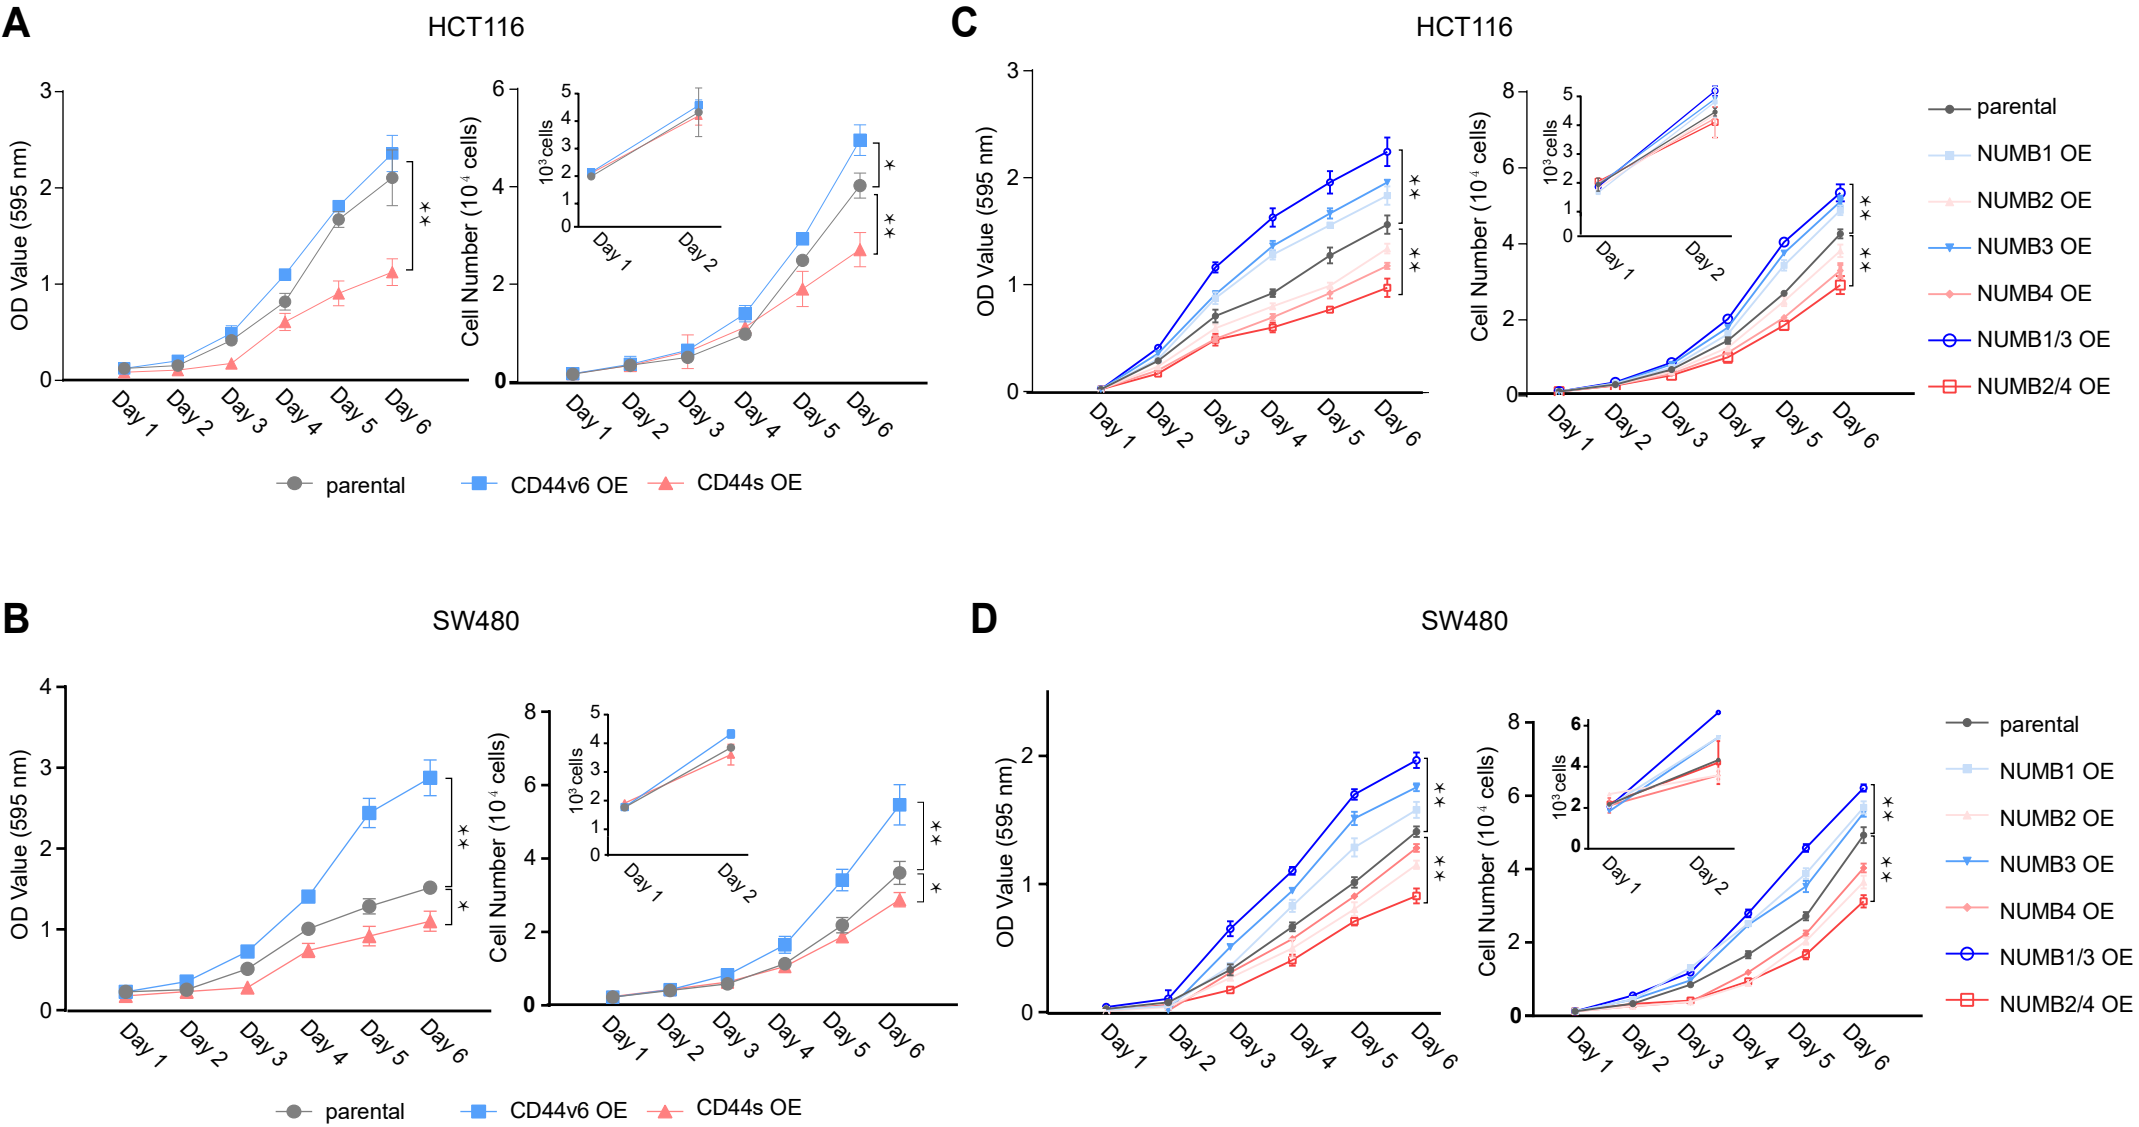

Supplement: supp [file elife-82006-supp-v1.zip]

Figure 3- figure supplement 2

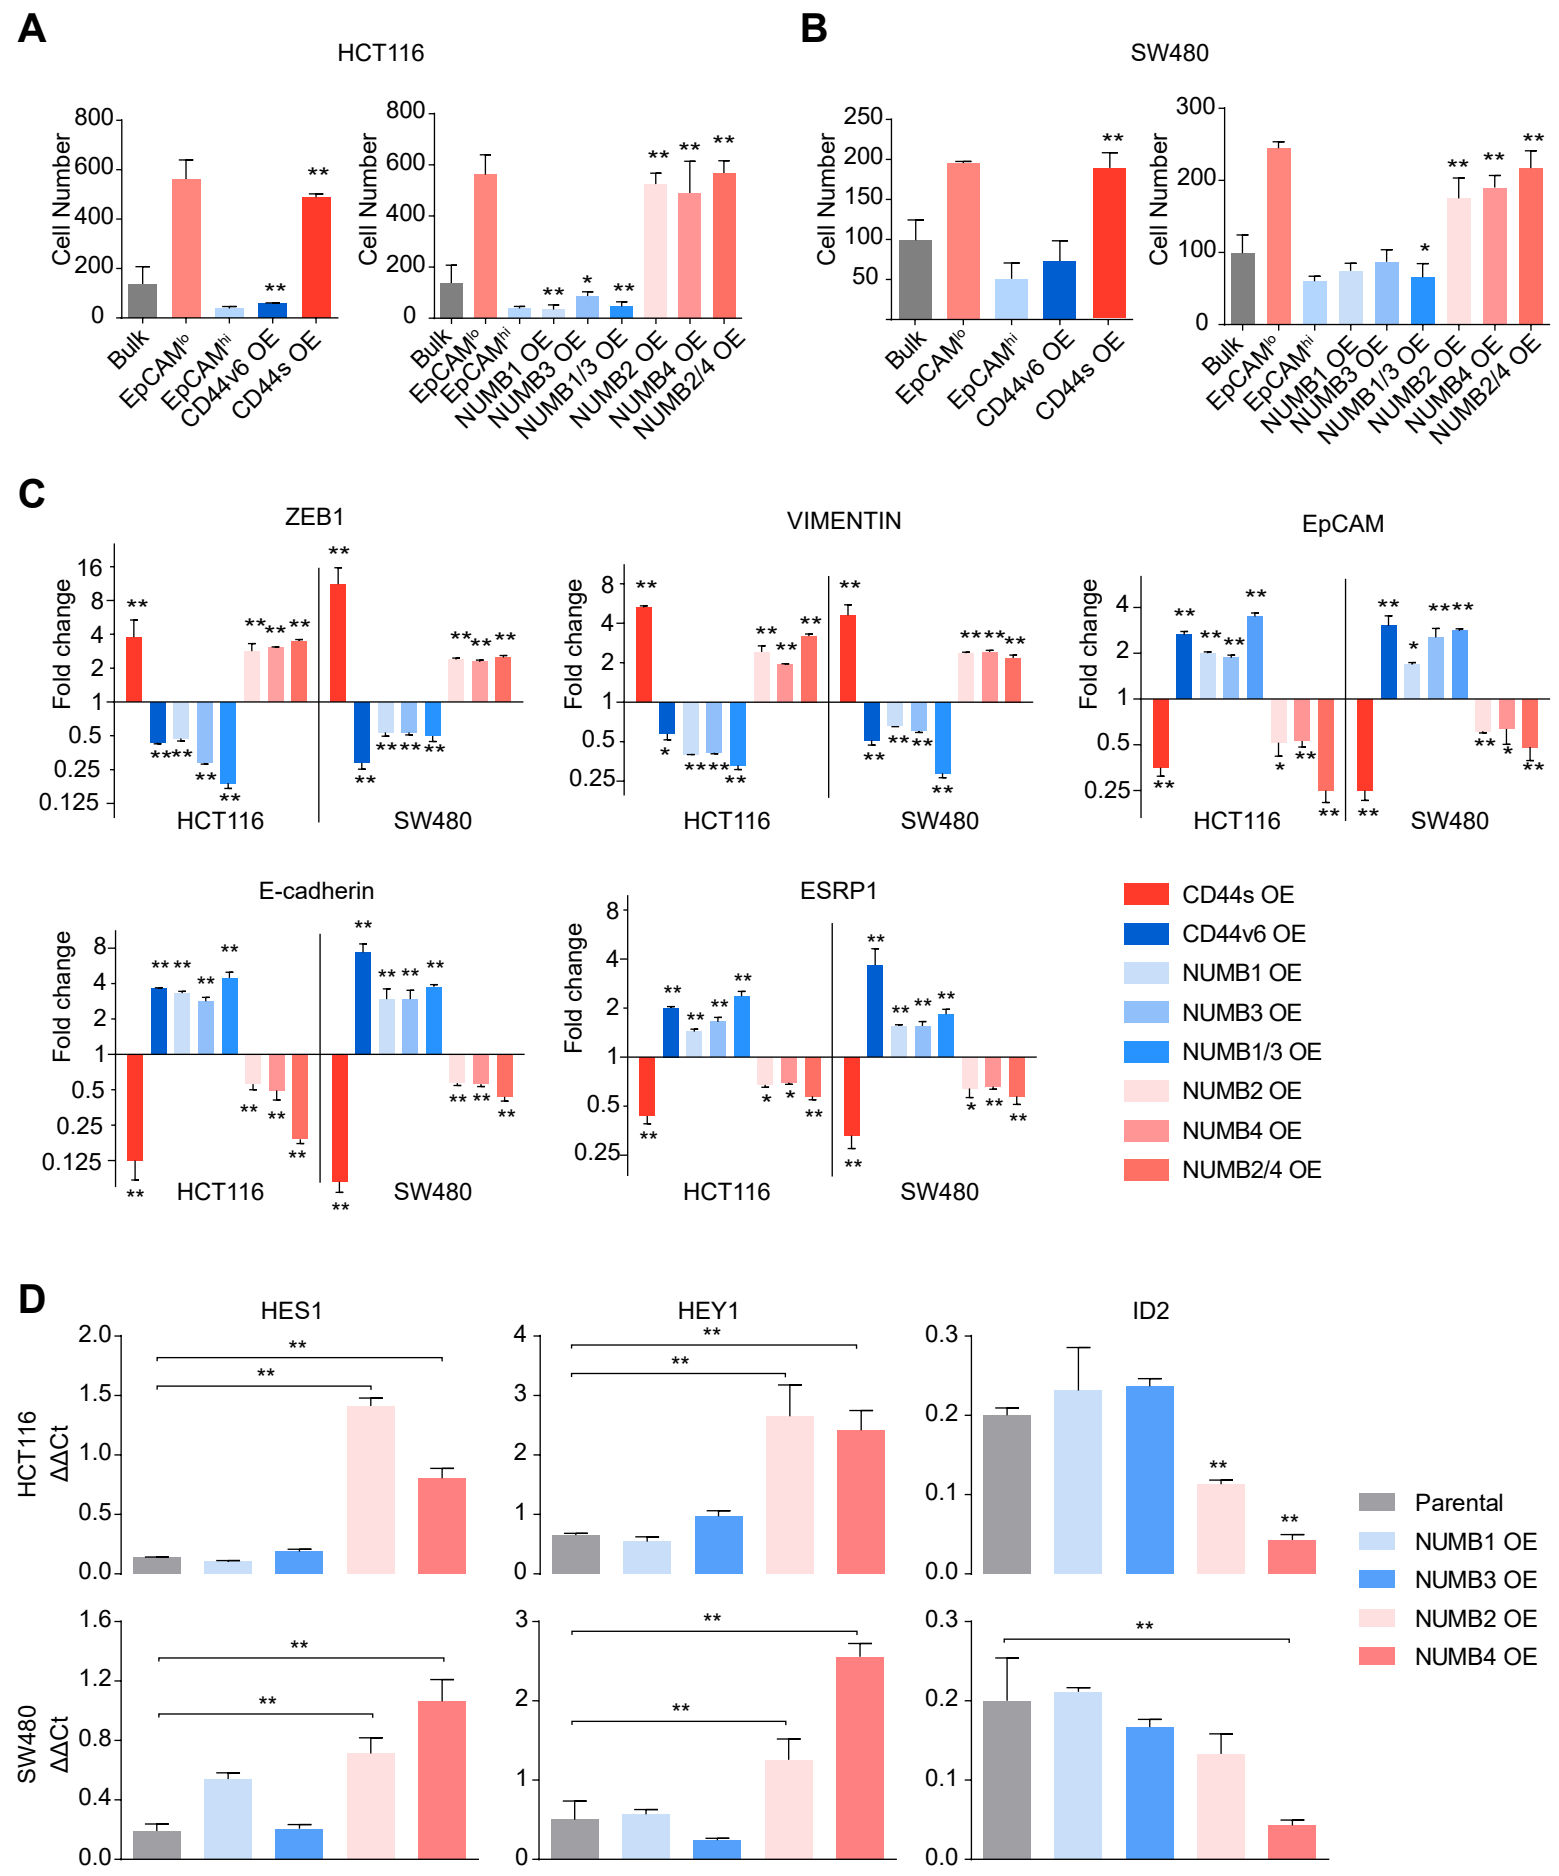

Supplement: supp [file elife-82006-supp-v1.zip]

Figure 3- figure supplement 1

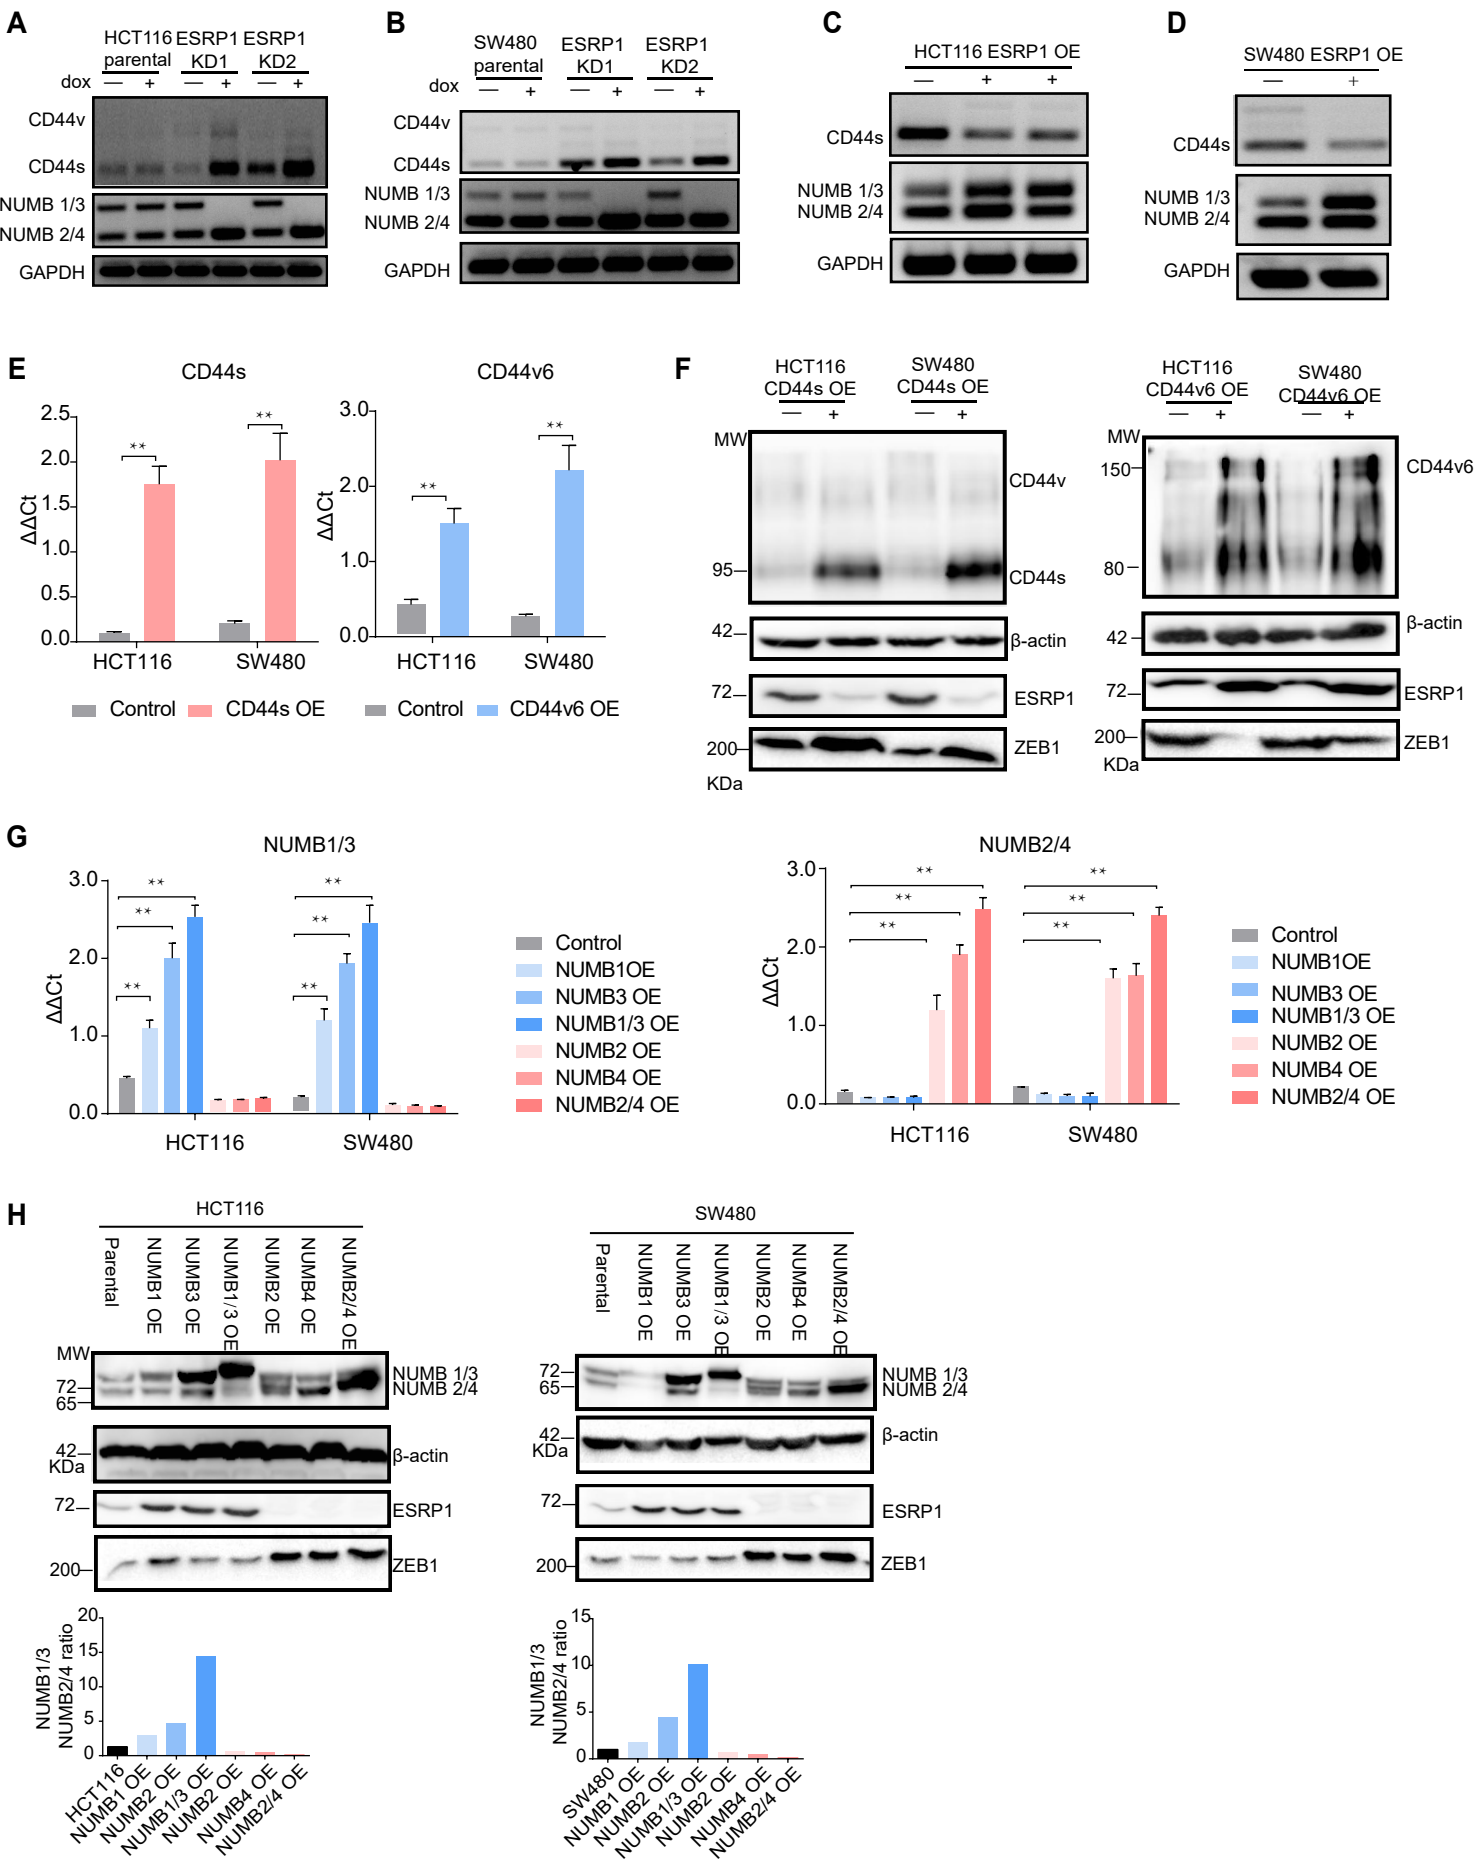

Supplement: supp [file elife-82006-supp-v1.zip]
